# Supplementary material for: Complex genetic architecture underlies human hand and foot evolution
Source: Research Square preprint supplement (doi:10.21203/rs.3.rs-7124496/v1), 2025-08-18
Supplement: Supplementary file 1 [file 01b6429d8ff2b250236d972c.xlsx]

## Sheet: Summary Data
				Proximal limbs						Hand ray 1				Hand ray 2						Hand ray 3						Hand ray 4						Hand ray 5						Foot ray 1				Foot ray 2						Foot ray 3
				Humerus	Radius	Ulna	Femur	Tibia	Fibula	MC1L	MC1W	PP1L	PP1W	MC2L	MC2W	PP2L	PP2W	MP2L	MP2W	MC3L	MC3W	PP3L	PP3W	MP3L	MP3W	MC4L	MC4W	PP4L	PP4W	MP4L	MP4W	MC5L	MC5W	PP5L	PP5W	MP5L	MP5W	MT1L	MT1W	FPP1L	FPP1W	MT2L	MT2W	FFPP2L	FFPP2W	FMP2L	FMP2W	MT3L	MT3W
Homo	n=48	(29F/19M)	Mean	316.141	239.891	257.974	445.469	371.031	359.911	44.3379	13.6413	30.6142	12.0464	65.1855	13.7538	40.4545	11.0942	24.0447	8.92722	64.6766	13.5575	45.15	11.7332	29.4341	9.37912	57.5543	12.3974	42.2549	11.1779	28.2387	9.30757	53.4379	11.9388	33.4166	9.27833	20.5642	8.26461	65.1191	20.7215	32.9086	15.8331	73.108	10.1139	28.6236	9.08828	13.0503	8.23129	69.7416	9.00679
			St Dev	18.2942	17.7274	18.5374	28.2104	26.4693	25.5584	2.80968	1.18549	2.52465	1.06555	3.96323	1.07177	2.99484	0.810893	2.12029	0.720674	4.35217	1.08873	3.55304	0.924618	2.66434	0.860374	3.75445	1.07239	3.15124	0.888476	2.58317	0.817674	3.89493	1.17405	2.54854	0.847804	2.43926	0.802847	4.25359	1.82866	3.39873	1.54186	5.17994	1.02082	2.90006	0.821089	2.44734	0.74192	5.19136	1.07701
			Variance	334.678	314.26	343.634	795.826	700.624	653.233	7.89431	1.4054	6.37385	1.1354	15.7072	1.14869	8.96909	0.657548	4.49565	0.519371	18.9414	1.18534	12.6241	0.854918	7.09873	0.740243	14.0959	1.15003	9.9303	0.78939	6.67274	0.668591	15.1705	1.37838	6.49506	0.718771	5.94998	0.644563	18.093	3.34401	11.5513	2.37732	26.8317	1.04206	8.41035	0.674188	5.98949	0.550446	26.9502	1.15995
Pan	n=44	(33F/11M)	Mean	300.716	272.83	288.818	294.511	249.58	226.591	40.0486	8.88736	25.4041	7.74405	85.7635	11.8512	48.6081	10.1724	31.3973	8.2996	84.173	12.8308	57.3732	12.1761	41.8395	9.49449	80.9635	11.726	53.7398	11.1784	38.9439	8.97855	74.9535	9.27951	41.4472	8.57599	27.257	7.2963	56.2953	15.4244	28.6912	11.4253	70.0811	9.83049	35.6326	7.70797	17.9108	6.87216	67.6141	9.81334
			St Dev	13.3871	16.4642	14.3621	15.3325	12.9659	12.444	2.07984	0.824982	2.41034	0.605046	4.95666	0.725851	2.83962	0.624589	2.48034	0.605282	4.20108	0.843826	3.23942	0.747486	2.81473	0.579521	4.33471	0.814907	2.98779	0.647039	2.65108	0.708762	4.19322	0.834323	2.47863	0.651275	2.29902	0.549608	2.86405	1.13436	1.79195	0.723277	4.21985	0.788059	2.09327	0.646857	2.45542	0.62096	4.13165	0.902237
			Variance	179.214	271.069	206.268	235.087	168.116	154.852	4.32572	0.680595	5.80976	0.366081	24.5685	0.526859	8.06344	0.390111	6.15208	0.366366	17.6491	0.712042	10.4939	0.558736	7.92273	0.335845	18.7897	0.664073	8.92689	0.418659	7.02823	0.502343	17.5831	0.696095	6.1436	0.42416	5.28547	0.302069	8.2028	1.28677	3.2111	0.52313	17.8072	0.621037	4.38179	0.418423	6.0291	0.385591	17.0705	0.814032
Gorilla	n=57	26F/31M)	Mean	418.947	335.92	354.598	355.184	294.167	261.544	49.7478	13.389	26.5823	10.4678	88.8891	16.5204	50.9523	13.3973	33.539	11.06	89.7287	17.3027	57.1302	15.5377	41.0037	12.4956	85.1947	15.9345	54.6313	14.7549	39.2144	11.9571	83.342	14.1784	45.1422	12.0915	30.8701	10.0882	63.0033	18.755	29.4635	14.8509	78.6052	12.2298	38.1346	10.3901	20.6994	9.03863	76.9751	11.5946
			St Dev	43.2829	35.6259	37.6469	38.0092	31.555	28.3192	6.22031	2.03611	5.29839	1.31071	9.24027	2.30722	5.08397	1.59477	3.4465	1.24241	9.16602	2.39891	5.59385	1.71806	4.21892	1.27769	8.67104	2.25023	5.50839	1.72687	3.95874	1.31762	8.73824	2.16477	4.72668	1.59872	3.55746	1.15174	6.94802	2.31093	3.58982	1.62695	7.93749	1.60989	4.02997	1.17467	2.78268	0.940894	7.95428	1.60489
			Variance	1873.41	1269.21	1417.29	1444.7	995.717	801.976	38.6923	4.14573	28.0729	1.71795	85.3826	5.32326	25.8467	2.54329	11.8784	1.54358	84.016	5.75479	31.2912	2.95172	17.7993	1.6325	75.187	5.06352	30.3423	2.98208	15.6716	1.73611	76.3569	4.68625	22.3415	2.55592	12.6555	1.32652	48.2749	5.34039	12.8868	2.64698	63.0038	2.59174	16.2406	1.37985	7.74332	0.885281	63.2705	2.57568
[truncated: 16 more columns]

## Sheet: Homo Sapiens
Specimen	Sex	Humerus	Radius	Ulna	Femur	Tibia	Fibula	MC1L	MC1W	PP1L	PP1W	MC2L	MC2W	PP2L	PP2W	MP2L	MP2W	MC3L	MC3W	PP3L	PP3W	MP3L	MP3W	MC4L	MC4W	PP4L	PP4W	MP4L	MP4W	MC5L	MC5W	PP5L	PP5W	MP5L	MP5W	MT1L	MT1W	FPP1L	FPP1W	MT2L	MT2W	FFPP2L	FFPP2W	FMP2L	FMP2W	MT3L	MT3W	FPP3L	FPP3W
HTH 1515	F	323	258.5	275.5	455	401.5	386	48.1968	15.3844	34.9776	12.2275	72.6489	14.9131	44.9784	11.6021	23.0332	8.74078	71.9978	14.3943	49.4595	12.5352	33.7343	9.85521	62.8583	13.7827	45.6486	11.1875	32.1845	9.31487	60.066	12.7552	37.8475	9.69683	27.2674	9.18311	73.0463	23.244	38.6511	15.9614	80.9779	11.0616	31.5353	9.74255	16.1436	8.75389	77.733	10.472	30.1456	9.11613
HTH 1534	F	336.5	275.5	294.5	468.5	406.5	398.5	49.6332	13.6316	36.4288	11.9407	70.3613	13.5469	44.9676	11.7796	27.4332	9.53694	72.5633	13.5533	51.2278	12.6335	33.708	10.1656	65.7862	12.7476	47.5845	11.7223	32.0363	9.99103	59.614	12.1369	37.8575	9.74697	24.3784	8.0718	75.1148	20.5881	40.6576	15.7373	82.4848	11.2221	33.2136	10.2869	18.0626	9.06566	79.6609	9.39838	30.6793	9.42238
HTH 1554	F	290	220.5	238	439.5	362.5	345	43.5372	12.9543	29.234	9.652	61.8215	12.2778	38.5643	9.73667	22.1254	7.71164	61.9807	12.0239	41.7626	10.0757	26.2489	7.53533	54.443	10.4418	39.3758	9.91504	24.6393	8.128	51.6644	10.081	30.6631	7.1527	16.5154	6.61268	65.6313	20.6614	31.2438	13.1506	70.2864	9.40753	28.4561	8.38157	11.5523	8.20219	68.7267	6.6672	25.5833	7.78289
HTH 1562	F	311.5	239	257	437.5	370	354.5	46.0441	13.81	32.3644	12.1993	66.2941	14.5629	42.4146	11.1875	27.3514	8.89161	73.2807	15.4949	48.1819	11.4071	32.5121	9.65349	60.6251	13.5731	44.6569	10.6626	30.4819	9.39953	64.8127	14.0723	35.6088	9.38579	23.9756	8.21965	64.7653	20.8419	34.2393	15.5023	73.2932	10.8373	30.8523	9.0787	15.9553	7.78979	68.678	8.95788	29.5546	7.62752
HTH 1622	F	286.25	220.5	237.5	413.25	344	325	41.0982	11.8609	26.4816	10.754	61.4695	13.8877	36.8301	9.7602	22.3138	7.89037	58.8449	12.6153	41.409	10.0757	26.6722	7.96272	52.7474	11.5175	38.3068	9.71455	25.3166	8.12844	48.9497	10.9223	29.8057	7.98968	19.0265	7.20911	58.6246	17.278	30.3108	13.8515	67.9027	8.90007	17.3567	7.65801	9.22867	7.70885	64.9185	7.8781	19.1867	5.93211
HTH 1694	F	324	241.5	260.5	446.5	370.5	357	40.929	13.2937	28.4511	11.3567	61.7278	12.7858	40.5061	10.5837	23.3939	8.48738	60.8812	12.7011	45.7263	11.2607	30.3107	8.89363	54.5286	12.1967	43.5372	10.6845	29.8262	8.99421	51.1421	11.0184	33.5367	9.09132	20.998	8.29777	63.1709	19.739	30.5876	16.0465	69.0121	9.06092	29.5176	8.12844	14.0587	7.74226	65.2958	8.71697	27.4654	7.96992
HTH 1739	F	293	213.5	232	427.5	340	336.5	42.5904	12.3903	29.7214	11.208	61.9991	14.3936	37.9383	11.4328	22.0226	8.50889	59.8596	13.3797	40.5561	11.9623	25.9092	9.14439	54.8928	12.7003	38.7807	11.5259	24.3088	9.40753	49.7156	12.2158	31.1578	9.67018	18.3822	7.78979	60.7787	20.8528	29.2991	13.717	65.0275	10.5109	27.5172	8.49372	10.4171	7.22103	62.8535	9.79941	25.7421	9.11613
HTH 1747	F	290.5	218.25	237	403.75	314.75	314	39.201	12.623	27.6096	10.338	59.0129	13.4663	35.9897	10.4171	23.2011	8.73545	58.171	12.7025	40.0481	11.008	28.1248	8.73094	53.2726	12.1967	38.693	10.8641	26.8459	8.55804	49.1916	10.9338	31.1615	8.52741	18.3005	7.54722	57.1501	18.7733	29.6335	14.4869	65.2782	9.58567	25.654	7.87582	12.7025	7.87446	61.0681	8.55301	23.1165	7.62047
HTH 1749	F	313	240.5	257.5	458	369.5	347.5	43.1007	12.7406	31.1447	11.435	62.8323	13.0387	39.633	10.9223	25.7278	8.39268	60.5396	12.7003	43.434	10.4226	30.0663	8.55133	54.9503	11.3456	41.0634	9.7602	28.1827	8.38243	51.8194	10.5	32.3389	7.4742	19.9842	7.40531	60.8548	18.3076	29.4617	13.5533	68.4979	8.76167	25.0619	8.52741	9.23837	7.11653	62.6557	6.69081	24.8933	7.40531
HTH 1786	F	310.5	237.5	252.5	446	365	350	43.3514	12.6292	30.0625	11.435	64.0116	13.1244	39.4269	10.3574	22.3526	8.16364	64.1129	13.2929	43.4607	11.3532	29.1298	8.66252	56.7298	12.541	40.7269	10.7086	28.2969	8.47344	50.5517	11.0917	32.274	9.07357	20.5459	7.83521	64.0584	19.2193	29.2376	15.4131	73.8311	11.3532	28.0708	8.69556	13.6442	8.71697	71.4342	9.52829	25.5163	8.10725
HTH 1804	M	306.5	233.5	251.5	424	354	347.5	41.6664	13.208	27.7151	12.1926	61.642	13.5469	37.0937	11.008	21.8442	9.48304	61.8069	13.5509	42.5877	11.7796	27.2477	10.0842	53.7746	12.6179	39.8802	11.6265	26.5093	9.82279	50.0391	11.1763	30.7508	9.48758	19.5587	8.8904	58.2118	18.9642	28.7121	15.4998	69.0899	10.5847	28.0534	9.23022	12.4644	8.65093	67.7758	10.5154	25.3223	8.78985
HTH 1807	M	318.5	248	266.5	448.5	387	375.5	44.2	15.691	32.1022	13.0562	64.7744	15.3331	43.5397	12.2869	25.8268	9.99389	66.97	15.7147	50.0415	13.3253	30.7382	9.8392	56.7727	14.9419	46.906	12.6446	30.4969	10.758	52.3308	14.0638	37.1783	10.5508	22.9523	9.23216	69.0262	18.8609	33.6213	17.1782	70.8838	9.66276	30.1798	9.71455	14.2144	8.32881	66.4858	7.0416	27.6025	8.80696
HTH 1843	F	324	227	239.5	431	357	351	44.0592	12.4463	30.0768	11.0913	63.347	13.2083	37.9401	10.3349	24.0507	8.55133	62.7545	12.7011	41.2341	11.2619	28.5407	8.46667	55.9755	11.9743	39.5547	10.6734	27.5199	8.97826	51.6469	11.4751	30.7382	8.83865	20.3313	7.87582	63.6693	19.35	31.6726	14.6422	69.015	9.15379	27.897	8.77026	13.5141	7.86671	66.1078	8.69556	26.0795	8.56181
HTH 1848	M	312.5	231	246	431	353	349	45.5854	13.8048	27.897	12.1147	61.7225	13.898	36.8549	11.2019	21.6748	8.64264	59.3516	13.2083	40.526	11.6021	26.0775	8.97467	53.1761	12.11	37.9341	11.1789	25.1701	8.97507	51.224	11.4454	30.3165	9.26007	17.572	8.09707	64.8949	21.8604	32.7906	16.8903	65.2277	9.7057	26.2603	9.50117	9.79868	8.26531	69.0417	9.18663	25.1872	8.61814
HTH 1876	M	337	256	279.5	462	390.5	382	46.2655	14.7322	30.8932	12.9041	67.4883	15.9284	44.7047	11.7699	26.5353	9.82133	67.1527	16.3415	50.1367	12.7003	32.8639	10.2478	60.5452	14.3177	46.913	12.403	31.497	9.9921	56.9822	14.1403	34.9699	9.18311	22.0995	8.57185	70.0441	23.2487	33.1894	17.1548	76.6155	11.8968	31.0768	10.1108	15.5807	9.92371	74.2731	9.92082	25.3176	9.06922
HTH 1897	M	332.5	252.5	274.5	474	401	378	45.128	13.9018	32.371	12.8124	69.4368	13.8017	42.8782	11.6852	26.4172	9.22906	69.0955	13.8173	47.6764	12.277	31.8753	9.31487	61.8114	12.6292	44.053	11.6243	30.6026	9.73998	57.0653	11.9527	35.0721	9.81732	22.783	8.12844	68.4643	23.0421	33.1155	16.5588	78.0588	10.6107	30.0577	8.48738	15.9446	7.02784	79.5078	9.94968	28.5452	8.47344
HTH 1907	M	329.5	235	257	433	352	336.5	44.123	14.663	29.3222	12.7071	66.2966	14.864	39.9641	12.6437	26.2167	9.86866	63.8569	14.4842	43.1841	12.9565	31.497	10.1656	58.5069	13.3797	40.221	12.5332	29.7239	10.0842	53.0013	13.2148	32.7901	10.5945	22.2905	9.24768	62.4958	23.1245	30.4123	16.5726	69.1745	12.1073	28.0078	10.6801	13.9111	9.30448	66.4677	10.0927	26.0015	10.6683
HTH 1923	M	336.5	267	284	481.5	405.5	397	44.4822	15.7081	31.6097	14.4644	71.2119	14.9016	43.0347	12.6256	25.7387	9.9921	69.5155	14.7614	49.1914	13.3024	32.1743	10.9548	62.6542	13.7327	45.1591	12.4538	30.6512	10.7557	58.3363	13.2083	35.5604	10.6269	22.3522	9.50117	69.3607	23.9965	40.0022	18.5598	83.649	11.6597	33.2809	10.7796	14.9484	9.53243	78.6188	10.6808	30.4918	10.0938
HTH 1925	F	303	227	244.5	415.5	332	331.5	43.0137	12.4463	27.2648	11.0226	64.202	12.7847	36.9962	10.9956	21.265	8.46709	64.0223	13.1236	41.7407	11.2147	26.3315	8.9045	56.9897	11.9392	39.633	11.1362	26.774	9.15379	53.5099	11.5996	30.8205	9.54933	19.3025	7.83796	61.1068	18.4668	29.7191	14.061	68.3562	9.58567	24.8125	8.35931	8.58522	8.57436	63.6638	8.43613	23.4602	8.0718
HTH 1926	M	328	241.5	260	453	413	408	46.4125	15.2016	31.2461	13.3059	64.966	14.3087	39.6273	12.1121	23.8814	9.65534	64.3647	13.8856	42.437	12.7872	28.0431	10.1632	57.2623	12.6156	41.5714	12.403	27.4404	10.2949	53.0014	12.6383	33.783	10.2737	21.1311	9.31372	71.0404	23.3732	38.5443	16.2882	77.7999	11.7881	32.2581	10.1952	9.86358	9.89876	70.5736	9.69239	28.142	9.4239
HTH 1949	F	313	249.5	265.5	463	388.5	372	47.0303	13.7254	31.0986	11.6105	69.1828	14.558	43.7963	11.3986	24.7472	8.8904	68.3273	13.8007	48.6023	12.4486	31.5817	9.73998	60.6219	12.3848	43.3679	11.3873	29.3069	9.31372	56.3883	11.5755	34.4644	9.43188	18.2083	8.93865	66.9847	20.5145	33.4952	15.6017	76.6325	9.23488	30.4071	8.59315	10.7316	7.72743	72.8441	7.54722	21.2945	7.44778
HTH 1957	M	333.5	261.5	277.5	484.5	390.5	379	47.7443	14.061	35.3064	12.7892	66.7279	13.4631	44.0014	11.3532	27.6025	9.31949	63.8513	14.2243	48.7683	11.5159	32.5368	9.56883	58.2143	12.6165	44.2807	11.0942	31.3491	9.82717	54.0184	11.8561	35.8176	9.11613	23.7091	8.48189	67.8182	19.6815	37.4388	15.1655	71.3656	9.90745	28.6725	9.06566	15.4131	7.34065	66.7305	9.10314	27.0935	7.37378
HTH 1969	F	299	233	251.5	426	338.5	330.5	45.4231	12.9717	30.8563	12.1073	62.5689	12.6179	41.2914	10.3325	23.6044	8.85445	63.4181	13.0389	46.9835	11.2686	28.7031	9.65349	54.6124	11.6105	43.6037	10.8373	27.9412	9.58081	49.4454	11.184	34.7989	9.23488	20.5728	8.39396	66.0605	20.253	31.2438	16.013	69.0501	9.22906	28.7231	8.41657	8.27527	7.98968	65.9482	8.80085	27.2648	8.15617
HTH 1973	F	292.5	217.5	237.5	396	340.5	326	42.0523	12.192	29.3871	11.5993	64.2821	12.7025	37.4227	9.91179	21.7593	8.05046	62.6554	12.6179	42.1947	10.3325	25.1575	8.46667	54.8646	11.5993	39.9071	10.5017	24.6451	8.38243	50.8035	10.7796	31.6875	9.03437	18.4581	7.53533	62.8478	20.2355	30.4875	14.6512	71.2059	9.4041	26.8441	8.56641	12.6153	7.81185	67.0603	8.18118	24.68	8.30252
HTH 1978	F	301.5	230.5	252	406	354.5	345	45.2123	12.9676	30.2261	11.1763	68.1571	13.2083	39.6471	10.2461	24.2241	7.96587	67.146	12.6199	43.9214	10.668	29.0722	7.87582	59.0976	11.6145	41.0721	10.2026	28.3633	8.05936	54.1867	10.758	32.0152	8.38884	20.6614	6.94318	66.364	19.7017	33.1479	14.6473	77.8091	9.90636	26.3971	8.83865	11.1789	7.6767	71.0971	8.30813	24.5679	7.96047
HTH 1979	M	363.5	278.5	298	522.5	422.5	412	51.1471	16.51	37.0055	13.0034	69.4271	15.4114	44.6329	12.291	27.2638	10.1773	67.9031	15.1612	50.1245	13.208	33.3625	10.774	62.1583	14.0547	47.1594	12.7552	31.4186	10.6764	56.8966	14.1396	37.1965	9.84248	22.5005	9.31487	71.1346	24.7632	40.3036	18.3822	81.4077	11.4259	33.0678	10.754	16.1201	9.78074	78.2654	10.8839	31.2535	9.82279
HTH 1980	M	297.5	216.5	233	398.5	313.5	312	42.3524	13.6313	29.9731	12.023	59.3543	13.0431	37.8646	10.9272	22.6218	8.63642	57.4315	12.7849	41.3953	11.5996	27.6268	9.31949	53.0866	11.5996	37.9322	10.5864	26.2534	8.81998	50.1252	12.718	31.1573	9.4041	18.639	8.43358	59.2959	20.2997	29.4438	14.5178	67.1988	9.77341	26.7237	8.30122	9.66128	7.36649	62.9434	9.35978	24.2267	7.95912
HTH 1994	M	334	265	278	467	397.5	381	44.8913	14.5637	35.0546	12.5352	69.5489	15.5023	46.259	11.3321	29.8608	9.87375	69.6815	15.5787	51.4784	12.7858	35.2336	10.5328	62.4201	14.5715	48.1301	12.2026	34.6462	10.0842	58.8911	12.7282	38.0365	9.89767	25.3664	9.14557	68.1076	21.3402	37.5089	14.9073	79.9125	10.6808	31.082	9.49626	15.2799	8.66955	70.555	9.28134	28.9803	8.63766
HTH 1996	M	328.5	257	283.5	473.5	388	374	47.0205	15.4282	31.2926	13.4297	69.1204	15.3249	41.9245	12.0587	24.111	9.57894	67.065	14.4641	46.4252	12.7003	29.2948	10.3307	60.2001	13.0455	44.1126	12.5607	29.0412	10.4154	55.118	13.8755	35.5682	10.8294	21.7674	9.49211	67.5916	23.9193	33.6153	18.8966	77.0467	10.8403	29.8031	9.3168	14.1396	8.5551	75.6109	10.472	27.4321	8.56641
HTH 2704	F	302	226.5	242.5	426.5	377	355.5	42.8936	13.0411	30.3732	11.2864	59.4375	12.2813	38.1179	10.5328	23.3804	8.57812	60.9038	12.0468	42.4188	11.103	27.6013	8.64264	53.5964	10.8773	39.6273	10.6242	26.0841	8.40293	48.012	10.0927	30.1456	8.56181	17.916	7.22103	65.7758	21.0219	34.1715	15.8896	75.7149	9.92913	29.5837	9.79868	13.2408	8.47048	73.345	8.8904	27.4897	8.61148
HTH 2713	F	320.5	230	246.5	461	371.5	361.5	42.7809	12.0253	29.5034	11.515	62.4841	12.1923	38.4923	10.8403	22.9053	8.57185	63.4565	12.4463	41.741	11.1763	27.4478	9.00696	54.8646	11.6071	39.8258	10.6495	27.1018	9.48267	51.9871	11.8582	32.3498	9.66536	19.4882	7.45499	66.0856	20.7148	31.1615	16.5154	70.2121	9.8217	27.1845	8.38371	11.7735	7.79347	68.301	7.80083	24.3325	8.38157
HTH 2743	M	330	257.5	281.5	483	392.5	380	46.5193	15.24	31.2678	14.3097	69.4516	13.1277	43.692	12.118	25.5122	10.1952	71.2087	14.1821	49.2077	13.297	32.2608	11.0942	64.9518	12.7984	46.9531	12.0729	30.8383	9.90636	58.8434	11.4363	37.5349	10.1776	22.2673	9.23837	67.7452	22.6662	36.8309	17.7473	79.0938	10.1614	32.262	10.5918	15.5023	9.40753	76.2943	8.95107	29.1255	9.7635
HTH 2781	M	316.5	239.5	262	433.5	367	349.5	45.1388	14.3996	28.4727	13.5218	70.5438	13.4687	39.6208	11.6852	22.9107	9.45276	68.4209	13.6408	45.722	12.446	29.0451	10.2618	60.706	13.0389	42.4518	11.9152	28.0616	9.90926	56.5698	13.2091	34.6288	9.84466	21.0112	8.809	63.3077	21.3367	31.3295	18.5348	73.9233	10.0842	29.1332	9.06922	14.8515	8.91577	71.0386	9.9921	27.977	8.96668
HTH 2802	F	306.5	232	247.5	440	366	355.5	42.5034	13.0246	29.8557	11.5003	62.1566	13.9741	39.2303	10.3574	22.7008	8.39268	61.8997	12.8871	43.0954	11.261	28.2002	8.72067	56.0525	12.1121	40.7247	10.4264	26.8405	8.63642	51.1393	13.2254	33.0514	8.99421	20.4979	8.04378	61.2985	19.1573	31.1946	15.5844	71.2911	9.82133	27.3521	8.0718	9.73814	7.88128	64.9719	8.04378	26.7595	8.21398
HTH 2827	F	307.5	235	251	420.5	359	350.5	48.1176	13.6355	32.7906	12.0253	67.7469	13.2083	43.6152	11.1458	25.7388	8.9045	66.8063	13.0431	48.5158	11.6852	30.5477	8.89645	61.5044	11.5159	44.6233	11.1004	29.3186	9.00696	57.663	11.0096	34.9724	9.64791	22.1764	7.84481	64.6055	20.4748	33.9855	15.7755	70.472	8.29733	29.5488	8.80574	15.7373	7.75475	69.9584	7.44778	27.2691	9.06566
HTH 2829	M	360	279.5	299.5	519	430.5	420	49.1949	15.4103	33.0514	13.0661	67.0819	15.86	42.1011	11.5458	24.3388	9.75873	68.3286	15.4089	47.936	12.0227	31.0728	10.6764	59.4679	13.717	45.994	11.8282	31.0953	10.4154	56.5614	13.9225	36.1562	10.3878	23.5428	9.23216	73.3262	22.9657	36.4949	17.9621	80.7093	11.9623	31.3323	9.57669	15.3247	8.63766	75.6647	10.5348	27.6861	8.83865
HTH 2830	F	309.5	237	249	460	380.5	367	42.2793	13.1302	28.1945	11.2329	66.2147	13.0431	39.8838	9.88282	20.9973	8.128	65.7018	13.4663	45.3005	10.9223	26.758	8.80574	58.6814	12.3755	42.0032	10.1551	25.4001	8.55301	52.1591	10.753	31.7528	8.05046	16.1722	7.04007	64.1829	18.9655	30.6535	15.3583	74.3468	8.30424	26.6658	8.38157	8.85445	7.88855	72.281	8.46836	24.6932	7.57282
HTH 2831	M	349	259	276.5	457	384	371.5	43.5397	13.9703	30.3628	13.8321	66.6464	14.5747	41.4605	11.9812	25.0811	10.2107	66.0409	14.2806	46.269	12.2813	30.8187	10.922	58.3354	12.9565	42.5034	11.7146	28.3633	10.6734	54.9487	12.5718	33.2809	9.25349	19.6456	10.2573	67.5795	22.6252	34.2909	18.3072	74.2621	11.0917	29.3969	9.65794	15.8408	8.82526	67.8617	9.19131	26.6766	9.26742
HTH 2837	F	302	230	251	433.5	366	353.5	42.4248	13.479	30.4805	12.1073	63.9584	14.0557	40.028	10.761	23.2382	8.65631	65.5427	13.6355	45.1731	11.7281	28.8713	9.06566	58.0017	12.3003	42.0916	11.1638	27.8558	9.06566	50.8917	11.2686	33.5895	9.52077	21.538	8.15617	62.5756	19.0265	34.5477	15.7489	72.7152	8.8904	27.9405	8.91577	13.9826	7.56571	66.0663	8.33397	26.0808	8.88476
HTH 2838	F	308.5	229.5	245.5	448.5	362.5	357.5	43.89	13.4716	30.6691	11.7796	67.0774	13.971	40.8291	10.6693	24.2184	8.13505	65.532	13.0562	45.2967	11.2991	29.8875	8.81998	58.857	11.684	42.6728	10.9485	28.9684	8.65093	53.6021	10.8492	33.8667	9.29407	21.4031	7.74226	63.601	20.2608	32.8987	14.071	72.4787	9.144	27.4321	8.98105	12.9609	7.45115	68.9127	9.16006	24.4687	7.99506
HTH 2845	F	295	233	252.5	449.5	376.5	369	41.9552	12.531	27.6305	11.5399	61.2599	13.3271	39.0188	11.1236	22.9486	8.89161	61.2702	12.6437	43.5661	11.3456	27.9432	9.23022	54.2131	11.43	39.6566	10.5205	25.6562	8.55175	50.0792	11.435	31.2461	8.83824	18.6269	7.62423	61.2992	20.0844	27.9405	15.3361	67.9937	10.0981	26.8655	9.56771	10.943	8.80574	63.9772	8.71697	23.9631	8.49372
HTH 2848	F	318.5	246.5	260	454	392	377	40.8941	13.3816	29.464	11.7146	63.8407	14.3109	38.5416	10.8377	22.3983	8.77026	63.6991	13.7163	42.8427	11.2658	27.0933	8.97626	54.1867	13.0411	41.5717	11.281	27.0099	9.39838	50.905	12.1121	31.235	8.9045	18.5468	8.5551	63.8728	20.2706	32.871	15.0757	72.9515	9.1581	26.016	8.96668	12.7917	7.70653	69.7754	8.72108	23.9246	8.49372
HTH 2851	M	330.5	239	260.5	471.5	382.5	390.5	43.6962	14.9035	30.6498	13.2994	65.7967	14.0355	40.471	11.8536	24.6707	9.82279	64.8688	13.6408	45.8047	12.7984	30.4029	9.99963	57.404	12.8763	42.672	11.7357	29.1298	10.4987	54.6116	12.3964	34.207	9.58081	19.4824	8.50889	68.5163	22.0452	34.7184	18.1976	79.4472	10.1952	32.767	10.1264	15.0728	8.04378	74.999	10.025	30.5101	9.66128
HTH 2863	M	335	248.5	270.5	469.5	387	371	48.1814	14.3089	33.1894	13.4623	67.9916	15.2235	42.7668	12.3119	25.9949	9.48418	66.042	14.3577	48.3592	13.0486	32.5438	9.71455	58.4995	13.208	45.214	12.7521	31.1988	9.66128	53.519	12.7138	35.7694	10.6925	22.842	8.65093	68.7581	23.0015	36.3245	18.336	78.0722	12.0054	31.7951	9.83045	14.6042	8.02326	75.7996	10.9246	29.464	10.0981
HTH 2880	F	318.5	252.5	267.5	421.5	364.5	353.5	48.5158	13.7372	33.8734	11.3453	72.9827	13.1236	44.889	10.513	25.7437	8.2131	71.3741	13.5636	50.0612	11.2635	31.6845	9.15027	62.8241	11.5594	46.2308	10.5477	29.2223	8.80574	58.425	11.9812	35.6978	8.21398	20.6034	8.04378	65.1721	19.2335	32.7699	14.8285	77.0617	10.3297	29.8917	8.81998	12.9816	8.30424	75.7454	9.21001	28.1277	8.636
HTH 2884	F	291	201	220	420.5	339.5	326	40.3121	11.0965	27.0152	9.99963	58.1085	11.6043	34.9674	9.82717	19.9815	7.79669	55.7251	11.1072	39.2945	10.436	24.2993	8.47344	50.1348	10.16	36.9194	9.59763	22.7767	8.04333	46.4382	9.73814	29.5608	7.77137	16.1733	7.37378	60.8473	17.3319	29.0438	12.9676	65.9196	8.74693	25.0626	7.65801	12.2767	7.20463	60.5592	7.53153	23.2042	7.2369
HTH 2895	F	313.5	231.5	249.25	423	363.25	351.25	41.0721	12.7045	29.721	11.4454	65.2846	12.3613	40.4708	10.4171	23.0295	8.21659	64.6074	12.8763	44.9899	11.1773	27.6025	8.64637	57.7	11.0067	41.9968	10.2391	25.9115	8.13902	52.676	11.5224	32.3481	8.67162	18.9178	7.39708	63.7671	19.8127	29.212	14.6473	73.2367	9.82279	28.3633	8.51774	13.3024	7.70513	72.6408	9.41477	25.9092	8.81998
HTH 2920	F	291.5	214.5	228.5	404.5	324.5	314	38.8181	12.1218	25.7437	10.753	55.2033	12.0334	32.8987	9.8217	20.1571	8.21659	54.4449	12.023	37.6904	10.1688	24.384	8.56181	49.0484	10.4143	34.7398	9.71455	23.1537	8.47048	45.4524	10.7086	27.6305	8.11829	16.6001	7.96047	55.684	19.1354	27.3852	15.4977	63.1913	9.74255	24.4974	8.47048	13.3905	8.23402	62.8079	8.15617	22.6466	8.25619
	Count	48	48	48	48	48	48	48	48	48	48	48	48	48	48	48	48	48	48	48	48	48	48	48	48	48	48	48	48	48	48	48	48	48	48	48	48	48	48	48	48	48	48	48	48	48	48	48	48
	Avg	316.141	239.891	257.974	445.469	371.031	359.911	44.3379	13.6413	30.6142	12.0464	65.1855	13.7538	40.4545	11.0942	24.0447	8.92722	64.6766	13.5575	45.15	11.7332	29.4341	9.37912	57.5543	12.3974	42.2549	11.1779	28.2387	9.30757	53.4379	11.9388	33.4166	9.27833	20.5642	8.26461	65.1191	20.7215	32.9086	15.8331	73.108	10.1139	28.6236	9.08828	13.0503	8.23129	69.7416	9.00679	26.357	8.54503
	SD	18.2942	17.7274	18.5374	28.2104	26.4693	25.5584	2.80968	1.18549	2.52465	1.06555	3.96323	1.07177	2.99484	0.810893	2.12029	0.720674	4.35217	1.08873	3.55304	0.924618	2.66434	0.860374	3.75445	1.07239	3.15124	0.888476	2.58317	0.817674	3.89493	1.17405	2.54854	0.847804	2.43926	0.802847	4.25359	1.82866	3.39873	1.54186	5.17994	1.02082	2.90006	0.821089	2.44734	0.74192	5.19136	1.07701	2.56433	0.867443
	Var	334.678	314.26	343.634	795.826	700.624	653.233	7.89431	1.4054	6.37385	1.1354	15.7072	1.14869	8.96909	0.657548	4.49565	0.519371	18.9414	1.18534	12.6241	0.854918	7.09873	0.740243	14.0959	1.15003	9.9303	0.78939	6.67274	0.668591	15.1705	1.37838	6.49506	0.718771	5.94998	0.644563	18.093	3.34401	11.5513	2.37732	26.8317	1.04206	8.41035	0.674188	5.98949	0.550446	26.9502	1.15995	6.57578	0.752458
Female	29
Male	19
[truncated: 14 more columns]

## Sheet: Pan troglodytes
Specimen	Sex	Humerus	Radius	Ulna	Femur	Tibia	Fibula	MC1L	MC1W	PP1L	PP1W	MC2L	MC2W	PP2L	PP2W	MP2L	MP2W	MC3L	MC3W	PP3L	PP3W	MP3L	MP3W	MC4L	MC4W	PP4L	PP4W	MP4L	MP4W	MC5L	MC5W	PP5L	PP5W	MP5L	MP5W	MT1L	MT1W	FPP1L	FPP1W	MT2L	MT2W	FFPP2L	FFPP2W	FMP2L	FMP2W	MT3L	MT3W	FPP3L	FPP3W
CAM I 147	F	277.5	236.5	258	259.5	224	201.5	37.5455	8.30122	25.4361	7.56571	77.47	11.103	46.7363	9.82717	29.3007	7.88537	77.1464	12.11	55.3866	13.0609	39.5451	9.65534	73.0681	11.4413	51.0034	10.9688	37.0055	8.89645	69.2592	8.63642	38.8989	8.23751	24.8248	6.77386	51.2149	13.6526	28.2787	10.9272	63.2194	8.98903	33.9619	7.53961	16.0056	6.53306	59.9455	9.50117	39.0372	8.47048
CAM I 203	F	300.5	285	294.5	289	249.5	232	39.883	8.90007	23.7951	7.70653	90.0968	12.1923	51.229	9.85085	31.4227	8.38585	86.4898	13.8895	61.9169	12.1923	44.9609	9.57333	81.3647	12.9551	56.819	11.5346	40.2816	9.50117	75.4517	9.08462	42.5034	8.30252	25.9939	7.45259	57.9989	16.854	28.6419	11.281	77.2385	10.761	39.9659	8.63973	18.3729	7.46268	75.1888	11.3466	45.4888	9.65237
CAM I 206	M	308.5	285.5	300	300.5	256.5	235.5	42.1743	8.35931	26.5865	7.79347	90.6076	12.3119	47.4569	10.8387	32.6831	9.24768	89.2503	13.2104	56.5583	13.0609	43.2747	9.65237	85.4454	11.7699	52.9222	11.6145	39.9628	9.58567	80.3491	8.63973	40.2189	8.22357	28.3633	7.77137	57.7432	15.522	28.0865	11.5458	72.3252	9.53694	34.7199	8.47048	19.2201	7.87446	70.8016	8.97826	39.203	8.80696
CAM II 301	F	306	274.5	287.5	296	246	220.5	42.1284	7.96992	25.9148	7.2369	87.9701	11.4997	46.9907	10.3297	31.7501	8.05447	86.7205	12.6131	54.7057	12.3639	41.4909	9.62113	80.6927	11.6302	50.5773	11.2607	39.7941	9.15379	71.9239	8.80696	38.8624	8.07225	27.8709	7.11402	56.1432	14.767	28.8733	10.8456	69.1229	8.65631	32.794	6.5391	17.3641	6.07066	66.6663	7.88628	37.4472	7.65801
HTB 1056	M	321.5	299.5	313	327.5	275	254.5	42.4199	10.3515	26.5353	8.63973	95.4289	12.5332	52.5131	10.3325	30.933	9.00576	92.0426	13.3382	62.2328	13.717	42.2704	10.8373	88.6464	12.3903	58.9827	12.2416	39.9778	10.1727	80.7174	9.05973	44.7938	9.82717	28.2067	8.00358	60.1193	17.4957	30.3225	12.9676	79.3372	10.671	38.696	8.89363	19.0517	7.91939	76.3016	10.4291	45.1591	9.14439
HTB 1718	M	300.5	288	303	310.5	249.5	227	42.9069	9.24264	26.9401	7.26803	94.9168	12.284	49.3927	9.80855	29.9018	8.06514	91.9321	12.6165	59.3514	12.3616	42.0794	8.80696	90.6092	12.531	57.0716	11.1965	40.1328	8.46709	82.735	9.73519	43.4343	8.809	27.5387	7.05228	57.743	15.0013	28.3111	11.695	72.5606	10.2194	34.9699	7.36795	18.4668	6.96174	70.8661	10.6764	41.5756	8.72067
HTB 1719	F	298	274	291.5	294.5	260	234.5	38.2151	8.12844	23.6476	6.7532	79.4202	11.2147	45.214	9.74255	28.6205	7.78979	81.7286	12.6224	55.3039	11.9383	37.8555	9.40143	77.3858	11.176	51.5845	11.4829	35.2315	8.46667	72.7327	8.95788	40.6404	8.56181	26.2501	7.02937	52.1361	14.5627	27.012	9.93526	65.4474	9.34445	33.5797	7.28133	16.9505	6.71487	63.5002	9.55646	38.7796	8.13197
HTB 1721	F	276.5	249	263	272.5	236.5	215	41.2024	8.21659	24.3583	7.11402	84.3282	10.6693	45.994	9.31333	29.8893	7.64301	83.0122	11.6852	55.0339	11.5993	40.8164	8.98903	78.413	11.1789	49.8808	10.4154	35.9012	7.95867	71.9794	7.71629	39.7087	7.79669	24.7263	6.37029	56.4947	13.2994	27.6015	10.245	66.96	8.50889	34.1211	7.4742	17.4446	6.51933	64.8949	9.01531	38.8732	7.95912
HTB 1726	M	337.5	287	304	309	263	238.5	42.1858	9.85776	26.8427	8.48738	87.4607	12.9609	47.5224	11.103	32.2651	9.37815	84.5928	13.2929	54.11	12.291	40.0496	9.906	83.8284	12.7138	50.7358	11.6687	38.0156	10.2949	79.349	10.6693	42.1611	9.74697	30.5689	7.62752	62.4444	17.6109	30.5876	12.6179	74.299	10.9115	37.6057	8.65093	17.9591	8.39738	72.136	10.5999	42.7708	9.32718
HTB 1735	F	296	280.5	295	300	263	237.5	40.929	9.18311	26.1621	7.80588	81.8868	12.0729	47.6721	9.99389	31.6633	8.30424	80.0477	12.7858	56.8123	12.1076	42.7668	9.85085	76.4542	11.3466	53.2635	11.0184	40.1377	8.72888	75.2767	9.90926	40.9028	8.56181	28.6173	6.96123	55.4033	15.4942	28.0267	11.5996	69.2257	9.20183	34.2761	7.96047	16.9437	7.02937	66.466	9.40143	40.4715	8.46667
HTB 1745	M	299.5	219	266.5	300.5	250.5	226.5	37.7314	9.41172	23.5471	7.74226	85.26	11.5159	48.2636	10.3878	31.6709	7.80083	83.2895	12.9551	56.897	12.291	41.4021	9.144	79.3979	11.3466	55.2897	11.1304	37.6862	8.38371	69.3797	9.144	39.3183	8.23533	26.5028	6.72287	52.3257	16.0887	29.3007	11.0994	67.5776	10.9302	33.7824	7.04007	19.053	6.77545	65.7022	9.906	39.1292	7.89037
HTB 1749	F	315	288	302	320	269	242	41.8308	9.36859	25.5762	7.63691	82.2225	11.8545	47.5827	9.99103	29.8875	7.96992	78.0638	12.5592	56.4727	12.0274	41.5818	9.65237	76.7286	11.4328	52.3251	10.9561	38.6081	9.08462	72.3078	10.081	41.7334	8.87184	29.2307	7.26803	57.4949	16.1733	27.3206	11.2619	66.8196	10.0082	37.7617	8.21965	22.4392	7.53961	64.6575	9.58081	37.6927	8.04734
HTB 1880	F	296.5	289	298.5	308	264.5	242.5	40.2274	11.0119	25.8301	8.81184	92.2943	12.4506	49.7944	11.007	30.9954	7.874	90.2624	12.6497	59.9441	12.7045	42.0815	9.74587	81.7035	12.0824	56.5224	12.081	38.4402	9.40143	82.3808	9.70533	43.9423	9.1177	27.5167	7.29363	57.9997	17.0199	30.6498	12.7011	75.0378	10.5041	38.7002	7.53961	15.8327	7.28183	73.5755	10.4171	44.4581	8.89
HTB 1882	F	317	280.5	299	305.5	266.5	235.5	40.2317	7.54722	19.304	8.73094	84.5847	12.8074	49.4688	10.499	34.67	8.72724	83.2275	13.8918	59.8711	12.8738	45.3195	9.74587	82.497	12.7633	55.0334	11.7723	42.2488	9.33793	75.5239	9.48871	42.8895	8.32881	30.229	7.93928	58.8814	16.6163	29.8374	11.2763	69.307	9.53694	36.844	7.70467	20.0705	7.28921	69.5122	9.85776	42.8443	9.14439
HTB 2771	F	297.5	261	282.5	301	247	228	38.2702	7.22847	21.3375	7.02784	84.7585	11.1236	50.8138	10.0842	33.6127	7.89037	84.0139	11.7991	57.7628	11.7146	44.7967	8.72436	78.6599	10.414	54.3476	10.9325	42.5081	8.18118	74.8455	7.99506	41.4747	8.35802	29.5564	6.77386	52.0955	13.3024	27.8658	11.3321	64.3512	9.30332	35.5722	7.28035	18.6269	6.54622	62.6001	8.382	39.716	8.37002
M 148	F	308	269	284	298	250	229	38.8882	8.89645	25.9218	7.34065	90.8521	12.277	50.7358	10.8456	32.0927	8.63642	85.4664	13.2123	58.929	12.8718	43.0247	9.652	83.8262	11.938	54.7859	11.2794	39.7933	9.33217	74.1854	9.22867	41.7822	9.00019	27.6943	7.29363	57.964	16.1822	28.7887	11.8545	73.357	9.93887	36.6631	8.2131	13.462	7.02784	69.3648	9.88282	40.8996	8.89645
M 155	F	291.5	265.5	281.5	283.5	248	230	40.1507	8.38157	26.5887	7.0599	82.2995	11.3835	49.8326	9.26007	31.6694	7.28183	81.6399	11.3504	57.4937	10.7557	41.264	8.5551	80.0154	10.9223	54.1867	9.68906	37.8484	8.09707	75.0147	8.636	41.0857	7.54437	26.9373	6.61268	55.1368	13.5477	29.326	10.1041	69.1603	8.70133	37.2611	8.08777	15.5787	6.94731	66.5636	8.66955	40.1521	7.3835
M 158	F	284.5	244.5	258	275.5	232.5	209	40.1333	9.66128	26.9943	8.04734	85.0064	11.6043	45.5507	10.436	31.2493	8.12844	81.5499	12.6199	55.2105	12.2953	40.9112	9.40143	78.9956	10.943	50.7188	10.8089	37.1876	8.55301	73.5812	9.39838	39.3117	8.61814	27.2711	7.28576	55.0386	15.4103	29.3837	11.1789	69.2871	10.4634	35.0529	7.2463	18.3039	6.63054	66.6392	9.15379	38.2694	8.21267
M 172	F	302	275	291.5	298	245	226	38.9925	8.56641	27.8574	7.21457	89.2406	11.43	48.1843	9.652	31.163	7.73438	87.8098	12.3625	55.9647	11.5175	42.1762	9.65534	85.1829	11.5993	53.2705	10.6171	38.7774	8.1302	79.1679	9.56771	42.0896	8.04333	27.9412	6.79921	57.6035	14.479	29.2948	10.6734	70.084	9.47246	35.3907	6.44357	19.1438	6.18299	66.8025	9.18311	39.7956	7.53961
M 184	F	279	257.5	272	270	226	204	36.2943	7.70885	23.4528	6.70793	71.3158	10.9469	46.0227	8.64513	28.6205	7.02937	75.1482	11.3466	53.9329	10.499	37.2537	8.39268	73.5016	10.5918	51.3237	9.82462	34.3005	7.5586	69.0108	7.28133	38.7002	7.33039	24.5605	6.52153	51.0585	13.3314	26.1654	10.0881	60.568	9.19131	32.9441	6.27448	16.6813	6.09835	58.9417	8.80085	38.6139	7.03549
M 279	F	294	265	282	289	251.5	225.5	38.0047	9.56771	23.2062	8.74693	82.8165	12.1369	49.1073	10.8294	30.7434	8.73094	81.716	13.4687	56.819	12.7849	39.3774	10.5154	78.6599	11.7687	52.3251	11.6917	36.6889	9.79868	72.2219	10.6734	42.3388	8.91737	26.2632	7.81185	59.5216	16.6499	26.7709	11.4378	70.0202	10.4418	35.9842	8.21267	17.5334	6.01133	67.6873	10.9548	39.8838	9.56771
M 299	F	294	274.5	285	295	242	217	37.8911	7.78933	22.6913	6.80817	81.4568	10.5837	46.906	9.31372	26.8735	7.80083	78.6265	11.1763	55.1222	11.962	38.7777	8.89161	74.4222	10.5072	51.9864	10.7886	36.5823	8.55133	70.0624	8.73094	40.8983	7.90625	25.2319	6.43968	53.3403	14.061	26.4209	11.5196	66.5584	8.78455	35.4052	7.45067	15.3268	6.27448	62.5851	8.52278	39.8973	7.70885
M 401	M	320	291	304	308	259.5	239	42.6965	9.66536	25.7499	7.53724	91.5294	11.6843	49.196	10.5263	32.4291	7.97486	89.8984	13.0398	57.9195	12.6199	43.0174	9.39953	87.7363	12.7025	56.2187	11.7836	41.0804	9.398	78.486	9.82279	43.011	9.18663	24.13	8.21659	55.9169	16.3584	26.1687	11.5147	75.0027	10.364	33.3974	7.87446	16.9545	7.12459	71.887	10.0082	40.6414	8.5551
M 440	M	291	269	280.5	282	240.5	215	37.2595	8.57185	19.9959	7.54294	83.913	11.6843	42.355	9.77341	27.2632	8.13197	84.7799	13.384	52.1553	13.3776	36.9365	9.57669	80.2647	11.6021	48.7681	11.2479	34.8006	8.72436	73.6649	9.37815	37.8461	8.86375	22.6218	7.79669	53.7764	15.1591	25.5968	12.0253	68.1584	10.6269	32.4273	7.45259	17.6139	6.43467	67.3381	9.86358	37.084	8.98903
M 450	F	295	270	282	264	251.5	226	41.3632	9.48871	27.0092	8.76167	85.599	12.8794	47.7647	10.9861	30.3149	7.91939	82.6354	13.2104	55.5429	12.1121	40.729	9.23488	80.3648	12.531	52.0706	11.6105	39.0405	8.65631	72.0574	10.0785	41.6563	8.72724	27.4321	7.1125	56.6426	14.9554	29.9989	11.695	69.5979	10.6801	35.2543	7.63175	17.1161	6.57408	64.7709	10.5	39.8194	7.95867
M 467	F	295	270	284	304	250	225	43.9486	10.4418	29.718	7.7214	90.6828	12.6131	55.9699	11.0119	35.8176	8.63642	89.4975	13.4225	63.9458	12.7948	47.5954	10.1727	84.6728	12.1076	59.1859	11.769	43.4347	9.66536	77.0467	9.48418	46.4827	9.41667	31.0075	8.04512	57.1218	16.7008	30.6722	13.143	71.7432	9.99103	40.3868	8.63642	20.9416	7.3835	70.5591	10.3349	46.0664	9.06566
M 475	F	297	274	290.5	291.5	243.5	224	41.287	9.05973	27.5199	7.96992	82.8971	11.5993	46.8207	9.82279	30.5689	7.78979	81.8301	12.531	55.0336	11.1763	41.8261	9.22906	80.608	11.8778	52.4142	10.267	38.7807	8.80574	74.9422	8.97507	39.4657	7.98968	26.0775	6.94731	56.0504	15.255	28.7025	11.4328	69.5221	9.84466	34.2393	7.78979	11.8899	6.96792	65.0507	9.32295	38.4596	10.9302
M 498	F	291.5	271	285.5	285	244	224	40.1971	8.89363	26.34	7.8781	84.1638	11.5299	51.2259	10.7647	30.5647	8.55133	84.3418	12.7071	59.8883	13.1244	41.1567	10.0881	79.5022	11.2686	55.8264	11.6437	37.1904	8.97507	73.7451	8.21441	41.1651	8.69556	25.7392	7.19716	53.938	16.3409	28.8185	11.9383	69.6022	9.31372	37.8506	7.53961	18.4622	6.77545	66.191	9.3168	41.8254	8.89363
M 501	F	294.5	265	283.5	284.5	240	218.5	37.1876	8.809	25.8322	7.45067	84.8371	11.3482	46.9066	9.48418	37.0855	9.15027	85.8921	12.7	55.1196	11.261	39.7264	9.39838	84.3323	11.3532	53.5265	10.5477	39.2862	9.85776	76.795	9.14439	41.0689	8.05936	30.1681	7.53581	53.1079	15.4114	27.3506	11.1763	70.9822	10.3463	34.151	7.79669	17.36	6.77809	69.5985	9.83665	41.3216	8.9045
M 506	F	321	302.5	319.5	315.5	266.5	244.5	39.0725	8.13197	25.6562	7.28133	88.9895	11.1763	48.6076	10.1952	32.6006	8.13197	85.8687	12.7849	58.6762	11.8545	42.9313	9.3168	84.4137	11.1773	54.9497	11.1789	41.3187	8.97826	78.0987	8.97826	43.9421	8.47344	30.229	7.1527	58.5754	15.4114	30.1757	11.3456	75.1947	9.38846	35.1403	7.53724	18.9882	6.68867	69.7033	9.26007	39.8784	7.87446
M 576	F	291.5	262	280.5	280.5	236	214.5	39.0244	8.49372	24.7263	6.94267	82.5528	11.8561	48.8739	9.82279	32.0131	7.62752	81.9617	12.9543	56.4064	11.3143	41.1703	8.38371	78.4864	11.8545	53.257	10.4634	38.4387	8.38585	76.8865	9.85085	41.2432	8.49076	28.5358	6.77809	54.0269	14.6483	27.7114	10.753	68.8442	10.1193	35.5157	7.11402	17.6125	6.18125	67.162	10.0511	41.6591	8.04512
M 655	F	328	291	310	310.5	266.5	237.5	42.1784	9.39953	26.3662	7.9807	92.7323	12.549	53.6829	10.6764	37.1688	8.8904	89.2798	13.6324	63.5883	13.2104	49.1067	9.8217	85.3467	12.0227	58.2832	11.6889	44.9715	8.55301	79.3356	9.91179	44.8798	9.34023	31.9306	7.30541	58.2557	15.6636	30.8216	11.1789	75.7824	9.85776	38.7108	7.82652	20.7449	6.96792	73.0769	11.2147	45.4915	9.06289
M 676	F	293	258.5	274	277.5	226	206	37.4343	7.45259	22.4636	7.05228	79.6778	9.99641	43.438	8.73094	27.6015	7.89627	77.9898	11.0942	51.9106	10.8274	38.9467	8.80533	73.5754	9.65349	49.0227	9.83045	35.5601	7.80083	68.7536	7.2833	34.8083	7.07815	22.9461	6.09835	53.3443	13.297	25.5699	10.6764	62.7403	8.05936	31.477	6.35226	12.954	5.84445	60.1477	8.32364	35.7415	8.05447
M 677	F	316.5	279.5	292.5	316.5	267.5	247.5	41.3454	9.06922	28.7624	7.98968	89.41	12.7011	52.5791	10.245	34.9028	8.29777	88.4767	13.387	62.2487	11.8835	45.3826	9.15027	85.6934	11.769	57.4091	11.1789	42.0794	8.55133	79.3356	9.82462	44.7926	8.77965	26.5007	7.36649	56.822	14.6495	30.0835	11.8561	72.6444	10.081	37.8461	7.46268	19.4851	6.60454	67.399	10.4226	41.6574	8.05046
M 712	M	301	275	290.5	300.5	246.5	216.5	42.0193	8.97467	27.606	7.96587	83.7353	12.1147	48.7892	10.2289	33.1064	8.57812	80.9415	12.8738	53.5148	12.4506	42.2488	9.65349	76.7929	11.3608	50.141	11.2199	38.0162	8.80696	72.6442	9.75469	40.9983	8.73422	29.6021	7.28921	55.5884	15.7516	30.151	11.0965	70.1948	10.0643	35.6463	7.87446	19.3042	6.86009	65.9556	9.78111	38.1004	9.06289
M 742	F	309.5	288	304.5	305	256	234.5	42.2704	9.75469	28.9571	8.57185	92.965	13.0007	45.6354	9.73814	30.3409	8.27527	89.5852	14.0913	62.663	12.1121	46.059	9.31487	86.8684	12.1967	57.0659	11.4751	41.3181	9.1757	82.0578	9.56733	43.6998	8.37002	27.5214	7.28183	63.6029	16.436	31.7152	11.8899	79.2014	11.0119	35.3206	7.19667	20.8342	6.94473	75.4701	10.6683	45.5661	8.80696
M 78	F	296	256.5	273.5	289	230	206	37.4977	8.29733	21.9301	7.64301	81.704	11.2619	45.7201	10.2478	28.1221	8.6774	77.5884	12.1923	55.881	12.6153	39.7144	10.3325	75.5229	11.0994	52.7647	10.9485	36.4082	9.48418	69.5962	9.31487	40.5557	8.38371	25.913	7.6767	54.5333	15.2485	26.5147	11.2221	66.6748	9.24264	33.8719	7.96587	17.3575	5.75733	65.2846	9.38579	39.203	8.38243
M 86	F	289.5	264.5	277.5	281	234.5	215.5	40.1225	9.398	26.7612	7.45115	81.5342	11.5147	48.6834	10.5837	29.3804	8.72436	79.7912	12.549	58.5224	12.3639	40.7261	9.652	75.4382	11.8561	54.1962	11.3769	39.0322	9.22906	68.1567	9.15379	41.3454	8.44038	27.6118	7.53724	55.7964	15.0716	29.21	11.769	64.2268	9.45124	33.7906	7.53581	17.6139	7.28576	63.7018	8.7416	39.6443	8.48738
M 988	M	304	282	296.5	304	253	225.5	39.7606	9.75469	24.1448	9.1581	85.2595	12.7849	51.4027	11.4328	32.9393	9.31487	85.9387	14.2243	60.373	12.7476	42.9261	10.5	81.2807	13.2123	56.5576	12.309	39.6417	9.90926	75.3743	10.5017	43.4448	10.3574	29.3892	8.05936	56.9066	16.5109	28.9803	11.9428	71.3885	11.0057	36.6631	8.636	19.6543	8.04333	70.1941	11.471	42.6721	9.82462
Z IX 52	F	286	270.5	284.5	280.5	236	216	37.2289	8.21267	21.6225	7.62752	80.8603	11.8545	44.6193	9.56733	26.338	7.96272	82.388	13.1244	50.8966	11.6302	34.8083	9.99067	77.9803	11.699	46.8513	10.2461	32.6021	8.40293	68.9438	8.69556	35.5636	8.05936	22.4445	7.112	55.7647	15.9182	26.0779	10.671	69.0949	9.48153	33.7847	7.62423	18.3005	5.92727	63.8455	9.7466	38.1024	8.57812
Z VI 34	M	303	281	298.5	285	251.5	229	37.1087	8.65631	24.0634	7.89037	84.4342	11.2147	47.8385	9.906	30.3996	8.12844	83.7477	12.4486	54.3561	11.2635	39.7934	9.39953	82.3814	11.0942	50.8057	10.4484	36.4049	8.62188	72.1539	8.63766	39.1687	7.97576	24.9837	6.94318	55.2884	15.4103	27.7708	11.6071	69.3439	8.6774	33.6136	7.20463	12.11	6.44802	69.4269	10.6801	38.3653	8.64637
Z VII 23	F	286.5	267	281.5	280.5	241	218	38.9953	8.47344	26.3449	7.8781	83.4886	11.5996	49.4025	10.3293	33.783	8.23402	82.8151	12.0253	56.9187	10.9272	42.9664	8.31847	80.01	11.9967	54.5333	11.7714	41.7428	9.15027	71.9738	9.49211	40.0796	8.9226	24.6473	7.80588	54.6989	15.2421	28.9982	11.4259	65.3693	9.39953	37.5097	8.80574	24.8281	7.70467	63.8468	9.68203	39.0313	8.63766
Z VII 25	M	319	299.5	317	315	271	247	44.2477	9.58567	28.3736	8.21659	89.8315	13.384	51.7324	10.5847	32.9407	10.1899	89.4927	15.4103	60.198	12.8871	44.2041	10.3297	86.9577	14.2966	56.9817	12.0987	42.1648	11.1378	83.0632	11.3456	44.7105	9.45124	30.2108	8.47767	62.2305	16.1009	34.4827	12.7948	74.4268	11.5224	37.9308	8.4654	19.7455	7.70467	71.6285	11.9743	44.1963	8.97626
Z VIII 10	F	302	269	285.5	295.5	255	229	41.656	8.809	29.3095	7.9807	91.1023	12.1499	54.527	10.8377	34.1216	8.73545	85.0927	13.2123	62.8323	12.2026	45.8921	9.31949	84.6667	11.769	58.766	11.7735	43.1073	9.15027	77.3855	9.74255	46.0615	9.13655	27.7712	8.38371	59.1012	16.0101	29.975	11.3709	71.9699	9.93526	37.2549	8.29733	18.3744	7.28576	71.3838	10.4987	43.8022	9.00019
	Count	44	44	44	44	44	44	44	44	44	44	44	44	44	44	44	44	44	44	44	44	44	44	44	44	44	44	44	44	44	44	44	44	44	44	44	44	44	44	44	44	44	44	44	44	44	44	44	44
	Avg	300.716	272.83	288.818	294.511	249.58	226.591	40.0486	8.88736	25.4041	7.74405	85.7635	11.8512	48.6081	10.1724	31.3973	8.2996	84.173	12.8308	57.3732	12.1761	41.8395	9.49449	80.9635	11.726	53.7398	11.1784	38.9439	8.97855	74.9535	9.27951	41.4472	8.57599	27.257	7.2963	56.2953	15.4244	28.6912	11.4253	70.0811	9.83049	35.6326	7.70797	17.9108	6.87216	67.6141	9.81334	40.6474	8.58662
	SD	13.3871	16.4642	14.3621	15.3325	12.9659	12.444	2.07984	0.824982	2.41034	0.605046	4.95666	0.725851	2.83962	0.624589	2.48034	0.605282	4.20108	0.843826	3.23942	0.747486	2.81473	0.579521	4.33471	0.814907	2.98779	0.647039	2.65108	0.708762	4.19322	0.834323	2.47863	0.651275	2.29902	0.549608	2.86405	1.13436	1.79195	0.723277	4.21985	0.788059	2.09327	0.646857	2.45542	0.62096	4.13165	0.902237	2.58905	0.714595
	Var	179.214	271.069	206.268	235.087	168.116	154.852	4.32572	0.680595	5.80976	0.366081	24.5685	0.526859	8.06344	0.390111	6.15208	0.366366	17.6491	0.712042	10.4939	0.558736	7.92273	0.335845	18.7897	0.664073	8.92689	0.418659	7.02823	0.502343	17.5831	0.696095	6.1436	0.42416	5.28547	0.302069	8.2028	1.28677	3.2111	0.52313	17.8072	0.621037	4.38179	0.418423	6.0291	0.385591	17.0705	0.814032	6.70319	0.510646
Female	33
Male	11
[truncated: 14 more columns]

## Sheet: Gorilla gorilla
Prox ID	Sex	Humerus	Radius	Ulna	Femur	Tibia	Fibula	MC1L	MC1W	PP1L	PP1W	MC2L	MC2W	PP2L	PP2W	MP2L	MP2W	MC3L	MC3W	PP3L	PP3W	MP3L	MP3W	MC4L	MC4W	PP4L	PP4W	MP4L	MP4W	MC5L	MC5W	PP5L	PP5W	MP5L	MP5W	MT1L	MT1W	FPP1L	FPP1W	MT2L	MT2W	FFPP2L	FFPP2W	FMP2L	FMP2W	MT3L	MT3W	FPP3L	FPP3W
Cam I 105	M	446.5	353	373	369.5	305	269.5	57.0704	14.9862	33.0878	11.4454	97.2534	17.4456	56.9011	13.2123	39.2081	11.5346	96.6065	17.7004	63.3606	15.8363	45.2184	13.2689	92.2979	16.1187	58.1722	14.3988	42.5881	12.4564	91.4213	15.5796	46.5208	12.3709	33.5367	10.5955	70.3666	19.8127	32.2768	14.8169	81.3653	12.6156	39.8225	10.5833	21.9301	9.06289	80.2739	12.2872	46.5679	11.6889
Cam I 106	M	455.5	371	394	391.5	328	285.5	61.0616	16.3461	31.6767	12.1313	102.487	19.2344	58.5086	14.8188	41.8284	13.297	100.671	20.9416	65.4482	17.785	50.562	15.2405	94.9177	18.3885	62.4123	16.6257	47.1631	14.2263	91.6629	16.3547	51.9856	13.3773	36.9244	11.8282	71.6965	19.9113	33.8676	17.0351	90.6338	12.9543	43.8577	11.3453	27.197	10.9692	87.7737	12.2813	49.5422	12.4644
Cam I 95	F	379	298	314.5	306	263	234.5	51.8244	13.6408	30.9909	9.93526	88.5904	15.923	50.3838	12.5866	33.9751	10.0757	89.8314	16.1846	55.8079	14.9977	41.0011	11.8536	85.6183	15.0792	53.0903	13.9225	39.2533	11.5312	82.4767	14.3447	45.9743	12.1189	32.4593	9.91179	60.5381	18.1195	28.5358	15.2421	74.6221	11.4588	37.0844	9.92913	20.4979	8.97626	76.4857	11.4002	41.1494	11.6917
HTB 1409	M	467	381.5	405	413	354.5	315	55.9498	14.5649	19.2612	10.6734	100.525	16.7649			39.7977	12.1085	101.872	17.8655	63.5915	16.6085	47.2443	13.2937	95.773	16.6813	60.5372	15.7081	43.8463	12.0655	89.2489	14.1517	49.333	12.5866	35.1735	10.7557	71.9727	17.8044	32.3537	15.8327	86.362	12.0253	43.1807	11.5993	25.5017	9.68906	83.3124	13.9703	47.7611	13.2994
HTB 1430	M	424	350.5	371.5	366.5	295.5	315	49.954	13.8009	26.5902	9.71455	93.4371	17.0651	49.6147	14.1403	32.9407	11.7146	92.0889	18.5437	57.5733	16.0902	40.2168	13.3776	88.7398	18.039	56.2264	15.9182	39.201	13.1408	88.3989	16.0291	45.2995	13.8941	30.9922	10.7086	62.5916	21.082	27.3789	16.505	83.4051	12.2064	37.6768	11.43	14.5627	10.605	80.7481	13.483	42.7708	12.8871
HTB 1431	M	426.5	345	365.5	380.5	302.5	260.5	55.2983	15.6237	31.1666	11.8835	92.9016	17.7477	54.8656	14.9016	35.5926	11.5147	92.1224	17.9621	59.9478	17.018	42.7755	13.3059	83.4824	15.4961	56.8991	16.1935	42.5889	13.6379	86.5077	13.0389	46.3377	12.7779	23.8457	9.23177	68.3412	20.27	30.2688	15.6457	79.1679	12.4486	39.1168	10.9381	27.9528	10.6683	75.7467	11.8545	43.8672	12.3964
HTB 1717	M	436.5	361.5	389.5	383	323.5	260.5	55.6425	14.7098	10.0497	11.3592	95.5887	16.3626	54.8055	13.4663	36.2398	11.261	100.683	17.6972	61.6383	16.0887	44.4529	13.0411	92.1523	15.923	59.6318	15.5789	42.7838	12.7948	88.6713	14.2363	49.7898	12.5023	33.9935	10.5477	69.3137	20.6649	33.3639	16.5109	87.3764	12.7872	41.8596	10.9223	21.1694	9.24264	85.7688	12.0417	46.0594	12.0253
HTB 1725	F	349	295	311.5	317	256.5	266	43.9519	11.695	24.8073	9.14557	75.6153	13.2351	43.61	11.1789	30.3277	9.69683	78.9942	14.8176	48.7753	13.3797	36.2943	11.9743	74.6469	13.297	46.0351	12.9543	33.7213	10.5399	69.0135	10.2618	38.5346	8.80574	27.6434	8.98026	54.4077	15.8336	25.5184	13.971	70.6608	11.112	32.3537	9.24264	17.7089	8.11829	67.7421	10.245	36.7969	10.6845
HTB 1733	M	470	374	392	394	318	266	51.6501	15.1563	30.591	11.5845	99.3608	19.062	53.3401	13.867	34.6291	11.769	100.755	20.6649	61.1303	16.7649	42.4221	13.0486	91.9546	18.8029	58.0017	15.7664	41.0916	12.623	90.3461	15.5787	45.4888	14.2132	33.1956	11.0109	65.4324	19.8974	31.0866	14.228	83.4798	13.0398	38.8776	11.5993	23.4679	9.39953	82.9806	12.5718	45.1623	12.6199
HTB 1754	M	452	364.5	381	383	314	289.5	51.8244	14.5666	30.6961	10.3297	96.899	17.7117	54.3613	14.3389	36.067	11.3419	98.6559	18.7962	60.1219	16.4273	40.9788	12.291	93.6413	16.7642	56.5665	15.5823	43.2766	13.3905	89.3446	15.1108	47.3324	13.2408	33.6213	12.309	66.1422	19.053	34.7996	15.7664	85.7029	12.9077	39.4269	10.761	19.4917	9.08462	80.4344	11.4751	43.0994	12.3639
HTB 1787	M	440	376.5	377	390	313	227.5	52.0725	14.2243	20.2806	9.23488	97.8402	17.1892	54.3561	12.7003	33.8059	10.5918	103.711	17.6972	61.4709	15.3256	42.5057	12.1932	95.9292	15.6654	58.4868	14.0672			92.6156	14.3089	47.3435	13.0455	32.5606	9.38273	65.4671	19.1438	31.3285	14.3087	86.36	13.716	42.0824	10.1688	22.1912	9.2438	81.28	12.7011	46.144	12.0301
HTB 1794	F	363	297	314	319.5	264.5	280	42.1011	11.8536	27.237	8.39738	81.8007	14.0549	45.6926	11.4829	31.8711	10.5017	80.1838	15.3249	51.7514	13.2091	38.7135	11.1773	76.2904	14.3127	48.6922	11.9022	36.8335	10.9115	69.8502	12.8395	39.5258	9.88282	30.1415	9.4041	53.0013	16.0922	27.6865	12.0274	69.1839	9.78074	33.529	8.80574	19.9032	7.53581	65.3627	8.87386	36.7462	9.652
HTB 1801	F	357.5	291	311	302.5	259	278.5	43.27	10.754	11.3769	9.16905	81.2494	13.2148			32.2714	9.4041	88.1859	15.179	52.241	13.7163	39.1252	11.3504	80.6703	14.228	47.8475	11.8642	35.9107	10.4987	75.623	12.4644	41.0916	10.3878	28.2155	8.75389	56.388	16.4622	26.5008	13.0411	72.1364	10.9485	34.6303	9.00696	20.8323	7.66689	69.6811	10.0497	39.2857	9.92371
HTB 1851	F	371	290.5	309.5	310.5	256	275	40.7395	10.2478	23.7453	10.2618	82.1742	14.5924	46.8357	12.118	30.2706	10.4291	80.8966	15.4282	53.436	14.9791	37.8484	11.7763	77.0973	14.3097	50.4733	13.898	35.5604	11.5259	78.8263	13.2773	39.7131	11.1811	28.4248	9.47246	54.1399	16.6052	22.5228	13.5636	72.2219	11.3456	34.7981	9.50117	19.1349	9.27554	70.0526	11.2607	38.7906	11.2763
HTB 1954	M	479.5	377.5	399	405	333.5	277	52.0102	15.0911	28.5328	11.515	96.0134	19.1493	55.8806	14.8176	35.3923	12.0655	97.8893	21.1953	60.8754	16.7693	45.382	13.8946	93.2186	19.0688	58.0819	16.3426	42.5048	13.2927	90.7044	15.5787	49.3991	12.8654	33.6144	10.1264	65.6595	20.6588	31.7518	15.5127	81.026	12.3718	41.3229	11.7088	22.6206	9.88282	77.3085	12.2793	45.4432	11.8609
HTB 1995	M	433.5	345.5	365.5	371.5	298.5	236	53.2771	12.7849	30.1432	11.8315	91.4404	18.4039	54.4414	14.6825	35.2004	13.3454	87.567	18.7115	59.7848	17.1027	42.4194	13.3059	87.2159	18.3005	57.3194	16.5102	40.5097	13.1694	89.1542	16.1769	48.6023	12.418	31.8727	10.4442	66.2269	19.6472	32.2864	16.8744	81.5553	13.3253	41.5727	10.9338	22.193	9.65349	80.1881	12.1652	44.9587	12.7849
HTB 2025	M	428			373.5	286.5	232.5	51.5626	14.3933	10.1353	10.8641	95.1677	18.0358	51.9051	14.8285	34.1312	12.1993	99.4783	19.6516	59.117	17.1035	42.503	12.8871	91.368	16.4288	55.7954	15.9398	39.5451	12.3686	87.5494	15.2485	45.9768	11.9488	29.8337	10.3781	64.7727	19.3889	30.5789	14.1457	78.5043	12.0334	39.2161	10.7527	21.6034	9.02286	81.6187	12.4644	44.0274	12.1946
HTB 2028	M	432	349	380	375	306.5	232.5	58.0823	16.91	31.1666	11.6883	93.8125	18.7035	52.4448	14.1963	33.1437	11.515	94.3076	19.3889	58.5052	17.1035	40.64	12.5652	93.304	17.6564	55.713	15.9984	38.3544	11.7281	85.94	14.9707	46.5864	14.2969	30.0586	9.88282	68.9091	21.4447	31.8711	17.1046	81.5384	15.0859	40.2175	11.769	19.3903	9.40143	81.0264	12.5538	44.7155	12.446
HTB 2739	M	463.5	367	385	393.5	317	228	56.1771	15.0944	29.82	11.8561	100.512	17.8889	56.1547	13.9687	34.8352	11.5755	100.185	19.3047	62.6536	17.4422	44.4822	13.2929	96.4353	18.6422	60.1155	16.6967	43.3576	13.4644	95.0045	16.1047	50.8849	13.6904	35.0444	10.7607	73.2626	21.0958	34.0364	16.4273	88.1823	13.5141	41.8275	10.8403	21.6912	9.58081	86.2768	13.0246	46.0052	12.6199
HTB 2741	M	487.5	394.5	417.5	413	353	295.5	61.4869	17.2082	30.8216	12.1661	109.14	19.4197	59.442	13.9513	37.7614	13.3196	108.318	20.0689	67.5776	16.9589	48.3507	14.5688	101.35	19.8974	64.9738	16.2701	45.1591	13.8134	96.5396	18.1679	52.7474	13.9751	34.2058	11.9886	72.063	21.3467	31.4132	17.0266	92.6262	14.3337	43.9308	9.92371	19.2865	9.87375	92.3031	14.0557	50.3906	12.2064
HTB 2787	F	360	286.5	309.5	309	255	266.5	43.3593	11.0897	23.0743	9.66276	79.5943	13.9358	42.0032	10.6925	26.1125	8.81998	82.1585	13.8946	48.0108	14.6593	27.6118	12.4264	77.6471	12.5718	45.658	12.7911	30.3996	10.5477	74.2585	11.3504	37.0183	10.2194	23.3577	8.35931	57.6881	16.9342	24.5679	13.6355	71.1232	11.1072	32.4283	9.14753	15.0716	8.12976	71.3205	10.0927	36.5231	10.2447
HTB 2826	M	466	386	406.5	388.5	335.5	258	55.5671	15.6175	33.529	11.4972	95.3621	18.6459	54.7942	14.6608	34.0465	12.2953	93.3524	19.7629	62.9301	17.5262	43.7039	14.0723	90.1029	18.7115	60.8022	17.0592	42.7475	13.5069	92.4579	17.572	51.9311	14.1294	36.1586	11.9752	66.7689	20.4048	32.0292	17.1892	82.9597	13.6757	41.3181	11.6843	22.4392	9.99389	79.8411	13.6631	45.8896	13.4631
HTB 3391	M	437.5	350	370	367.5	306	282.5	54.6124	13.5477	29.2248	11.1773	96.861	17.0653	53.6502	14.7731	34.928	11.6437	95.8927	18.0412	59.1835	16.3407	42.1858	13.2254	92.8271	16.3407	57.7457	16.0922	40.6718	12.2869	91.625	15.6654	48.6111	13.7476	32.9065	10.5833	68.2992	18.8151	32.7209	14.9862	83.5832	12.6037	39.7101	10.3293	20.9989	8.83135	83.2325	11.5941	46.7379	12.5318
HTB 3404	M	444	362.5	382	346	313	289.5	53.2784	16.8903	33.7153	11.8064	96.9447	19.5844	60.4921	17.0519	37.2533	12.366	99.7465	21.4267	66.7869	18.2976	47.1478	14.4202	95.0045	18.2041	63.5299	16.764	45.769	12.9874	89.3259	15.1108	53.7639	13.1626	34.7922	11.3169	69.9388	20.4062	37.1721	15.6654	89.4372	14.5747	48.6836	12.6153	24.3145	10.9616	87.9688	13.4835	53.6392	15.0099
HTB 3548	M	414.5	339	360.5	355	299.5	312	51.0065	15.2409	30.4999	10.414	92.4822	18.639	48.7293	13.8321	33.5367	11.008	91.9486	19.2193	55.8323	15.8383	40.979	12.3686	85.6014	17.8697	54.2904	15.3247	39.7217	12.4506	84.0482	16.8186	44.0307	12.4048	31.2033	11.0148	66.5844	20.1594	32.2798	17.1046	81.1982	13.9052	38.4544	10.5847	21.2945	8.9045	80.4549	12.267	44.7983	12.1923
M 135	M	457	358.5	379.5	386	309.5	279	54.1785	16.0163	27.5354	10.8456	90.8613	19.4153	53.0186	15.3249	34.2091	12.0373	89.367	19.8185	57.3196	17.0188	41.0759	13.384	85.2779	18.2743	56.0571	16.1855	38.949	12.7847	87.0031	16.2562	47.5974	13.838	31.4746	11.1362	69.015	21.1804	29.648	16.0902	80.6895	13.7421	40.8996	11.6514	20.1906	9.78953	79.0918	12.366	45.3814	13.0431
M 136	F	369.5	301	317	308.5	266.5	235.5	40.8323	12.1076	23.3718	8.55301	80.5369	13.6379	45.3816	11.3466	29.648	9.60472	82.8061	14.5715	51.6501	13.2927	37.0028	10.8403	78.403	13.2408	49.3625	12.883	35.236	10.1183	77.6423	10.6764	40.5625	10.0757	23.3694	8.48738	54.527	16.0976	26.2516	12.277	71.3545	9.85776	33.1962	8.22357	17.2042	6.94473	67.4279	9.73998	38.95	9.31333
M 138	F	408.5	326	343	335	282	251.5	49.6309	12.277	28.2094	9.48871	82.4687	13.7163	49.1155	12.1431	31.039	9.73814	82.9737	14.3109	55.2092	13.9723	38.6972	10.6764	78.5025	12.8395	53.6829	13.7671	37.3427	10.5847	80.1226	11.184	43.0147	11.1175	28.6419	8.97626	58.5069	16.6052	28.2969	12.8074	76.9595	10.6895	36.4076	10.0842	21.1667	8.29906	74.676	9.90636	40.0563	10.5041
M 174	F	380	304	316	312.5	263	234.5	44.7899	12.11	26.5353	9.33793	80.1699	13.6313	45.551	11.9572	30.3958	10.3293	81.1954	14.5629	51.7383	13.716	36.4938	11.1773	77.1343	13.803	49.5335	12.6292	34.7989	10.461	76.0443	12.1993	41.3205	10.2478	28.2043	8.69556	57.5303	17.6125	25.9932	13.6526	69.8796	9.46223	32.6814	8.48189	17.6139	7.71629	67.4023	8.98026	37.9308	10.1952
M 20	M	426.5	355.5	373	372	306	268	52.0948	15.5127	28.4485	11.699	94.5866	19.8974	59.3953	15.9901	39.2898	13.0431	96.0968	18.7121	64.9438	16.7659	45.2171	12.718	93.0506	17.9525	62.8433	16.1243	39.637	13.2994	89.3129	15.9317	52.7898	14.2401	37.0028	11.4303	69.0913	19.7455	32.6999	13.6526	85.9694	14.061	43.5216	11.0942	23.9728	8.94787	85.944	12.3639	46.3139	11.9383
M 264	M	449.5	357.5	376	377.5	306	271.5	57.1924	15.5844	31.2425	12.081	92.6123	18.4731	52.7019	14.061	35.8149	12.7948	89.9174	19.4741	57.9571	17.7818	43.4551	14.2363	84.765	18.2159	56.8114	17.6694	41.6568	13.4942	84.5493	16.5213	47.2611	14.3577	35.1417	11.695	69.0783	21.6034	32.1138	17.5154	80.3601	15.1591	38.3544	11.0913	21.8545	10.5857	80.5823	13.6408	43.1867	13.6355
M 300	F	417.5	322	337	336.5	284.5	250	43.6074	10.8387	24.1353	9.23837	81.4547	14.3127	49.3679	14.1119	31.9221	11.1875	81.6756	14.9013	53.6937	14.5629	38.8653	11.3482	78.9139	13.7254	52.5206	13.7913	38.3232	10.6952	76.541	13.3532	40.6456	12.0334	28.4542	9.83045	56.3881	17.1236	26.9161	14.2331	75.3655	10.754	34.8836	9.4041	19.1109	8.81266	74.7624	10.4484	41.4402	11.9428
M 35	F	355	279.5	296.5	325.5	258	226	40.6507	12.0239	24.7228	9.8217	70.3676	14.057	42.8534	12.6437	29.4991	9.73814	72.3908	14.6473	48.446	14.1393	36.0681	11.2619	69.8518	13.2254	46.3176	13.898	34.8831	11.0917	68.2855	11.6843	39.249	10.8601	27.6019	8.95107	54.3592	16.4883	24.3088	13.2937	66.1734	11.2387	32.008	9.99963	18.7488	8.89645	64.0927	10.0711	35.8988	10.2573
M 372	M	450	367	394.5	378.5	305	278	53.805	14.4782	28.7424	12.1993	93.5806	18.0501	54.2746	15.4588	35.9954	12.2872	93.1072	20.4048	60.9602	18.039	43.0983	13.8072	88.3165	17.7802	59.1034	16.6163	40.6471	13.2123	88.5704	15.4428	50.4699	14.9862	31.4169	11.103	66.8039	19.3107	34.2607	16.2701	87.1438	13.7601	41.9245	11.5175	23.3718	10.0136	82.8908	13.0246	44.7894	12.3686
M 470	F	365.5	296.5	308	301	254.5	225	40.2598	11.6043	19.475	9.14753	74.4278	13.3797	41.9968	11.3567	27.7708	9.66128	76.1155	14.8254	48.5993	13.3797	34.2926	11.4413	70.7821	13.0455	45.7354	12.1738	32.713	10.4418	71.855	11.4751	37.288	10.0422	25.1305	8.72436	50.9128	15.2409	21.9563	12.8738	64.6062	9.99067	31.5811	8.55804	14.5627	8.51774	65.0285	10.0938	35.9211	10.267
M 490	F	376.5	293.5	309	318	254	225	41.2382	11.1072	23.5411	8.84594	74.6375	13.8941	42.5975	11.0275	26.5093	9.15379	76.2152	14.3973	46.9901	12.3639	33.708	10.4171	71.2132	13.4663	44.6483	12.2542	32.4274	9.73667	66.3821	12.0729	37.9307	9.72451	25.1076	8.39396	52.9697	15.348	23.2958	12.9565	64.8688	11.2991	31.8348	9.0787	17.0256	7.56571	65.81	10.1857	35.3971	9.23022
M 58	F	374	301.5	317	305	263	231.5	42.6089	9.48871	23.4533	8.94787	78.7489	13.7913	43.1867	10.9616	28.6205	9.3168	78.1496	14.2243	49.1067	12.8693	36.0681	10.5847	74.5071	12.832	48.0067	12.2214	34.8083	10.267	72.3363	11.3456	39.637	9.84248	27.5387	8.54924	53.8896	14.9035	26.5602	12.366	67.8284	10.7557	32.5253	9.23216	18.2419	7.80588	66.741	9.84466	35.9869	10.1773
M 687	M	441.5	345.5	364	353	291	256.5	49.5372	13.4631	30.0026	11.0226	92.7466	18.8647	51.909	14.225	34.9677	12.0334	93.4726	19.6543	58.9354	15.9176	43.1803	14.0638	89.7582	19.8127	55.9878	14.9977	40.6598	13.0431	88.3922	15.0721	46.3189	12.366	31.9234	10.8535	63.7541	20.3343	30.7568	15.5023	81.9617	13.6985	39.2065	11.3504	22.2688	9.66128	82.0436	13.0433	42.8413	12.3686
M 690	M	487.5	386	410	402	332	298.5	56.8123	14.3209	28.7025	11.0148	95.5162	18.7666	52.2427	14.6769	34.0377	12.4506	94.5003	18.5451	56.8237	16.2562	40.1342	12.9764	88.9937	17.0351	53.8592	15.3331	34.0566	12.1993	92.5345	14.9208	44.5347	12.549	28.8837	11.008	66.6361	20.6081	27.3695	16.3442	84.5652	13.4297	39.7412	11.4751	22.0238	9.82717	78.6801	13.3024	42.5927	12.0239
M 696	F	404	310	327	338	287	251.5	45.5152	10.0927	24.9883	9.65237	83.15	14.0212	48.7099	11.7088	32.259	9.75469	82.3326	14.0549	55.035	13.384	39.2081	10.8377	80.1794	13.2927	51.7449	12.5307	38.354	10.4143	76.4934	11.3769	43.5453	10.5017	31.08	9.14753	61.4764	15.9254	28.2969	13.4644	75.0254	10.5918	38.2852	9.22906	21.5907	8.47344	73.6682	8.57812	42.0288	10.3297
M 720	M	484	400	418.5	427.5	350	307	60.0404	13.8864	34.5544	12.3848	104.583	18.4358	59.436	15.7591	37.2542	12.284	105.583	20.1807	66.5965	17.1892	46.0615	14.057	101.432	19.1354	65.1087	17.36	46.3238	13.53	97.3879	18.3851	55.8823	14.2124	36.8549	11.4679	73.5345	22.1853	34.1274	16.0487	89.0017	13.2929	43.6054	10.943	21.8466	9.23216	88.978	12.0408	49.5303	12.9551
M 729	M	466.5	362.5	373	394	332	291.5	53.9648	15.6642	30.8448	11.6021	92.3171	18.5798	53.0995	15.3434	35.8988	11.6006	90.2547	18.2951	59.9488	17.3585	44.4822	13.2927	89.0719	17.0233	58.6755	16.3626	42.6963	12.6335	90.2505	15.1894	47.2452	12.7813	33.7488	10.5109	70.6181	23.6234	33.1962	16.6828	85.1767	13.803	40.2167	11.7836	23.2042	9.58081	85.0907	13.8445	45.636	13.4716
M 755	F	402	307.5	324	329	272.5	239.5	45.9795	12.4564	23.3646	8.72231	82.219	14.7342	46.1483	11.2658	29.3853	9.23022	85.0087	14.7342	51.3929	13.5477	37.5077	10.9223	80.6262	13.8318	49.4639	12.8127	35.7519	10.5654	74.763	12.0227	40.7335	10.4484	26.67	8.73545	57.5743	17.4465	24.6556	13.2178	75.8636	10.245	34.9673	9.83045	18.4853	8.26531	74.5937	10.2796	39.9628	10.6107
M 766	M	462.5	365.5	387.5	398.5	313	281.5	55.3736	12.2343	30.5181	12.1431	96.0183	20.3936	57.443	15.0814	37.0028	11.6021	98.5556	19.9901	64.6858	18.1218	45.769	14.228	95.8457	17.8745	62.243	17.1948	44.0348	13.803	89.8489	18.4591	48.0997	14.0133	33.9979	11.4904	71.6195	22.1176	33.5751	18.2929	84.0965	13.3784	43.18	11.6145	20.8287	10.0785	83.8446	13.6355	49.4456	14.5637
M 786	F	369.5	306	324.5	316	262.5	232.5	43.6074	12.7849	26.162	9.59128	83.0459	15.3583	50.8864	13.1375	34.9683	10.3297	84.9289	15.5934	55.7271	14.9016	40.7278	12.1073	77.7247	15.3772	53.0046	14.8254	39.7934	11.4378	80.1815	14.1198	44.4286	12.1147	31.4665	9.13655	58.0293	17.6125	28.1986	14.1416	73.7517	11.0994	38.0267	10.5017	19.48	8.29777	71.7974	10.774	42.0032	11.5996
M 798	F	379.5	306	322	318	263	237	38.6095	11.3504	22.9711	8.5551	75.2841	13.6379	45.8932	12.6633	29.8046	9.40143	76.454	14.071	49.7886	13.803	35.9051	10.4171	73.7451	13.0398	47.1703	12.8752	34.9739	10.2478	72.2304	12.0373	39.5484	10.8456	27.3604	8.57812	52.2404	16.1749	25.7421	13.3059	69.4275	10.0225	33.8693	9.1581	18.9655	7.88537	67.1411	9.71455	37.4414	10.1632
M 799	F	404	316	338	331.5	274	243	46.9115	12.0373	25.4622	9.65237	81.8727	13.3172	45.297	12.0373	30.1472	9.8217	84.1659	14.2243	51.9864	13.5596	37.2534	11.0926	79.0042	13.297	49.4025	13.2538	35.6547	10.671	76.6526	11.2864	39.8542	10.7447	27.9688	8.77026	56.7343	17.5311	27.0788	13.5438	68.5087	9.63341	34.7984	9.65534	20.8295	8.56641	68.3336	9.36438	38.7807	10.5847
M 835	M	471.5	385	410.5	398.5	344	303	56.8296	14.9862	31.3267	11.8545	95.4207	19.2423	55.4005	15.6375	36.4929	11.7735	94.4079	20.0662	61.4869	17.2722	44.2012	13.8856	90.0893	18.7968	57.6038	16.812	40.815	13.0455	93.1487	16.0398	47.5571	14.2884	33.5332	10.8426	70.2864	23.4602	35.6511	16.854	90.3775	13.483	43.5425	11.5993	26.504	9.56883	88.0548	14.7023	48.7804	13.0387
M 840	F	371.5	301	323	315	263	234	46.3974	11.0275	25.6575	9.48304	79.4895	14.5134	50.6377	13.0521	32.2581	10.9223	80.518	15.2421	54.5259	14.498	38.7885	12.2158	74.8802	13.8017	52.0129	13.9597	37.7774	11.4313	74.3751	12.1573	44.8067	11.5672	30.3787	9.51474	57.7457	16.4256	27.3898	13.7421	72.3971	12.0146	36.9155	9.906	19.1364	8.55133	71.2047	10.6808	40.307	10.5072
M 856	F	366	287	298.5	314.5	256	222.5	45.5681	10.8377	23.0307	8.77965	76.9088	14.1963	45.156	11.0262	27.8805	9.26742	80.3503	14.7439	52.1558	13.6337	36.5858	10.9233	76.287	13.0521	50.0587	12.2793	34.4743	10.0197	73.9157	11.3482	39.9671	10.0197	26.8694	8.55133	55.7994	16.1243	23.8299	13.2178	68.1575	9.55646	32.5653	8.46709	16.0922	7.80083	66.2393	9.23837	38.1001	9.65534
M 875	M	481	363.5	386.5	402	338	293.5	50.0383	15.851	30.8303	12.0575	94.5983	18.2888	55.074	14.2363	36.8362	11.6043	94.8273	19.1438	62.599	16.5306	46.0538	12.2953	90.2579	17.018	59.5245	15.3249	43.8586	11.9623	90.9377	14.2243	49.2778	12.5718	34.3756	10.4195	74.1958	20.9621	31.3195	15.7991	81.2844	16.1303	42.0139	13.9111	22.6908	9.73703	82.5598	12.883	47.4145	13.0411
M 877	F	376.5	300.5	316.5	313	255	236	44.4706	12.023	26.5855	9.31487	77.7683	13.898	45.8921	12.2767	30.9701	9.45276	79.3327	15.0716	52.0975	14.5637	38.5233	11.0942	76.7097	13.971	50.8881	14.001	36.068	10.4264	73.1591	13.2937	41.6561	10.4309	29.2977	10.1604	55.4569	16.4288	26.9432	12.1076	70.719	10.8601	34.5615	9.39838	20.0217	7.2463	70.7096	10.16	40.9011	10.414
M 879	M	492.5	390	411	427.5	357	322	56.233	15.3247	26.1006	13.5636	102.728	19.7493	55.0073	14.7293	37.6035	12.8972	107.53	20.2369	66.2954	18.6274	47.5173	15.0766	102.114	18.7977	63.4154	17.4514	46.4913	14.732	101.097	17.9543	50.2926	13.1367	35.7358	12.4946	72.3339	22.5271	28.7868	15.4949	95.6779	13.7421	40.2968	10.9223	19.5596	9.98708	94.8267	14.2545	49.7843	14.2303
M 89	F	368	286.5	298	306.5	254	224	42.1682	10.8403	27.8636	10.0082	79.1833	14.8188	47.4134	12.0239	30.4819	10.5109	77.6543	15.4114	52.6629	13.5477	38.6139	11.6006	76.2228	14.3933	50.2234	12.6165	36.3224	11.103	73.6602	12.3686	40.7261	10.2503	28.1093	9.23837	55.035	16.3409	28.081	13.3059	66.5902	10.7163	35.3069	9.40143	20.0667	8.38585	64.9796	10.1476	40.2199	10.8585
M 932	F	375	303.5	322	319	273	244.5	48.6958	12.7071	25.7388	9.73703	87.5503	15.7925	50.4684	11.6302	34.3026	10.364	87.0744	16.0902	55.2897	14.2331	41.0886	11.9383	84.0119	14.987	52.7507	13.8004	39.3723	10.472	84.8402	14.5784	45.128	11.1843	31.08	9.41667	61.8067	17.536	28.6299	13.9703	75.3534	11.6191	36.159	9.39838	21.252	8.9045	70.6122	10.6404	41.3177	11.43
M 95	F	388	316.5	331.5	338	283.5	249.5	45.2127	11.8533	27.6881	9.16319	80.9241	14.7876	48.8545	12.1431	33.5666	10.4987	80.9458	14.9208	53.1709	14.3956	39.2927	11.6843	77.3014	14.6476	51.6834	14.0623	37.5235	11.5299	74.6784	12.4693	43.7242	10.5017	30.5647	10.0927	59.36	16.3409	28.8725	15.5823	78.5145	11.699	36.1562	10.0036	20.3545	8.74693	72.9091	10.1663	40.8972	10.5041
M 96	F	376	304	320.5	324	258	232	39.9387	10.245	21.1667	8.40932	77.8501	14.9359	44.7541	11.5458	29.7239	10.3349	80.5309	15.6636	51.0543	13.0387	37.5074	11.4303	73.8363	13.8864	47.4406	12.7917	37.0241	11.1875	72.6884	12.3799	38.188	10.0785	26.8395	8.90007	53.9079	17.0188	26.4226	13.7288	68.436	11.4363	33.4614	9.15027	19.1534	8.73545	67.6818	10.637	37.0855	10.2461
	Count	57	56	56	57	57	57	57	57	57	57	57	57	55	55	57	57	57	57	57	57	57	57	57	57	57	57	56	56	57	57	57	57	57	57	57	57	57	57	57	57	57	57	57	57	57	57	57	57
	Avg	418.947	335.92	354.598	355.184	294.167	261.544	49.7478	13.389	26.5823	10.4678	88.8891	16.5204	50.9523	13.3973	33.539	11.06	89.7287	17.3027	57.1302	15.5377	41.0037	12.4956	85.1947	15.9345	54.6313	14.7549	39.2144	11.9571	83.342	14.1784	45.1422	12.0915	30.8701	10.0882	63.0033	18.755	29.4635	14.8509	78.6052	12.2298	38.1346	10.3901	20.6994	9.03863	76.9751	11.5946	42.8631	11.7198
	SD	43.2829	35.6259	37.6469	38.0092	31.555	28.3192	6.22031	2.03611	5.29839	1.31071	9.24027	2.30722	5.08397	1.59477	3.4465	1.24241	9.16602	2.39891	5.59385	1.71806	4.21892	1.27769	8.67104	2.25023	5.50839	1.72687	3.95874	1.31762	8.73824	2.16477	4.72668	1.59872	3.55746	1.15174	6.94802	2.31093	3.58982	1.62695	7.93749	1.60989	4.02997	1.17467	2.78268	0.940894	7.95428	1.60489	4.40963	1.36982
	Var	1873.41	1269.21	1417.29	1444.7	995.717	801.976	38.6923	4.14573	28.0729	1.71795	85.3826	5.32326	25.8467	2.54329	11.8784	1.54358	84.016	5.75479	31.2912	2.95172	17.7993	1.6325	75.187	5.06352	30.3423	2.98208	15.6716	1.73611	76.3569	4.68625	22.3415	2.55592	12.6555	1.32652	48.2749	5.34039	12.8868	2.64698	63.0038	2.59174	16.2406	1.37985	7.74332	0.885281	63.2705	2.57568	19.4448	1.8764
Female	26
Male	31
[truncated: 14 more columns]
