# Supplementary material for: Complex genetic architecture underlies human hand and foot evolution
Source: Research Square preprint supplement (doi:10.21203/rs.3.rs-7124496/v1), 2025-08-18
Supplement: Supplementary file 3 [file 5044450d65c4e63f479c249e.xlsx]

## Sheet: Samples and Sequencing Info
Age	Sample ID	Sex	Date of Collection	Sample Name	RIN Score	Library Preparation Method	i7	i7 Sequence	i5	i5 Sequence NovaSeq	Sequencing Platform	Read Type	Read Length	Sequencing Lane	Reads	% Bases >= Q30	Total Reads	Description	1
E15.5	A	Female	2022-03-20	HP1A	6.2	Takara SMART-Seq v4 Ultra Low Input RNA Kit Library Preparation	Nextera XT Index Kit: N701	TAAGGCGA	Nextera XT Index Kit: S502	ATAGAGAG	MiSeq Nano	Paired End	150	1	17541	92.57	53192473	RNA-seq on Mouse E15.5 Skeletal Tissue	2
											NovaSeq S4	Paired End	100	1	28446708	94.1		RNA-seq on Mouse E15.5 Skeletal Tissue	2
											NovaSeq S4	Paired End	100	1	24728224	93.74		RNA-seq on Mouse E15.5 Skeletal Tissue	2
				HP3A	7.8	Takara SMART-Seq v4 Ultra Low Input RNA Kit Library Preparation	Nextera XT Index Kit: N701	TAAGGCGA	Nextera XT Index Kit: S503	AGAGGATA	MiSeq Nano	Paired End	150	1	11231	95.66	37245993	RNA-seq on Mouse E15.5 Skeletal Tissue	3
											NovaSeq S4	Paired End	100	1	20179886	93.26		RNA-seq on Mouse E15.5 Skeletal Tissue	3
											NovaSeq S4	Paired End	100	1	17054876	92.65		RNA-seq on Mouse E15.5 Skeletal Tissue	3
				HP5A	9	Takara SMART-Seq v4 Ultra Low Input RNA Kit Library Preparation	Nextera XT Index Kit: N701	TAAGGCGA	Nextera XT Index Kit: S504	AGAGGATA	MiSeq Nano	Paired End	150	1	14013	95.39	41720156	RNA-seq on Mouse E15.5 Skeletal Tissue	4
											NovaSeq S4	Paired End	100	1	23309935	93.94		RNA-seq on Mouse E15.5 Skeletal Tissue	4
											NovaSeq S4	Paired End	100	1	18396208	93.5		RNA-seq on Mouse E15.5 Skeletal Tissue	4
				HM1A	7.6	Takara SMART-Seq v4 Ultra Low Input RNA Kit Library Preparation	Nextera XT Index Kit: N701	TAAGGCGA	Nextera XT Index Kit: S505	CTCCTTAC	MiSeq Nano	Paired End	150	1	14157	92.84	38587106	RNA-seq on Mouse E15.5 Skeletal Tissue	5
											NovaSeq S4	Paired End	100	1	21095172	94.12		RNA-seq on Mouse E15.5 Skeletal Tissue	5
											NovaSeq S4	Paired End	100	1	17477777	93.78		RNA-seq on Mouse E15.5 Skeletal Tissue	5
				HM3A	8	Takara SMART-Seq v4 Ultra Low Input RNA Kit Library Preparation	Nextera XT Index Kit: N701	TAAGGCGA	Nextera XT Index Kit: S506	TATGCAGT	MiSeq Nano	Paired End	150	1	12403	95.08	37960799	RNA-seq on Mouse E15.5 Skeletal Tissue	6
											NovaSeq S4	Paired End	100	1	20984833	93.71		RNA-seq on Mouse E15.5 Skeletal Tissue	6
											NovaSeq S4	Paired End	100	1	16963563	93.18		RNA-seq on Mouse E15.5 Skeletal Tissue	6
				HM5A	7.3	Takara SMART-Seq v4 Ultra Low Input RNA Kit Library Preparation	Nextera XT Index Kit: N701	TAAGGCGA	Nextera XT Index Kit: S507	TACTCCTT	MiSeq Nano	Paired End	150	1	14064	94.39	48393631	RNA-seq on Mouse E15.5 Skeletal Tissue	7
											NovaSeq S4	Paired End	100	1	25923735	93.99		RNA-seq on Mouse E15.5 Skeletal Tissue	7
											NovaSeq S4	Paired End	100	1	22455832	93.52		RNA-seq on Mouse E15.5 Skeletal Tissue	7
				FP1A	9.2	Takara SMART-Seq v4 Ultra Low Input RNA Kit Library Preparation	Nextera XT Index Kit: N701	TAAGGCGA	Nextera XT Index Kit: S508	AGGCTTAG	MiSeq Nano	Paired End	150	1	10037	94.97	34945357	RNA-seq on Mouse E15.5 Skeletal Tissue	8
											NovaSeq S4	Paired End	100	1	19093926	92.14		RNA-seq on Mouse E15.5 Skeletal Tissue	8
											NovaSeq S4	Paired End	100	1	15841394	91.51		RNA-seq on Mouse E15.5 Skeletal Tissue	8
				FP3A	9	Takara SMART-Seq v4 Ultra Low Input RNA Kit Library Preparation	Nextera XT Index Kit: N701	TAAGGCGA	Nextera XT Index Kit: S517	TCTTACGC	MiSeq Nano	Paired End	150	1	10296	95.32	34844453	RNA-seq on Mouse E15.5 Skeletal Tissue	9
											NovaSeq S4	Paired End	100	1	19435948	92.95		RNA-seq on Mouse E15.5 Skeletal Tissue	9
											NovaSeq S4	Paired End	100	1	15398209	92.34		RNA-seq on Mouse E15.5 Skeletal Tissue	9
				FP5A	8.1	Takara SMART-Seq v4 Ultra Low Input RNA Kit Library Preparation	Nextera XT Index Kit: N702	CGTACTAG	Nextera XT Index Kit: S502	ATAGAGAG	MiSeq Nano	Paired End	150	1	6552	95.42	34514604	RNA-seq on Mouse E15.5 Skeletal Tissue	10
											NovaSeq S4	Paired End	100	1	18703992	92.64		RNA-seq on Mouse E15.5 Skeletal Tissue	10
											NovaSeq S4	Paired End	100	1	15804060	92.02		RNA-seq on Mouse E15.5 Skeletal Tissue	10
				FM1A	7.7	Takara SMART-Seq v4 Ultra Low Input RNA Kit Library Preparation	Nextera XT Index Kit: N702	CGTACTAG	Nextera XT Index Kit: S503	AGAGGATA	MiSeq Nano	Paired End	150	1	12257	95.25	44922045	RNA-seq on Mouse E15.5 Skeletal Tissue	11
											NovaSeq S4	Paired End	100	1	24340317	93.66		RNA-seq on Mouse E15.5 Skeletal Tissue	11
											NovaSeq S4	Paired End	100	1	20569471	93.1		RNA-seq on Mouse E15.5 Skeletal Tissue	11
				FM3A	7.5	Takara SMART-Seq v4 Ultra Low Input RNA Kit Library Preparation	Nextera XT Index Kit: N702	CGTACTAG	Nextera XT Index Kit: S504	AGAGGATA	MiSeq Nano	Paired End	150	1	10526	95.73	39361842	RNA-seq on Mouse E15.5 Skeletal Tissue	12
											NovaSeq S4	Paired End	100	1	22098379	93.63		RNA-seq on Mouse E15.5 Skeletal Tissue	12
											NovaSeq S4	Paired End	100	1	17252937	93.17		RNA-seq on Mouse E15.5 Skeletal Tissue	12
				FM5A	8.9	Takara SMART-Seq v4 Ultra Low Input RNA Kit Library Preparation	Nextera XT Index Kit: N702	CGTACTAG	Nextera XT Index Kit: S505	CTCCTTAC	MiSeq Nano	Paired End	150	1	9300	94.99	36365552	RNA-seq on Mouse E15.5 Skeletal Tissue	13
											NovaSeq S4	Paired End	100	1	20108248	93.59		RNA-seq on Mouse E15.5 Skeletal Tissue	13
											NovaSeq S4	Paired End	100	1	16248004	93.13		RNA-seq on Mouse E15.5 Skeletal Tissue	13
																			14
E15.5	D	Male	2022-04-06	HP1D	9.3	Takara SMART-Seq v4 Ultra Low Input RNA Kit Library Preparation	Nextera XT Index Kit: N702	CGTACTAG	Nextera XT Index Kit: S506	TATGCAGT	MiSeq Nano	Paired End	150	1	13855	93.66	47601903	RNA-seq on Mouse E15.5 Skeletal Tissue	15
											NovaSeq S4	Paired End	100	1	26209935	94.39		RNA-seq on Mouse E15.5 Skeletal Tissue	15
											NovaSeq S4	Paired End	100	1	21378113	94.05		RNA-seq on Mouse E15.5 Skeletal Tissue	15
				HP3D	7.1	Takara SMART-Seq v4 Ultra Low Input RNA Kit Library Preparation	Nextera XT Index Kit: N702	CGTACTAG	Nextera XT Index Kit: S507	TACTCCTT	MiSeq Nano	Paired End	150	1	11053	95.35	45294406	RNA-seq on Mouse E15.5 Skeletal Tissue	16
											NovaSeq S4	Paired End	100	1	24431675	93.66		RNA-seq on Mouse E15.5 Skeletal Tissue	16
											NovaSeq S4	Paired End	100	1	20851678	93.15		RNA-seq on Mouse E15.5 Skeletal Tissue	16
						Kapa mRNA Hyper prep (25 ng)	IDT_8nt_UDI_TruSeq_i7_199	TCGTAGTC	IDT_8nt_UDI_TruSeq_i5_199	CGAGTTAG	MiSeq Nano	Paired End	150	1	5129	95.48	31926443	RNA-seq on Mouse E15.5 Skeletal Tissue (Sample Prep Control)	16.1
											NovaSeq S4	Paired End	100	4	4630743	92.48		RNA-seq on Mouse E15.5 Skeletal Tissue (Sample Prep Control)	16.1
											NovaSeq S4	Paired End	100	2	4422198	92.77		RNA-seq on Mouse E15.5 Skeletal Tissue (Sample Prep Control)	16.1
											NovaSeq S4	Paired End	100	3	4808626	92.66		RNA-seq on Mouse E15.5 Skeletal Tissue (Sample Prep Control)	16.1
											NovaSeq S4	Paired End	100	4	4013696	92.23		RNA-seq on Mouse E15.5 Skeletal Tissue (Sample Prep Control)	16.1
											NovaSeq S4	Paired End	100	2	5991658	92.32		RNA-seq on Mouse E15.5 Skeletal Tissue (Sample Prep Control)	16.1
											NovaSeq S4	Paired End	100	1	8054393	93.24		RNA-seq on Mouse E15.5 Skeletal Tissue (Sample Prep Control)	16.1
																		RNA-seq on Mouse E15.5 Skeletal Tissue (Sample Prep Control)	16.1
				HP5D	7.9	Takara SMART-Seq v4 Ultra Low Input RNA Kit Library Preparation	Nextera XT Index Kit: N702	CGTACTAG	Nextera XT Index Kit: S508	AGGCTTAG	MiSeq Nano	Paired End	150	1	10716	94.67	42742008	RNA-seq on Mouse E15.5 Skeletal Tissue	17
											NovaSeq S4	Paired End	100	1	23370129	93.63		RNA-seq on Mouse E15.5 Skeletal Tissue	17
											NovaSeq S4	Paired End	100	1	19361163	93.21		RNA-seq on Mouse E15.5 Skeletal Tissue	17
				HM1D	6.1	Takara SMART-Seq v4 Ultra Low Input RNA Kit Library Preparation	Nextera XT Index Kit: N702	CGTACTAG	Nextera XT Index Kit: S517	TCTTACGC	MiSeq Nano	Paired End	150	1	14256	86.24	42451910	RNA-seq on Mouse E15.5 Skeletal Tissue	18
											NovaSeq S4	Paired End	100	1	23556116	90.84		RNA-seq on Mouse E15.5 Skeletal Tissue	18
											NovaSeq S4	Paired End	100	1	18881538	90.56		RNA-seq on Mouse E15.5 Skeletal Tissue	18
				HM3D	8.4	Takara SMART-Seq v4 Ultra Low Input RNA Kit Library Preparation	Nextera XT Index Kit: N703	AGGCAGAA	Nextera XT Index Kit: S502	ATAGAGAG	MiSeq Nano	Paired End	150	1	17225	93.77	51057158	RNA-seq on Mouse E15.5 Skeletal Tissue	19
											NovaSeq S4	Paired End	100	1	27370936	94.2		RNA-seq on Mouse E15.5 Skeletal Tissue	19
											NovaSeq S4	Paired End	100	1	23668997	93.75		RNA-seq on Mouse E15.5 Skeletal Tissue	19
				HM5D	8.8	Takara SMART-Seq v4 Ultra Low Input RNA Kit Library Preparation	Nextera XT Index Kit: N703	AGGCAGAA	Nextera XT Index Kit: S503	AGAGGATA	MiSeq Nano	Paired End	150	1	19953	92.6	52022024	RNA-seq on Mouse E15.5 Skeletal Tissue	20
											NovaSeq S4	Paired End	100	1	27859243	93.81		RNA-seq on Mouse E15.5 Skeletal Tissue	20
											NovaSeq S4	Paired End	100	1	24142828	93.49		RNA-seq on Mouse E15.5 Skeletal Tissue	20
				FP1D	8.8	Takara SMART-Seq v4 Ultra Low Input RNA Kit Library Preparation	Nextera XT Index Kit: N703	AGGCAGAA	Nextera XT Index Kit: S504	AGAGGATA	MiSeq Nano	Paired End	150	1	13369	95.44	40171005	RNA-seq on Mouse E15.5 Skeletal Tissue	21
											NovaSeq S4	Paired End	100	1	22504795	93.28		RNA-seq on Mouse E15.5 Skeletal Tissue	21
											NovaSeq S4	Paired End	100	1	17652841	92.74		RNA-seq on Mouse E15.5 Skeletal Tissue	21
				FP3D	7.7	Takara SMART-Seq v4 Ultra Low Input RNA Kit Library Preparation	Nextera XT Index Kit: N703	AGGCAGAA	Nextera XT Index Kit: S505	CTCCTTAC	MiSeq Nano	Paired End	150	1	9609	95.22	28610578	RNA-seq on Mouse E15.5 Skeletal Tissue	22
											NovaSeq S4	Paired End	100	1	15818945	89.56		RNA-seq on Mouse E15.5 Skeletal Tissue	22
											NovaSeq S4	Paired End	100	1	12782024	88.85		RNA-seq on Mouse E15.5 Skeletal Tissue	22
						Kapa mRNA Hyper prep (25 ng)	IDT_8nt_UDI_TruSeq_i7_211	TTGACAGG	IDT_8nt_UDI_TruSeq_i5_211	GAAGACTG	MiSeq Nano	Paired End	150	1	5166	95.95	30521132	RNA-seq on Mouse E15.5 Skeletal Tissue (Sample Prep Control)	22.1
											NovaSeq S4	Paired End	100	4	4757280	92.19		RNA-seq on Mouse E15.5 Skeletal Tissue (Sample Prep Control)	22.1
											NovaSeq S4	Paired End	100	2	3684367	92.8		RNA-seq on Mouse E15.5 Skeletal Tissue (Sample Prep Control)	22.1
											NovaSeq S4	Paired End	100	3	4271100	92.6		RNA-seq on Mouse E15.5 Skeletal Tissue (Sample Prep Control)	22.1
											NovaSeq S4	Paired End	100	4	2562475	92.33		RNA-seq on Mouse E15.5 Skeletal Tissue (Sample Prep Control)	22.1
											NovaSeq S4	Paired End	100	2	6491381	92.22		RNA-seq on Mouse E15.5 Skeletal Tissue (Sample Prep Control)	22.1
											NovaSeq S4	Paired End	100	1	8749363	92.9		RNA-seq on Mouse E15.5 Skeletal Tissue (Sample Prep Control)	22.1
																		RNA-seq on Mouse E15.5 Skeletal Tissue (Sample Prep Control)	22.1
				FP5D	7.5	Takara SMART-Seq v4 Ultra Low Input RNA Kit Library Preparation	Nextera XT Index Kit: N703	AGGCAGAA	Nextera XT Index Kit: S506	TATGCAGT	MiSeq Nano	Paired End	150	1	13532	95.49	40542287	RNA-seq on Mouse E15.5 Skeletal Tissue	23
											NovaSeq S4	Paired End	100	1	22440621	93.5		RNA-seq on Mouse E15.5 Skeletal Tissue	23
											NovaSeq S4	Paired End	100	1	18088134	92.89		RNA-seq on Mouse E15.5 Skeletal Tissue	23
				FM1D	8.7	Takara SMART-Seq v4 Ultra Low Input RNA Kit Library Preparation	Nextera XT Index Kit: N703	AGGCAGAA	Nextera XT Index Kit: S507	TACTCCTT	MiSeq Nano	Paired End	150	1	18838	92.6	55110577	RNA-seq on Mouse E15.5 Skeletal Tissue	24
											NovaSeq S4	Paired End	100	1	29457389	93.92		RNA-seq on Mouse E15.5 Skeletal Tissue	24
											NovaSeq S4	Paired End	100	1	25634350	93.55		RNA-seq on Mouse E15.5 Skeletal Tissue	24
				FM3D	7.2	Takara SMART-Seq v4 Ultra Low Input RNA Kit Library Preparation	Nextera XT Index Kit: N703	AGGCAGAA	Nextera XT Index Kit: S508	AGGCTTAG	MiSeq Nano	Paired End	150	1	8648	94.68	26437130	RNA-seq on Mouse E15.5 Skeletal Tissue	25
											NovaSeq S4	Paired End	100	1	14430606	93.24		RNA-seq on Mouse E15.5 Skeletal Tissue	25
											NovaSeq S4	Paired End	100	1	11997876	92.7		RNA-seq on Mouse E15.5 Skeletal Tissue	25
				FM5D	8.9	Takara SMART-Seq v4 Ultra Low Input RNA Kit Library Preparation	Nextera XT Index Kit: N703	AGGCAGAA	Nextera XT Index Kit: S517	TCTTACGC	MiSeq Nano	Paired End	150	1	11487	94.81	36009395	RNA-seq on Mouse E15.5 Skeletal Tissue	26
											NovaSeq S4	Paired End	100	1	20114450	91.32		RNA-seq on Mouse E15.5 Skeletal Tissue	26
											NovaSeq S4	Paired End	100	1	15883458	90.45		RNA-seq on Mouse E15.5 Skeletal Tissue	26
																			27
E15.5	F	Female	2022-04-07	HP1F	7.6	Takara SMART-Seq v4 Ultra Low Input RNA Kit Library Preparation	Nextera XT Index Kit: N704	TCCTGAGC	Nextera XT Index Kit: S502	ATAGAGAG	MiSeq Nano	Paired End	150	1	17168	94.48	59038532	RNA-seq on Mouse E15.5 Skeletal Tissue	28
											NovaSeq S4	Paired End	100	1	31768966	93.97		RNA-seq on Mouse E15.5 Skeletal Tissue	28
											NovaSeq S4	Paired End	100	1	27252398	93.48		RNA-seq on Mouse E15.5 Skeletal Tissue	28
				HP3F	7.6	Takara SMART-Seq v4 Ultra Low Input RNA Kit Library Preparation	Nextera XT Index Kit: N704	TCCTGAGC	Nextera XT Index Kit: S503	AGAGGATA	MiSeq Nano	Paired End	150	1	10065	96.17	37046048	RNA-seq on Mouse E15.5 Skeletal Tissue	29
											NovaSeq S4	Paired End	100	1	20204602	92.54		RNA-seq on Mouse E15.5 Skeletal Tissue	29
											NovaSeq S4	Paired End	100	1	16831381	91.85		RNA-seq on Mouse E15.5 Skeletal Tissue	29
				HP5F	7.8	Takara SMART-Seq v4 Ultra Low Input RNA Kit Library Preparation	Nextera XT Index Kit: N704	TCCTGAGC	Nextera XT Index Kit: S504	AGAGGATA	MiSeq Nano	Paired End	150	1	16919	95.57	53990195	RNA-seq on Mouse E15.5 Skeletal Tissue	30
											NovaSeq S4	Paired End	100	1	30230743	93.86		RNA-seq on Mouse E15.5 Skeletal Tissue	30
											NovaSeq S4	Paired End	100	1	23742533	93.42		RNA-seq on Mouse E15.5 Skeletal Tissue	30
				HM1F	8.5	Takara SMART-Seq v4 Ultra Low Input RNA Kit Library Preparation	Nextera XT Index Kit: N704	TCCTGAGC	Nextera XT Index Kit: S505	CTCCTTAC	MiSeq Nano	Paired End	150	1	16435	94.47	50590294	RNA-seq on Mouse E15.5 Skeletal Tissue	31
											NovaSeq S4	Paired End	100	1	27751138	93.93		RNA-seq on Mouse E15.5 Skeletal Tissue	31
											NovaSeq S4	Paired End	100	1	22822721	93.5		RNA-seq on Mouse E15.5 Skeletal Tissue	31
				HM3F	7.4	Takara SMART-Seq v4 Ultra Low Input RNA Kit Library Preparation	Nextera XT Index Kit: N704	TCCTGAGC	Nextera XT Index Kit: S506	TATGCAGT	MiSeq Nano	Paired End	150	1	15792	95.58	53305323	RNA-seq on Mouse E15.5 Skeletal Tissue	32
											NovaSeq S4	Paired End	100	1	29522373	93.83		RNA-seq on Mouse E15.5 Skeletal Tissue	32
											NovaSeq S4	Paired End	100	1	23767158	93.3		RNA-seq on Mouse E15.5 Skeletal Tissue	32
				HM5F	Concentration too low to calculate RIN	Takara SMART-Seq v4 Ultra Low Input RNA Kit Library Preparation	Nextera XT Index Kit: N704	TCCTGAGC	Nextera XT Index Kit: S507	TACTCCTT	MiSeq Nano	Paired End	150	1	18924	91.94	57754675	RNA-seq on Mouse E15.5 Skeletal Tissue	33
											NovaSeq S4	Paired End	100	1	30917634	94.1		RNA-seq on Mouse E15.5 Skeletal Tissue	33
											NovaSeq S4	Paired End	100	1	26818117	93.82		RNA-seq on Mouse E15.5 Skeletal Tissue	33
				FP1F	7.9	Takara SMART-Seq v4 Ultra Low Input RNA Kit Library Preparation	Nextera XT Index Kit: N704	TCCTGAGC	Nextera XT Index Kit: S508	AGGCTTAG	MiSeq Nano	Paired End	150	1	14751	94.78	50097981	RNA-seq on Mouse E15.5 Skeletal Tissue	34
											NovaSeq S4	Paired End	100	1	27401263	93.55		RNA-seq on Mouse E15.5 Skeletal Tissue	34
											NovaSeq S4	Paired End	100	1	22681967	93.1		RNA-seq on Mouse E15.5 Skeletal Tissue	34
				FP3F	6.3	Takara SMART-Seq v4 Ultra Low Input RNA Kit Library Preparation	Nextera XT Index Kit: N704	TCCTGAGC	Nextera XT Index Kit: S517	TCTTACGC	MiSeq Nano	Paired End	150	1	16057	95.41	44885045	RNA-seq on Mouse E15.5 Skeletal Tissue	35
											NovaSeq S4	Paired End	100	1	24326036	93		RNA-seq on Mouse E15.5 Skeletal Tissue	35
											NovaSeq S4	Paired End	100	1	20542952	92.45		RNA-seq on Mouse E15.5 Skeletal Tissue	35
				FP5F	7.5	Takara SMART-Seq v4 Ultra Low Input RNA Kit Library Preparation	Nextera XT Index Kit: N705	GGACTCCT	Nextera XT Index Kit: S502	ATAGAGAG	MiSeq Nano	Paired End	150	1	13338	95.07	50721997	RNA-seq on Mouse E15.5 Skeletal Tissue	36
											NovaSeq S4	Paired End	100	1	28321822	93.44		RNA-seq on Mouse E15.5 Skeletal Tissue	36
											NovaSeq S4	Paired End	100	1	22386837	92.89		RNA-seq on Mouse E15.5 Skeletal Tissue	36
				FM1F	7	Takara SMART-Seq v4 Ultra Low Input RNA Kit Library Preparation	Nextera XT Index Kit: N705	GGACTCCT	Nextera XT Index Kit: S503	AGAGGATA	MiSeq Nano	Paired End	150	1	19855	94.13	55927771	RNA-seq on Mouse E15.5 Skeletal Tissue	37
											NovaSeq S4	Paired End	100	1	30140068	94.04		RNA-seq on Mouse E15.5 Skeletal Tissue	37
											NovaSeq S4	Paired End	100	1	25767848	93.67		RNA-seq on Mouse E15.5 Skeletal Tissue	37
				FM3F	7.1	Takara SMART-Seq v4 Ultra Low Input RNA Kit Library Preparation	Nextera XT Index Kit: N705	GGACTCCT	Nextera XT Index Kit: S504	AGAGGATA	MiSeq Nano	Paired End	150	1	16424	95.79	47335313	RNA-seq on Mouse E15.5 Skeletal Tissue	38
											NovaSeq S4	Paired End	100	1	26541755	93.82		RNA-seq on Mouse E15.5 Skeletal Tissue	38
											NovaSeq S4	Paired End	100	1	20777134	93.39		RNA-seq on Mouse E15.5 Skeletal Tissue	38
				FM5F	7.2	Takara SMART-Seq v4 Ultra Low Input RNA Kit Library Preparation	Nextera XT Index Kit: N705	GGACTCCT	Nextera XT Index Kit: S505	CTCCTTAC	MiSeq Nano	Paired End	150	1	13707	94.9	40272870	RNA-seq on Mouse E15.5 Skeletal Tissue	39
											NovaSeq S4	Paired End	100	1	22266356	91.96		RNA-seq on Mouse E15.5 Skeletal Tissue	39
											NovaSeq S4	Paired End	100	1	17992807	91.35		RNA-seq on Mouse E15.5 Skeletal Tissue	39
																			40
E15.5	G	Male	2022-05-05	HP1G	9.3	Takara SMART-Seq v4 Ultra Low Input RNA Kit Library Preparation	Nextera XT Index Kit: N705	GGACTCCT	Nextera XT Index Kit: S506	TATGCAGT	MiSeq Nano	Paired End	150	1	20191	95.1	56073819	RNA-seq on Mouse E15.5 Skeletal Tissue	41
											NovaSeq S4	Paired End	100	1	30926777	94.27		RNA-seq on Mouse E15.5 Skeletal Tissue	41
											NovaSeq S4	Paired End	100	1	25126851	93.88		RNA-seq on Mouse E15.5 Skeletal Tissue	41
				HP3G	9	Takara SMART-Seq v4 Ultra Low Input RNA Kit Library Preparation	Nextera XT Index Kit: N705	GGACTCCT	Nextera XT Index Kit: S507	TACTCCTT	MiSeq Nano	Paired End	150	1	18040	95.08	56116838	RNA-seq on Mouse E15.5 Skeletal Tissue	42
											NovaSeq S4	Paired End	100	1	30252893	94.06		RNA-seq on Mouse E15.5 Skeletal Tissue	42
											NovaSeq S4	Paired End	100	1	25845905	93.66		RNA-seq on Mouse E15.5 Skeletal Tissue	42
				HP5G	9.2	Takara SMART-Seq v4 Ultra Low Input RNA Kit Library Preparation	Nextera XT Index Kit: N705	GGACTCCT	Nextera XT Index Kit: S508	AGGCTTAG	MiSeq Nano	Paired End	150	1	12422	95.28	38514276	RNA-seq on Mouse E15.5 Skeletal Tissue	43
											NovaSeq S4	Paired End	100	1	21283062	93.48		RNA-seq on Mouse E15.5 Skeletal Tissue	43
											NovaSeq S4	Paired End	100	1	17218792	93.15		RNA-seq on Mouse E15.5 Skeletal Tissue	43
				HM1G	8.3	Takara SMART-Seq v4 Ultra Low Input RNA Kit Library Preparation	Nextera XT Index Kit: N705	GGACTCCT	Nextera XT Index Kit: S517	TCTTACGC	MiSeq Nano	Paired End	150	1	20335	94.46	55435395	RNA-seq on Mouse E15.5 Skeletal Tissue	44
											NovaSeq S4	Paired End	100	1	30891187	94.07		RNA-seq on Mouse E15.5 Skeletal Tissue	44
											NovaSeq S4	Paired End	100	1	24523873	93.73		RNA-seq on Mouse E15.5 Skeletal Tissue	44
				HM3G	8.7	Takara SMART-Seq v4 Ultra Low Input RNA Kit Library Preparation	Nextera XT Index Kit: N706	TAGGCATG	Nextera XT Index Kit: S502	ATAGAGAG	MiSeq Nano	Paired End	150	1	9916	94.03	34559716	RNA-seq on Mouse E15.5 Skeletal Tissue	45
											NovaSeq S4	Paired End	100	1	18597443	93.85		RNA-seq on Mouse E15.5 Skeletal Tissue	45
											NovaSeq S4	Paired End	100	1	15952357	93.37		RNA-seq on Mouse E15.5 Skeletal Tissue	45
				HM5G	9	Takara SMART-Seq v4 Ultra Low Input RNA Kit Library Preparation	Nextera XT Index Kit: N706	TAGGCATG	Nextera XT Index Kit: S503	AGAGGATA	MiSeq Nano	Paired End	150	1	15081	95.18	50014713	RNA-seq on Mouse E15.5 Skeletal Tissue	46
											NovaSeq S4	Paired End	100	1	26994959	93.4		RNA-seq on Mouse E15.5 Skeletal Tissue	46
											NovaSeq S4	Paired End	100	1	23004673	92.89		RNA-seq on Mouse E15.5 Skeletal Tissue	46
				FP1G	9.3	Takara SMART-Seq v4 Ultra Low Input RNA Kit Library Preparation	Nextera XT Index Kit: N706	TAGGCATG	Nextera XT Index Kit: S504	AGAGGATA	MiSeq Nano	Paired End	150	1	14263	95.79	46656565	RNA-seq on Mouse E15.5 Skeletal Tissue	47
											NovaSeq S4	Paired End	100	1	26172800	93.44		RNA-seq on Mouse E15.5 Skeletal Tissue	47
											NovaSeq S4	Paired End	100	1	20469502	92.98		RNA-seq on Mouse E15.5 Skeletal Tissue	47
				FP3G	8.9	Takara SMART-Seq v4 Ultra Low Input RNA Kit Library Preparation	Nextera XT Index Kit: N706	TAGGCATG	Nextera XT Index Kit: S505	CTCCTTAC	MiSeq Nano	Paired End	150	1	9428	94.91	33715561	RNA-seq on Mouse E15.5 Skeletal Tissue	48
											NovaSeq S4	Paired End	100	1	18632328	91.74		RNA-seq on Mouse E15.5 Skeletal Tissue	48
											NovaSeq S4	Paired End	100	1	15073805	91.05		RNA-seq on Mouse E15.5 Skeletal Tissue	48
				FP5G	8.8	Takara SMART-Seq v4 Ultra Low Input RNA Kit Library Preparation	Nextera XT Index Kit: N706	TAGGCATG	Nextera XT Index Kit: S506	TATGCAGT	MiSeq Nano	Paired End	150	1	12692	95.71	44217379	RNA-seq on Mouse E15.5 Skeletal Tissue	49
											NovaSeq S4	Paired End	100	1	24569857	93.03		RNA-seq on Mouse E15.5 Skeletal Tissue	49
											NovaSeq S4	Paired End	100	1	19634830	92.42		RNA-seq on Mouse E15.5 Skeletal Tissue	49
				FM1G	9.3	Takara SMART-Seq v4 Ultra Low Input RNA Kit Library Preparation	Nextera XT Index Kit: N706	TAGGCATG	Nextera XT Index Kit: S507	TACTCCTT	MiSeq Nano	Paired End	150	1	15987	95.15	57490946	RNA-seq on Mouse E15.5 Skeletal Tissue	50
											NovaSeq S4	Paired End	100	1	30894761	93.55		RNA-seq on Mouse E15.5 Skeletal Tissue	50
											NovaSeq S4	Paired End	100	1	26580198	93.09		RNA-seq on Mouse E15.5 Skeletal Tissue	50
				FM3G	8.8	Takara SMART-Seq v4 Ultra Low Input RNA Kit Library Preparation	Nextera XT Index Kit: N706	TAGGCATG	Nextera XT Index Kit: S508	AGGCTTAG	MiSeq Nano	Paired End	150	1	14523	95.38	50832512	RNA-seq on Mouse E15.5 Skeletal Tissue	51
											NovaSeq S4	Paired End	100	1	27728671	93.15		RNA-seq on Mouse E15.5 Skeletal Tissue	51
											NovaSeq S4	Paired End	100	1	23089318	92.66		RNA-seq on Mouse E15.5 Skeletal Tissue	51
				FM5G	8.9	Takara SMART-Seq v4 Ultra Low Input RNA Kit Library Preparation	Nextera XT Index Kit: N706	TAGGCATG	Nextera XT Index Kit: S517	TCTTACGC	MiSeq Nano	Paired End	150	1	14231	95.49	47617284	RNA-seq on Mouse E15.5 Skeletal Tissue	52
											NovaSeq S4	Paired End	100	1	26528181	93.16		RNA-seq on Mouse E15.5 Skeletal Tissue	52
											NovaSeq S4	Paired End	100	1	21074872	92.63		RNA-seq on Mouse E15.5 Skeletal Tissue	52
																			53
E15.5	H	Male	2022-05-05	HP1H	7	Takara SMART-Seq v4 Ultra Low Input RNA Kit Library Preparation	Nextera XT Index Kit: N707	CTCTCTAC	Nextera XT Index Kit: S502	ATAGAGAG	MiSeq Nano	Paired End	150	1	19497	92.16	61554715	RNA-seq on Mouse E15.5 Skeletal Tissue	54
											NovaSeq S4	Paired End	100	1	32873827	93.9		RNA-seq on Mouse E15.5 Skeletal Tissue	54
											NovaSeq S4	Paired End	100	1	28661391	93.54		RNA-seq on Mouse E15.5 Skeletal Tissue	54
				HP3H	8.2	Takara SMART-Seq v4 Ultra Low Input RNA Kit Library Preparation	Nextera XT Index Kit: N707	CTCTCTAC	Nextera XT Index Kit: S503	AGAGGATA	MiSeq Nano	Paired End	150	1	14179	95.79	48579269	RNA-seq on Mouse E15.5 Skeletal Tissue	55
											NovaSeq S4	Paired End	100	1	26164223	93.41		RNA-seq on Mouse E15.5 Skeletal Tissue	55
											NovaSeq S4	Paired End	100	1	22400867	92.86		RNA-seq on Mouse E15.5 Skeletal Tissue	55
				HP5H	8.3	Takara SMART-Seq v4 Ultra Low Input RNA Kit Library Preparation	Nextera XT Index Kit: N707	CTCTCTAC	Nextera XT Index Kit: S504	AGAGGATA	MiSeq Nano	Paired End	150	1	12741	96.25	43211176	RNA-seq on Mouse E15.5 Skeletal Tissue	56
											NovaSeq S4	Paired End	100	1	24200677	93.51		RNA-seq on Mouse E15.5 Skeletal Tissue	56
											NovaSeq S4	Paired End	100	1	18997758	93.01		RNA-seq on Mouse E15.5 Skeletal Tissue	56
				HM1H	Concentration too low to calculate RIN	Takara SMART-Seq v4 Ultra Low Input RNA Kit Library Preparation	Nextera XT Index Kit: N707	CTCTCTAC	Nextera XT Index Kit: S505	CTCCTTAC	MiSeq Nano	Paired End	150	1	13348	91.15	36598891	RNA-seq on Mouse E15.5 Skeletal Tissue	57
											NovaSeq S4	Paired End	100	1	19911482	93.61		RNA-seq on Mouse E15.5 Skeletal Tissue	57
											NovaSeq S4	Paired End	100	1	16674061	93.34		RNA-seq on Mouse E15.5 Skeletal Tissue	57
				HM3H	8.7	Takara SMART-Seq v4 Ultra Low Input RNA Kit Library Preparation	Nextera XT Index Kit: N707	CTCTCTAC	Nextera XT Index Kit: S506	TATGCAGT	MiSeq Nano	Paired End	150	1	13750	95.97	47100823	RNA-seq on Mouse E15.5 Skeletal Tissue	58
											NovaSeq S4	Paired End	100	1	26037173	93.77		RNA-seq on Mouse E15.5 Skeletal Tissue	58
											NovaSeq S4	Paired End	100	1	21049900	93.23		RNA-seq on Mouse E15.5 Skeletal Tissue	58
				HM5H	8	Takara SMART-Seq v4 Ultra Low Input RNA Kit Library Preparation	Nextera XT Index Kit: N707	CTCTCTAC	Nextera XT Index Kit: S507	TACTCCTT	MiSeq Nano	Paired End	150	1	16550	95.05	58769515	RNA-seq on Mouse E15.5 Skeletal Tissue	59
											NovaSeq S4	Paired End	100	1	31462972	94.13		RNA-seq on Mouse E15.5 Skeletal Tissue	59
											NovaSeq S4	Paired End	100	1	27289993	93.69		RNA-seq on Mouse E15.5 Skeletal Tissue	59
				FP1H	8.6	Takara SMART-Seq v4 Ultra Low Input RNA Kit Library Preparation	Nextera XT Index Kit: N707	CTCTCTAC	Nextera XT Index Kit: S508	AGGCTTAG	MiSeq Nano	Paired End	150	1	18999	95.21	62153654	RNA-seq on Mouse E15.5 Skeletal Tissue	60
											NovaSeq S4	Paired End	100	1	33680372	94.26		RNA-seq on Mouse E15.5 Skeletal Tissue	60
											NovaSeq S4	Paired End	100	1	28454283	93.89		RNA-seq on Mouse E15.5 Skeletal Tissue	60
				FP3H	8.5	Takara SMART-Seq v4 Ultra Low Input RNA Kit Library Preparation	Nextera XT Index Kit: N707	CTCTCTAC	Nextera XT Index Kit: S517	TCTTACGC	MiSeq Nano	Paired End	150	1	17660	95.98	56712779	RNA-seq on Mouse E15.5 Skeletal Tissue	61
											NovaSeq S4	Paired End	100	1	31376477	94.35		RNA-seq on Mouse E15.5 Skeletal Tissue	61
											NovaSeq S4	Paired End	100	1	25318642	93.93		RNA-seq on Mouse E15.5 Skeletal Tissue	61
				FP5H	8.6	Takara SMART-Seq v4 Ultra Low Input RNA Kit Library Preparation	Nextera XT Index Kit: N708	CAGAGAGG	Nextera XT Index Kit: S502	ATAGAGAG	MiSeq Nano	Paired End	150	1	19314	93.26	57981846	RNA-seq on Mouse E15.5 Skeletal Tissue	62
											NovaSeq S4	Paired End	100	1	31087657	94.21		RNA-seq on Mouse E15.5 Skeletal Tissue	62
											NovaSeq S4	Paired End	100	1	26874875	93.82		RNA-seq on Mouse E15.5 Skeletal Tissue	62
				FM1H	Concentration too low to calculate RIN	Takara SMART-Seq v4 Ultra Low Input RNA Kit Library Preparation	Nextera XT Index Kit: N708	CAGAGAGG	Nextera XT Index Kit: S503	AGAGGATA	MiSeq Nano	Paired End	150	1	16269	91.04	43329362	RNA-seq on Mouse E15.5 Skeletal Tissue	63
											NovaSeq S4	Paired End	100	1	23223981	93.34		RNA-seq on Mouse E15.5 Skeletal Tissue	63
											NovaSeq S4	Paired End	100	1	20089112	93.08		RNA-seq on Mouse E15.5 Skeletal Tissue	63
				FM3H	8.2	Takara SMART-Seq v4 Ultra Low Input RNA Kit Library Preparation	Nextera XT Index Kit: N708	CAGAGAGG	Nextera XT Index Kit: S504	AGAGGATA	MiSeq Nano	Paired End	150	1	11456	95.8	36932785	RNA-seq on Mouse E15.5 Skeletal Tissue	64
											NovaSeq S4	Paired End	100	1	20776623	92.6		RNA-seq on Mouse E15.5 Skeletal Tissue	64
											NovaSeq S4	Paired End	100	1	16144706	92.04		RNA-seq on Mouse E15.5 Skeletal Tissue	64
				FM5H	8.5	Takara SMART-Seq v4 Ultra Low Input RNA Kit Library Preparation	Nextera XT Index Kit: N708	CAGAGAGG	Nextera XT Index Kit: S505	CTCCTTAC	MiSeq Nano	Paired End	150	1	16506	93.83	45952506	RNA-seq on Mouse E15.5 Skeletal Tissue	65
											NovaSeq S4	Paired End	100	1	25232275	93.92		RNA-seq on Mouse E15.5 Skeletal Tissue	65
											NovaSeq S4	Paired End	100	1	20703725	93.51		RNA-seq on Mouse E15.5 Skeletal Tissue	65
																			66
E15.5	I	Female	2022-05-06	HP1I	8.2	Takara SMART-Seq v4 Ultra Low Input RNA Kit Library Preparation	Nextera XT Index Kit: N708	CAGAGAGG	Nextera XT Index Kit: S506	TATGCAGT	MiSeq Nano	Paired End	150	1	17911	95.1	53324710	RNA-seq on Mouse E15.5 Skeletal Tissue	67
											NovaSeq S4	Paired End	100	1	29417259	93.76		RNA-seq on Mouse E15.5 Skeletal Tissue	67
											NovaSeq S4	Paired End	100	1	23889540	93.3		RNA-seq on Mouse E15.5 Skeletal Tissue	67
				HP3I	8.7	Takara SMART-Seq v4 Ultra Low Input RNA Kit Library Preparation	Nextera XT Index Kit: N708	CAGAGAGG	Nextera XT Index Kit: S507	TACTCCTT	MiSeq Nano	Paired End	150	1	13657	95.1	47475680	RNA-seq on Mouse E15.5 Skeletal Tissue	68
											NovaSeq S4	Paired End	100	1	25563343	93.4		RNA-seq on Mouse E15.5 Skeletal Tissue	68
											NovaSeq S4	Paired End	100	1	21898680	92.88		RNA-seq on Mouse E15.5 Skeletal Tissue	68
				HP5I	9.1	Takara SMART-Seq v4 Ultra Low Input RNA Kit Library Preparation	Nextera XT Index Kit: N708	CAGAGAGG	Nextera XT Index Kit: S508	AGGCTTAG	MiSeq Nano	Paired End	150	1	16385	94.62	51234381	RNA-seq on Mouse E15.5 Skeletal Tissue	69
											NovaSeq S4	Paired End	100	1	27952097	93.51		RNA-seq on Mouse E15.5 Skeletal Tissue	69
											NovaSeq S4	Paired End	100	1	23265899	93.09		RNA-seq on Mouse E15.5 Skeletal Tissue	69
				HM1I	8.8	Takara SMART-Seq v4 Ultra Low Input RNA Kit Library Preparation	Nextera XT Index Kit: N708	CAGAGAGG	Nextera XT Index Kit: S517	TCTTACGC	MiSeq Nano	Paired End	150	1	15969	95.55	49734583	RNA-seq on Mouse E15.5 Skeletal Tissue	70
											NovaSeq S4	Paired End	100	1	27662978	93.74		RNA-seq on Mouse E15.5 Skeletal Tissue	70
											NovaSeq S4	Paired End	100	1	22055636	93.27		RNA-seq on Mouse E15.5 Skeletal Tissue	70
				HM3I	8.6	Takara SMART-Seq v4 Ultra Low Input RNA Kit Library Preparation	Nextera XT Index Kit: N709	GCTACGCT	Nextera XT Index Kit: S502	ATAGAGAG	MiSeq Nano	Paired End	150	1	14554	94.81	46240257	RNA-seq on Mouse E15.5 Skeletal Tissue	71
											NovaSeq S4	Paired End	100	1	24953142	93.16		RNA-seq on Mouse E15.5 Skeletal Tissue	71
											NovaSeq S4	Paired End	100	1	21272561	92.58		RNA-seq on Mouse E15.5 Skeletal Tissue	71
				HM5I	8.6	Takara SMART-Seq v4 Ultra Low Input RNA Kit Library Preparation	Nextera XT Index Kit: N709	GCTACGCT	Nextera XT Index Kit: S503	AGAGGATA	MiSeq Nano	Paired End	150	1	11847	96.09	38002537	RNA-seq on Mouse E15.5 Skeletal Tissue	72
											NovaSeq S4	Paired End	100	1	20609573	93.56		RNA-seq on Mouse E15.5 Skeletal Tissue	72
											NovaSeq S4	Paired End	100	1	17381117	92.98		RNA-seq on Mouse E15.5 Skeletal Tissue	72
				FP1I	9	Takara SMART-Seq v4 Ultra Low Input RNA Kit Library Preparation	Nextera XT Index Kit: N709	GCTACGCT	Nextera XT Index Kit: S504	AGAGGATA	MiSeq Nano	Paired End	150	1	11399	95.88	35884331	RNA-seq on Mouse E15.5 Skeletal Tissue	73
											NovaSeq S4	Paired End	100	1	20155034	92.97		RNA-seq on Mouse E15.5 Skeletal Tissue	73
											NovaSeq S4	Paired End	100	1	15717898	92.39		RNA-seq on Mouse E15.5 Skeletal Tissue	73
				FP3I	8.9	Takara SMART-Seq v4 Ultra Low Input RNA Kit Library Preparation	Nextera XT Index Kit: N709	GCTACGCT	Nextera XT Index Kit: S505	CTCCTTAC	MiSeq Nano	Paired End	150	1	13339	94.36	38363645	RNA-seq on Mouse E15.5 Skeletal Tissue	74
											NovaSeq S4	Paired End	100	1	21211112	93.25		RNA-seq on Mouse E15.5 Skeletal Tissue	74
											NovaSeq S4	Paired End	100	1	17139194	92.76		RNA-seq on Mouse E15.5 Skeletal Tissue	74
				FP5I	8.4	Takara SMART-Seq v4 Ultra Low Input RNA Kit Library Preparation	Nextera XT Index Kit: N709	GCTACGCT	Nextera XT Index Kit: S506	TATGCAGT	MiSeq Nano	Paired End	150	1	17995	94.97	48644900	RNA-seq on Mouse E15.5 Skeletal Tissue	75
											NovaSeq S4	Paired End	100	1	26878341	93.95		RNA-seq on Mouse E15.5 Skeletal Tissue	75
											NovaSeq S4	Paired End	100	1	21748564	93.47		RNA-seq on Mouse E15.5 Skeletal Tissue	75
				FM1I	8.5	Takara SMART-Seq v4 Ultra Low Input RNA Kit Library Preparation	Nextera XT Index Kit: N709	GCTACGCT	Nextera XT Index Kit: S507	TACTCCTT	MiSeq Nano	Paired End	150	1	16756	93.92	51396523	RNA-seq on Mouse E15.5 Skeletal Tissue	76
											NovaSeq S4	Paired End	100	1	27552860	94.31		RNA-seq on Mouse E15.5 Skeletal Tissue	76
											NovaSeq S4	Paired End	100	1	23826907	93.92		RNA-seq on Mouse E15.5 Skeletal Tissue	76
				FM3I	7.9	Takara SMART-Seq v4 Ultra Low Input RNA Kit Library Preparation	Nextera XT Index Kit: N709	GCTACGCT	Nextera XT Index Kit: S508	AGGCTTAG	MiSeq Nano	Paired End	150	1	11915	95.31	38871150	RNA-seq on Mouse E15.5 Skeletal Tissue	77
											NovaSeq S4	Paired End	100	1	21385107	93.28		RNA-seq on Mouse E15.5 Skeletal Tissue	77
											NovaSeq S4	Paired End	100	1	17474128	92.84		RNA-seq on Mouse E15.5 Skeletal Tissue	77
				FM5I	8.9	Takara SMART-Seq v4 Ultra Low Input RNA Kit Library Preparation	Nextera XT Index Kit: N709	GCTACGCT	Nextera XT Index Kit: S517	TCTTACGC	MiSeq Nano	Paired End	150	1	14012	95.89	45065836	RNA-seq on Mouse E15.5 Skeletal Tissue	78
											NovaSeq S4	Paired End	100	1	25243466	93.46		RNA-seq on Mouse E15.5 Skeletal Tissue	78
											NovaSeq S4	Paired End	100	1	19808358	92.91		RNA-seq on Mouse E15.5 Skeletal Tissue	78

## Sheet: Pairwise DEGs
ensembl_gene_id	baseMean	log2FoldChange	lfcSE	stat	pvalue	padj	mgi_symbol	tissue1	tissue2
ENSMUSG00000001823	526.665	5.50344	0.204577	26.9016	2.10615e-159	4.18175e-155	Hoxd12	HANDPHALANGES1	HANDPHALANGES3
ENSMUSG00000042499	449.748	5.12753	0.275007	18.6451	1.38493e-77	1.37488e-73	Hoxd11	HANDPHALANGES1	HANDPHALANGES3
ENSMUSG00000007888	4616.56	-1.50988	0.0840423	-17.9657	3.61529e-72	2.39272e-68	Crlf1	HANDPHALANGES1	HANDPHALANGES3
ENSMUSG00000028031	2957.13	1.70355	0.0949595	17.9398	5.76789e-72	2.86304e-68	Dkk2	HANDPHALANGES1	HANDPHALANGES3
ENSMUSG00000050368	351.86	4.9386	0.294775	16.7538	5.31246e-63	2.10958e-59	Hoxd10	HANDPHALANGES1	HANDPHALANGES3
ENSMUSG00000040170	294.633	2.83987	0.171102	16.5975	7.2637e-62	2.40368e-58	Fmo2	HANDPHALANGES1	HANDPHALANGES3
ENSMUSG00000013584	441.71	3.14017	0.19269	16.2965	1.04572e-59	2.96612e-56	Aldh1a2	HANDPHALANGES1	HANDPHALANGES3
ENSMUSG00000011118	1069.67	3.19434	0.201853	15.8251	2.08796e-56	5.18206e-53	Panx3	HANDPHALANGES1	HANDPHALANGES3
ENSMUSG00000068859	474.909	-4.16657	0.2812	-14.8171	1.13576e-49	2.50561e-46	Sp9	HANDPHALANGES1	HANDPHALANGES3
ENSMUSG00000027868	964.465	2.42237	0.163813	14.7874	1.76594e-49	3.50627e-46	Tbx15	HANDPHALANGES1	HANDPHALANGES3
ENSMUSG00000026109	652.94	2.2472	0.157961	14.2263	6.2941e-46	1.13609e-42	Tmeff2	HANDPHALANGES1	HANDPHALANGES3
ENSMUSG00000018263	1864.9	-1.33967	0.0961409	-13.9345	3.91151e-44	6.47192e-41	Tbx5	HANDPHALANGES1	HANDPHALANGES3
ENSMUSG00000034435	1180.66	2.82638	0.20519	13.7745	3.63128e-43	5.54608e-40	Tmem30b	HANDPHALANGES1	HANDPHALANGES3
ENSMUSG00000006538	1996.3	1.5691	0.114633	13.688	1.19723e-42	1.69793e-39	Ihh	HANDPHALANGES1	HANDPHALANGES3
ENSMUSG00000026344	414.373	-2.16085	0.157943	-13.6813	1.31379e-42	1.73902e-39	Lypd1	HANDPHALANGES1	HANDPHALANGES3
ENSMUSG00000026365	788.208	3.1413	0.237194	13.2436	4.9124e-40	6.09599e-37	Cfh	HANDPHALANGES1	HANDPHALANGES3
ENSMUSG00000020218	3767.68	-1.07383	0.0840962	-12.7691	2.4401e-37	2.84989e-34	Wif1	HANDPHALANGES1	HANDPHALANGES3
ENSMUSG00000039462	843.418	2.64193	0.210943	12.5244	5.4896e-36	6.05533e-33	Col10a1	HANDPHALANGES1	HANDPHALANGES3
ENSMUSG00000022860	1224.86	2.68216	0.22377	11.9863	4.1941e-33	4.38283e-30	Chodl	HANDPHALANGES1	HANDPHALANGES3
ENSMUSG00000056222	225.188	3.26026	0.277114	11.7651	5.90833e-32	5.8655e-29	Spock1	HANDPHALANGES1	HANDPHALANGES3
ENSMUSG00000018604	404.015	-1.91743	0.166012	-11.5499	7.38668e-31	6.98393e-28	Tbx3	HANDPHALANGES1	HANDPHALANGES3
ENSMUSG00000042254	368.104	3.37849	0.295559	11.4308	2.93227e-30	2.64637e-27	Cilp	HANDPHALANGES1	HANDPHALANGES3
ENSMUSG00000058806	445.893	-2.55083	0.225287	-11.3226	1.0144e-29	8.75696e-27	Col13a1	HANDPHALANGES1	HANDPHALANGES3
ENSMUSG00000061762	615.414	-2.82824	0.250894	-11.2727	1.7909e-29	1.4816e-26	Tac1	HANDPHALANGES1	HANDPHALANGES3
ENSMUSG00000102070	820.667	11.0918	0.98521	11.2583	2.10723e-29	1.67356e-26	Gm28661	HANDPHALANGES1	HANDPHALANGES3
ENSMUSG00000020467	689.921	2.17072	0.19363	11.2107	3.6147e-29	2.76038e-26	Efemp1	HANDPHALANGES1	HANDPHALANGES3
ENSMUSG00000024647	555.46	2.18167	0.196433	11.1065	1.16675e-28	8.57996e-26	Cbln2	HANDPHALANGES1	HANDPHALANGES3
ENSMUSG00000026343	245.443	-2.19456	0.200436	-10.9489	6.72429e-28	4.76824e-25	Gpr39	HANDPHALANGES1	HANDPHALANGES3
ENSMUSG00000032327	281.445	3.83117	0.350031	10.9452	7.00345e-28	4.79495e-25	Stra6	HANDPHALANGES1	HANDPHALANGES3
ENSMUSG00000032419	1233.5	-1.37951	0.127	-10.8623	1.74292e-27	1.15352e-24	Tbx18	HANDPHALANGES1	HANDPHALANGES3
ENSMUSG00000031906	282.194	3.4185	0.31695	10.7856	4.02505e-27	2.49742e-24	Smpd3	HANDPHALANGES1	HANDPHALANGES3
ENSMUSG00000106795	367.778	-2.07537	0.192372	-10.7883	3.90859e-27	2.49742e-24	Gm43050	HANDPHALANGES1	HANDPHALANGES3
ENSMUSG00000039114	423.096	-1.83932	0.170961	-10.7587	5.394e-27	3.24539e-24	Nrn1	HANDPHALANGES1	HANDPHALANGES3
ENSMUSG00000063600	947.956	-2.61804	0.245011	-10.6854	1.19145e-26	6.95772e-24	Egfem1	HANDPHALANGES1	HANDPHALANGES3
ENSMUSG00000021703	1203.22	1.69414	0.158869	10.6638	1.50388e-26	8.5313e-24	Serinc5	HANDPHALANGES1	HANDPHALANGES3
ENSMUSG00000050663	266.275	3.75793	0.358635	10.4784	1.08549e-25	5.98677e-23	Trhde	HANDPHALANGES1	HANDPHALANGES3
ENSMUSG00000028487	642.162	1.72115	0.164731	10.4483	1.49222e-25	8.00755e-23	Bnc2	HANDPHALANGES1	HANDPHALANGES3
ENSMUSG00000038156	1119.13	1.59311	0.154037	10.3424	4.53215e-25	2.36805e-22	Spon1	HANDPHALANGES1	HANDPHALANGES3
ENSMUSG00000028073	579.727	1.31395	0.127456	10.3091	6.41236e-25	3.18294e-22	Pear1	HANDPHALANGES1	HANDPHALANGES3
ENSMUSG00000036256	2686.2	-1.41597	0.137331	-10.3106	6.3113e-25	3.18294e-22	Igfbp7	HANDPHALANGES1	HANDPHALANGES3
ENSMUSG00000102697	371.821	-1.66652	0.162934	-10.2282	1.48233e-24	7.17847e-22	Pcdhac2	HANDPHALANGES1	HANDPHALANGES3
ENSMUSG00000034755	649.062	1.84429	0.181838	10.1425	3.57874e-24	1.69181e-21	Pcdh11x	HANDPHALANGES1	HANDPHALANGES3
ENSMUSG00000015568	466.653	1.53913	0.151986	10.1268	4.2038e-24	1.94108e-21	Lpl	HANDPHALANGES1	HANDPHALANGES3
ENSMUSG00000054162	287.899	2.1177	0.209262	10.1198	4.51292e-24	2.03646e-21	Spock3	HANDPHALANGES1	HANDPHALANGES3
ENSMUSG00000064360	1426.86	-1.69686	0.16798	-10.1015	5.43962e-24	2.40008e-21	mt-Nd3	HANDPHALANGES1	HANDPHALANGES3
ENSMUSG00000050875	206.945	-1.77716	0.176751	-10.0546	8.76833e-24	3.78468e-21	Minar2	HANDPHALANGES1	HANDPHALANGES3
ENSMUSG00000100510	315.732	2.06571	0.206611	9.99807	1.55392e-23	6.56451e-21	Hand2os1	HANDPHALANGES1	HANDPHALANGES3
ENSMUSG00000029335	418.885	2.65884	0.268088	9.91778	3.48421e-23	1.44123e-20	Bmp3	HANDPHALANGES1	HANDPHALANGES3
ENSMUSG00000035653	183.808	2.82295	0.288119	9.79785	1.15007e-22	4.66013e-20	Lrfn5	HANDPHALANGES1	HANDPHALANGES3
ENSMUSG00000028496	1376.4	-1.00404	0.102957	-9.75204	1.80797e-22	7.17945e-20	Mllt3	HANDPHALANGES1	HANDPHALANGES3
ENSMUSG00000049791	1104.57	1.4717	0.151287	9.72789	2.29305e-22	8.92718e-20	Fzd4	HANDPHALANGES1	HANDPHALANGES3
ENSMUSG00000026043	60148.9	1.13418	0.116783	9.71184	2.68445e-22	1.02499e-19	Col3a1	HANDPHALANGES1	HANDPHALANGES3
ENSMUSG00000004040	2709.31	0.999398	0.103028	9.70025	3.00759e-22	1.12671e-19	Stat3	HANDPHALANGES1	HANDPHALANGES3
ENSMUSG00000025478	547.163	1.54205	0.160794	9.59027	8.78569e-22	3.23037e-19	Dpysl4	HANDPHALANGES1	HANDPHALANGES3
ENSMUSG00000036782	3353.28	1.22832	0.128448	9.56276	1.14657e-21	4.13912e-19	Klhl13	HANDPHALANGES1	HANDPHALANGES3
ENSMUSG00000120759	255.335	-8.93479	0.936203	-9.54364	1.37901e-21	4.88932e-19	Gm57290	HANDPHALANGES1	HANDPHALANGES3
ENSMUSG00000022887	237.817	1.88016	0.200018	9.39992	5.46021e-21	1.90197e-18	Masp1	HANDPHALANGES1	HANDPHALANGES3
ENSMUSG00000062960	913.393	1.04907	0.111955	9.37044	7.22342e-21	2.47277e-18	Kdr	HANDPHALANGES1	HANDPHALANGES3
ENSMUSG00000038587	490.613	1.27844	0.138264	9.24635	2.3228e-20	7.8168e-18	Akap12	HANDPHALANGES1	HANDPHALANGES3
ENSMUSG00000023885	2956.15	1.32778	0.144887	9.16426	4.98868e-20	1.65084e-17	Thbs2	HANDPHALANGES1	HANDPHALANGES3
ENSMUSG00000064339	20208.2	-1.43161	0.156434	-9.15151	5.61412e-20	1.82735e-17	mt-Rnr2	HANDPHALANGES1	HANDPHALANGES3
ENSMUSG00000037335	70.9529	-6.85131	0.758955	-9.02729	1.75982e-19	5.63569e-17	Hand1	HANDPHALANGES1	HANDPHALANGES3
ENSMUSG00000057777	200.37	2.06902	0.229513	9.0148	1.97223e-19	6.21566e-17	Mab21l2	HANDPHALANGES1	HANDPHALANGES3
ENSMUSG00000094777	8099.76	-1.66645	0.185189	-8.99863	2.28551e-19	7.09045e-17	H2ac24	HANDPHALANGES1	HANDPHALANGES3
ENSMUSG00000062329	9941.04	-1.21283	0.134908	-8.99005	2.47114e-19	7.54839e-17	Cytl1	HANDPHALANGES1	HANDPHALANGES3
ENSMUSG00000026443	185.569	1.65681	0.185476	8.93272	4.15668e-19	1.25047e-16	Lrrn2	HANDPHALANGES1	HANDPHALANGES3
ENSMUSG00000040181	460.373	1.87013	0.210229	8.89569	5.80554e-19	1.72043e-16	Fmo1	HANDPHALANGES1	HANDPHALANGES3
ENSMUSG00000029546	39.1272	-8.51777	0.962502	-8.84961	8.78252e-19	2.56437e-16	Uncx	HANDPHALANGES1	HANDPHALANGES3
ENSMUSG00000005397	6393.14	0.960867	0.108653	8.84342	9.28342e-19	2.67134e-16	Nid1	HANDPHALANGES1	HANDPHALANGES3
ENSMUSG00000028234	2876.17	-1.61897	0.183232	-8.83563	9.95385e-19	2.82334e-16	Rps20	HANDPHALANGES1	HANDPHALANGES3
ENSMUSG00000021756	1810.65	1.0557	0.119825	8.8104	1.24697e-18	3.48713e-16	Il6st	HANDPHALANGES1	HANDPHALANGES3
ENSMUSG00000025362	2812.29	-1.58553	0.181059	-8.75698	2.00555e-18	5.53057e-16	Rps26	HANDPHALANGES1	HANDPHALANGES3
ENSMUSG00000028464	1203.34	-1.09509	0.125175	-8.74849	2.16231e-18	5.8812e-16	Tpm2	HANDPHALANGES1	HANDPHALANGES3
ENSMUSG00000000392	595.318	1.16703	0.133687	8.72955	2.55691e-18	6.86045e-16	Fap	HANDPHALANGES1	HANDPHALANGES3
ENSMUSG00000026193	4352.35	1.09162	0.125176	8.7207	2.76493e-18	7.31968e-16	Fn1	HANDPHALANGES1	HANDPHALANGES3
ENSMUSG00000042256	298.017	5.33055	0.612562	8.70205	3.2593e-18	8.51493e-16	Ptchd4	HANDPHALANGES1	HANDPHALANGES3
ENSMUSG00000046330	4668.45	-1.56191	0.179924	-8.68098	3.92367e-18	1.01175e-15	Rpl37a	HANDPHALANGES1	HANDPHALANGES3
ENSMUSG00000031285	876.126	-1.60559	0.185389	-8.66068	4.68943e-18	1.1937e-15	Dcx	HANDPHALANGES1	HANDPHALANGES3
ENSMUSG00000024529	4660.52	1.35387	0.156738	8.63775	5.73311e-18	1.42289e-15	Lox	HANDPHALANGES1	HANDPHALANGES3
ENSMUSG00000052726	126.373	2.36304	0.273537	8.63883	5.67928e-18	1.42289e-15	Kcnt2	HANDPHALANGES1	HANDPHALANGES3
ENSMUSG00000001819	2947.05	0.803494	0.0931343	8.62726	6.28387e-18	1.54033e-15	Hoxd13	HANDPHALANGES1	HANDPHALANGES3
ENSMUSG00000000402	1514.57	1.90405	0.221482	8.59687	8.19201e-18	1.98356e-15	Egfl6	HANDPHALANGES1	HANDPHALANGES3
ENSMUSG00000021381	660.796	-1.62939	0.189573	-8.59506	8.32246e-18	1.99087e-15	Barx1	HANDPHALANGES1	HANDPHALANGES3
ENSMUSG00000024304	870.243	1.53695	0.178848	8.59362	8.4268e-18	1.99183e-15	Cdh2	HANDPHALANGES1	HANDPHALANGES3
ENSMUSG00000036040	387.327	1.62753	0.189632	8.58258	9.27685e-18	2.16696e-15	Adamtsl2	HANDPHALANGES1	HANDPHALANGES3
ENSMUSG00000090733	4024.99	-1.5984	0.187044	-8.54555	1.27921e-17	2.95334e-15	Rps27	HANDPHALANGES1	HANDPHALANGES3
ENSMUSG00000040690	5813.03	0.780709	0.0916903	8.51463	1.67127e-17	3.81415e-15	Col16a1	HANDPHALANGES1	HANDPHALANGES3
ENSMUSG00000100303	136.941	-2.63724	0.310886	-8.48301	2.19449e-17	4.95131e-15	2600014E21Rik	HANDPHALANGES1	HANDPHALANGES3
ENSMUSG00000009927	5285.47	-1.31328	0.154975	-8.47415	2.36807e-17	5.28292e-15	Rps25	HANDPHALANGES1	HANDPHALANGES3
ENSMUSG00000016918	10094.6	1.16059	0.13744	8.44437	3.05678e-17	6.7436e-15	Sulf1	HANDPHALANGES1	HANDPHALANGES3
ENSMUSG00000078193	1228.44	-1.40251	0.167281	-8.38417	5.1087e-17	1.11465e-14	Rpl35rt	HANDPHALANGES1	HANDPHALANGES3
ENSMUSG00000014603	543.131	-2.18767	0.261158	-8.37681	5.43836e-17	1.17368e-14	Alx3	HANDPHALANGES1	HANDPHALANGES3
ENSMUSG00000050856	671.241	-1.58471	0.189756	-8.35131	6.75079e-17	1.44126e-14	Atp5me	HANDPHALANGES1	HANDPHALANGES3
ENSMUSG00000028289	2805.39	1.47221	0.176517	8.34034	7.40784e-17	1.55643e-14	Epha7	HANDPHALANGES1	HANDPHALANGES3
ENSMUSG00000057322	1517.93	-1.59424	0.191162	-8.33971	7.44701e-17	1.55643e-14	Rpl38	HANDPHALANGES1	HANDPHALANGES3
ENSMUSG00000021047	76.1971	4.01787	0.481893	8.33768	7.57613e-17	1.56692e-14	Nova1	HANDPHALANGES1	HANDPHALANGES3
ENSMUSG00000118841	827.86	-1.81365	0.217825	-8.32616	8.35101e-17	1.69193e-14	Rn7s2	HANDPHALANGES1	HANDPHALANGES3
ENSMUSG00000118866	827.86	-1.81365	0.217825	-8.32616	8.35101e-17	1.69193e-14	Rn7s1	HANDPHALANGES1	HANDPHALANGES3
ENSMUSG00000058546	5433.89	-1.36586	0.164805	-8.28773	1.15433e-16	2.31508e-14	Rpl23a	HANDPHALANGES1	HANDPHALANGES3
ENSMUSG00000061787	3466.82	-1.34997	0.163215	-8.27112	1.32709e-16	2.63494e-14	Rps17	HANDPHALANGES1	HANDPHALANGES3
ENSMUSG00000030551	406.163	1.10996	0.134373	8.2603	1.45311e-16	2.77419e-14	Nr2f2	HANDPHALANGES1	HANDPHALANGES3
ENSMUSG00000034892	2600.01	-1.57722	0.190934	-8.26055	1.45008e-16	2.77419e-14	Rps29	HANDPHALANGES1	HANDPHALANGES3
ENSMUSG00000041548	828.828	-1.76646	0.213839	-8.26073	1.44786e-16	2.77419e-14	Hspb8	HANDPHALANGES1	HANDPHALANGES3
ENSMUSG00000068220	8048.57	-1.33295	0.161319	-8.26279	1.42306e-16	2.77419e-14	Lgals1	HANDPHALANGES1	HANDPHALANGES3
ENSMUSG00000051065	452.109	1.07238	0.130119	8.24156	1.69978e-16	3.2142e-14	Mb21d2	HANDPHALANGES1	HANDPHALANGES3
ENSMUSG00000037820	668.252	1.50069	0.182739	8.21222	2.17129e-16	3.97397e-14	Tgm2	HANDPHALANGES1	HANDPHALANGES3
ENSMUSG00000093931	46.8563	7.26139	0.884279	8.21165	2.18163e-16	3.97397e-14	Amy2a3	HANDPHALANGES1	HANDPHALANGES3
ENSMUSG00000096569	46.8563	7.26139	0.884279	8.21165	2.18163e-16	3.97397e-14	Amy2a2	HANDPHALANGES1	HANDPHALANGES3
ENSMUSG00000096770	46.8563	7.26139	0.884279	8.21165	2.18163e-16	3.97397e-14	Amy2a4	HANDPHALANGES1	HANDPHALANGES3
ENSMUSG00000019936	817.206	1.17375	0.143303	8.19069	2.59739e-16	4.68829e-14	Epyc	HANDPHALANGES1	HANDPHALANGES3
ENSMUSG00000019230	1854.51	-0.966793	0.118076	-8.18786	2.65903e-16	4.75631e-14	Lhx9	HANDPHALANGES1	HANDPHALANGES3
ENSMUSG00000057841	5962.39	-1.38912	0.169929	-8.17469	2.96629e-16	5.25854e-14	Rpl32	HANDPHALANGES1	HANDPHALANGES3
ENSMUSG00000025921	3308.33	1.163	0.142476	8.16276	3.27465e-16	5.71305e-14	Rdh10	HANDPHALANGES1	HANDPHALANGES3
ENSMUSG00000049517	5043.09	-1.37259	0.168157	-8.16255	3.28022e-16	5.71305e-14	Rps23	HANDPHALANGES1	HANDPHALANGES3
ENSMUSG00000062997	4008.95	-1.50387	0.184783	-8.13855	4.00049e-16	6.90694e-14	Rpl35	HANDPHALANGES1	HANDPHALANGES3
ENSMUSG00000041324	1161.04	-0.893345	0.109816	-8.13496	4.12085e-16	7.0534e-14	Inhba	HANDPHALANGES1	HANDPHALANGES3
ENSMUSG00000021466	3538.83	0.67195	0.0826356	8.13147	4.24105e-16	7.1971e-14	Ptch1	HANDPHALANGES1	HANDPHALANGES3
ENSMUSG00000120008	48.532	-3.75994	0.462796	-8.1244	4.49578e-16	7.56472e-14	Gm56822	HANDPHALANGES1	HANDPHALANGES3
ENSMUSG00000052276	73.9902	3.5078	0.432266	8.11492	4.86085e-16	8.11027e-14	Ostn	HANDPHALANGES1	HANDPHALANGES3
ENSMUSG00000053117	112.068	2.78618	0.343946	8.10062	5.46793e-16	8.97238e-14	E330013P04Rik	HANDPHALANGES1	HANDPHALANGES3
ENSMUSG00000060143	796.052	-1.50237	0.185463	-8.10065	5.46681e-16	8.97238e-14	Gm10076	HANDPHALANGES1	HANDPHALANGES3
ENSMUSG00000067288	1671.6	-1.47083	0.182182	-8.07341	6.83635e-16	1.11259e-13	Rps28	HANDPHALANGES1	HANDPHALANGES3
ENSMUSG00000059325	235.826	-2.50719	0.311099	-8.05915	7.6826e-16	1.24015e-13	Hopx	HANDPHALANGES1	HANDPHALANGES3
ENSMUSG00000039208	790.383	-0.940484	0.116876	-8.04686	8.49471e-16	1.36018e-13	Metrnl	HANDPHALANGES1	HANDPHALANGES3
ENSMUSG00000093674	6325.93	-1.40314	0.174448	-8.04332	8.7437e-16	1.38885e-13	Rpl41	HANDPHALANGES1	HANDPHALANGES3
ENSMUSG00000074129	5400.28	-1.42601	0.177367	-8.03988	8.993e-16	1.41711e-13	Rpl13a	HANDPHALANGES1	HANDPHALANGES3
ENSMUSG00000063457	2659.32	-1.39292	0.174064	-8.00235	1.22071e-15	1.90843e-13	Rps15	HANDPHALANGES1	HANDPHALANGES3
ENSMUSG00000018822	76.4782	-2.42261	0.303192	-7.99035	1.34558e-15	2.08722e-13	Sfrp5	HANDPHALANGES1	HANDPHALANGES3
ENSMUSG00000040952	10740.1	-1.2887	0.161473	-7.98087	1.45302e-15	2.23642e-13	Rps19	HANDPHALANGES1	HANDPHALANGES3
ENSMUSG00000061477	3671.79	-1.35735	0.170228	-7.97372	1.53974e-15	2.35165e-13	Rps7	HANDPHALANGES1	HANDPHALANGES3
ENSMUSG00000037563	3504.25	-1.36863	0.172367	-7.94022	2.0183e-15	3.05903e-13	Rps16	HANDPHALANGES1	HANDPHALANGES3
ENSMUSG00000063564	1481.23	1.26495	0.159463	7.93257	2.14662e-15	3.22887e-13	Col23a1	HANDPHALANGES1	HANDPHALANGES3
ENSMUSG00000022425	4492.61	1.22002	0.153825	7.93125	2.16959e-15	3.23889e-13	Enpp2	HANDPHALANGES1	HANDPHALANGES3
ENSMUSG00000057863	2739.65	-1.56039	0.196873	-7.92586	2.26571e-15	3.35714e-13	Rpl36	HANDPHALANGES1	HANDPHALANGES3
ENSMUSG00000079641	1538.93	-1.58901	0.201126	-7.90057	2.77639e-15	4.08334e-13	Rpl39	HANDPHALANGES1	HANDPHALANGES3
ENSMUSG00000008682	9960.03	-1.03333	0.130835	-7.89796	2.83509e-15	4.13902e-13	Rpl10	HANDPHALANGES1	HANDPHALANGES3
ENSMUSG00000098274	3441.41	-1.33736	0.169558	-7.88733	3.08731e-15	4.47435e-13	Rpl24	HANDPHALANGES1	HANDPHALANGES3
ENSMUSG00000036478	6102.11	-0.664171	0.0843154	-7.87722	3.34741e-15	4.81615e-13	Btg1	HANDPHALANGES1	HANDPHALANGES3
ENSMUSG00000027133	1449.01	-1.09326	0.139068	-7.86133	3.80075e-15	5.39028e-13	Nop10	HANDPHALANGES1	HANDPHALANGES3
ENSMUSG00000090137	4663.39	-1.45055	0.184504	-7.86187	3.78437e-15	5.39028e-13	Uba52	HANDPHALANGES1	HANDPHALANGES3
ENSMUSG00000025969	1679.91	1.29963	0.165452	7.85504	3.99655e-15	5.62776e-13	Nrp2	HANDPHALANGES1	HANDPHALANGES3
ENSMUSG00000041841	2425.87	-1.46684	0.186904	-7.84812	4.22305e-15	5.90484e-13	Rpl37	HANDPHALANGES1	HANDPHALANGES3
ENSMUSG00000026249	8123.42	-0.600361	0.0765412	-7.84364	4.37687e-15	6.07712e-13	Serpine2	HANDPHALANGES1	HANDPHALANGES3
ENSMUSG00000059291	2888.92	-1.22792	0.157213	-7.81054	5.69451e-15	7.8517e-13	Rpl11	HANDPHALANGES1	HANDPHALANGES3
ENSMUSG00000061983	1726.52	-1.67912	0.215072	-7.80724	5.84547e-15	8.00426e-13	Rps12	HANDPHALANGES1	HANDPHALANGES3
ENSMUSG00000066829	544.974	0.981155	0.125714	7.80467	5.96593e-15	8.11325e-13	Zfp810	HANDPHALANGES1	HANDPHALANGES3
ENSMUSG00000001870	5653.39	0.813774	0.104351	7.79846	6.26691e-15	8.4646e-13	Ltbp1	HANDPHALANGES1	HANDPHALANGES3
ENSMUSG00000051367	1260.08	1.37643	0.176679	7.79055	6.67155e-15	8.95025e-13	Six1	HANDPHALANGES1	HANDPHALANGES3
ENSMUSG00000040569	774.607	1.84055	0.236417	7.7852	6.96009e-15	9.27467e-13	Slc26a7	HANDPHALANGES1	HANDPHALANGES3
ENSMUSG00000035258	197.797	2.19587	0.282654	7.76874	7.92738e-15	1.04932e-12	Abi3bp	HANDPHALANGES1	HANDPHALANGES3
ENSMUSG00000039007	1650.31	-0.873076	0.112396	-7.76787	7.98169e-15	1.04951e-12	Cpq	HANDPHALANGES1	HANDPHALANGES3
ENSMUSG00000053819	1635.15	1.04644	0.134757	7.76533	8.14314e-15	1.0637e-12	Camk2d	HANDPHALANGES1	HANDPHALANGES3
ENSMUSG00000027217	2302.93	1.00558	0.129655	7.7558	8.77862e-15	1.13921e-12	Tspan18	HANDPHALANGES1	HANDPHALANGES3
ENSMUSG00000045128	13299.2	-1.08489	0.140063	-7.74571	9.50488e-15	1.22545e-12	Rpl18a	HANDPHALANGES1	HANDPHALANGES3
ENSMUSG00000031502	4706.63	0.763772	0.0986351	7.74341	9.6784e-15	1.23977e-12	Col4a1	HANDPHALANGES1	HANDPHALANGES3
ENSMUSG00000008683	2337.79	-1.40519	0.181513	-7.74155	9.82108e-15	1.24998e-12	Rps15a	HANDPHALANGES1	HANDPHALANGES3
ENSMUSG00000116656	245.288	-1.337	0.172893	-7.73308	1.04976e-14	1.32758e-12	Gm49708	HANDPHALANGES1	HANDPHALANGES3
ENSMUSG00000057278	1948.87	-1.204	0.155912	-7.72231	1.1424e-14	1.43559e-12	Snrpg	HANDPHALANGES1	HANDPHALANGES3
ENSMUSG00000036781	2037.8	-1.27355	0.164961	-7.72031	1.16052e-14	1.44918e-12	Rps27l	HANDPHALANGES1	HANDPHALANGES3
ENSMUSG00000001300	2637.52	1.13273	0.146787	7.71684	1.19248e-14	1.47979e-12	Efnb2	HANDPHALANGES1	HANDPHALANGES3
ENSMUSG00000031727	145.146	-3.16485	0.410302	-7.71346	1.22453e-14	1.49967e-12	Pmfbp1	HANDPHALANGES1	HANDPHALANGES3
ENSMUSG00000046364	2408.22	-1.44485	0.187333	-7.71277	1.23116e-14	1.49967e-12	Rpl27a	HANDPHALANGES1	HANDPHALANGES3
ENSMUSG00000079435	1378.68	-1.38592	0.179675	-7.71349	1.22428e-14	1.49967e-12	Rpl36a	HANDPHALANGES1	HANDPHALANGES3
ENSMUSG00000068396	1227.78	-1.33906	0.173872	-7.70145	1.3453e-14	1.62872e-12	Rpl34-ps1	HANDPHALANGES1	HANDPHALANGES3
ENSMUSG00000031059	2024.06	-1.24896	0.162725	-7.67527	1.65069e-14	1.98633e-12	Ndufb11	HANDPHALANGES1	HANDPHALANGES3
ENSMUSG00000039952	2508.92	0.702397	0.0915782	7.66991	1.72112e-14	2.05861e-12	Dag1	HANDPHALANGES1	HANDPHALANGES3
ENSMUSG00000041959	2389.52	-1.1099	0.144763	-7.66699	1.76074e-14	2.09339e-12	S100a10	HANDPHALANGES1	HANDPHALANGES3
ENSMUSG00000060938	3397.36	-1.28503	0.167752	-7.66034	1.85444e-14	2.19166e-12	Rpl26	HANDPHALANGES1	HANDPHALANGES3
ENSMUSG00000113061	934.031	-1.37897	0.181184	-7.61092	2.7216e-14	3.19747e-12	Rps18-ps5	HANDPHALANGES1	HANDPHALANGES3
ENSMUSG00000017778	2968.08	-1.36081	0.179074	-7.59917	2.9803e-14	3.48081e-12	Cox7c	HANDPHALANGES1	HANDPHALANGES3
ENSMUSG00000073702	2325.54	-1.35296	0.178092	-7.59698	3.03113e-14	3.51948e-12	Rpl31	HANDPHALANGES1	HANDPHALANGES3
ENSMUSG00000009614	553.718	1.26637	0.166764	7.59378	3.10711e-14	3.58673e-12	Sardh	HANDPHALANGES1	HANDPHALANGES3
ENSMUSG00000028080	191.876	1.49115	0.196408	7.59209	3.14787e-14	3.61277e-12	Lrba	HANDPHALANGES1	HANDPHALANGES3
ENSMUSG00000028989	30.4555	4.33435	0.572175	7.57522	3.58533e-14	4.09119e-12	Angptl7	HANDPHALANGES1	HANDPHALANGES3
ENSMUSG00000004415	4000.15	-0.810835	0.107104	-7.57056	3.71625e-14	4.21635e-12	Col26a1	HANDPHALANGES1	HANDPHALANGES3
ENSMUSG00000020460	5095.27	-1.28281	0.169663	-7.5609	4.00286e-14	4.47892e-12	Rps27a	HANDPHALANGES1	HANDPHALANGES3
ENSMUSG00000035885	2138.11	-1.1114	0.146993	-7.56095	4.00148e-14	4.47892e-12	Cox8a	HANDPHALANGES1	HANDPHALANGES3
ENSMUSG00000076437	1304.7	-0.929404	0.122929	-7.5605	4.01535e-14	4.47892e-12	Selenoh	HANDPHALANGES1	HANDPHALANGES3
ENSMUSG00000027349	176.05	-1.4345	0.189795	-7.55814	4.08874e-14	4.53531e-12	Fam98b	HANDPHALANGES1	HANDPHALANGES3
ENSMUSG00000041453	3764.11	-1.15304	0.15269	-7.55148	4.30346e-14	4.74695e-12	Rpl21	HANDPHALANGES1	HANDPHALANGES3
ENSMUSG00000030647	1635.41	-1.15835	0.153472	-7.54765	4.43185e-14	4.86157e-12	Ndufc2	HANDPHALANGES1	HANDPHALANGES3
ENSMUSG00000024277	1450.33	0.704252	0.0933306	7.54578	4.49592e-14	4.90476e-12	Mapre2	HANDPHALANGES1	HANDPHALANGES3
ENSMUSG00000025780	476.032	1.42264	0.188718	7.53845	4.7559e-14	5.16002e-12	Itih5	HANDPHALANGES1	HANDPHALANGES3
ENSMUSG00000030170	1202.63	-0.781175	0.103675	-7.53481	4.89029e-14	5.277e-12	Wnt5b	HANDPHALANGES1	HANDPHALANGES3
ENSMUSG00000038900	2328.83	-1.29561	0.172357	-7.51703	5.60329e-14	6.01369e-12	Rpl12	HANDPHALANGES1	HANDPHALANGES3
ENSMUSG00000027204	2236.69	0.849396	0.11302	7.51544	5.67192e-14	6.05462e-12	Fbn1	HANDPHALANGES1	HANDPHALANGES3
ENSMUSG00000000740	16040.3	-1.12145	0.149259	-7.5135	5.75679e-14	6.11235e-12	Rpl13	HANDPHALANGES1	HANDPHALANGES3
ENSMUSG00000019738	582.526	-1.1564	0.154188	-7.49991	6.38623e-14	6.7446e-12	Polr2i	HANDPHALANGES1	HANDPHALANGES3
ENSMUSG00000063787	1014.32	-1.18696	0.158416	-7.49269	6.74743e-14	7.08837e-12	Chchd1	HANDPHALANGES1	HANDPHALANGES3
ENSMUSG00000052146	2608.27	-1.35084	0.180359	-7.48975	6.90067e-14	7.2112e-12	Rps10	HANDPHALANGES1	HANDPHALANGES3
ENSMUSG00000036199	1933.95	-1.27875	0.170772	-7.48802	6.99187e-14	7.26825e-12	Ndufa13	HANDPHALANGES1	HANDPHALANGES3
ENSMUSG00000048087	1495.19	0.922325	0.123211	7.48572	7.11539e-14	7.35813e-12	Ahcyl	HANDPHALANGES1	HANDPHALANGES3
ENSMUSG00000031503	2890.5	0.973644	0.13017	7.47977	7.44529e-14	7.65939e-12	Col4a2	HANDPHALANGES1	HANDPHALANGES3
ENSMUSG00000003279	675.914	-1.63427	0.218844	-7.46775	8.15782e-14	8.34915e-12	Dlgap1	HANDPHALANGES1	HANDPHALANGES3
ENSMUSG00000028407	398.578	-1.46337	0.196149	-7.46051	8.61911e-14	8.77602e-12	Smim27	HANDPHALANGES1	HANDPHALANGES3
ENSMUSG00000006360	597.063	-1.83543	0.246095	-7.45822	8.7696e-14	8.88369e-12	Crip1	HANDPHALANGES1	HANDPHALANGES3
ENSMUSG00000005958	2784.95	0.716789	0.0961214	7.45712	8.84326e-14	8.91284e-12	Ephb3	HANDPHALANGES1	HANDPHALANGES3
ENSMUSG00000085702	167.878	-1.67436	0.224566	-7.45596	8.92155e-14	8.94633e-12	Mecomos	HANDPHALANGES1	HANDPHALANGES3
ENSMUSG00000041559	3037.76	0.944281	0.12666	7.45525	8.96988e-14	8.9496e-12	Fmod	HANDPHALANGES1	HANDPHALANGES3
ENSMUSG00000021732	555.864	1.20156	0.161239	7.45205	9.18994e-14	9.12331e-12	Fgf10	HANDPHALANGES1	HANDPHALANGES3
ENSMUSG00000027962	4205.38	0.906602	0.122054	7.42787	1.10356e-13	1.08472e-11	Vcam1	HANDPHALANGES1	HANDPHALANGES3
ENSMUSG00000029211	274.302	2.27469	0.306211	7.42851	1.09831e-13	1.08472e-11	Gabra4	HANDPHALANGES1	HANDPHALANGES3
ENSMUSG00000000031	32601.6	-1.03504	0.139434	-7.42315	1.14369e-13	1.11862e-11	H19	HANDPHALANGES1	HANDPHALANGES3
ENSMUSG00000013629	783.308	1.03599	0.139805	7.41029	1.26021e-13	1.22654e-11	Cad	HANDPHALANGES1	HANDPHALANGES3
ENSMUSG00000038274	2348.36	-1.34492	0.181553	-7.40788	1.28337e-13	1.24299e-11	Fau	HANDPHALANGES1	HANDPHALANGES3
ENSMUSG00000071415	3762.71	-1.30741	0.176796	-7.395	1.41411e-13	1.36297e-11	Rpl23	HANDPHALANGES1	HANDPHALANGES3
ENSMUSG00000042745	3043.64	-1.0355	0.14007	-7.39271	1.43864e-13	1.37328e-11	Id1	HANDPHALANGES1	HANDPHALANGES3
ENSMUSG00000063142	564.655	1.3256	0.179301	7.39318	1.43356e-13	1.37328e-11	Kcnma1	HANDPHALANGES1	HANDPHALANGES3
ENSMUSG00000046402	900.835	-1.09018	0.147484	-7.39189	1.44753e-13	1.37515e-11	Rbp1	HANDPHALANGES1	HANDPHALANGES3
ENSMUSG00000066315	828.113	-1.25228	0.169777	-7.37602	1.63092e-13	1.542e-11	Gm12918	HANDPHALANGES1	HANDPHALANGES3
ENSMUSG00000063882	2000.59	-1.13144	0.153512	-7.37036	1.70165e-13	1.60125e-11	Uqcrh	HANDPHALANGES1	HANDPHALANGES3
ENSMUSG00000059534	1554.92	-1.2072	0.163849	-7.36775	1.73536e-13	1.62526e-11	Uqcr10	HANDPHALANGES1	HANDPHALANGES3
ENSMUSG00000022206	980.65	-1.16119	0.157927	-7.35273	1.94199e-13	1.80178e-11	Npr3	HANDPHALANGES1	HANDPHALANGES3
ENSMUSG00000033316	1258.6	1.43159	0.194688	7.35327	1.93418e-13	1.80178e-11	Galnt9	HANDPHALANGES1	HANDPHALANGES3
ENSMUSG00000069117	2201.83	-1.19804	0.163009	-7.34955	1.98875e-13	1.83658e-11	Rps18-ps6	HANDPHALANGES1	HANDPHALANGES3
ENSMUSG00000048216	91.4208	3.38295	0.46058	7.34499	2.05778e-13	1.89154e-11	Gpr85	HANDPHALANGES1	HANDPHALANGES3
ENSMUSG00000034460	476.047	1.43016	0.195254	7.3246	2.39612e-13	2.1924e-11	Six4	HANDPHALANGES1	HANDPHALANGES3
ENSMUSG00000027996	4130.81	1.03725	0.141636	7.32335	2.41848e-13	2.19265e-11	Sfrp2	HANDPHALANGES1	HANDPHALANGES3
ENSMUSG00000047675	4305.68	-1.1548	0.157683	-7.32354	2.41509e-13	2.19265e-11	Rps8	HANDPHALANGES1	HANDPHALANGES3
ENSMUSG00000040164	1193.6	-1.02117	0.139519	-7.31921	2.49431e-13	2.25111e-11	Kcns1	HANDPHALANGES1	HANDPHALANGES3
ENSMUSG00000024608	7585.2	-1.28595	0.175757	-7.31661	2.54308e-13	2.28474e-11	Rps14	HANDPHALANGES1	HANDPHALANGES3
ENSMUSG00000008668	4032.73	-1.16359	0.159141	-7.31168	2.63822e-13	2.34896e-11	Rps18	HANDPHALANGES1	HANDPHALANGES3
ENSMUSG00000078974	2174.04	-1.21084	0.165596	-7.31199	2.63218e-13	2.34896e-11	Sec61g	HANDPHALANGES1	HANDPHALANGES3
ENSMUSG00000072772	2768.06	-1.06628	0.145853	-7.31067	2.65809e-13	2.35609e-11	Grcc10	HANDPHALANGES1	HANDPHALANGES3
ENSMUSG00000047721	416.29	-1.26148	0.172593	-7.30899	2.69153e-13	2.37513e-11	Bola2	HANDPHALANGES1	HANDPHALANGES3
ENSMUSG00000097346	2644.63	-1.2247	0.167586	-7.30793	2.7128e-13	2.3833e-11	Rps18-ps4	HANDPHALANGES1	HANDPHALANGES3
ENSMUSG00000039081	285.509	-1.41801	0.194239	-7.30036	2.86996e-13	2.51027e-11	Zfp503	HANDPHALANGES1	HANDPHALANGES3
ENSMUSG00000040640	507.625	1.14136	0.156376	7.29885	2.90248e-13	2.52758e-11	Erc2	HANDPHALANGES1	HANDPHALANGES3
ENSMUSG00000047215	5241.77	-1.06772	0.146345	-7.29594	2.96583e-13	2.57146e-11	Rpl9	HANDPHALANGES1	HANDPHALANGES3
ENSMUSG00000079283	319.196	-1.24737	0.171902	-7.25624	3.98005e-13	3.43582e-11	2310009B15Rik	HANDPHALANGES1	HANDPHALANGES3
ENSMUSG00000021643	1022.67	-1.23394	0.170078	-7.25517	4.01152e-13	3.44799e-11	Serf1	HANDPHALANGES1	HANDPHALANGES3
ENSMUSG00000022053	404.977	1.27822	0.176284	7.25092	4.13964e-13	3.54278e-11	Ebf2	HANDPHALANGES1	HANDPHALANGES3
ENSMUSG00000028081	9760.16	-1.03725	0.143194	-7.24369	4.3665e-13	3.72089e-11	Rps3a1	HANDPHALANGES1	HANDPHALANGES3
ENSMUSG00000057123	258.431	1.94378	0.268453	7.24067	4.46464e-13	3.78827e-11	Gja5	HANDPHALANGES1	HANDPHALANGES3
ENSMUSG00000021944	40.1128	-6.7114	0.927145	-7.23878	4.52735e-13	3.82513e-11	Gata4	HANDPHALANGES1	HANDPHALANGES3
ENSMUSG00000037805	3616.9	-1.07147	0.148095	-7.23501	4.65492e-13	3.90461e-11	Rpl10a	HANDPHALANGES1	HANDPHALANGES3
ENSMUSG00000043099	295.397	1.4432	0.199479	7.23484	4.66076e-13	3.90461e-11	Hic1	HANDPHALANGES1	HANDPHALANGES3
ENSMUSG00000032036	593.798	1.07255	0.148299	7.23236	4.74669e-13	3.95989e-11	Kirrel3	HANDPHALANGES1	HANDPHALANGES3
ENSMUSG00000072692	215.227	-1.59477	0.220644	-7.22778	4.90953e-13	4.07861e-11	Rpl37rt	HANDPHALANGES1	HANDPHALANGES3
ENSMUSG00000031453	787.508	1.43135	0.198093	7.22563	4.98791e-13	4.10947e-11	Rasa3	HANDPHALANGES1	HANDPHALANGES3
ENSMUSG00000055839	3053.18	-1.25306	0.173419	-7.22562	4.98807e-13	4.10947e-11	Elob	HANDPHALANGES1	HANDPHALANGES3
ENSMUSG00000039385	524.122	1.16758	0.161739	7.21889	5.24152e-13	4.30043e-11	Cdh6	HANDPHALANGES1	HANDPHALANGES3
ENSMUSG00000026154	704.633	-1.13599	0.157567	-7.2096	5.61157e-13	4.58509e-11	Sdhaf4	HANDPHALANGES1	HANDPHALANGES3
ENSMUSG00000028532	1472.45	0.853603	0.118455	7.20615	5.75556e-13	4.68347e-11	Cachd1	HANDPHALANGES1	HANDPHALANGES3
ENSMUSG00000051627	124.961	-1.629	0.22623	-7.20061	5.99443e-13	4.85793e-11	H1f4	HANDPHALANGES1	HANDPHALANGES3
ENSMUSG00000012848	6260.5	-1.07141	0.148807	-7.20003	6.0199e-13	4.85874e-11	Rps5	HANDPHALANGES1	HANDPHALANGES3
ENSMUSG00000034648	1715.07	1.28886	0.179026	7.19927	6.05366e-13	4.86621e-11	Lrrn1	HANDPHALANGES1	HANDPHALANGES3
ENSMUSG00000024134	1174.91	-0.86656	0.120459	-7.19382	6.30016e-13	5.04394e-11	Six2	HANDPHALANGES1	HANDPHALANGES3
ENSMUSG00000039001	752.184	-1.65162	0.229748	-7.18884	6.53422e-13	5.18692e-11	Rps21	HANDPHALANGES1	HANDPHALANGES3
ENSMUSG00000044894	1319.48	-1.23129	0.17129	-7.18837	6.55713e-13	5.18692e-11	Uqcrq	HANDPHALANGES1	HANDPHALANGES3
ENSMUSG00000047330	1106.85	1.31462	0.182861	7.18917	6.51866e-13	5.18692e-11	Kcne4	HANDPHALANGES1	HANDPHALANGES3
ENSMUSG00000032766	699.463	-1.31542	0.183101	-7.1841	6.7651e-13	5.30913e-11	Gng11	HANDPHALANGES1	HANDPHALANGES3
ENSMUSG00000038717	1839.48	-1.14868	0.159884	-7.18442	6.74933e-13	5.30913e-11	Atp5mg	HANDPHALANGES1	HANDPHALANGES3
ENSMUSG00000071379	477.798	-1.13092	0.158002	-7.15765	8.20726e-13	6.41556e-11	Hpcal1	HANDPHALANGES1	HANDPHALANGES3
ENSMUSG00000001105	1291.82	-0.795923	0.11126	-7.15371	8.4466e-13	6.54239e-11	Ift20	HANDPHALANGES1	HANDPHALANGES3
ENSMUSG00000050447	456.748	1.12739	0.157602	7.1534	8.4654e-13	6.54239e-11	Lypd6	HANDPHALANGES1	HANDPHALANGES3
ENSMUSG00000053141	141.674	-2.63454	0.368322	-7.15282	8.50132e-13	6.54239e-11	Ptprt	HANDPHALANGES1	HANDPHALANGES3
ENSMUSG00000006333	6634.18	-1.19157	0.166741	-7.14624	8.91895e-13	6.83729e-11	Rps9	HANDPHALANGES1	HANDPHALANGES3
ENSMUSG00000113902	857.908	-1.3812	0.193344	-7.14374	9.08242e-13	6.93583e-11	Ndufb1	HANDPHALANGES1	HANDPHALANGES3
ENSMUSG00000032330	2035.79	-1.16538	0.163195	-7.14105	9.26186e-13	7.04576e-11	Cox7a2	HANDPHALANGES1	HANDPHALANGES3
ENSMUSG00000021520	2905.62	-0.979571	0.137352	-7.13182	9.90517e-13	7.50638e-11	Uqcrb	HANDPHALANGES1	HANDPHALANGES3
ENSMUSG00000021994	9212.11	0.726703	0.101909	7.13093	9.96957e-13	7.52646e-11	Wnt5a	HANDPHALANGES1	HANDPHALANGES3
ENSMUSG00000071528	1753.61	-1.20716	0.169451	-7.12392	1.04902e-12	7.88954e-11	Atp5mk	HANDPHALANGES1	HANDPHALANGES3
ENSMUSG00000031827	415.38	-1.46928	0.206357	-7.12011	1.07839e-12	8.07977e-11	Cotl1	HANDPHALANGES1	HANDPHALANGES3
ENSMUSG00000022010	22418.5	-0.797003	0.111995	-7.1164	1.10779e-12	8.26888e-11	Tsc22d1	HANDPHALANGES1	HANDPHALANGES3
ENSMUSG00000083833	793.74	-1.26169	0.177467	-7.10943	1.16523e-12	8.66501e-11	Gm13841	HANDPHALANGES1	HANDPHALANGES3
ENSMUSG00000054312	805.916	-1.22691	0.172664	-7.10575	1.19672e-12	8.86598e-11	Mrps21	HANDPHALANGES1	HANDPHALANGES3
ENSMUSG00000063021	169.488	-1.91353	0.26943	-7.10214	1.22844e-12	9.06714e-11	H2ac15	HANDPHALANGES1	HANDPHALANGES3
ENSMUSG00000001289	1310.04	-1.1274	0.158772	-7.10076	1.24075e-12	9.12411e-11	Pfdn5	HANDPHALANGES1	HANDPHALANGES3
ENSMUSG00000025290	3508.42	-1.0501	0.148058	-7.09251	1.317e-12	9.64715e-11	Rps24	HANDPHALANGES1	HANDPHALANGES3
ENSMUSG00000026385	2669.14	-1.0434	0.147123	-7.09203	1.32159e-12	9.64715e-11	Dbi	HANDPHALANGES1	HANDPHALANGES3
ENSMUSG00000022450	1137.15	-1.19004	0.167864	-7.08931	1.34783e-12	9.80264e-11	Ndufa6	HANDPHALANGES1	HANDPHALANGES3
ENSMUSG00000020140	503.578	1.39815	0.19725	7.08821	1.35853e-12	9.84437e-11	Lgr5	HANDPHALANGES1	HANDPHALANGES3
ENSMUSG00000029632	2526.91	-0.983027	0.138716	-7.08662	1.37427e-12	9.89194e-11	Ndufa4	HANDPHALANGES1	HANDPHALANGES3
ENSMUSG00000030432	1966.39	-1.35025	0.190538	-7.08654	1.37506e-12	9.89194e-11	Rpl28	HANDPHALANGES1	HANDPHALANGES3
ENSMUSG00000032383	7670.38	-0.936652	0.132254	-7.08222	1.41868e-12	1.01689e-10	Ppib	HANDPHALANGES1	HANDPHALANGES3
ENSMUSG00000054428	3524.57	-1.08159	0.152768	-7.07991	1.44246e-12	1.03022e-10	Atp5if1	HANDPHALANGES1	HANDPHALANGES3
ENSMUSG00000022231	1130.36	0.929292	0.131448	7.06965	1.55326e-12	1.10538e-10	Sema5a	HANDPHALANGES1	HANDPHALANGES3
ENSMUSG00000060126	6089.53	-1.26265	0.178829	-7.06068	1.65684e-12	1.17488e-10	Tpt1	HANDPHALANGES1	HANDPHALANGES3
ENSMUSG00000019737	923.877	1.11878	0.15848	7.05946	1.67149e-12	1.18105e-10	Syne4	HANDPHALANGES1	HANDPHALANGES3
ENSMUSG00000102869	8979.05	0.705031	0.0999067	7.0569	1.70261e-12	1.19877e-10	Norad	HANDPHALANGES1	HANDPHALANGES3
ENSMUSG00000016252	1439.93	-1.4156	0.200674	-7.05422	1.73568e-12	1.21774e-10	Atp5f1e	HANDPHALANGES1	HANDPHALANGES3
ENSMUSG00000059070	5342.22	-1.16441	0.165266	-7.04566	1.84588e-12	1.28596e-10	Rpl18	HANDPHALANGES1	HANDPHALANGES3
ENSMUSG00000079523	3547.95	-1.403	0.199119	-7.04603	1.84099e-12	1.28596e-10	Tmsb10	HANDPHALANGES1	HANDPHALANGES3
ENSMUSG00000022205	5988.36	-0.915505	0.130237	-7.02955	2.07203e-12	1.43847e-10	Sub1	HANDPHALANGES1	HANDPHALANGES3
ENSMUSG00000063594	209.394	-1.53036	0.217868	-7.02427	2.15181e-12	1.48865e-10	Gng8	HANDPHALANGES1	HANDPHALANGES3
ENSMUSG00000069272	270.831	-1.84083	0.26215	-7.02205	2.18641e-12	1.50733e-10	H2ac8	HANDPHALANGES1	HANDPHALANGES3
ENSMUSG00000049354	2054.9	0.675779	0.0964673	7.00526	2.46523e-12	1.69367e-10	Dcaf7	HANDPHALANGES1	HANDPHALANGES3
ENSMUSG00000033020	1045.51	-1.07636	0.153747	-7.00087	2.54387e-12	1.74167e-10	Polr2f	HANDPHALANGES1	HANDPHALANGES3
ENSMUSG00000021040	1649.21	-0.820942	0.117416	-6.99174	2.71498e-12	1.85244e-10	Slirp	HANDPHALANGES1	HANDPHALANGES3
ENSMUSG00000022454	672.218	1.21107	0.173284	6.98893	2.76985e-12	1.88341e-10	Nell2	HANDPHALANGES1	HANDPHALANGES3
ENSMUSG00000068523	2785.73	-0.854347	0.122284	-6.98661	2.81611e-12	1.90832e-10	Gng5	HANDPHALANGES1	HANDPHALANGES3
ENSMUSG00000030744	8580.31	-0.926538	0.132806	-6.97664	3.02322e-12	2.0417e-10	Rps3	HANDPHALANGES1	HANDPHALANGES3
ENSMUSG00000095597	1033.25	-1.24632	0.179023	-6.96181	3.35924e-12	2.26094e-10	Rps7-ps3	HANDPHALANGES1	HANDPHALANGES3
ENSMUSG00000039452	2642.37	-1.13583	0.16339	-6.95163	3.61097e-12	2.41504e-10	Snx22	HANDPHALANGES1	HANDPHALANGES3
ENSMUSG00000047045	1928.18	0.912425	0.131255	6.95157	3.61253e-12	2.41504e-10	Tmem164	HANDPHALANGES1	HANDPHALANGES3
ENSMUSG00000017737	373.495	1.19965	0.172592	6.95081	3.63205e-12	2.41912e-10	Mmp9	HANDPHALANGES1	HANDPHALANGES3
ENSMUSG00000031231	1932.75	-1.0122	0.145632	-6.95038	3.643e-12	2.41912e-10	Cox7b	HANDPHALANGES1	HANDPHALANGES3
ENSMUSG00000071653	820.352	-0.952407	0.137051	-6.94931	3.67077e-12	2.42944e-10	1810009A15Rik	HANDPHALANGES1	HANDPHALANGES3
ENSMUSG00000043633	4761.92	-1.09747	0.158165	-6.93872	3.95665e-12	2.60994e-10	Fam221b	HANDPHALANGES1	HANDPHALANGES3
ENSMUSG00000034566	3906.19	-1.05482	0.152132	-6.9336	4.10268e-12	2.69731e-10	Atp5pd	HANDPHALANGES1	HANDPHALANGES3
ENSMUSG00000002379	2329.83	-1.11156	0.160356	-6.93181	4.15484e-12	2.71363e-10	Ndufa11	HANDPHALANGES1	HANDPHALANGES3
ENSMUSG00000119584	360.808	-2.17354	0.313556	-6.93193	4.1515e-12	2.71363e-10	Rn18s-rs5	HANDPHALANGES1	HANDPHALANGES3
ENSMUSG00000029838	6237.32	-0.792631	0.1144	-6.92861	4.24987e-12	2.76659e-10	Ptn	HANDPHALANGES1	HANDPHALANGES3
ENSMUSG00000063316	3444.77	-1.2149	0.175372	-6.92759	4.28085e-12	2.77765e-10	Rpl27	HANDPHALANGES1	HANDPHALANGES3
ENSMUSG00000025508	1869.5	-1.41057	0.203827	-6.92042	4.50307e-12	2.91233e-10	Rplp2	HANDPHALANGES1	HANDPHALANGES3
ENSMUSG00000039016	1012.5	-1.19888	0.173256	-6.91967	4.52691e-12	2.91824e-10	Timm8b	HANDPHALANGES1	HANDPHALANGES3
ENSMUSG00000007892	2382.27	-1.3277	0.191923	-6.91791	4.5835e-12	2.93566e-10	Rplp1	HANDPHALANGES1	HANDPHALANGES3
ENSMUSG00000040249	4073.75	0.742916	0.107383	6.91836	4.56887e-12	2.93566e-10	Lrp1	HANDPHALANGES1	HANDPHALANGES3
ENSMUSG00000081344	85.6033	-1.83053	0.264976	-6.9083	4.9048e-12	3.13134e-10	Gm14303	HANDPHALANGES1	HANDPHALANGES3
ENSMUSG00000022661	1013.71	0.897036	0.1299	6.9056	4.9992e-12	3.18138e-10	Cd200	HANDPHALANGES1	HANDPHALANGES3
ENSMUSG00000046229	374.68	-1.44639	0.209467	-6.90508	5.01734e-12	3.18273e-10	Scand1	HANDPHALANGES1	HANDPHALANGES3
ENSMUSG00000051118	478.23	-1.69385	0.245454	-6.90088	5.16801e-12	3.26786e-10	Or7d10	HANDPHALANGES1	HANDPHALANGES3
ENSMUSG00000024245	189.678	1.47474	0.214072	6.88901	5.61813e-12	3.54121e-10	Tmem178	HANDPHALANGES1	HANDPHALANGES3
ENSMUSG00000003429	5872.95	-1.07584	0.156199	-6.88763	5.67293e-12	3.56443e-10	Rps11	HANDPHALANGES1	HANDPHALANGES3
ENSMUSG00000023046	78.5262	2.76342	0.401427	6.88398	5.82021e-12	3.64544e-10	Igfbp6	HANDPHALANGES1	HANDPHALANGES3
ENSMUSG00000091803	644.431	-0.958179	0.139209	-6.88302	5.85988e-12	3.65874e-10	Cox16	HANDPHALANGES1	HANDPHALANGES3
ENSMUSG00000023951	1604.9	0.659518	0.0958457	6.88104	5.94181e-12	3.6867e-10	Vegfa	HANDPHALANGES1	HANDPHALANGES3
ENSMUSG00000050621	199.273	-1.77275	0.257628	-6.88105	5.94121e-12	3.6867e-10	Rps27rt	HANDPHALANGES1	HANDPHALANGES3
ENSMUSG00000032220	1245.12	0.774962	0.112644	6.87976	5.99517e-12	3.69712e-10	Myo1e	HANDPHALANGES1	HANDPHALANGES3
ENSMUSG00000048583	16336.4	-0.718032	0.104369	-6.87975	5.99583e-12	3.69712e-10	Igf2	HANDPHALANGES1	HANDPHALANGES3
ENSMUSG00000116132	108.757	-4.21089	0.612187	-6.87844	6.05135e-12	3.7198e-10	Gm49428	HANDPHALANGES1	HANDPHALANGES3
ENSMUSG00000027276	574.891	1.14427	0.166402	6.87657	6.13092e-12	3.75708e-10	Jag1	HANDPHALANGES1	HANDPHALANGES3
ENSMUSG00000060636	1489.65	-1.21799	0.17714	-6.87586	6.16172e-12	3.76434e-10	Rpl35a	HANDPHALANGES1	HANDPHALANGES3
ENSMUSG00000049751	1832.64	-1.07289	0.156256	-6.86624	6.59182e-12	3.97814e-10	Rpl36al	HANDPHALANGES1	HANDPHALANGES3
ENSMUSG00000058600	1784.67	-1.02099	0.148692	-6.86648	6.58033e-12	3.97814e-10	Rpl30	HANDPHALANGES1	HANDPHALANGES3
ENSMUSG00000062328	2568.46	-1.20798	0.175923	-6.86653	6.57845e-12	3.97814e-10	Rpl17	HANDPHALANGES1	HANDPHALANGES3
ENSMUSG00000071866	34791	-0.886441	0.129088	-6.86697	6.55782e-12	3.97814e-10	Ppia	HANDPHALANGES1	HANDPHALANGES3
ENSMUSG00000099521	38.0584	4.99259	0.727377	6.86383	6.70364e-12	4.03336e-10	Gm28309	HANDPHALANGES1	HANDPHALANGES3
ENSMUSG00000027208	300.455	1.62786	0.237239	6.86168	6.80563e-12	4.07005e-10	Fgf7	HANDPHALANGES1	HANDPHALANGES3
ENSMUSG00000037851	2196.64	0.616151	0.0897938	6.86184	6.79794e-12	4.07005e-10	Iars1	HANDPHALANGES1	HANDPHALANGES3
ENSMUSG00000090862	2774.62	-1.08982	0.158845	-6.86089	6.84336e-12	4.08033e-10	Rps13	HANDPHALANGES1	HANDPHALANGES3
ENSMUSG00000036570	568.345	-1.24049	0.181001	-6.8535	7.20629e-12	4.28386e-10	Fxyd1	HANDPHALANGES1	HANDPHALANGES3
ENSMUSG00000036372	1759.61	-1.10239	0.160931	-6.85005	7.38254e-12	4.37553e-10	Tmem258	HANDPHALANGES1	HANDPHALANGES3
ENSMUSG00000020674	4743.45	0.851369	0.124321	6.84814	7.48172e-12	4.42112e-10	Pxdn	HANDPHALANGES1	HANDPHALANGES3
ENSMUSG00000039579	1230.88	1.31137	0.191613	6.84386	7.70872e-12	4.54174e-10	Grin3a	HANDPHALANGES1	HANDPHALANGES3
ENSMUSG00000008333	1099.7	-0.859722	0.125719	-6.83844	8.00621e-12	4.70306e-10	Snrpb2	HANDPHALANGES1	HANDPHALANGES3
ENSMUSG00000010277	2038.24	0.604717	0.0884358	6.83792	8.03522e-12	4.70617e-10	Bltp2	HANDPHALANGES1	HANDPHALANGES3
ENSMUSG00000019370	1532.52	-0.939135	0.137395	-6.83529	8.18402e-12	4.77923e-10	Calm3	HANDPHALANGES1	HANDPHALANGES3
ENSMUSG00000031320	6371.62	-1.01041	0.147878	-6.83274	8.33104e-12	4.85081e-10	Rps4x	HANDPHALANGES1	HANDPHALANGES3
ENSMUSG00000029236	65.6538	2.38023	0.348571	6.82854	8.57822e-12	4.98013e-10	Nmu	HANDPHALANGES1	HANDPHALANGES3
ENSMUSG00000074743	452.876	1.38709	0.203163	6.82746	8.64319e-12	5.00322e-10	Thbd	HANDPHALANGES1	HANDPHALANGES3
ENSMUSG00000053199	609.464	-1.28111	0.187696	-6.82548	8.76305e-12	5.05786e-10	Arhgap20	HANDPHALANGES1	HANDPHALANGES3
ENSMUSG00000120012	222.542	-1.3911	0.204143	-6.81434	9.4699e-12	5.44999e-10	Gm36220	HANDPHALANGES1	HANDPHALANGES3
ENSMUSG00000073616	1093.08	-1.17075	0.172476	-6.78793	1.1375e-11	6.52747e-10	Cops9	HANDPHALANGES1	HANDPHALANGES3
ENSMUSG00000090247	753.773	-1.13836	0.168114	-6.77135	1.27586e-11	7.30035e-10	Bloc1s1	HANDPHALANGES1	HANDPHALANGES3
ENSMUSG00000051323	234.859	1.46128	0.215915	6.76785	1.30712e-11	7.45774e-10	Pcdh19	HANDPHALANGES1	HANDPHALANGES3
ENSMUSG00000087687	343.756	-1.40025	0.206991	-6.76481	1.33482e-11	7.59392e-10	Pet100	HANDPHALANGES1	HANDPHALANGES3
ENSMUSG00000070394	1330.97	-1.26805	0.18748	-6.76366	1.34553e-11	7.63299e-10	Tmem256	HANDPHALANGES1	HANDPHALANGES3
ENSMUSG00000024990	848.17	-1.33141	0.197114	-6.75453	1.43301e-11	8.10612e-10	Rbp4	HANDPHALANGES1	HANDPHALANGES3
ENSMUSG00000040824	1511.43	-1.19575	0.177042	-6.75403	1.43795e-11	8.11095e-10	Snrpd2	HANDPHALANGES1	HANDPHALANGES3
ENSMUSG00000049760	1123.37	-1.04005	0.154005	-6.7534	1.44424e-11	8.12333e-10	Micos13	HANDPHALANGES1	HANDPHALANGES3
ENSMUSG00000028398	736.387	-0.932877	0.138169	-6.75173	1.46091e-11	8.19389e-10	Dmac1	HANDPHALANGES1	HANDPHALANGES3
ENSMUSG00000036751	2715.71	-1.0554	0.156357	-6.74996	1.47891e-11	8.27146e-10	Cox6b1	HANDPHALANGES1	HANDPHALANGES3
ENSMUSG00000043940	2337.76	0.770936	0.114313	6.7441	1.53983e-11	8.58799e-10	Wdfy3	HANDPHALANGES1	HANDPHALANGES3
ENSMUSG00000028495	9954.22	-0.957408	0.142073	-6.73882	1.59674e-11	8.88049e-10	Rps6	HANDPHALANGES1	HANDPHALANGES3
ENSMUSG00000021928	804.19	-0.910584	0.13516	-6.7371	1.61583e-11	8.93829e-10	Ebpl	HANDPHALANGES1	HANDPHALANGES3
ENSMUSG00000028597	1990.95	-0.900646	0.133693	-6.73666	1.62064e-11	8.93829e-10	Gpx7	HANDPHALANGES1	HANDPHALANGES3
ENSMUSG00000062647	3685.3	-1.07412	0.159441	-6.73678	1.6194e-11	8.93829e-10	Rpl7a	HANDPHALANGES1	HANDPHALANGES3
ENSMUSG00000097185	1307.09	-0.802933	0.119318	-6.72934	1.70432e-11	9.37378e-10	Gm26596	HANDPHALANGES1	HANDPHALANGES3
ENSMUSG00000038545	1426.33	0.902441	0.134239	6.72265	1.78448e-11	9.76059e-10	Cul7	HANDPHALANGES1	HANDPHALANGES3
ENSMUSG00000068122	3735.15	2.20083	0.32736	6.72296	1.78075e-11	9.76059e-10	Agtr2	HANDPHALANGES1	HANDPHALANGES3
ENSMUSG00000027189	2962	0.815618	0.121345	6.72151	1.79853e-11	9.81041e-10	Trim44	HANDPHALANGES1	HANDPHALANGES3
ENSMUSG00000034771	1360.64	0.732743	0.109099	6.71633	1.86361e-11	1.01375e-09	Tle2	HANDPHALANGES1	HANDPHALANGES3
ENSMUSG00000051989	583.884	-1.07849	0.160637	-6.71384	1.89562e-11	1.02835e-09	Smim11	HANDPHALANGES1	HANDPHALANGES3
ENSMUSG00000001506	17933.1	0.831667	0.123933	6.7106	1.93832e-11	1.04696e-09	Col1a1	HANDPHALANGES1	HANDPHALANGES3
ENSMUSG00000055421	3030.39	1.12296	0.167345	6.71043	1.94048e-11	1.04696e-09	Pcdh9	HANDPHALANGES1	HANDPHALANGES3
ENSMUSG00000017404	5963.59	-1.11708	0.16663	-6.70399	2.02809e-11	1.08832e-09	Rpl19	HANDPHALANGES1	HANDPHALANGES3
ENSMUSG00000030498	4377.12	1.02518	0.153041	6.69876	2.102e-11	1.12494e-09	Gas2	HANDPHALANGES1	HANDPHALANGES3
ENSMUSG00000036169	1668.44	0.700138	0.104534	6.69768	2.11752e-11	1.1302e-09	Sostdc1	HANDPHALANGES1	HANDPHALANGES3
ENSMUSG00000053626	230.112	1.63214	0.243741	6.69621	2.13898e-11	1.13859e-09	Tll1	HANDPHALANGES1	HANDPHALANGES3
ENSMUSG00000038690	2310.22	-1.09083	0.163055	-6.68994	2.23257e-11	1.18523e-09	Atp5mf	HANDPHALANGES1	HANDPHALANGES3
ENSMUSG00000028364	3127.3	0.905605	0.135382	6.68928	2.24279e-11	1.18748e-09	Tnc	HANDPHALANGES1	HANDPHALANGES3
ENSMUSG00000025776	2695.68	0.86034	0.128667	6.68656	2.28483e-11	1.20652e-09	Crispld1	HANDPHALANGES1	HANDPHALANGES3
ENSMUSG00000032348	1175.34	-0.892566	0.133512	-6.6853	2.3046e-11	1.21373e-09	Gsta4	HANDPHALANGES1	HANDPHALANGES3
ENSMUSG00000062006	1442.98	-1.1294	0.169015	-6.68227	2.35264e-11	1.23576e-09	Rpl34	HANDPHALANGES1	HANDPHALANGES3
ENSMUSG00000042043	1179.78	-1.05239	0.157565	-6.67911	2.40403e-11	1.25942e-09	Tbca	HANDPHALANGES1	HANDPHALANGES3
ENSMUSG00000014294	1840.51	-1.13226	0.169623	-6.67513	2.47017e-11	1.29066e-09	Ndufa2	HANDPHALANGES1	HANDPHALANGES3
ENSMUSG00000021253	3823.71	0.812711	0.121868	6.66878	2.57941e-11	1.34305e-09	Tgfb3	HANDPHALANGES1	HANDPHALANGES3
ENSMUSG00000057359	7614.52	-0.892869	0.133893	-6.66852	2.58396e-11	1.34305e-09	Gm17494	HANDPHALANGES1	HANDPHALANGES3
ENSMUSG00000029614	6899.75	-0.971678	0.145782	-6.66527	2.64183e-11	1.36954e-09	Rpl6	HANDPHALANGES1	HANDPHALANGES3
ENSMUSG00000012405	7520.77	-0.907409	0.136402	-6.65245	2.88247e-11	1.4904e-09	Rpl15	HANDPHALANGES1	HANDPHALANGES3
ENSMUSG00000042462	520.014	-1.11893	0.168376	-6.64541	3.02366e-11	1.55934e-09	Dctpp1	HANDPHALANGES1	HANDPHALANGES3
ENSMUSG00000029642	1155.1	-0.808487	0.121736	-6.64133	3.10868e-11	1.59904e-09	Polr1d	HANDPHALANGES1	HANDPHALANGES3
ENSMUSG00000023089	1092.17	-1.08369	0.163219	-6.63952	3.1471e-11	1.61462e-09	Ndufa5	HANDPHALANGES1	HANDPHALANGES3
ENSMUSG00000064220	84.5563	-1.86616	0.281113	-6.63849	3.16918e-11	1.62176e-09	H2ac18	HANDPHALANGES1	HANDPHALANGES3
ENSMUSG00000040412	33.2502	-4.02721	0.607023	-6.63436	3.25908e-11	1.66347e-09	Elapor1	HANDPHALANGES1	HANDPHALANGES3
ENSMUSG00000037852	19597	0.635945	0.0958971	6.63153	3.32214e-11	1.69131e-09	Cpe	HANDPHALANGES1	HANDPHALANGES3
ENSMUSG00000009013	10403.8	-0.795653	0.120091	-6.6254	3.46317e-11	1.7586e-09	Dynll1	HANDPHALANGES1	HANDPHALANGES3
ENSMUSG00000029528	1015.05	0.693701	0.104714	6.62469	3.47967e-11	1.76196e-09	Pxn	HANDPHALANGES1	HANDPHALANGES3
ENSMUSG00000055491	1116.44	0.816896	0.123317	6.62436	3.48753e-11	1.76196e-09	Pprc1	HANDPHALANGES1	HANDPHALANGES3
ENSMUSG00000028367	2708.35	-0.949532	0.143373	-6.62282	3.52421e-11	1.77597e-09	Txn1	HANDPHALANGES1	HANDPHALANGES3
ENSMUSG00000040488	1865.21	0.849458	0.128499	6.61063	3.82687e-11	1.92361e-09	Ltbp4	HANDPHALANGES1	HANDPHALANGES3
ENSMUSG00000003974	41.668	5.60748	0.850105	6.59622	4.21778e-11	2.11475e-09	Grm3	HANDPHALANGES1	HANDPHALANGES3
ENSMUSG00000019846	2360.36	0.626821	0.0950584	6.59406	4.27947e-11	2.14027e-09	Lama4	HANDPHALANGES1	HANDPHALANGES3
ENSMUSG00000027408	4727.71	0.629735	0.0955176	6.59287	4.31402e-11	2.15213e-09	Cpxm1	HANDPHALANGES1	HANDPHALANGES3
ENSMUSG00000031712	64.7475	2.05117	0.311155	6.59211	4.33611e-11	2.15773e-09	Il15	HANDPHALANGES1	HANDPHALANGES3
ENSMUSG00000049775	8680.47	-1.03167	0.156586	-6.58851	4.44272e-11	2.19975e-09	Tmsb4x	HANDPHALANGES1	HANDPHALANGES3
ENSMUSG00000060703	731.028	-0.756171	0.114771	-6.58851	4.4426e-11	2.19975e-09	Cd302	HANDPHALANGES1	HANDPHALANGES3
ENSMUSG00000071654	662.005	-0.962846	0.146158	-6.58769	4.46728e-11	2.20641e-09	Uqcc3	HANDPHALANGES1	HANDPHALANGES3
ENSMUSG00000034488	986.977	1.18972	0.180665	6.58521	4.54245e-11	2.23797e-09	Edil3	HANDPHALANGES1	HANDPHALANGES3
ENSMUSG00000026674	2779.2	0.735031	0.111637	6.58411	4.57611e-11	2.24898e-09	Ddr2	HANDPHALANGES1	HANDPHALANGES3
ENSMUSG00000095304	148.94	-2.17398	0.330244	-6.58296	4.61163e-11	2.26084e-09	Plac9	HANDPHALANGES1	HANDPHALANGES3
ENSMUSG00000016150	318.428	2.04268	0.310765	6.57307	4.92899e-11	2.41047e-09	Tenm1	HANDPHALANGES1	HANDPHALANGES3
ENSMUSG00000024620	2977.14	0.917909	0.139741	6.56866	5.07685e-11	2.47061e-09	Pdgfrb	HANDPHALANGES1	HANDPHALANGES3
ENSMUSG00000043716	9543.44	-0.895905	0.136385	-6.56896	5.06688e-11	2.47061e-09	Rpl7	HANDPHALANGES1	HANDPHALANGES3
ENSMUSG00000033910	613.048	1.34347	0.2047	6.56312	5.26922e-11	2.55795e-09	Gucy1a1	HANDPHALANGES1	HANDPHALANGES3
ENSMUSG00000015312	766.257	-1.16946	0.178214	-6.56212	5.30479e-11	2.56269e-09	Gadd45b	HANDPHALANGES1	HANDPHALANGES3
ENSMUSG00000025794	5760.89	-0.976448	0.148795	-6.56236	5.29636e-11	2.56269e-09	Rpl14	HANDPHALANGES1	HANDPHALANGES3
ENSMUSG00000020477	826.895	-1.06402	0.162174	-6.56094	5.34691e-11	2.57677e-09	Mrps24	HANDPHALANGES1	HANDPHALANGES3
ENSMUSG00000041571	2228.05	-0.967602	0.14763	-6.55424	5.59269e-11	2.68869e-09	Selenow	HANDPHALANGES1	HANDPHALANGES3
ENSMUSG00000063632	2139.41	-0.816309	0.124583	-6.55235	5.66381e-11	2.7163e-09	Sox11	HANDPHALANGES1	HANDPHALANGES3
ENSMUSG00000071553	107.543	-1.83191	0.279612	-6.5516	5.69239e-11	2.72343e-09	Cpa2	HANDPHALANGES1	HANDPHALANGES3
ENSMUSG00000024665	2229.11	0.614944	0.0938927	6.54943	5.77555e-11	2.75658e-09	Fads2	HANDPHALANGES1	HANDPHALANGES3
ENSMUSG00000020022	1608.3	-0.984386	0.150361	-6.54682	5.87753e-11	2.79852e-09	Ndufa12	HANDPHALANGES1	HANDPHALANGES3
ENSMUSG00000031659	228.86	1.1409	0.174578	6.5352	6.35249e-11	3.01743e-09	Adcy7	HANDPHALANGES1	HANDPHALANGES3
ENSMUSG00000032249	350.217	-1.16479	0.178308	-6.53244	6.47071e-11	3.06047e-09	Anp32a	HANDPHALANGES1	HANDPHALANGES3
ENSMUSG00000079362	23.7372	6.29021	0.96293	6.53237	6.47391e-11	3.06047e-09	Gm43302	HANDPHALANGES1	HANDPHALANGES3
ENSMUSG00000027750	10596.8	1.0304	0.157945	6.52381	6.85439e-11	3.23263e-09	Postn	HANDPHALANGES1	HANDPHALANGES3
ENSMUSG00000031849	1262.68	1.22803	0.188268	6.52278	6.90175e-11	3.24726e-09	Comp	HANDPHALANGES1	HANDPHALANGES3
ENSMUSG00000001158	1340.67	-1.03168	0.158206	-6.52113	6.97809e-11	3.27541e-09	Snrnp27	HANDPHALANGES1	HANDPHALANGES3
ENSMUSG00000033475	791.281	-1.14948	0.176333	-6.51877	7.08878e-11	3.31952e-09	Tomm6	HANDPHALANGES1	HANDPHALANGES3
ENSMUSG00000024208	999.094	-1.21409	0.186303	-6.51676	7.18441e-11	3.35639e-09	Uqcc2	HANDPHALANGES1	HANDPHALANGES3
ENSMUSG00000046516	493.252	-0.938518	0.144024	-6.51638	7.20221e-11	3.3568e-09	Cox17	HANDPHALANGES1	HANDPHALANGES3
ENSMUSG00000090841	6196.17	-0.820842	0.125994	-6.51491	7.27314e-11	3.38193e-09	Myl6	HANDPHALANGES1	HANDPHALANGES3
ENSMUSG00000001025	1007.23	-1.35467	0.208143	-6.50836	7.59737e-11	3.52444e-09	S100a6	HANDPHALANGES1	HANDPHALANGES3
ENSMUSG00000078784	1636.09	-0.648207	0.099624	-6.50654	7.69009e-11	3.55913e-09	Rbis	HANDPHALANGES1	HANDPHALANGES3
ENSMUSG00000037242	5468.5	0.707132	0.108688	6.50605	7.71519e-11	3.56245e-09	Clic4	HANDPHALANGES1	HANDPHALANGES3
ENSMUSG00000026042	7465.51	0.750796	0.115468	6.50219	7.91595e-11	3.63941e-09	Col5a2	HANDPHALANGES1	HANDPHALANGES3
ENSMUSG00000029086	1374.26	0.897086	0.137972	6.50196	7.92825e-11	3.63941e-09	Prom1	HANDPHALANGES1	HANDPHALANGES3
ENSMUSG00000037003	3043.23	0.814459	0.125267	6.50179	7.93687e-11	3.63941e-09	Tns2	HANDPHALANGES1	HANDPHALANGES3
ENSMUSG00000034684	2168.29	0.826496	0.127128	6.50128	7.96373e-11	3.64332e-09	Sema3f	HANDPHALANGES1	HANDPHALANGES3
ENSMUSG00000072591	128.503	-1.56229	0.240751	-6.48925	8.62669e-11	3.93754e-09	Fzd10os	HANDPHALANGES1	HANDPHALANGES3
ENSMUSG00000019362	871.777	-1.10451	0.170246	-6.48769	8.71637e-11	3.96224e-09	D8Ertd738e	HANDPHALANGES1	HANDPHALANGES3
ENSMUSG00000037152	863.293	-1.27461	0.196468	-6.48761	8.72071e-11	3.96224e-09	Ndufc1	HANDPHALANGES1	HANDPHALANGES3
ENSMUSG00000031714	2129.21	0.899022	0.138641	6.48453	8.90073e-11	4.03479e-09	Gab1	HANDPHALANGES1	HANDPHALANGES3
ENSMUSG00000009876	340.44	-1.38854	0.214274	-6.4802	9.16029e-11	4.13458e-09	Cox4i2	HANDPHALANGES1	HANDPHALANGES3
ENSMUSG00000063696	1277.42	-1.20647	0.18618	-6.48016	9.16251e-11	4.13458e-09	Gm8730	HANDPHALANGES1	HANDPHALANGES3
ENSMUSG00000067847	1028.92	-1.31155	0.202466	-6.47789	9.30161e-11	4.18783e-09	Romo1	HANDPHALANGES1	HANDPHALANGES3
ENSMUSG00000031879	584.094	-0.917924	0.141726	-6.47677	9.37053e-11	4.20932e-09	Ciao2b	HANDPHALANGES1	HANDPHALANGES3
ENSMUSG00000090553	1970.59	-0.905226	0.139793	-6.47546	9.45221e-11	4.23642e-09	Snrpe	HANDPHALANGES1	HANDPHALANGES3
ENSMUSG00000041697	2923.06	-0.96488	0.149024	-6.47464	9.50364e-11	4.24988e-09	Cox6a1	HANDPHALANGES1	HANDPHALANGES3
ENSMUSG00000039221	1088.92	-1.16719	0.180457	-6.468	9.93112e-11	4.43107e-09	Rpl22l1	HANDPHALANGES1	HANDPHALANGES3
ENSMUSG00000035674	1086.15	-1.17668	0.181941	-6.4674	9.97037e-11	4.4386e-09	Ndufa3	HANDPHALANGES1	HANDPHALANGES3
ENSMUSG00000019027	696.982	0.724069	0.112059	6.46149	1.03676e-10	4.60511e-09	Dnah1	HANDPHALANGES1	HANDPHALANGES3
ENSMUSG00000021290	1179.56	-1.12469	0.174123	-6.45916	1.05286e-10	4.6662e-09	Atp5mj	HANDPHALANGES1	HANDPHALANGES3
ENSMUSG00000032744	185.272	1.74945	0.270905	6.45779	1.06241e-10	4.69804e-09	Heyl	HANDPHALANGES1	HANDPHALANGES3
ENSMUSG00000064345	4967.73	-0.874587	0.135481	-6.45543	1.0791e-10	4.76124e-09	mt-Nd2	HANDPHALANGES1	HANDPHALANGES3
ENSMUSG00000036835	1149.63	-0.944813	0.146368	-6.45505	1.08184e-10	4.76275e-09	Psenen	HANDPHALANGES1	HANDPHALANGES3
ENSMUSG00000025213	730.716	-1.00532	0.155873	-6.44958	1.12164e-10	4.92703e-09	Kazald1	HANDPHALANGES1	HANDPHALANGES3
ENSMUSG00000001020	223.531	-2.40818	0.373426	-6.44889	1.12671e-10	4.93838e-09	S100a4	HANDPHALANGES1	HANDPHALANGES3
ENSMUSG00000030037	780.92	-1.07289	0.166409	-6.44735	1.13824e-10	4.97792e-09	Mrpl53	HANDPHALANGES1	HANDPHALANGES3
ENSMUSG00000051355	1949.18	-0.886	0.137465	-6.44527	1.15398e-10	5.03565e-09	Commd1	HANDPHALANGES1	HANDPHALANGES3
ENSMUSG00000025375	349.685	1.64238	0.254912	6.44293	1.17189e-10	5.09142e-09	Aatk	HANDPHALANGES1	HANDPHALANGES3
ENSMUSG00000002319	1920.33	0.677159	0.105127	6.44137	1.18403e-10	5.13293e-09	Ipo4	HANDPHALANGES1	HANDPHALANGES3
ENSMUSG00000033938	1038.75	-1.17787	0.182947	-6.43832	1.208e-10	5.22545e-09	Ndufb7	HANDPHALANGES1	HANDPHALANGES3
ENSMUSG00000026821	2013.95	0.652719	0.101417	6.43597	1.22684e-10	5.29543e-09	Ralgds	HANDPHALANGES1	HANDPHALANGES3
ENSMUSG00000091625	587.872	-1.1374	0.176805	-6.43303	1.25084e-10	5.38727e-09	Lsm5	HANDPHALANGES1	HANDPHALANGES3
ENSMUSG00000020267	2641.69	-0.975006	0.151614	-6.43084	1.26905e-10	5.45388e-09	Hint1	HANDPHALANGES1	HANDPHALANGES3
ENSMUSG00000021660	4909.49	-0.978341	0.152196	-6.42815	1.29169e-10	5.53921e-09	Btf3	HANDPHALANGES1	HANDPHALANGES3
ENSMUSG00000027784	877.161	0.798126	0.12425	6.42353	1.33151e-10	5.69766e-09	Ppm1l	HANDPHALANGES1	HANDPHALANGES3
ENSMUSG00000020163	1607.29	-1.05092	0.163659	-6.42139	1.35033e-10	5.76577e-09	Uqcr11	HANDPHALANGES1	HANDPHALANGES3
ENSMUSG00000036578	150.809	-1.40664	0.219087	-6.42045	1.35868e-10	5.78896e-09	Fxyd7	HANDPHALANGES1	HANDPHALANGES3
ENSMUSG00000053647	327.831	1.30095	0.202772	6.4158	1.40084e-10	5.95584e-09	Gper1	HANDPHALANGES1	HANDPHALANGES3
ENSMUSG00000017466	13755.1	0.586337	0.09143	6.41296	1.42724e-10	6.05508e-09	Timp2	HANDPHALANGES1	HANDPHALANGES3
ENSMUSG00000019731	1324.44	0.83363	0.130011	6.41202	1.43605e-10	6.07948e-09	Slc35e1	HANDPHALANGES1	HANDPHALANGES3
ENSMUSG00000028998	1012.84	-1.14548	0.178678	-6.41088	1.44686e-10	6.1122e-09	Tomm7	HANDPHALANGES1	HANDPHALANGES3
ENSMUSG00000030417	1668.6	-0.875329	0.136572	-6.40928	1.46211e-10	6.16352e-09	Pdcd5	HANDPHALANGES1	HANDPHALANGES3
ENSMUSG00000029066	1276.68	-0.979524	0.152848	-6.4085	1.46958e-10	6.18188e-09	Mrpl20	HANDPHALANGES1	HANDPHALANGES3
ENSMUSG00000015575	2643.61	-0.876924	0.136896	-6.40578	1.49598e-10	6.27963e-09	Atp6v0e	HANDPHALANGES1	HANDPHALANGES3
ENSMUSG00000022820	858.536	-1.31358	0.205078	-6.40527	1.50105e-10	6.28763e-09	Ndufb4	HANDPHALANGES1	HANDPHALANGES3
ENSMUSG00000030222	267.486	1.41228	0.220499	6.40494	1.50431e-10	6.28802e-09	Rerg	HANDPHALANGES1	HANDPHALANGES3
ENSMUSG00000061315	5637.72	-0.868665	0.135718	-6.40052	1.54848e-10	6.45904e-09	Naca	HANDPHALANGES1	HANDPHALANGES3
ENSMUSG00000001497	57.2759	-4.18496	0.655275	-6.38657	1.69646e-10	7.06147e-09	Pax9	HANDPHALANGES1	HANDPHALANGES3
ENSMUSG00000042429	147.905	1.81948	0.284926	6.38581	1.70491e-10	7.08181e-09	Adora1	HANDPHALANGES1	HANDPHALANGES3
ENSMUSG00000061353	2973.05	0.720676	0.112921	6.38215	1.74623e-10	7.23828e-09	Cxcl12	HANDPHALANGES1	HANDPHALANGES3
ENSMUSG00000032518	10210.1	-0.941381	0.147527	-6.38107	1.75858e-10	7.27428e-09	Rpsa	HANDPHALANGES1	HANDPHALANGES3
ENSMUSG00000056612	1706.43	-1.01771	0.159562	-6.37814	1.79247e-10	7.39906e-09	Ppp1r14b	HANDPHALANGES1	HANDPHALANGES3
ENSMUSG00000035215	1759.76	-0.959298	0.1506	-6.36984	1.89223e-10	7.78794e-09	Lsm7	HANDPHALANGES1	HANDPHALANGES3
ENSMUSG00000101249	10645.2	-0.941577	0.147822	-6.36966	1.89452e-10	7.78794e-09	Gm29216	HANDPHALANGES1	HANDPHALANGES3
ENSMUSG00000040258	60.429	-2.67091	0.419441	-6.36779	1.91775e-10	7.86714e-09	Nxph4	HANDPHALANGES1	HANDPHALANGES3
ENSMUSG00000036412	2322.02	0.888273	0.139614	6.36235	1.98694e-10	8.13418e-09	Arsi	HANDPHALANGES1	HANDPHALANGES3
ENSMUSG00000020018	1143.66	-1.05918	0.166569	-6.3588	2.03334e-10	8.30697e-09	Snrpf	HANDPHALANGES1	HANDPHALANGES3
ENSMUSG00000058174	845.25	-1.40502	0.221048	-6.3562	2.06811e-10	8.43167e-09	Gm5148	HANDPHALANGES1	HANDPHALANGES3
ENSMUSG00000005054	1428.39	-0.968978	0.152568	-6.35112	2.13758e-10	8.67496e-09	Cstb	HANDPHALANGES1	HANDPHALANGES3
ENSMUSG00000010376	2874.07	-0.897631	0.141338	-6.35093	2.14016e-10	8.67496e-09	Nedd8	HANDPHALANGES1	HANDPHALANGES3
ENSMUSG00000027674	49.8692	3.12464	0.492001	6.35088	2.14089e-10	8.67496e-09	Pex5l	HANDPHALANGES1	HANDPHALANGES3
ENSMUSG00000074578	597.507	-1.01517	0.160004	-6.34467	2.22899e-10	9.01358e-09	Zfas1	HANDPHALANGES1	HANDPHALANGES3
ENSMUSG00000067274	12177.9	-0.861471	0.135866	-6.3406	2.28873e-10	9.23633e-09	Rplp0	HANDPHALANGES1	HANDPHALANGES3
ENSMUSG00000041881	1897.33	-1.01921	0.16109	-6.32694	2.5007e-10	1.00509e-08	Ndufa7	HANDPHALANGES1	HANDPHALANGES3
ENSMUSG00000064368	1871.78	-0.844605	0.133589	-6.32241	2.5752e-10	1.03294e-08	mt-Nd6	HANDPHALANGES1	HANDPHALANGES3
ENSMUSG00000022146	198.84	1.35647	0.21469	6.31826	2.64518e-10	1.05887e-08	Osmr	HANDPHALANGES1	HANDPHALANGES3
ENSMUSG00000048747	106.352	-2.24317	0.35545	-6.31078	2.77624e-10	1.1091e-08	E130114P18Rik	HANDPHALANGES1	HANDPHALANGES3
ENSMUSG00000061082	250.724	-1.62686	0.2579	-6.30809	2.82495e-10	1.12629e-08	Plac1	HANDPHALANGES1	HANDPHALANGES3
ENSMUSG00000024953	2605.46	-0.8442	0.133857	-6.30671	2.85026e-10	1.13184e-08	Prdx5	HANDPHALANGES1	HANDPHALANGES3
ENSMUSG00000048758	459.287	-1.15859	0.183699	-6.30699	2.84516e-10	1.13184e-08	Rpl29	HANDPHALANGES1	HANDPHALANGES3
ENSMUSG00000031818	4916.01	-0.967334	0.153416	-6.30529	2.87651e-10	1.13998e-08	Cox4i1	HANDPHALANGES1	HANDPHALANGES3
ENSMUSG00000037772	688.039	-1.04911	0.166681	-6.29411	3.09173e-10	1.2204e-08	Mrpl23	HANDPHALANGES1	HANDPHALANGES3
ENSMUSG00000078307	205.469	-1.66718	0.26487	-6.29433	3.0874e-10	1.2204e-08	AI593442	HANDPHALANGES1	HANDPHALANGES3
ENSMUSG00000091537	2347.79	-1.0216	0.162404	-6.29049	3.16463e-10	1.2467e-08	Tma7	HANDPHALANGES1	HANDPHALANGES3
ENSMUSG00000027524	351.498	1.40419	0.223352	6.28688	3.23902e-10	1.27205e-08	Edn3	HANDPHALANGES1	HANDPHALANGES3
ENSMUSG00000033022	3046.84	-0.863937	0.137422	-6.28675	3.2418e-10	1.27205e-08	Cdo1	HANDPHALANGES1	HANDPHALANGES3
ENSMUSG00000025967	3263.24	-0.88514	0.140809	-6.2861	3.25547e-10	1.2749e-08	Eef1b2	HANDPHALANGES1	HANDPHALANGES3
ENSMUSG00000087365	510.701	-0.934493	0.148738	-6.28281	3.32499e-10	1.29956e-08	Mir503hg	HANDPHALANGES1	HANDPHALANGES3
ENSMUSG00000073435	244.814	-1.17953	0.188121	-6.27007	3.60891e-10	1.40776e-08	Nme3	HANDPHALANGES1	HANDPHALANGES3
ENSMUSG00000064352	347.354	-1.61112	0.25698	-6.26942	3.62393e-10	1.41085e-08	mt-Ts1	HANDPHALANGES1	HANDPHALANGES3
ENSMUSG00000038602	336.725	1.01521	0.16202	6.26598	3.70497e-10	1.43957e-08	Slc35f1	HANDPHALANGES1	HANDPHALANGES3
ENSMUSG00000028461	785.833	-0.817487	0.130558	-6.26148	3.81333e-10	1.47878e-08	Ccdc107	HANDPHALANGES1	HANDPHALANGES3
ENSMUSG00000062683	1862.51	-1.06888	0.1708	-6.25809	3.89729e-10	1.5084e-08	Atp5mc2	HANDPHALANGES1	HANDPHALANGES3
ENSMUSG00000024346	975.405	-0.847139	0.135459	-6.25382	4.00535e-10	1.5472e-08	Pfdn1	HANDPHALANGES1	HANDPHALANGES3
ENSMUSG00000020271	2676.97	0.61838	0.0989911	6.24682	4.18893e-10	1.61498e-08	Fbxw11	HANDPHALANGES1	HANDPHALANGES3
ENSMUSG00000021357	1250.49	0.824573	0.132061	6.24388	4.26848e-10	1.63928e-08	Exoc2	HANDPHALANGES1	HANDPHALANGES3
ENSMUSG00000030607	2248.12	0.803405	0.128671	6.24389	4.26828e-10	1.63928e-08	Acan	HANDPHALANGES1	HANDPHALANGES3
ENSMUSG00000028648	1047.13	-1.01675	0.162873	-6.24263	4.30284e-10	1.64928e-08	Ndufs5	HANDPHALANGES1	HANDPHALANGES3
ENSMUSG00000066442	383.214	-0.976455	0.156492	-6.23963	4.38609e-10	1.67795e-08	Mthfs	HANDPHALANGES1	HANDPHALANGES3
ENSMUSG00000035048	532.539	-1.21813	0.19528	-6.23786	4.43604e-10	1.6938e-08	Anapc13	HANDPHALANGES1	HANDPHALANGES3
ENSMUSG00000019054	2233.13	-0.873271	0.14023	-6.2274	4.74236e-10	1.80728e-08	Fis1	HANDPHALANGES1	HANDPHALANGES3
ENSMUSG00000030020	199.506	1.21695	0.195736	6.21728	5.0586e-10	1.92411e-08	Prickle2	HANDPHALANGES1	HANDPHALANGES3
ENSMUSG00000006717	490.531	-0.923774	0.148666	-6.21374	5.17395e-10	1.95674e-08	Acot13	HANDPHALANGES1	HANDPHALANGES3
ENSMUSG00000036095	16.8699	6.73661	1.08414	6.2138	5.17182e-10	1.95674e-08	Dgkb	HANDPHALANGES1	HANDPHALANGES3
ENSMUSG00000047459	2945.02	-0.900034	0.144955	-6.20905	5.33049e-10	2.01211e-08	Dynlrb1	HANDPHALANGES1	HANDPHALANGES3
ENSMUSG00000027500	580.866	-1.14072	0.183949	-6.2013	5.59982e-10	2.10976e-08	Stmn2	HANDPHALANGES1	HANDPHALANGES3
ENSMUSG00000022890	4310.39	-0.845217	0.136307	-6.20085	5.6158e-10	2.11177e-08	Atp5pf	HANDPHALANGES1	HANDPHALANGES3
ENSMUSG00000075706	3152.31	-0.834162	0.134646	-6.1952	5.82106e-10	2.18482e-08	Gpx4	HANDPHALANGES1	HANDPHALANGES3
ENSMUSG00000051154	2210.54	-0.610361	0.0986861	-6.18488	6.21509e-10	2.32393e-08	Commd3	HANDPHALANGES1	HANDPHALANGES3
ENSMUSG00000020485	1219.94	-0.890664	0.144067	-6.18231	6.31717e-10	2.35324e-08	Supt4a	HANDPHALANGES1	HANDPHALANGES3
ENSMUSG00000028822	3317.5	-0.644844	0.104323	-6.1812	6.36155e-10	2.36533e-08	Tmem50a	HANDPHALANGES1	HANDPHALANGES3
ENSMUSG00000078453	550.413	-1.05101	0.170351	-6.16964	6.84473e-10	2.54023e-08	Abracl	HANDPHALANGES1	HANDPHALANGES3
ENSMUSG00000033717	40.0363	4.64741	0.753693	6.16618	6.99581e-10	2.58662e-08	Adra2a	HANDPHALANGES1	HANDPHALANGES3
ENSMUSG00000022479	189.129	2.37887	0.385821	6.16573	7.01572e-10	2.58917e-08	Vdr	HANDPHALANGES1	HANDPHALANGES3
ENSMUSG00000018666	1409.35	-0.765222	0.124148	-6.1638	7.10185e-10	2.61609e-08	Cbx1	HANDPHALANGES1	HANDPHALANGES3
ENSMUSG00000003660	2300.92	0.630842	0.102518	6.15347	7.58079e-10	2.78219e-08	Snrnp200	HANDPHALANGES1	HANDPHALANGES3
ENSMUSG00000066149	1811.56	-0.784724	0.127541	-6.1527	7.61748e-10	2.7905e-08	Cdc26	HANDPHALANGES1	HANDPHALANGES3
ENSMUSG00000010406	587.87	-1.28998	0.209698	-6.15161	7.66987e-10	2.80452e-08	Mrpl52	HANDPHALANGES1	HANDPHALANGES3
ENSMUSG00000020857	2693.46	-0.92856	0.151039	-6.14782	7.85574e-10	2.86194e-08	Nme2	HANDPHALANGES1	HANDPHALANGES3
ENSMUSG00000034981	759.226	1.15238	0.187438	6.14809	7.84233e-10	2.86194e-08	Parm1	HANDPHALANGES1	HANDPHALANGES3
ENSMUSG00000053317	2341.5	-0.959942	0.156259	-6.14328	8.08368e-10	2.93959e-08	Sec61b	HANDPHALANGES1	HANDPHALANGES3
ENSMUSG00000037379	313.707	-3.78984	0.617386	-6.13853	8.32887e-10	3.02321e-08	Spon2	HANDPHALANGES1	HANDPHALANGES3
ENSMUSG00000021764	1400.65	-0.836423	0.13631	-6.1362	8.45164e-10	3.06218e-08	Ndufs4	HANDPHALANGES1	HANDPHALANGES3
ENSMUSG00000007867	659.335	-0.736818	0.120096	-6.13522	8.50389e-10	3.0755e-08	Ift43	HANDPHALANGES1	HANDPHALANGES3
ENSMUSG00000003452	302.057	1.26695	0.206685	6.12985	8.79624e-10	3.17302e-08	Bicd1	HANDPHALANGES1	HANDPHALANGES3
ENSMUSG00000044067	39.5756	-3.2837	0.535705	-6.12968	8.80551e-10	3.17302e-08	Gpr22	HANDPHALANGES1	HANDPHALANGES3
ENSMUSG00000043342	52.6665	2.15446	0.35209	6.11904	9.41391e-10	3.37998e-08	Hoxd9	HANDPHALANGES1	HANDPHALANGES3
ENSMUSG00000050608	2008.99	-0.933569	0.152666	-6.11511	9.6489e-10	3.4581e-08	Micos10	HANDPHALANGES1	HANDPHALANGES3
ENSMUSG00000061436	1007.87	0.954688	0.156271	6.10918	1.00144e-09	3.58263e-08	Hipk2	HANDPHALANGES1	HANDPHALANGES3
ENSMUSG00000021758	28.6303	5.39301	0.883276	6.10569	1.02359e-09	3.65528e-08	Ddx4	HANDPHALANGES1	HANDPHALANGES3
ENSMUSG00000058267	1545.33	-0.88101	0.144318	-6.10467	1.03015e-09	3.67212e-08	Mrps14	HANDPHALANGES1	HANDPHALANGES3
ENSMUSG00000106229	201.001	1.07011	0.175416	6.10043	1.05782e-09	3.76397e-08	Gm19409	HANDPHALANGES1	HANDPHALANGES3
ENSMUSG00000038886	1622.41	0.804791	0.131932	6.10003	1.06049e-09	3.76672e-08	Man2a2	HANDPHALANGES1	HANDPHALANGES3
ENSMUSG00000109724	1249.1	-0.703617	0.115359	-6.09935	1.06502e-09	3.77606e-08	Gm18194	HANDPHALANGES1	HANDPHALANGES3
ENSMUSG00000021420	744.151	-0.784453	0.128638	-6.09816	1.07299e-09	3.79754e-08	Fars2	HANDPHALANGES1	HANDPHALANGES3
ENSMUSG00000026768	679.337	1.16909	0.191807	6.09514	1.09341e-09	3.86293e-08	Itga8	HANDPHALANGES1	HANDPHALANGES3
ENSMUSG00000073676	1290.97	-0.964936	0.158356	-6.09348	1.10485e-09	3.89642e-08	Hspe1	HANDPHALANGES1	HANDPHALANGES3
ENSMUSG00000045996	771.635	-1.00115	0.16454	-6.08458	1.16799e-09	4.11177e-08	Polr2k	HANDPHALANGES1	HANDPHALANGES3
ENSMUSG00000019978	2236.04	0.721675	0.118618	6.084	1.17218e-09	4.11922e-08	Epb41l2	HANDPHALANGES1	HANDPHALANGES3
ENSMUSG00000036850	818.018	-0.837299	0.137963	-6.069	1.28706e-09	4.51047e-08	Mrpl41	HANDPHALANGES1	HANDPHALANGES3
ENSMUSG00000107053	31.2082	-2.75565	0.454063	-6.06888	1.28806e-09	4.51047e-08	NA	HANDPHALANGES1	HANDPHALANGES3
ENSMUSG00000078713	1101.86	-0.848368	0.139839	-6.06673	1.30542e-09	4.56323e-08	Tomm5	HANDPHALANGES1	HANDPHALANGES3
ENSMUSG00000024534	2156.75	0.625669	0.103163	6.06487	1.32061e-09	4.6082e-08	Sncaip	HANDPHALANGES1	HANDPHALANGES3
ENSMUSG00000034932	1057.18	-1.11387	0.183721	-6.06287	1.33718e-09	4.65783e-08	Mrpl54	HANDPHALANGES1	HANDPHALANGES3
ENSMUSG00000041126	4462.95	-0.821057	0.135457	-6.06139	1.34946e-09	4.68419e-08	H2az2	HANDPHALANGES1	HANDPHALANGES3
ENSMUSG00000060882	227.105	1.53368	0.253021	6.06148	1.34876e-09	4.68419e-08	Kcnd2	HANDPHALANGES1	HANDPHALANGES3
ENSMUSG00000028766	2319.47	0.907252	0.149761	6.058	1.37828e-09	4.77588e-08	Alpl	HANDPHALANGES1	HANDPHALANGES3
ENSMUSG00000026238	19340.8	-0.727872	0.120171	-6.05697	1.38711e-09	4.79811e-08	Ptma	HANDPHALANGES1	HANDPHALANGES3
ENSMUSG00000036422	659.579	1.13872	0.18802	6.0564	1.392e-09	4.80663e-08	Pcdh8	HANDPHALANGES1	HANDPHALANGES3
ENSMUSG00000047061	213.326	-2.26787	0.374476	-6.0561	1.39457e-09	4.80715e-08		HANDPHALANGES1	HANDPHALANGES3
ENSMUSG00000027239	10755.4	-0.755358	0.124733	-6.05578	1.39737e-09	4.80845e-08	Mdk	HANDPHALANGES1	HANDPHALANGES3
ENSMUSG00000039105	4656.58	-0.682313	0.112711	-6.05364	1.41608e-09	4.8644e-08	Atp6v1g1	HANDPHALANGES1	HANDPHALANGES3
ENSMUSG00000042198	894.075	-0.952828	0.15741	-6.05317	1.42027e-09	4.87036e-08	Chchd7	HANDPHALANGES1	HANDPHALANGES3
ENSMUSG00000042541	3120.48	-0.963213	0.159255	-6.04823	1.46443e-09	5.01316e-08	Sem1	HANDPHALANGES1	HANDPHALANGES3
ENSMUSG00000091002	32.7103	4.08626	0.675822	6.04636	1.48155e-09	5.06302e-08	Tcerg1l	HANDPHALANGES1	HANDPHALANGES3
ENSMUSG00000027673	1831.92	-0.777955	0.12872	-6.0438	1.5053e-09	5.13535e-08	Ndufb5	HANDPHALANGES1	HANDPHALANGES3
ENSMUSG00000008090	3728.15	0.613386	0.101571	6.03899	1.55083e-09	5.28159e-08	Fgfrl1	HANDPHALANGES1	HANDPHALANGES3
ENSMUSG00000026078	1509.51	-0.584857	0.0968708	-6.03749	1.56528e-09	5.3207e-08	Pdcl3	HANDPHALANGES1	HANDPHALANGES3
ENSMUSG00000067870	184.496	-1.55886	0.258208	-6.03725	1.56767e-09	5.3207e-08	Rpl31-ps8	HANDPHALANGES1	HANDPHALANGES3
ENSMUSG00000026500	807.948	-0.827308	0.13725	-6.02774	1.66273e-09	5.6337e-08	Cox20	HANDPHALANGES1	HANDPHALANGES3
ENSMUSG00000039911	777.922	1.0069	0.167054	6.02737	1.66647e-09	5.63677e-08	Spsb1	HANDPHALANGES1	HANDPHALANGES3
ENSMUSG00000087075	383.498	-1.04897	0.174088	-6.02551	1.68572e-09	5.69219e-08	Lbhd2	HANDPHALANGES1	HANDPHALANGES3
ENSMUSG00000044147	2579.32	-0.688014	0.114205	-6.0244	1.69742e-09	5.72193e-08	Arf6	HANDPHALANGES1	HANDPHALANGES3
ENSMUSG00000024427	300.252	1.3512	0.224367	6.02228	1.71973e-09	5.78734e-08	Spry4	HANDPHALANGES1	HANDPHALANGES3
ENSMUSG00000039476	3251.73	-0.880307	0.146278	-6.01805	1.76529e-09	5.93059e-08	Prrx2	HANDPHALANGES1	HANDPHALANGES3
ENSMUSG00000032788	376.376	0.930018	0.154571	6.01677	1.77927e-09	5.96746e-08	Pdxk	HANDPHALANGES1	HANDPHALANGES3
ENSMUSG00000039234	2574.85	0.811514	0.134912	6.01513	1.79745e-09	6.01829e-08	Sec24d	HANDPHALANGES1	HANDPHALANGES3
ENSMUSG00000100005	122.361	1.43463	0.238549	6.01399	1.81006e-09	6.0503e-08	B130024G19Rik	HANDPHALANGES1	HANDPHALANGES3
ENSMUSG00000023830	2300.95	0.604619	0.100606	6.00979	1.85759e-09	6.19874e-08	Igf2r	HANDPHALANGES1	HANDPHALANGES3
ENSMUSG00000050989	3238.25	0.651013	0.108343	6.00883	1.86867e-09	6.22526e-08	Selenon	HANDPHALANGES1	HANDPHALANGES3
ENSMUSG00000010607	422.76	-1.12108	0.186655	-6.00619	1.89933e-09	6.31677e-08	Pigyl	HANDPHALANGES1	HANDPHALANGES3
ENSMUSG00000021759	2619.26	-0.581755	0.0968669	-6.00571	1.90496e-09	6.32492e-08	Plpp1	HANDPHALANGES1	HANDPHALANGES3
ENSMUSG00000060743	30973.3	-0.613023	0.10216	-6.00061	1.96573e-09	6.5158e-08	H3f3a	HANDPHALANGES1	HANDPHALANGES3
ENSMUSG00000101603	58.614	-2.16566	0.36138	-5.99276	2.06305e-09	6.82699e-08	Mir503hg	HANDPHALANGES1	HANDPHALANGES3
ENSMUSG00000004945	1682.74	-0.764532	0.127677	-5.98802	2.12405e-09	7.0055e-08	Tmem242	HANDPHALANGES1	HANDPHALANGES3
ENSMUSG00000039981	138.654	-1.96658	0.32841	-5.98819	2.12195e-09	7.0055e-08	Zc3h12d	HANDPHALANGES1	HANDPHALANGES3
ENSMUSG00000029245	499.627	-1.06159	0.177478	-5.98152	2.21062e-09	7.26685e-08	Epha5	HANDPHALANGES1	HANDPHALANGES3
ENSMUSG00000027447	4290.6	-0.824989	0.137986	-5.97878	2.2481e-09	7.36568e-08	Cst3	HANDPHALANGES1	HANDPHALANGES3
ENSMUSG00000036815	39.0752	4.02185	0.672757	5.97815	2.2568e-09	7.38199e-08	Dpp10	HANDPHALANGES1	HANDPHALANGES3
ENSMUSG00000030276	175.173	1.56005	0.261077	5.97546	2.29444e-09	7.49279e-08	Ttll3	HANDPHALANGES1	HANDPHALANGES3
ENSMUSG00000003380	2319.1	-0.833254	0.139484	-5.97385	2.31722e-09	7.54236e-08	Rabac1	HANDPHALANGES1	HANDPHALANGES3
ENSMUSG00000056737	564.806	-1.07205	0.179455	-5.9739	2.31642e-09	7.54236e-08	Capg	HANDPHALANGES1	HANDPHALANGES3
ENSMUSG00000066456	2212.94	-0.699229	0.117213	-5.96546	2.43948e-09	7.9273e-08	Hmgn3	HANDPHALANGES1	HANDPHALANGES3
ENSMUSG00000054920	844.368	0.841651	0.14116	5.96238	2.48596e-09	8.06514e-08	Klhl5	HANDPHALANGES1	HANDPHALANGES3
ENSMUSG00000058351	181.121	-1.36669	0.22923	-5.96208	2.49052e-09	8.06676e-08	Uqcc5	HANDPHALANGES1	HANDPHALANGES3
ENSMUSG00000003955	1818.11	-0.877728	0.147301	-5.95874	2.54188e-09	8.21972e-08	Fam162a	HANDPHALANGES1	HANDPHALANGES3
ENSMUSG00000025579	2323.06	0.825567	0.138607	5.95617	2.5822e-09	8.33652e-08	Gaa	HANDPHALANGES1	HANDPHALANGES3
ENSMUSG00000034858	581.945	0.748155	0.125623	5.95555	2.59196e-09	8.35444e-08	Atosa	HANDPHALANGES1	HANDPHALANGES3
ENSMUSG00000015766	438.586	1.33859	0.225002	5.94926	2.6936e-09	8.66799e-08	Eps8	HANDPHALANGES1	HANDPHALANGES3
ENSMUSG00000015804	2246.91	-0.678875	0.114242	-5.94245	2.80796e-09	9.02135e-08	Med28	HANDPHALANGES1	HANDPHALANGES3
ENSMUSG00000026032	1044.94	-0.872924	0.146906	-5.94206	2.81463e-09	9.0282e-08	Ndufb3	HANDPHALANGES1	HANDPHALANGES3
ENSMUSG00000069301	106.276	-1.50227	0.253055	-5.93653	2.9111e-09	9.32255e-08	H2ac11	HANDPHALANGES1	HANDPHALANGES3
ENSMUSG00000055994	14.1531	6.3407	1.06864	5.93345	2.96628e-09	9.46873e-08	Nod2	HANDPHALANGES1	HANDPHALANGES3
ENSMUSG00000084786	1119.12	-1.02728	0.173127	-5.93369	2.96204e-09	9.46873e-08	Ubl5	HANDPHALANGES1	HANDPHALANGES3
ENSMUSG00000018585	1215.07	-1.2037	0.202973	-5.93036	3.02277e-09	9.63356e-08	Atox1	HANDPHALANGES1	HANDPHALANGES3
ENSMUSG00000021606	1251.7	-0.91717	0.154671	-5.92982	3.03261e-09	9.64945e-08	Ndufs6	HANDPHALANGES1	HANDPHALANGES3
ENSMUSG00000028478	1941.26	-0.741008	0.124974	-5.92931	3.04219e-09	9.66442e-08	Clta	HANDPHALANGES1	HANDPHALANGES3
ENSMUSG00000025144	557.115	-1.06885	0.180313	-5.92771	3.07192e-09	9.70985e-08	Cenpx	HANDPHALANGES1	HANDPHALANGES3
ENSMUSG00000025997	63.0063	-1.89126	0.319026	-5.92823	3.06221e-09	9.70985e-08	Ikzf2	HANDPHALANGES1	HANDPHALANGES3
ENSMUSG00000039252	105.487	1.73403	0.292538	5.92753	3.07521e-09	9.70985e-08	Lgi2	HANDPHALANGES1	HANDPHALANGES3
ENSMUSG00000042155	909.184	0.915229	0.154404	5.92749	3.07605e-09	9.70985e-08	Klhl23	HANDPHALANGES1	HANDPHALANGES3
ENSMUSG00000064337	1652.78	-1.97411	0.333259	-5.92364	3.14893e-09	9.92412e-08	mt-Rnr1	HANDPHALANGES1	HANDPHALANGES3
ENSMUSG00000028278	107.845	2.01965	0.341023	5.92234	3.174e-09	9.98728e-08	Rragd	HANDPHALANGES1	HANDPHALANGES3
ENSMUSG00000032332	5435.15	0.691046	0.116727	5.92019	3.21566e-09	1.01024e-07	Col12a1	HANDPHALANGES1	HANDPHALANGES3
ENSMUSG00000042747	1543.37	-0.937168	0.158314	-5.91968	3.22574e-09	1.0118e-07	Krtcap2	HANDPHALANGES1	HANDPHALANGES3
ENSMUSG00000070044	676.091	0.875339	0.147925	5.91743	3.27009e-09	1.0241e-07	Fam149a	HANDPHALANGES1	HANDPHALANGES3
ENSMUSG00000032262	1180.05	-0.719334	0.121592	-5.91598	3.29911e-09	1.03156e-07	Elovl4	HANDPHALANGES1	HANDPHALANGES3
ENSMUSG00000034880	504.369	-1.13797	0.192482	-5.91211	3.37746e-09	1.05439e-07	Mrpl34	HANDPHALANGES1	HANDPHALANGES3
ENSMUSG00000000093	1136.21	-0.718947	0.121618	-5.9115	3.39004e-09	1.05563e-07	Tbx2	HANDPHALANGES1	HANDPHALANGES3
ENSMUSG00000060036	10651.4	-0.7128	0.120581	-5.9114	3.39205e-09	1.05563e-07	Rpl3	HANDPHALANGES1	HANDPHALANGES3
ENSMUSG00000059278	634.875	-1.14812	0.194488	-5.90332	3.56257e-09	1.10696e-07	Naa38	HANDPHALANGES1	HANDPHALANGES3
ENSMUSG00000029070	2262.43	0.640688	0.108599	5.89957	3.64446e-09	1.13064e-07	Mxra8	HANDPHALANGES1	HANDPHALANGES3
ENSMUSG00000026321	185.26	1.39818	0.237181	5.895	3.74691e-09	1.15401e-07	Tnfrsf11a	HANDPHALANGES1	HANDPHALANGES3
ENSMUSG00000026678	164.858	1.46909	0.249175	5.89584	3.72788e-09	1.15401e-07	Rgs5	HANDPHALANGES1	HANDPHALANGES3
ENSMUSG00000027499	678.235	0.940661	0.159552	5.89563	3.73247e-09	1.15401e-07	Pkia	HANDPHALANGES1	HANDPHALANGES3
ENSMUSG00000110350	5440.51	-1.03401	0.175408	-5.89491	3.74887e-09	1.15401e-07	Gm10252	HANDPHALANGES1	HANDPHALANGES3
ENSMUSG00000115423	232.925	-1.03683	0.175884	-5.89494	3.74826e-09	1.15401e-07	Gm56450	HANDPHALANGES1	HANDPHALANGES3
ENSMUSG00000024914	1545.25	-0.888799	0.150785	-5.89449	3.75848e-09	1.15518e-07	Drap1	HANDPHALANGES1	HANDPHALANGES3
ENSMUSG00000018567	4160.4	-0.785802	0.133324	-5.89393	3.77127e-09	1.15732e-07	Gabarap	HANDPHALANGES1	HANDPHALANGES3
ENSMUSG00000025743	4332.12	0.72796	0.12357	5.89108	3.83675e-09	1.17379e-07	Sdc3	HANDPHALANGES1	HANDPHALANGES3
ENSMUSG00000034330	286.542	1.20333	0.204259	5.89119	3.83415e-09	1.17379e-07	Plcg2	HANDPHALANGES1	HANDPHALANGES3
ENSMUSG00000047161	54.5075	3.5272	0.598937	5.88909	3.88318e-09	1.18616e-07	Chst9	HANDPHALANGES1	HANDPHALANGES3
ENSMUSG00000014313	2412.74	-1.00056	0.170087	-5.88264	4.03772e-09	1.23147e-07	Cox6c	HANDPHALANGES1	HANDPHALANGES3
ENSMUSG00000051579	2746.18	-0.658661	0.111989	-5.88145	4.06685e-09	1.23846e-07	Tceal8	HANDPHALANGES1	HANDPHALANGES3
ENSMUSG00000033581	1319.29	0.724228	0.123197	5.87863	4.13669e-09	1.25779e-07	Igf2bp2	HANDPHALANGES1	HANDPHALANGES3
ENSMUSG00000108443	262.336	-1.67492	0.285231	-5.87216	4.30154e-09	1.30592e-07	Gm44510	HANDPHALANGES1	HANDPHALANGES3
ENSMUSG00000036299	1557.48	-0.703102	0.119844	-5.86679	4.4431e-09	1.34684e-07	BC031181	HANDPHALANGES1	HANDPHALANGES3
ENSMUSG00000052033	321.078	-1.20201	0.204936	-5.86531	4.48303e-09	1.35274e-07	Pfdn4	HANDPHALANGES1	HANDPHALANGES3
ENSMUSG00000071451	325.905	-1.29172	0.220227	-5.86539	4.48077e-09	1.35274e-07	Psmg4	HANDPHALANGES1	HANDPHALANGES3
ENSMUSG00000107002	1016.27	-0.82777	0.141127	-5.86542	4.47987e-09	1.35274e-07	Ncbp2as2	HANDPHALANGES1	HANDPHALANGES3
ENSMUSG00002076161	67.023	-2.04518	0.34881	-5.8633	4.53769e-09	1.36716e-07	Rn7sk	HANDPHALANGES1	HANDPHALANGES3
ENSMUSG00000066407	141.574	-2.15462	0.367647	-5.86057	4.61271e-09	1.38766e-07	Gm10263	HANDPHALANGES1	HANDPHALANGES3
ENSMUSG00000050628	390.088	-1.10999	0.189616	-5.85389	4.80216e-09	1.44246e-07	Ubald2	HANDPHALANGES1	HANDPHALANGES3
ENSMUSG00000038615	2955.58	0.603282	0.103086	5.85224	4.84989e-09	1.4546e-07	Nfe2l1	HANDPHALANGES1	HANDPHALANGES3
ENSMUSG00000038622	464.293	-0.907055	0.155057	-5.84982	4.92115e-09	1.47375e-07	Med30	HANDPHALANGES1	HANDPHALANGES3
ENSMUSG00000120224	432.911	-1.09953	0.188049	-5.84705	5.00367e-09	1.4962e-07	2810001A02Rik	HANDPHALANGES1	HANDPHALANGES3
ENSMUSG00000039419	24.9642	2.7979	0.4795	5.83503	5.37795e-09	1.60534e-07	Cntnap2	HANDPHALANGES1	HANDPHALANGES3
ENSMUSG00000071369	269.643	1.26701	0.217146	5.83482	5.38481e-09	1.60534e-07	Map3k5	HANDPHALANGES1	HANDPHALANGES3
ENSMUSG00000000094	628.684	0.857284	0.146958	5.83354	5.42652e-09	1.61534e-07	Tbx4	HANDPHALANGES1	HANDPHALANGES3
ENSMUSG00000028514	701.24	-0.742283	0.127294	-5.83123	5.50189e-09	1.63533e-07	Usp24	HANDPHALANGES1	HANDPHALANGES3
ENSMUSG00000071014	1493.88	-0.918498	0.157602	-5.82796	5.61087e-09	1.66274e-07	Ndufb6	HANDPHALANGES1	HANDPHALANGES3
ENSMUSG00000021806	2407.23	0.792161	0.135931	5.82766	5.62108e-09	1.66286e-07	Nid2	HANDPHALANGES1	HANDPHALANGES3
ENSMUSG00000032575	1923.99	-0.800557	0.137377	-5.82745	5.62802e-09	1.66286e-07	Manf	HANDPHALANGES1	HANDPHALANGES3
ENSMUSG00000020224	656.113	-0.706651	0.12127	-5.82706	5.64107e-09	1.66424e-07	Llph	HANDPHALANGES1	HANDPHALANGES3
ENSMUSG00000022449	139.586	1.36827	0.234891	5.8251	5.70783e-09	1.68144e-07	Adamts20	HANDPHALANGES1	HANDPHALANGES3
ENSMUSG00000081406	980.355	-0.915892	0.157284	-5.82317	5.77434e-09	1.696e-07	Rps6-ps4	HANDPHALANGES1	HANDPHALANGES3
ENSMUSG00000022311	235.425	1.63528	0.281126	5.81691	5.99466e-09	1.75811e-07	Csmd3	HANDPHALANGES1	HANDPHALANGES3
ENSMUSG00000006519	1054.03	-0.784746	0.135016	-5.81223	6.16467e-09	1.80264e-07	Cyba	HANDPHALANGES1	HANDPHALANGES3
ENSMUSG00000033777	35.578	2.89499	0.498472	5.80773	6.33248e-09	1.84899e-07	Tlr13	HANDPHALANGES1	HANDPHALANGES3
ENSMUSG00000079022	225.385	1.60392	0.276183	5.80745	6.34322e-09	1.84941e-07	Col22a1	HANDPHALANGES1	HANDPHALANGES3
ENSMUSG00000039367	3290.38	0.70055	0.120727	5.80278	6.52255e-09	1.8989e-07	Sec24c	HANDPHALANGES1	HANDPHALANGES3
ENSMUSG00000021917	3458.48	-0.703286	0.121274	-5.79915	6.6652e-09	1.9371e-07	Spcs1	HANDPHALANGES1	HANDPHALANGES3
ENSMUSG00000036158	4017.46	0.639715	0.110316	5.79895	6.67326e-09	1.9371e-07	Prickle1	HANDPHALANGES1	HANDPHALANGES3
ENSMUSG00000020747	811.266	0.834126	0.14388	5.79738	6.73607e-09	1.94963e-07	Tmem94	HANDPHALANGES1	HANDPHALANGES3
ENSMUSG00000029649	2442.81	-0.735072	0.126791	-5.79753	6.73002e-09	1.94963e-07	Pomp	HANDPHALANGES1	HANDPHALANGES3
ENSMUSG00000001175	11758.6	-0.666456	0.114999	-5.79532	6.81895e-09	1.96801e-07	Calm1	HANDPHALANGES1	HANDPHALANGES3
ENSMUSG00000001802	925.817	1.11734	0.1928	5.79531	6.81938e-09	1.96801e-07	Lrp3	HANDPHALANGES1	HANDPHALANGES3
ENSMUSG00000021559	829.224	0.906635	0.156557	5.79108	6.99342e-09	2.0153e-07	Dapk1	HANDPHALANGES1	HANDPHALANGES3
ENSMUSG00000037405	461.415	0.907844	0.156856	5.78775	7.13362e-09	2.04976e-07	Icam1	HANDPHALANGES1	HANDPHALANGES3
ENSMUSG00000038759	937.452	0.652143	0.112692	5.78695	7.16765e-09	2.05387e-07	Nup205	HANDPHALANGES1	HANDPHALANGES3
ENSMUSG00000073700	1019.54	0.917902	0.158733	5.78268	7.35186e-09	2.10333e-07	Klhl21	HANDPHALANGES1	HANDPHALANGES3
ENSMUSG00000022400	4428.89	-0.709773	0.122784	-5.78066	7.44102e-09	2.12578e-07	Rbx1	HANDPHALANGES1	HANDPHALANGES3
ENSMUSG00000034220	3196.37	0.602824	0.10436	5.77641	7.6313e-09	2.177e-07	Gpc1	HANDPHALANGES1	HANDPHALANGES3
ENSMUSG00000056629	454.632	-0.86679	0.150118	-5.77407	7.73803e-09	2.20428e-07	Fkbp2	HANDPHALANGES1	HANDPHALANGES3
ENSMUSG00000005447	1831.6	-0.685064	0.118669	-5.7729	7.79182e-09	2.21643e-07	Pafah1b3	HANDPHALANGES1	HANDPHALANGES3
ENSMUSG00000022013	686.601	-0.961633	0.166601	-5.77208	7.83006e-09	2.22412e-07	Dnajc15	HANDPHALANGES1	HANDPHALANGES3
ENSMUSG00000030218	2774.21	-0.740219	0.128268	-5.77088	7.88581e-09	2.23675e-07	Mgp	HANDPHALANGES1	HANDPHALANGES3
ENSMUSG00000019782	1490.49	-0.804625	0.139498	-5.76799	8.02248e-09	2.27227e-07	Rwdd1	HANDPHALANGES1	HANDPHALANGES3
ENSMUSG00000023020	1581.47	-0.765753	0.132782	-5.76701	8.06889e-09	2.28216e-07	Cox14	HANDPHALANGES1	HANDPHALANGES3
ENSMUSG00000103309	482.699	0.895326	0.155298	5.7652	8.15633e-09	2.30361e-07	BC037039	HANDPHALANGES1	HANDPHALANGES3
ENSMUSG00000025665	671.151	1.01025	0.175281	5.76363	8.23259e-09	2.32185e-07	Rps6ka6	HANDPHALANGES1	HANDPHALANGES3
ENSMUSG00000034300	1975.31	0.704587	0.122267	5.76268	8.27867e-09	2.33153e-07	Fam53c	HANDPHALANGES1	HANDPHALANGES3
ENSMUSG00000042712	8229.82	-0.714113	0.124006	-5.75871	8.47595e-09	2.3778e-07	Tceal9	HANDPHALANGES1	HANDPHALANGES3
ENSMUSG00000047735	121.832	2.14228	0.372011	5.75865	8.47887e-09	2.3778e-07	Samd9l	HANDPHALANGES1	HANDPHALANGES3
ENSMUSG00000102579	74.1988	-2.96726	0.515267	-5.75868	8.4773e-09	2.3778e-07	Gm37965	HANDPHALANGES1	HANDPHALANGES3
ENSMUSG00000001864	1731.21	0.609426	0.105864	5.75671	8.57714e-09	2.40196e-07	Aif1l	HANDPHALANGES1	HANDPHALANGES3
ENSMUSG00000028643	1150.53	-1.02431	0.17798	-5.75521	8.65349e-09	2.41993e-07	Svbp	HANDPHALANGES1	HANDPHALANGES3
ENSMUSG00000037306	488.275	1.05841	0.184011	5.75186	8.82658e-09	2.46486e-07	Man1c1	HANDPHALANGES1	HANDPHALANGES3
ENSMUSG00000022174	3394.42	-0.691372	0.120212	-5.75128	8.8568e-09	2.46983e-07	Dad1	HANDPHALANGES1	HANDPHALANGES3
ENSMUSG00000050212	1274.26	-0.765157	0.133113	-5.74819	9.0206e-09	2.51198e-07	Eva1b	HANDPHALANGES1	HANDPHALANGES3
ENSMUSG00000117098	2425.28	-0.699153	0.121685	-5.7456	9.15972e-09	2.54714e-07	Gm49909	HANDPHALANGES1	HANDPHALANGES3
ENSMUSG00000015289	854.607	-0.917555	0.159739	-5.74409	9.24169e-09	2.56635e-07	Lage3	HANDPHALANGES1	HANDPHALANGES3
ENSMUSG00000022517	3014.41	0.589456	0.102636	5.74315	9.29289e-09	2.57696e-07	Mgrn1	HANDPHALANGES1	HANDPHALANGES3
ENSMUSG00000032649	528.186	0.979833	0.170634	5.74229	9.34044e-09	2.58653e-07	Colgalt2	HANDPHALANGES1	HANDPHALANGES3
ENSMUSG00000059974	1100.91	0.800683	0.139506	5.73943	9.4994e-09	2.62689e-07	Ntm	HANDPHALANGES1	HANDPHALANGES3
ENSMUSG00000054934	514.59	-0.747378	0.130229	-5.73897	9.52518e-09	2.63035e-07	Kcnmb4	HANDPHALANGES1	HANDPHALANGES3
ENSMUSG00000018401	1294.9	0.774468	0.135028	5.73561	9.71614e-09	2.67594e-07	Mtmr4	HANDPHALANGES1	HANDPHALANGES3
ENSMUSG00000038521	226.152	1.62407	0.283157	5.73559	9.71721e-09	2.67594e-07	C1s1	HANDPHALANGES1	HANDPHALANGES3
ENSMUSG00000084319	199.466	-1.24014	0.21627	-5.73425	9.7944e-09	2.69346e-07	Tpt1-ps3	HANDPHALANGES1	HANDPHALANGES3
ENSMUSG00000025381	2953.18	-0.734783	0.128221	-5.73058	1.00091e-08	2.74869e-07	Cnpy2	HANDPHALANGES1	HANDPHALANGES3
ENSMUSG00000002395	854.007	-0.890319	0.155513	-5.72503	1.03418e-08	2.83486e-07	Use1	HANDPHALANGES1	HANDPHALANGES3
ENSMUSG00000037493	457.711	-0.931755	0.162756	-5.72487	1.03514e-08	2.83486e-07	Cib2	HANDPHALANGES1	HANDPHALANGES3
ENSMUSG00000002020	916.69	-0.973907	0.170132	-5.72441	1.03792e-08	2.83855e-07	Ltbp2	HANDPHALANGES1	HANDPHALANGES3
ENSMUSG00000025026	1370.44	0.849258	0.148374	5.72376	1.04194e-08	2.84564e-07	Add3	HANDPHALANGES1	HANDPHALANGES3
ENSMUSG00000111765	76.76	3.07418	0.537185	5.72277	1.04802e-08	2.85829e-07	Gm10635	HANDPHALANGES1	HANDPHALANGES3
ENSMUSG00000037361	2050.04	-0.718328	0.125539	-5.72194	1.05314e-08	2.86833e-07	Sf3b6	HANDPHALANGES1	HANDPHALANGES3
ENSMUSG00000033444	1977.85	0.726828	0.127082	5.71937	1.06922e-08	2.90416e-07	Specc1l	HANDPHALANGES1	HANDPHALANGES3
ENSMUSG00000042682	3684.46	-0.702722	0.122888	-5.71839	1.07539e-08	2.91692e-07	Selenok	HANDPHALANGES1	HANDPHALANGES3
ENSMUSG00000004285	2025.17	-0.892532	0.156231	-5.71291	1.11061e-08	3.0049e-07	Atp6v1f	HANDPHALANGES1	HANDPHALANGES3
ENSMUSG00000018293	9221.5	-0.707904	0.123914	-5.71287	1.11085e-08	3.0049e-07	Pfn1	HANDPHALANGES1	HANDPHALANGES3
ENSMUSG00000021131	5473.27	-0.747948	0.130941	-5.71209	1.11594e-08	3.01457e-07	Erh	HANDPHALANGES1	HANDPHALANGES3
ENSMUSG00000024420	3552.5	0.87265	0.15294	5.70583	1.15777e-08	3.1208e-07	Zfp521	HANDPHALANGES1	HANDPHALANGES3
ENSMUSG00000066357	6935.71	0.640255	0.112213	5.70574	1.15841e-08	3.1208e-07	Wdr6	HANDPHALANGES1	HANDPHALANGES3
ENSMUSG00000026594	847.516	0.691402	0.121219	5.70376	1.17196e-08	3.15302e-07	Ralgps2	HANDPHALANGES1	HANDPHALANGES3
ENSMUSG00000021091	377.172	1.38556	0.243132	5.69878	1.20666e-08	3.24199e-07	Serpina3n	HANDPHALANGES1	HANDPHALANGES3
ENSMUSG00000003970	5154.62	-0.892815	0.156678	-5.6984	1.20936e-08	3.24484e-07	Rpl8	HANDPHALANGES1	HANDPHALANGES3
ENSMUSG00000014361	880.114	0.621839	0.109155	5.69684	1.22047e-08	3.27023e-07	Mertk	HANDPHALANGES1	HANDPHALANGES3
ENSMUSG00000056313	473.832	-0.828095	0.145466	-5.6927	1.25047e-08	3.3461e-07	Tcim	HANDPHALANGES1	HANDPHALANGES3
ENSMUSG00000034708	3638.75	0.593526	0.104297	5.69075	1.26485e-08	3.38003e-07	Grn	HANDPHALANGES1	HANDPHALANGES3
ENSMUSG00000096145	2028.06	-0.75467	0.132765	-5.68424	1.31395e-08	3.50651e-07	Vkorc1	HANDPHALANGES1	HANDPHALANGES3
ENSMUSG00000064354	25683.6	-0.687574	0.121051	-5.68004	1.34662e-08	3.58407e-07	mt-Co2	HANDPHALANGES1	HANDPHALANGES3
ENSMUSG00000002416	1605	-0.909148	0.160143	-5.67711	1.3699e-08	3.64113e-07	Ndufb2	HANDPHALANGES1	HANDPHALANGES3
ENSMUSG00000000416	1014.29	0.767322	0.135317	5.67055	1.4234e-08	3.77324e-07	Cttnbp2	HANDPHALANGES1	HANDPHALANGES3
ENSMUSG00000106037	73.5821	-2.0788	0.366584	-5.67074	1.42181e-08	3.77324e-07	Gm4332	HANDPHALANGES1	HANDPHALANGES3
ENSMUSG00000053565	1974.7	-0.841333	0.148439	-5.66788	1.44579e-08	3.82749e-07	Eif3k	HANDPHALANGES1	HANDPHALANGES3
ENSMUSG00000032440	3262.99	0.695661	0.122791	5.66541	1.46674e-08	3.86747e-07	Tgfbr2	HANDPHALANGES1	HANDPHALANGES3
ENSMUSG00000074800	94.4488	-1.71145	0.302077	-5.66559	1.46515e-08	3.86747e-07	Gm4149	HANDPHALANGES1	HANDPHALANGES3
ENSMUSG00000019906	53.9457	1.84719	0.326225	5.66231	1.49348e-08	3.93277e-07	Lin7a	HANDPHALANGES1	HANDPHALANGES3
ENSMUSG00000021575	116.661	1.82579	0.322648	5.65876	1.52469e-08	4.00964e-07	Ahrr	HANDPHALANGES1	HANDPHALANGES3
ENSMUSG00000042659	718.764	0.705068	0.124658	5.65604	1.54909e-08	4.06303e-07	Arrdc4	HANDPHALANGES1	HANDPHALANGES3
ENSMUSG00000015697	1638.65	0.713001	0.126077	5.65528	1.55597e-08	4.07058e-07	Setdb1	HANDPHALANGES1	HANDPHALANGES3
ENSMUSG00000021951	904.433	-0.776242	0.13726	-5.65526	1.55607e-08	4.07058e-07	Eef1akmt1	HANDPHALANGES1	HANDPHALANGES3
ENSMUSG00000028837	3695.56	-0.658028	0.11649	-5.64882	1.61556e-08	4.22065e-07	Psmb2	HANDPHALANGES1	HANDPHALANGES3
ENSMUSG00000026688	673.511	-1.21485	0.215174	-5.6459	1.64319e-08	4.28719e-07	Mgst3	HANDPHALANGES1	HANDPHALANGES3
ENSMUSG00000039703	1860.26	0.623372	0.110443	5.64428	1.65871e-08	4.322e-07	Nploc4	HANDPHALANGES1	HANDPHALANGES3
ENSMUSG00000073155	1751.03	-0.828276	0.146849	-5.64031	1.69743e-08	4.4171e-07	Stmp1	HANDPHALANGES1	HANDPHALANGES3
ENSMUSG00000054091	1063.82	-1.05953	0.18791	-5.63853	1.71512e-08	4.45146e-07	1810037I17Rik	HANDPHALANGES1	HANDPHALANGES3
ENSMUSG00000067786	4076.63	-0.867792	0.153899	-5.6387	1.71343e-08	4.45146e-07	Nnat	HANDPHALANGES1	HANDPHALANGES3
ENSMUSG00000020107	1258.41	-0.641819	0.113904	-5.63475	1.75313e-08	4.54417e-07	Anapc16	HANDPHALANGES1	HANDPHALANGES3
ENSMUSG00000010751	345.702	0.78521	0.139372	5.63391	1.76165e-08	4.56031e-07	Tnfrsf22	HANDPHALANGES1	HANDPHALANGES3
ENSMUSG00000064080	14601.5	0.660161	0.117194	5.63305	1.77051e-08	4.57727e-07	Fbln2	HANDPHALANGES1	HANDPHALANGES3
ENSMUSG00000050552	470.375	-0.938424	0.166606	-5.63259	1.77519e-08	4.58341e-07	Lamtor4	HANDPHALANGES1	HANDPHALANGES3
ENSMUSG00000026765	350.552	-1.02667	0.182291	-5.63201	1.78123e-08	4.59303e-07	Lypd6b	HANDPHALANGES1	HANDPHALANGES3
ENSMUSG00000050132	151.852	1.13232	0.20108	5.63118	1.78979e-08	4.60911e-07	Sarm1	HANDPHALANGES1	HANDPHALANGES3
ENSMUSG00000036504	1137.36	-0.925974	0.164494	-5.62923	1.81012e-08	4.65543e-07	Phpt1	HANDPHALANGES1	HANDPHALANGES3
ENSMUSG00000090264	18.8093	-6.30918	1.12138	-5.62628	1.84132e-08	4.72956e-07	Eif4ebp3	HANDPHALANGES1	HANDPHALANGES3
ENSMUSG00000042650	2304.3	0.620443	0.110317	5.62416	1.86411e-08	4.7819e-07	Alkbh5	HANDPHALANGES1	HANDPHALANGES3
ENSMUSG00000021388	6754	-0.624334	0.111068	-5.62118	1.89659e-08	4.85894e-07	Aspn	HANDPHALANGES1	HANDPHALANGES3
ENSMUSG00000032119	587.469	0.935165	0.166381	5.62064	1.9025e-08	4.8678e-07	Hinfp	HANDPHALANGES1	HANDPHALANGES3
ENSMUSG00000021991	443.663	0.894807	0.159228	5.61965	1.91344e-08	4.8895e-07	Cacna2d3	HANDPHALANGES1	HANDPHALANGES3
ENSMUSG00000025854	254.87	1.22848	0.21864	5.61871	1.92384e-08	4.90974e-07	Fam20c	HANDPHALANGES1	HANDPHALANGES3
ENSMUSG00000010803	59.2525	3.18513	0.566976	5.61775	1.93459e-08	4.93085e-07	Gabra1	HANDPHALANGES1	HANDPHALANGES3
ENSMUSG00000041215	1763.51	0.581443	0.103535	5.6159	1.95545e-08	4.97762e-07	Yeats2	HANDPHALANGES1	HANDPHALANGES3
ENSMUSG00000027533	2709.15	-0.961684	0.17136	-5.61206	1.99934e-08	5.08282e-07	Fabp5	HANDPHALANGES1	HANDPHALANGES3
ENSMUSG00000002957	3068.41	0.598792	0.106725	5.61061	2.01612e-08	5.11894e-07	Ap2a2	HANDPHALANGES1	HANDPHALANGES3
ENSMUSG00000015305	123.817	-1.43578	0.256072	-5.60694	2.05932e-08	5.20864e-07	Sash1	HANDPHALANGES1	HANDPHALANGES3
ENSMUSG00000038803	2800.73	-0.773284	0.137913	-5.60705	2.05801e-08	5.20864e-07	Ost4	HANDPHALANGES1	HANDPHALANGES3
ENSMUSG00000026930	1304.76	0.658393	0.117538	5.60151	2.12491e-08	5.36769e-07	Gpsm1	HANDPHALANGES1	HANDPHALANGES3
ENSMUSG00000024844	2538.53	-0.765342	0.136668	-5.59999	2.14358e-08	5.40112e-07	Banf1	HANDPHALANGES1	HANDPHALANGES3
ENSMUSG00000081094	538.507	-1.01077	0.180492	-5.60011	2.14212e-08	5.40112e-07	Rpl19-ps11	HANDPHALANGES1	HANDPHALANGES3
ENSMUSG00000014769	4407.1	-0.754482	0.134756	-5.59887	2.1575e-08	5.42931e-07	Psmb1	HANDPHALANGES1	HANDPHALANGES3
ENSMUSG00000031590	1109.13	-0.730361	0.130557	-5.59419	2.2166e-08	5.57095e-07	Frg1	HANDPHALANGES1	HANDPHALANGES3
ENSMUSG00000019437	1261.34	-1.13611	0.203103	-5.59379	2.22167e-08	5.57665e-07	Tlcd1	HANDPHALANGES1	HANDPHALANGES3
ENSMUSG00000056201	12506.5	-0.705739	0.126182	-5.59303	2.23141e-08	5.59403e-07	Cfl1	HANDPHALANGES1	HANDPHALANGES3
ENSMUSG00000098243	158.698	-1.32361	0.236696	-5.59203	2.24436e-08	5.61843e-07	NA	HANDPHALANGES1	HANDPHALANGES3
ENSMUSG00000073565	1440.42	0.71303	0.127519	5.59158	2.25011e-08	5.6196e-07	Prr16	HANDPHALANGES1	HANDPHALANGES3
ENSMUSG00000021136	447.725	1.04775	0.187468	5.58894	2.28462e-08	5.69863e-07	Smoc1	HANDPHALANGES1	HANDPHALANGES3
ENSMUSG00000065990	669.134	-0.753466	0.134853	-5.5873	2.30628e-08	5.74544e-07	Aurkaip1	HANDPHALANGES1	HANDPHALANGES3
ENSMUSG00000021556	1850.42	0.740022	0.132594	5.58112	2.38973e-08	5.9348e-07	Golm1	HANDPHALANGES1	HANDPHALANGES3
ENSMUSG00000034345	1240.69	-0.81754	0.146486	-5.58101	2.39126e-08	5.9348e-07	Gtf2h5	HANDPHALANGES1	HANDPHALANGES3
ENSMUSG00000026944	239.071	1.0941	0.19613	5.57847	2.42642e-08	6.01455e-07	Abca2	HANDPHALANGES1	HANDPHALANGES3
ENSMUSG00000009772	100.964	2.27768	0.40835	5.57776	2.43642e-08	6.0243e-07	Nuak2	HANDPHALANGES1	HANDPHALANGES3
ENSMUSG00000032243	1847.7	1.02024	0.182911	5.5778	2.43578e-08	6.0243e-07	Itga11	HANDPHALANGES1	HANDPHALANGES3
ENSMUSG00000055093	119.618	-1.55214	0.278292	-5.5774	2.4414e-08	6.02911e-07	Rps27a-ps3	HANDPHALANGES1	HANDPHALANGES3
ENSMUSG00000061482	186.857	-1.49815	0.26873	-5.57494	2.47612e-08	6.10725e-07	H4c4	HANDPHALANGES1	HANDPHALANGES3
ENSMUSG00000028447	650.416	-0.687167	0.123289	-5.57363	2.49484e-08	6.13817e-07	Dctn3	HANDPHALANGES1	HANDPHALANGES3
ENSMUSG00000059734	1933.35	-0.739334	0.132648	-5.57364	2.49475e-08	6.13817e-07	Ndufs8	HANDPHALANGES1	HANDPHALANGES3
ENSMUSG00000042349	168.982	1.25606	0.225458	5.57114	2.53075e-08	6.21579e-07	Ikbke	HANDPHALANGES1	HANDPHALANGES3
ENSMUSG00000087516	43.2173	-2.52753	0.453692	-5.57101	2.53265e-08	6.21579e-07	Tbx3os1	HANDPHALANGES1	HANDPHALANGES3
ENSMUSG00000034354	1867.12	0.794329	0.14262	5.56955	2.55402e-08	6.2605e-07	Mtmr3	HANDPHALANGES1	HANDPHALANGES3
ENSMUSG00000028832	9213.33	-0.600275	0.107864	-5.56511	2.61987e-08	6.41399e-07	Stmn1	HANDPHALANGES1	HANDPHALANGES3
ENSMUSG00000078144	114.586	-3.13532	0.56356	-5.56342	2.64534e-08	6.46838e-07	Capns2	HANDPHALANGES1	HANDPHALANGES3
ENSMUSG00000030122	475.238	-1.18107	0.212304	-5.56312	2.64996e-08	6.4717e-07	Ptms	HANDPHALANGES1	HANDPHALANGES3
ENSMUSG00000032434	1044.97	0.663618	0.119294	5.56286	2.65381e-08	6.47315e-07	Cmtm6	HANDPHALANGES1	HANDPHALANGES3
ENSMUSG00000026360	732.004	-0.641988	0.115434	-5.5615	2.67465e-08	6.51596e-07	Rgs2	HANDPHALANGES1	HANDPHALANGES3
ENSMUSG00000042737	224.12	-1.37386	0.247084	-5.56029	2.69321e-08	6.55315e-07	Dpm3	HANDPHALANGES1	HANDPHALANGES3
ENSMUSG00000020644	3752.7	-0.733851	0.132019	-5.5587	2.71795e-08	6.59744e-07	Id2	HANDPHALANGES1	HANDPHALANGES3
ENSMUSG00000082806	214.461	-1.51987	0.273462	-5.55788	2.73065e-08	6.61992e-07	Rpl13-ps1	HANDPHALANGES1	HANDPHALANGES3
ENSMUSG00000031835	5745.42	0.614121	0.110504	5.55743	2.73773e-08	6.62899e-07	Mbtps1	HANDPHALANGES1	HANDPHALANGES3
ENSMUSG00000062127	1223.97	0.631358	0.113633	5.55613	2.75819e-08	6.6704e-07	Cttnbp2nl	HANDPHALANGES1	HANDPHALANGES3
ENSMUSG00000064254	454.511	-0.950481	0.171078	-5.55583	2.763e-08	6.67389e-07	Ethe1	HANDPHALANGES1	HANDPHALANGES3
ENSMUSG00000025702	740.148	0.82267	0.148165	5.55237	2.8182e-08	6.77426e-07	Marchf8	HANDPHALANGES1	HANDPHALANGES3
ENSMUSG00000087260	1696.29	-0.685538	0.123467	-5.5524	2.81775e-08	6.77426e-07	Lamtor5	HANDPHALANGES1	HANDPHALANGES3
ENSMUSG00000016427	1231.91	-0.838281	0.151046	-5.54984	2.85939e-08	6.86495e-07	Ndufa1	HANDPHALANGES1	HANDPHALANGES3
ENSMUSG00000031198	756.257	-0.727836	0.131217	-5.54683	2.90895e-08	6.9755e-07	Fundc2	HANDPHALANGES1	HANDPHALANGES3
ENSMUSG00000104960	167.796	-1.31949	0.238227	-5.5388	3.04548e-08	7.2853e-07	Snhg8	HANDPHALANGES1	HANDPHALANGES3
ENSMUSG00000020000	1551.27	0.635876	0.114889	5.53472	3.11731e-08	7.43922e-07	Moxd1	HANDPHALANGES1	HANDPHALANGES3
ENSMUSG00000022265	354.692	0.883717	0.159754	5.53175	3.17055e-08	7.54811e-07	Ank	HANDPHALANGES1	HANDPHALANGES3
ENSMUSG00000021025	1836.03	-0.69543	0.125783	-5.5288	3.22424e-08	7.66675e-07	Nfkbia	HANDPHALANGES1	HANDPHALANGES3
ENSMUSG00000020831	804.072	-0.880998	0.159358	-5.52842	3.23122e-08	7.67415e-07	0610010K14Rik	HANDPHALANGES1	HANDPHALANGES3
ENSMUSG00000032908	57.0382	2.62103	0.474483	5.52397	3.31427e-08	7.8526e-07	Sgpp2	HANDPHALANGES1	HANDPHALANGES3
ENSMUSG00000038388	1213.29	0.645337	0.116824	5.52401	3.31343e-08	7.8526e-07	Pals2	HANDPHALANGES1	HANDPHALANGES3
ENSMUSG00000073656	86.0672	-1.44948	0.26241	-5.52372	3.31899e-08	7.85441e-07	Gm10558	HANDPHALANGES1	HANDPHALANGES3
ENSMUSG00000034707	2278.4	0.715297	0.129544	5.52166	3.35809e-08	7.93748e-07	Gns	HANDPHALANGES1	HANDPHALANGES3
ENSMUSG00000022452	1062.51	-0.877432	0.158951	-5.52014	3.38736e-08	7.99715e-07	Smdt1	HANDPHALANGES1	HANDPHALANGES3
ENSMUSG00000026893	73.4623	2.39749	0.434716	5.51508	3.4863e-08	8.22097e-07	Gca	HANDPHALANGES1	HANDPHALANGES3
ENSMUSG00000047250	536.394	-0.828392	0.150298	-5.51168	3.55426e-08	8.37126e-07	Ptgs1	HANDPHALANGES1	HANDPHALANGES3
ENSMUSG00000015943	337.624	-0.969536	0.17623	-5.50153	3.7651e-08	8.77419e-07	Bola1	HANDPHALANGES1	HANDPHALANGES3
ENSMUSG00000025260	2462.47	-0.666978	0.121201	-5.50306	3.73262e-08	8.77419e-07	Hsd17b10	HANDPHALANGES1	HANDPHALANGES3
ENSMUSG00000029212	28.1962	3.32102	0.603518	5.50277	3.73864e-08	8.77419e-07	Gabrb1	HANDPHALANGES1	HANDPHALANGES3
ENSMUSG00000067575	210.19	-1.34625	0.244702	-5.50161	3.76341e-08	8.77419e-07	Rpl35a-ps3	HANDPHALANGES1	HANDPHALANGES3
ENSMUSG00000081214	210.19	-1.34625	0.244702	-5.50161	3.76341e-08	8.77419e-07	Rpl35a-ps2	HANDPHALANGES1	HANDPHALANGES3
ENSMUSG00000083424	210.19	-1.34625	0.244702	-5.50161	3.76341e-08	8.77419e-07	Rpl35a-ps4	HANDPHALANGES1	HANDPHALANGES3
ENSMUSG00000090122	882.783	-0.77082	0.140103	-5.50181	3.75921e-08	8.77419e-07	Kcne5	HANDPHALANGES1	HANDPHALANGES3
ENSMUSG00000094664	210.19	-1.34625	0.244702	-5.50161	3.76341e-08	8.77419e-07	Rpl35a-ps6	HANDPHALANGES1	HANDPHALANGES3
ENSMUSG00000095526	210.19	-1.34625	0.244702	-5.50161	3.76341e-08	8.77419e-07	Gm10243	HANDPHALANGES1	HANDPHALANGES3
ENSMUSG00000007721	911.569	-0.786897	0.143127	-5.4979	3.84338e-08	8.9461e-07	Ccdc124	HANDPHALANGES1	HANDPHALANGES3
ENSMUSG00000097789	113.548	-1.55064	0.282132	-5.49614	3.88203e-08	9.0255e-07	Ctxnd1	HANDPHALANGES1	HANDPHALANGES3
ENSMUSG00000015092	1567.6	-0.883778	0.161027	-5.48837	4.05654e-08	9.4202e-07	Edf1	HANDPHALANGES1	HANDPHALANGES3
ENSMUSG00000030335	1399.71	-0.735351	0.134007	-5.48742	4.07854e-08	9.4602e-07	Mrpl51	HANDPHALANGES1	HANDPHALANGES3
ENSMUSG00000037742	53105.4	-0.604422	0.110338	-5.47792	4.30344e-08	9.97023e-07	Eef1a1	HANDPHALANGES1	HANDPHALANGES3
ENSMUSG00000027419	155.861	-1.34131	0.24495	-5.47584	4.35445e-08	1.00766e-06	Pcsk2	HANDPHALANGES1	HANDPHALANGES3
ENSMUSG00000040152	5110.52	0.704924	0.128753	5.47501	4.37498e-08	1.01124e-06	Thbs1	HANDPHALANGES1	HANDPHALANGES3
ENSMUSG00000060032	754.129	-1.13514	0.207464	-5.47152	4.46181e-08	1.03011e-06	H2aj	HANDPHALANGES1	HANDPHALANGES3
ENSMUSG00000016763	987.173	1.09081	0.199379	5.47105	4.47368e-08	1.03165e-06	Scube1	HANDPHALANGES1	HANDPHALANGES3
ENSMUSG00000022956	3768.23	-0.767995	0.140572	-5.46336	4.67199e-08	1.07488e-06	Atp5po	HANDPHALANGES1	HANDPHALANGES3
ENSMUSG00000031274	332.061	1.27701	0.233761	5.4629	4.68423e-08	1.07645e-06	Col4a5	HANDPHALANGES1	HANDPHALANGES3
ENSMUSG00000024268	151.862	-1.1624	0.213087	-5.45505	4.89591e-08	1.1238e-06	Celf4	HANDPHALANGES1	HANDPHALANGES3
ENSMUSG00000034290	1148.04	0.646647	0.118606	5.45205	4.97917e-08	1.14159e-06	Nek9	HANDPHALANGES1	HANDPHALANGES3
ENSMUSG00000041203	1729.92	-0.864228	0.158538	-5.45123	5.00222e-08	1.14555e-06	Trir	HANDPHALANGES1	HANDPHALANGES3
ENSMUSG00000075702	1034.83	-0.920319	0.168858	-5.45024	5.03017e-08	1.1493e-06	Selenom	HANDPHALANGES1	HANDPHALANGES3
ENSMUSG00000018102	267.962	-0.928037	0.170402	-5.44617	5.14669e-08	1.17457e-06	H2bc4	HANDPHALANGES1	HANDPHALANGES3
ENSMUSG00000061474	476.443	-0.892665	0.164141	-5.43841	5.37571e-08	1.22543e-06	Mrps36	HANDPHALANGES1	HANDPHALANGES3
ENSMUSG00000043631	989.218	-0.829741	0.152656	-5.43535	5.46884e-08	1.24523e-06	Ecm2	HANDPHALANGES1	HANDPHALANGES3
ENSMUSG00000030319	1844.09	0.706082	0.12992	5.43474	5.48752e-08	1.24805e-06	Cand2	HANDPHALANGES1	HANDPHALANGES3
ENSMUSG00000097850	51.9285	-3.01229	0.554339	-5.43403	5.50969e-08	1.25166e-06	Mir205hg	HANDPHALANGES1	HANDPHALANGES3
ENSMUSG00000005268	92.6602	2.02681	0.373347	5.42875	5.67491e-08	1.28625e-06	Prlr	HANDPHALANGES1	HANDPHALANGES3
ENSMUSG00000017188	1406.68	-0.854868	0.157501	-5.4277	5.7086e-08	1.29094e-06	Coa3	HANDPHALANGES1	HANDPHALANGES3
ENSMUSG00000020440	4072.04	-0.663578	0.122254	-5.42785	5.70369e-08	1.29094e-06	Arf5	HANDPHALANGES1	HANDPHALANGES3
ENSMUSG00000036206	953.5	0.676571	0.124758	5.42306	5.85873e-08	1.32338e-06	Sh3bp4	HANDPHALANGES1	HANDPHALANGES3
ENSMUSG00000027597	780.154	0.870073	0.160453	5.42261	5.87367e-08	1.32525e-06	Ahcy	HANDPHALANGES1	HANDPHALANGES3
ENSMUSG00000032278	159.943	-2.41058	0.444639	-5.42143	5.91256e-08	1.33251e-06	Paqr5	HANDPHALANGES1	HANDPHALANGES3
ENSMUSG00000028497	382.353	-1.2008	0.221549	-5.42001	5.95963e-08	1.34007e-06	Hacd4	HANDPHALANGES1	HANDPHALANGES3
ENSMUSG00000028609	1043.43	-0.845783	0.156043	-5.42021	5.95302e-08	1.34007e-06	Magoh	HANDPHALANGES1	HANDPHALANGES3
ENSMUSG00000081051	398.994	-1.03347	0.190698	-5.41942	5.97932e-08	1.34298e-06	Gm15427	HANDPHALANGES1	HANDPHALANGES3
ENSMUSG00000027160	682.673	-0.857198	0.158206	-5.41824	6.01893e-08	1.35035e-06	Ccdc34	HANDPHALANGES1	HANDPHALANGES3
ENSMUSG00000020312	358.562	0.80301	0.14822	5.4177	6.03709e-08	1.3529e-06	Shc2	HANDPHALANGES1	HANDPHALANGES3
ENSMUSG00000024646	2220.28	-0.799711	0.147624	-5.41722	6.05335e-08	1.35501e-06	Cyb5a	HANDPHALANGES1	HANDPHALANGES3
ENSMUSG00000059518	508.374	-0.928798	0.171479	-5.4164	6.08117e-08	1.3597e-06	Znhit1	HANDPHALANGES1	HANDPHALANGES3
ENSMUSG00000062981	1871.16	-0.652814	0.120541	-5.41572	6.10434e-08	1.36335e-06	Mrpl42	HANDPHALANGES1	HANDPHALANGES3
ENSMUSG00000026966	1898.45	-0.724866	0.133858	-5.41517	6.12316e-08	1.36601e-06	Ssna1	HANDPHALANGES1	HANDPHALANGES3
ENSMUSG00000045854	464.872	-0.850871	0.157237	-5.41139	6.25389e-08	1.39361e-06	Lyrm2	HANDPHALANGES1	HANDPHALANGES3
ENSMUSG00000008305	1884.6	0.586838	0.108479	5.40969	6.31344e-08	1.40531e-06	Tle1	HANDPHALANGES1	HANDPHALANGES3
ENSMUSG00000104444	192.036	-1.51179	0.279515	-5.40862	6.35117e-08	1.41212e-06	Gm33051	HANDPHALANGES1	HANDPHALANGES3
ENSMUSG00000042670	1245.23	-0.690654	0.127715	-5.40775	6.38199e-08	1.41739e-06	Immp1l	HANDPHALANGES1	HANDPHALANGES3
ENSMUSG00000027188	1773.42	0.687264	0.127126	5.40616	6.43887e-08	1.42842e-06	Pamr1	HANDPHALANGES1	HANDPHALANGES3
ENSMUSG00000001150	903.317	0.629093	0.11638	5.40553	6.46178e-08	1.4319e-06	Mcm3ap	HANDPHALANGES1	HANDPHALANGES3
ENSMUSG00000040269	613.215	-0.95179	0.176114	-5.40441	6.50225e-08	1.43927e-06	Mrps28	HANDPHALANGES1	HANDPHALANGES3
ENSMUSG00000002477	1492.12	-0.709996	0.131404	-5.40317	6.54724e-08	1.44761e-06	Snrpd1	HANDPHALANGES1	HANDPHALANGES3
ENSMUSG00000020806	286.874	1.10675	0.204841	5.40295	6.55553e-08	1.44783e-06	Rhbdf2	HANDPHALANGES1	HANDPHALANGES3
ENSMUSG00000071001	215.915	-1.23556	0.228738	-5.40166	6.60266e-08	1.45662e-06	Hrct1	HANDPHALANGES1	HANDPHALANGES3
ENSMUSG00000068240	382.672	-1.1378	0.210648	-5.40143	6.61108e-08	1.45686e-06	Uba52rt	HANDPHALANGES1	HANDPHALANGES3
ENSMUSG00000028780	3696.74	1.00077	0.18539	5.39818	6.7319e-08	1.48184e-06	Sema3c	HANDPHALANGES1	HANDPHALANGES3
ENSMUSG00000006589	1687.07	-0.734592	0.13613	-5.39625	6.80478e-08	1.49622e-06	Aprt	HANDPHALANGES1	HANDPHALANGES3
ENSMUSG00000020180	2582.58	-0.657628	0.121917	-5.39407	6.88791e-08	1.50782e-06	Snrpd3	HANDPHALANGES1	HANDPHALANGES3
ENSMUSG00000066438	13.0526	5.85919	1.08621	5.39415	6.88493e-08	1.50782e-06	Plekhd1	HANDPHALANGES1	HANDPHALANGES3
ENSMUSG00000024242	1954.06	0.713265	0.13225	5.39329	6.91806e-08	1.51275e-06	Map4k3	HANDPHALANGES1	HANDPHALANGES3
ENSMUSG00000087412	211.758	-1.26903	0.235422	-5.39045	7.02798e-08	1.5351e-06	Gm15501	HANDPHALANGES1	HANDPHALANGES3
ENSMUSG00000086841	526.463	-1.06935	0.198463	-5.38815	7.11885e-08	1.55324e-06	2410006H16Rik	HANDPHALANGES1	HANDPHALANGES3
ENSMUSG00000020803	1756.09	-0.746063	0.138494	-5.38697	7.16548e-08	1.5617e-06	Txndc17	HANDPHALANGES1	HANDPHALANGES3
ENSMUSG00000057454	674.297	-4.42911	0.822678	-5.38378	7.2939e-08	1.58794e-06	Lypd3	HANDPHALANGES1	HANDPHALANGES3
ENSMUSG00000062580	1869.36	-0.663635	0.123302	-5.38219	7.3583e-08	1.60021e-06	Timm17a	HANDPHALANGES1	HANDPHALANGES3
ENSMUSG00000002233	1692.68	-0.745643	0.13855	-5.38177	7.37579e-08	1.60065e-06	Rhoc	HANDPHALANGES1	HANDPHALANGES3
ENSMUSG00000027907	1697.65	-0.968143	0.179895	-5.38171	7.37835e-08	1.60065e-06	S100a11	HANDPHALANGES1	HANDPHALANGES3
ENSMUSG00000070493	7884.06	-0.728172	0.135309	-5.38155	7.38454e-08	1.60065e-06	Chchd2	HANDPHALANGES1	HANDPHALANGES3
ENSMUSG00000027952	625.253	-0.733658	0.136384	-5.37935	7.47563e-08	1.6169e-06	Pmvk	HANDPHALANGES1	HANDPHALANGES3
ENSMUSG00000035469	1885.42	0.592253	0.110098	5.37934	7.47576e-08	1.6169e-06	Rcbtb1	HANDPHALANGES1	HANDPHALANGES3
ENSMUSG00000036334	1843.78	0.690752	0.128442	5.37795	7.53407e-08	1.62774e-06	Igsf10	HANDPHALANGES1	HANDPHALANGES3
ENSMUSG00000060419	129.244	-1.55703	0.289545	-5.37751	7.55237e-08	1.62815e-06	Rps16-ps2	HANDPHALANGES1	HANDPHALANGES3
ENSMUSG00000049881	380.259	-0.947476	0.176283	-5.37475	7.66899e-08	1.65149e-06	2810025M15Rik	HANDPHALANGES1	HANDPHALANGES3
ENSMUSG00000032504	1752.4	0.604892	0.112592	5.37243	7.76811e-08	1.66922e-06	Pdcd6ip	HANDPHALANGES1	HANDPHALANGES3
ENSMUSG00000022354	2778.6	-0.824924	0.153569	-5.3717	7.79967e-08	1.67419e-06	Ndufb9	HANDPHALANGES1	HANDPHALANGES3
ENSMUSG00000043801	620.815	-0.692958	0.129049	-5.36971	7.88647e-08	1.69099e-06	Oaz1-ps	HANDPHALANGES1	HANDPHALANGES3
ENSMUSG00000062619	454.585	-1.02907	0.191659	-5.36926	7.90605e-08	1.69336e-06	2310039H08Rik	HANDPHALANGES1	HANDPHALANGES3
ENSMUSG00000079055	174.764	1.3537	0.252237	5.36678	8.01557e-08	1.71497e-06	Slc8a3	HANDPHALANGES1	HANDPHALANGES3
ENSMUSG00000087497	375.224	-0.71135	0.132611	-5.36419	8.13122e-08	1.73784e-06	2810001G20Rik	HANDPHALANGES1	HANDPHALANGES3
ENSMUSG00000001665	518.707	0.788207	0.146981	5.36264	8.20155e-08	1.75099e-06	Gstt3	HANDPHALANGES1	HANDPHALANGES3
ENSMUSG00000033209	801.507	0.734544	0.136999	5.36167	8.24578e-08	1.75854e-06	Ttc28	HANDPHALANGES1	HANDPHALANGES3
ENSMUSG00000049299	852.814	-0.804988	0.150146	-5.36138	8.25872e-08	1.75941e-06	Trappc1	HANDPHALANGES1	HANDPHALANGES3
ENSMUSG00000059336	96.6891	2.2601	0.421645	5.36019	8.31335e-08	1.76915e-06	Slc14a1	HANDPHALANGES1	HANDPHALANGES3
ENSMUSG00000042312	214.111	-1.42605	0.266089	-5.35929	8.355e-08	1.77611e-06	S100a13	HANDPHALANGES1	HANDPHALANGES3
ENSMUSG00000025139	1549.67	0.608659	0.113627	5.35662	8.47942e-08	1.80063e-06	Tollip	HANDPHALANGES1	HANDPHALANGES3
ENSMUSG00000024925	527.077	-0.989769	0.184796	-5.35601	8.50809e-08	1.80479e-06	Rnaseh2c	HANDPHALANGES1	HANDPHALANGES3
ENSMUSG00000040883	423.318	-0.739325	0.13837	-5.3431	9.13687e-08	1.93404e-06	Tmem205	HANDPHALANGES1	HANDPHALANGES3
ENSMUSG00000005779	2734.14	-0.663389	0.124179	-5.34221	9.18209e-08	1.94154e-06	Psmb4	HANDPHALANGES1	HANDPHALANGES3
ENSMUSG00000029402	237.226	-0.816403	0.153031	-5.33487	9.56129e-08	2.01957e-06	Snrnp35	HANDPHALANGES1	HANDPHALANGES3
ENSMUSG00000063297	10.3793	6.1801	1.15941	5.33038	9.80058e-08	2.06572e-06	Luzp2	HANDPHALANGES1	HANDPHALANGES3
ENSMUSG00000064246	165.494	1.67274	0.313804	5.33052	9.79316e-08	2.06572e-06	Chi3l1	HANDPHALANGES1	HANDPHALANGES3
ENSMUSG00000018286	5852.68	-0.72517	0.136077	-5.32913	9.86841e-08	2.07781e-06	Psmb6	HANDPHALANGES1	HANDPHALANGES3
ENSMUSG00000003072	2926.12	-0.745164	0.139839	-5.32872	9.89062e-08	2.08028e-06	Atp5f1d	HANDPHALANGES1	HANDPHALANGES3
ENSMUSG00000060802	2091.27	-0.591549	0.111067	-5.32607	1.00363e-07	2.10869e-06	B2m	HANDPHALANGES1	HANDPHALANGES3
ENSMUSG00000037894	13409.6	-0.6661	0.125105	-5.32434	1.01321e-07	2.12656e-06	H2az1	HANDPHALANGES1	HANDPHALANGES3
ENSMUSG00000031328	8241.56	0.592801	0.111369	5.32288	1.02139e-07	2.13696e-06	Flna	HANDPHALANGES1	HANDPHALANGES3
ENSMUSG00000039163	225.205	-1.19608	0.224706	-5.32289	1.02133e-07	2.13696e-06	Cmc1	HANDPHALANGES1	HANDPHALANGES3
ENSMUSG00000080058	537.186	-1.03499	0.194428	-5.32325	1.01932e-07	2.13696e-06	Gm11175	HANDPHALANGES1	HANDPHALANGES3
ENSMUSG00000021996	2542.13	-0.65371	0.122836	-5.32183	1.02729e-07	2.14704e-06	Esd	HANDPHALANGES1	HANDPHALANGES3
ENSMUSG00000027834	351.022	0.953021	0.179143	5.3199	1.03823e-07	2.16533e-06	Serpini1	HANDPHALANGES1	HANDPHALANGES3
ENSMUSG00000051279	321.815	-0.990669	0.186213	-5.32009	1.03718e-07	2.16533e-06	Gdf6	HANDPHALANGES1	HANDPHALANGES3
ENSMUSG00000021779	46.3072	2.20331	0.414193	5.31951	1.04047e-07	2.16774e-06	Thrb	HANDPHALANGES1	HANDPHALANGES3
ENSMUSG00000049907	3767.08	-0.583411	0.109714	-5.31754	1.05181e-07	2.18906e-06	Rasl11b	HANDPHALANGES1	HANDPHALANGES3
ENSMUSG00000055214	27.7913	4.46734	0.840392	5.31579	1.06198e-07	2.20792e-06	Pld5	HANDPHALANGES1	HANDPHALANGES3
ENSMUSG00000036819	273.589	1.07504	0.202389	5.31175	1.08576e-07	2.25296e-06	Jmjd4	HANDPHALANGES1	HANDPHALANGES3
ENSMUSG00000038722	1548.1	-0.716213	0.134836	-5.31173	1.08592e-07	2.25296e-06	Bud31	HANDPHALANGES1	HANDPHALANGES3
ENSMUSG00000045333	1150.87	0.698527	0.131536	5.31054	1.09298e-07	2.26525e-06	Zfp423	HANDPHALANGES1	HANDPHALANGES3
ENSMUSG00000007039	3686.07	-0.59259	0.111612	-5.30936	1.10012e-07	2.2753e-06	Ddah2	HANDPHALANGES1	HANDPHALANGES3
ENSMUSG00000023809	349.673	0.780611	0.147025	5.30937	1.10007e-07	2.2753e-06	Rps6ka2	HANDPHALANGES1	HANDPHALANGES3
ENSMUSG00000028936	1524.94	-0.776082	0.146191	-5.30868	1.10424e-07	2.28144e-06	Rpl22	HANDPHALANGES1	HANDPHALANGES3
ENSMUSG00000030209	76.4	-1.81866	0.342793	-5.30541	1.12419e-07	2.31783e-06	Grin2b	HANDPHALANGES1	HANDPHALANGES3
ENSMUSG00000032855	3725.69	0.744712	0.140412	5.30378	1.13432e-07	2.33388e-06	Pkd1	HANDPHALANGES1	HANDPHALANGES3
ENSMUSG00000117924	1571.5	-0.849846	0.160271	-5.30256	1.14188e-07	2.34458e-06	Tmem223	HANDPHALANGES1	HANDPHALANGES3
ENSMUSG00000049336	279.372	-0.877129	0.165469	-5.30086	1.1526e-07	2.36415e-06	Tenm2	HANDPHALANGES1	HANDPHALANGES3
ENSMUSG00000044533	4955.7	-0.79915	0.150767	-5.30058	1.15437e-07	2.36534e-06	Rps2	HANDPHALANGES1	HANDPHALANGES3
ENSMUSG00000045948	324.124	-0.870882	0.164383	-5.29788	1.17153e-07	2.39555e-06	Mrps12	HANDPHALANGES1	HANDPHALANGES3
ENSMUSG00000029470	512.561	-0.689043	0.130089	-5.29672	1.17903e-07	2.40841e-06	P2rx4	HANDPHALANGES1	HANDPHALANGES3
ENSMUSG00000028047	1489.14	0.725103	0.136957	5.29439	1.19414e-07	2.43426e-06	Thbs3	HANDPHALANGES1	HANDPHALANGES3
ENSMUSG00000027395	609.271	0.798276	0.150784	5.29418	1.19552e-07	2.43457e-06	Polr1b	HANDPHALANGES1	HANDPHALANGES3
ENSMUSG00000046561	289.391	1.40286	0.265114	5.29155	1.21284e-07	2.46732e-06	Arsj	HANDPHALANGES1	HANDPHALANGES3
ENSMUSG00000024217	1040.02	-0.850924	0.160874	-5.28938	1.2273e-07	2.49161e-06	Snrpc	HANDPHALANGES1	HANDPHALANGES3
ENSMUSG00000024845	1426.87	-0.698914	0.132164	-5.28825	1.23494e-07	2.50457e-06	Tmem134	HANDPHALANGES1	HANDPHALANGES3
ENSMUSG00000031483	1315.06	0.70836	0.133993	5.28654	1.24654e-07	2.52551e-06	Erlin2	HANDPHALANGES1	HANDPHALANGES3
ENSMUSG00000036315	551.473	-0.923408	0.174692	-5.28593	1.2507e-07	2.53137e-06	Polr1h	HANDPHALANGES1	HANDPHALANGES3
ENSMUSG00000040811	200.054	1.11048	0.21011	5.28521	1.25558e-07	2.53865e-06	Eml2	HANDPHALANGES1	HANDPHALANGES3
ENSMUSG00000032299	737.566	-0.635216	0.120238	-5.28299	1.27094e-07	2.56709e-06	Commd4	HANDPHALANGES1	HANDPHALANGES3
ENSMUSG00000014301	458.38	-1.03641	0.196203	-5.28233	1.27554e-07	2.56855e-06	Pam16	HANDPHALANGES1	HANDPHALANGES3
ENSMUSG00000058070	1198.37	0.596173	0.112857	5.28253	1.2741e-07	2.56855e-06	Eml1	HANDPHALANGES1	HANDPHALANGES3
ENSMUSG00000108353	69.7603	-1.72819	0.327163	-5.28237	1.27524e-07	2.56855e-06	Gm45205	HANDPHALANGES1	HANDPHALANGES3
ENSMUSG00000087352	392.961	-0.744103	0.140884	-5.28169	1.28001e-07	2.57493e-06	Gm12999	HANDPHALANGES1	HANDPHALANGES3
ENSMUSG00000031993	875.359	0.95802	0.181415	5.28083	1.28598e-07	2.58433e-06	Snx19	HANDPHALANGES1	HANDPHALANGES3
ENSMUSG00000024043	1089.59	0.613499	0.116335	5.27354	1.33819e-07	2.68654e-06	Arhgap28	HANDPHALANGES1	HANDPHALANGES3
ENSMUSG00000034192	1184.89	-0.817382	0.155014	-5.27297	1.34235e-07	2.69216e-06	Lsm3	HANDPHALANGES1	HANDPHALANGES3
ENSMUSG00000050708	42159	-0.719842	0.136565	-5.27104	1.35651e-07	2.71781e-06	Ftl1	HANDPHALANGES1	HANDPHALANGES3
ENSMUSG00000024067	1241.7	-0.789008	0.149756	-5.26864	1.37441e-07	2.74812e-06	Dpy30	HANDPHALANGES1	HANDPHALANGES3
ENSMUSG00000014198	103.689	1.43784	0.272974	5.26731	1.38435e-07	2.76522e-06	Zfp385c	HANDPHALANGES1	HANDPHALANGES3
ENSMUSG00000024414	1148.74	-0.800654	0.15202	-5.26675	1.38858e-07	2.77089e-06	Mrpl27	HANDPHALANGES1	HANDPHALANGES3
ENSMUSG00000017716	1852.53	-0.636894	0.120997	-5.26374	1.41156e-07	2.81391e-06	Birc5	HANDPHALANGES1	HANDPHALANGES3
ENSMUSG00000009549	2309.79	-0.720837	0.136999	-5.26161	1.42796e-07	2.84374e-06	Srp14	HANDPHALANGES1	HANDPHALANGES3
ENSMUSG00000000088	1305.83	-0.808364	0.153752	-5.25757	1.45972e-07	2.90179e-06	Cox5a	HANDPHALANGES1	HANDPHALANGES3
ENSMUSG00000040212	2656.23	-0.690452	0.131326	-5.25753	1.46003e-07	2.90179e-06	Emp3	HANDPHALANGES1	HANDPHALANGES3
ENSMUSG00000038533	1111.52	0.633273	0.120486	5.25599	1.47229e-07	2.92323e-06	Cbfa2t2	HANDPHALANGES1	HANDPHALANGES3
ENSMUSG00000044991	225.329	-0.863368	0.164362	-5.25284	1.4977e-07	2.97061e-06	Shld1	HANDPHALANGES1	HANDPHALANGES3
ENSMUSG00000120512	49.2648	2.2965	0.437255	5.25209	1.50384e-07	2.97694e-06	5730409N16Rik	HANDPHALANGES1	HANDPHALANGES3
ENSMUSG00000018858	764.761	-0.844104	0.160867	-5.24721	1.54424e-07	3.05387e-06	Mrpl58	HANDPHALANGES1	HANDPHALANGES3
ENSMUSG00000032601	938.457	0.750546	0.143185	5.2418	1.59017e-07	3.14157e-06	Prkar2a	HANDPHALANGES1	HANDPHALANGES3
ENSMUSG00000110246	48.9006	1.95789	0.373621	5.2403	1.60312e-07	3.16091e-06	C130073E24Rik	HANDPHALANGES1	HANDPHALANGES3
ENSMUSG00000048304	23.1256	5.3066	1.01306	5.23819	1.62157e-07	3.19407e-06	Slitrk3	HANDPHALANGES1	HANDPHALANGES3
ENSMUSG00000028062	1081.36	-0.753481	0.143974	-5.23347	1.66358e-07	3.27217e-06	Lamtor2	HANDPHALANGES1	HANDPHALANGES3
ENSMUSG00000040855	103.05	1.90674	0.364342	5.23337	1.66451e-07	3.27217e-06	Reps2	HANDPHALANGES1	HANDPHALANGES3
ENSMUSG00000036270	2007.51	0.646808	0.123609	5.23267	1.67077e-07	3.28122e-06	Edc4	HANDPHALANGES1	HANDPHALANGES3
ENSMUSG00000061411	351.427	1.19431	0.228261	5.23223	1.67482e-07	3.28592e-06	Nol4l	HANDPHALANGES1	HANDPHALANGES3
ENSMUSG00000058833	891.668	-0.849197	0.162366	-5.23014	1.69381e-07	3.3199e-06	Rex1bd	HANDPHALANGES1	HANDPHALANGES3
ENSMUSG00000019256	466.718	1.18229	0.226076	5.22961	1.69868e-07	3.32616e-06	Ahr	HANDPHALANGES1	HANDPHALANGES3
ENSMUSG00000004096	1425.22	-0.715958	0.136921	-5.22897	1.70459e-07	3.33446e-06	Cwc15	HANDPHALANGES1	HANDPHALANGES3
ENSMUSG00000039960	734.109	-0.63834	0.122118	-5.22725	1.72049e-07	3.36223e-06	Rhou	HANDPHALANGES1	HANDPHALANGES3
ENSMUSG00000084349	3980.03	-0.584754	0.111871	-5.22705	1.72234e-07	3.36255e-06	Rpl3-ps1	HANDPHALANGES1	HANDPHALANGES3
ENSMUSG00000050732	2097.61	-0.628412	0.120264	-5.22527	1.73901e-07	3.38842e-06	Vamp8	HANDPHALANGES1	HANDPHALANGES3
ENSMUSG00000046432	4499.18	-0.690628	0.132233	-5.22282	1.76218e-07	3.42684e-06	Bex3	HANDPHALANGES1	HANDPHALANGES3
ENSMUSG00000024590	865.537	1.12746	0.215934	5.22132	1.77651e-07	3.45133e-06	Lmnb1	HANDPHALANGES1	HANDPHALANGES3
ENSMUSG00000025489	83.8359	1.65892	0.317793	5.22011	1.78817e-07	3.47058e-06	Ifitm5	HANDPHALANGES1	HANDPHALANGES3
ENSMUSG00000070858	342.69	-1.23826	0.237268	-5.21882	1.8007e-07	3.49149e-06	Nicol1	HANDPHALANGES1	HANDPHALANGES3
ENSMUSG00000020097	3913.6	0.7789	0.149285	5.21752	1.81336e-07	3.5126e-06	Sgpl1	HANDPHALANGES1	HANDPHALANGES3
ENSMUSG00000002307	740.804	0.720525	0.138132	5.21618	1.82646e-07	3.53454e-06	Daxx	HANDPHALANGES1	HANDPHALANGES3
ENSMUSG00000041879	3428.19	0.670739	0.128718	5.21091	1.87914e-07	3.62694e-06	Ipo9	HANDPHALANGES1	HANDPHALANGES3
ENSMUSG00000079215	1686.8	0.609514	0.11697	5.21086	1.87969e-07	3.62694e-06	Zfp664	HANDPHALANGES1	HANDPHALANGES3
ENSMUSG00000002345	331.349	-0.887611	0.170407	-5.20876	1.90109e-07	3.66468e-06	Borcs8	HANDPHALANGES1	HANDPHALANGES3
ENSMUSG00000041674	446.725	-0.955379	0.183474	-5.20717	1.91741e-07	3.69255e-06	BC006965	HANDPHALANGES1	HANDPHALANGES3
ENSMUSG00000000794	99.875	1.32169	0.253889	5.20577	1.93194e-07	3.71693e-06	Kcnn3	HANDPHALANGES1	HANDPHALANGES3
ENSMUSG00000028798	2698.35	-0.603293	0.11591	-5.20484	1.94165e-07	3.73199e-06	Eif3i	HANDPHALANGES1	HANDPHALANGES3
ENSMUSG00000045005	61.0316	-1.62671	0.312604	-5.20376	1.95296e-07	3.75009e-06	Fzd5	HANDPHALANGES1	HANDPHALANGES3
ENSMUSG00000026112	1615.83	0.601599	0.115654	5.20171	1.97461e-07	3.78801e-06	Coa5	HANDPHALANGES1	HANDPHALANGES3
ENSMUSG00000036168	180.087	-1.30817	0.251804	-5.19518	2.04521e-07	3.91966e-06	Ccdc38	HANDPHALANGES1	HANDPHALANGES3
ENSMUSG00000044548	1312.45	0.663394	0.127699	5.19497	2.04755e-07	3.92037e-06	Dact1	HANDPHALANGES1	HANDPHALANGES3
ENSMUSG00000061518	1708.43	-0.873685	0.168214	-5.19389	2.05942e-07	3.93928e-06	Cox5b	HANDPHALANGES1	HANDPHALANGES3
ENSMUSG00000064343	90.2955	-1.91494	0.368756	-5.19298	2.06958e-07	3.95491e-06	mt-Tq	HANDPHALANGES1	HANDPHALANGES3
ENSMUSG00000062054	562.149	-0.702321	0.135372	-5.18808	2.12477e-07	4.05258e-06	Iah1	HANDPHALANGES1	HANDPHALANGES3
ENSMUSG00000038871	1814.45	-0.914522	0.176287	-5.18769	2.12913e-07	4.057e-06	Bpgm	HANDPHALANGES1	HANDPHALANGES3
ENSMUSG00000027566	4607.69	-0.618934	0.119318	-5.18725	2.13421e-07	4.06278e-06	Psma7	HANDPHALANGES1	HANDPHALANGES3
ENSMUSG00000032571	795.88	0.706909	0.136554	5.17676	2.25768e-07	4.2896e-06	Pik3r4	HANDPHALANGES1	HANDPHALANGES3
ENSMUSG00000020219	1527.73	-0.909259	0.175841	-5.1709	2.32963e-07	4.41785e-06	Timm13	HANDPHALANGES1	HANDPHALANGES3
ENSMUSG00000048232	737.832	0.746647	0.144429	5.16965	2.34538e-07	4.44347e-06	Fbxo10	HANDPHALANGES1	HANDPHALANGES3
ENSMUSG00000022949	78.0058	2.35001	0.455045	5.16434	2.41292e-07	4.56222e-06	Clic6	HANDPHALANGES1	HANDPHALANGES3
ENSMUSG00000033161	1121.02	-0.636978	0.123358	-5.16363	2.42205e-07	4.57128e-06	Atp1a1	HANDPHALANGES1	HANDPHALANGES3
ENSMUSG00000030339	866.31	-0.581736	0.11267	-5.1632	2.42765e-07	4.57748e-06	Ltbr	HANDPHALANGES1	HANDPHALANGES3
ENSMUSG00000058325	1207.01	0.608898	0.117947	5.16247	2.43711e-07	4.59096e-06	Dock1	HANDPHALANGES1	HANDPHALANGES3
ENSMUSG00000084416	181.9	-1.2305	0.238377	-5.16197	2.44364e-07	4.59891e-06	Rpl10a-ps1	HANDPHALANGES1	HANDPHALANGES3
ENSMUSG00000001134	270.819	-0.931996	0.180594	-5.16072	2.46008e-07	4.61672e-06	Uxt	HANDPHALANGES1	HANDPHALANGES3
ENSMUSG00000058558	5595.12	-0.785977	0.152293	-5.16094	2.45707e-07	4.61672e-06	Rpl5	HANDPHALANGES1	HANDPHALANGES3
ENSMUSG00000078851	734.755	-0.758153	0.146905	-5.16083	2.4586e-07	4.61672e-06	H2ac25	HANDPHALANGES1	HANDPHALANGES3
ENSMUSG00000019689	342.552	-1.13829	0.220686	-5.15795	2.49668e-07	4.68097e-06	Fmc1	HANDPHALANGES1	HANDPHALANGES3
ENSMUSG00000023249	96.341	1.28007	0.248317	5.155	2.53637e-07	4.74539e-06	Parp3	HANDPHALANGES1	HANDPHALANGES3
ENSMUSG00000036450	1310.27	0.701297	0.136195	5.14922	2.61569e-07	4.88107e-06	Hif1an	HANDPHALANGES1	HANDPHALANGES3
ENSMUSG00000073802	78.7891	-2.02595	0.393717	-5.14571	2.66516e-07	4.96871e-06	Cdkn2b	HANDPHALANGES1	HANDPHALANGES3
ENSMUSG00000031897	196.923	-1.09703	0.213204	-5.14546	2.66864e-07	4.97054e-06	Psmb10	HANDPHALANGES1	HANDPHALANGES3
ENSMUSG00000061104	689.461	-0.766449	0.148989	-5.14434	2.68466e-07	4.99101e-06	Sap18b	HANDPHALANGES1	HANDPHALANGES3
ENSMUSG00000103851	118.711	-1.27232	0.247317	-5.1445	2.68238e-07	4.99101e-06	Gm37606	HANDPHALANGES1	HANDPHALANGES3
ENSMUSG00000030188	253.589	-0.999308	0.194325	-5.14245	2.71186e-07	5.03685e-06	Magohb	HANDPHALANGES1	HANDPHALANGES3
ENSMUSG00000062933	699.548	-1.02461	0.199284	-5.14147	2.72598e-07	5.05835e-06	Gm10123	HANDPHALANGES1	HANDPHALANGES3
ENSMUSG00000028044	2907.76	-0.614635	0.119676	-5.13583	2.80895e-07	5.20745e-06	Cks1b	HANDPHALANGES1	HANDPHALANGES3
ENSMUSG00000002565	1556.1	0.811534	0.158219	5.12919	2.9099e-07	5.38955e-06	Scin	HANDPHALANGES1	HANDPHALANGES3
ENSMUSG00000028070	2063.98	-0.616963	0.120306	-5.12828	2.92401e-07	5.41064e-06	Naxe	HANDPHALANGES1	HANDPHALANGES3
ENSMUSG00000038530	57.5945	2.73439	0.533762	5.12287	3.00921e-07	5.56312e-06	Rgs4	HANDPHALANGES1	HANDPHALANGES3
ENSMUSG00000032239	1056.12	-0.631774	0.123363	-5.12127	3.03481e-07	5.60522e-06	Rp9	HANDPHALANGES1	HANDPHALANGES3
ENSMUSG00000004032	2518.6	-0.758926	0.148348	-5.11586	3.12318e-07	5.76309e-06	Gstm5	HANDPHALANGES1	HANDPHALANGES3
ENSMUSG00000038489	697.444	-0.939579	0.183763	-5.11299	3.17094e-07	5.84578e-06	Polr2l	HANDPHALANGES1	HANDPHALANGES3
ENSMUSG00000027583	185.863	1.72248	0.336987	5.11144	3.1972e-07	5.88873e-06	Zbtb46	HANDPHALANGES1	HANDPHALANGES3
ENSMUSG00000038173	60.368	-2.82318	0.552637	-5.10856	3.24625e-07	5.968e-06	Enpp6	HANDPHALANGES1	HANDPHALANGES3
ENSMUSG00000069682	161.529	-1.51667	0.296989	-5.10683	3.27603e-07	6.01717e-06	Gm10275	HANDPHALANGES1	HANDPHALANGES3
ENSMUSG00000014504	1892.15	-0.584824	0.114525	-5.10653	3.28137e-07	6.0214e-06	Srp19	HANDPHALANGES1	HANDPHALANGES3
ENSMUSG00000037624	113.86	1.55552	0.304669	5.10562	3.29716e-07	6.0448e-06	Kcnk2	HANDPHALANGES1	HANDPHALANGES3
ENSMUSG00000022483	56720.6	0.682377	0.133699	5.10384	3.32824e-07	6.09614e-06	Col2a1	HANDPHALANGES1	HANDPHALANGES3
ENSMUSG00000070283	517.166	-0.850856	0.166746	-5.10272	3.348e-07	6.12393e-06	Ndufaf3	HANDPHALANGES1	HANDPHALANGES3
ENSMUSG00000074457	1207.76	-1.16429	0.22825	-5.10096	3.37937e-07	6.16705e-06	S100a16	HANDPHALANGES1	HANDPHALANGES3
ENSMUSG00000047731	1793.83	0.752418	0.147563	5.09895	3.41543e-07	6.22712e-06	Wbp1l	HANDPHALANGES1	HANDPHALANGES3
ENSMUSG00000022193	2311.61	-0.608017	0.119262	-5.09816	3.42965e-07	6.24732e-06	Psmb5	HANDPHALANGES1	HANDPHALANGES3
ENSMUSG00000049281	70.0251	2.33466	0.458153	5.09582	3.47239e-07	6.31358e-06	Scn3b	HANDPHALANGES1	HANDPHALANGES3
ENSMUSG00000068522	64.213	1.53949	0.302165	5.09488	3.48971e-07	6.33927e-06	Aard	HANDPHALANGES1	HANDPHALANGES3
ENSMUSG00000033916	1625.29	-0.735098	0.14433	-5.09318	3.52102e-07	6.3903e-06	Chmp2a	HANDPHALANGES1	HANDPHALANGES3
ENSMUSG00000086859	722.15	-0.629506	0.123612	-5.09261	3.53173e-07	6.40388e-06	Snhg20	HANDPHALANGES1	HANDPHALANGES3
ENSMUSG00000026676	487.476	1.36378	0.267824	5.09208	3.54151e-07	6.41279e-06	Ccdc3	HANDPHALANGES1	HANDPHALANGES3
ENSMUSG00000097022	42.7531	-1.95075	0.383101	-5.092	3.5431e-07	6.41279e-06	BC001981	HANDPHALANGES1	HANDPHALANGES3
ENSMUSG00000020697	1553.88	0.596546	0.117199	5.09003	3.5801e-07	6.47386e-06	Lig3	HANDPHALANGES1	HANDPHALANGES3
ENSMUSG00000034908	2438.3	0.615314	0.120954	5.08719	3.63411e-07	6.56555e-06	Sidt2	HANDPHALANGES1	HANDPHALANGES3
ENSMUSG00000045414	3436.28	0.766912	0.150784	5.08616	3.6539e-07	6.5893e-06	Dipk2a	HANDPHALANGES1	HANDPHALANGES3
ENSMUSG00000074211	546.502	-0.763029	0.150045	-5.08533	3.66988e-07	6.61212e-06	Sdhaf1	HANDPHALANGES1	HANDPHALANGES3
ENSMUSG00000005161	12380.5	-0.693255	0.136337	-5.08484	3.6793e-07	6.62308e-06	Prdx2	HANDPHALANGES1	HANDPHALANGES3
ENSMUSG00000029661	47112	0.609535	0.119922	5.08274	3.72028e-07	6.69077e-06	Col1a2	HANDPHALANGES1	HANDPHALANGES3
ENSMUSG00000020741	603.908	0.701122	0.137958	5.08214	3.73209e-07	6.70594e-06	Cluh	HANDPHALANGES1	HANDPHALANGES3
ENSMUSG00000021456	47.6258	2.46869	0.485804	5.08165	3.74163e-07	6.717e-06	Fbp2	HANDPHALANGES1	HANDPHALANGES3
ENSMUSG00000033940	2500.18	-0.65486	0.128882	-5.08107	3.75322e-07	6.73173e-06	Brk1	HANDPHALANGES1	HANDPHALANGES3
ENSMUSG00000060288	528.703	-0.741131	0.145913	-5.07927	3.78896e-07	6.78969e-06	Ppih	HANDPHALANGES1	HANDPHALANGES3
ENSMUSG00000028749	145.854	-2.5009	0.492407	-5.07893	3.79557e-07	6.79541e-06	Pla2g2f	HANDPHALANGES1	HANDPHALANGES3
ENSMUSG00000027944	1526.51	-0.616326	0.121397	-5.07696	3.83522e-07	6.86021e-06	Hax1	HANDPHALANGES1	HANDPHALANGES3
ENSMUSG00000037499	853.843	-0.867896	0.171005	-5.07528	3.86921e-07	6.91478e-06	Nenf	HANDPHALANGES1	HANDPHALANGES3
ENSMUSG00000024501	1094.44	0.765737	0.150921	5.07377	3.90014e-07	6.96378e-06	Dpysl3	HANDPHALANGES1	HANDPHALANGES3
ENSMUSG00000041084	4865.9	-0.610278	0.120293	-5.07326	3.9106e-07	6.97619e-06	Ostc	HANDPHALANGES1	HANDPHALANGES3
ENSMUSG00000024258	1585.67	-0.700069	0.138067	-5.07049	3.96802e-07	7.07227e-06	Polr2d	HANDPHALANGES1	HANDPHALANGES3
ENSMUSG00000020372	6675.8	-0.757532	0.149453	-5.0687	4.00542e-07	7.13253e-06	Rack1	HANDPHALANGES1	HANDPHALANGES3
ENSMUSG00000039431	160.876	1.35956	0.268282	5.06765	4.02758e-07	7.16556e-06	Mtmr7	HANDPHALANGES1	HANDPHALANGES3
ENSMUSG00000006057	2629.68	-0.803423	0.158587	-5.06613	4.05979e-07	7.2164e-06	Atp5mc1	HANDPHALANGES1	HANDPHALANGES3
ENSMUSG00000048878	349.198	-0.864382	0.170631	-5.0658	4.06694e-07	7.22264e-06	Hexim1	HANDPHALANGES1	HANDPHALANGES3
ENSMUSG00000032013	633.546	-3.95891	0.781784	-5.06394	4.10678e-07	7.28037e-06	Trim29	HANDPHALANGES1	HANDPHALANGES3
ENSMUSG00000015672	972.573	-0.674198	0.133211	-5.06112	4.16802e-07	7.37575e-06	Mrpl32	HANDPHALANGES1	HANDPHALANGES3
ENSMUSG00000020589	306.35	0.919262	0.18165	5.06061	4.17912e-07	7.38882e-06	Cyria	HANDPHALANGES1	HANDPHALANGES3
ENSMUSG00000024248	1200.02	-0.812332	0.16053	-5.06033	4.18534e-07	7.39323e-06	Cox7a2l	HANDPHALANGES1	HANDPHALANGES3
ENSMUSG00000039771	1104.06	-0.900935	0.178075	-5.05929	4.20813e-07	7.4137e-06	Polr2j	HANDPHALANGES1	HANDPHALANGES3
ENSMUSG00000100755	220.386	-1.32838	0.26256	-5.05935	4.20684e-07	7.4137e-06	Rps23-ps1	HANDPHALANGES1	HANDPHALANGES3
ENSMUSG00000026414	15.9114	-4.41767	0.873508	-5.05739	4.25044e-07	7.4816e-06	Tnnt2	HANDPHALANGES1	HANDPHALANGES3
ENSMUSG00000080921	62.6515	-1.81037	0.358081	-5.05577	4.28661e-07	7.53859e-06	Rpl38-ps2	HANDPHALANGES1	HANDPHALANGES3
ENSMUSG00000025825	1096	-0.63772	0.126192	-5.05356	4.33649e-07	7.61956e-06	Iscu	HANDPHALANGES1	HANDPHALANGES3
ENSMUSG00000028226	956.8	0.829001	0.164081	5.05238	4.36344e-07	7.65337e-06	Mmp16	HANDPHALANGES1	HANDPHALANGES3
ENSMUSG00000028430	886.761	0.663667	0.131392	5.05104	4.39413e-07	7.7004e-06	Nol6	HANDPHALANGES1	HANDPHALANGES3
ENSMUSG00000025153	1836.3	0.729148	0.144411	5.04911	4.43878e-07	7.77178e-06	Fasn	HANDPHALANGES1	HANDPHALANGES3
ENSMUSG00000057506	764.037	-0.744782	0.147593	-5.0462	4.50687e-07	7.87711e-06	Bloc1s2	HANDPHALANGES1	HANDPHALANGES3
ENSMUSG00000003824	394.527	-0.934537	0.185306	-5.04321	4.57797e-07	7.98731e-06	Syce2	HANDPHALANGES1	HANDPHALANGES3
ENSMUSG00000084957	723.134	-0.625625	0.124051	-5.04329	4.57591e-07	7.98731e-06	Bbip1	HANDPHALANGES1	HANDPHALANGES3
ENSMUSG00000041075	818.965	0.618375	0.122677	5.04067	4.63898e-07	8.08665e-06	Fzd7	HANDPHALANGES1	HANDPHALANGES3
ENSMUSG00000018770	4775.12	-0.629598	0.125075	-5.03377	4.80923e-07	8.37608e-06	Atp5mc3	HANDPHALANGES1	HANDPHALANGES3
ENSMUSG00000063239	151.489	-1.78559	0.354795	-5.03275	4.83491e-07	8.41342e-06	Grm4	HANDPHALANGES1	HANDPHALANGES3
ENSMUSG00000093904	2945.92	-0.695788	0.138259	-5.03249	4.84147e-07	8.41747e-06	Tomm20	HANDPHALANGES1	HANDPHALANGES3
ENSMUSG00000038607	2151.82	-0.702068	0.139588	-5.02956	4.91595e-07	8.532e-06	Gng10	HANDPHALANGES1	HANDPHALANGES3
ENSMUSG00000026725	1001.72	0.862859	0.171649	5.02689	4.98497e-07	8.64425e-06	Tnn	HANDPHALANGES1	HANDPHALANGES3
ENSMUSG00000045284	346.327	1.05967	0.210855	5.02559	5.01875e-07	8.68011e-06	Dcaf12l1	HANDPHALANGES1	HANDPHALANGES3
ENSMUSG00000095098	548.004	-0.899435	0.178971	-5.02559	5.01877e-07	8.68011e-06	Ccdc85b	HANDPHALANGES1	HANDPHALANGES3
ENSMUSG00000021807	2254.53	-0.706162	0.140518	-5.02542	5.02332e-07	8.68042e-06	Rtraf	HANDPHALANGES1	HANDPHALANGES3
ENSMUSG00000015127	387.582	0.912586	0.181601	5.02522	5.02844e-07	8.68172e-06	Unkl	HANDPHALANGES1	HANDPHALANGES3
ENSMUSG00000035206	1407.84	0.629057	0.125211	5.02396	5.06173e-07	8.73159e-06	Sppl2b	HANDPHALANGES1	HANDPHALANGES3
ENSMUSG00000002580	426.262	-0.932182	0.185568	-5.0234	5.07652e-07	8.7495e-06	Mien1	HANDPHALANGES1	HANDPHALANGES3
ENSMUSG00000051319	179.572	-1.27043	0.253016	-5.02114	5.1365e-07	8.8452e-06	Mtln	HANDPHALANGES1	HANDPHALANGES3
ENSMUSG00000016833	771.671	-0.860629	0.171459	-5.01945	5.1819e-07	8.91565e-06	Mrps18c	HANDPHALANGES1	HANDPHALANGES3
ENSMUSG00000034949	417.244	0.633719	0.126301	5.01752	5.23423e-07	8.99011e-06	Zfr2	HANDPHALANGES1	HANDPHALANGES3
ENSMUSG00000002768	1574.61	-0.668391	0.133236	-5.01661	5.25916e-07	9.02512e-06	Mea1	HANDPHALANGES1	HANDPHALANGES3
ENSMUSG00000021375	657.656	0.661703	0.131915	5.01612	5.27256e-07	9.0403e-06	Kif13a	HANDPHALANGES1	HANDPHALANGES3
ENSMUSG00000104486	100.199	-1.40008	0.279154	-5.01545	5.29084e-07	9.06381e-06	Gm38066	HANDPHALANGES1	HANDPHALANGES3
ENSMUSG00000015776	2013.54	0.685716	0.136762	5.01395	5.3324e-07	9.11927e-06	Med22	HANDPHALANGES1	HANDPHALANGES3
ENSMUSG00000079357	312.42	-0.852109	0.169997	-5.0125	5.37261e-07	9.16437e-06	Gm11100	HANDPHALANGES1	HANDPHALANGES3
ENSMUSG00000079487	659.116	0.747155	0.149131	5.01006	5.44121e-07	9.27342e-06	Med12	HANDPHALANGES1	HANDPHALANGES3
ENSMUSG00000047205	253.307	1.27829	0.255243	5.00815	5.49546e-07	9.35784e-06	Dusp18	HANDPHALANGES1	HANDPHALANGES3
ENSMUSG00000062963	961.746	-0.792456	0.158295	-5.00621	5.55124e-07	9.43662e-06	Ufc1	HANDPHALANGES1	HANDPHALANGES3
ENSMUSG00000031839	3993.18	-0.648531	0.129621	-5.00328	5.63633e-07	9.5649e-06	Hsbp1	HANDPHALANGES1	HANDPHALANGES3
ENSMUSG00000005034	2286.24	0.644247	0.128889	4.99845	5.77917e-07	9.78221e-06	Prkacb	HANDPHALANGES1	HANDPHALANGES3
ENSMUSG00000040794	356.708	-0.962721	0.192651	-4.99723	5.81585e-07	9.83591e-06	C1qtnf4	HANDPHALANGES1	HANDPHALANGES3
ENSMUSG00000043384	2489.63	0.747706	0.149651	4.99635	5.8427e-07	9.87292e-06	Gprasp1	HANDPHALANGES1	HANDPHALANGES3
ENSMUSG00000020917	3829.53	0.626824	0.125494	4.99485	5.88803e-07	9.93262e-06	Acly	HANDPHALANGES1	HANDPHALANGES3
ENSMUSG00000053825	31.7882	2.29006	0.458507	4.9946	5.89566e-07	9.93704e-06	Ppfia2	HANDPHALANGES1	HANDPHALANGES3
ENSMUSG00000093989	748.818	-0.723155	0.144794	-4.99436	5.903e-07	9.94098e-06	Rnasek	HANDPHALANGES1	HANDPHALANGES3
ENSMUSG00000031434	459.921	0.736089	0.147389	4.9942	5.90815e-07	9.94121e-06	Morc4	HANDPHALANGES1	HANDPHALANGES3
ENSMUSG00000054874	853.176	0.625778	0.125309	4.99387	5.91806e-07	9.94945e-06	Pcnx3	HANDPHALANGES1	HANDPHALANGES3
ENSMUSG00000097836	520.509	-0.758322	0.151921	-4.99154	5.98998e-07	1.00618e-05	Gm26903	HANDPHALANGES1	HANDPHALANGES3
ENSMUSG00000074971	8308.14	-0.682115	0.136697	-4.98999	6.03818e-07	1.01342e-05	Fibin	HANDPHALANGES1	HANDPHALANGES3
ENSMUSG00000102918	1693.84	0.915193	0.183444	4.98896	6.07049e-07	1.01799e-05	Pcdhgc3	HANDPHALANGES1	HANDPHALANGES3
ENSMUSG00000037503	2727.64	0.639402	0.128266	4.98496	6.19739e-07	1.03839e-05	Fam168b	HANDPHALANGES1	HANDPHALANGES3
ENSMUSG00000030887	133.112	-1.14806	0.230333	-4.98437	6.21635e-07	1.03981e-05	Pdzd9	HANDPHALANGES1	HANDPHALANGES3
ENSMUSG00000052911	2394.36	1.00108	0.200923	4.98238	6.28058e-07	1.04967e-05	Lamb2	HANDPHALANGES1	HANDPHALANGES3
ENSMUSG00000050914	272.477	-0.942448	0.189262	-4.9796	6.37159e-07	1.06399e-05	Ankrd37	HANDPHALANGES1	HANDPHALANGES3
ENSMUSG00000031224	256.844	0.899259	0.180611	4.97899	6.39184e-07	1.06647e-05	Magee2	HANDPHALANGES1	HANDPHALANGES3
ENSMUSG00000003469	35.2478	-2.1596	0.433765	-4.97874	6.40005e-07	1.06694e-05	Phyhip	HANDPHALANGES1	HANDPHALANGES3
ENSMUSG00000037119	1908.79	0.646451	0.129977	4.97359	6.57245e-07	1.09477e-05	Fam91a1	HANDPHALANGES1	HANDPHALANGES3
ENSMUSG00000080893	221.499	-1.08669	0.218565	-4.97191	6.62961e-07	1.10336e-05	Ndufa12-ps	HANDPHALANGES1	HANDPHALANGES3
ENSMUSG00000025204	3958.31	-0.741535	0.149168	-4.97113	6.65633e-07	1.10688e-05	Ndufb8	HANDPHALANGES1	HANDPHALANGES3
ENSMUSG00000020681	108.48	1.42415	0.286525	4.97041	6.68111e-07	1.11007e-05	Ace	HANDPHALANGES1	HANDPHALANGES3
ENSMUSG00000041560	2144.03	-0.617691	0.124295	-4.96956	6.71051e-07	1.11309e-05	Nop53	HANDPHALANGES1	HANDPHALANGES3
ENSMUSG00000042605	1752.3	0.692028	0.139318	4.96725	6.7909e-07	1.12549e-05	Atxn2	HANDPHALANGES1	HANDPHALANGES3
ENSMUSG00000057036	148.728	-1.52149	0.306334	-4.96677	6.80778e-07	1.12734e-05	Gm7536	HANDPHALANGES1	HANDPHALANGES3
ENSMUSG00000005982	1486.09	0.581065	0.117005	4.96614	6.82978e-07	1.13004e-05	Naa60	HANDPHALANGES1	HANDPHALANGES3
ENSMUSG00000060671	2153.16	0.652314	0.13148	4.96131	7.00177e-07	1.15754e-05	Atp8b2	HANDPHALANGES1	HANDPHALANGES3
ENSMUSG00000041119	952.166	0.611327	0.123285	4.95867	7.09785e-07	1.17244e-05	Pde9a	HANDPHALANGES1	HANDPHALANGES3
ENSMUSG00000024194	920.846	-0.696184	0.140404	-4.95844	7.10629e-07	1.17286e-05	Cuta	HANDPHALANGES1	HANDPHALANGES3
ENSMUSG00000031119	1946.95	0.661411	0.133423	4.95726	7.14949e-07	1.1753e-05	Gpc4	HANDPHALANGES1	HANDPHALANGES3
ENSMUSG00000045515	120.447	-1.37476	0.277324	-4.95723	7.15067e-07	1.1753e-05	Pou3f3	HANDPHALANGES1	HANDPHALANGES3
ENSMUSG00000057716	21.4219	3.71672	0.749737	4.95736	7.14569e-07	1.1753e-05	Tmem178b	HANDPHALANGES1	HANDPHALANGES3
ENSMUSG00000120888	14.4432	5.49361	1.10809	4.95772	7.13245e-07	1.1753e-05	Gm11538	HANDPHALANGES1	HANDPHALANGES3
ENSMUSG00000040891	502.575	-0.800686	0.161571	-4.95564	7.20926e-07	1.18395e-05	Foxa3	HANDPHALANGES1	HANDPHALANGES3
ENSMUSG00000035242	13598.5	-0.618348	0.124861	-4.95228	7.33502e-07	1.20162e-05	Oaz1	HANDPHALANGES1	HANDPHALANGES3
ENSMUSG00000016344	1773.32	-0.736641	0.148828	-4.94961	7.43605e-07	1.21517e-05	Ppdpf	HANDPHALANGES1	HANDPHALANGES3
ENSMUSG00000003038	13814.6	-0.611201	0.123588	-4.94547	7.59605e-07	1.24029e-05	Hmgn2	HANDPHALANGES1	HANDPHALANGES3
ENSMUSG00000036103	3521.18	0.585873	0.118516	4.94341	7.67697e-07	1.25248e-05	Colec12	HANDPHALANGES1	HANDPHALANGES3
ENSMUSG00000054252	4200.13	0.670679	0.135722	4.94155	7.75033e-07	1.26341e-05	Fgfr3	HANDPHALANGES1	HANDPHALANGES3
ENSMUSG00000053175	62.6113	1.46907	0.297343	4.94067	7.78552e-07	1.2681e-05	Bcl3	HANDPHALANGES1	HANDPHALANGES3
ENSMUSG00000104222	837.491	1.09515	0.221726	4.93921	7.84407e-07	1.27659e-05	Gm7292	HANDPHALANGES1	HANDPHALANGES3
ENSMUSG00000022494	39.9934	3.13155	0.634058	4.9389	7.85662e-07	1.27758e-05	Shisa9	HANDPHALANGES1	HANDPHALANGES3
ENSMUSG00000073514	29.6067	3.16027	0.640287	4.93571	7.98603e-07	1.29651e-05	Dok6	HANDPHALANGES1	HANDPHALANGES3
ENSMUSG00000015671	4303.39	-0.583276	0.118192	-4.935	8.01499e-07	1.30014e-05	Psma2	HANDPHALANGES1	HANDPHALANGES3
ENSMUSG00000030126	3033.17	-0.687914	0.13944	-4.93339	8.08138e-07	1.30984e-05	Tmcc1	HANDPHALANGES1	HANDPHALANGES3
ENSMUSG00000095677	2238.21	-0.587425	0.119156	-4.9299	8.22719e-07	1.33239e-05	Dynlt1f	HANDPHALANGES1	HANDPHALANGES3
ENSMUSG00000097767	148.676	1.36916	0.277762	4.92925	8.25444e-07	1.33571e-05	Miat	HANDPHALANGES1	HANDPHALANGES3
ENSMUSG00000042129	137.341	1.54978	0.314534	4.92723	8.34034e-07	1.34851e-05	Rassf4	HANDPHALANGES1	HANDPHALANGES3
ENSMUSG00000106826	326.251	0.734873	0.149153	4.92697	8.35125e-07	1.34918e-05	Gm42583	HANDPHALANGES1	HANDPHALANGES3
ENSMUSG00000036513	960.593	-0.603219	0.122477	-4.92515	8.42944e-07	1.3607e-05	Commd2	HANDPHALANGES1	HANDPHALANGES3
ENSMUSG00000051674	819.123	0.758493	0.154088	4.92248	8.54558e-07	1.37833e-05	Dcun1d4	HANDPHALANGES1	HANDPHALANGES3
ENSMUSG00000031848	1159.97	-0.79802	0.162185	-4.92043	8.63533e-07	1.38942e-05	Lsm4	HANDPHALANGES1	HANDPHALANGES3
ENSMUSG00000047992	83.0988	-1.35624	0.275632	-4.92046	8.63406e-07	1.38942e-05	Dipk1c	HANDPHALANGES1	HANDPHALANGES3
ENSMUSG00000090386	1152.87	-0.685495	0.13931	-4.92065	8.62563e-07	1.38942e-05	Mir99ahg	HANDPHALANGES1	HANDPHALANGES3
ENSMUSG00000071662	1488.21	-0.635014	0.129185	-4.91556	8.85312e-07	1.42216e-05	Polr2g	HANDPHALANGES1	HANDPHALANGES3
ENSMUSG00000006676	2335.23	0.593704	0.120806	4.91454	8.89919e-07	1.42725e-05	Usp19	HANDPHALANGES1	HANDPHALANGES3
ENSMUSG00000024309	711.275	-0.909444	0.185051	-4.91454	8.89889e-07	1.42725e-05	Pfdn6	HANDPHALANGES1	HANDPHALANGES3
ENSMUSG00000039501	332.544	0.721628	0.146926	4.91149	9.03871e-07	1.44729e-05	Znfx1	HANDPHALANGES1	HANDPHALANGES3
ENSMUSG00000057880	1064.72	0.777099	0.158244	4.91078	9.07169e-07	1.4514e-05	Abat	HANDPHALANGES1	HANDPHALANGES3
ENSMUSG00000040048	1448.74	-0.770096	0.156833	-4.91029	9.0941e-07	1.45381e-05	Ndufb10	HANDPHALANGES1	HANDPHALANGES3
ENSMUSG00000079480	356.236	-0.962019	0.195936	-4.90985	9.11441e-07	1.45589e-05	Pin4	HANDPHALANGES1	HANDPHALANGES3
ENSMUSG00000085525	69.8731	-1.53218	0.312151	-4.90845	9.17983e-07	1.46516e-05	Gm13166	HANDPHALANGES1	HANDPHALANGES3
ENSMUSG00000032289	2963.1	0.901729	0.183752	4.90731	9.23359e-07	1.47137e-05	Thsd4	HANDPHALANGES1	HANDPHALANGES3
ENSMUSG00000034110	293.55	0.9316	0.189834	4.90744	9.22715e-07	1.47137e-05	Kctd7	HANDPHALANGES1	HANDPHALANGES3
ENSMUSG00000024902	755.492	-0.842179	0.17163	-4.90693	9.25129e-07	1.47301e-05	Mrpl11	HANDPHALANGES1	HANDPHALANGES3
ENSMUSG00000071076	2041.6	-0.777409	0.158527	-4.90394	9.3933e-07	1.49442e-05	Jund	HANDPHALANGES1	HANDPHALANGES3
ENSMUSG00000094627	277.847	-0.935182	0.190784	-4.90177	9.49762e-07	1.50981e-05	Gm10182	HANDPHALANGES1	HANDPHALANGES3
ENSMUSG00000062797	1181.84	-0.611441	0.124922	-4.89456	9.85253e-07	1.56372e-05	Hikeshi	HANDPHALANGES1	HANDPHALANGES3
ENSMUSG00000081824	290.486	-1.04918	0.214425	-4.89302	9.93e-07	1.57476e-05	Ndufs5-ps	HANDPHALANGES1	HANDPHALANGES3
ENSMUSG00000032051	470.067	-0.785099	0.160506	-4.8914	1.0012e-06	1.58592e-05	Fdx1	HANDPHALANGES1	HANDPHALANGES3
ENSMUSG00000051111	108.145	1.44999	0.296443	4.89132	1.00163e-06	1.58592e-05	Sv2c	HANDPHALANGES1	HANDPHALANGES3
ENSMUSG00000018548	846.174	0.752915	0.153956	4.89046	1.006e-06	1.58902e-05	Trim37	HANDPHALANGES1	HANDPHALANGES3
ENSMUSG00000021536	1180.31	0.625988	0.128	4.89052	1.0057e-06	1.58902e-05	Adcy2	HANDPHALANGES1	HANDPHALANGES3
ENSMUSG00000024446	417.609	-0.945104	0.193327	-4.88864	1.01536e-06	1.60255e-05	Rpp21	HANDPHALANGES1	HANDPHALANGES3
ENSMUSG00000024829	763.45	-0.863067	0.17661	-4.88685	1.02461e-06	1.61586e-05	Mrpl21	HANDPHALANGES1	HANDPHALANGES3
ENSMUSG00000049265	47.4303	-2.37438	0.485971	-4.88584	1.02988e-06	1.62158e-05	Kcnk3	HANDPHALANGES1	HANDPHALANGES3
ENSMUSG00000063200	727.263	-0.68491	0.140226	-4.88432	1.03788e-06	1.6316e-05	Nol7	HANDPHALANGES1	HANDPHALANGES3
ENSMUSG00000029918	1335.51	-0.785015	0.160764	-4.88302	1.04473e-06	1.64106e-05	Mrps33	HANDPHALANGES1	HANDPHALANGES3
ENSMUSG00000024076	40.7984	2.5174	0.515657	4.88192	1.05056e-06	1.64893e-05	Vit	HANDPHALANGES1	HANDPHALANGES3
ENSMUSG00000078719	44.6213	-2.11433	0.433294	-4.87966	1.06267e-06	1.66529e-05	Msmp	HANDPHALANGES1	HANDPHALANGES3
ENSMUSG00000042804	1205.31	0.866734	0.177638	4.87921	1.06509e-06	1.66777e-05	Gpr153	HANDPHALANGES1	HANDPHALANGES3
ENSMUSG00000086321	14.6096	4.97762	1.02043	4.87798	1.07177e-06	1.67691e-05	Gm11413	HANDPHALANGES1	HANDPHALANGES3
ENSMUSG00000029648	386.733	0.743299	0.152384	4.87779	1.0728e-06	1.67721e-05	Flt1	HANDPHALANGES1	HANDPHALANGES3
ENSMUSG00000034295	81.1377	1.98602	0.407255	4.8766	1.07928e-06	1.686e-05	Fhod3	HANDPHALANGES1	HANDPHALANGES3
ENSMUSG00000024099	3128.08	-0.646512	0.132623	-4.8748	1.08918e-06	1.70013e-05	Ndufv2	HANDPHALANGES1	HANDPHALANGES3
ENSMUSG00000037410	758.917	0.690634	0.141681	4.87458	1.09038e-06	1.70067e-05	Tbc1d2b	HANDPHALANGES1	HANDPHALANGES3
ENSMUSG00000059182	129.337	1.07879	0.221371	4.87321	1.09801e-06	1.70988e-05	Skap2	HANDPHALANGES1	HANDPHALANGES3
ENSMUSG00000069744	2946.87	-0.6953	0.142677	-4.87325	1.09776e-06	1.70988e-05	Psmb3	HANDPHALANGES1	HANDPHALANGES3
ENSMUSG00000022312	3983.59	-0.645042	0.132438	-4.87051	1.11311e-06	1.73068e-05	Eif3h	HANDPHALANGES1	HANDPHALANGES3
ENSMUSG00000031161	1409.79	0.808233	0.165994	4.86905	1.12138e-06	1.74218e-05	Hdac6	HANDPHALANGES1	HANDPHALANGES3
ENSMUSG00000008036	1182.89	-0.74436	0.152885	-4.86877	1.12297e-06	1.74328e-05	Ap2s1	HANDPHALANGES1	HANDPHALANGES3
ENSMUSG00000005732	4124.42	-0.673665	0.138413	-4.86708	1.1326e-06	1.75686e-05	Ranbp1	HANDPHALANGES1	HANDPHALANGES3
ENSMUSG00000033323	754.319	0.725621	0.149138	4.86545	1.14199e-06	1.77005e-05	Ctdp1	HANDPHALANGES1	HANDPHALANGES3
ENSMUSG00000021967	828.424	-0.77213	0.158755	-4.86366	1.15237e-06	1.78473e-05	Mrpl57	HANDPHALANGES1	HANDPHALANGES3
ENSMUSG00000030022	428.66	0.772674	0.158916	4.86216	1.16115e-06	1.79693e-05	Adamts9	HANDPHALANGES1	HANDPHALANGES3
ENSMUSG00000118219	42.3021	-2.42707	0.499193	-4.86198	1.1622e-06	1.79715e-05	Gm29695	HANDPHALANGES1	HANDPHALANGES3
ENSMUSG00000037225	436.901	0.773983	0.159224	4.86097	1.16809e-06	1.80487e-05	Fgf2	HANDPHALANGES1	HANDPHALANGES3
ENSMUSG00000038301	360.109	0.881228	0.181471	4.85602	1.19769e-06	1.84916e-05	Snx10	HANDPHALANGES1	HANDPHALANGES3
ENSMUSG00000028397	775.609	0.658721	0.135655	4.85584	1.19876e-06	1.84937e-05	Kdm4c	HANDPHALANGES1	HANDPHALANGES3
ENSMUSG00000027624	844.187	0.704702	0.145148	4.85505	1.20353e-06	1.85529e-05	Epb41l1	HANDPHALANGES1	HANDPHALANGES3
ENSMUSG00000064356	1577	-0.672674	0.138616	-4.85278	1.21742e-06	1.87524e-05	mt-Atp8	HANDPHALANGES1	HANDPHALANGES3
ENSMUSG00000049960	828.217	-0.860277	0.177358	-4.85051	1.23146e-06	1.89405e-05	Mrps16	HANDPHALANGES1	HANDPHALANGES3
ENSMUSG00000110275	147.01	-1.46489	0.302009	-4.8505	1.23154e-06	1.89405e-05	Gm5905	HANDPHALANGES1	HANDPHALANGES3
ENSMUSG00000018899	446.226	0.755005	0.155664	4.85023	1.23319e-06	1.89513e-05	Irf1	HANDPHALANGES1	HANDPHALANGES3
ENSMUSG00000090258	785.103	-0.698749	0.144075	-4.84989	1.23531e-06	1.89691e-05	Churc1	HANDPHALANGES1	HANDPHALANGES3
ENSMUSG00000026090	101.321	1.60674	0.331429	4.84791	1.24769e-06	1.91297e-05	Cracdl	HANDPHALANGES1	HANDPHALANGES3
ENSMUSG00000028681	576.587	1.17003	0.241614	4.84256	1.28176e-06	1.96217e-05	Ptch2	HANDPHALANGES1	HANDPHALANGES3
ENSMUSG00000046312	77.7888	-1.90685	0.393789	-4.84231	1.28337e-06	1.96313e-05	Myorg	HANDPHALANGES1	HANDPHALANGES3
ENSMUSG00000043131	2238.4	0.585078	0.120832	4.84209	1.28478e-06	1.96376e-05	Mob1a	HANDPHALANGES1	HANDPHALANGES3
ENSMUSG00000028567	860.896	-0.639823	0.132155	-4.84148	1.28877e-06	1.96835e-05	Txndc12	HANDPHALANGES1	HANDPHALANGES3
ENSMUSG00000005510	1847.66	-0.621416	0.128364	-4.84105	1.29156e-06	1.9711e-05	Ndufs3	HANDPHALANGES1	HANDPHALANGES3
ENSMUSG00000043019	695.527	0.75748	0.156785	4.83134	1.35619e-06	2.06339e-05	Edem3	HANDPHALANGES1	HANDPHALANGES3
ENSMUSG00000021243	1054.85	-0.649924	0.134569	-4.82967	1.36761e-06	2.07917e-05	Fcf1	HANDPHALANGES1	HANDPHALANGES3
ENSMUSG00000001056	1103.7	-0.800721	0.16581	-4.82914	1.37125e-06	2.0831e-05	Nhp2	HANDPHALANGES1	HANDPHALANGES3
ENSMUSG00000022982	1075.25	-0.677745	0.140369	-4.82832	1.37692e-06	2.09012e-05	Sod1	HANDPHALANGES1	HANDPHALANGES3
ENSMUSG00000026511	1365.19	-0.721297	0.149427	-4.8271	1.38534e-06	2.10129e-05	Srp9	HANDPHALANGES1	HANDPHALANGES3
ENSMUSG00000068747	762.548	0.814329	0.168835	4.82324	1.41247e-06	2.14081e-05	Sort1	HANDPHALANGES1	HANDPHALANGES3
ENSMUSG00000024181	1857.76	-0.664947	0.137899	-4.822	1.42124e-06	2.15081e-05	Mrpl28	HANDPHALANGES1	HANDPHALANGES3
ENSMUSG00000079427	410.34	-0.796966	0.165319	-4.82079	1.42994e-06	2.16063e-05	Mthfsl	HANDPHALANGES1	HANDPHALANGES3
ENSMUSG00000092395	348.965	-0.7889	0.163664	-4.82025	1.4338e-06	2.16158e-05	Gm20463	HANDPHALANGES1	HANDPHALANGES3
ENSMUSG00000063623	570.434	-0.836186	0.173639	-4.81566	1.46718e-06	2.20855e-05	C230062I16Rik	HANDPHALANGES1	HANDPHALANGES3
ENSMUSG00000034098	49.1404	7.35312	1.52917	4.80858	1.52006e-06	2.27952e-05	Fstl5	HANDPHALANGES1	HANDPHALANGES3
ENSMUSG00000049044	111.56	1.25399	0.26102	4.80421	1.55365e-06	2.32813e-05	Rapgef4	HANDPHALANGES1	HANDPHALANGES3
ENSMUSG00000009394	18.4448	4.58204	0.953835	4.80381	1.55673e-06	2.33099e-05	Syn2	HANDPHALANGES1	HANDPHALANGES3
ENSMUSG00000022489	119.466	1.37981	0.287318	4.80236	1.56807e-06	2.34443e-05	Pde1b	HANDPHALANGES1	HANDPHALANGES3
ENSMUSG00000067653	237.873	0.975051	0.203036	4.80236	1.56803e-06	2.34443e-05	Ankrd23	HANDPHALANGES1	HANDPHALANGES3
ENSMUSG00000078681	1090.08	-0.652081	0.135802	-4.80169	1.57332e-06	2.3505e-05	Tm2d3	HANDPHALANGES1	HANDPHALANGES3
ENSMUSG00000037071	96.5676	1.35798	0.282882	4.8005	1.58268e-06	2.36272e-05	Scd1	HANDPHALANGES1	HANDPHALANGES3
ENSMUSG00000022762	38.6331	2.73627	0.570211	4.79869	1.59704e-06	2.38236e-05	Ncam2	HANDPHALANGES1	HANDPHALANGES3
ENSMUSG00000002043	464.855	-0.745331	0.15533	-4.79837	1.5996e-06	2.38439e-05	Trappc6a	HANDPHALANGES1	HANDPHALANGES3
ENSMUSG00000021340	183.484	1.13579	0.236805	4.79633	1.61601e-06	2.40705e-05	Gpld1	HANDPHALANGES1	HANDPHALANGES3
ENSMUSG00000110841	182.486	-1.00768	0.210102	-4.79615	1.61745e-06	2.40738e-05	Gpx4-ps2	HANDPHALANGES1	HANDPHALANGES3
ENSMUSG00000052854	1793.1	0.813068	0.169572	4.79482	1.62824e-06	2.41981e-05	Nrk	HANDPHALANGES1	HANDPHALANGES3
ENSMUSG00000089762	731.366	-0.710975	0.148278	-4.79487	1.62778e-06	2.41981e-05	Ier5l	HANDPHALANGES1	HANDPHALANGES3
ENSMUSG00000030763	639.91	-0.726508	0.151528	-4.79455	1.63038e-06	2.42062e-05	Lcmt1	HANDPHALANGES1	HANDPHALANGES3
ENSMUSG00000038375	448.527	1.00859	0.210366	4.79445	1.63122e-06	2.42062e-05	Trp53inp2	HANDPHALANGES1	HANDPHALANGES3
ENSMUSG00000025868	922.585	-0.835603	0.174394	-4.79146	1.65571e-06	2.45513e-05	Higd2a	HANDPHALANGES1	HANDPHALANGES3
ENSMUSG00000090035	538.151	0.794591	0.165885	4.79001	1.6677e-06	2.47106e-05	Galnt4	HANDPHALANGES1	HANDPHALANGES3
ENSMUSG00000038267	277.377	0.91099	0.190204	4.78954	1.67166e-06	2.47508e-05	Slc22a23	HANDPHALANGES1	HANDPHALANGES3
ENSMUSG00000046182	308.695	1.15574	0.241423	4.78721	1.69117e-06	2.50211e-05	Gsg1l	HANDPHALANGES1	HANDPHALANGES3
ENSMUSG00000022748	423.289	-0.774607	0.161857	-4.78574	1.70359e-06	2.51808e-05	Cmss1	HANDPHALANGES1	HANDPHALANGES3
ENSMUSG00000053453	1554.2	-0.585539	0.122355	-4.78556	1.70512e-06	2.51808e-05	Thoc7	HANDPHALANGES1	HANDPHALANGES3
ENSMUSG00000027955	375	0.783476	0.163754	4.78448	1.71433e-06	2.52696e-05	Gask1b	HANDPHALANGES1	HANDPHALANGES3
ENSMUSG00000050103	14.0839	4.24066	0.886543	4.78336	1.72388e-06	2.53914e-05	Agmo	HANDPHALANGES1	HANDPHALANGES3
ENSMUSG00000062691	353.094	-0.938645	0.196471	-4.77752	1.77472e-06	2.60436e-05	Cebpzos	HANDPHALANGES1	HANDPHALANGES3
ENSMUSG00000021959	1622.97	0.741244	0.155279	4.77363	1.80932e-06	2.65122e-05	Lats2	HANDPHALANGES1	HANDPHALANGES3
ENSMUSG00000098332	272.897	-0.98279	0.206158	-4.76717	1.86829e-06	2.72958e-05	Pigbos1	HANDPHALANGES1	HANDPHALANGES3
ENSMUSG00000083380	291.709	-1.12099	0.23529	-4.76427	1.89539e-06	2.76509e-05	Ndufb4c	HANDPHALANGES1	HANDPHALANGES3
ENSMUSG00000027864	516.678	-0.666489	0.139898	-4.7641	1.89695e-06	2.76534e-05	Ptgfrn	HANDPHALANGES1	HANDPHALANGES3
ENSMUSG00000033735	377.935	-0.72847	0.152923	-4.76365	1.90119e-06	2.76948e-05	Spr	HANDPHALANGES1	HANDPHALANGES3
ENSMUSG00000026239	1146.8	-0.581588	0.122135	-4.76185	1.91824e-06	2.79228e-05	Pde6d	HANDPHALANGES1	HANDPHALANGES3
ENSMUSG00000060739	1240.93	-0.734779	0.154403	-4.75885	1.94699e-06	2.83205e-05	Nsa2	HANDPHALANGES1	HANDPHALANGES3
ENSMUSG00000026692	13.8737	5.5316	1.16308	4.75598	1.97484e-06	2.86836e-05	Fmo4	HANDPHALANGES1	HANDPHALANGES3
ENSMUSG00000013622	3021.02	-0.59762	0.125807	-4.75029	2.0313e-06	2.94175e-05	Atraid	HANDPHALANGES1	HANDPHALANGES3
ENSMUSG00000057388	1826.53	-0.609683	0.128378	-4.74914	2.04281e-06	2.95627e-05	Mrpl18	HANDPHALANGES1	HANDPHALANGES3
ENSMUSG00000036995	696.396	0.730105	0.15374	4.74895	2.04473e-06	2.9569e-05	Asap3	HANDPHALANGES1	HANDPHALANGES3
ENSMUSG00000028519	188.482	-0.860583	0.181227	-4.74864	2.04785e-06	2.95924e-05	Dab1	HANDPHALANGES1	HANDPHALANGES3
ENSMUSG00000021716	401.704	-0.709722	0.149469	-4.74828	2.05153e-06	2.96241e-05	Srek1ip1	HANDPHALANGES1	HANDPHALANGES3
ENSMUSG00000040728	164.579	-2.21929	0.467409	-4.74808	2.05359e-06	2.96323e-05	Esrp1	HANDPHALANGES1	HANDPHALANGES3
ENSMUSG00000044734	161.653	-1.04346	0.219941	-4.74428	2.09247e-06	3.01714e-05	Serpinb1a	HANDPHALANGES1	HANDPHALANGES3
ENSMUSG00000062382	1948.72	-0.695924	0.146723	-4.74312	2.10447e-06	3.03005e-05	Ftl1-ps1	HANDPHALANGES1	HANDPHALANGES3
ENSMUSG00000035681	12.9484	5.05845	1.0667	4.74217	2.11442e-06	3.04217e-05	Kcnc2	HANDPHALANGES1	HANDPHALANGES3
ENSMUSG00000017446	287.131	1.20998	0.255198	4.74134	2.12307e-06	3.0505e-05	C1qtnf1	HANDPHALANGES1	HANDPHALANGES3
ENSMUSG00000031398	806.486	0.887252	0.187132	4.74132	2.12329e-06	3.0505e-05	Plxna3	HANDPHALANGES1	HANDPHALANGES3
ENSMUSG00000027002	2451.27	0.687263	0.145003	4.73965	2.14091e-06	3.0736e-05	Nckap1	HANDPHALANGES1	HANDPHALANGES3
ENSMUSG00000036880	1639.8	-0.596047	0.125769	-4.73922	2.1454e-06	3.07781e-05	Acaa2	HANDPHALANGES1	HANDPHALANGES3
ENSMUSG00000040146	29.7994	3.28189	0.692581	4.73863	2.15166e-06	3.08457e-05	Rgl3	HANDPHALANGES1	HANDPHALANGES3
ENSMUSG00000022635	824.964	-0.663034	0.14003	-4.73493	2.19133e-06	3.13917e-05	Zcrb1	HANDPHALANGES1	HANDPHALANGES3
ENSMUSG00000028821	1021.98	-0.617113	0.130342	-4.73456	2.1953e-06	3.14258e-05	Syf2	HANDPHALANGES1	HANDPHALANGES3
ENSMUSG00000020473	580.662	0.88221	0.18651	4.7301	2.2441e-06	3.20718e-05	Aebp1	HANDPHALANGES1	HANDPHALANGES3
ENSMUSG00000061527	2824.83	-2.57486	0.544447	-4.72932	2.25275e-06	3.21555e-05	Krt5	HANDPHALANGES1	HANDPHALANGES3
ENSMUSG00000024044	4141.37	0.62642	0.132482	4.72835	2.26355e-06	3.22865e-05	Epb41l3	HANDPHALANGES1	HANDPHALANGES3
ENSMUSG00000020456	3121.9	0.611751	0.129453	4.72564	2.29387e-06	3.26253e-05	Ogdh	HANDPHALANGES1	HANDPHALANGES3
ENSMUSG00000020908	20.8679	-5.76832	1.22125	-4.72329	2.32061e-06	3.29819e-05	Myh3	HANDPHALANGES1	HANDPHALANGES3
ENSMUSG00000025927	854.183	1.86139	0.394243	4.72143	2.34196e-06	3.31903e-05	Tfap2b	HANDPHALANGES1	HANDPHALANGES3
ENSMUSG00000028795	544.955	-0.640136	0.135581	-4.72143	2.34189e-06	3.31903e-05	Ccdc28b	HANDPHALANGES1	HANDPHALANGES3
ENSMUSG00000102460	297.115	-0.829509	0.175735	-4.72023	2.35583e-06	3.3363e-05	Gm38197	HANDPHALANGES1	HANDPHALANGES3
ENSMUSG00000026478	1224.42	0.696669	0.147658	4.71813	2.38017e-06	3.36837e-05	Lamc1	HANDPHALANGES1	HANDPHALANGES3
ENSMUSG00000036398	1158.47	-0.816018	0.172997	-4.71696	2.39395e-06	3.38546e-05	Ppp1r11	HANDPHALANGES1	HANDPHALANGES3
ENSMUSG00000060152	481.153	-0.812699	0.172307	-4.71657	2.39859e-06	3.3896e-05	Pop5	HANDPHALANGES1	HANDPHALANGES3
ENSMUSG00000037892	3789.15	0.609813	0.129302	4.7162	2.40293e-06	3.39333e-05	Pcdh18	HANDPHALANGES1	HANDPHALANGES3
ENSMUSG00000020308	829.648	-0.686943	0.145816	-4.71104	2.46461e-06	3.46809e-05	Tpgs1	HANDPHALANGES1	HANDPHALANGES3
ENSMUSG00000001930	64.7534	1.73648	0.368648	4.7104	2.47233e-06	3.4765e-05	Vwf	HANDPHALANGES1	HANDPHALANGES3
ENSMUSG00000027210	98.5532	-1.86377	0.395692	-4.71014	2.47544e-06	3.47841e-05	Meis2	HANDPHALANGES1	HANDPHALANGES3
ENSMUSG00000037938	436.963	-0.629449	0.13379	-4.70475	2.54178e-06	3.56406e-05	Chchd5	HANDPHALANGES1	HANDPHALANGES3
ENSMUSG00000034634	1923.75	-4.72799	1.0052	-4.70351	2.55727e-06	3.58325e-05	Ly6d	HANDPHALANGES1	HANDPHALANGES3
ENSMUSG00000030793	351.075	-1.04076	0.221294	-4.70305	2.563e-06	3.58875e-05	Pycard	HANDPHALANGES1	HANDPHALANGES3
ENSMUSG00000043687	109.611	-1.34725	0.286725	-4.69877	2.61735e-06	3.66225e-05	1190005I06Rik	HANDPHALANGES1	HANDPHALANGES3
ENSMUSG00000042379	38.7263	2.71026	0.576827	4.69856	2.61997e-06	3.66334e-05	Esm1	HANDPHALANGES1	HANDPHALANGES3
ENSMUSG00000004610	1832.67	-0.695533	0.148053	-4.69788	2.62881e-06	3.67054e-05	Etfb	HANDPHALANGES1	HANDPHALANGES3
ENSMUSG00000036437	28.7364	4.00792	0.85436	4.69114	2.71693e-06	3.77763e-05	Npy1r	HANDPHALANGES1	HANDPHALANGES3
ENSMUSG00000078348	796.433	-0.874923	0.186511	-4.69099	2.71884e-06	3.77764e-05	Sf3b5	HANDPHALANGES1	HANDPHALANGES3
ENSMUSG00000074884	10374.2	-0.591111	0.12604	-4.68985	2.73403e-06	3.79345e-05	Serf2	HANDPHALANGES1	HANDPHALANGES3
ENSMUSG00000083669	42.4277	-1.83749	0.392053	-4.68684	2.77455e-06	3.84614e-05	Mif-ps4	HANDPHALANGES1	HANDPHALANGES3
ENSMUSG00000009376	239.323	0.864658	0.184564	4.68486	2.80152e-06	3.87626e-05	Met	HANDPHALANGES1	HANDPHALANGES3
ENSMUSG00000031636	1607.75	0.772946	0.165003	4.68443	2.80744e-06	3.88173e-05	Pdlim3	HANDPHALANGES1	HANDPHALANGES3
ENSMUSG00000020700	1986.71	0.713283	0.152356	4.68169	2.8452e-06	3.9312e-05	Map3k3	HANDPHALANGES1	HANDPHALANGES3
ENSMUSG00000020183	2330.2	-0.656174	0.140179	-4.68098	2.855e-06	3.94049e-05	Cpm	HANDPHALANGES1	HANDPHALANGES3
ENSMUSG00000042293	177.619	-1.17874	0.251818	-4.68092	2.85589e-06	3.94049e-05	Gm5617	HANDPHALANGES1	HANDPHALANGES3
ENSMUSG00000054555	202.835	0.908292	0.194088	4.67978	2.87176e-06	3.95964e-05	Adam12	HANDPHALANGES1	HANDPHALANGES3
ENSMUSG00000044709	1287.19	-0.656304	0.140357	-4.67596	2.92577e-06	4.03131e-05	Gemin7	HANDPHALANGES1	HANDPHALANGES3
ENSMUSG00000023939	838.535	-0.91828	0.196444	-4.67452	2.9464e-06	4.05692e-05	Mrpl14	HANDPHALANGES1	HANDPHALANGES3
ENSMUSG00000020441	291.405	-0.88289	0.189095	-4.66904	3.02616e-06	4.16077e-05	2310033P09Rik	HANDPHALANGES1	HANDPHALANGES3
ENSMUSG00000033307	2864.44	-0.736022	0.157643	-4.6689	3.02811e-06	4.16077e-05	Mif	HANDPHALANGES1	HANDPHALANGES3
ENSMUSG00000114827	73.2631	-1.39714	0.299358	-4.66713	3.05434e-06	4.191e-05	Gm46432	HANDPHALANGES1	HANDPHALANGES3
ENSMUSG00000009633	226.639	-0.912077	0.195444	-4.66669	3.06091e-06	4.19712e-05	G0s2	HANDPHALANGES1	HANDPHALANGES3
ENSMUSG00000062248	1199.81	-0.765562	0.16406	-4.66634	3.06606e-06	4.20129e-05	Cks2	HANDPHALANGES1	HANDPHALANGES3
ENSMUSG00000028860	125.393	-1.87064	0.400914	-4.66593	3.07224e-06	4.20685e-05	Sytl1	HANDPHALANGES1	HANDPHALANGES3
ENSMUSG00000025198	1261.97	0.61758	0.132427	4.66357	3.10778e-06	4.24673e-05	Erlin1	HANDPHALANGES1	HANDPHALANGES3
ENSMUSG00000035671	1090.46	0.593351	0.127228	4.66367	3.10617e-06	4.24673e-05	Zswim4	HANDPHALANGES1	HANDPHALANGES3
ENSMUSG00000085541	148.091	-1.01097	0.216805	-4.66304	3.11569e-06	4.25461e-05	Gm16010	HANDPHALANGES1	HANDPHALANGES3
ENSMUSG00000000594	1273.22	0.694149	0.14903	4.65778	3.19637e-06	4.35579e-05	Gm2a	HANDPHALANGES1	HANDPHALANGES3
ENSMUSG00000058301	1258.43	0.896905	0.192708	4.65422	3.25217e-06	4.4288e-05	Upf1	HANDPHALANGES1	HANDPHALANGES3
ENSMUSG00000026202	553.133	-0.822183	0.17666	-4.65403	3.25507e-06	4.4297e-05	Tuba4a	HANDPHALANGES1	HANDPHALANGES3
ENSMUSG00000021963	2357.47	-0.631591	0.13576	-4.65226	3.28311e-06	4.46481e-05	Sap18	HANDPHALANGES1	HANDPHALANGES3
ENSMUSG00000014074	654.543	0.830198	0.17862	4.64785	3.3541e-06	4.55823e-05	Rnf168	HANDPHALANGES1	HANDPHALANGES3
ENSMUSG00000014633	383.349	-0.909165	0.195688	-4.64599	3.38454e-06	4.59644e-05	Cmc2	HANDPHALANGES1	HANDPHALANGES3
ENSMUSG00000082035	74.8958	-1.50654	0.324299	-4.64553	3.39205e-06	4.6035e-05	Rpl17-ps8	HANDPHALANGES1	HANDPHALANGES3
ENSMUSG00000002732	1310.37	-0.647603	0.139539	-4.64101	3.46716e-06	4.70221e-05	Fkbp7	HANDPHALANGES1	HANDPHALANGES3
ENSMUSG00000025102	246.645	-0.891519	0.19213	-4.64019	3.48089e-06	4.71762e-05	3110040N11Rik	HANDPHALANGES1	HANDPHALANGES3
ENSMUSG00000043391	1591	0.604521	0.130296	4.63961	3.49073e-06	4.7245e-05	2510009E07Rik	HANDPHALANGES1	HANDPHALANGES3
ENSMUSG00000046178	60.0187	2.27868	0.491321	4.63786	3.52032e-06	4.7613e-05	Nxph1	HANDPHALANGES1	HANDPHALANGES3
ENSMUSG00000054662	95.0381	-3.26075	0.703101	-4.63767	3.52363e-06	4.76253e-05	Ano9	HANDPHALANGES1	HANDPHALANGES3
ENSMUSG00000021604	18.9373	-4.60407	0.993449	-4.63443	3.57923e-06	4.83014e-05	Irx4	HANDPHALANGES1	HANDPHALANGES3
ENSMUSG00000023972	2278.48	0.667401	0.144012	4.63434	3.58084e-06	4.83014e-05	Ptk7	HANDPHALANGES1	HANDPHALANGES3
ENSMUSG00000045107	541.847	-0.782197	0.168783	-4.63433	3.58094e-06	4.83014e-05	Saysd1	HANDPHALANGES1	HANDPHALANGES3
ENSMUSG00000019158	375.523	-1.05761	0.228241	-4.63375	3.59103e-06	4.83717e-05	Tmem160	HANDPHALANGES1	HANDPHALANGES3
ENSMUSG00000031950	1490.07	-0.632325	0.136486	-4.6329	3.6058e-06	4.85377e-05	Gabarapl2	HANDPHALANGES1	HANDPHALANGES3
ENSMUSG00000030703	183.267	-0.939806	0.202879	-4.63235	3.61535e-06	4.86333e-05	Gdpd3	HANDPHALANGES1	HANDPHALANGES3
ENSMUSG00000007029	2038.63	0.656107	0.141855	4.62518	3.74266e-06	5.02437e-05	Vars1	HANDPHALANGES1	HANDPHALANGES3
ENSMUSG00000045312	1151.59	0.657624	0.142274	4.62224	3.79618e-06	5.08591e-05	Lhfpl2	HANDPHALANGES1	HANDPHALANGES3
ENSMUSG00000113450	526.175	0.711149	0.153866	4.62186	3.80309e-06	5.09173e-05	Zfp935	HANDPHALANGES1	HANDPHALANGES3
ENSMUSG00000025466	127.527	-1.31274	0.284078	-4.62105	3.81809e-06	5.10836e-05	Fuom	HANDPHALANGES1	HANDPHALANGES3
ENSMUSG00000073371	122.917	-1.22964	0.266217	-4.61895	3.85689e-06	5.15334e-05	Gm6594	HANDPHALANGES1	HANDPHALANGES3
ENSMUSG00000040325	772.26	0.90587	0.196238	4.61619	3.9085e-06	5.20828e-05	Dcaf1	HANDPHALANGES1	HANDPHALANGES3
ENSMUSG00000038812	962.478	-0.713132	0.154519	-4.61519	3.92745e-06	5.23002e-05	Trmt112	HANDPHALANGES1	HANDPHALANGES3
ENSMUSG00000029720	442.041	0.727603	0.157745	4.61254	3.97785e-06	5.29358e-05	Gm20605	HANDPHALANGES1	HANDPHALANGES3
ENSMUSG00000031617	1111.83	0.661447	0.143649	4.6046	4.13263e-06	5.48851e-05	Tmem184c	HANDPHALANGES1	HANDPHALANGES3
ENSMUSG00000091183	430.622	0.753491	0.163695	4.60302	4.16411e-06	5.52294e-05	Gm5141	HANDPHALANGES1	HANDPHALANGES3
ENSMUSG00000078919	492.965	-0.75587	0.164243	-4.60213	4.1819e-06	5.54283e-05	Dpm1	HANDPHALANGES1	HANDPHALANGES3
ENSMUSG00000032288	760.668	-0.733922	0.159497	-4.60148	4.19497e-06	5.55645e-05	Imp3	HANDPHALANGES1	HANDPHALANGES3
ENSMUSG00000023008	1381.73	1.59001	0.345556	4.6013	4.19857e-06	5.55751e-05	Fmnl3	HANDPHALANGES1	HANDPHALANGES3
ENSMUSG00000045160	450.414	-0.947811	0.206022	-4.60054	4.21402e-06	5.57424e-05	Bola3	HANDPHALANGES1	HANDPHALANGES3
ENSMUSG00000039759	517.622	-0.682977	0.148482	-4.59973	4.23047e-06	5.59227e-05	Thap3	HANDPHALANGES1	HANDPHALANGES3
ENSMUSG00000067279	510.066	-0.62388	0.135694	-4.5977	4.27187e-06	5.64324e-05	Ppp1r3c	HANDPHALANGES1	HANDPHALANGES3
ENSMUSG00000032484	31.3035	4.39836	0.956998	4.596	4.30687e-06	5.68569e-05	Ngp	HANDPHALANGES1	HANDPHALANGES3
ENSMUSG00000060424	143.486	-0.991678	0.215902	-4.59319	4.36523e-06	5.75892e-05	Pantr1	HANDPHALANGES1	HANDPHALANGES3
ENSMUSG00000045545	3212.58	-3.62841	0.790006	-4.59289	4.37146e-06	5.7624e-05	Krt14	HANDPHALANGES1	HANDPHALANGES3
ENSMUSG00000070691	861.588	0.758153	0.165094	4.59225	4.38495e-06	5.77342e-05	Runx3	HANDPHALANGES1	HANDPHALANGES3
ENSMUSG00000033845	1179.93	-0.58577	0.127661	-4.58847	4.46499e-06	5.86714e-05	Mrpl15	HANDPHALANGES1	HANDPHALANGES3
ENSMUSG00000040723	284.682	1.00804	0.219948	4.58306	4.58214e-06	6.01709e-05	Rcsd1	HANDPHALANGES1	HANDPHALANGES3
ENSMUSG00000068735	794.441	0.855282	0.186638	4.58257	4.59288e-06	6.02098e-05	Trp53i11	HANDPHALANGES1	HANDPHALANGES3
ENSMUSG00000021123	305.781	-0.910154	0.198687	-4.58085	4.63096e-06	6.06515e-05	Rdh12	HANDPHALANGES1	HANDPHALANGES3
ENSMUSG00000050910	673.83	0.826836	0.180542	4.57974	4.65564e-06	6.09346e-05	Cdr2l	HANDPHALANGES1	HANDPHALANGES3
ENSMUSG00000031555	772.634	0.59448	0.129843	4.57845	4.68435e-06	6.12526e-05	Adam9	HANDPHALANGES1	HANDPHALANGES3
ENSMUSG00000087149	278.896	1.37174	0.299792	4.57565	4.74747e-06	6.1973e-05	Itih6	HANDPHALANGES1	HANDPHALANGES3
ENSMUSG00002075463	39.2131	-2.0228	0.442133	-4.5751	4.75986e-06	6.20939e-05	Gm56190	HANDPHALANGES1	HANDPHALANGES3
ENSMUSG00000022822	1617.04	0.763309	0.166878	4.57405	4.78386e-06	6.23491e-05	Abcc5	HANDPHALANGES1	HANDPHALANGES3
ENSMUSG00000023927	263.17	0.864167	0.189034	4.57149	4.84263e-06	6.30494e-05	Satb1	HANDPHALANGES1	HANDPHALANGES3
ENSMUSG00000037443	573.803	0.604345	0.132212	4.57102	4.8536e-06	6.31095e-05	Cep85	HANDPHALANGES1	HANDPHALANGES3
ENSMUSG00000035109	880.288	-0.61408	0.134371	-4.57003	4.87645e-06	6.33652e-05	Shc4	HANDPHALANGES1	HANDPHALANGES3
ENSMUSG00000019797	513.123	-0.668459	0.146304	-4.56897	4.90124e-06	6.35625e-05	Mtres1	HANDPHALANGES1	HANDPHALANGES3
ENSMUSG00000024211	123.569	1.32411	0.289832	4.56853	4.91165e-06	6.36559e-05	Grm8	HANDPHALANGES1	HANDPHALANGES3
ENSMUSG00000033429	486.24	-0.816193	0.178749	-4.56614	4.96776e-06	6.43411e-05	Mcee	HANDPHALANGES1	HANDPHALANGES3
ENSMUSG00000032595	197.26	0.85596	0.187534	4.56428	5.012e-06	6.48717e-05	Cdhr4	HANDPHALANGES1	HANDPHALANGES3
ENSMUSG00000036181	322.659	-0.654821	0.143497	-4.56332	5.03516e-06	6.5129e-05	H1f2	HANDPHALANGES1	HANDPHALANGES3
ENSMUSG00000059049	600.542	-0.925543	0.202834	-4.56307	5.0412e-06	6.51648e-05	Frem1	HANDPHALANGES1	HANDPHALANGES3
ENSMUSG00000030516	705.021	0.666493	0.146086	4.56232	5.05904e-06	6.53528e-05	Tjp1	HANDPHALANGES1	HANDPHALANGES3
ENSMUSG00000012483	522.583	-0.766257	0.167971	-4.56185	5.07054e-06	6.54587e-05	Rpa3	HANDPHALANGES1	HANDPHALANGES3
ENSMUSG00000024201	1815.24	0.61303	0.134455	4.55937	5.13082e-06	6.6194e-05	Kdm4b	HANDPHALANGES1	HANDPHALANGES3
ENSMUSG00000029093	531.319	1.05938	0.232432	4.55778	5.16967e-06	6.65654e-05	Sorcs2	HANDPHALANGES1	HANDPHALANGES3
ENSMUSG00000027792	74.6338	2.153	0.472424	4.55735	5.18037e-06	6.66599e-05	Bche	HANDPHALANGES1	HANDPHALANGES3
ENSMUSG00000040310	415.09	-0.956604	0.209915	-4.5571	5.18648e-06	6.66953e-05	Alx4	HANDPHALANGES1	HANDPHALANGES3
ENSMUSG00000014856	1321.75	-0.606588	0.133122	-4.55662	5.19837e-06	6.68049e-05	Tmem208	HANDPHALANGES1	HANDPHALANGES3
ENSMUSG00000002496	1385.17	0.61194	0.134336	4.55529	5.23128e-06	6.71409e-05	Tsc2	HANDPHALANGES1	HANDPHALANGES3
ENSMUSG00000032673	603.827	-0.796115	0.174921	-4.55129	5.3319e-06	6.83882e-05	Prorsd1	HANDPHALANGES1	HANDPHALANGES3
ENSMUSG00000031666	983.502	0.642399	0.141259	4.54768	5.42415e-06	6.95264e-05	Rbl2	HANDPHALANGES1	HANDPHALANGES3
ENSMUSG00000032841	1179.6	0.647234	0.142357	4.54656	5.45298e-06	6.98509e-05	Prr5l	HANDPHALANGES1	HANDPHALANGES3
ENSMUSG00000029759	291.782	-0.74247	0.163319	-4.54613	5.46416e-06	6.9949e-05	Pon3	HANDPHALANGES1	HANDPHALANGES3
ENSMUSG00000090063	328.033	1.15817	0.254839	4.54471	5.50116e-06	7.03772e-05	Dlx6os1	HANDPHALANGES1	HANDPHALANGES3
ENSMUSG00000031533	526.522	-0.668576	0.147209	-4.54166	5.58117e-06	7.13089e-05	Mrps31	HANDPHALANGES1	HANDPHALANGES3
ENSMUSG00000030034	261.263	-0.744993	0.164055	-4.54113	5.59546e-06	7.14455e-05	Ino80b	HANDPHALANGES1	HANDPHALANGES3
ENSMUSG00000029725	261.502	-0.94222	0.207498	-4.54087	5.60232e-06	7.14871e-05	Ppp1r35	HANDPHALANGES1	HANDPHALANGES3
ENSMUSG00000032478	480.183	-0.627402	0.138186	-4.54027	5.61822e-06	7.1644e-05	Nme6	HANDPHALANGES1	HANDPHALANGES3
ENSMUSG00000022370	1520.5	-0.602747	0.132795	-4.53895	5.65358e-06	7.20254e-05	Mrpl13	HANDPHALANGES1	HANDPHALANGES3
ENSMUSG00000032353	2147.58	-0.580592	0.127915	-4.53888	5.65538e-06	7.20254e-05	Tmed3	HANDPHALANGES1	HANDPHALANGES3
ENSMUSG00000091367	47.4457	-1.5775	0.347639	-4.53774	5.68615e-06	7.23245e-05	NA	HANDPHALANGES1	HANDPHALANGES3
ENSMUSG00000004568	662.509	0.771061	0.170038	4.53465	5.77003e-06	7.33443e-05	Arhgef18	HANDPHALANGES1	HANDPHALANGES3
ENSMUSG00000032373	711.163	1.0844	0.239211	4.53322	5.80912e-06	7.3794e-05	Car12	HANDPHALANGES1	HANDPHALANGES3
ENSMUSG00000100691	224.208	-0.965067	0.212908	-4.53279	5.82094e-06	7.38969e-05	2010320M18Rik	HANDPHALANGES1	HANDPHALANGES3
ENSMUSG00000006941	1411.87	-0.598746	0.132175	-4.52993	5.90028e-06	7.48085e-05	Eif1b	HANDPHALANGES1	HANDPHALANGES3
ENSMUSG00000047261	394.019	-0.950214	0.209966	-4.52556	6.02368e-06	7.62756e-05	Gap43	HANDPHALANGES1	HANDPHALANGES3
ENSMUSG00000112639	77.5605	-1.3181	0.29128	-4.52519	6.03401e-06	7.63577e-05	A730063M14Rik	HANDPHALANGES1	HANDPHALANGES3
ENSMUSG00000060591	6147.1	-0.599034	0.132389	-4.52481	6.04501e-06	7.63995e-05	Ifitm2	HANDPHALANGES1	HANDPHALANGES3
ENSMUSG00000062480	674.915	-0.820358	0.181338	-4.52392	6.07058e-06	7.66739e-05	Acat3	HANDPHALANGES1	HANDPHALANGES3
ENSMUSG00000084106	115.123	-1.16457	0.257465	-4.52321	6.09075e-06	7.68797e-05	Gm6136	HANDPHALANGES1	HANDPHALANGES3
ENSMUSG00000029090	4953.28	0.606841	0.134247	4.52034	6.17404e-06	7.78321e-05	Adgra3	HANDPHALANGES1	HANDPHALANGES3
ENSMUSG00000042328	520.464	0.708817	0.156816	4.52007	6.18205e-06	7.78837e-05	Hps4	HANDPHALANGES1	HANDPHALANGES3
ENSMUSG00000029020	1309.65	0.617407	0.136613	4.5194	6.20153e-06	7.80795e-05	Mfn2	HANDPHALANGES1	HANDPHALANGES3
ENSMUSG00000046079	612.831	0.613569	0.13583	4.51717	6.26703e-06	7.88541e-05	Lrrc8d	HANDPHALANGES1	HANDPHALANGES3
ENSMUSG00000074259	70.7822	2.55401	0.565431	4.51693	6.27424e-06	7.88949e-05	Gramd2a	HANDPHALANGES1	HANDPHALANGES3
ENSMUSG00000074793	440.543	0.714251	0.158158	4.51607	6.2997e-06	7.91649e-05	Hspa12b	HANDPHALANGES1	HANDPHALANGES3
ENSMUSG00000084865	19.0697	3.05783	0.677176	4.51557	6.31477e-06	7.9255e-05	Gm15723	HANDPHALANGES1	HANDPHALANGES3
ENSMUSG00000108435	110.608	-1.04887	0.232278	-4.51556	6.31485e-06	7.9255e-05	Gm45051	HANDPHALANGES1	HANDPHALANGES3
ENSMUSG00000008822	209.526	-1.05583	0.233876	-4.5145	6.34662e-06	7.96033e-05	Acyp1	HANDPHALANGES1	HANDPHALANGES3
ENSMUSG00000029863	2074.63	0.687375	0.152299	4.51334	6.38144e-06	7.99895e-05	Casp2	HANDPHALANGES1	HANDPHALANGES3
ENSMUSG00000026135	420.777	0.811231	0.179761	4.51282	6.39701e-06	8.01342e-05	Zfp142	HANDPHALANGES1	HANDPHALANGES3
ENSMUSG00000056947	70.7611	-1.66986	0.370054	-4.51249	6.40718e-06	8.0211e-05	Mab21l1	HANDPHALANGES1	HANDPHALANGES3
ENSMUSG00000020736	596.944	-0.664951	0.147519	-4.50755	6.55799e-06	8.18867e-05	Nt5c	HANDPHALANGES1	HANDPHALANGES3
ENSMUSG00000030587	157.151	-1.02556	0.227513	-4.50768	6.55402e-06	8.18867e-05	2200002D01Rik	HANDPHALANGES1	HANDPHALANGES3
ENSMUSG00000039904	39.7581	3.13952	0.696521	4.50743	6.56166e-06	8.18867e-05	Gpr37	HANDPHALANGES1	HANDPHALANGES3
ENSMUSG00000045104	513.207	-0.605201	0.134301	-4.5063	6.59678e-06	8.22733e-05	Ldhb-ps	HANDPHALANGES1	HANDPHALANGES3
ENSMUSG00000089809	741.605	-0.671824	0.149207	-4.50262	6.71193e-06	8.36569e-05	Rasgef1b	HANDPHALANGES1	HANDPHALANGES3
ENSMUSG00000083621	96.2368	-1.2798	0.284322	-4.50123	6.75622e-06	8.41561e-05	Gm14586	HANDPHALANGES1	HANDPHALANGES3
ENSMUSG00000022701	214.357	-0.802886	0.178684	-4.49333	7.01171e-06	8.7011e-05	Ccdc191	HANDPHALANGES1	HANDPHALANGES3
ENSMUSG00000007777	730.814	-0.696831	0.155143	-4.49153	7.0712e-06	8.76944e-05	Trappc2b	HANDPHALANGES1	HANDPHALANGES3
ENSMUSG00000059213	15.9758	4.12085	0.917548	4.49115	7.08389e-06	8.77969e-05	Ddn	HANDPHALANGES1	HANDPHALANGES3
ENSMUSG00000024978	562.949	0.630482	0.14042	4.48997	7.12336e-06	8.8231e-05	Gpam	HANDPHALANGES1	HANDPHALANGES3
ENSMUSG00000075590	1271.44	0.651912	0.145219	4.48918	7.14987e-06	8.85041e-05	Nrbp2	HANDPHALANGES1	HANDPHALANGES3
ENSMUSG00000091021	261.824	-0.71924	0.160295	-4.48698	7.224e-06	8.93661e-05	Gm17300	HANDPHALANGES1	HANDPHALANGES3
ENSMUSG00000051671	282.966	-0.865342	0.19288	-4.48642	7.24302e-06	8.95455e-05	Coa6	HANDPHALANGES1	HANDPHALANGES3
ENSMUSG00000025068	1156.09	-0.595883	0.132826	-4.48619	7.25067e-06	8.95844e-05	Gsto1	HANDPHALANGES1	HANDPHALANGES3
ENSMUSG00000044628	75.9931	1.69703	0.378625	4.48209	7.39144e-06	9.12101e-05	Rnf208	HANDPHALANGES1	HANDPHALANGES3
ENSMUSG00000015522	1726.61	0.638801	0.142603	4.47956	7.47954e-06	9.20684e-05	Arnt	HANDPHALANGES1	HANDPHALANGES3
ENSMUSG00000018923	477.798	-0.725732	0.162028	-4.47905	7.49771e-06	9.21777e-05	Med11	HANDPHALANGES1	HANDPHALANGES3
ENSMUSG00000013921	1764.46	0.644435	0.143946	4.47691	7.57306e-06	9.30465e-05	Clip3	HANDPHALANGES1	HANDPHALANGES3
ENSMUSG00000022940	1002.36	-0.691094	0.154451	-4.47452	7.65814e-06	9.39175e-05	Pigp	HANDPHALANGES1	HANDPHALANGES3
ENSMUSG00000034324	684.605	1.04885	0.234421	4.47422	7.66923e-06	9.39955e-05	Tmem132c	HANDPHALANGES1	HANDPHALANGES3
ENSMUSG00000025370	21.4967	3.67418	0.821317	4.47352	7.69436e-06	9.42453e-05	Cdh9	HANDPHALANGES1	HANDPHALANGES3
ENSMUSG00000075229	415.13	-0.71802	0.160512	-4.47332	7.70151e-06	9.42746e-05	Mix23	HANDPHALANGES1	HANDPHALANGES3
ENSMUSG00000029149	139.271	-1.34719	0.301404	-4.46971	7.83244e-06	9.57593e-05	Krtcap3	HANDPHALANGES1	HANDPHALANGES3
ENSMUSG00000034164	573.232	-0.621018	0.139052	-4.46608	7.96675e-06	9.7162e-05	Emid1	HANDPHALANGES1	HANDPHALANGES3
ENSMUSG00000004565	683.168	0.62647	0.140303	4.46512	8.00232e-06	9.74762e-05	Pnpla6	HANDPHALANGES1	HANDPHALANGES3
ENSMUSG00000038418	960.22	1.08601	0.243312	4.46343	8.06565e-06	9.81872e-05	Egr1	HANDPHALANGES1	HANDPHALANGES3
ENSMUSG00000040537	545.485	0.811021	0.181765	4.46193	8.12254e-06	9.88193e-05	Adam22	HANDPHALANGES1	HANDPHALANGES3
ENSMUSG00000048388	1040.16	0.704227	0.157896	4.46006	8.19348e-06	9.94995e-05	Fam171b	HANDPHALANGES1	HANDPHALANGES3
ENSMUSG00000063838	525.844	-0.752794	0.168871	-4.45781	8.28027e-06	0.00010043	Cdc42ep5	HANDPHALANGES1	HANDPHALANGES3
ENSMUSG00000026011	97.2921	-1.36336	0.305908	-4.45676	8.32094e-06	0.000100739	Ctla4	HANDPHALANGES1	HANDPHALANGES3
ENSMUSG00000027245	1014.74	-0.701272	0.157494	-4.45269	8.48007e-06	0.000102541	Hypk	HANDPHALANGES1	HANDPHALANGES3
ENSMUSG00000021306	387.393	0.937097	0.210489	4.45201	8.50721e-06	0.000102806	Gpr137b	HANDPHALANGES1	HANDPHALANGES3
ENSMUSG00000020898	1303.83	0.778189	0.174802	4.45182	8.51446e-06	0.000102831	Ctc1	HANDPHALANGES1	HANDPHALANGES3
ENSMUSG00000003355	475.294	-0.652062	0.146534	-4.44989	8.59129e-06	0.000103696	Fkbp11	HANDPHALANGES1	HANDPHALANGES3
ENSMUSG00000081049	35.4192	-2.11742	0.475866	-4.44962	8.60235e-06	0.000103766	Rps24-ps3	HANDPHALANGES1	HANDPHALANGES3
ENSMUSG00000029715	407.859	-0.746731	0.167846	-4.44892	8.63051e-06	0.000104043	Pop7	HANDPHALANGES1	HANDPHALANGES3
ENSMUSG00000024687	1681.91	0.615342	0.138332	4.44832	8.65465e-06	0.000104271	Osbp	HANDPHALANGES1	HANDPHALANGES3
ENSMUSG00000028443	372.777	-0.797839	0.179367	-4.44808	8.66428e-06	0.000104323	Nudt2	HANDPHALANGES1	HANDPHALANGES3
ENSMUSG00000087413	154.553	-1.13636	0.255488	-4.44782	8.67476e-06	0.000104386	Gm11266	HANDPHALANGES1	HANDPHALANGES3
ENSMUSG00000019880	753.629	0.634304	0.142642	4.44683	8.71482e-06	0.000104678	Rspo3	HANDPHALANGES1	HANDPHALANGES3
ENSMUSG00000003233	1411.37	0.632931	0.142458	4.44292	8.87465e-06	0.000106276	Dvl3	HANDPHALANGES1	HANDPHALANGES3
ENSMUSG00000046449	283	0.932371	0.210041	4.43899	9.03801e-06	0.000108102	Nexmif	HANDPHALANGES1	HANDPHALANGES3
ENSMUSG00000009733	655.924	0.583665	0.131512	4.43813	9.07457e-06	0.000108421	Tfcp2	HANDPHALANGES1	HANDPHALANGES3
ENSMUSG00000039481	842.466	-0.952231	0.214579	-4.43766	9.09408e-06	0.000108577	Nrtn	HANDPHALANGES1	HANDPHALANGES3
ENSMUSG00000053559	109.15	-1.51525	0.341739	-4.43394	9.25268e-06	0.000110338	Smagp	HANDPHALANGES1	HANDPHALANGES3
ENSMUSG00000044641	163.689	1.08608	0.24514	4.43045	9.40368e-06	0.000112004	Pard6b	HANDPHALANGES1	HANDPHALANGES3
ENSMUSG00000029465	1313.55	-0.685715	0.154809	-4.42943	9.44844e-06	0.000112402	Arpc3	HANDPHALANGES1	HANDPHALANGES3
ENSMUSG00000024169	571.522	0.808266	0.182554	4.42756	9.53061e-06	0.000113311	Ift140	HANDPHALANGES1	HANDPHALANGES3
ENSMUSG00000025234	1240.55	0.70239	0.158654	4.42719	9.54689e-06	0.000113437	Arih1	HANDPHALANGES1	HANDPHALANGES3
ENSMUSG00000022361	1030.55	0.584809	0.132331	4.4193	9.902e-06	0.000117446	Zhx1	HANDPHALANGES1	HANDPHALANGES3
ENSMUSG00000045871	756.075	1.73144	0.391879	4.41831	9.94742e-06	0.000117914	Slitrk6	HANDPHALANGES1	HANDPHALANGES3
ENSMUSG00000003810	1092.91	0.619301	0.14019	4.41759	9.98061e-06	0.000118096	Mast2	HANDPHALANGES1	HANDPHALANGES3
ENSMUSG00000035357	731.319	0.748362	0.169529	4.41437	1.01306e-05	0.000119799	Pdzrn3	HANDPHALANGES1	HANDPHALANGES3
ENSMUSG00000114036	212.804	-1.17568	0.26635	-4.41405	1.01454e-05	0.000119903	Gm48228	HANDPHALANGES1	HANDPHALANGES3
ENSMUSG00000040560	430.66	0.92075	0.20868	4.41227	1.02294e-05	0.000120752	Wdr7	HANDPHALANGES1	HANDPHALANGES3
ENSMUSG00000062456	168.952	-1.11018	0.251786	-4.40922	1.03742e-05	0.00012221	Rpl9-ps6	HANDPHALANGES1	HANDPHALANGES3
ENSMUSG00000012640	720.278	0.807779	0.183268	4.40763	1.04508e-05	0.000122824	Zfp715	HANDPHALANGES1	HANDPHALANGES3
ENSMUSG00000026062	19.7166	-3.81552	0.865907	-4.40639	1.05109e-05	0.000123415	Slc9a2	HANDPHALANGES1	HANDPHALANGES3
ENSMUSG00000037857	1639.43	0.708962	0.160988	4.40382	1.06361e-05	0.000124664	Nufip2	HANDPHALANGES1	HANDPHALANGES3
ENSMUSG00000069919	87153.8	-1.9715	0.448078	-4.3999	1.08299e-05	0.000126636	Hba-a1	HANDPHALANGES1	HANDPHALANGES3
ENSMUSG00000074210	253.236	-0.835976	0.190023	-4.39934	1.08578e-05	0.000126888	NA	HANDPHALANGES1	HANDPHALANGES3
ENSMUSG00000021892	1069.03	0.588401	0.133751	4.39921	1.08644e-05	0.00012689	Sh3bp5	HANDPHALANGES1	HANDPHALANGES3
ENSMUSG00000025226	155.799	-0.936716	0.212976	-4.39823	1.09139e-05	0.000127255	Fbxl15	HANDPHALANGES1	HANDPHALANGES3
ENSMUSG00000009076	389.073	-0.869834	0.197784	-4.3979	1.09306e-05	0.000127363	Zmat5	HANDPHALANGES1	HANDPHALANGES3
ENSMUSG00000039662	905.939	0.919724	0.209149	4.39746	1.09524e-05	0.000127542	Icmt	HANDPHALANGES1	HANDPHALANGES3
ENSMUSG00000019710	1115.84	-0.629741	0.143228	-4.39676	1.0988e-05	0.000127882	Mrpl24	HANDPHALANGES1	HANDPHALANGES3
ENSMUSG00000041827	7.0849	6.00866	1.36737	4.39432	1.11121e-05	0.000129251	Oasl1	HANDPHALANGES1	HANDPHALANGES3
ENSMUSG00000028445	219.072	-1.10087	0.250532	-4.39411	1.11226e-05	0.000129296	Enho	HANDPHALANGES1	HANDPHALANGES3
ENSMUSG00000020955	337.985	-0.674048	0.153427	-4.39328	1.11652e-05	0.000129716	Ap4s1	HANDPHALANGES1	HANDPHALANGES3
ENSMUSG00000005374	1484.03	0.621768	0.14155	4.39255	1.12026e-05	0.000130075	Tbl2	HANDPHALANGES1	HANDPHALANGES3
ENSMUSG00000054453	19.9984	4.01477	0.91408	4.39214	1.1224e-05	0.000130171	Sytl5	HANDPHALANGES1	HANDPHALANGES3
ENSMUSG00000025481	52.136	-3.34069	0.760841	-4.39078	1.12944e-05	0.000130834	Urah	HANDPHALANGES1	HANDPHALANGES3
ENSMUSG00000031351	705.262	1.02053	0.232767	4.38432	1.16348e-05	0.000134542	Zfp185	HANDPHALANGES1	HANDPHALANGES3
ENSMUSG00000000359	118.125	-1.24682	0.284411	-4.38387	1.16591e-05	0.000134744	Rem1	HANDPHALANGES1	HANDPHALANGES3
ENSMUSG00000079197	2258.17	-0.591757	0.135002	-4.38331	1.16892e-05	0.000135014	Psme2	HANDPHALANGES1	HANDPHALANGES3
ENSMUSG00000120664	47.8666	-1.57718	0.359848	-4.38292	1.17101e-05	0.000135098	Gm56688	HANDPHALANGES1	HANDPHALANGES3
ENSMUSG00000074345	222.461	1.32393	0.30225	4.38026	1.18537e-05	0.000136596	Tnfaip8l3	HANDPHALANGES1	HANDPHALANGES3
ENSMUSG00000025135	1283.05	-0.782455	0.178762	-4.37707	1.20287e-05	0.000138372	Anapc11	HANDPHALANGES1	HANDPHALANGES3
ENSMUSG00000091957	7182.57	-0.585693	0.133841	-4.37603	1.2086e-05	0.00013895	Rps2-ps10	HANDPHALANGES1	HANDPHALANGES3
ENSMUSG00000024177	991.842	-0.652601	0.149142	-4.37571	1.2104e-05	0.000139077	Nme4	HANDPHALANGES1	HANDPHALANGES3
ENSMUSG00000027596	33.1285	2.23617	0.511099	4.37523	1.21307e-05	0.000139303	a	HANDPHALANGES1	HANDPHALANGES3
ENSMUSG00000039115	945.17	0.746348	0.170618	4.37439	1.21773e-05	0.000139627	Itga9	HANDPHALANGES1	HANDPHALANGES3
ENSMUSG00000024558	128.481	1.66897	0.381746	4.37194	1.23145e-05	0.00014093	Mapk4	HANDPHALANGES1	HANDPHALANGES3
ENSMUSG00000027602	1030.96	-0.622295	0.142339	-4.37194	1.2315e-05	0.00014093	Map1lc3a	HANDPHALANGES1	HANDPHALANGES3
ENSMUSG00000024697	261.1	-0.929953	0.212783	-4.37043	1.24002e-05	0.000141824	Gna14	HANDPHALANGES1	HANDPHALANGES3
ENSMUSG00000052248	38.1105	-1.69858	0.388665	-4.3703	1.24073e-05	0.000141824	Zeb2os	HANDPHALANGES1	HANDPHALANGES3
ENSMUSG00000035545	2285.68	0.749884	0.171682	4.36786	1.25469e-05	0.000143254	Leng8	HANDPHALANGES1	HANDPHALANGES3
ENSMUSG00000059554	272.36	-0.763996	0.174946	-4.36705	1.25938e-05	0.000143624	Ccdc28a	HANDPHALANGES1	HANDPHALANGES3
ENSMUSG00000022112	20.4658	3.68989	0.846384	4.35959	1.30305e-05	0.000148264	Gpc5	HANDPHALANGES1	HANDPHALANGES3
ENSMUSG00000096942	85.2216	-1.24053	0.284696	-4.35737	1.31637e-05	0.000149694	Rps19-ps6	HANDPHALANGES1	HANDPHALANGES3
ENSMUSG00000055980	839.253	0.639332	0.146762	4.35624	1.32315e-05	0.000150378	Irs1	HANDPHALANGES1	HANDPHALANGES3
ENSMUSG00000070713	2240.55	-0.621533	0.142753	-4.3539	1.3374e-05	0.000151737	Hmgn2-ps	HANDPHALANGES1	HANDPHALANGES3
ENSMUSG00000039478	169.148	-0.866869	0.199172	-4.35237	1.34673e-05	0.000152646	Micu3	HANDPHALANGES1	HANDPHALANGES3
ENSMUSG00000058443	346.563	-0.902912	0.207455	-4.35234	1.34694e-05	0.000152646	Rpl10-ps3	HANDPHALANGES1	HANDPHALANGES3
ENSMUSG00000030612	600.131	-0.690455	0.158728	-4.34993	1.36184e-05	0.000154246	Mrpl46	HANDPHALANGES1	HANDPHALANGES3
ENSMUSG00000011171	232.599	1.16718	0.268443	4.34796	1.37412e-05	0.000155371	Vipr2	HANDPHALANGES1	HANDPHALANGES3
ENSMUSG00000039347	102.797	1.79734	0.413648	4.3451	1.39215e-05	0.000157231	Atp6v0e2	HANDPHALANGES1	HANDPHALANGES3
ENSMUSG00000062515	54.2056	-2.09368	0.481907	-4.34457	1.39548e-05	0.000157517	Fabp4	HANDPHALANGES1	HANDPHALANGES3
ENSMUSG00000032594	4022.69	0.601173	0.138437	4.34257	1.40827e-05	0.000158735	Ip6k1	HANDPHALANGES1	HANDPHALANGES3
ENSMUSG00000003190	346.145	-0.590986	0.136156	-4.34051	1.42155e-05	0.000160016	Bcl2l12	HANDPHALANGES1	HANDPHALANGES3
ENSMUSG00000021102	1479.02	-0.60137	0.138594	-4.33907	1.43087e-05	0.000160962	Glrx5	HANDPHALANGES1	HANDPHALANGES3
ENSMUSG00000120362	130.24	-0.881339	0.203177	-4.33778	1.43926e-05	0.000161675	2810449D17Rik	HANDPHALANGES1	HANDPHALANGES3
ENSMUSG00000036264	109.618	4.82512	1.11247	4.3373	1.44245e-05	0.000161807	Fstl4	HANDPHALANGES1	HANDPHALANGES3
ENSMUSG00000087249	103.463	-1.18442	0.273394	-4.33229	1.47566e-05	0.000165181	Gm16062	HANDPHALANGES1	HANDPHALANGES3
ENSMUSG00000111394	183.779	1.07242	0.247543	4.33226	1.47585e-05	0.000165181	Gm49759	HANDPHALANGES1	HANDPHALANGES3
ENSMUSG00000070343	136.202	-1.28174	0.29591	-4.33154	1.48072e-05	0.000165539	Gm10288	HANDPHALANGES1	HANDPHALANGES3
ENSMUSG00000032384	521.425	0.597379	0.138099	4.32573	1.52031e-05	0.000169488	Csnk1g1	HANDPHALANGES1	HANDPHALANGES3
ENSMUSG00000038605	200.469	1.06932	0.2472	4.32575	1.52016e-05	0.000169488	Samd10	HANDPHALANGES1	HANDPHALANGES3
ENSMUSG00000085139	6.64986	5.74256	1.32748	4.3259	1.51909e-05	0.000169488	Sertm2	HANDPHALANGES1	HANDPHALANGES3
ENSMUSG00000120936	92.6796	1.52295	0.352136	4.32488	1.52615e-05	0.000170043	9930105H17Rik	HANDPHALANGES1	HANDPHALANGES3
ENSMUSG00000027636	985.052	-0.65898	0.15245	-4.32259	1.5421e-05	0.000171723	Sla2	HANDPHALANGES1	HANDPHALANGES3
ENSMUSG00000051730	305.222	-0.628538	0.145427	-4.32203	1.54602e-05	0.000171968	Mettl5	HANDPHALANGES1	HANDPHALANGES3
ENSMUSG00000022032	873.609	0.680688	0.15756	4.32018	1.55902e-05	0.000173219	Scara5	HANDPHALANGES1	HANDPHALANGES3
ENSMUSG00000089706	82.2185	-1.12181	0.259793	-4.31807	1.57397e-05	0.000174296	B230216N24Rik	HANDPHALANGES1	HANDPHALANGES3
ENSMUSG00000032777	1184.04	0.616068	0.142688	4.3176	1.57736e-05	0.000174573	Gtf3c1	HANDPHALANGES1	HANDPHALANGES3
ENSMUSG00000113786	154.261	-1.29371	0.299698	-4.31673	1.58357e-05	0.000175164	Gm49384	HANDPHALANGES1	HANDPHALANGES3
ENSMUSG00000036529	807.296	0.630965	0.14618	4.31635	1.58632e-05	0.000175336	Sbf1	HANDPHALANGES1	HANDPHALANGES3
ENSMUSG00000029094	672.449	0.619019	0.143452	4.31517	1.59482e-05	0.000176031	Afap1	HANDPHALANGES1	HANDPHALANGES3
ENSMUSG00000105388	64.2756	-1.46093	0.338611	-4.31448	1.59981e-05	0.000176468	Rpl36a-ps2	HANDPHALANGES1	HANDPHALANGES3
ENSMUSG00000033737	108.564	1.32315	0.306704	4.3141	1.60258e-05	0.000176577	Fndc3c1	HANDPHALANGES1	HANDPHALANGES3
ENSMUSG00000054196	11662.1	-0.61179	0.14181	-4.31414	1.60227e-05	0.000176577	Cthrc1	HANDPHALANGES1	HANDPHALANGES3
ENSMUSG00000009585	225.903	-0.704437	0.163378	-4.31169	1.62009e-05	0.00017821	Apobec3	HANDPHALANGES1	HANDPHALANGES3
ENSMUSG00000058838	146.517	-1.65188	0.383115	-4.3117	1.62008e-05	0.00017821	Rps27a-ps2	HANDPHALANGES1	HANDPHALANGES3
ENSMUSG00000092607	505.713	-0.781864	0.181528	-4.30714	1.65381e-05	0.000181818	Scnm1	HANDPHALANGES1	HANDPHALANGES3
ENSMUSG00000052951	990.091	0.882306	0.204867	4.30672	1.6569e-05	0.000182057	C130021I20Rik	HANDPHALANGES1	HANDPHALANGES3
ENSMUSG00000034723	1062.97	0.792197	0.184082	4.3035	1.68122e-05	0.000184525	Tmx4	HANDPHALANGES1	HANDPHALANGES3
ENSMUSG00000024173	75.1932	-2.45882	0.57138	-4.3033	1.68276e-05	0.000184593	Tpsab1	HANDPHALANGES1	HANDPHALANGES3
ENSMUSG00000017756	1045.28	0.732747	0.170333	4.30185	1.69376e-05	0.000185696	Slc12a7	HANDPHALANGES1	HANDPHALANGES3
ENSMUSG00000054426	158.195	-1.09066	0.253578	-4.30106	1.69983e-05	0.000186156	A930005H10Rik	HANDPHALANGES1	HANDPHALANGES3
ENSMUSG00000035268	693.476	-0.620524	0.144338	-4.29911	1.71487e-05	0.0001877	Pkig	HANDPHALANGES1	HANDPHALANGES3
ENSMUSG00000036977	623.208	-0.595519	0.138538	-4.29859	1.71892e-05	0.000188039	Anapc10	HANDPHALANGES1	HANDPHALANGES3
ENSMUSG00000066553	116.123	-1.30482	0.303722	-4.29611	1.73823e-05	0.000189943	Gm6969	HANDPHALANGES1	HANDPHALANGES3
ENSMUSG00000031239	43333.2	-0.590013	0.137497	-4.29111	1.77784e-05	0.000194057	Itm2a	HANDPHALANGES1	HANDPHALANGES3
ENSMUSG00000025986	2235.37	0.690279	0.160882	4.29059	1.78196e-05	0.0001944	Slc39a10	HANDPHALANGES1	HANDPHALANGES3
ENSMUSG00000118662	496.547	0.585564	0.136529	4.28894	1.79531e-05	0.000195641	Tctn2	HANDPHALANGES1	HANDPHALANGES3
ENSMUSG00000062611	337.125	-0.868383	0.202502	-4.28828	1.80064e-05	0.000196008	Rps3a2	HANDPHALANGES1	HANDPHALANGES3
ENSMUSG00000028549	228.762	-0.699094	0.163045	-4.28774	1.80502e-05	0.000196376	Itgb3bp	HANDPHALANGES1	HANDPHALANGES3
ENSMUSG00000058290	450.417	0.832325	0.194141	4.28721	1.80929e-05	0.000196733	Espl1	HANDPHALANGES1	HANDPHALANGES3
ENSMUSG00000036661	238.286	0.826379	0.192854	4.285	1.82738e-05	0.000198591	Dennd3	HANDPHALANGES1	HANDPHALANGES3
ENSMUSG00000008153	510.777	0.60129	0.140333	4.28474	1.82953e-05	0.000198621	Clstn3	HANDPHALANGES1	HANDPHALANGES3
ENSMUSG00000030611	632.82	-0.762051	0.177853	-4.28473	1.82965e-05	0.000198621	Mrps11	HANDPHALANGES1	HANDPHALANGES3
ENSMUSG00000055540	39.2827	3.13676	0.732143	4.28436	1.83269e-05	0.000198842	Epha6	HANDPHALANGES1	HANDPHALANGES3
ENSMUSG00000047446	1376.45	-0.650662	0.151957	-4.28187	1.85325e-05	0.000200853	Arl4a	HANDPHALANGES1	HANDPHALANGES3
ENSMUSG00000039621	622.913	0.850897	0.198753	4.28118	1.85905e-05	0.000201152	Prex1	HANDPHALANGES1	HANDPHALANGES3
ENSMUSG00000025035	674.134	-0.680608	0.159027	-4.27983	1.87036e-05	0.000202155	Arl3	HANDPHALANGES1	HANDPHALANGES3
ENSMUSG00000029778	16.973	4.85494	1.1347	4.27863	1.88047e-05	0.000203004	Adcyap1r1	HANDPHALANGES1	HANDPHALANGES3
ENSMUSG00000026904	47.9098	2.81986	0.659189	4.27777	1.88772e-05	0.000203478	Slc4a10	HANDPHALANGES1	HANDPHALANGES3
ENSMUSG00000020801	628.566	-0.643299	0.150466	-4.27537	1.9082e-05	0.00020524	Med31	HANDPHALANGES1	HANDPHALANGES3
ENSMUSG00000102212	40.4452	1.98105	0.463384	4.27518	1.90981e-05	0.000205302	C230085N15Rik	HANDPHALANGES1	HANDPHALANGES3
ENSMUSG00000027679	950.247	-0.616488	0.144329	-4.27141	1.9424e-05	0.000208129	Dnajc19	HANDPHALANGES1	HANDPHALANGES3
ENSMUSG00000033377	308	-1.03759	0.243001	-4.26991	1.95553e-05	0.000209085	Palmd	HANDPHALANGES1	HANDPHALANGES3
ENSMUSG00000032936	332.575	0.836569	0.195987	4.2685	1.96795e-05	0.000210073	Camkv	HANDPHALANGES1	HANDPHALANGES3
ENSMUSG00000043183	710.642	0.89863	0.210525	4.26852	1.96776e-05	0.000210073	Simc1	HANDPHALANGES1	HANDPHALANGES3
ENSMUSG00000024807	968.495	0.587705	0.137715	4.26754	1.97638e-05	0.00021086	Syvn1	HANDPHALANGES1	HANDPHALANGES3
ENSMUSG00000040280	167.231	-1.70898	0.400519	-4.26691	1.98196e-05	0.000211228	Ndufa4l2	HANDPHALANGES1	HANDPHALANGES3
ENSMUSG00000026213	830.377	0.59581	0.13969	4.26522	1.99709e-05	0.000212726	Stk11ip	HANDPHALANGES1	HANDPHALANGES3
ENSMUSG00000042569	771.797	-0.645715	0.151451	-4.26353	2.01224e-05	0.000214226	Dhrs7b	HANDPHALANGES1	HANDPHALANGES3
ENSMUSG00000025583	556.824	0.677226	0.158852	4.26324	2.01481e-05	0.000214384	Rptor	HANDPHALANGES1	HANDPHALANGES3
ENSMUSG00000038402	834.424	0.720307	0.169117	4.25924	2.05126e-05	0.000217912	Foxf2	HANDPHALANGES1	HANDPHALANGES3
ENSMUSG00000063171	923.744	-0.700571	0.164475	-4.25945	2.04934e-05	0.000217912	Rps4l	HANDPHALANGES1	HANDPHALANGES3
ENSMUSG00000026568	1178.78	-0.723161	0.16986	-4.25738	2.06832e-05	0.00021949	Mpc2	HANDPHALANGES1	HANDPHALANGES3
ENSMUSG00000028480	716.137	-0.605268	0.142187	-4.25684	2.07339e-05	0.00021991	Glipr2	HANDPHALANGES1	HANDPHALANGES3
ENSMUSG00000089847	975.996	-0.676753	0.15903	-4.2555	2.08583e-05	0.000220875	Timm10b	HANDPHALANGES1	HANDPHALANGES3
ENSMUSG00000022076	7.80973	5.32651	1.25238	4.25311	2.10819e-05	0.000223005	Klhl1	HANDPHALANGES1	HANDPHALANGES3
ENSMUSG00000028995	1295.34	0.637828	0.150022	4.25155	2.12294e-05	0.000224446	Hycc1	HANDPHALANGES1	HANDPHALANGES3
ENSMUSG00000044807	2799.29	0.61359	0.144372	4.25008	2.13694e-05	0.000225806	Zfp354c	HANDPHALANGES1	HANDPHALANGES3
ENSMUSG00000044468	352.426	-0.892833	0.210142	-4.24871	2.15001e-05	0.000226825	Tent5c	HANDPHALANGES1	HANDPHALANGES3
ENSMUSG00000039086	295.304	1.01432	0.238821	4.2472	2.16461e-05	0.00022788	Ss18l1	HANDPHALANGES1	HANDPHALANGES3
ENSMUSG00000036281	525.256	0.725486	0.170824	4.24697	2.16682e-05	0.000227993	Snapc4	HANDPHALANGES1	HANDPHALANGES3
ENSMUSG00000022270	204.637	-0.895344	0.210849	-4.24637	2.17265e-05	0.000228364	Retreg1	HANDPHALANGES1	HANDPHALANGES3
ENSMUSG00000104208	846.569	-0.591509	0.139298	-4.24637	2.17262e-05	0.000228364	Gm37401	HANDPHALANGES1	HANDPHALANGES3
ENSMUSG00000049106	1128.61	0.659983	0.155469	4.24511	2.18486e-05	0.000229526	Dcaf5	HANDPHALANGES1	HANDPHALANGES3
ENSMUSG00000029821	431.196	0.605477	0.142643	4.24469	2.18895e-05	0.000229713	Gsdme	HANDPHALANGES1	HANDPHALANGES3
ENSMUSG00000046721	120.3	-1.04696	0.246704	-4.24382	2.19751e-05	0.000230489	Rpl14-ps1	HANDPHALANGES1	HANDPHALANGES3
ENSMUSG00000015013	652.194	-0.699879	0.164943	-4.24315	2.20407e-05	0.000231055	Trappc2l	HANDPHALANGES1	HANDPHALANGES3
ENSMUSG00000013822	1186.9	-0.642946	0.151553	-4.2424	2.21142e-05	0.000231703	Elof1	HANDPHALANGES1	HANDPHALANGES3
ENSMUSG00000097772	240.848	-0.637767	0.15035	-4.2419	2.21639e-05	0.000232101	5430416N02Rik	HANDPHALANGES1	HANDPHALANGES3
ENSMUSG00000091264	1047.94	0.637291	0.150315	4.23971	2.23808e-05	0.000234126	Smim13	HANDPHALANGES1	HANDPHALANGES3
ENSMUSG00000074158	192.066	0.921813	0.217536	4.23751	2.26008e-05	0.000236054	Zfp976	HANDPHALANGES1	HANDPHALANGES3
ENSMUSG00000096255	585.354	-0.659434	0.155681	-4.2358	2.27743e-05	0.000237367	Dynlt1b	HANDPHALANGES1	HANDPHALANGES3
ENSMUSG00000022178	1701.77	0.593281	0.140089	4.23502	2.28527e-05	0.000237934	Ajuba	HANDPHALANGES1	HANDPHALANGES3
ENSMUSG00000030672	94.9442	-1.38565	0.327224	-4.23456	2.28999e-05	0.0002383	Mylpf	HANDPHALANGES1	HANDPHALANGES3
ENSMUSG00000107561	93.6494	-1.12159	0.264903	-4.23397	2.29606e-05	0.000238807	Gm44264	HANDPHALANGES1	HANDPHALANGES3
ENSMUSG00000050299	41.5451	-1.87679	0.443392	-4.23281	2.30787e-05	0.000239909	Gm9843	HANDPHALANGES1	HANDPHALANGES3
ENSMUSG00000037995	513.763	1.06155	0.250937	4.23033	2.33348e-05	0.000242318	Igsf9	HANDPHALANGES1	HANDPHALANGES3
ENSMUSG00000028433	1775.78	0.611644	0.144606	4.22972	2.3398e-05	0.000242847	Ubap2	HANDPHALANGES1	HANDPHALANGES3
ENSMUSG00000048833	985.837	0.790788	0.186986	4.22913	2.34592e-05	0.000243356	Slc39a9	HANDPHALANGES1	HANDPHALANGES3
ENSMUSG00000078903	110.799	1.4382	0.340139	4.22827	2.35496e-05	0.000244165	Gm14391	HANDPHALANGES1	HANDPHALANGES3
ENSMUSG00000085241	216.936	-0.864056	0.204487	-4.22547	2.38439e-05	0.000246959	Snhg3	HANDPHALANGES1	HANDPHALANGES3
ENSMUSG00000106864	2856.34	0.584805	0.138448	4.22399	2.40011e-05	0.000248199	Gtf3c2	HANDPHALANGES1	HANDPHALANGES3
ENSMUSG00000021130	119.703	1.22782	0.290788	4.22239	2.41725e-05	0.000249841	Galnt16	HANDPHALANGES1	HANDPHALANGES3
ENSMUSG00000000131	2004.65	0.599036	0.14188	4.22213	2.42001e-05	0.0002499	Xpo6	HANDPHALANGES1	HANDPHALANGES3
ENSMUSG00000007097	248.386	0.943983	0.223581	4.2221	2.42034e-05	0.0002499	Atp1a2	HANDPHALANGES1	HANDPHALANGES3
ENSMUSG00000029535	615.637	-0.637609	0.151122	-4.21916	2.45211e-05	0.000253049	Triap1	HANDPHALANGES1	HANDPHALANGES3
ENSMUSG00000058773	74.6336	-1.14723	0.27193	-4.21885	2.45552e-05	0.000253269	H1f5	HANDPHALANGES1	HANDPHALANGES3
ENSMUSG00000005251	176.911	-3.8094	0.903334	-4.21705	2.47519e-05	0.000255033	Ripk4	HANDPHALANGES1	HANDPHALANGES3
ENSMUSG00000081984	105.395	-1.29775	0.307887	-4.21503	2.49749e-05	0.000257064	Dnajb3	HANDPHALANGES1	HANDPHALANGES3
ENSMUSG00000025909	7.49636	5.39263	1.27995	4.21316	2.51822e-05	0.000258929	Sntg1	HANDPHALANGES1	HANDPHALANGES3
ENSMUSG00000029577	1762.82	0.622123	0.147713	4.21171	2.5344e-05	0.000260056	Ube3b	HANDPHALANGES1	HANDPHALANGES3
ENSMUSG00000031283	601.926	0.806416	0.19147	4.21171	2.53442e-05	0.000260056	Chrdl1	HANDPHALANGES1	HANDPHALANGES3
ENSMUSG00000060962	1081.84	-3.79052	0.900032	-4.21154	2.53634e-05	0.000260119	Dmkn	HANDPHALANGES1	HANDPHALANGES3
ENSMUSG00000030806	243.992	0.792434	0.188254	4.20939	2.56066e-05	0.000262477	Stx1b	HANDPHALANGES1	HANDPHALANGES3
ENSMUSG00000041720	842.374	0.709826	0.168768	4.20592	2.60022e-05	0.000266395	Pi4ka	HANDPHALANGES1	HANDPHALANGES3
ENSMUSG00000059355	710.545	-0.623147	0.148189	-4.20508	2.60994e-05	0.000267253	Wdr83os	HANDPHALANGES1	HANDPHALANGES3
ENSMUSG00000051427	638.507	0.799247	0.190201	4.20213	2.64416e-05	0.000270617	Ccdc157	HANDPHALANGES1	HANDPHALANGES3
ENSMUSG00000039145	196.651	1.27579	0.30369	4.20097	2.65774e-05	0.000271727	Camk1d	HANDPHALANGES1	HANDPHALANGES3
ENSMUSG00000001156	737.815	0.628704	0.149728	4.19897	2.68136e-05	0.00027386	Mxd1	HANDPHALANGES1	HANDPHALANGES3
ENSMUSG00000078570	690.098	-0.742104	0.176744	-4.19876	2.68381e-05	0.000273969	1110065P20Rik	HANDPHALANGES1	HANDPHALANGES3
ENSMUSG00000051351	761.851	0.612235	0.145845	4.19786	2.69448e-05	0.000274727	Zfp46	HANDPHALANGES1	HANDPHALANGES3
ENSMUSG00000109336	1263.95	0.621499	0.148054	4.19779	2.69538e-05	0.000274727	Samd4b	HANDPHALANGES1	HANDPHALANGES3
ENSMUSG00000029033	718.239	0.598156	0.142539	4.19644	2.71138e-05	0.000276215	Acap3	HANDPHALANGES1	HANDPHALANGES3
ENSMUSG00000023960	1169.64	0.659584	0.157219	4.19532	2.72483e-05	0.000277302	Enpp5	HANDPHALANGES1	HANDPHALANGES3
ENSMUSG00000009035	2681.97	0.65025	0.155015	4.19474	2.73179e-05	0.000277867	Tmem184b	HANDPHALANGES1	HANDPHALANGES3
ENSMUSG00000032313	108.28	1.28373	0.306065	4.19432	2.73696e-05	0.000277966	Tmem266	HANDPHALANGES1	HANDPHALANGES3
ENSMUSG00000037466	450.793	0.580024	0.138286	4.19439	2.73609e-05	0.000277966	Tedc1	HANDPHALANGES1	HANDPHALANGES3
ENSMUSG00000035443	925.662	-0.613975	0.146418	-4.19331	2.74914e-05	0.000278918	Thyn1	HANDPHALANGES1	HANDPHALANGES3
ENSMUSG00000045237	557.645	-0.632238	0.150881	-4.19032	2.78564e-05	0.000282449	Eola1	HANDPHALANGES1	HANDPHALANGES3
ENSMUSG00000028300	522.891	0.606829	0.144838	4.1897	2.79321e-05	0.000282666	C9orf72	HANDPHALANGES1	HANDPHALANGES3
ENSMUSG00000074968	34.2429	3.41575	0.815238	4.18987	2.79108e-05	0.000282666	Ano3	HANDPHALANGES1	HANDPHALANGES3
ENSMUSG00000103749	171.876	1.26462	0.301933	4.18842	2.80906e-05	0.000284126	Pcdhgb5	HANDPHALANGES1	HANDPHALANGES3
ENSMUSG00000047248	597.484	0.833241	0.199068	4.18571	2.84273e-05	0.000287093	C2cd3	HANDPHALANGES1	HANDPHALANGES3
ENSMUSG00000025208	745.372	-0.679821	0.162471	-4.18426	2.86098e-05	0.000288789	Mrpl43	HANDPHALANGES1	HANDPHALANGES3
ENSMUSG00000020386	1328.39	-0.615806	0.147184	-4.18393	2.86515e-05	0.000289063	Sar1b	HANDPHALANGES1	HANDPHALANGES3
ENSMUSG00000057751	1750.97	0.683742	0.163449	4.1832	2.87433e-05	0.000289841	Megf6	HANDPHALANGES1	HANDPHALANGES3
ENSMUSG00000035472	14.32	-4.06308	0.971925	-4.18045	2.90932e-05	0.000293221	Slc25a21	HANDPHALANGES1	HANDPHALANGES3
ENSMUSG00000032363	493.824	0.750477	0.179574	4.17921	2.92529e-05	0.000294532	Adamts7	HANDPHALANGES1	HANDPHALANGES3
ENSMUSG00000022935	57.5285	2.74701	0.657438	4.17835	2.93631e-05	0.000295491	Grik1	HANDPHALANGES1	HANDPHALANGES3
ENSMUSG00000035278	663.503	-0.587198	0.140545	-4.178	2.94082e-05	0.000295795	Plekhj1	HANDPHALANGES1	HANDPHALANGES3
ENSMUSG00000020153	1813.9	-0.598694	0.143369	-4.17589	2.96824e-05	0.000298315	Ndufs7	HANDPHALANGES1	HANDPHALANGES3
ENSMUSG00000075700	298.018	-0.781885	0.18725	-4.17563	2.97168e-05	0.000298446	Selenot	HANDPHALANGES1	HANDPHALANGES3
ENSMUSG00000090136	221.206	-0.990137	0.237225	-4.17384	2.99511e-05	0.000300495	Gm10177	HANDPHALANGES1	HANDPHALANGES3
ENSMUSG00000105326	43.6916	-1.83613	0.439967	-4.17334	3.00163e-05	0.000300996	6030400A10Rik	HANDPHALANGES1	HANDPHALANGES3
ENSMUSG00000069917	41645.7	-1.81905	0.436025	-4.1719	3.02076e-05	0.00030276	Hba-a2	HANDPHALANGES1	HANDPHALANGES3
ENSMUSG00000047842	28.9643	3.37421	0.809169	4.16997	3.04635e-05	0.000304865	Diras2	HANDPHALANGES1	HANDPHALANGES3
ENSMUSG00000073434	601.44	1.19085	0.285646	4.16899	3.05951e-05	0.000305874	Wdr90	HANDPHALANGES1	HANDPHALANGES3
ENSMUSG00000026895	1416.12	-0.589495	0.141425	-4.16826	3.06933e-05	0.000306701	Ndufa8	HANDPHALANGES1	HANDPHALANGES3
ENSMUSG00000029059	380.292	-0.70457	0.169171	-4.16483	3.11583e-05	0.000310723	Prxl2b	HANDPHALANGES1	HANDPHALANGES3
ENSMUSG00000036114	554.68	-0.690739	0.165905	-4.16346	3.13461e-05	0.000312438	Rpp25l	HANDPHALANGES1	HANDPHALANGES3
ENSMUSG00000120250	348.15	-0.704547	0.169313	-4.16123	3.16545e-05	0.000315354	2010004M13Rik	HANDPHALANGES1	HANDPHALANGES3
ENSMUSG00000075478	13.9861	3.58243	0.861134	4.16013	3.1806e-05	0.000316705	Slitrk1	HANDPHALANGES1	HANDPHALANGES3
ENSMUSG00000060675	253.353	-1.22563	0.294732	-4.15845	3.20414e-05	0.000318728	Plaat3	HANDPHALANGES1	HANDPHALANGES3
ENSMUSG00000054469	341	0.874016	0.210195	4.15811	3.20888e-05	0.00031904	Lclat1	HANDPHALANGES1	HANDPHALANGES3
ENSMUSG00000074577	249.348	0.698787	0.168099	4.15699	3.22474e-05	0.000320296	Ripor3	HANDPHALANGES1	HANDPHALANGES3
ENSMUSG00000025272	1482.1	0.587849	0.141522	4.15377	3.27044e-05	0.000324221	Tro	HANDPHALANGES1	HANDPHALANGES3
ENSMUSG00000056073	74.7966	1.41293	0.340158	4.15374	3.27079e-05	0.000324221	Grik2	HANDPHALANGES1	HANDPHALANGES3
ENSMUSG00000025733	575.656	0.821944	0.197914	4.15303	3.28098e-05	0.000325069	Rhot2	HANDPHALANGES1	HANDPHALANGES3
ENSMUSG00000103081	182.771	0.873782	0.210412	4.15272	3.28549e-05	0.000325271	Pcdhgb8	HANDPHALANGES1	HANDPHALANGES3
ENSMUSG00000026587	68.6775	1.76988	0.426292	4.1518	3.29876e-05	0.000326342	Astn1	HANDPHALANGES1	HANDPHALANGES3
ENSMUSG00000027889	1335.95	0.681617	0.164323	4.14802	3.35359e-05	0.000331602	Ampd2	HANDPHALANGES1	HANDPHALANGES3
ENSMUSG00000007836	612.999	-0.891505	0.21497	-4.14711	3.367e-05	0.000332596	Hnrnpa0	HANDPHALANGES1	HANDPHALANGES3
ENSMUSG00000068101	393.813	-0.683729	0.16489	-4.14658	3.37474e-05	0.000333195	Cenpm	HANDPHALANGES1	HANDPHALANGES3
ENSMUSG00000052981	183.695	-0.919106	0.221804	-4.14378	3.41623e-05	0.000336956	Ube2ql1	HANDPHALANGES1	HANDPHALANGES3
ENSMUSG00000021911	1239.33	0.769721	0.185783	4.14311	3.42629e-05	0.000337781	Parg	HANDPHALANGES1	HANDPHALANGES3
ENSMUSG00000039092	193.703	-4.45103	1.0749	-4.14089	3.45958e-05	0.000340555	Sptlc3	HANDPHALANGES1	HANDPHALANGES3
ENSMUSG00000025082	233.586	0.845873	0.204312	4.1401	3.47151e-05	0.00034156	Vwa2	HANDPHALANGES1	HANDPHALANGES3
ENSMUSG00000026176	376.372	-0.799902	0.193286	-4.13843	3.4969e-05	0.000343745	Ctdsp1	HANDPHALANGES1	HANDPHALANGES3
ENSMUSG00000031807	1333.12	-0.625043	0.151035	-4.13841	3.49718e-05	0.000343745	Pgls	HANDPHALANGES1	HANDPHALANGES3
ENSMUSG00000028661	24.8202	3.80859	0.920398	4.13798	3.50377e-05	0.000344052	Epha8	HANDPHALANGES1	HANDPHALANGES3
ENSMUSG00000097445	193.607	-0.951989	0.23012	-4.13692	3.51998e-05	0.000345342	Gm26631	HANDPHALANGES1	HANDPHALANGES3
ENSMUSG00000057092	130.2	-1.18462	0.286389	-4.13639	3.52815e-05	0.000345763	Fxyd3	HANDPHALANGES1	HANDPHALANGES3
ENSMUSG00000039236	36.7524	-2.29553	0.555065	-4.13561	3.54011e-05	0.000346763	Isg20	HANDPHALANGES1	HANDPHALANGES3
ENSMUSG00000044550	603.922	-0.603471	0.146008	-4.13314	3.57848e-05	0.000349831	Tceal3	HANDPHALANGES1	HANDPHALANGES3
ENSMUSG00000026087	973.611	-0.634724	0.153604	-4.1322	3.593e-05	0.00035089	Mrpl30	HANDPHALANGES1	HANDPHALANGES3
ENSMUSG00000021947	1068.27	-0.612277	0.148191	-4.13167	3.60133e-05	0.000351373	Cryl1	HANDPHALANGES1	HANDPHALANGES3
ENSMUSG00000029408	384.588	-0.635115	0.153733	-4.13128	3.60745e-05	0.000351573	Abcb9	HANDPHALANGES1	HANDPHALANGES3
ENSMUSG00000051255	126.397	-1.03661	0.250911	-4.1314	3.60564e-05	0.000351573	Gm6563	HANDPHALANGES1	HANDPHALANGES3
ENSMUSG00000074280	208.674	-1.22133	0.295663	-4.13081	3.61483e-05	0.000351999	Gm6166	HANDPHALANGES1	HANDPHALANGES3
ENSMUSG00000003154	745.64	0.93513	0.226438	4.12974	3.63167e-05	0.000353291	Foxj2	HANDPHALANGES1	HANDPHALANGES3
ENSMUSG00000039959	1405.1	0.616159	0.149199	4.12979	3.631e-05	0.000353291	Hip1	HANDPHALANGES1	HANDPHALANGES3
ENSMUSG00000059058	21.2715	-2.17696	0.527231	-4.12905	3.64262e-05	0.000354183	Tma7-ps	HANDPHALANGES1	HANDPHALANGES3
ENSMUSG00000042895	15.8286	-2.73737	0.663099	-4.12814	3.65703e-05	0.000355237	Abra	HANDPHALANGES1	HANDPHALANGES3
ENSMUSG00000084989	49.0414	-2.12286	0.514773	-4.12387	3.72553e-05	0.00036136	Crocc2	HANDPHALANGES1	HANDPHALANGES3
ENSMUSG00000047281	1079.82	-2.78762	0.676074	-4.12325	3.73566e-05	0.000362165	Sfn	HANDPHALANGES1	HANDPHALANGES3
ENSMUSG00000011256	322.212	0.835652	0.2027	4.1226	3.74625e-05	0.000362838	Adam19	HANDPHALANGES1	HANDPHALANGES3
ENSMUSG00000057722	757.014	0.700351	0.169913	4.12181	3.75902e-05	0.00036372	Lepr	HANDPHALANGES1	HANDPHALANGES3
ENSMUSG00000021607	784.001	-0.611748	0.148445	-4.12104	3.77168e-05	0.000364767	Mrpl36	HANDPHALANGES1	HANDPHALANGES3
ENSMUSG00000028078	135.318	0.926019	0.224824	4.11887	3.80737e-05	0.000367673	Dclk2	HANDPHALANGES1	HANDPHALANGES3
ENSMUSG00000053291	757.267	-0.581939	0.14129	-4.11876	3.80913e-05	0.000367673	Rab4b	HANDPHALANGES1	HANDPHALANGES3
ENSMUSG00000029373	154.46	-1.21355	0.294692	-4.11804	3.82107e-05	0.000368467	Pf4	HANDPHALANGES1	HANDPHALANGES3
ENSMUSG00000034912	271.74	1.14978	0.279215	4.1179	3.82335e-05	0.000368508	Mdga2	HANDPHALANGES1	HANDPHALANGES3
ENSMUSG00000040896	44.6748	2.01686	0.48991	4.11679	3.84183e-05	0.00036993	Kcnd3	HANDPHALANGES1	HANDPHALANGES3
ENSMUSG00000041592	450.096	0.774451	0.188154	4.11605	3.85425e-05	0.000370766	Sdk2	HANDPHALANGES1	HANDPHALANGES3
ENSMUSG00000020519	435.791	-0.707007	0.171791	-4.11551	3.86328e-05	0.000371455	Sap30l	HANDPHALANGES1	HANDPHALANGES3
ENSMUSG00000003423	809.284	-0.716459	0.174158	-4.11384	3.89129e-05	0.000373786	Pih1d1	HANDPHALANGES1	HANDPHALANGES3
ENSMUSG00000047098	355.763	0.612371	0.148906	4.11248	3.9143e-05	0.000375815	Rnf31	HANDPHALANGES1	HANDPHALANGES3
ENSMUSG00000028964	3005.31	-0.599479	0.145855	-4.1101	3.95492e-05	0.000379531	Park7	HANDPHALANGES1	HANDPHALANGES3
ENSMUSG00000027832	385.787	0.71955	0.175086	4.1097	3.96175e-05	0.000379828	Ptx3	HANDPHALANGES1	HANDPHALANGES3
ENSMUSG00000055301	14.7182	5.10336	1.24188	4.10938	3.9673e-05	0.000380167	Adh7	HANDPHALANGES1	HANDPHALANGES3
ENSMUSG00000113311	209.453	-0.993946	0.241918	-4.1086	3.98059e-05	0.000381074	Gm47428	HANDPHALANGES1	HANDPHALANGES3
ENSMUSG00000028214	955.152	-0.640437	0.155896	-4.10811	3.98904e-05	0.000381698	Gem	HANDPHALANGES1	HANDPHALANGES3
ENSMUSG00000087612	285.127	-0.680928	0.165867	-4.10525	4.03875e-05	0.000385897	A230005M16Rik	HANDPHALANGES1	HANDPHALANGES3
ENSMUSG00000079553	192.334	-0.73066	0.178039	-4.10394	4.06168e-05	0.000387901	Kifc1	HANDPHALANGES1	HANDPHALANGES3
ENSMUSG00000072940	22.5434	-2.16429	0.527614	-4.10204	4.09527e-05	0.000390733	Gm10443	HANDPHALANGES1	HANDPHALANGES3
ENSMUSG00000024883	33.9827	1.9148	0.466817	4.10183	4.09888e-05	0.000390889	Rin1	HANDPHALANGES1	HANDPHALANGES3
ENSMUSG00000061048	774.265	0.662283	0.161608	4.09807	4.16609e-05	0.000396728	Cdh3	HANDPHALANGES1	HANDPHALANGES3
ENSMUSG00000023904	550.934	-0.785123	0.191673	-4.09617	4.20047e-05	0.000399619	Hcfc1r1	HANDPHALANGES1	HANDPHALANGES3
ENSMUSG00000106918	1132.13	-0.58974	0.143972	-4.0962	4.19982e-05	0.000399619	Mrpl33	HANDPHALANGES1	HANDPHALANGES3
ENSMUSG00000111868	82.4057	-1.44765	0.353649	-4.09346	4.2499e-05	0.000403934	Gm47398	HANDPHALANGES1	HANDPHALANGES3
ENSMUSG00000040466	678.804	-0.882842	0.215724	-4.09246	4.26823e-05	0.000405374	Blvrb	HANDPHALANGES1	HANDPHALANGES3
ENSMUSG00000076138	148.183	-2.99583	0.73207	-4.09228	4.27156e-05	0.000405374	Gm26377	HANDPHALANGES1	HANDPHALANGES3
ENSMUSG00000117477	37.1286	-1.69649	0.414568	-4.09219	4.27322e-05	0.000405374	Gm50092	HANDPHALANGES1	HANDPHALANGES3
ENSMUSG00000118552	40.8227	-2.52359	0.616678	-4.09223	4.27252e-05	0.000405374	Rplp2-ps1	HANDPHALANGES1	HANDPHALANGES3
ENSMUSG00000037166	42.0263	-1.561	0.381593	-4.09075	4.29978e-05	0.000407699	Ppp1r14a	HANDPHALANGES1	HANDPHALANGES3
ENSMUSG00000117730	186.009	-0.769431	0.188146	-4.08953	4.32239e-05	0.000409648	Gm5503	HANDPHALANGES1	HANDPHALANGES3
ENSMUSG00000027185	509.229	0.762861	0.186633	4.08749	4.3607e-05	0.000412686	Nat10	HANDPHALANGES1	HANDPHALANGES3
ENSMUSG00000120006	258.49	-0.681912	0.166927	-4.08509	4.40598e-05	0.000416575	Gm57352	HANDPHALANGES1	HANDPHALANGES3
ENSMUSG00000021591	863.877	-0.620634	0.151953	-4.08437	4.41965e-05	0.000417668	Glrx	HANDPHALANGES1	HANDPHALANGES3
ENSMUSG00000022758	12.1118	3.93408	0.963493	4.08314	4.44308e-05	0.000419284	P2rx6	HANDPHALANGES1	HANDPHALANGES3
ENSMUSG00000008855	1384.04	0.63409	0.155339	4.08198	4.46543e-05	0.000421193	Hdac5	HANDPHALANGES1	HANDPHALANGES3
ENSMUSG00000045435	802.005	-0.599719	0.147076	-4.0776	4.55021e-05	0.000428376	Tmem60	HANDPHALANGES1	HANDPHALANGES3
ENSMUSG00000114688	25.5701	-1.98801	0.487675	-4.07651	4.5717e-05	0.000429991	Gm47381	HANDPHALANGES1	HANDPHALANGES3
ENSMUSG00000090260	57.6375	-1.39374	0.342139	-4.0736	4.62926e-05	0.000435199	2810442N19Rik	HANDPHALANGES1	HANDPHALANGES3
ENSMUSG00000027230	474.788	0.615572	0.151159	4.07236	4.65396e-05	0.000437313	Creb3l1	HANDPHALANGES1	HANDPHALANGES3
ENSMUSG00000036856	749.505	-0.746146	0.183272	-4.07125	4.67616e-05	0.000438985	Wnt4	HANDPHALANGES1	HANDPHALANGES3
ENSMUSG00000019768	45.8015	1.86464	0.458634	4.06565	4.78993e-05	0.000448815	Esr1	HANDPHALANGES1	HANDPHALANGES3
ENSMUSG00000038102	977.311	0.592182	0.145667	4.06532	4.79663e-05	0.000449232	Trappc11	HANDPHALANGES1	HANDPHALANGES3
ENSMUSG00000036699	102.188	1.47972	0.364083	4.06424	4.81885e-05	0.0004511	Zcchc12	HANDPHALANGES1	HANDPHALANGES3
ENSMUSG00000039899	22.6666	3.01799	0.742685	4.06362	4.8317e-05	0.00045209	Fgl2	HANDPHALANGES1	HANDPHALANGES3
ENSMUSG00000056004	159.078	1.26116	0.310504	4.06165	4.8728e-05	0.000455077	Elapor2	HANDPHALANGES1	HANDPHALANGES3
ENSMUSG00000041341	464.679	0.862479	0.212467	4.05935	4.92099e-05	0.000458715	Atg2b	HANDPHALANGES1	HANDPHALANGES3
ENSMUSG00000073940	24666.2	-1.86547	0.459581	-4.05907	4.92686e-05	0.000459046	Hbb-bt	HANDPHALANGES1	HANDPHALANGES3
ENSMUSG00000054072	38.9009	3.41236	0.840781	4.05856	4.93759e-05	0.000459831	Iigp1	HANDPHALANGES1	HANDPHALANGES3
ENSMUSG00000029108	1153.24	0.603473	0.148728	4.05756	4.95884e-05	0.000461377	Pcdh7	HANDPHALANGES1	HANDPHALANGES3
ENSMUSG00000049285	156.643	-0.95821	0.236174	-4.05722	4.96602e-05	0.000461829	Mblac1	HANDPHALANGES1	HANDPHALANGES3
ENSMUSG00000020821	173.609	-0.952149	0.234786	-4.0554	5.00492e-05	0.000465228	Kif1c	HANDPHALANGES1	HANDPHALANGES3
ENSMUSG00000051329	848.541	0.759028	0.187262	4.05329	5.05018e-05	0.000469215	Nup160	HANDPHALANGES1	HANDPHALANGES3
ENSMUSG00000059363	362.827	-0.830259	0.204845	-4.05311	5.05417e-05	0.000469366	Fxn	HANDPHALANGES1	HANDPHALANGES3
ENSMUSG00000002885	736.312	0.583816	0.144062	4.05254	5.06655e-05	0.000470296	Adgre5	HANDPHALANGES1	HANDPHALANGES3
ENSMUSG00000001349	172.133	-1.09026	0.269118	-4.05123	5.09498e-05	0.000472052	Cnn1	HANDPHALANGES1	HANDPHALANGES3
ENSMUSG00000085622	287.143	-0.580307	0.143242	-4.05124	5.09463e-05	0.000472052	3110056K07Rik	HANDPHALANGES1	HANDPHALANGES3
ENSMUSG00000029304	73.1933	1.38585	0.342225	4.04952	5.13236e-05	0.000475294	Spp1	HANDPHALANGES1	HANDPHALANGES3
ENSMUSG00000033063	76.3249	1.65969	0.409884	4.04917	5.14e-05	0.000475779	Cntnap3	HANDPHALANGES1	HANDPHALANGES3
ENSMUSG00000074220	242.815	0.843445	0.20833	4.04861	5.15237e-05	0.000476702	Zfp382	HANDPHALANGES1	HANDPHALANGES3
ENSMUSG00000041445	258.741	1.1858	0.293016	4.04687	5.19068e-05	0.000480023	Mmrn2	HANDPHALANGES1	HANDPHALANGES3
ENSMUSG00000032083	34.2876	-2.24723	0.55561	-4.04462	5.24078e-05	0.000483755	Apoa1	HANDPHALANGES1	HANDPHALANGES3
ENSMUSG00000074272	17.288	3.8406	0.949553	4.04464	5.24029e-05	0.000483755	Ceacam1	HANDPHALANGES1	HANDPHALANGES3
ENSMUSG00000052305	73436.9	-1.8815	0.465239	-4.04415	5.2514e-05	0.00048451	Hbb-bs	HANDPHALANGES1	HANDPHALANGES3
ENSMUSG00000033365	909.607	0.735958	0.182099	4.04151	5.3107e-05	0.000488919	Ipo13	HANDPHALANGES1	HANDPHALANGES3
ENSMUSG00000039167	148.679	1.08853	0.269355	4.04126	5.31656e-05	0.000488919	Adgrl4	HANDPHALANGES1	HANDPHALANGES3
ENSMUSG00000027166	366.799	-0.655426	0.162218	-4.04041	5.33584e-05	0.00049009	Dnajc24	HANDPHALANGES1	HANDPHALANGES3
ENSMUSG00000061273	1026.96	0.800218	0.198055	4.04038	5.33656e-05	0.00049009	Mmgt1	HANDPHALANGES1	HANDPHALANGES3
ENSMUSG00000038822	720.273	0.711793	0.176293	4.03755	5.40125e-05	0.000495115	Hace1	HANDPHALANGES1	HANDPHALANGES3
ENSMUSG00000099764	66.3628	-1.48628	0.36822	-4.03638	5.42816e-05	0.000497352	Rps10-ps2	HANDPHALANGES1	HANDPHALANGES3
ENSMUSG00000048402	682.207	0.692944	0.171704	4.03569	5.44411e-05	0.000498583	Gli2	HANDPHALANGES1	HANDPHALANGES3
ENSMUSG00000018428	448.818	0.5817	0.144228	4.03319	5.50244e-05	0.000503228	Akap1	HANDPHALANGES1	HANDPHALANGES3
ENSMUSG00000039458	1001.45	0.72285	0.179225	4.0332	5.50222e-05	0.000503228	Mtmr12	HANDPHALANGES1	HANDPHALANGES3
ENSMUSG00000025089	285.554	0.847003	0.210096	4.03151	5.54195e-05	0.00050591	Gfra1	HANDPHALANGES1	HANDPHALANGES3
ENSMUSG00000024130	372.192	0.640792	0.159005	4.03	5.57758e-05	0.000508695	Abca3	HANDPHALANGES1	HANDPHALANGES3
ENSMUSG00000021895	992.978	0.958818	0.238155	4.02602	5.67279e-05	0.000516429	Arhgef3	HANDPHALANGES1	HANDPHALANGES3
ENSMUSG00000070504	18.4178	3.7977	0.943272	4.0261	5.67102e-05	0.000516429	Fcrl6	HANDPHALANGES1	HANDPHALANGES3
ENSMUSG00000019791	201.035	-0.683271	0.169785	-4.02434	5.71352e-05	0.000519661	Hint3	HANDPHALANGES1	HANDPHALANGES3
ENSMUSG00000019124	310.173	1.14725	0.285105	4.02397	5.72245e-05	0.000520234	Scrn1	HANDPHALANGES1	HANDPHALANGES3
ENSMUSG00000032380	82.408	1.58506	0.394125	4.02171	5.7776e-05	0.000524768	Dapk2	HANDPHALANGES1	HANDPHALANGES3
ENSMUSG00000059022	508.591	0.722063	0.179537	4.02181	5.77518e-05	0.000524768	Kcp	HANDPHALANGES1	HANDPHALANGES3
ENSMUSG00000048240	259.309	0.969798	0.241159	4.0214	5.78521e-05	0.000524978	Gng7	HANDPHALANGES1	HANDPHALANGES3
ENSMUSG00000020770	1418.76	0.619578	0.154103	4.02054	5.80657e-05	0.000526676	Unk	HANDPHALANGES1	HANDPHALANGES3
ENSMUSG00000094002	12.1158	-4.33563	1.0789	-4.01858	5.85511e-05	0.000530594	Silc1	HANDPHALANGES1	HANDPHALANGES3
ENSMUSG00000041552	74.4178	1.93885	0.482804	4.01581	5.92417e-05	0.000536363	Ptchd1	HANDPHALANGES1	HANDPHALANGES3
ENSMUSG00000032849	67.4579	1.62237	0.40414	4.01436	5.96064e-05	0.000539173	Abcc4	HANDPHALANGES1	HANDPHALANGES3
ENSMUSG00000021464	690.891	0.697569	0.173829	4.01297	5.99602e-05	0.00054188	Ror2	HANDPHALANGES1	HANDPHALANGES3
ENSMUSG00000040712	469.137	0.879794	0.21926	4.01256	6.00627e-05	0.000542364	Camta2	HANDPHALANGES1	HANDPHALANGES3
ENSMUSG00000030123	306.553	0.695551	0.173366	4.01205	6.01948e-05	0.000543258	Plxnd1	HANDPHALANGES1	HANDPHALANGES3
ENSMUSG00000044667	44.8043	1.73309	0.432085	4.011	6.04628e-05	0.000545182	Plppr4	HANDPHALANGES1	HANDPHALANGES3
ENSMUSG00000086754	234.801	-0.892243	0.222446	-4.01105	6.04486e-05	0.000545182	Gm16098	HANDPHALANGES1	HANDPHALANGES3
ENSMUSG00000031616	1124.71	0.692271	0.172708	4.00833	6.11499e-05	0.000550783	Ednra	HANDPHALANGES1	HANDPHALANGES3
ENSMUSG00000120863	166.103	-0.877157	0.218837	-4.00826	6.11673e-05	0.000550783	Gm56582	HANDPHALANGES1	HANDPHALANGES3
ENSMUSG00000061718	252.25	-0.774887	0.193345	-4.0078	6.12867e-05	0.000551608	Ppp1r1b	HANDPHALANGES1	HANDPHALANGES3
ENSMUSG00000034235	588.552	0.661824	0.165243	4.00516	6.19757e-05	0.000557052	Usp54	HANDPHALANGES1	HANDPHALANGES3
ENSMUSG00000039195	363.494	-0.74178	0.185217	-4.00492	6.20395e-05	0.000557373	Bbln	HANDPHALANGES1	HANDPHALANGES3
ENSMUSG00000038349	117.409	1.13208	0.282929	4.00127	6.30023e-05	0.000565164	Plcl1	HANDPHALANGES1	HANDPHALANGES3
ENSMUSG00000101162	119.051	-1.08967	0.272334	-4.00121	6.30206e-05	0.000565164	Gm26728	HANDPHALANGES1	HANDPHALANGES3
ENSMUSG00000028914	551.438	0.660988	0.16522	4.00065	6.31693e-05	0.000566242	Casp9	HANDPHALANGES1	HANDPHALANGES3
ENSMUSG00000042961	536.612	0.749448	0.187635	3.99417	6.49204e-05	0.000580105	Egflam	HANDPHALANGES1	HANDPHALANGES3
ENSMUSG00000051518	430.232	-0.788726	0.197551	-3.99251	6.53769e-05	0.00058366	Rps19bp1	HANDPHALANGES1	HANDPHALANGES3
ENSMUSG00000031805	296.348	0.747111	0.18716	3.99182	6.5568e-05	0.000585102	Jak3	HANDPHALANGES1	HANDPHALANGES3
ENSMUSG00000022456	562.184	0.581715	0.145738	3.99152	6.565e-05	0.000585571	Septin3	HANDPHALANGES1	HANDPHALANGES3
ENSMUSG00000034462	2486.95	0.580901	0.145749	3.98563	6.73015e-05	0.000598956	Pkd2	HANDPHALANGES1	HANDPHALANGES3
ENSMUSG00000106943	258.765	-0.743013	0.186501	-3.98396	6.77774e-05	0.000602922	Dancr	HANDPHALANGES1	HANDPHALANGES3
ENSMUSG00000068184	232.468	-0.907769	0.2279	-3.9832	6.79946e-05	0.000604582	Ndufaf2	HANDPHALANGES1	HANDPHALANGES3
ENSMUSG00000030075	89.2615	1.41623	0.355582	3.98286	6.80912e-05	0.00060517	Cntn3	HANDPHALANGES1	HANDPHALANGES3
ENSMUSG00000089945	564.403	1.11318	0.279659	3.98048	6.8775e-05	0.000610701	Pakap	HANDPHALANGES1	HANDPHALANGES3
ENSMUSG00000039057	6.52744	4.83095	1.21374	3.98024	6.88469e-05	0.000611066	Myo16	HANDPHALANGES1	HANDPHALANGES3
ENSMUSG00000020056	712.975	-0.70537	0.177286	-3.97871	6.92902e-05	0.000614726	Washc3	HANDPHALANGES1	HANDPHALANGES3
ENSMUSG00000019888	14.5623	3.78255	0.950941	3.97769	6.95886e-05	0.000616272	Mgat4c	HANDPHALANGES1	HANDPHALANGES3
ENSMUSG00000037440	150.906	-1.27946	0.321772	-3.97629	6.99974e-05	0.000619616	Vnn1	HANDPHALANGES1	HANDPHALANGES3
ENSMUSG00000026748	1504.85	0.586227	0.147468	3.97528	7.02976e-05	0.000621996	Plxdc2	HANDPHALANGES1	HANDPHALANGES3
ENSMUSG00000029569	1718.15	0.59811	0.150549	3.97287	7.10111e-05	0.000628029	Tmem168	HANDPHALANGES1	HANDPHALANGES3
ENSMUSG00000078572	351.183	-0.806159	0.202922	-3.97275	7.10474e-05	0.000628071	Ndufaf8	HANDPHALANGES1	HANDPHALANGES3
ENSMUSG00000030830	13.5078	4.22573	1.0639	3.97193	7.12918e-05	0.00062967	Itgal	HANDPHALANGES1	HANDPHALANGES3
ENSMUSG00000019808	269.504	-0.667482	0.168071	-3.97144	7.14401e-05	0.0006307	Adat2	HANDPHALANGES1	HANDPHALANGES3
ENSMUSG00000086126	117.586	-1.12855	0.284229	-3.97057	7.17003e-05	0.000632434	Evx1os	HANDPHALANGES1	HANDPHALANGES3
ENSMUSG00000022427	1066.31	-0.620142	0.156292	-3.96785	7.25249e-05	0.000639424	Tomm22	HANDPHALANGES1	HANDPHALANGES3
ENSMUSG00000060923	76.3126	-1.40368	0.353804	-3.9674	7.26609e-05	0.000640111	Acyp2	HANDPHALANGES1	HANDPHALANGES3
ENSMUSG00000085837	73.8953	-1.08571	0.273897	-3.96393	7.37272e-05	0.000648619	Kcnmb4os2	HANDPHALANGES1	HANDPHALANGES3
ENSMUSG00000020514	622.978	-0.643046	0.162255	-3.96318	7.39566e-05	0.000650314	Mrpl22	HANDPHALANGES1	HANDPHALANGES3
ENSMUSG00000039523	653.17	0.598968	0.151155	3.96262	7.41328e-05	0.000651557	Cep104	HANDPHALANGES1	HANDPHALANGES3
ENSMUSG00000048200	162.573	-0.963115	0.24311	-3.96165	7.4435e-05	0.000653652	Cracr2b	HANDPHALANGES1	HANDPHALANGES3
ENSMUSG00000047141	447.587	0.846855	0.213789	3.96117	7.4584e-05	0.000654671	Zfp654	HANDPHALANGES1	HANDPHALANGES3
ENSMUSG00000028861	786.248	-0.672103	0.169691	-3.96074	7.47179e-05	0.000655557	Mrps15	HANDPHALANGES1	HANDPHALANGES3
ENSMUSG00000043644	53.5268	-1.36013	0.343417	-3.96056	7.4773e-05	0.00065575	0610009L18Rik	HANDPHALANGES1	HANDPHALANGES3
ENSMUSG00000030615	672.144	-0.59547	0.150389	-3.95954	7.50954e-05	0.000657706	Tmem126a	HANDPHALANGES1	HANDPHALANGES3
ENSMUSG00000019894	74.3281	2.14045	0.540672	3.95887	7.53044e-05	0.000658665	Slc6a15	HANDPHALANGES1	HANDPHALANGES3
ENSMUSG00000036502	618.615	0.692595	0.174983	3.95808	7.55538e-05	0.000660555	Tmem255a	HANDPHALANGES1	HANDPHALANGES3
ENSMUSG00000028763	627.557	0.666154	0.168315	3.95777	7.56515e-05	0.000661118	Hspg2	HANDPHALANGES1	HANDPHALANGES3
ENSMUSG00000033099	574.033	-0.601227	0.151953	-3.95665	7.60075e-05	0.000663937	Nol12	HANDPHALANGES1	HANDPHALANGES3
ENSMUSG00000086739	16.5163	2.95918	0.748393	3.95404	7.68418e-05	0.00067034	Gm4409	HANDPHALANGES1	HANDPHALANGES3
ENSMUSG00000047213	2132.91	0.618605	0.156498	3.95279	7.72468e-05	0.000673282	Ythdf3	HANDPHALANGES1	HANDPHALANGES3
ENSMUSG00000068614	72.9046	-4.05208	1.02512	-3.95279	7.72441e-05	0.000673282	Actc1	HANDPHALANGES1	HANDPHALANGES3
ENSMUSG00000035112	226.016	0.777845	0.196912	3.95022	7.80803e-05	0.000679354	Wnk4	HANDPHALANGES1	HANDPHALANGES3
ENSMUSG00000062609	390.138	-0.939509	0.237836	-3.95024	7.80713e-05	0.000679354	Kcnj15	HANDPHALANGES1	HANDPHALANGES3
ENSMUSG00000001052	1266.3	0.654442	0.165714	3.94922	7.84058e-05	0.00068129	Sec24b	HANDPHALANGES1	HANDPHALANGES3
ENSMUSG00000032193	639.524	0.828819	0.209863	3.94932	7.83721e-05	0.00068129	Ldlr	HANDPHALANGES1	HANDPHALANGES3
ENSMUSG00000030800	84.3037	-1.26337	0.320052	-3.9474	7.9004e-05	0.000685288	Prss8	HANDPHALANGES1	HANDPHALANGES3
ENSMUSG00000038843	278.492	0.886007	0.22448	3.94693	7.91591e-05	0.000686034	Gcnt1	HANDPHALANGES1	HANDPHALANGES3
ENSMUSG00000031166	816.942	0.620822	0.157365	3.94512	7.97613e-05	0.000689748	Wdr13	HANDPHALANGES1	HANDPHALANGES3
ENSMUSG00000116815	243.418	1.18808	0.301146	3.94521	7.97294e-05	0.000689748	Gm49760	HANDPHALANGES1	HANDPHALANGES3
ENSMUSG00000046380	417.035	0.633337	0.160594	3.9437	8.02326e-05	0.000692918	Jrk	HANDPHALANGES1	HANDPHALANGES3
ENSMUSG00000118346	594.863	-0.658654	0.167088	-3.94196	8.08173e-05	0.000697361	Tmem179b	HANDPHALANGES1	HANDPHALANGES3
ENSMUSG00000033214	196.355	0.94963	0.240937	3.9414	8.10079e-05	0.000698398	Slitrk5	HANDPHALANGES1	HANDPHALANGES3
ENSMUSG00000052533	659.458	0.661266	0.167804	3.94071	8.12398e-05	0.000700094	Nup188	HANDPHALANGES1	HANDPHALANGES3
ENSMUSG00000033906	811.157	0.744524	0.189075	3.93772	8.22593e-05	0.000707958	Zdhhc15	HANDPHALANGES1	HANDPHALANGES3
ENSMUSG00000021782	1058.44	0.610364	0.155027	3.93716	8.24517e-05	0.000709306	Dlg5	HANDPHALANGES1	HANDPHALANGES3
ENSMUSG00000022306	276.519	0.753772	0.191591	3.93428	8.34464e-05	0.000716931	Zfpm2	HANDPHALANGES1	HANDPHALANGES3
ENSMUSG00000036304	22.9126	2.68532	0.682591	3.93401	8.3541e-05	0.000717258	Zdhhc23	HANDPHALANGES1	HANDPHALANGES3
ENSMUSG00000061816	16.3599	-3.57099	0.907876	-3.93335	8.3771e-05	0.000718787	Myl1	HANDPHALANGES1	HANDPHALANGES3
ENSMUSG00000029311	55.3135	-1.20474	0.306584	-3.92957	8.50992e-05	0.000728763	Hsd17b11	HANDPHALANGES1	HANDPHALANGES3
ENSMUSG00000062727	40.2928	-1.82896	0.465596	-3.92822	8.5577e-05	0.00073154	H2bc12	HANDPHALANGES1	HANDPHALANGES3
ENSMUSG00000063856	6330.73	-1.15385	0.293737	-3.92819	8.55889e-05	0.00073154	Gpx1	HANDPHALANGES1	HANDPHALANGES3
ENSMUSG00000067038	88.3212	-3.80772	0.969399	-3.92791	8.56857e-05	0.000732052	Rps12-ps3	HANDPHALANGES1	HANDPHALANGES3
ENSMUSG00000036617	256.394	0.763802	0.194515	3.92669	8.61219e-05	0.000735319	Etl4	HANDPHALANGES1	HANDPHALANGES3
ENSMUSG00000102590	12.8661	-3.1738	0.808332	-3.92635	8.62434e-05	0.000735867	Mannr	HANDPHALANGES1	HANDPHALANGES3
ENSMUSG00000045790	87.609	1.65519	0.421788	3.92423	8.70081e-05	0.000741436	Ccdc149	HANDPHALANGES1	HANDPHALANGES3
ENSMUSG00000073002	119.438	-1.23266	0.314198	-3.9232	8.73792e-05	0.00074396	Vamp5	HANDPHALANGES1	HANDPHALANGES3
ENSMUSG00000000125	44.2422	-2.49008	0.634824	-3.92248	8.76432e-05	0.000745568	Wnt3	HANDPHALANGES1	HANDPHALANGES3
ENSMUSG00000037474	2001.1	0.602579	0.15362	3.92253	8.76241e-05	0.000745568	Dtl	HANDPHALANGES1	HANDPHALANGES3
ENSMUSG00000038984	277.267	0.796724	0.203241	3.9201	8.85122e-05	0.000752638	Tspyl5	HANDPHALANGES1	HANDPHALANGES3
ENSMUSG00000045658	2350.77	0.606276	0.154692	3.91925	8.88265e-05	0.000754019	Pid1	HANDPHALANGES1	HANDPHALANGES3
ENSMUSG00000074479	331.23	-0.744833	0.190041	-3.91933	8.87973e-05	0.000754019	Rtraf-ps	HANDPHALANGES1	HANDPHALANGES3
ENSMUSG00000020415	1140.16	-0.598487	0.152735	-3.91848	8.91095e-05	0.000755775	Pttg1	HANDPHALANGES1	HANDPHALANGES3
ENSMUSG00000024868	396.432	-0.847705	0.216406	-3.91719	8.95877e-05	0.000759506	Dkk1	HANDPHALANGES1	HANDPHALANGES3
ENSMUSG00000041774	195.188	-0.822317	0.209943	-3.91686	8.97104e-05	0.000760127	Ydjc	HANDPHALANGES1	HANDPHALANGES3
ENSMUSG00000035131	17.2699	3.77361	0.963511	3.91652	8.98365e-05	0.000760641	Brinp3	HANDPHALANGES1	HANDPHALANGES3
ENSMUSG00000091086	87.8511	-1.10365	0.281811	-3.91627	8.99296e-05	0.000761105	Rpl6l	HANDPHALANGES1	HANDPHALANGES3
ENSMUSG00000021987	1526.12	0.699057	0.178519	3.91586	9.00809e-05	0.000762061	Mtmr6	HANDPHALANGES1	HANDPHALANGES3
ENSMUSG00000072898	45.621	-1.54382	0.394259	-3.91574	9.0126e-05	0.000762117	NA	HANDPHALANGES1	HANDPHALANGES3
ENSMUSG00000090110	184.849	-0.754216	0.192707	-3.91379	9.08573e-05	0.000767648	Cmc4	HANDPHALANGES1	HANDPHALANGES3
ENSMUSG00000087478	134.987	-1.07841	0.275582	-3.91319	9.10845e-05	0.000768912	4930506C21Rik	HANDPHALANGES1	HANDPHALANGES3
ENSMUSG00000026123	372.549	0.588307	0.15038	3.91212	9.14891e-05	0.000771227	Plekhb2	HANDPHALANGES1	HANDPHALANGES3
ENSMUSG00000056501	547.508	-0.986404	0.252145	-3.91206	9.15141e-05	0.000771227	Cebpb	HANDPHALANGES1	HANDPHALANGES3
ENSMUSG00000049511	33.2824	3.74697	0.957862	3.91181	9.16067e-05	0.00077168	Htr1b	HANDPHALANGES1	HANDPHALANGES3
ENSMUSG00000075588	14.947	-3.8409	0.982458	-3.90948	9.24946e-05	0.000778334	Hoxb2	HANDPHALANGES1	HANDPHALANGES3
ENSMUSG00000110949	277.701	-0.737139	0.188557	-3.90937	9.25354e-05	0.000778334	Nudt8	HANDPHALANGES1	HANDPHALANGES3
ENSMUSG00000025509	327.405	0.694887	0.177838	3.90743	9.3285e-05	0.000783491	Pnpla2	HANDPHALANGES1	HANDPHALANGES3
ENSMUSG00000087022	97.4639	-1.2358	0.316417	-3.90563	9.39821e-05	0.000789013	9130024F11Rik	HANDPHALANGES1	HANDPHALANGES3
ENSMUSG00000021390	5002.74	0.722038	0.184964	3.90366	9.47495e-05	0.000795119	Ogn	HANDPHALANGES1	HANDPHALANGES3
ENSMUSG00000007122	21.1879	2.87398	0.736508	3.90217	9.53324e-05	0.000799334	Casq1	HANDPHALANGES1	HANDPHALANGES3
ENSMUSG00000002007	46.778	1.69179	0.433573	3.90197	9.54112e-05	0.000799658	Srpk3	HANDPHALANGES1	HANDPHALANGES3
ENSMUSG00000085560	69.6936	-1.04771	0.268591	-3.90075	9.58954e-05	0.000803038	C230038L03Rik	HANDPHALANGES1	HANDPHALANGES3
ENSMUSG00000086240	73.8367	-1.25689	0.32251	-3.89721	9.73085e-05	0.000814184	Gm7846	HANDPHALANGES1	HANDPHALANGES3
ENSMUSG00000022075	360.746	0.585897	0.150367	3.89646	9.76099e-05	0.000816363	Rhobtb2	HANDPHALANGES1	HANDPHALANGES3
ENSMUSG00000038880	662.079	-0.675427	0.173362	-3.89606	9.77698e-05	0.000817355	Mrps34	HANDPHALANGES1	HANDPHALANGES3
ENSMUSG00000049235	344.79	-0.661295	0.169748	-3.89575	9.78936e-05	0.000818046	Gm7324	HANDPHALANGES1	HANDPHALANGES3
ENSMUSG00000029334	279.803	0.896647	0.230244	3.89433	9.84724e-05	0.000822537	Prkg2	HANDPHALANGES1	HANDPHALANGES3
ENSMUSG00000068391	1149.94	-0.641596	0.164841	-3.89222	9.93314e-05	0.00082797	Chrac1	HANDPHALANGES1	HANDPHALANGES3
ENSMUSG00000028843	1985.77	-0.597484	0.153518	-3.89194	9.94454e-05	0.000828534	Sh3bgrl3	HANDPHALANGES1	HANDPHALANGES3
ENSMUSG00000053329	669.361	-0.58159	0.149477	-3.89084	9.98976e-05	0.000831642	Gatd3a	HANDPHALANGES1	HANDPHALANGES3
ENSMUSG00000041763	1871.58	0.628192	0.161603	3.88725	0.000101387	0.000842279	Tpp2	HANDPHALANGES1	HANDPHALANGES3
ENSMUSG00000070867	272.156	-0.730779	0.188003	-3.88707	0.000101462	0.000842547	Trabd2b	HANDPHALANGES1	HANDPHALANGES3
ENSMUSG00000025742	321.93	0.85896	0.22116	3.88389	0.000102799	0.00085222	Prps2	HANDPHALANGES1	HANDPHALANGES3
ENSMUSG00000039601	108.245	1.49162	0.384097	3.88344	0.000102991	0.000853455	Rcan2	HANDPHALANGES1	HANDPHALANGES3
ENSMUSG00000047843	108.333	-1.0253	0.264163	-3.88132	0.000103889	0.000859497	Bri3	HANDPHALANGES1	HANDPHALANGES3
ENSMUSG00000023484	29.9371	2.16052	0.556826	3.88006	0.000104431	0.000863593	Prph	HANDPHALANGES1	HANDPHALANGES3
ENSMUSG00000059668	625.761	-6.3219	1.62939	-3.87992	0.000104493	0.000863739	Krt4	HANDPHALANGES1	HANDPHALANGES3
ENSMUSG00000120144	64.7259	-1.42356	0.367048	-3.8784	0.000105145	0.000868772	Gm56517	HANDPHALANGES1	HANDPHALANGES3
ENSMUSG00000070371	150.653	-0.743706	0.191781	-3.8779	0.00010536	0.000870187	Prss36	HANDPHALANGES1	HANDPHALANGES3
ENSMUSG00000035778	378.789	0.824261	0.212579	3.87743	0.000105566	0.00087152	Ggta1	HANDPHALANGES1	HANDPHALANGES3
ENSMUSG00000003271	128.287	-1.57347	0.406156	-3.87407	0.000107035	0.000882913	Sult2b1	HANDPHALANGES1	HANDPHALANGES3
ENSMUSG00000032085	122.454	-1.06375	0.274618	-3.87355	0.00010726	0.000884343	Tagln	HANDPHALANGES1	HANDPHALANGES3
ENSMUSG00000022225	144.672	-1.67671	0.433063	-3.87174	0.000108061	0.000889373	Cma1	HANDPHALANGES1	HANDPHALANGES3
ENSMUSG00000028948	836.336	0.601496	0.155358	3.87168	0.000108087	0.000889373	Nol9	HANDPHALANGES1	HANDPHALANGES3
ENSMUSG00000051498	170.737	1.10619	0.286113	3.86628	0.000110507	0.000906779	Tlr6	HANDPHALANGES1	HANDPHALANGES3
ENSMUSG00000106702	114.442	-0.993436	0.257005	-3.86544	0.000110889	0.000909045	Mxd4os1	HANDPHALANGES1	HANDPHALANGES3
ENSMUSG00000026830	17.7475	-3.32848	0.861688	-3.86274	0.000112123	0.000916508	Ermn	HANDPHALANGES1	HANDPHALANGES3
ENSMUSG00000024959	946.169	-0.602388	0.155966	-3.86231	0.00011232	0.000917745	Bad	HANDPHALANGES1	HANDPHALANGES3
ENSMUSG00000029061	109.632	-1.22012	0.316021	-3.86089	0.000112974	0.000922327	Mmp23	HANDPHALANGES1	HANDPHALANGES3
ENSMUSG00000027562	758.047	-1.03505	0.268103	-3.86064	0.000113092	0.00092291	Car2	HANDPHALANGES1	HANDPHALANGES3
ENSMUSG00000055717	266.267	0.682851	0.177075	3.85628	0.000115123	0.000939102	Slain1	HANDPHALANGES1	HANDPHALANGES3
ENSMUSG00000043510	146.923	-1.0712	0.277797	-3.85603	0.000115242	0.000939681	Hscb	HANDPHALANGES1	HANDPHALANGES3
ENSMUSG00000040363	550.607	0.732017	0.189927	3.8542	0.000116109	0.000945199	Bcor	HANDPHALANGES1	HANDPHALANGES3
ENSMUSG00000032017	31.6004	1.97008	0.511227	3.85363	0.000116379	0.000946624	Grik4	HANDPHALANGES1	HANDPHALANGES3
ENSMUSG00000024987	104.811	-0.927501	0.240719	-3.85305	0.000116656	0.000948488	Cyp26a1	HANDPHALANGES1	HANDPHALANGES3
ENSMUSG00000074754	123.495	-1.05357	0.273513	-3.85198	0.000117168	0.000952259	Smim26	HANDPHALANGES1	HANDPHALANGES3
ENSMUSG00000041649	191.584	1.14794	0.298027	3.8518	0.000117253	0.000952564	Klf8	HANDPHALANGES1	HANDPHALANGES3
ENSMUSG00000027695	206.994	1.30924	0.339941	3.85137	0.00011746	0.000953854	Pld1	HANDPHALANGES1	HANDPHALANGES3
ENSMUSG00000020884	46.7803	-1.42274	0.369701	-3.84834	0.000118921	0.000964924	Asgr1	HANDPHALANGES1	HANDPHALANGES3
ENSMUSG00000010476	283.7	0.757308	0.196801	3.84808	0.000119045	0.000965537	Ebf3	HANDPHALANGES1	HANDPHALANGES3
ENSMUSG00000078126	54.9451	-1.50164	0.390366	-3.84675	0.000119694	0.000970406	Rpl23a-ps3	HANDPHALANGES1	HANDPHALANGES3
ENSMUSG00000045502	27.044	-3.40052	0.884338	-3.84527	0.000120419	0.000974295	Hcar2	HANDPHALANGES1	HANDPHALANGES3
ENSMUSG00000111080	208.773	0.75973	0.197617	3.84446	0.00012082	0.000977141	Gm20300	HANDPHALANGES1	HANDPHALANGES3
ENSMUSG00000006014	201.812	-1.09692	0.285422	-3.84314	0.000121469	0.000981994	Prg4	HANDPHALANGES1	HANDPHALANGES3
ENSMUSG00000042228	320.488	0.83228	0.216654	3.84152	0.000122273	0.000988089	Lyn	HANDPHALANGES1	HANDPHALANGES3
ENSMUSG00000026773	358.97	0.601468	0.156627	3.84014	0.000122966	0.000992976	Pfkfb3	HANDPHALANGES1	HANDPHALANGES3
ENSMUSG00000073433	79.134	-1.31575	0.342662	-3.83978	0.000123145	0.000993921	Arhgdig	HANDPHALANGES1	HANDPHALANGES3
ENSMUSG00000097397	127.891	-0.931955	0.242738	-3.83934	0.000123364	0.00099528	Gm16861	HANDPHALANGES1	HANDPHALANGES3
ENSMUSG00000028108	97.6505	0.952552	0.248141	3.83876	0.000123658	0.000996604	Ecm1	HANDPHALANGES1	HANDPHALANGES3
ENSMUSG00000040767	501.032	-0.676972	0.176346	-3.83889	0.000123591	0.000996604	Snrnp25	HANDPHALANGES1	HANDPHALANGES3
ENSMUSG00000049122	40.2803	1.60466	0.418019	3.83872	0.000123678	0.000996604	Frmd3	HANDPHALANGES1	HANDPHALANGES3
ENSMUSG00000040904	212.001	-0.747152	0.194734	-3.83677	0.000124662	0.00100291	Gm21988	HANDPHALANGES1	HANDPHALANGES3
ENSMUSG00000035948	65.7476	2.10696	0.54956	3.83389	0.00012613	0.00101387	Acss3	HANDPHALANGES1	HANDPHALANGES3
ENSMUSG00000045252	1052.17	0.707803	0.184765	3.83083	0.00012771	0.00102369	Zfp574	HANDPHALANGES1	HANDPHALANGES3
ENSMUSG00000037531	619.164	-0.646295	0.168795	-3.82888	0.000128729	0.00103061	Mrpl47	HANDPHALANGES1	HANDPHALANGES3
ENSMUSG00000063172	276.04	-0.862796	0.225422	-3.82747	0.000129468	0.00103486	Ift25	HANDPHALANGES1	HANDPHALANGES3
ENSMUSG00000072955	149.329	-0.949584	0.248157	-3.82655	0.000129953	0.0010379	Tmsb15l	HANDPHALANGES1	HANDPHALANGES3
ENSMUSG00000026388	55.521	-1.45332	0.380044	-3.82409	0.000131255	0.00104619	3110009E18Rik	HANDPHALANGES1	HANDPHALANGES3
ENSMUSG00000021118	57.1574	-1.88627	0.493288	-3.82387	0.000131374	0.00104672	Plek2	HANDPHALANGES1	HANDPHALANGES3
ENSMUSG00000081895	31.5457	-1.90211	0.497522	-3.82316	0.00013175	0.0010493	Rpl17-ps10	HANDPHALANGES1	HANDPHALANGES3
ENSMUSG00000021236	472.455	0.824917	0.215785	3.82287	0.000131908	0.00104983	Entpd5	HANDPHALANGES1	HANDPHALANGES3
ENSMUSG00000014599	400.699	0.74191	0.194237	3.81961	0.000133665	0.00106157	Csf1	HANDPHALANGES1	HANDPHALANGES3
ENSMUSG00000020231	586.354	0.8249	0.216011	3.81879	0.000134109	0.00106425	Dip2a	HANDPHALANGES1	HANDPHALANGES3
ENSMUSG00000035275	531.234	0.779262	0.204075	3.81851	0.00013426	0.00106501	Raver2	HANDPHALANGES1	HANDPHALANGES3
ENSMUSG00000015745	329.897	-0.618628	0.162082	-3.81676	0.000135215	0.00107131	Plekho1	HANDPHALANGES1	HANDPHALANGES3
ENSMUSG00000019359	53.1296	1.37672	0.360722	3.81658	0.000135315	0.00107167	Gdpd2	HANDPHALANGES1	HANDPHALANGES3
ENSMUSG00000053646	735.025	0.595052	0.155946	3.81576	0.000135764	0.00107437	Plxnb1	HANDPHALANGES1	HANDPHALANGES3
ENSMUSG00000026797	575.598	0.603496	0.158167	3.81555	0.00013588	0.00107486	Stxbp1	HANDPHALANGES1	HANDPHALANGES3
ENSMUSG00000028741	741.675	-0.608582	0.159626	-3.81254	0.000137548	0.00108632	Mrto4	HANDPHALANGES1	HANDPHALANGES3
ENSMUSG00000069972	82.2015	-1.19273	0.3129	-3.81186	0.000137924	0.00108843	Rps13-ps2	HANDPHALANGES1	HANDPHALANGES3
ENSMUSG00000044927	436.351	-0.644143	0.16903	-3.81082	0.000138505	0.00109258	H1f10	HANDPHALANGES1	HANDPHALANGES3
ENSMUSG00000050473	14.9626	3.35549	0.880614	3.8104	0.000138743	0.00109383	Slc35d3	HANDPHALANGES1	HANDPHALANGES3
ENSMUSG00000060012	248.568	0.749224	0.196629	3.81034	0.000138775	0.00109383	Kif13b	HANDPHALANGES1	HANDPHALANGES3
ENSMUSG00000025492	572.493	-0.781724	0.205259	-3.80848	0.000139823	0.00110166	Ifitm3	HANDPHALANGES1	HANDPHALANGES3
ENSMUSG00000039737	409.878	-0.673633	0.176931	-3.80731	0.000140487	0.00110645	Prkrip1	HANDPHALANGES1	HANDPHALANGES3
ENSMUSG00000055026	103.823	-1.49304	0.392434	-3.80457	0.000142051	0.00111744	Gabrg3	HANDPHALANGES1	HANDPHALANGES3
ENSMUSG00000106847	338.319	0.697658	0.183457	3.80283	0.000143052	0.00112398	Peg13	HANDPHALANGES1	HANDPHALANGES3
ENSMUSG00000019929	1911.79	-0.804899	0.211683	-3.80238	0.000143312	0.00112478	Dcn	HANDPHALANGES1	HANDPHALANGES3
ENSMUSG00000034247	364.663	0.68552	0.180285	3.80242	0.000143288	0.00112478	Plekhm1	HANDPHALANGES1	HANDPHALANGES3
ENSMUSG00000053950	618.376	0.806655	0.212146	3.80236	0.000143325	0.00112478	Adnp2	HANDPHALANGES1	HANDPHALANGES3
ENSMUSG00000094942	42.9487	2.36529	0.622074	3.80226	0.00014338	0.00112478	Gm3604	HANDPHALANGES1	HANDPHALANGES3
ENSMUSG00000023915	472.357	0.687069	0.180758	3.80104	0.000144092	0.00112992	Tnfrsf21	HANDPHALANGES1	HANDPHALANGES3
ENSMUSG00000095576	38.4814	2.27675	0.599006	3.80088	0.000144186	0.0011302	Fmo6	HANDPHALANGES1	HANDPHALANGES3
ENSMUSG00000038415	418.432	-0.781999	0.20575	-3.80071	0.000144279	0.00113049	Foxq1	HANDPHALANGES1	HANDPHALANGES3
ENSMUSG00000001435	1432	0.697131	0.183492	3.79924	0.000145143	0.00113495	Col18a1	HANDPHALANGES1	HANDPHALANGES3
ENSMUSG00000025591	383.398	-0.591124	0.155594	-3.79915	0.000145191	0.00113495	Tma16	HANDPHALANGES1	HANDPHALANGES3
ENSMUSG00000034951	786.453	0.722619	0.190336	3.79653	0.000146734	0.00114539	Cog7	HANDPHALANGES1	HANDPHALANGES3
ENSMUSG00000046834	4153.93	-3.10452	0.817734	-3.79649	0.000146758	0.00114539	Krt1	HANDPHALANGES1	HANDPHALANGES3
ENSMUSG00000006335	336.203	-0.616566	0.162455	-3.7953	0.000147466	0.00115047	Tfpt	HANDPHALANGES1	HANDPHALANGES3
ENSMUSG00000038776	340.649	-0.585562	0.154296	-3.79506	0.000147606	0.00115111	Ephx1	HANDPHALANGES1	HANDPHALANGES3
ENSMUSG00000022212	13.538	4.08888	1.0775	3.79479	0.000147769	0.00115193	Cpne6	HANDPHALANGES1	HANDPHALANGES3
ENSMUSG00000026167	35.2304	-2.59689	0.684871	-3.79179	0.000149565	0.00116455	Wnt10a	HANDPHALANGES1	HANDPHALANGES3
ENSMUSG00000036931	38.8056	1.76017	0.46442	3.79004	0.000150626	0.00117052	Nfkbid	HANDPHALANGES1	HANDPHALANGES3
ENSMUSG00000056938	295.017	-0.670508	0.177002	-3.78814	0.000151779	0.00117764	Acbd4	HANDPHALANGES1	HANDPHALANGES3
ENSMUSG00000059901	329.787	1.00683	0.265797	3.78797	0.000151885	0.001178	Adamts14	HANDPHALANGES1	HANDPHALANGES3
ENSMUSG00000102277	56.2822	-1.24815	0.329583	-3.78706	0.000152441	0.00118185	A130050O07Rik	HANDPHALANGES1	HANDPHALANGES3
ENSMUSG00000035049	317.174	0.69755	0.184198	3.78696	0.000152501	0.00118186	Rrp12	HANDPHALANGES1	HANDPHALANGES3
ENSMUSG00000052151	569.781	-0.58335	0.1541	-3.78554	0.000153378	0.00118818	Plpp2	HANDPHALANGES1	HANDPHALANGES3
ENSMUSG00000050335	1664.46	-0.818187	0.216221	-3.78403	0.000154311	0.00119495	Lgals3	HANDPHALANGES1	HANDPHALANGES3
ENSMUSG00000032501	335.988	0.733027	0.193764	3.7831	0.000154888	0.00119848	Trib1	HANDPHALANGES1	HANDPHALANGES3
ENSMUSG00000063531	624.075	0.782878	0.207034	3.78141	0.000155945	0.00120567	Sema3e	HANDPHALANGES1	HANDPHALANGES3
ENSMUSG00000096914	4.8148	5.74529	1.51953	3.78096	0.000156224	0.00120694	Galntl6	HANDPHALANGES1	HANDPHALANGES3
ENSMUSG00000016495	541.384	-0.591365	0.156495	-3.77882	0.00015757	0.00121639	Plgrkt	HANDPHALANGES1	HANDPHALANGES3
ENSMUSG00000028329	257.838	-0.6139	0.162471	-3.77852	0.000157762	0.0012174	Xpa	HANDPHALANGES1	HANDPHALANGES3
ENSMUSG00000010911	772.21	-0.589834	0.156213	-3.77583	0.000159475	0.00122823	Apip	HANDPHALANGES1	HANDPHALANGES3
ENSMUSG00000016552	255.034	0.692374	0.183395	3.77531	0.000159811	0.00123012	Foxred2	HANDPHALANGES1	HANDPHALANGES3
ENSMUSG00000028295	295.692	-0.778056	0.206094	-3.77526	0.000159844	0.00123012	Smim8	HANDPHALANGES1	HANDPHALANGES3
ENSMUSG00000027347	19.7605	-4.00455	1.06076	-3.77515	0.000159908	0.00123014	Rasgrp1	HANDPHALANGES1	HANDPHALANGES3
ENSMUSG00000118642	223.037	-1.10587	0.292945	-3.775	0.000160009	0.00123043	NA	HANDPHALANGES1	HANDPHALANGES3
ENSMUSG00000031932	73.9113	1.9355	0.512932	3.7734	0.000161036	0.00123785	Gpr83	HANDPHALANGES1	HANDPHALANGES3
ENSMUSG00000040620	653.77	0.72192	0.191332	3.77312	0.000161218	0.00123829	Dhx33	HANDPHALANGES1	HANDPHALANGES3
ENSMUSG00000074283	193.228	1.06991	0.283614	3.77241	0.000161675	0.00124036	Zfp109	HANDPHALANGES1	HANDPHALANGES3
ENSMUSG00000020263	2193.55	0.705561	0.187252	3.76797	0.000164583	0.00126072	Appl2	HANDPHALANGES1	HANDPHALANGES3
ENSMUSG00000029866	34.5919	-2.94679	0.782109	-3.76774	0.00016473	0.00126137	Kel	HANDPHALANGES1	HANDPHALANGES3
ENSMUSG00000075391	260.621	-0.69762	0.185291	-3.76499	0.000166554	0.00127434	Glo1-ps	HANDPHALANGES1	HANDPHALANGES3
ENSMUSG00000068373	76.3643	1.69909	0.451366	3.76432	0.000167003	0.00127729	D430041D05Rik	HANDPHALANGES1	HANDPHALANGES3
ENSMUSG00000020654	883.99	0.753331	0.200184	3.7632	0.000167752	0.00128153	Adcy3	HANDPHALANGES1	HANDPHALANGES3
ENSMUSG00000024347	25.294	2.96168	0.787352	3.76157	0.00016885	0.00128893	Psd2	HANDPHALANGES1	HANDPHALANGES3
ENSMUSG00000082229	16.1001	3.9281	1.04468	3.76011	0.000169839	0.00129449	Nap1l2	HANDPHALANGES1	HANDPHALANGES3
ENSMUSG00000033508	1140.04	-2.85887	0.760503	-3.75918	0.000170471	0.00129804	Asprv1	HANDPHALANGES1	HANDPHALANGES3
ENSMUSG00000046805	113.524	1.03861	0.276357	3.75824	0.000171116	0.00130173	Mpeg1	HANDPHALANGES1	HANDPHALANGES3
ENSMUSG00000025348	44.5545	1.80183	0.479578	3.75712	0.000171883	0.00130656	Itga7	HANDPHALANGES1	HANDPHALANGES3
ENSMUSG00000027859	146.723	-1.23917	0.329945	-3.75567	0.000172875	0.0013136	Ngf	HANDPHALANGES1	HANDPHALANGES3
ENSMUSG00000036676	509.347	0.698751	0.186103	3.75464	0.00017359	0.00131853	Tmtc3	HANDPHALANGES1	HANDPHALANGES3
ENSMUSG00000080242	394.328	-0.686457	0.182865	-3.7539	0.000174101	0.0013219	Atp6v0c-ps2	HANDPHALANGES1	HANDPHALANGES3
ENSMUSG00000032496	10.7019	4.89016	1.30297	3.75309	0.000174667	0.00132468	Ltf	HANDPHALANGES1	HANDPHALANGES3
ENSMUSG00000009246	1566.08	0.596914	0.159126	3.7512	0.000175993	0.00133233	Trpm5	HANDPHALANGES1	HANDPHALANGES3
ENSMUSG00000057914	223.7	0.738546	0.19688	3.75124	0.00017596	0.00133233	Cacnb2	HANDPHALANGES1	HANDPHALANGES3
ENSMUSG00000082536	463.273	-0.583155	0.155534	-3.74937	0.000177281	0.00134143	Gm13456	HANDPHALANGES1	HANDPHALANGES3
ENSMUSG00000043969	98.7877	1.08083	0.288289	3.74911	0.000177464	0.00134231	Emx2	HANDPHALANGES1	HANDPHALANGES3
ENSMUSG00000026640	332.472	-0.71214	0.19002	-3.74771	0.000178459	0.00134777	Plxna2	HANDPHALANGES1	HANDPHALANGES3
ENSMUSG00000032679	457.254	-0.593854	0.158539	-3.74579	0.000179829	0.00135657	Cd59a	HANDPHALANGES1	HANDPHALANGES3
ENSMUSG00000071719	26.6763	2.94243	0.78552	3.74584	0.00017979	0.00135657	Nalf2	HANDPHALANGES1	HANDPHALANGES3
ENSMUSG00000032403	296.114	-0.630333	0.168332	-3.74459	0.000180691	0.00136013	2300009A05Rik	HANDPHALANGES1	HANDPHALANGES3
ENSMUSG00000042962	202.014	-1.02443	0.273578	-3.74456	0.000180713	0.00136013	Gm5436	HANDPHALANGES1	HANDPHALANGES3
ENSMUSG00000113948	79.8481	-1.25698	0.335682	-3.74454	0.000180721	0.00136013	Rpl17-ps3	HANDPHALANGES1	HANDPHALANGES3
ENSMUSG00000109539	56.9784	-1.14706	0.306384	-3.74385	0.000181225	0.00136244	Gm44667	HANDPHALANGES1	HANDPHALANGES3
ENSMUSG00000063919	19.6918	-2.89654	0.77374	-3.74356	0.00018143	0.00136347	Srrm4	HANDPHALANGES1	HANDPHALANGES3
ENSMUSG00000024302	112.716	0.923437	0.246753	3.74235	0.000182305	0.00136909	Dtna	HANDPHALANGES1	HANDPHALANGES3
ENSMUSG00000037014	24.1029	2.20796	0.590129	3.74149	0.000182935	0.00137322	Sstr4	HANDPHALANGES1	HANDPHALANGES3
ENSMUSG00000055044	286.253	-0.985841	0.263849	-3.73639	0.000186683	0.00139661	Pdlim1	HANDPHALANGES1	HANDPHALANGES3
ENSMUSG00000030518	714.738	0.875423	0.234437	3.73415	0.000188347	0.00140747	Entrep2	HANDPHALANGES1	HANDPHALANGES3
[truncated: 64,167 more rows]

## Sheet: WGCNA Modules
ensembl_gene_id	mgi_symbol	cluster
ENSMUSG00000000275	Trim25	0
ENSMUSG00000000409	Lck	0
ENSMUSG00000000562	Adora3	0
ENSMUSG00000000708	Kat2b	0
ENSMUSG00000000731	Aire	0
ENSMUSG00000000861	Bcl11a	0
ENSMUSG00000001014	Icam4	0
ENSMUSG00000001021	S100a3	0
ENSMUSG00000001211	Agpat3	0
ENSMUSG00000001504	Irx2	0
ENSMUSG00000001558	Klhl10	0
ENSMUSG00000001656	Hoxc11	0
ENSMUSG00000001663	Gstt1	0
ENSMUSG00000002076	Hsf2bp	0
ENSMUSG00000002699	Lcp2	0
ENSMUSG00000003206	Ebi3	0
ENSMUSG00000003228	Grk5	0
ENSMUSG00000003436	Dll3	0
ENSMUSG00000003974	Grm3	0
ENSMUSG00000004415	Col26a1	0
ENSMUSG00000004552	Ctse	0
ENSMUSG00000004707	Ly9	0
ENSMUSG00000005043	Sgsh	0
ENSMUSG00000005089	Slc1a2	0
ENSMUSG00000005268	Prlr	0
ENSMUSG00000005373	Mlxipl	0
ENSMUSG00000005413	Hmox1	0
ENSMUSG00000005696	Sh2d1a	0
ENSMUSG00000006221	Hspb7	0
ENSMUSG00000006235	Epor	0
ENSMUSG00000006389	Mpl	0
ENSMUSG00000006574	Slc4a1	0
ENSMUSG00000006675	P4htm	0
ENSMUSG00000007440	Pcdha10	0
ENSMUSG00000007682	Dio2	0
ENSMUSG00000007888	Crlf1	0
ENSMUSG00000008575	Nfib	0
ENSMUSG00000009350	Mpo	0
ENSMUSG00000009585	Apobec3	0
ENSMUSG00000009628	Tex15	0
ENSMUSG00000009654	Oit3	0
ENSMUSG00000009670	Tex11	0
ENSMUSG00000010021	Kif19a	0
ENSMUSG00000010311	Optc	0
ENSMUSG00000010358	Ifi35	0
ENSMUSG00000011752	Pgam1	0
ENSMUSG00000012519	Mlkl	0
ENSMUSG00000012819	Cdh23	0
ENSMUSG00000013707	Tnfaip8l2	0
ENSMUSG00000014164	Klhl3	0
ENSMUSG00000014791	Elmo3	0
ENSMUSG00000015133	Lrrk1	0
ENSMUSG00000015222	Map2	0
ENSMUSG00000015312	Gadd45b	0
ENSMUSG00000015467	Egfl8	0
ENSMUSG00000015501	Hivep2	0
ENSMUSG00000015970	Chdh	0
ENSMUSG00000016477	E2f3	0
ENSMUSG00000016496	Cd274	0
ENSMUSG00000017400	Stac2	0
ENSMUSG00000018169	Mfng	0
ENSMUSG00000018263	Tbx5	0
ENSMUSG00000019852	Arfgef3	0
ENSMUSG00000019932	Kera	0
ENSMUSG00000019942	Cdk1	0
ENSMUSG00000019966	Kitl	0
ENSMUSG00000019997	Ccn2	0
ENSMUSG00000020019	Ntn4	0
ENSMUSG00000020020	Usp44	0
ENSMUSG00000020027	Socs2	0
ENSMUSG00000020052	Ascl1	0
ENSMUSG00000020178	Adora2a	0
ENSMUSG00000020228	Helb	0
ENSMUSG00000020275	Rel	0
ENSMUSG00000020309	Chac2	0
ENSMUSG00000020327	Fgf22	0
ENSMUSG00000020354	Sgcd	0
ENSMUSG00000020598	Nrcam	0
ENSMUSG00000020641	Rsad2	0
ENSMUSG00000020743	Mif4gd	0
ENSMUSG00000020787	P2rx1	0
ENSMUSG00000020808	Pimreg	0
ENSMUSG00000020838	Slc6a4	0
ENSMUSG00000021061	Sptb	0
ENSMUSG00000021071	Trim9	0
ENSMUSG00000021090	Lrrc9	0
ENSMUSG00000021102	Glrx5	0
ENSMUSG00000021176	Efcab11	0
ENSMUSG00000021185	Dglucy	0
ENSMUSG00000021217	Tshz3	0
ENSMUSG00000021226	Acot2	0
ENSMUSG00000021260	Hhipl1	0
ENSMUSG00000021275	Tecpr2	0
ENSMUSG00000021280	Exoc3l4	0
ENSMUSG00000021313	Ryr2	0
ENSMUSG00000021314	Amph	0
ENSMUSG00000021367	Edn1	0
ENSMUSG00000021373	Cap2	0
ENSMUSG00000021379	Id4	0
ENSMUSG00000021381	Barx1	0
ENSMUSG00000021573	Tppp	0
ENSMUSG00000021619	Atg10	0
ENSMUSG00000021719	Rgs7bp	0
ENSMUSG00000021779	Thrb	0
ENSMUSG00000021886	Gpr65	0
ENSMUSG00000021944	Gata4	0
ENSMUSG00000022010	Tsc22d1	0
ENSMUSG00000022015	Tnfsf11	0
ENSMUSG00000022044	Stmn4	0
ENSMUSG00000022099	Dmtn	0
ENSMUSG00000022108	Itm2b	0
ENSMUSG00000022114	Spry2	0
ENSMUSG00000022180	Slc7a8	0
ENSMUSG00000022206	Npr3	0
ENSMUSG00000022217	Emc9	0
ENSMUSG00000022270	Retreg1	0
ENSMUSG00000022306	Zfpm2	0
ENSMUSG00000022431	Ribc2	0
ENSMUSG00000022484	Hoxc10	0
ENSMUSG00000022523	Fgf12	0
ENSMUSG00000022659	Gcsam	0
ENSMUSG00000022790	Igsf11	0
ENSMUSG00000022842	Ece2	0
ENSMUSG00000022941	Ripply3	0
ENSMUSG00000023000	Dhh	0
ENSMUSG00000023046	Igfbp6	0
ENSMUSG00000023092	Fhl1	0
ENSMUSG00000023473	Celsr3	0
ENSMUSG00000023484	Prph	0
ENSMUSG00000023868	Pde10a	0
ENSMUSG00000023912	Slc25a27	0
ENSMUSG00000023926	Rhag	0
ENSMUSG00000023959	Clic5	0
ENSMUSG00000023992	Trem2	0
ENSMUSG00000023994	Nfya	0
ENSMUSG00000024011	Pi16	0
ENSMUSG00000024049	Myom1	0
ENSMUSG00000024059	Clip4	0
ENSMUSG00000024065	Ehd3	0
ENSMUSG00000024076	Vit	0
ENSMUSG00000024109	Nrxn1	0
ENSMUSG00000024134	Six2	0
ENSMUSG00000024140	Epas1	0
ENSMUSG00000024168	Tmem204	0
ENSMUSG00000024235	Map3k8	0
ENSMUSG00000024301	Kifc5b	0
ENSMUSG00000024339	Tap2	0
ENSMUSG00000024395	Lims2	0
ENSMUSG00000024456	Diaph1	0
ENSMUSG00000024486	Hbegf	0
ENSMUSG00000024565	Sall3	0
ENSMUSG00000024593	Megf10	0
ENSMUSG00000024663	Rab3il1	0
ENSMUSG00000024670	Cd6	0
ENSMUSG00000024743	Syt7	0
ENSMUSG00000024910	Ctsw	0
ENSMUSG00000024987	Cyp26a1	0
ENSMUSG00000025020	Slit1	0
ENSMUSG00000025081	Tdrd1	0
ENSMUSG00000025105	Bnc1	0
ENSMUSG00000025171	Ubtd1	0
ENSMUSG00000025175	Fn3k	0
ENSMUSG00000025189	Cnnm1	0
ENSMUSG00000025270	Alas2	0
ENSMUSG00000025480	Syce1	0
ENSMUSG00000025489	Ifitm5	0
ENSMUSG00000025558	Dock9	0
ENSMUSG00000025574	Tk1	0
ENSMUSG00000025701	Alox5	0
ENSMUSG00000025757	Hspa4l	0
ENSMUSG00000025777	Gdap1	0
ENSMUSG00000025889	Snca	0
ENSMUSG00000025905	Oprk1	0
ENSMUSG00000025915	Sgk3	0
ENSMUSG00000026009	Icos	0
ENSMUSG00000026069	Il1rl1	0
ENSMUSG00000026197	Zfand2b	0
ENSMUSG00000026220	Slc16a14	0
ENSMUSG00000026227	2810459M11Rik	0
ENSMUSG00000026241	Nppc	0
ENSMUSG00000026247	Ecel1	0
ENSMUSG00000026249	Serpine2	0
ENSMUSG00000026288	Inpp5d	0
ENSMUSG00000026308	Klhl30	0
ENSMUSG00000026311	Asb1	0
ENSMUSG00000026360	Rgs2	0
ENSMUSG00000026435	Slc45a3	0
ENSMUSG00000026495	Efcab2	0
ENSMUSG00000026532	Spta1	0
ENSMUSG00000026564	Styxl2	0
ENSMUSG00000026571	Dcaf6	0
ENSMUSG00000026605	Cenpf	0
ENSMUSG00000026610	Esrrg	0
ENSMUSG00000026630	Batf3	0
ENSMUSG00000026679	Enkur	0
ENSMUSG00000026748	Plxdc2	0
ENSMUSG00000026832	Cytip	0
ENSMUSG00000026841	Fibcd1	0
ENSMUSG00000026893	Gca	0
ENSMUSG00000026956	Uap1l1	0
ENSMUSG00000026991	Pkp4	0
ENSMUSG00000027078	Ube2l6	0
ENSMUSG00000027175	Tcp11l1	0
ENSMUSG00000027358	Bmp2	0
ENSMUSG00000027359	Slc27a2	0
ENSMUSG00000027360	Hdc	0
ENSMUSG00000027419	Pcsk2	0
ENSMUSG00000027508	Pag1	0
ENSMUSG00000027513	Pck1	0
ENSMUSG00000027536	Chmp4c	0
ENSMUSG00000027562	Car2	0
ENSMUSG00000027800	Tm4sf1	0
ENSMUSG00000027855	Sycp1	0
ENSMUSG00000027869	Hsd3b6	0
ENSMUSG00000027938	Creb3l4	0
ENSMUSG00000027995	Tlr2	0
ENSMUSG00000027999	Pla2g12a	0
ENSMUSG00000028004	Npy2r	0
ENSMUSG00000028037	Ifi44	0
ENSMUSG00000028042	Zbtb7b	0
ENSMUSG00000028072	Ntrk1	0
ENSMUSG00000028179	Cth	0
ENSMUSG00000028197	Col24a1	0
ENSMUSG00000028222	Calb1	0
ENSMUSG00000028310	Ppp3r2	0
ENSMUSG00000028337	Coro2a	0
ENSMUSG00000028360	Slc44a5	0
ENSMUSG00000028391	Wdr31	0
ENSMUSG00000028496	Mllt3	0
ENSMUSG00000028551	Cdkn2c	0
ENSMUSG00000028565	Nfia	0
ENSMUSG00000028600	Podn	0
ENSMUSG00000028619	Tceanc2	0
ENSMUSG00000028631	Kcnq4	0
ENSMUSG00000028645	Slc2a1	0
ENSMUSG00000028730	Cfap57	0
ENSMUSG00000028803	Nipal3	0
ENSMUSG00000028864	Hgf	0
ENSMUSG00000028874	Fgr	0
ENSMUSG00000028970	Abcb1b	0
ENSMUSG00000029032	Arhgef16	0
ENSMUSG00000029108	Pcdh7	0
ENSMUSG00000029153	Ociad2	0
ENSMUSG00000029167	Ppargc1a	0
ENSMUSG00000029189	Sel1l3	0
ENSMUSG00000029204	Rhoh	0
ENSMUSG00000029279	Brdt	0
ENSMUSG00000029306	Ibsp	0
ENSMUSG00000029313	Aff1	0
ENSMUSG00000029359	Tesc	0
ENSMUSG00000029368	Alb	0
ENSMUSG00000029372	Ppbp	0
ENSMUSG00000029402	Snrnp35	0
ENSMUSG00000029408	Abcb9	0
ENSMUSG00000029420	Rimbp2	0
ENSMUSG00000029544	Cabp1	0
ENSMUSG00000029830	Svopl	0
ENSMUSG00000029838	Ptn	0
ENSMUSG00000029866	Kel	0
ENSMUSG00000030170	Wnt5b	0
ENSMUSG00000030208	Emp1	0
ENSMUSG00000030255	Sspn	0
ENSMUSG00000030276	Ttll3	0
ENSMUSG00000030346	Rad51ap1	0
ENSMUSG00000030380	Mzf1	0
ENSMUSG00000030401	Rtn2	0
ENSMUSG00000030406	Gipr	0
ENSMUSG00000030433	Sbk2	0
ENSMUSG00000030474	Siglece	0
ENSMUSG00000030592	Ryr1	0
ENSMUSG00000030605	Mfge8	0
ENSMUSG00000030623	Prss23os	0
ENSMUSG00000030786	Itgam	0
ENSMUSG00000030800	Prss8	0
ENSMUSG00000030834	Abcc6	0
ENSMUSG00000030889	Vwa3a	0
ENSMUSG00000031027	Stk33	0
ENSMUSG00000031111	Igsf1	0
ENSMUSG00000031125	3830403N18Rik	0
ENSMUSG00000031165	Was	0
ENSMUSG00000031220	Awat2	0
ENSMUSG00000031250	Tnmd	0
ENSMUSG00000031266	Gla	0
ENSMUSG00000031355	Arhgap6	0
ENSMUSG00000031373	Car5b	0
ENSMUSG00000031375	Bgn	0
ENSMUSG00000031618	Nr3c2	0
ENSMUSG00000031627	Irf2	0
ENSMUSG00000031750	Il34	0
ENSMUSG00000031803	B3gnt3	0
ENSMUSG00000031845	Bco1	0
ENSMUSG00000031853	Map3k21	0
ENSMUSG00000031871	Cdh5	0
ENSMUSG00000031886	Ces2e	0
ENSMUSG00000031970	Dbndd1	0
ENSMUSG00000032011	Thy1	0
ENSMUSG00000032085	Tagln	0
ENSMUSG00000032204	Aqp9	0
ENSMUSG00000032323	Cyp11a1	0
ENSMUSG00000032332	Col12a1	0
ENSMUSG00000032338	Hcn4	0
ENSMUSG00000032356	Rasgrf1	0
ENSMUSG00000032452	Clstn2	0
ENSMUSG00000032656	Marchf3	0
ENSMUSG00000032776	Mctp2	0
ENSMUSG00000032854	Ugt8a	0
ENSMUSG00000032890	Rims3	0
ENSMUSG00000032899	Styk1	0
ENSMUSG00000032925	Itgbl1	0
ENSMUSG00000032948	Lipi	0
ENSMUSG00000033220	Rac2	0
ENSMUSG00000033420	Antxr1	0
ENSMUSG00000033569	Adgrb3	0
ENSMUSG00000033590	Myo5c	0
ENSMUSG00000033595	Lgi3	0
ENSMUSG00000033644	Piwil2	0
ENSMUSG00000033685	Ucp2	0
ENSMUSG00000034098	Fstl5	0
ENSMUSG00000034266	Batf	0
ENSMUSG00000034271	Jdp2	0
ENSMUSG00000034275	Igsf9b	0
ENSMUSG00000034336	Ina	0
ENSMUSG00000034353	Ramp1	0
ENSMUSG00000034394	Lif	0
ENSMUSG00000034486	Gbx2	0
ENSMUSG00000034613	Ppm1h	0
ENSMUSG00000034641	Cd300ld	0
ENSMUSG00000034686	Prr7	0
ENSMUSG00000034813	Grip1	0
ENSMUSG00000034833	Tespa1	0
ENSMUSG00000034959	Rubcnl	0
ENSMUSG00000034981	Parm1	0
ENSMUSG00000035069	Oma1	0
ENSMUSG00000035200	Chrnb4	0
ENSMUSG00000035236	Scai	0
ENSMUSG00000035273	Hpse	0
ENSMUSG00000035285	Nat14	0
ENSMUSG00000035356	Nfkbiz	0
ENSMUSG00000035365	Parpbp	0
ENSMUSG00000035435	Abca17	0
ENSMUSG00000035441	Myo1d	0
ENSMUSG00000035456	Prdm8	0
ENSMUSG00000035472	Slc25a21	0
ENSMUSG00000035615	Frmpd1	0
ENSMUSG00000035681	Kcnc2	0
ENSMUSG00000035686	Thrsp	0
ENSMUSG00000035694	Caps2	0
ENSMUSG00000035954	Dock4	0
ENSMUSG00000035964	Tmem59l	0
ENSMUSG00000036218	Pdzrn4	0
ENSMUSG00000036278	Macrod1	0
ENSMUSG00000036334	Igsf10	0
ENSMUSG00000036353	P2ry12	0
ENSMUSG00000036362	P2ry13	0
ENSMUSG00000036452	Arhgap26	0
ENSMUSG00000036492	Rnf39	0
ENSMUSG00000036510	Cdh8	0
ENSMUSG00000036545	Adamts2	0
ENSMUSG00000036602	Alx1	0
ENSMUSG00000036661	Dennd3	0
ENSMUSG00000036760	Kcnk9	0
ENSMUSG00000036834	Plch1	0
ENSMUSG00000036880	Acaa2	0
ENSMUSG00000036923	Stox1	0
ENSMUSG00000037034	Pax1	0
ENSMUSG00000037049	Smpd1	0
ENSMUSG00000037143	Cfap61	0
ENSMUSG00000037148	Arhgap10	0
ENSMUSG00000037254	Itih2	0
ENSMUSG00000037321	Tap1	0
ENSMUSG00000037335	Hand1	0
ENSMUSG00000037336	Mfsd2b	0
ENSMUSG00000037375	Hhat	0
ENSMUSG00000037446	Tulp1	0
ENSMUSG00000037594	Clba1	0
ENSMUSG00000037653	Kctd8	0
ENSMUSG00000037685	Atp8a1	0
ENSMUSG00000037705	Tecta	0
ENSMUSG00000037752	Xkr8	0
ENSMUSG00000037904	Ankrd9	0
ENSMUSG00000038024	Dennd4c	0
ENSMUSG00000038037	Socs1	0
ENSMUSG00000038060	Dlec1	0
ENSMUSG00000038085	Cnbd2	0
ENSMUSG00000038155	Gstp2	0
ENSMUSG00000038192	Cer1	0
ENSMUSG00000038213	Tapbpl	0
ENSMUSG00000038422	Hdhd3	0
ENSMUSG00000038453	Srcin1	0
ENSMUSG00000038473	Nos1ap	0
ENSMUSG00000038521	C1s1	0
ENSMUSG00000038537	Mc3r	0
ENSMUSG00000038555	Reep2	0
ENSMUSG00000038807	Rap1gap2	0
ENSMUSG00000038859	Baiap2l1	0
ENSMUSG00000039021	Ttc16	0
ENSMUSG00000039063	Echdc3	0
ENSMUSG00000039081	Zfp503	0
ENSMUSG00000039103	Nexn	0
ENSMUSG00000039108	Lsm14b	0
ENSMUSG00000039114	Nrn1	0
ENSMUSG00000039117	Taf4	0
ENSMUSG00000039126	Prune2	0
ENSMUSG00000039156	Stim2	0
ENSMUSG00000039198	Ptchd3	0
ENSMUSG00000039236	Isg20	0
ENSMUSG00000039257	Vstm2b	0
ENSMUSG00000039405	Prss23	0
ENSMUSG00000039488	Cntn5	0
ENSMUSG00000039620	Trmt9b	0
ENSMUSG00000039648	Kyat1	0
ENSMUSG00000039701	Usp53	0
ENSMUSG00000039886	Tmem120a	0
ENSMUSG00000039903	Eva1c	0
ENSMUSG00000039981	Zc3h12d	0
ENSMUSG00000039982	Dtx4	0
ENSMUSG00000040118	Cacna2d1	0
ENSMUSG00000040412	Elapor1	0
ENSMUSG00000040434	Large2	0
ENSMUSG00000040624	Plekhg1	0
ENSMUSG00000040697	Dnajc16	0
ENSMUSG00000040726	Hesx1	0
ENSMUSG00000040938	Slc16a11	0
ENSMUSG00000041012	Cmtm8	0
ENSMUSG00000041132	N4bp2l1	0
ENSMUSG00000041351	Rap1gap	0
ENSMUSG00000041378	Cldn5	0
ENSMUSG00000041390	Mdfic	0
ENSMUSG00000041423	Paqr6	0
ENSMUSG00000041476	Smpx	0
ENSMUSG00000041477	Dcp1b	0
ENSMUSG00000041479	Syt15	0
ENSMUSG00000041596	Nlrp5-ps	0
ENSMUSG00000041674	BC006965	0
ENSMUSG00000041695	Kcnj2	0
ENSMUSG00000041735	AAdacl4fm3	0
ENSMUSG00000041852	Tcf20	0
ENSMUSG00000042286	Stab1	0
ENSMUSG00000042320	Prox2	0
ENSMUSG00000042333	Tnfrsf14	0
ENSMUSG00000042353	Frem3	0
ENSMUSG00000042671	Rgs8	0
ENSMUSG00000042784	Muc1	0
ENSMUSG00000042793	Lgr6	0
ENSMUSG00000042797	Aqp11	0
ENSMUSG00000042821	Snai1	0
ENSMUSG00000042895	Abra	0
ENSMUSG00000042942	Greb1l	0
ENSMUSG00000043557	Mdga1	0
ENSMUSG00000043629	1700019D03Rik	0
ENSMUSG00000043631	Ecm2	0
ENSMUSG00000043671	Dpy19l3	0
ENSMUSG00000043673	Kcns3	0
ENSMUSG00000043740	Trem6l	0
ENSMUSG00000043760	Pkhd1	0
ENSMUSG00000043789	Vwce	0
ENSMUSG00000043811	Rtn4r	0
ENSMUSG00000043953	Ccrl2	0
ENSMUSG00000044043	Pcdhb14	0
ENSMUSG00000044147	Arf6	0
ENSMUSG00000044164	Rnf182	0
ENSMUSG00000044172	Ptx4	0
ENSMUSG00000044211	Gm7887	0
ENSMUSG00000044317	Gpr4	0
ENSMUSG00000044468	Tent5c	0
ENSMUSG00000044921	Rassf9	0
ENSMUSG00000044966	Fbxo48	0
ENSMUSG00000044976	Wdr72	0
ENSMUSG00000044997	E130304I02Rik	0
ENSMUSG00000045005	Fzd5	0
ENSMUSG00000045010	Gm4779	0
ENSMUSG00000045404	Kcnk13	0
ENSMUSG00000045679	Slc66a3	0
ENSMUSG00000045954	Cavin2	0
ENSMUSG00000046080	Clec9a	0
ENSMUSG00000046167	Gldn	0
ENSMUSG00000046191	Pcdhb20	0
ENSMUSG00000046204	Pnma2	0
ENSMUSG00000046607	Hrk	0
ENSMUSG00000046637	Ttc34	0
ENSMUSG00000046699	Slitrk4	0
ENSMUSG00000046806	Cyren	0
ENSMUSG00000046879	Irgm1	0
ENSMUSG00000047230	Cldn2	0
ENSMUSG00000047261	Gap43	0
ENSMUSG00000047443	Erfe	0
ENSMUSG00000047789	Slc38a9	0
ENSMUSG00000047842	Diras2	0
ENSMUSG00000047867	Gimap6	0
ENSMUSG00000047992	Dipk1c	0
ENSMUSG00000048078	Tenm4	0
ENSMUSG00000048218	Amigo2	0
ENSMUSG00000048249	Crebrf	0
ENSMUSG00000048330	Ric3	0
ENSMUSG00000048355	Arxes1	0
ENSMUSG00000048572	Tmem252	0
ENSMUSG00000048612	Myof	0
ENSMUSG00000048616	Nog	0
ENSMUSG00000048779	P2ry6	0
ENSMUSG00000048807	Slc35e4	0
ENSMUSG00000048938	Nr1h5	0
ENSMUSG00000049092	Gpr137c	0
ENSMUSG00000049097	Ankrd34a	0
ENSMUSG00000049103	Ccr2	0
ENSMUSG00000049422	Chchd10	0
ENSMUSG00000049588	Ccdc69	0
ENSMUSG00000049676	Catsperg1	0
ENSMUSG00000049691	Nkx3-2	0
ENSMUSG00000049709	Nlrp10	0
ENSMUSG00000049728	Zfp668	0
ENSMUSG00000049744	Arhgap15	0
ENSMUSG00000049985	Ankrd55	0
ENSMUSG00000050315	Synpo2	0
ENSMUSG00000050423	Ppp1r3g	0
ENSMUSG00000050612	Txndc2	0
ENSMUSG00000050675	Gp1ba	0
ENSMUSG00000050711	Scg2	0
ENSMUSG00000050783	Htr1f	0
ENSMUSG00000050947	Amigo1	0
ENSMUSG00000050974	Gm9847	0
ENSMUSG00000051111	Sv2c	0
ENSMUSG00000051147	Nat2	0
ENSMUSG00000051176	Zfp42	0
ENSMUSG00000051184	Zfp524	0
ENSMUSG00000051225	Fam83a	0
ENSMUSG00000051262	Nat8f3	0
ENSMUSG00000051335	Gfod1	0
ENSMUSG00000051354	Samd3	0
ENSMUSG00000051435	Fhad1	0
ENSMUSG00000051506	Wdfy4	0
ENSMUSG00000051596	Otop1	0
ENSMUSG00000051839	Gypa	0
ENSMUSG00000051998	Lax1	0
ENSMUSG00000052013	Btla	0
ENSMUSG00000052187	Hbb-y	0
ENSMUSG00000052248	Zeb2os	0
ENSMUSG00000052305	Hbb-bs	0
ENSMUSG00000052496	Pkdrej	0
ENSMUSG00000052673	Gm9887	0
ENSMUSG00000052726	Kcnt2	0
ENSMUSG00000052914	Cyp2j6	0
ENSMUSG00000053030	Spink2	0
ENSMUSG00000053040	Aph1c	0
ENSMUSG00000053070	Cfap300	0
ENSMUSG00000053113	Socs3	0
ENSMUSG00000053166	Cdh22	0
ENSMUSG00000053297	AI854703	0
ENSMUSG00000053358	Gm9905	0
ENSMUSG00000053441	Adamts19	0
ENSMUSG00000053559	Smagp	0
ENSMUSG00000053613	Notumos	0
ENSMUSG00000053821	Gm9922	0
ENSMUSG00000053889	Kirrel3os	0
ENSMUSG00000053914	Kdm4d	0
ENSMUSG00000053963	Stum	0
ENSMUSG00000054191	Klf1	0
ENSMUSG00000054200	Ffar4	0
ENSMUSG00000054293	P2ry10b	0
ENSMUSG00000054404	Slfn5	0
ENSMUSG00000054423	Cadps	0
ENSMUSG00000054452	Tle5	0
ENSMUSG00000054455	Vapb	0
ENSMUSG00000054459	Vsnl1	0
ENSMUSG00000054499	Dedd2	0
ENSMUSG00000054612	Mgmt	0
ENSMUSG00000055022	Cntn1	0
ENSMUSG00000055172	C1ra	0
ENSMUSG00000055312	Them7	0
ENSMUSG00000055341	Zfp457	0
ENSMUSG00000055407	Map6	0
ENSMUSG00000055541	Lair1	0
ENSMUSG00000055555	Ct55	0
ENSMUSG00000055609	Hba-x	0
ENSMUSG00000055691	Gja6	0
ENSMUSG00000055912	Tmem150a	0
ENSMUSG00000055945	Prr18	0
ENSMUSG00000055978	Fut2	0
ENSMUSG00000056054	S100a8	0
ENSMUSG00000056071	S100a9	0
ENSMUSG00000056148	Rdh9	0
ENSMUSG00000056313	Tcim	0
ENSMUSG00000056501	Cebpb	0
ENSMUSG00000056569	Mpz	0
ENSMUSG00000056737	Capg	0
ENSMUSG00000057098	Ebf1	0
ENSMUSG00000057286	St6galnac2	0
ENSMUSG00000057666	Gapdh	0
ENSMUSG00000057836	Xlr3a	0
ENSMUSG00000057948	Unc13d	0
ENSMUSG00000058101	1700084J12Rik	0
ENSMUSG00000058248	Kcnh1	0
ENSMUSG00000058488	Kl	0
ENSMUSG00000058897	Col25a1	0
ENSMUSG00000059060	Rad51b	0
ENSMUSG00000059436	Max	0
ENSMUSG00000059554	Ccdc28a	0
ENSMUSG00000060487	Samd5	0
ENSMUSG00000060594	Layn	0
ENSMUSG00000061080	Lsamp	0
ENSMUSG00000061099	Gapdhs	0
ENSMUSG00000061171	Slc38a11	0
ENSMUSG00000061298	Agbl4	0
ENSMUSG00000061462	Obscn	0
ENSMUSG00000061601	Pclo	0
ENSMUSG00000061607	Mdc1	0
ENSMUSG00000061897	Gm14292	0
ENSMUSG00000062151	Unc13c	0
ENSMUSG00000062209	Erbb4	0
ENSMUSG00000062296	Trank1	0
ENSMUSG00000062372	Otof	0
ENSMUSG00000062391	4932435O22Rik	0
ENSMUSG00000062563	Cys1	0
ENSMUSG00000062713	Sim2	0
ENSMUSG00000063130	Calml3	0
ENSMUSG00000063193	Cd300lb	0
ENSMUSG00000063488	Zkscan7	0
ENSMUSG00000063529	Stmnd1	0
ENSMUSG00000063556	Gm10132	0
ENSMUSG00000063600	Egfem1	0
ENSMUSG00000063646	Jakmip1	0
ENSMUSG00000063856	Gpx1	0
ENSMUSG00000063935	Zar1	0
ENSMUSG00000064115	Cadm2	0
ENSMUSG00000064246	Chi3l1	0
ENSMUSG00000064262	Gimap8	0
ENSMUSG00000064329	Scn1a	0
ENSMUSG00000066058	Cldn19	0
ENSMUSG00000066632	Pgk1-rs7	0
ENSMUSG00000066721	Zfp575	0
ENSMUSG00000066842	Hmcn1	0
ENSMUSG00000067071	Hes6	0
ENSMUSG00000067578	Cbln4	0
ENSMUSG00000067860	Zic3	0
ENSMUSG00000068129	Cst7	0
ENSMUSG00000068245	Phf11d	0
ENSMUSG00000069008	Gm5537	0
ENSMUSG00000069041	Slc25a31	0
ENSMUSG00000069171	Nr2f1	0
ENSMUSG00000069308	H2bc22	0
ENSMUSG00000069378	Prdm6	0
ENSMUSG00000069763	Tmem100	0
ENSMUSG00000069792	Wfdc17	0
ENSMUSG00000069805	Fbp1	0
ENSMUSG00000069917	Hba-a2	0
ENSMUSG00000069919	Hba-a1	0
ENSMUSG00000070034	Sp110	0
ENSMUSG00000070327	Rnf213	0
ENSMUSG00000070366	Plpp4	0
ENSMUSG00000070390	Nlrp1b	0
ENSMUSG00000070427	Il18bp	0
ENSMUSG00000070498	Tmem132b	0
ENSMUSG00000070695	Cntnap5a	0
ENSMUSG00000070709	Zfp974	0
ENSMUSG00000071192	Wfikkn1	0
ENSMUSG00000071347	C1qtnf9	0
ENSMUSG00000071379	Hpcal1	0
ENSMUSG00000071398	2410004P03Rik	0
ENSMUSG00000071658	Gng3	0
ENSMUSG00000071713	Csf2rb	0
ENSMUSG00000071715	Ncf4	0
ENSMUSG00000072770	Acrbp	0
ENSMUSG00000072774	Zfp951	0
ENSMUSG00000073060	Zxda	0
ENSMUSG00000073063	Hbq1b	0
ENSMUSG00000073274	NA	0
ENSMUSG00000073295	Nudt11	0
ENSMUSG00000073400	Trim10	0
ENSMUSG00000073421	H2-Ab1	0
ENSMUSG00000073427	Gm4924	0
ENSMUSG00000073489	Ifi204	0
ENSMUSG00000073514	Dok6	0
ENSMUSG00000073656	Gm10558	0
ENSMUSG00000073728	Tmem51os1	0
ENSMUSG00000073779	Lrp8os2	0
ENSMUSG00000073802	Cdkn2b	0
ENSMUSG00000073821	8030451A03Rik	0
ENSMUSG00000073940	Hbb-bt	0
ENSMUSG00000073987	Ggh	0
ENSMUSG00000074305	Peak1	0
ENSMUSG00000074340	Ovgp1	0
ENSMUSG00000074673	Ttll9	0
ENSMUSG00000074852	Hpse2	0
ENSMUSG00000074896	Ifit3	0
ENSMUSG00000075014	NA	0
ENSMUSG00000075122	Cd80	0
ENSMUSG00000075316	Scn9a	0
ENSMUSG00000075528	Aarsd1	0
ENSMUSG00000076433	Cep295nl	0
ENSMUSG00000076438	Oxct2b	0
ENSMUSG00000078161	Erich3	0
ENSMUSG00000078240	Rpl27rt	0
ENSMUSG00000078349	AW011738	0
ENSMUSG00000078435	AU041133	0
ENSMUSG00000078444	Gm10941	0
ENSMUSG00000078521	Aunip	0
ENSMUSG00000078584	AU022252	0
ENSMUSG00000078607	1810010H24Rik	0
ENSMUSG00000078686	Mup9	0
ENSMUSG00000078735	Il11ra2	0
ENSMUSG00000078746	Spata31f1d	0
ENSMUSG00000078762	Haus5	0
ENSMUSG00000078796	Zfp541	0
ENSMUSG00000078853	Igtp	0
ENSMUSG00000078878	Gm14305	0
ENSMUSG00000078889	Gm14288	0
ENSMUSG00000078945	Naip2	0
ENSMUSG00000078954	Arhgap8	0
ENSMUSG00000079022	Col22a1	0
ENSMUSG00000079293	Clec7a	0
ENSMUSG00000079396	Gm3411	0
ENSMUSG00000079505	Gm11131	0
ENSMUSG00000079557	Marchf2	0
ENSMUSG00000079592	C1qtnf5	0
ENSMUSG00000080774	Gm9143	0
ENSMUSG00000083012	Fam220a	0
ENSMUSG00000083100	Gm6044	0
ENSMUSG00000083674	Zfp133-ps	0
ENSMUSG00000083773	Gm13394	0
ENSMUSG00000083863	Gm13341	0
ENSMUSG00000084350	Znf41-ps	0
ENSMUSG00000084822	Myadml2os	0
ENSMUSG00000084904	Gm14827	0
ENSMUSG00000084917	Gm17477	0
ENSMUSG00000085069	Prdm16os	0
ENSMUSG00000085133	B930095G15Rik	0
ENSMUSG00000085192	Gm12195	0
ENSMUSG00000085316	D330050G23Rik	0
ENSMUSG00000085379	2310058D17Rik	0
ENSMUSG00000085419	Gm11734	0
ENSMUSG00000085553	Gm14808	0
ENSMUSG00000085669	Gm14817	0
ENSMUSG00000085732	Gm4279	0
ENSMUSG00000085776	5430402O13Rik	0
ENSMUSG00000085795	Zfp703	0
ENSMUSG00000085918	Gm13032	0
ENSMUSG00000086390	1810019D21Rik	0
ENSMUSG00000086542	Gm13782	0
ENSMUSG00000086714	0610009E02Rik	0
ENSMUSG00000086877	A230072C01Rik	0
ENSMUSG00000087107	Slfnlnc	0
ENSMUSG00000087143	A830082K12Rik	0
ENSMUSG00000087222	E030042O20Rik	0
ENSMUSG00000087231	E230016M11Rik	0
ENSMUSG00000087461	C230014O12Rik	0
ENSMUSG00000087516	Tbx3os1	0
ENSMUSG00000087691	Cd55os	0
ENSMUSG00000089663	Gm15651	0
ENSMUSG00000089706	B230216N24Rik	0
ENSMUSG00000089735	Gm8428	0
ENSMUSG00000089774	Slc5a3	0
ENSMUSG00000089837	Npcd	0
ENSMUSG00000089940	Gm4117	0
ENSMUSG00000090061	Nwd2	0
ENSMUSG00000090122	Kcne5	0
ENSMUSG00000090157	Gm16534	0
ENSMUSG00000090357	Gm17077	0
ENSMUSG00000090439	Gm17455	0
ENSMUSG00000090891	D6Ertd527e	0
ENSMUSG00000091105	Mrto4-ps2	0
ENSMUSG00000091363	Gm7701	0
ENSMUSG00000091423	Gm17509	0
ENSMUSG00000091764	Zfp964	0
ENSMUSG00000092060	Bend4	0
ENSMUSG00000092094	Zfp804b	0
ENSMUSG00000092167	Gm3696	0
ENSMUSG00000092258	Gm20444	0
ENSMUSG00000092300	Cdk3	0
ENSMUSG00000092323	NA	0
ENSMUSG00000092325	Gm18284	0
ENSMUSG00000093553	Gm20633	0
ENSMUSG00000093587	Gm20554	0
ENSMUSG00000093593	Gm20683	0
ENSMUSG00000093682	Gm20681	0
ENSMUSG00000093954	Gm16867	0
ENSMUSG00000093996	Spata31f1c	0
ENSMUSG00000094989	Rpl9-ps4	0
ENSMUSG00000096054	Syne1	0
ENSMUSG00000096256	4933409K07Rik	0
ENSMUSG00000096257	Ccer2	0
ENSMUSG00000096370	Gm21992	0
ENSMUSG00000096904	Lamtor3l	0
ENSMUSG00000097040	2610316D01Rik	0
ENSMUSG00000097047	1110020A21Rik	0
ENSMUSG00000097174	Gm4890	0
ENSMUSG00000097207	6030443J06Rik	0
ENSMUSG00000097216	4932441J04Rik	0
ENSMUSG00000097271	Gm9903	0
ENSMUSG00000097292	A230107N01Rik	0
ENSMUSG00000097336	Fendrr	0
ENSMUSG00000097350	4732491K20Rik	0
ENSMUSG00000097388	Gm3200	0
ENSMUSG00000097393	D030068K23Rik	0
ENSMUSG00000097559	D430018E03Rik	0
ENSMUSG00000097602	4930519P11Rik	0
ENSMUSG00000097654	Gm26714	0
ENSMUSG00000097697	4833412C05Rik	0
ENSMUSG00000097709	2810429I04Rik	0
ENSMUSG00000097756	A730056A06Rik	0
ENSMUSG00000097784	A430105J06Rik	0
ENSMUSG00000097787	Sgms1os1	0
ENSMUSG00000097805	Gm17473	0
ENSMUSG00000097854	NA	0
ENSMUSG00000097921	Gm26576	0
ENSMUSG00000097925	Gm26574	0
ENSMUSG00000097929	Tunar	0
ENSMUSG00000098155	Gm27022	0
ENSMUSG00000098158	Gm4804	0
ENSMUSG00000098492	Gm19353	0
ENSMUSG00000098650	Commd1b	0
ENSMUSG00000099354	1700124L16Rik	0
ENSMUSG00000100254	Trpc2	0
ENSMUSG00000100303	2600014E21Rik	0
ENSMUSG00000100345	Gm29418	0
ENSMUSG00000100396	Gm29367	0
ENSMUSG00000100510	Hand2os1	0
ENSMUSG00000100706	Gm19744	0
ENSMUSG00000101365	Gm19325	0
ENSMUSG00000102009	4933400F21Rik	0
ENSMUSG00000102140	Gm38058	0
ENSMUSG00000102142	NA	0
ENSMUSG00000102302	Gm38190	0
ENSMUSG00000102331	Gm19938	0
ENSMUSG00000102359	Gm38351	0
ENSMUSG00000102383	Gm38142	0
ENSMUSG00000102481	Gm37925	0
ENSMUSG00000102483	Catspere1	0
ENSMUSG00000102498	Gm19445	0
ENSMUSG00000102555	6430511E19Rik	0
ENSMUSG00000102559	Gm37570	0
ENSMUSG00000102579	Gm37965	0
ENSMUSG00000102642	A130048G24Rik	0
ENSMUSG00000102692	Dchs2	0
ENSMUSG00000102698	Gm37777	0
ENSMUSG00000102742	Pcdhga11	0
ENSMUSG00000102786	Gm38252	0
ENSMUSG00000102854	C130023A14Rik	0
ENSMUSG00000103138	NA	0
ENSMUSG00000103160	C130012C08Rik	0
ENSMUSG00000103443	Gm37132	0
ENSMUSG00000103522	9430087J23Rik	0
ENSMUSG00000103642	Gm37769	0
ENSMUSG00000103672	Gm37621	0
ENSMUSG00000103680	Gm37072	0
ENSMUSG00000103693	Gm37529	0
ENSMUSG00000103734	Gm37651	0
ENSMUSG00000103746	1700001G17Rik	0
ENSMUSG00000103770	Pcdha9	0
ENSMUSG00000103805	Gm37063	0
ENSMUSG00000103889	Gm37011	0
ENSMUSG00000103928	Gm37893	0
ENSMUSG00000103992	Gm38029	0
ENSMUSG00000104027	Gm37211	0
ENSMUSG00000104100	Gm37880	0
ENSMUSG00000104114	Gm37297	0
ENSMUSG00000104138	Gm36949	0
ENSMUSG00000104140	Gm37140	0
ENSMUSG00000104257	Gm20172	0
ENSMUSG00000104279	Gm38300	0
ENSMUSG00000104344	Gm38077	0
ENSMUSG00000104467	Gm37660	0
ENSMUSG00000104476	Gm38211	0
ENSMUSG00000104486	Gm38066	0
ENSMUSG00000104515	Gm37163	0
ENSMUSG00000104547	Gm43022	0
ENSMUSG00000104571	Gm43010	0
ENSMUSG00000104621	Gm43185	0
ENSMUSG00000104634	Gm42461	0
ENSMUSG00000104671	Gm43062	0
ENSMUSG00000104713	Gbp6	0
ENSMUSG00000104735	C130075A20Rik	0
ENSMUSG00000104876	Trdc	0
ENSMUSG00000104965	Gm43437	0
ENSMUSG00000105063	Gm43488	0
ENSMUSG00000105086	Gm42534	0
ENSMUSG00000105139	Gm19391	0
ENSMUSG00000105289	Gm43483	0
ENSMUSG00000105368	Gm43759	0
ENSMUSG00000105374	Gm42551	0
ENSMUSG00000105378	Gm42515	0
ENSMUSG00000105471	NA	0
ENSMUSG00000105637	Gm42480	0
ENSMUSG00000105745	Gm42521	0
ENSMUSG00000105748	Gm43088	0
ENSMUSG00000105801	C430019N01Rik	0
ENSMUSG00000105846	Gm43258	0
ENSMUSG00000105861	Gm43508	0
ENSMUSG00000105877	Gm42479	0
ENSMUSG00000105950	Gm43679	0
ENSMUSG00000105957	Gm43254	0
ENSMUSG00000106047	Gm42942	0
ENSMUSG00000106062	Gm43820	0
ENSMUSG00000106073	Gm42892	0
ENSMUSG00000106135	Gm6543	0
ENSMUSG00000106214	Gm43426	0
ENSMUSG00000106247	Gm43720	0
ENSMUSG00000106475	Gm43011	0
ENSMUSG00000106490	Gm43283	0
ENSMUSG00000106536	Gm42508	0
ENSMUSG00000106579	Gm42771	0
ENSMUSG00000106648	Gm43176	0
ENSMUSG00000106757	Gm43482	0
ENSMUSG00000106826	Gm42583	0
ENSMUSG00000106962	Gm43633	0
ENSMUSG00000107023	Gm42715	0
ENSMUSG00000107054	C730045M19Rik	0
ENSMUSG00000107192	Gm19583	0
ENSMUSG00000107286	Gm43788	0
ENSMUSG00000107317	Gm19719	0
ENSMUSG00000107402	4732416N19Rik	0
ENSMUSG00000107461	Gm44045	0
ENSMUSG00000107567	4930480K02Rik	0
ENSMUSG00000107905	Gm44230	0
ENSMUSG00000107917	Gm44235	0
ENSMUSG00000108053	Gm43890	0
ENSMUSG00000108092	Gm44189	0
ENSMUSG00000108132	Gm44175	0
ENSMUSG00000108170	Gm43966	0
ENSMUSG00000108242	9330118I20Rik	0
ENSMUSG00000108291	Gm44292	0
ENSMUSG00000108372	Gm45124	0
ENSMUSG00000108472	Gm45212	0
ENSMUSG00000108780	5430434F05Rik	0
ENSMUSG00000108880	Gm44560	0
ENSMUSG00000108912	E230020D15Rik	0
ENSMUSG00000109005	Gm45221	0
ENSMUSG00000109217	Gm44676	0
ENSMUSG00000109231	Gm45737	0
ENSMUSG00000109529	Gm44801	0
ENSMUSG00000109648	Svet1	0
ENSMUSG00000109697	Gm34030	0
ENSMUSG00000109874	Gm9911	0
ENSMUSG00000110079	Gm45292	0
ENSMUSG00000110120	Gm45251	0
ENSMUSG00000110138	4831440D22Rik	0
ENSMUSG00000110499	Gm45873	0
ENSMUSG00000110504	Gm45797	0
ENSMUSG00000110523	C230057M02Rik	0
ENSMUSG00000110529	Gm45694	0
ENSMUSG00000110540	Gm45743	0
ENSMUSG00000111080	Gm20300	0
ENSMUSG00000111324	Gm31410	0
ENSMUSG00000111854	Gm48740	0
ENSMUSG00000112132	Gm36229	0
ENSMUSG00000112153	Gm47591	0
ENSMUSG00000112307	Gm48751	0
ENSMUSG00000112838	Gm47098	0
ENSMUSG00000113065	Gm48870	0
ENSMUSG00000113752	Gm47817	0
ENSMUSG00000113842	Gm48138	0
ENSMUSG00000114016	Gm47258	0
ENSMUSG00000114094	Gm48375	0
ENSMUSG00000114161	Gm48662	0
ENSMUSG00000114264	Gm48095	0
ENSMUSG00000114282	5330431K02Rik	0
ENSMUSG00000114436	Gm48283	0
ENSMUSG00000114638	Gm31834	0
ENSMUSG00000114860	Gm49291	0
ENSMUSG00000114953	4930519K11Rik	0
ENSMUSG00000115100	Gm34934	0
ENSMUSG00000115108	Gm49228	0
ENSMUSG00000115161	Gm20555	0
ENSMUSG00000115186	Gm49417	0
ENSMUSG00000115190	NA	0
ENSMUSG00000115302	Gm49394	0
ENSMUSG00000115543	B230362B09Rik	0
ENSMUSG00000115555	Gm49307	0
ENSMUSG00000115902		0
ENSMUSG00000116069	Gm49510	0
ENSMUSG00000116226	Gm49502	0
ENSMUSG00000116305	Lncppara	0
ENSMUSG00000116518	Gm49494	0
ENSMUSG00000116617	Gm49767	0
ENSMUSG00000116657	Gm49774	0
ENSMUSG00000116716	Gm49643	0
ENSMUSG00000116796	Gm49784	0
ENSMUSG00000116881	Gm49674	0
ENSMUSG00000116903	Gm19522	0
ENSMUSG00000117042	2700054A10Rik	0
ENSMUSG00000117251	Gm49891	0
ENSMUSG00000117384	C330024C12Rik	0
ENSMUSG00000117422	CJ186046Rik	0
ENSMUSG00000117439	Gm50083	0
ENSMUSG00000117597	Gm50078	0
ENSMUSG00000117608	Gm53018	0
ENSMUSG00000117674	Gm31087	0
ENSMUSG00000117682	Gm18379	0
ENSMUSG00000117880	Gm34517	0
ENSMUSG00000118060	4933401L05Rik	0
ENSMUSG00000118661	Muc6	0
ENSMUSG00000119956	Gm57370	0
ENSMUSG00000120059	Gm46732	0
ENSMUSG00000120084	Gm57127	0
ENSMUSG00000120113	Fam120aos	0
ENSMUSG00000120169	9130004C02Rik	0
ENSMUSG00000120277	Gm2885	0
ENSMUSG00000120400	Gm3134	0
ENSMUSG00000120401	Gm56705	0
ENSMUSG00000120523	Gm57372	0
ENSMUSG00000120615	Gm56802	0
ENSMUSG00000120732	Gm56936	0
ENSMUSG00000120830	Gm56801	0
ENSMUSG00000120997	Gm57385	0
ENSMUSG00000121004	Gm57302	0
ENSMUSG00000121007	Gm57303	0
ENSMUSG00000121068	Gm57050	0
ENSMUSG00000121086	Gm6403	0
ENSMUSG00000121241	Gm57475	0
ENSMUSG00002074901	Gm54819	0
ENSMUSG00002075463	Gm56190	0
ENSMUSG00002076664	Gm55891	0
ENSMUSG00000000031	H19	1
ENSMUSG00000000088	Cox5a	1
ENSMUSG00000000295	Hddc2	1
ENSMUSG00000000296	Tpd52l1	1
ENSMUSG00000000486	Septin1	1
ENSMUSG00000000532	Acvr1b	1
ENSMUSG00000000581	C1d	1
ENSMUSG00000000740	Rpl13	1
ENSMUSG00000000869	Il4	1
ENSMUSG00000001029	Icam2	1
ENSMUSG00000001056	Nhp2	1
ENSMUSG00000001105	Ift20	1
ENSMUSG00000001134	Uxt	1
ENSMUSG00000001158	Snrnp27	1
ENSMUSG00000001175	Calm1	1
ENSMUSG00000001289	Pfdn5	1
ENSMUSG00000001521	Tulp3	1
ENSMUSG00000001604	Tcea3	1
ENSMUSG00000001666	Ddt	1
ENSMUSG00000001794	Capns1	1
ENSMUSG00000001815	Evx2	1
ENSMUSG00000001942	Siae	1
ENSMUSG00000001948	Spa17	1
ENSMUSG00000002014	Ssr4	1
ENSMUSG00000002015	Bcap31	1
ENSMUSG00000002043	Trappc6a	1
ENSMUSG00000002064	Sdf2	1
ENSMUSG00000002233	Rhoc	1
ENSMUSG00000002250	Ppard	1
ENSMUSG00000002308	Cd320	1
ENSMUSG00000002345	Borcs8	1
ENSMUSG00000002379	Ndufa11	1
ENSMUSG00000002395	Use1	1
ENSMUSG00000002416	Ndufb2	1
ENSMUSG00000002477	Snrpd1	1
ENSMUSG00000002580	Mien1	1
ENSMUSG00000002661	Alkbh7	1
ENSMUSG00000002732	Fkbp7	1
ENSMUSG00000002768	Mea1	1
ENSMUSG00000002804	Nudt14	1
ENSMUSG00000003032	Klf4	1
ENSMUSG00000003038	Hmgn2	1
ENSMUSG00000003068	Stk11	1
ENSMUSG00000003072	Atp5f1d	1
ENSMUSG00000003190	Bcl2l12	1
ENSMUSG00000003355	Fkbp11	1
ENSMUSG00000003378	Grik5	1
ENSMUSG00000003380	Rabac1	1
ENSMUSG00000003423	Pih1d1	1
ENSMUSG00000003429	Rps11	1
ENSMUSG00000003444	Med29	1
ENSMUSG00000003518	Dusp3	1
ENSMUSG00000003549	Ercc1	1
ENSMUSG00000003824	Syce2	1
ENSMUSG00000003955	Fam162a	1
ENSMUSG00000003970	Rpl8	1
ENSMUSG00000004032	Gstm5	1
ENSMUSG00000004096	Cwc15	1
ENSMUSG00000004268	Emg1	1
ENSMUSG00000004285	Atp6v1f	1
ENSMUSG00000004317	Clcn5	1
ENSMUSG00000004610	Etfb	1
ENSMUSG00000004667	Polr2e	1
ENSMUSG00000004945	Tmem242	1
ENSMUSG00000005054	Cstb	1
ENSMUSG00000005161	Prdx2	1
ENSMUSG00000005447	Pafah1b3	1
ENSMUSG00000005510	Ndufs3	1
ENSMUSG00000005533	Igf1r	1
ENSMUSG00000005580	Adcy9	1
ENSMUSG00000005732	Ranbp1	1
ENSMUSG00000005779	Psmb4	1
ENSMUSG00000006014	Prg4	1
ENSMUSG00000006050	Sra1	1
ENSMUSG00000006057	Atp5mc1	1
ENSMUSG00000006095	Tbcb	1
ENSMUSG00000006333	Rps9	1
ENSMUSG00000006335	Tfpt	1
ENSMUSG00000006360	Crip1	1
ENSMUSG00000006519	Cyba	1
ENSMUSG00000006589	Aprt	1
ENSMUSG00000006717	Acot13	1
ENSMUSG00000006732	Mettl1	1
ENSMUSG00000006941	Eif1b	1
ENSMUSG00000007039	Ddah2	1
ENSMUSG00000007041	Clic1	1
ENSMUSG00000007050	Lsm2	1
ENSMUSG00000007721	Ccdc124	1
ENSMUSG00000007777	Trappc2b	1
ENSMUSG00000007836	Hnrnpa0	1
ENSMUSG00000007867	Ift43	1
ENSMUSG00000007892	Rplp1	1
ENSMUSG00000008036	Ap2s1	1
ENSMUSG00000008333	Snrpb2	1
ENSMUSG00000008668	Rps18	1
ENSMUSG00000008682	Rpl10	1
ENSMUSG00000008683	Rps15a	1
ENSMUSG00000008822	Acyp1	1
ENSMUSG00000009013	Dynll1	1
ENSMUSG00000009075	Cabp7	1
ENSMUSG00000009076	Zmat5	1
ENSMUSG00000009549	Srp14	1
ENSMUSG00000009687	Fxyd5	1
ENSMUSG00000009927	Rps25	1
ENSMUSG00000010362	Rdm1	1
ENSMUSG00000010376	Nedd8	1
ENSMUSG00000010406	Mrpl52	1
ENSMUSG00000010607	Pigyl	1
ENSMUSG00000010911	Apip	1
ENSMUSG00000011257	Pabpc4	1
ENSMUSG00000011382	Dhdh	1
ENSMUSG00000012126	Ubxn11	1
ENSMUSG00000012405	Rpl15	1
ENSMUSG00000012483	Rpa3	1
ENSMUSG00000012777	Acp4	1
ENSMUSG00000012848	Rps5	1
ENSMUSG00000013622	Atraid	1
ENSMUSG00000013822	Elof1	1
ENSMUSG00000013846	St3gal1	1
ENSMUSG00000014075	Dynlt2b	1
ENSMUSG00000014294	Ndufa2	1
ENSMUSG00000014301	Pam16	1
ENSMUSG00000014313	Cox6c	1
ENSMUSG00000014504	Srp19	1
ENSMUSG00000014633	Cmc2	1
ENSMUSG00000014769	Psmb1	1
ENSMUSG00000014778	Fhod1	1
ENSMUSG00000014856	Tmem208	1
ENSMUSG00000015013	Trappc2l	1
ENSMUSG00000015092	Edf1	1
ENSMUSG00000015289	Lage3	1
ENSMUSG00000015305	Sash1	1
ENSMUSG00000015337	Endog	1
ENSMUSG00000015542	Nat9	1
ENSMUSG00000015575	Atp6v0e	1
ENSMUSG00000015671	Psma2	1
ENSMUSG00000015672	Mrpl32	1
ENSMUSG00000015790	Surf1	1
ENSMUSG00000015804	Med28	1
ENSMUSG00000015943	Bola1	1
ENSMUSG00000016252	Atp5f1e	1
ENSMUSG00000016344	Ppdpf	1
ENSMUSG00000016427	Ndufa1	1
ENSMUSG00000016495	Plgrkt	1
ENSMUSG00000016637	Ift27	1
ENSMUSG00000016758	Bik	1
ENSMUSG00000016833	Mrps18c	1
ENSMUSG00000017188	Coa3	1
ENSMUSG00000017307	Acot8	1
ENSMUSG00000017404	Rpl19	1
ENSMUSG00000017412	Cacnb4	1
ENSMUSG00000017723	Wfdc2	1
ENSMUSG00000017778	Cox7c	1
ENSMUSG00000018102	H2bc4	1
ENSMUSG00000018286	Psmb6	1
ENSMUSG00000018293	Pfn1	1
ENSMUSG00000018451	6330403K07Rik	1
ENSMUSG00000018476	Kdm6b	1
ENSMUSG00000018559	Ctdnep1	1
ENSMUSG00000018567	Gabarap	1
ENSMUSG00000018569	Cldn7	1
ENSMUSG00000018585	Atox1	1
ENSMUSG00000018666	Cbx1	1
ENSMUSG00000018672	Copz2	1
ENSMUSG00000018740	Slc25a35	1
ENSMUSG00000018750	Zbtb4	1
ENSMUSG00000018752	Tnfsfm13	1
ENSMUSG00000018770	Atp5mc3	1
ENSMUSG00000018821	Avpi1	1
ENSMUSG00000018858	Mrpl58	1
ENSMUSG00000018923	Med11	1
ENSMUSG00000019054	Fis1	1
ENSMUSG00000019132	BC005537	1
ENSMUSG00000019158	Tmem160	1
ENSMUSG00000019173	Rab5c	1
ENSMUSG00000019362	D8Ertd738e	1
ENSMUSG00000019370	Calm3	1
ENSMUSG00000019437	Tlcd1	1
ENSMUSG00000019579	Mydgf	1
ENSMUSG00000019659	Ccdc12	1
ENSMUSG00000019689	Fmc1	1
ENSMUSG00000019710	Mrpl24	1
ENSMUSG00000019738	Polr2i	1
ENSMUSG00000019782	Rwdd1	1
ENSMUSG00000019791	Hint3	1
ENSMUSG00000019797	Mtres1	1
ENSMUSG00000019808	Adat2	1
ENSMUSG00000019878	Hsf2	1
ENSMUSG00000019897	Ccdc59	1
ENSMUSG00000020018	Snrpf	1
ENSMUSG00000020022	Ndufa12	1
ENSMUSG00000020032	Nuak1	1
ENSMUSG00000020056	Washc3	1
ENSMUSG00000020077	Srgn	1
ENSMUSG00000020098	Pcbd1	1
ENSMUSG00000020107	Anapc16	1
ENSMUSG00000020153	Ndufs7	1
ENSMUSG00000020163	Uqcr11	1
ENSMUSG00000020164	Kcnmb4os1	1
ENSMUSG00000020180	Snrpd3	1
ENSMUSG00000020219	Timm13	1
ENSMUSG00000020224	Llph	1
ENSMUSG00000020225	Tmbim4	1
ENSMUSG00000020232	Hmg20b	1
ENSMUSG00000020261	Slc36a1	1
ENSMUSG00000020267	Hint1	1
ENSMUSG00000020307	Cdc34	1
ENSMUSG00000020308	Tpgs1	1
ENSMUSG00000020323	Prss57	1
ENSMUSG00000020372	Rack1	1
ENSMUSG00000020386	Sar1b	1
ENSMUSG00000020407	Upp1	1
ENSMUSG00000020415	Pttg1	1
ENSMUSG00000020440	Arf5	1
ENSMUSG00000020441	2310033P09Rik	1
ENSMUSG00000020460	Rps27a	1
ENSMUSG00000020462	Cfap36	1
ENSMUSG00000020477	Mrps24	1
ENSMUSG00000020485	Supt4a	1
ENSMUSG00000020514	Mrpl22	1
ENSMUSG00000020519	Sap30l	1
ENSMUSG00000020644	Id2	1
ENSMUSG00000020648	Dus4l	1
ENSMUSG00000020660	Pomc	1
ENSMUSG00000020736	Nt5c	1
ENSMUSG00000020801	Med31	1
ENSMUSG00000020803	Txndc17	1
ENSMUSG00000020812	Snhg16	1
ENSMUSG00000020821	Kif1c	1
ENSMUSG00000020831	0610010K14Rik	1
ENSMUSG00000020857	Nme2	1
ENSMUSG00000020863	Luc7l3	1
ENSMUSG00000020886	Dlg4	1
ENSMUSG00000020893	Per1	1
ENSMUSG00000020895	Tmem107	1
ENSMUSG00000020903	Stx8	1
ENSMUSG00000020949	Fkbp3	1
ENSMUSG00000020955	Ap4s1	1
ENSMUSG00000020990	Cdkl1	1
ENSMUSG00000021018	Polr2h	1
ENSMUSG00000021025	Nfkbia	1
ENSMUSG00000021040	Slirp	1
ENSMUSG00000021079	Timm9	1
ENSMUSG00000021086	Ccdc175	1
ENSMUSG00000021103	Mnat1	1
ENSMUSG00000021131	Erh	1
ENSMUSG00000021139	S2bpcox16	1
ENSMUSG00000021243	Fcf1	1
ENSMUSG00000021258	Ccnk	1
ENSMUSG00000021263	Degs2	1
ENSMUSG00000021290	Atp5mj	1
ENSMUSG00000021366	Hivep1	1
ENSMUSG00000021420	Fars2	1
ENSMUSG00000021496	Pcbd2	1
ENSMUSG00000021520	Uqcrb	1
ENSMUSG00000021552	Gkap1	1
ENSMUSG00000021591	Glrx	1
ENSMUSG00000021606	Ndufs6	1
ENSMUSG00000021607	Mrpl36	1
ENSMUSG00000021643	Serf1	1
ENSMUSG00000021660	Btf3	1
ENSMUSG00000021714	Cenpk	1
ENSMUSG00000021716	Srek1ip1	1
ENSMUSG00000021760	Gpx8	1
ENSMUSG00000021764	Ndufs4	1
ENSMUSG00000021772	Nkiras1	1
ENSMUSG00000021773	Comtd1	1
ENSMUSG00000021807	Rtraf	1
ENSMUSG00000021820	Camk2g	1
ENSMUSG00000021917	Spcs1	1
ENSMUSG00000021928	Ebpl	1
ENSMUSG00000021951	Eef1akmt1	1
ENSMUSG00000021958	Pinx1	1
ENSMUSG00000021963	Sap18	1
ENSMUSG00000021967	Mrpl57	1
ENSMUSG00000021996	Esd	1
ENSMUSG00000022013	Dnajc15	1
ENSMUSG00000022039	Adam2	1
ENSMUSG00000022129	Dct	1
ENSMUSG00000022174	Dad1	1
ENSMUSG00000022193	Psmb5	1
ENSMUSG00000022205	Sub1	1
ENSMUSG00000022216	Psme1	1
ENSMUSG00000022225	Cma1	1
ENSMUSG00000022283	Pabpc1	1
ENSMUSG00000022312	Eif3h	1
ENSMUSG00000022323	Rida	1
ENSMUSG00000022354	Ndufb9	1
ENSMUSG00000022370	Mrpl13	1
ENSMUSG00000022400	Rbx1	1
ENSMUSG00000022427	Tomm22	1
ENSMUSG00000022450	Ndufa6	1
ENSMUSG00000022452	Smdt1	1
ENSMUSG00000022474	Pmm1	1
ENSMUSG00000022528	Hes1	1
ENSMUSG00000022548	Apod	1
ENSMUSG00000022554	Hgh1	1
ENSMUSG00000022577	Ly6h	1
ENSMUSG00000022635	Zcrb1	1
ENSMUSG00000022636	Alcam	1
ENSMUSG00000022671	Mzt2	1
ENSMUSG00000022701	Ccdc191	1
ENSMUSG00000022722	Arl6	1
ENSMUSG00000022748	Cmss1	1
ENSMUSG00000022760	Thap7	1
ENSMUSG00000022820	Ndufb4	1
ENSMUSG00000022890	Atp5pf	1
ENSMUSG00000022940	Pigp	1
ENSMUSG00000022956	Atp5po	1
ENSMUSG00000022961	Son	1
ENSMUSG00000022972	Cfap298	1
ENSMUSG00000022982	Sod1	1
ENSMUSG00000023020	Cox14	1
ENSMUSG00000023036	Pcdhgc4	1
ENSMUSG00000023089	Ndufa5	1
ENSMUSG00000023175	Bsg	1
ENSMUSG00000023367	Tmem176a	1
ENSMUSG00000023791	Pigx	1
ENSMUSG00000023861	Mpc1	1
ENSMUSG00000023904	Hcfc1r1	1
ENSMUSG00000023911	Flywch2	1
ENSMUSG00000023939	Mrpl14	1
ENSMUSG00000023966	Rsph9	1
ENSMUSG00000024008	Cpne5	1
ENSMUSG00000024014	Pim1	1
ENSMUSG00000024036	Slc37a1	1
ENSMUSG00000024038	Ndufv3	1
ENSMUSG00000024048	Myl12a	1
ENSMUSG00000024067	Dpy30	1
ENSMUSG00000024099	Ndufv2	1
ENSMUSG00000024132	Eci1	1
ENSMUSG00000024158	Hagh	1
ENSMUSG00000024177	Nme4	1
ENSMUSG00000024181	Mrpl28	1
ENSMUSG00000024194	Cuta	1
ENSMUSG00000024205	Rpl36-ps2	1
ENSMUSG00000024208	Uqcc2	1
ENSMUSG00000024217	Snrpc	1
ENSMUSG00000024248	Cox7a2l	1
ENSMUSG00000024258	Polr2d	1
ENSMUSG00000024268	Celf4	1
ENSMUSG00000024309	Pfdn6	1
ENSMUSG00000024346	Pfdn1	1
ENSMUSG00000024352	Spata24	1
ENSMUSG00000024397	Aif1	1
ENSMUSG00000024414	Mrpl27	1
ENSMUSG00000024446	Rpp21	1
ENSMUSG00000024472	Dcp2	1
ENSMUSG00000024516	Sec11c	1
ENSMUSG00000024517	Grp	1
ENSMUSG00000024526	Cidea	1
ENSMUSG00000024538	Ppic	1
ENSMUSG00000024570	Rbfa	1
ENSMUSG00000024608	Rps14	1
ENSMUSG00000024610	Cd74	1
ENSMUSG00000024646	Cyb5a	1
ENSMUSG00000024759	Atl3	1
ENSMUSG00000024790	Sac3d1	1
ENSMUSG00000024829	Mrpl21	1
ENSMUSG00000024844	Banf1	1
ENSMUSG00000024845	Tmem134	1
ENSMUSG00000024854	Pold4	1
ENSMUSG00000024866	Acy3	1
ENSMUSG00000024887	Asah2	1
ENSMUSG00000024902	Mrpl11	1
ENSMUSG00000024907	Gal	1
ENSMUSG00000024914	Drap1	1
ENSMUSG00000024925	Rnaseh2c	1
ENSMUSG00000024953	Prdx5	1
ENSMUSG00000024959	Bad	1
ENSMUSG00000025035	Arl3	1
ENSMUSG00000025102	3110040N11Rik	1
ENSMUSG00000025135	Anapc11	1
ENSMUSG00000025144	Cenpx	1
ENSMUSG00000025201	Bloc1s2-ps	1
ENSMUSG00000025204	Ndufb8	1
ENSMUSG00000025208	Mrpl43	1
ENSMUSG00000025260	Hsd17b10	1
ENSMUSG00000025289	Prdx4	1
ENSMUSG00000025290	Rps24	1
ENSMUSG00000025351	Cd63	1
ENSMUSG00000025353	Ormdl2	1
ENSMUSG00000025362	Rps26	1
ENSMUSG00000025381	Cnpy2	1
ENSMUSG00000025408	Ddit3	1
ENSMUSG00000025436	Atp23	1
ENSMUSG00000025466	Fuom	1
ENSMUSG00000025484	Bet1l	1
ENSMUSG00000025492	Ifitm3	1
ENSMUSG00000025508	Rplp2	1
ENSMUSG00000025510	Cd151	1
ENSMUSG00000025571	Tnrc6c	1
ENSMUSG00000025591	Tma16	1
ENSMUSG00000025723	Nmb	1
ENSMUSG00000025724	Sec11a	1
ENSMUSG00000025731	Mettl26	1
ENSMUSG00000025739	Gng13	1
ENSMUSG00000025766	D3Ertd751e	1
ENSMUSG00000025794	Rpl14	1
ENSMUSG00000025813	Homer2	1
ENSMUSG00000025825	Iscu	1
ENSMUSG00000025868	Higd2a	1
ENSMUSG00000025967	Eef1b2	1
ENSMUSG00000025997	Ikzf2	1
ENSMUSG00000026032	Ndufb3	1
ENSMUSG00000026078	Pdcl3	1
ENSMUSG00000026083	Eif5b	1
ENSMUSG00000026087	Mrpl30	1
ENSMUSG00000026104	Stat1	1
ENSMUSG00000026126	Ptpn18	1
ENSMUSG00000026154	Sdhaf4	1
ENSMUSG00000026158	Ogfrl1	1
ENSMUSG00000026162	Nhej1	1
ENSMUSG00000026176	Ctdsp1	1
ENSMUSG00000026238	Ptma	1
ENSMUSG00000026239	Pde6d	1
ENSMUSG00000026385	Dbi	1
ENSMUSG00000026388	3110009E18Rik	1
ENSMUSG00000026429	Ube2t	1
ENSMUSG00000026463	Atp2b4	1
ENSMUSG00000026500	Cox20	1
ENSMUSG00000026511	Srp9	1
ENSMUSG00000026568	Mpc2	1
ENSMUSG00000026632	Tatdn3	1
ENSMUSG00000026688	Mgst3	1
ENSMUSG00000026839	Upp2	1
ENSMUSG00000026895	Ndufa8	1
ENSMUSG00000026939	Tmem141	1
ENSMUSG00000026966	Ssna1	1
ENSMUSG00000026969	Cimip2a	1
ENSMUSG00000027086	Fastkd1	1
ENSMUSG00000027133	Nop10	1
ENSMUSG00000027160	Ccdc34	1
ENSMUSG00000027165	Iftap	1
ENSMUSG00000027166	Dnajc24	1
ENSMUSG00000027239	Mdk	1
ENSMUSG00000027245	Hypk	1
ENSMUSG00000027304	Rtf1	1
ENSMUSG00000027316	Gfra4	1
ENSMUSG00000027329	Spef1	1
ENSMUSG00000027349	Fam98b	1
ENSMUSG00000027364	Usp50	1
ENSMUSG00000027384	Ndufaf5	1
ENSMUSG00000027447	Cst3	1
ENSMUSG00000027472	Pdrg1	1
ENSMUSG00000027533	Fabp5	1
ENSMUSG00000027566	Psma7	1
ENSMUSG00000027577	Chrna4	1
ENSMUSG00000027593	Raly	1
ENSMUSG00000027602	Map1lc3a	1
ENSMUSG00000027636	Sla2	1
ENSMUSG00000027663	Zmat3	1
ENSMUSG00000027673	Ndufb5	1
ENSMUSG00000027679	Dnajc19	1
ENSMUSG00000027706	Sec62	1
ENSMUSG00000027720	Il2	1
ENSMUSG00000027737	Slc7a11	1
ENSMUSG00000027864	Ptgfrn	1
ENSMUSG00000027907	S100a11	1
ENSMUSG00000027937	Jtb	1
ENSMUSG00000027944	Hax1	1
ENSMUSG00000027952	Pmvk	1
ENSMUSG00000027953	Slc50a1	1
ENSMUSG00000027961	Lrrc39	1
ENSMUSG00000028029	Aimp1	1
ENSMUSG00000028044	Cks1b	1
ENSMUSG00000028062	Lamtor2	1
ENSMUSG00000028070	Naxe	1
ENSMUSG00000028081	Rps3a1	1
ENSMUSG00000028116	Myoz2	1
ENSMUSG00000028139	Riiad1	1
ENSMUSG00000028176	Lrrc7	1
ENSMUSG00000028177	1810013D15Rik	1
ENSMUSG00000028218	Cibar1	1
ENSMUSG00000028234	Rps20	1
ENSMUSG00000028266	Lmo4	1
ENSMUSG00000028295	Smim8	1
ENSMUSG00000028329	Xpa	1
ENSMUSG00000028367	Txn1	1
ENSMUSG00000028398	Dmac1	1
ENSMUSG00000028399	Ptprd	1
ENSMUSG00000028407	Smim27	1
ENSMUSG00000028443	Nudt2	1
ENSMUSG00000028445	Enho	1
ENSMUSG00000028447	Dctn3	1
ENSMUSG00000028461	Ccdc107	1
ENSMUSG00000028466	Creb3	1
ENSMUSG00000028470	Hint2	1
ENSMUSG00000028475	Spaar	1
ENSMUSG00000028478	Clta	1
ENSMUSG00000028495	Rps6	1
ENSMUSG00000028497	Hacd4	1
ENSMUSG00000028549	Itgb3bp	1
ENSMUSG00000028567	Txndc12	1
ENSMUSG00000028597	Gpx7	1
ENSMUSG00000028601	Echdc2	1
ENSMUSG00000028609	Magoh	1
ENSMUSG00000028643	Svbp	1
ENSMUSG00000028647	Mycbp	1
ENSMUSG00000028648	Ndufs5	1
ENSMUSG00000028729	Ebna1bp2	1
ENSMUSG00000028741	Mrto4	1
ENSMUSG00000028795	Ccdc28b	1
ENSMUSG00000028797	Tmem234	1
ENSMUSG00000028798	Eif3i	1
ENSMUSG00000028821	Syf2	1
ENSMUSG00000028822	Tmem50a	1
ENSMUSG00000028837	Psmb2	1
ENSMUSG00000028840	Zfp593	1
ENSMUSG00000028843	Sh3bgrl3	1
ENSMUSG00000028861	Mrps15	1
ENSMUSG00000028907	Utp11	1
ENSMUSG00000028936	Rpl22	1
ENSMUSG00000028964	Park7	1
ENSMUSG00000028998	Tomm7	1
ENSMUSG00000029048	Rer1	1
ENSMUSG00000029059	Prxl2b	1
ENSMUSG00000029066	Mrpl20	1
ENSMUSG00000029128	Rab28	1
ENSMUSG00000029136	Rbks	1
ENSMUSG00000029149	Krtcap3	1
ENSMUSG00000029165	Agbl5	1
ENSMUSG00000029311	Hsd17b11	1
ENSMUSG00000029373	Pf4	1
ENSMUSG00000029465	Arpc3	1
ENSMUSG00000029535	Triap1	1
ENSMUSG00000029546	Uncx	1
ENSMUSG00000029614	Rpl6	1
ENSMUSG00000029623	Pdap1	1
ENSMUSG00000029629	Phf14	1
ENSMUSG00000029632	Ndufa4	1
ENSMUSG00000029638	Glcci1	1
ENSMUSG00000029642	Polr1d	1
ENSMUSG00000029649	Pomp	1
ENSMUSG00000029673	Auts2	1
ENSMUSG00000029703	Lrwd1	1
ENSMUSG00000029715	Pop7	1
ENSMUSG00000029716	Tfr2	1
ENSMUSG00000029725	Ppp1r35	1
ENSMUSG00000029810	Tmem176b	1
ENSMUSG00000029815	Malsu1	1
ENSMUSG00000029817	Tra2a	1
ENSMUSG00000029823	Luc7l2	1
ENSMUSG00000029864	Gstk1	1
ENSMUSG00000029911	Ssbp1	1
ENSMUSG00000029918	Mrps33	1
ENSMUSG00000030034	Ino80b	1
ENSMUSG00000030037	Mrpl53	1
ENSMUSG00000030116	Mfap5	1
ENSMUSG00000030122	Ptms	1
ENSMUSG00000030126	Tmcc1	1
ENSMUSG00000030168	Adipor2	1
ENSMUSG00000030188	Magohb	1
ENSMUSG00000030259	Rassf8	1
ENSMUSG00000030329	Pianp	1
ENSMUSG00000030335	Mrpl51	1
ENSMUSG00000030417	Pdcd5	1
ENSMUSG00000030431	Tmem238	1
ENSMUSG00000030432	Rpl28	1
ENSMUSG00000030532	Hddc3	1
ENSMUSG00000030538	Cib1	1
ENSMUSG00000030587	2200002D01Rik	1
ENSMUSG00000030589	Rasgrp4	1
ENSMUSG00000030604	Zfp626	1
ENSMUSG00000030611	Mrps11	1
ENSMUSG00000030612	Mrpl46	1
ENSMUSG00000030615	Tmem126a	1
ENSMUSG00000030647	Ndufc2	1
ENSMUSG00000030672	Mylpf	1
ENSMUSG00000030680	Pagr1a	1
ENSMUSG00000030703	Gdpd3	1
ENSMUSG00000030744	Rps3	1
ENSMUSG00000030763	Lcmt1	1
ENSMUSG00000030793	Pycard	1
ENSMUSG00000030796	Tead2	1
ENSMUSG00000030844	Rgs10	1
ENSMUSG00000030846	Tial1	1
ENSMUSG00000030879	Mrpl17	1
ENSMUSG00000030887	Pdzd9	1
ENSMUSG00000031059	Ndufb11	1
ENSMUSG00000031072	LTO1	1
ENSMUSG00000031104	Rab33a	1
ENSMUSG00000031107	Rbmx2	1
ENSMUSG00000031145	Prickle3	1
ENSMUSG00000031158	Timm17b	1
ENSMUSG00000031168	Ebp	1
ENSMUSG00000031198	Fundc2	1
ENSMUSG00000031231	Cox7b	1
ENSMUSG00000031290	Lrch2	1
ENSMUSG00000031312	Itgb1bp2	1
ENSMUSG00000031320	Rps4x	1
ENSMUSG00000031458	Coprs	1
ENSMUSG00000031490	Eif4ebp1	1
ENSMUSG00000031533	Mrps31	1
ENSMUSG00000031536	Polb	1
ENSMUSG00000031543	Ank1	1
ENSMUSG00000031546	Gins4	1
ENSMUSG00000031590	Frg1	1
ENSMUSG00000031609	Sap30	1
ENSMUSG00000031732	Phlpp2	1
ENSMUSG00000031765	Mt1	1
ENSMUSG00000031807	Pgls	1
ENSMUSG00000031813	Mvb12a	1
ENSMUSG00000031818	Cox4i1	1
ENSMUSG00000031827	Cotl1	1
ENSMUSG00000031838	Ifi30	1
ENSMUSG00000031839	Hsbp1	1
ENSMUSG00000031848	Lsm4	1
ENSMUSG00000031879	Ciao2b	1
ENSMUSG00000031897	Psmb10	1
ENSMUSG00000031950	Gabarapl2	1
ENSMUSG00000032026	Rexo2	1
ENSMUSG00000032051	Fdx1	1
ENSMUSG00000032060	Cryab	1
ENSMUSG00000032083	Apoa1	1
ENSMUSG00000032121	Tmem218	1
ENSMUSG00000032239	Rp9	1
ENSMUSG00000032249	Anp32a	1
ENSMUSG00000032251	Irak1bp1	1
ENSMUSG00000032288	Imp3	1
ENSMUSG00000032299	Commd4	1
ENSMUSG00000032311	Nrg4	1
ENSMUSG00000032330	Cox7a2	1
ENSMUSG00000032346	Ooep	1
ENSMUSG00000032353	Tmed3	1
ENSMUSG00000032383	Ppib	1
ENSMUSG00000032398	Snapc5	1
ENSMUSG00000032403	2300009A05Rik	1
ENSMUSG00000032478	Nme6	1
ENSMUSG00000032518	Rpsa	1
ENSMUSG00000032526	Ss18l2	1
ENSMUSG00000032565	Nudt16	1
ENSMUSG00000032575	Manf	1
ENSMUSG00000032596	Uba7	1
ENSMUSG00000032607	Amt	1
ENSMUSG00000032673	Prorsd1	1
ENSMUSG00000032717	Mdfi	1
ENSMUSG00000032766	Gng11	1
ENSMUSG00000032892	Rangrf	1
ENSMUSG00000032940	Rbm11	1
ENSMUSG00000032946	Rasgrp2	1
ENSMUSG00000032959	Pebp1	1
ENSMUSG00000033020	Polr2f	1
ENSMUSG00000033029	1700088E04Rik	1
ENSMUSG00000033036	Ppihl	1
ENSMUSG00000033099	Nol12	1
ENSMUSG00000033161	Atp1a1	1
ENSMUSG00000033282	Rpgrip1l	1
ENSMUSG00000033307	Mif	1
ENSMUSG00000033318	Gstt2	1
ENSMUSG00000033379	Atp6v0b	1
ENSMUSG00000033429	Mcee	1
ENSMUSG00000033467	Crlf2	1
ENSMUSG00000033475	Tomm6	1
ENSMUSG00000033540	Idua	1
ENSMUSG00000033735	Spr	1
ENSMUSG00000033845	Mrpl15	1
ENSMUSG00000033916	Chmp2a	1
ENSMUSG00000033938	Ndufb7	1
ENSMUSG00000033940	Brk1	1
ENSMUSG00000034041	Lyl1	1
ENSMUSG00000034059	Ypel4	1
ENSMUSG00000034192	Lsm3	1
ENSMUSG00000034243	Golgb1	1
ENSMUSG00000034278	Dnajc17	1
ENSMUSG00000034345	Gtf2h5	1
ENSMUSG00000034429	Zfp707	1
ENSMUSG00000034566	Atp5pd	1
ENSMUSG00000034602	Mon2	1
ENSMUSG00000034673	Pbx2	1
ENSMUSG00000034765	Dusp5	1
ENSMUSG00000034799	Unc13a	1
ENSMUSG00000034868	Myl12b	1
ENSMUSG00000034880	Mrpl34	1
ENSMUSG00000034892	Rps29	1
ENSMUSG00000034926	Dhcr24	1
ENSMUSG00000034932	Mrpl54	1
ENSMUSG00000034993	Vat1	1
ENSMUSG00000035048	Anapc13	1
ENSMUSG00000035109	Shc4	1
ENSMUSG00000035165	Kcne3	1
ENSMUSG00000035215	Lsm7	1
ENSMUSG00000035237	Lcat	1
ENSMUSG00000035242	Oaz1	1
ENSMUSG00000035268	Pkig	1
ENSMUSG00000035278	Plekhj1	1
ENSMUSG00000035295	Wdr38	1
ENSMUSG00000035299	Mid1	1
ENSMUSG00000035352	Ccl12	1
ENSMUSG00000035443	Thyn1	1
ENSMUSG00000035458	Tnni3	1
ENSMUSG00000035521	Gnptg	1
ENSMUSG00000035595	Fam174c	1
ENSMUSG00000035640	Cbarp	1
ENSMUSG00000035642	Aamdc	1
ENSMUSG00000035674	Ndufa3	1
ENSMUSG00000035699	Slc51a	1
ENSMUSG00000035885	Cox8a	1
ENSMUSG00000036053	Fmnl2	1
ENSMUSG00000036111	Lmo1	1
ENSMUSG00000036114	Rpp25l	1
ENSMUSG00000036168	Ccdc38	1
ENSMUSG00000036181	H1f2	1
ENSMUSG00000036199	Ndufa13	1
ENSMUSG00000036299	BC031181	1
ENSMUSG00000036305	Rpl39-ps	1
ENSMUSG00000036315	Polr1h	1
ENSMUSG00000036372	Tmem258	1
ENSMUSG00000036398	Ppp1r11	1
ENSMUSG00000036478	Btg1	1
ENSMUSG00000036504	Phpt1	1
ENSMUSG00000036513	Commd2	1
ENSMUSG00000036560	Lgi4	1
ENSMUSG00000036570	Fxyd1	1
ENSMUSG00000036572	Upf3b	1
ENSMUSG00000036578	Fxyd7	1
ENSMUSG00000036632	Alg5	1
ENSMUSG00000036748	Cuedc2	1
ENSMUSG00000036751	Cox6b1	1
ENSMUSG00000036781	Rps27l	1
ENSMUSG00000036826	Igflr1	1
ENSMUSG00000036835	Psenen	1
ENSMUSG00000036850	Mrpl41	1
ENSMUSG00000036858	Ptcra	1
ENSMUSG00000036860	Mrpl55	1
ENSMUSG00000036934	4921524J17Rik	1
ENSMUSG00000036977	Anapc10	1
ENSMUSG00000036983	Tfb1m	1
ENSMUSG00000036992	Nxt1	1
ENSMUSG00000037060	Cavin3	1
ENSMUSG00000037110	Ralgapa2	1
ENSMUSG00000037152	Ndufc1	1
ENSMUSG00000037166	Ppp1r14a	1
ENSMUSG00000037262	Kin	1
ENSMUSG00000037296	Lsm1	1
ENSMUSG00000037361	Sf3b6	1
ENSMUSG00000037363	Letm2	1
ENSMUSG00000037434	Slc30a1	1
ENSMUSG00000037499	Nenf	1
ENSMUSG00000037531	Mrpl47	1
ENSMUSG00000037563	Rps16	1
ENSMUSG00000037625	Cldn11	1
ENSMUSG00000037628	Cdkn3	1
ENSMUSG00000037679	Inf2	1
ENSMUSG00000037681	Esyt3	1
ENSMUSG00000037710	Cisd1	1
ENSMUSG00000037742	Eef1a1	1
ENSMUSG00000037772	Mrpl23	1
ENSMUSG00000037805	Rpl10a	1
ENSMUSG00000037894	H2az1	1
ENSMUSG00000037938	Chchd5	1
ENSMUSG00000037960	Card19	1
ENSMUSG00000037971	Cfap68	1
ENSMUSG00000037991	Rmi2	1
ENSMUSG00000038002	Cramp1	1
ENSMUSG00000038135	Crygn	1
ENSMUSG00000038143	Stox2	1
ENSMUSG00000038152	5033430I15Rik	1
ENSMUSG00000038193	Hand2	1
ENSMUSG00000038274	Fau	1
ENSMUSG00000038352	Arl5c	1
ENSMUSG00000038384	Setd1b	1
ENSMUSG00000038412	Higd1a	1
ENSMUSG00000038437	Mllt6	1
ENSMUSG00000038467	Chmp4b	1
ENSMUSG00000038489	Polr2l	1
ENSMUSG00000038539	Atf5	1
ENSMUSG00000038607	Gng10	1
ENSMUSG00000038622	Med30	1
ENSMUSG00000038690	Atp5mf	1
ENSMUSG00000038695	Josd2	1
ENSMUSG00000038717	Atp5mg	1
ENSMUSG00000038722	Bud31	1
ENSMUSG00000038740	Mvb12b	1
ENSMUSG00000038793	Lefty1	1
ENSMUSG00000038803	Ost4	1
ENSMUSG00000038811	Gngt2	1
ENSMUSG00000038812	Trmt112	1
ENSMUSG00000038880	Mrps34	1
ENSMUSG00000038900	Rpl12	1
ENSMUSG00000038954	Supt3	1
ENSMUSG00000039001	Rps21	1
ENSMUSG00000039016	Timm8b	1
ENSMUSG00000039105	Atp6v1g1	1
ENSMUSG00000039163	Cmc1	1
ENSMUSG00000039195	Bbln	1
ENSMUSG00000039221	Rpl22l1	1
ENSMUSG00000039450	Dcxr	1
ENSMUSG00000039452	Snx22	1
ENSMUSG00000039478	Micu3	1
ENSMUSG00000039481	Nrtn	1
ENSMUSG00000039521	Foxp3	1
ENSMUSG00000039617	Gm7488	1
ENSMUSG00000039670	Oxld1	1
ENSMUSG00000039678	Tbc1d13	1
ENSMUSG00000039680	Mrps6	1
ENSMUSG00000039737	Prkrip1	1
ENSMUSG00000039759	Thap3	1
ENSMUSG00000039770	Ypel5	1
ENSMUSG00000039771	Polr2j	1
ENSMUSG00000039798	2600006K01Rik	1
ENSMUSG00000040022	Rab11fip2	1
ENSMUSG00000040037	Negr1	1
ENSMUSG00000040048	Ndufb10	1
ENSMUSG00000040121	Rep15	1
ENSMUSG00000040139	9430038I01Rik	1
ENSMUSG00000040212	Emp3	1
ENSMUSG00000040269	Mrps28	1
ENSMUSG00000040365	Trim41	1
ENSMUSG00000040429	Mterf1a	1
ENSMUSG00000040466	Blvrb	1
ENSMUSG00000040481	Bptf	1
ENSMUSG00000040767	Snrnp25	1
ENSMUSG00000040794	C1qtnf4	1
ENSMUSG00000040824	Snrpd2	1
ENSMUSG00000040883	Tmem205	1
ENSMUSG00000040904	Gm21988	1
ENSMUSG00000040928	S100pbp	1
ENSMUSG00000040952	Rps19	1
ENSMUSG00000041035	Dpcd	1
ENSMUSG00000041084	Ostc	1
ENSMUSG00000041126	H2az2	1
ENSMUSG00000041203	Trir	1
ENSMUSG00000041258	Zfp236	1
ENSMUSG00000041355	Ssr2	1
ENSMUSG00000041453	Rpl21	1
ENSMUSG00000041530	Ago1	1
ENSMUSG00000041560	Nop53	1
ENSMUSG00000041571	Selenow	1
ENSMUSG00000041617	Ccdc74a	1
ENSMUSG00000041697	Cox6a1	1
ENSMUSG00000041736	Tspo	1
ENSMUSG00000041774	Ydjc	1
ENSMUSG00000041777	Cir1	1
ENSMUSG00000041841	Rpl37	1
ENSMUSG00000041881	Ndufa7	1
ENSMUSG00000041954	Tnfrsf18	1
ENSMUSG00000041959	S100a10	1
ENSMUSG00000042043	Tbca	1
ENSMUSG00000042073	Abhd14b	1
ENSMUSG00000042106	Inka1	1
ENSMUSG00000042198	Chchd7	1
ENSMUSG00000042210	Abhd14a	1
ENSMUSG00000042293	Gm5617	1
ENSMUSG00000042312	S100a13	1
ENSMUSG00000042423	Fbrs	1
ENSMUSG00000042462	Dctpp1	1
ENSMUSG00000042505	Sdhaf3	1
ENSMUSG00000042541	Sem1	1
ENSMUSG00000042569	Dhrs7b	1
ENSMUSG00000042670	Immp1l	1
ENSMUSG00000042675	Ypel3	1
ENSMUSG00000042682	Selenok	1
ENSMUSG00000042712	Tceal9	1
ENSMUSG00000042737	Dpm3	1
ENSMUSG00000042745	Id1	1
ENSMUSG00000042747	Krtcap2	1
ENSMUSG00000042750	Bex2	1
ENSMUSG00000042903	Foxo4	1
ENSMUSG00000042962	Gm5436	1
ENSMUSG00000043162	Pyurf	1
ENSMUSG00000043279	Trim56	1
ENSMUSG00000043282	Teddm1b	1
ENSMUSG00000043432	Leng9	1
ENSMUSG00000043483	Gm6863	1
ENSMUSG00000043488	Frmd8os	1
ENSMUSG00000043510	Hscb	1
ENSMUSG00000043614	Vps37d	1
ENSMUSG00000043618	Eif5al3-ps	1
ENSMUSG00000043633	Fam221b	1
ENSMUSG00000043644	0610009L18Rik	1
ENSMUSG00000043687	1190005I06Rik	1
ENSMUSG00000043715	Or7r1	1
ENSMUSG00000043716	Rpl7	1
ENSMUSG00000043770	Gm12481	1
ENSMUSG00000043794	D830025C05Rik	1
ENSMUSG00000043801	Oaz1-ps	1
ENSMUSG00000043866	Taf10	1
ENSMUSG00000043987	Cep164	1
ENSMUSG00000043991	Pura	1
ENSMUSG00000043993	2900052L18Rik	1
ENSMUSG00000044080	S100a1	1
ENSMUSG00000044145	1810024B03Rik	1
ENSMUSG00000044176	Spink10	1
ENSMUSG00000044177	Wfikkn2	1
ENSMUSG00000044258	Ctla2a	1
ENSMUSG00000044330	Gm9790	1
ENSMUSG00000044339	Alkbh2	1
ENSMUSG00000044365	Cxxc4	1
ENSMUSG00000044442	N6amt1	1
ENSMUSG00000044533	Rps2	1
ENSMUSG00000044550	Tceal3	1
ENSMUSG00000044609	Gm9294	1
ENSMUSG00000044627	Swi5	1
ENSMUSG00000044647	Csrnp3	1
ENSMUSG00000044709	Gemin7	1
ENSMUSG00000044751	Atp5pb-ps	1
ENSMUSG00000044813	Shb	1
ENSMUSG00000044894	Uqcrq	1
ENSMUSG00000044927	H1f10	1
ENSMUSG00000044991	Shld1	1
ENSMUSG00000045031	Cetn4	1
ENSMUSG00000045038	Prkce	1
ENSMUSG00000045055	Rpsa-ps2	1
ENSMUSG00000045104	Ldhb-ps	1
ENSMUSG00000045106	Ccdc73	1
ENSMUSG00000045107	Saysd1	1
ENSMUSG00000045128	Rpl18a	1
ENSMUSG00000045136	Tubb2b	1
ENSMUSG00000045160	Bola3	1
ENSMUSG00000045257	Morn2	1
ENSMUSG00000045377	Tmem88	1
ENSMUSG00000045435	Tmem60	1
ENSMUSG00000045438	Cox19	1
ENSMUSG00000045455	Gm9797	1
ENSMUSG00000045690	Wdr89	1
ENSMUSG00000045709	Smkr-ps	1
ENSMUSG00000045799	Gm9800	1
ENSMUSG00000045826	Ptprcap	1
ENSMUSG00000045854	Lyrm2	1
ENSMUSG00000045886	Pam16l	1
ENSMUSG00000045948	Mrps12	1
ENSMUSG00000045996	Polr2k	1
ENSMUSG00000046031	Calhm6	1
ENSMUSG00000046229	Scand1	1
ENSMUSG00000046245	Pilra	1
ENSMUSG00000046330	Rpl37a	1
ENSMUSG00000046364	Rpl27a	1
ENSMUSG00000046432	Bex3	1
ENSMUSG00000046447	Camk2n1	1
ENSMUSG00000046516	Cox17	1
ENSMUSG00000046532	Ar	1
ENSMUSG00000046574	Prr12	1
ENSMUSG00000046580	Gm7862	1
ENSMUSG00000046721	Rpl14-ps1	1
ENSMUSG00000046814	Gchfr	1
ENSMUSG00000046876	Atxn1	1
ENSMUSG00000046991	Wdr27	1
ENSMUSG00000047067	Dusp28	1
ENSMUSG00000047215	Rpl9	1
ENSMUSG00000047238	Mageh1	1
ENSMUSG00000047446	Arl4a	1
ENSMUSG00000047459	Dynlrb1	1
ENSMUSG00000047507	Baiap3	1
ENSMUSG00000047613	A430005L14Rik	1
ENSMUSG00000047632	Fgfbp3	1
ENSMUSG00000047649	Polr1g	1
ENSMUSG00000047675	Rps8	1
ENSMUSG00000047676	Rpsa-ps10	1
ENSMUSG00000047692	4930533K18Rik	1
ENSMUSG00000047721	Bola2	1
ENSMUSG00000047843	Bri3	1
ENSMUSG00000047844	Bex4	1
ENSMUSG00000047880	Cxcr5	1
ENSMUSG00000047907	Tshz2	1
ENSMUSG00000048047	Zbtb33	1
ENSMUSG00000048164	Gm7204	1
ENSMUSG00000048406	NA	1
ENSMUSG00000048481	Mypop	1
ENSMUSG00000048581	E130311K13Rik	1
ENSMUSG00000048583	Igf2	1
ENSMUSG00000048603	Gm9828	1
ENSMUSG00000048731	Ggnbp1	1
ENSMUSG00000048747	E130114P18Rik	1
ENSMUSG00000048758	Rpl29	1
ENSMUSG00000048772	Tmem53	1
ENSMUSG00000048827	Pkd1l3	1
ENSMUSG00000048878	Hexim1	1
ENSMUSG00000048960	Prex2	1
ENSMUSG00000049124	Gm8186	1
ENSMUSG00000049235	Gm7324	1
ENSMUSG00000049265	Kcnk3	1
ENSMUSG00000049285	Mblac1	1
ENSMUSG00000049299	Trappc1	1
ENSMUSG00000049336	Tenm2	1
ENSMUSG00000049517	Rps23	1
ENSMUSG00000049539	H1f1	1
ENSMUSG00000049721	Gal3st1	1
ENSMUSG00000049751	Rpl36al	1
ENSMUSG00000049760	Micos13	1
ENSMUSG00000049775	Tmsb4x	1
ENSMUSG00000049823	Zbtb12	1
ENSMUSG00000049832	Rbx1-ps	1
ENSMUSG00000049881	2810025M15Rik	1
ENSMUSG00000049950	Rpp38	1
ENSMUSG00000049960	Mrps16	1
ENSMUSG00000050071	Bex1	1
ENSMUSG00000050188	Lsm10	1
ENSMUSG00000050212	Eva1b	1
[truncated: 8,036 more rows]

## Sheet: Module GO Enrichments
ID	Description	GeneRatio	BgRatio	RichFactor	FoldEnrichment	zScore	pvalue	p.adjust	qvalue	geneID	Count	gene_set
GO:0030198	extracellular matrix organization	'232/7948'	321/19294	0.722741	1.75448	11.4087	6.03066e-30	3.83007e-26	2.48273e-26	Axin2/Fap/Egfl6/Myf5/Pparg/Loxl3/Mmp11/Col6a1/Ramp2/Hpn/Col18a1/Col1a1/Fkbp10/Tgfb1/Lamb1/Elf3/Ddr1/Col5a3/Large1/Plod3/Fgfr4/Nid1/Fbln1/Adamts4/Ihh/Aplp1/Sulf2/P3h4/Cav1/Optc/Serac1/Tnr/Adamtsl4/Sulf1/Matn4/Mmp9/Pmp22/Lama2/P4ha1/Ccn2/Ntn4/Aebp1/Matn3/Pxdn/Itgb3/Gfap/Vipas39/Smoc1/Fbln5/Papln/Tfap2a/Ero1a/Lcp1/Rb1/Cma1/Sema5a/Matn2/Has2/Col14a1/Adamts20/Col2a1/Ptk2/Ccdc80/Meltf/App/Adamts1/Adamt…	232	ALL_DEGs
GO:0045229	external encapsulating structure organization	'232/7948'	322/19294	0.720497	1.74903	11.3443	1.28527e-29	4.08137e-26	2.64562e-26	Axin2/Fap/Egfl6/Myf5/Pparg/Loxl3/Mmp11/Col6a1/Ramp2/Hpn/Col18a1/Col1a1/Fkbp10/Tgfb1/Lamb1/Elf3/Ddr1/Col5a3/Large1/Plod3/Fgfr4/Nid1/Fbln1/Adamts4/Ihh/Aplp1/Sulf2/P3h4/Cav1/Optc/Serac1/Tnr/Adamtsl4/Sulf1/Matn4/Mmp9/Pmp22/Lama2/P4ha1/Ccn2/Ntn4/Aebp1/Matn3/Pxdn/Itgb3/Gfap/Vipas39/Smoc1/Fbln5/Papln/Tfap2a/Ero1a/Lcp1/Rb1/Cma1/Sema5a/Matn2/Has2/Col14a1/Adamts20/Col2a1/Ptk2/Ccdc80/Meltf/App/Adamts1/Adamt…	232	ALL_DEGs
GO:0043062	extracellular structure organization	'232/7948'	323/19294	0.718266	1.74361	11.28	2.71745e-29	5.75285e-26	3.72911e-26	Axin2/Fap/Egfl6/Myf5/Pparg/Loxl3/Mmp11/Col6a1/Ramp2/Hpn/Col18a1/Col1a1/Fkbp10/Tgfb1/Lamb1/Elf3/Ddr1/Col5a3/Large1/Plod3/Fgfr4/Nid1/Fbln1/Adamts4/Ihh/Aplp1/Sulf2/P3h4/Cav1/Optc/Serac1/Tnr/Adamtsl4/Sulf1/Matn4/Mmp9/Pmp22/Lama2/P4ha1/Ccn2/Ntn4/Aebp1/Matn3/Pxdn/Itgb3/Gfap/Vipas39/Smoc1/Fbln5/Papln/Tfap2a/Ero1a/Lcp1/Rb1/Cma1/Sema5a/Matn2/Has2/Col14a1/Adamts20/Col2a1/Ptk2/Ccdc80/Meltf/App/Adamts1/Adamt…	232	ALL_DEGs
GO:0061448	connective tissue development	'213/7948'	307/19294	0.693811	1.68425	10.1149	8.25246e-24	1.31028e-20	8.49351e-21	Wnt9a/Axin2/Fgf6/Myf5/Pparg/Abhd15/Col6a1/Col1a1/Spi1/Paxip1/Ppard/Tgfb1/Glg1/Large1/Ccn4/Por/Mef2c/Bbs1/Ihh/Sulf2/Scube2/Nfib/Bmp7/Optc/Trpv4/Csf1/Stc1/Lpl/Gata3/Sulf1/Rarb/Epyc/Arid5b/Ccn2/Igf1/Sirt1/Efemp1/Matn3/Id2/Ncoa1/Itgb3/Rflnb/Hif1a/Gli3/Gpld1/Edn1/Id4/Ogn/Ror2/Msx2/Pitx1/Thrb/Bmp4/Fgf9/Wnt5a/Cnmd/Ebf2/Rb1/Osr2/Wnt7b/Col2a1/Snai2/Runx1/Poc1a/Dlx2/Six2/Sox8/Zeb1/Pkdcc/Col11a2/Lox/Pdgfrb/…	213	ALL_DEGs
GO:0051216	cartilage development	'163/7948'	220/19294	0.740909	1.79858	9.97046	2.50509e-23	3.18196e-20	2.06261e-20	Wnt9a/Axin2/Fgf6/Myf5/Col6a1/Col1a1/Tgfb1/Glg1/Ccn4/Por/Mef2c/Bbs1/Ihh/Sulf2/Scube2/Nfib/Bmp7/Optc/Trpv4/Stc1/Gata3/Sulf1/Rarb/Epyc/Ccn2/Efemp1/Matn3/Rflnb/Hif1a/Gli3/Gpld1/Edn1/Ogn/Ror2/Msx2/Pitx1/Thrb/Bmp4/Fgf9/Wnt5a/Cnmd/Rb1/Osr2/Wnt7b/Col2a1/Snai2/Runx1/Poc1a/Dlx2/Six2/Zeb1/Pkdcc/Col11a2/Ltbp3/Itgb8/Col3a1/Col9a1/Nppc/Snorc/Cfh/Prrx1/Frzb/Ext2/Mdk/Bmp2/Otor/Nfatc2/Shox2/Col11a1/Sfrp2/Thbs3/Ec…	163	ALL_DEGs
GO:0097485	neuron projection guidance	'174/7948'	242/19294	0.719008	1.74541	9.76657	2.25093e-22	2.3826e-19	1.54445e-19	Ngfr/Wnt3/Lhx2/Cdh4/Sema4f/Sema6b/Efnb2/Lamb1/Efnb3/Etv1/Evx1/Mef2c/Ephb3/Fzd3/Nfib/Bmp7/Gata3/Lama5/Rac3/Scn1b/Sema6a/Lama2/Ntn4/Mypn/Unc5b/Cyfip2/Nrcam/Ntn1/Evl/Gli3/Edn1/Sema4d/Ptch1/Emb/Sema3g/Wnt5a/Gdnf/Sema5a/Trio/Matn2/Wnt7b/Nell2/Alcam/Boc/Robo1/App/Bsg/Celsr3/Vegfa/Gfra3/Lama3/Diaph1/Myot/Csf1r/Slit1/Ablim1/Sema4g/Ark2c/Usp33/Nrp1/Unc5a/Klf7/Nrp2/Sema4c/Epha4/Nfasc/Lamc1/Lamc2/Vangl2/Lam…	174	ALL_DEGs
GO:0007411	axon guidance	'173/7948'	241/19294	0.717842	1.74258	9.70911	3.97441e-22	3.60592e-19	2.33743e-19	Ngfr/Wnt3/Lhx2/Cdh4/Sema4f/Sema6b/Efnb2/Lamb1/Efnb3/Etv1/Evx1/Mef2c/Ephb3/Fzd3/Nfib/Bmp7/Gata3/Lama5/Rac3/Scn1b/Sema6a/Lama2/Ntn4/Mypn/Unc5b/Cyfip2/Nrcam/Ntn1/Evl/Gli3/Edn1/Sema4d/Ptch1/Emb/Sema3g/Wnt5a/Gdnf/Sema5a/Trio/Matn2/Wnt7b/Nell2/Alcam/Boc/Robo1/App/Bsg/Celsr3/Vegfa/Gfra3/Lama3/Diaph1/Myot/Csf1r/Slit1/Ablim1/Sema4g/Ark2c/Usp33/Nrp1/Unc5a/Klf7/Nrp2/Sema4c/Epha4/Nfasc/Lamc1/Lamc2/Vangl2/Lam…	173	ALL_DEGs
GO:0072001	renal system development	'223/7948'	340/19294	0.655882	1.59217	9.22031	5.15421e-20	4.0918e-17	2.65239e-17	Ift20/Efnb2/Irx2/Itga3/Akr1b1/Hoxc11/Tgfb1/Aqp1/Pgf/Cd44/Nid1/Mef2c/Tek/Sulf2/Crlf1/Hdac5/Bmp7/Aldh1a2/Klhl3/Bicc1/Dll1/Gata3/Lama5/Wnt11/Ift27/Sulf1/Rarb/Mmp9/Ahr/Sim1/Arid5b/Sgpl1/Lgr5/Ddc/Wdpcp/Id2/Ace/Itgb3/Tshz3/Gli3/Tfap2a/Edn1/Ptch1/Ndufs6/Vcan/Fgf10/Dlg5/Bmp4/Wnt5a/Nkx3-1/Ednrb/Gdnf/Rrm2b/Angpt1/Osr2/Myc/Mtss1/Wnt7b/Hes1/Robo1/Adamts1/Vegfa/Ptk7/Six2/Sox8/Pdgfrb/Pcsk5/Ovol1/Rbp4/Hells/Arl…	223	ALL_DEGs
GO:0007409	axonogenesis	'302/7948'	493/19294	0.612576	1.48705	9.16876	8.38019e-20	5.57701e-17	3.61512e-17	Ngfr/Wnt3/Lhx2/Cdh1/Cdh4/Sema4f/Bcl11a/Sema6b/Efnb2/Rnd2/Metrn/Tsc2/Lamb1/Apoe/Stk11/Efnb3/Etv1/Ulk2/Crabp2/Evx1/Igf1r/Mef2c/Eif4g2/Ephb3/Aplp1/Fzd3/Nfib/Bmp7/Map2/Xk/Gata3/Lama5/Tnr/B4galt5/Rac3/Pmp22/Mapt/Scn1b/Sema6a/Lama2/Ntn4/Mypn/Unc5b/Cobl/Adarb1/Cyfip2/Nefh/Adcy1/Llgl1/Nrcam/Ntn1/Nin/Evl/Gli3/Edn1/Sema4d/Ptch1/Arhgef28/Emb/Vcl/Sema3g/Atp8a2/Wnt5a/Nefm/Nefl/Gdnf/Sema5a/Trio/Matn2/Wnt7b/Nel…	302	ALL_DEGs
GO:0001667	ameboidal-type cell migration	'284/7948'	458/19294	0.620087	1.50528	9.15963	9.15472e-20	5.57701e-17	3.61512e-17	Gna12/Itgb2/Alox12/Fap/Pparg/Acvrl1/Acvr1b/Sema4f/Serpinf1/Il4/Timp1/Sema6b/Efnb2/Col18a1/Itga3/Jup/Marveld3/Paxip1/Ppard/Tsc2/Tgfb1/Prkd1/Apoe/Klf4/Stat5a/Gab2/Coro1c/Aqp1/Hdac9/Hspb1/Hmox1/Mef2c/Kit/Tek/Epha2/Fut1/Rab25/Hdac5/Bmp7/Tbx1/Met/Hyal1/Stc1/Gata2/Sash1/Itga2/Gata3/Lama5/Wnt11/Stard13/Plcg1/Sdc4/Cd40/Mmp9/Pmp22/Pfn1/Adora2b/Cenpv/Sparc/Sema6a/Dcn/Arid5b/Kitl/Igf1/Sirt1/Sgpl1/Ptprr/Appl…	284	ALL_DEGs
GO:0001503	ossification	'269/7948'	429/19294	0.62704	1.52216	9.15395	9.65943e-20	5.57701e-17	3.61512e-17	Wnt3/Axin2/Myf5/Pparg/Col6a1/Col1a1/Lrp3/Tgfb1/Prkd1/Nab1/Clec11a/Ccn4/Mef2c/Epha2/Actn3/Ihh/Chrd/Clic1/Scube2/Twist2/Fhl2/Hdac5/Clec3a/Bmp7/Git1/Atraid/Pam16/Csf1/Stc1/Wnt11/Ahr/Gdpd2/Ccn2/Igf1/Srgn/Fstl3/Kremen1/Igfbp3/Map2k6/Rsad2/Id2/Rflnb/Hif1a/Erh/Smoc1/Gli3/Gpld1/Tfap2a/Id4/Aspn/Sema4d/Ptch1/Msx2/Pdlim7/Il6st/Thrb/Bmp4/Gdf10/Fgf9/Wnt5a/Tnfsf11/Cnmd/Ank/Osr2/Mtss1/Wnt7b/Hdac7/Vdr/Col2a1/Trp…	269	ALL_DEGs
GO:0031589	cell-substrate adhesion	'236/7948'	367/19294	0.643052	1.56103	9.08203	1.84219e-19	9.74978e-17	6.32e-17	Itgb2/Egfl6/Myf5/Acvrl1/Itga5/Col1a1/Itga3/Jup/Vwf/Ppard/Axl/Lamb1/Cd36/Dusp3/Ddr1/Col5a3/Col26a1/Coro1c/Bcan/Nid1/Itgae/Ephb3/Fbln1/Tek/Actn3/Fut1/Bcr/Mertk/Csf1/Actn1/Itga2/Lama5/Cd34/Sdc4/Crk/Rac3/Stk4/Ccn2/Ntn4/Madcam1/Wdpcp/Agr2/Itgb3/Pecam1/Itgb4/Smoc1/Atxn3/Carmil1/Gcnt2/Nedd9/Nid2/Vcl/Olfm4/Dmtn/Dab2/Ajuba/Angpt1/Has2/Enpp2/Parvg/Emp2/Bcl6/Apod/Ptk2/Cd96/Ccdc80/Meltf/Itgb5/St6gal1/Smoc2/T…	236	ALL_DEGs
GO:0034329	cell junction assembly	'287/7948'	467/19294	0.614561	1.49186	9.00577	3.65083e-19	1.78357e-16	1.15615e-16	Cdh1/Cdh4/Acvrl1/Itga5/Gabra2/Ramp2/Efnb2/Jup/Marveld3/Rhoc/Adgre5/Dusp3/Efnb3/Large1/Coro1c/Mef2c/Ephb3/Tek/Epha2/Actn3/Gabrb2/Cav1/Clstn3/Elavl2/Bcr/Gabra1/Trpv4/Actn1/Zdhhc12/Ace2/Itga2/Wnt11/Sdc4/Myo1c/Crk/Pmp22/Tbx5/Mapt/Cldn7/Wdpcp/Gria1/Ace/Itgb3/Asic2/Pecam1/Itgb4/Fbf1/Dlg4/Ntn1/Akap5/Prkch/Sema4d/Marveld2/Ocln/Dlg5/Vcl/Wnt5a/Dmtn/Cldn10/Ajuba/Cdh10/Nptxr/Enpp2/Sh3bp1/Hdac7/Cldn1/Il1rap/A…	287	ALL_DEGs
GO:0061138	morphogenesis of a branching epithelium	'158/7948'	224/19294	0.705357	1.71227	8.97436	4.12119e-19	1.86955e-16	1.21188e-16	Tbx2/Cdh1/Hoxd13/Tgfb1/Ddr1/Pgf/Cd44/Tek/Epha2/Ihh/Bmp7/Tbx1/Met/Wnt2/Etv5/Csf1/Notch4/Lama5/Celsr1/Ctsz/Sulf1/Stk4/Tbx3/Ahr/Esr1/Rspo3/Ntn4/Igf1/Frs2/Ccl11/Llgl2/Gli3/Edn1/Ptch1/Msx2/Fgf10/Dlg5/Bmp4/Wnt5a/Nkx3-1/Spry2/Gdnf/Sema5a/Angpt1/Myc/Vdr/Trp63/Snai2/Nfatc4/Vegfa/Six2/Sox8/Slc12a2/Nrp1/Pdgfa/Rdh10/Eya1/Vangl2/Eng/Abl1/Notch1/Fgf7/Mdk/Dll4/Spint1/Bmp2/Ncoa3/Wnt2b/Lef1/Sfrp2/Pitx2/Tnc/Tfap2c…	158	ALL_DEGs
GO:0001763	morphogenesis of a branching structure	'169/7948'	244/19294	0.692623	1.68136	8.96464	4.73772e-19	2.00595e-16	1.3003e-16	Tbx2/Cdh1/Bcl11a/Hoxd13/Tgfb1/Ddr1/Pgf/Cd44/Tek/Epha2/Ihh/Bmp7/Tbx1/Met/Wnt2/Etv5/Csf1/Notch4/Lama5/Celsr1/Ctsz/Sulf1/Stk4/Tbx3/Ahr/Esr1/Rspo3/Ntn4/Igf1/Frs2/Ccl11/Llgl2/Gli3/Edn1/Ptch1/Msx2/Fgf10/Dlg5/Bmp4/Wnt5a/Nkx3-1/Spry2/Gdnf/Sema5a/Ctnnd2/Angpt1/Myc/Vdr/Trp63/Snai2/Dlx2/Nfatc4/Vegfa/Six2/Sox8/Slc12a2/Nrp1/Pdgfa/Rdh10/Eya1/Vangl2/Eng/Ermn/Abl1/Notch1/Fgf7/Mdk/Dll4/Spint1/Bmp2/Ncoa3/Shox2/Wnt…	169	ALL_DEGs
GO:0001822	kidney development	'211/7948'	324/19294	0.651235	1.58089	8.82553	1.79392e-18	7.12072e-16	4.61579e-16	Ift20/Efnb2/Irx2/Itga3/Akr1b1/Hoxc11/Tgfb1/Aqp1/Pgf/Cd44/Nid1/Mef2c/Tek/Sulf2/Crlf1/Bmp7/Klhl3/Bicc1/Dll1/Gata3/Lama5/Wnt11/Ift27/Sulf1/Rarb/Mmp9/Ahr/Sim1/Arid5b/Sgpl1/Ddc/Wdpcp/Id2/Ace/Itgb3/Tshz3/Gli3/Tfap2a/Edn1/Ptch1/Ndufs6/Vcan/Fgf10/Dlg5/Bmp4/Wnt5a/Nkx3-1/Ednrb/Gdnf/Rrm2b/Angpt1/Osr2/Myc/Mtss1/Wnt7b/Hes1/Robo1/Adamts1/Vegfa/Ptk7/Six2/Sox8/Pdgfrb/Pcsk5/Ovol1/Hells/Arl3/Nrp1/Pdgfa/Sox17/Rdh10…	211	ALL_DEGs
GO:0060562	epithelial tube morphogenesis	'243/7948'	386/19294	0.629534	1.52821	8.77376	2.85185e-18	1.06542e-15	6.90624e-16	Tbx2/Lhx2/Alox12/Acvrl1/Sec24b/Efnb2/Irx2/Tulp3/Brpf1/Tsc2/Tgfb1/Dvl3/Ddr1/Pgf/Prkacb/Cd44/Mef2c/Tek/Epha2/Ihh/Tcap/Fzd3/Hdac5/Bmp7/Tbx1/Met/Wnt2/Etv5/Aldh1a2/Klhl3/Csf1/Dll1/Notch4/Gata3/Lama5/Celsr1/Stard13/Ctsz/Sdc4/Stk4/Pfn1/Tbx3/Sfrp5/Ahr/Esr1/Igf1/Lgr5/Cobl/Ccl11/Ntn1/Hif1a/Ryr2/Gli3/Tfap2a/Edn1/Ptch1/Msx2/Cdk20/Fgf10/Dlg5/Bmp4/Gata4/Wnt5a/Nkx3-1/Spry2/Gdnf/Sema5a/Fzd6/Angpt1/Myc/Mtss1/Vdr/…	243	ALL_DEGs
GO:0002062	chondrocyte differentiation	'96/7948'	120/19294	0.8	1.94202	8.6637	3.21918e-18	1.13583e-15	7.3627e-16	Wnt9a/Axin2/Tgfb1/Glg1/Ccn4/Por/Mef2c/Ihh/Sulf2/Scube2/Nfib/Sulf1/Rarb/Ccn2/Efemp1/Rflnb/Hif1a/Gli3/Gpld1/Ror2/Msx2/Thrb/Bmp4/Fgf9/Rb1/Osr2/Col2a1/Snai2/Runx1/Poc1a/Six2/Pkdcc/Col11a2/Ltbp3/Col3a1/Nppc/Ext2/Mdk/Bmp2/Shox2/Col11a1/Sfrp2/Ecm1/Hspg2/Fosl2/Prkg2/Wnt7a/Acan/Chrdl2/Fgfr1/Eif2ak3/Comp/Smpd3/Snx19/Adamts7/Smad3/Tgfbr2/Pth1r/Scx/Loxl2/Slc26a2/Chst11/Mex3c/Ccn3/Arid5a/Rflna/Hoxa11/Gdf5/Cre…	96	ALL_DEGs
GO:0050673	epithelial cell proliferation	'293/7948'	490/19294	0.597959	1.45156	8.4742	3.6028e-17	1.20428e-14	7.8064e-15	Tbx2/Ngfr/Ccnd2/Cdh1/Fap/Pparg/Acvrl1/Serpinf1/Uhrf1/Hpn/Efnb2/Col18a1/Marveld3/Stat6/Ppard/Tsc2/Tgfb1/Prkd1/Apoe/Stk11/Rps6ka1/Stat3/Stat5a/Il12b/Bid/Pgf/Hmox1/Celf1/Mef2c/Kit/Htra1/Tek/Epha2/Cyba/Ihh/Sulf2/Cav1/Bcl2l1/Twist2/Fut1/Nfib/Tbx1/Hyal1/Wnt2/Aldh1a2/Gata2/Gata3/Lama5/Ncf1/Cd34/Sulf1/Plcg1/Igfbp4/Birc5/Stk4/Adora2b/Sparc/Mydgf/Fmc1/Esr1/Arg1/Igf1/Sirt1/Egfr/Lgr5/Frs2/Flt4/Igfbp3/Id2/Ccl…	293	ALL_DEGs
GO:0140236	translation at presynapse	'46/7948'	47/19294	0.978723	2.37588	7.90415	4.98922e-17	1.58433e-14	1.02699e-14	Rpl13/Rps11/Rpl8/Rpl10/Rps15a/Rpl15/Rps5/Rps27a/Rps14/Rps24/Rps26/Rplp2/Rpl14/Rpl22/Rpl6/Rpl28/Rps16/Rpl10a/Rpl12/Rpl37/Rpl7/Rpl37a/Rpl27a/Rpl9/Rpl29/Rps10/Rpl38/Rpl32/Rpl36/Rpl23a/Rpl5/Rpl35a/Rpl26/Rps12/Rpl34/Rpl17/Rpl7a/Rpl35/Rpl27/Rps28/Rpl23/Rpl13a/Rpl36a/Uba52/Rps27/Rpl24	46	ALL_DEGs
GO:0060485	mesenchyme development	'199/7948'	308/19294	0.646104	1.56844	8.41681	6.01073e-17	1.81782e-14	1.17834e-14	Tbx2/Axin2/Acvrl1/Sema4f/Loxl3/Sema6b/Hpn/Meox1/Col1a1/Tsc2/Tgfb1/Dll3/Coro1c/Mef2c/Chrd/Bmp7/Tbx1/Wnt2/Aldh1a2/Notch4/Gata3/Lama5/Wnt11/Erbb3/Tbx5/Tbx3/Sema6a/Hey2/Kitl/Timp3/Pofut2/Rflnb/Gsc/Hif1a/Zfp36l1/Tgfb3/Tfap2a/Gcnt2/Edn1/Sema4d/Msx2/Fgf10/Dlg5/Bmp4/Sema3g/Gata4/Fgf9/Wnt5a/Spry2/Ednrb/Gdnf/Dab2/Sema5a/Myc/Has2/Wnt7b/Emp2/Hes1/Ptk2/Snai2/Robo1/Adamts5/Vegfa/Ptk7/Six2/Sox8/Bambi/Slc39a6/Cd…	199	ALL_DEGs
GO:0003012	muscle system process	'268/7948'	442/19294	0.606335	1.4719	8.40012	6.7957e-17	1.8749e-14	1.21535e-14	Tbx2/Rem1/Lck/Pparg/Col6a1/Calm1/Jup/Prkd1/Klf4/Large1/Ccn4/Mef2c/Irag1/Kit/Actn3/Cyba/Sulf2/Atp1a2/Casq1/Homer1/Cav1/Tcap/Mymk/Met/Myod1/Kcnq1/Psen2/Trpv4/Stc1/Ace2/Itga2/Ncf1/Cacna1d/Sulf1/Tnnc2/Stac2/Akap1/Adora2b/Tbx3/Scn1b/Calm3/Hey2/Ccn2/Igf1/Mybpc1/Sirt1/Meis1/Sgcd/Smtn/Map2k6/Fkbp1b/P2rx1/Myh3/Tshz3/Ryr2/Edn1/Drd1/Ndufs6/Pde4d/Ndufs4/Camk2g/Bmp4/Gata4/Atp8a2/Ednrb/Nup155/Gdnf/Fbxo32/Col14…	268	ALL_DEGs
GO:0048736	appendage development	'146/7948'	210/19294	0.695238	1.68771	8.38664	7.08511e-17	1.8749e-14	1.21535e-14	Tbx2/Tbx4/Wnt3/Wnt9a/Gna12/Hoxa10/Col6a1/Tulp3/Hoxc11/Naglu/Evx2/Hoxd13/Hoxd12/Map3k20/Large1/Crabp2/Ihh/Bmp7/Psen2/Aldh1a2/Alx3/Rarb/Tbx5/Tbx3/Wdpcp/Kremen1/Itgb4/Med31/Tmem107/Smoc1/Gli3/Tfap2a/Ror2/Ptch1/Msx2/Pitx1/Fgf10/Bmp4/Fgf9/Wnt5a/Fzd6/Osr2/Col2a1/Hoxc10/Trp63/Ift140/Pkdcc/Rax/Sall3/Pcsk5/Dkk1/Ark2c/Rdh10/Tfap2b/Col3a1/Prrx1/Irf6/Plxna2/Notch1/Itga6/Bcl2l11/Sall4/Mecom/Slc7a11/Mbnl1/Shox…	146	ALL_DEGs
GO:0060173	limb development	'146/7948'	210/19294	0.695238	1.68771	8.38664	7.08511e-17	1.8749e-14	1.21535e-14	Tbx2/Tbx4/Wnt3/Wnt9a/Gna12/Hoxa10/Col6a1/Tulp3/Hoxc11/Naglu/Evx2/Hoxd13/Hoxd12/Map3k20/Large1/Crabp2/Ihh/Bmp7/Psen2/Aldh1a2/Alx3/Rarb/Tbx5/Tbx3/Wdpcp/Kremen1/Itgb4/Med31/Tmem107/Smoc1/Gli3/Tfap2a/Ror2/Ptch1/Msx2/Pitx1/Fgf10/Bmp4/Fgf9/Wnt5a/Fzd6/Osr2/Col2a1/Hoxc10/Trp63/Ift140/Pkdcc/Rax/Sall3/Pcsk5/Dkk1/Ark2c/Rdh10/Tfap2b/Col3a1/Prrx1/Irf6/Plxna2/Notch1/Itga6/Bcl2l11/Sall4/Mecom/Slc7a11/Mbnl1/Shox…	146	ALL_DEGs
GO:0048754	branching morphogenesis of an epithelial tube	'132/7948'	186/19294	0.709677	1.72276	8.28995	1.51365e-16	3.84528e-14	2.49258e-14	Tbx2/Tgfb1/Ddr1/Pgf/Cd44/Tek/Epha2/Ihh/Bmp7/Tbx1/Met/Wnt2/Etv5/Csf1/Notch4/Lama5/Celsr1/Ctsz/Stk4/Tbx3/Ahr/Esr1/Igf1/Ccl11/Gli3/Edn1/Ptch1/Msx2/Fgf10/Dlg5/Bmp4/Wnt5a/Nkx3-1/Spry2/Gdnf/Sema5a/Angpt1/Myc/Vdr/Nfatc4/Vegfa/Six2/Sox8/Slc12a2/Nrp1/Rdh10/Eya1/Vangl2/Eng/Abl1/Notch1/Mdk/Dll4/Bmp2/Ncoa3/Wnt2b/Lef1/Sfrp2/Pitx2/Tnc/Tfap2c/Pxn/Flt1/Plxnd1/Mgp/Pak1/Col4a1/Slit2/Ednra/Sall1/Pgr/Agt/Ctsh/Tgfbr2…	132	ALL_DEGs
GO:0035107	appendage morphogenesis	'127/7948'	178/19294	0.713483	1.732	8.21165	2.85499e-16	6.71557e-14	4.35317e-14	Tbx2/Tbx4/Wnt3/Wnt9a/Gna12/Hoxa10/Col6a1/Tulp3/Hoxc11/Evx2/Hoxd13/Hoxd12/Map3k20/Large1/Crabp2/Ihh/Bmp7/Psen2/Aldh1a2/Alx3/Rarb/Tbx5/Tbx3/Wdpcp/Tmem107/Gli3/Tfap2a/Ror2/Ptch1/Msx2/Pitx1/Fgf10/Bmp4/Fgf9/Wnt5a/Fzd6/Osr2/Col2a1/Hoxc10/Trp63/Ift140/Pkdcc/Sall3/Pcsk5/Dkk1/Ark2c/Rdh10/Tfap2b/Col3a1/Prrx1/Plxna2/Notch1/Bcl2l11/Sall4/Mecom/Mbnl1/Shox2/Notch2/Lef1/Sfrp2/Pitx2/Asph/Cibar1/Nfia/Sema3c/Errfi…	127	ALL_DEGs
GO:0035108	limb morphogenesis	'127/7948'	178/19294	0.713483	1.732	8.21165	2.85499e-16	6.71557e-14	4.35317e-14	Tbx2/Tbx4/Wnt3/Wnt9a/Gna12/Hoxa10/Col6a1/Tulp3/Hoxc11/Evx2/Hoxd13/Hoxd12/Map3k20/Large1/Crabp2/Ihh/Bmp7/Psen2/Aldh1a2/Alx3/Rarb/Tbx5/Tbx3/Wdpcp/Tmem107/Gli3/Tfap2a/Ror2/Ptch1/Msx2/Pitx1/Fgf10/Bmp4/Fgf9/Wnt5a/Fzd6/Osr2/Col2a1/Hoxc10/Trp63/Ift140/Pkdcc/Sall3/Pcsk5/Dkk1/Ark2c/Rdh10/Tfap2b/Col3a1/Prrx1/Plxna2/Notch1/Bcl2l11/Sall4/Mecom/Mbnl1/Shox2/Notch2/Lef1/Sfrp2/Pitx2/Asph/Cibar1/Nfia/Sema3c/Errfi…	127	ALL_DEGs
GO:0072006	nephron development	'114/7948'	156/19294	0.730769	1.77396	8.12348	5.47754e-16	1.24242e-13	8.05363e-14	Irx2/Itga3/Tgfb1/Aqp1/Pgf/Cd44/Nid1/Mef2c/Tek/Sulf2/Bmp7/Klhl3/Dll1/Gata3/Lama5/Sulf1/Ahr/Itgb3/Gli3/Tfap2a/Edn1/Ptch1/Bmp4/Ednrb/Gdnf/Angpt1/Myc/Mtss1/Wnt7b/Hes1/Vegfa/Six2/Sox8/Pdgfrb/Tfap2b/Eya1/Cfh/Kif26b/Vangl2/Notch1/Jag1/Bmp2/Wwtr1/Wnt2b/Notch2/Ampd2/Il6ra/Enpep/Calb1/Prom1/Sec61a1/Klf15/Ret/Ptpro/Angpt2/Ednra/Sall1/Irx3/Agt/Pdgfd/Kirrel3/Myo1e/Heyl/Wnt6/Lif/Six4/Wnk4/Tmem59l/Wnt4/Dchs1/Fg…	114	ALL_DEGs
GO:0140241	translation at synapse	'46/7948'	48/19294	0.958333	2.32638	7.70063	7.16413e-16	1.51665e-13	9.8312e-14	Rpl13/Rps11/Rpl8/Rpl10/Rps15a/Rpl15/Rps5/Rps27a/Rps14/Rps24/Rps26/Rplp2/Rpl14/Rpl22/Rpl6/Rpl28/Rps16/Rpl10a/Rpl12/Rpl37/Rpl7/Rpl37a/Rpl27a/Rpl9/Rpl29/Rps10/Rpl38/Rpl32/Rpl36/Rpl23a/Rpl5/Rpl35a/Rpl26/Rps12/Rpl34/Rpl17/Rpl7a/Rpl35/Rpl27/Rps28/Rpl23/Rpl13a/Rpl36a/Uba52/Rps27/Rpl24	46	ALL_DEGs
GO:0140242	translation at postsynapse	'46/7948'	48/19294	0.958333	2.32638	7.70063	7.16413e-16	1.51665e-13	9.8312e-14	Rpl13/Rps11/Rpl8/Rpl10/Rps15a/Rpl15/Rps5/Rps27a/Rps14/Rps24/Rps26/Rplp2/Rpl14/Rpl22/Rpl6/Rpl28/Rps16/Rpl10a/Rpl12/Rpl37/Rpl7/Rpl37a/Rpl27a/Rpl9/Rpl29/Rps10/Rpl38/Rpl32/Rpl36/Rpl23a/Rpl5/Rpl35a/Rpl26/Rps12/Rpl34/Rpl17/Rpl7a/Rpl35/Rpl27/Rps28/Rpl23/Rpl13a/Rpl36a/Uba52/Rps27/Rpl24	46	ALL_DEGs
GO:0072073	kidney epithelium development	'109/7948'	149/19294	0.731544	1.77584	7.95695	2.1082e-15	4.31858e-13	2.79938e-13	Efnb2/Irx2/Tgfb1/Aqp1/Pgf/Cd44/Mef2c/Crlf1/Bmp7/Klhl3/Dll1/Gata3/Lama5/Rarb/Sim1/Tshz3/Gli3/Edn1/Ptch1/Vcan/Bmp4/Ednrb/Gdnf/Myc/Mtss1/Wnt7b/Hes1/Vegfa/Six2/Sox8/Tfap2b/Eya1/Gsta3/Epha4/Kif26b/Notch1/Jag1/Bmp2/Wwtr1/Wnt2b/Notch2/Ampd2/Calb1/Epha7/Prom1/Klf15/Ret/Ptpro/Sfrp1/Slit2/Fgfr1/Ednra/Sall1/Smad1/Irx3/Bmper/Agt/Kank2/Myo1e/Smad3/Heyl/Wnt6/Lif/Six4/Wnk4/Tmem59l/Wnt4/Dchs1/Spry1/Fgf2/Cer1/Hox…	109	ALL_DEGs
GO:0060348	bone development	'155/7948'	232/19294	0.668103	1.62184	7.97528	2.17595e-15	4.31858e-13	2.79938e-13	Axin2/Rpl13/Col6a1/Col1a1/Tulp3/Nab1/Glg1/Large1/Ccn4/Por/Mef2c/Actn3/Ihh/Sulf2/Scube2/Optc/Trpv4/Stc1/Lrrk1/Setdb1/Pls3/Sulf1/Rarb/Sparc/Epyc/Timp3/Igf1/Map2k6/Rflnb/Tmem107/Ctc1/Fbln5/Gli3/Tfap2a/Ogn/Sema4d/Msx2/Bmp4/Tnfsf11/Osr2/Has2/Col2a1/Rgn/Poc1a/Lox/Lipa/Tjp2/Papss2/Ltbp3/Ifitm5/Fam20c/Pdgfa/Col3a1/Col9a1/Nppc/Cfh/Ptprc/Ddr2/Tnn/Miga2/Ext2/Fbn1/Bmp2/Shox2/Notch2/Pdgfc/Pitx2/Thbs3/Ecm1/Mmp…	155	ALL_DEGs
GO:0050678	regulation of epithelial cell proliferation	'244/7948'	407/19294	0.599509	1.45532	7.77041	1.0662e-14	2.05196e-12	1.33012e-12	Ngfr/Ccnd2/Cdh1/Pparg/Acvrl1/Serpinf1/Uhrf1/Hpn/Efnb2/Col18a1/Marveld3/Ppard/Tsc2/Tgfb1/Prkd1/Apoe/Stk11/Stat3/Stat5a/Il12b/Bid/Pgf/Hmox1/Celf1/Mef2c/Htra1/Tek/Cyba/Ihh/Sulf2/Cav1/Twist2/Fut1/Nfib/Tbx1/Hyal1/Wnt2/Aldh1a2/Gata2/Gata3/Lama5/Sulf1/Plcg1/Birc5/Stk4/Adora2b/Sparc/Mydgf/Fmc1/Esr1/Arg1/Igf1/Sirt1/Egfr/Frs2/Flt4/Ccl11/Itgb3/Esr2/Zfp36l1/S2bpcox16/Tgfb3/Ptch1/Ctsl/Aggf1/Thbs4/Fgf10/Bmp4/F…	244	ALL_DEGs
GO:0098742	cell-cell adhesion via plasma-membrane adhesion molecules	'141/7948'	209/19294	0.674641	1.63771	7.75815	1.1906e-14	2.22398e-12	1.44163e-12	Cdh1/Cdh4/Itga5/Lgals9/Itga3/Klf4/Nectin4/Pcdha10/Fgfrl1/Clstn3/Cdh23/Celsr1/Tenm1/Mypn/Nrcam/Pecam1/Emb/Ajuba/Cdh10/Cldn1/Il1rap/Alcam/Nectin3/Igsf11/Cxadr/Robo1/Celsr3/Nrxn1/Cdh2/Dsc2/Pcdh12/Myot/Cd6/Cdh9/Cdh7/Kifap3/Il1rn/Itga4/Bmp2/Vcam1/Cdh17/Ptprd/Dab1/Sparcl1/Ret/Itgal/Gpc4/L1cam/Tenm3/Cdh11/Cx3cl1/Cdh13/Cdh5/Cdh15/Kirrel3/Cadm1/Apoa1/Tgfbr2/Clstn2/Atp2c1/Ptprm/Ptprf/Igsf9b/Mdga2/Pcdh17/Lr…	141	ALL_DEGs
GO:0010631	epithelial cell migration	'200/7948'	321/19294	0.623053	1.51248	7.7494	1.29246e-14	2.34525e-12	1.52024e-12	Itgb2/Alox12/Fap/Pparg/Acvrl1/Serpinf1/Il4/Efnb2/Col18a1/Itga3/Jup/Marveld3/Paxip1/Ppard/Tgfb1/Prkd1/Apoe/Klf4/Stat5a/Gab2/Coro1c/Aqp1/Hdac9/Hspb1/Hmox1/Mef2c/Kit/Tek/Epha2/Fut1/Rab25/Hdac5/Met/Hyal1/Stc1/Gata2/Sash1/Itga2/Gata3/Stard13/Plcg1/Cd40/Mmp9/Pfn1/Adora2b/Sparc/Dcn/Kitl/Igf1/Sirt1/Ptprr/Wdpcp/Flt4/Tns3/Pik3cg/Itgb3/Map3k3/Pecam1/Hif1a/S2bpcox16/Lgmn/Evl/Gpld1/Plk2/Fgf10/Bmp4/Capn7/Wnt5a…	200	ALL_DEGs
GO:1901888	regulation of cell junction assembly	'160/7948'	246/19294	0.650407	1.57888	7.64785	2.83992e-14	5.0101e-12	3.24764e-12	Acvrl1/Adgre5/Dusp3/Efnb3/Coro1c/Mef2c/Ephb3/Tek/Epha2/Cav1/Clstn3/Elavl2/Ace2/Sdc4/Myo1c/Tbx5/Wdpcp/Ace/Asic2/Dlg4/Ntn1/Prkch/Sema4d/Dlg5/Vcl/Wnt5a/Dmtn/Enpp2/Cldn1/Il1rap/Apod/Ptk2/Snai2/Robo1/App/Thbs2/Vegfa/Nrxn1/Nedd4l/Cbln2/Dkk1/Ptprj/St8sia2/Nrp1/Snca/Stau2/Rab17/Epb41l5/Abl1/Grin1/Tlr2/Sema4a/Ntrk1/Pdlim5/Epha7/Ptprd/Rps6/Wnt7a/Tjp1/Gpc4/Srpx2/Gpm6b/Arhgap6/Dlc1/Slit2/Vps35/Irx3/Vstm5/Agt…	160	ALL_DEGs
GO:0006936	muscle contraction	'198/7948'	319/19294	0.62069	1.50674	7.63834	3.02359e-14	5.18996e-12	3.36423e-12	Tbx2/Rem1/Lck/Calm1/Jup/Prkd1/Large1/Irag1/Kit/Actn3/Sulf2/Atp1a2/Casq1/Homer1/Cav1/Tcap/Met/Kcnq1/Psen2/Trpv4/Stc1/Ace2/Itga2/Ncf1/Cacna1d/Sulf1/Tnnc2/Stac2/Adora2b/Tbx3/Scn1b/Calm3/Ccn2/Mybpc1/Sgcd/Smtn/Map2k6/Fkbp1b/P2rx1/Myh3/Tshz3/Ryr2/Edn1/Drd1/Ndufs6/Pde4d/Gata4/Atp8a2/Ednrb/Nup155/Gdnf/Mylk/Sod1/Nr4a1/Myom1/Ehd3/Cacna1h/Dsc2/Nedd4l/Htr7/Gaa/Chrnd/Chrng/Rgs2/Tnnt2/Tnni1/Atp2b4/Atp1b1/Gsn/C…	198	ALL_DEGs
GO:0090132	epithelium migration	'200/7948'	323/19294	0.619195	1.50311	7.63185	3.17213e-14	5.28512e-12	3.42592e-12	Itgb2/Alox12/Fap/Pparg/Acvrl1/Serpinf1/Il4/Efnb2/Col18a1/Itga3/Jup/Marveld3/Paxip1/Ppard/Tgfb1/Prkd1/Apoe/Klf4/Stat5a/Gab2/Coro1c/Aqp1/Hdac9/Hspb1/Hmox1/Mef2c/Kit/Tek/Epha2/Fut1/Rab25/Hdac5/Met/Hyal1/Stc1/Gata2/Sash1/Itga2/Gata3/Stard13/Plcg1/Cd40/Mmp9/Pfn1/Adora2b/Sparc/Dcn/Kitl/Igf1/Sirt1/Ptprr/Wdpcp/Flt4/Tns3/Pik3cg/Itgb3/Map3k3/Pecam1/Hif1a/S2bpcox16/Lgmn/Evl/Gpld1/Plk2/Fgf10/Bmp4/Capn7/Wnt5a…	200	ALL_DEGs
GO:0090130	tissue migration	'201/7948'	325/19294	0.618462	1.50133	7.62875	3.24547e-14	5.28512e-12	3.42592e-12	Itgb2/Alox12/Fap/Pparg/Acvrl1/Serpinf1/Il4/Efnb2/Col18a1/Itga3/Jup/Marveld3/Paxip1/Ppard/Tgfb1/Prkd1/Apoe/Klf4/Stat5a/Gab2/Coro1c/Aqp1/Hdac9/Hspb1/Hmox1/Mef2c/Kit/Tek/Epha2/Fut1/Rab25/Hdac5/Met/Hyal1/Stc1/Gata2/Sash1/Itga2/Gata3/Stard13/Plcg1/Cd40/Mmp9/Pfn1/Adora2b/Sparc/Dcn/Kitl/Igf1/Sirt1/Ptprr/Wdpcp/Flt4/Tns3/Pik3cg/Itgb3/Map3k3/Pecam1/Hif1a/S2bpcox16/Lgmn/Evl/Gpld1/Plk2/Fgf10/Bmp4/Capn7/Wnt5a…	201	ALL_DEGs
GO:0006935	chemotaxis	'254/7948'	430/19294	0.590698	1.43394	7.61641	3.41367e-14	5.42005e-12	3.51339e-12	Wnt3/Itgb2/Sema4f/Il4/Lgals9/Sema6b/Efnb2/Il16/Spi1/Tsc2/Tgfb1/Prkd1/Dusp3/Akt2/Myo9b/Pgf/Hspb1/Kit/Epha2/Rarres2/Met/Trpv4/Csf1/Itga2/Lbp/Plgrkt/Elmo2/Mmp9/Crk/Rac3/Lsp1/Ccl9/Dpep1/Sema6a/Pik3cg/Agr2/Ccl11/Itgb3/Hoxb9/Ntn1/Lgmn/Nedd9/Edn1/Sema4d/Syk/Cxcl14/Pde4d/Thbs4/Fgf10/Sema3g/Wnt5a/Tnfsf11/Ednrb/Sema5a/Angpt1/Wnt7b/Enpp2/Nckap1l/Ptk2/Snai2/Cxadr/Robo1/St6gal1/App/Nr4a1/Bsg/Smoc2/Pla2g7/Vegf…	254	ALL_DEGs
GO:0030199	collagen fibril organization	'55/7948'	63/19294	0.873016	2.11927	7.44753	3.67904e-14	5.69893e-12	3.69415e-12	Loxl3/Mmp11/Col6a1/Col18a1/Col1a1/Fkbp10/Plod3/P3h4/Optc/P4ha1/Aebp1/Pxdn/Vipas39/Rb1/Col14a1/Col2a1/Col11a2/Lox/Efemp2/Loxl4/Col5a2/Col3a1/Dpt/Ddr2/Col5a1/Col11a1/Sfrp2/P3h1/Emilin1/Antxr2/Col1a2/Acan/Comp/Loxl1/Adamts7/Crtap/Tnxb/Atp7a/Scx/Loxl2/Colgalt1/Adamts2/Lmx1b/Tgfb2/Zfp469/Col27a1/Foxc2/Adamts12/Adamts14/Mkx/Ext1/Chadl/Col28a1/Serpinh1/Grem1	55	ALL_DEGs
GO:1901342	regulation of vasculature development	'192/7948'	308/19294	0.623377	1.51326	7.59989	4.05897e-14	6.13775e-12	3.97861e-12	Ngfr/Itgb2/Pparg/Acvrl1/Itga5/Hk2/Serpinf1/Ramp2/Jup/Tgfb1/Prkd1/Klf4/Foxj2/Stat3/Aqp1/Pgf/Hspb1/Hmox1/Tek/Epha2/Fut1/Hyal1/Optc/Dll1/Gata2/Sash1/Cybb/Notch4/Stard13/Cd34/Sulf1/Plcg1/Brca1/Cd40/Mmp9/Ptgis/Sparc/E2f2/Mydgf/Sema6a/Dcn/Sirt1/Pik3cg/Ccl11/Itgb3/Hif1a/S2bpcox16/Fbln5/Wars1/Erap1/Aggf1/Plk2/Gata4/Wnt5a/Cnmd/Spry2/Cma1/Sema5a/Rapgef3/Emp2/Adamts1/Runx1/Cela1/Thbs2/Smoc2/Tnfrsf12a/Vegfa/…	192	ALL_DEGs
GO:0002040	sprouting angiogenesis	'97/7948'	132/19294	0.734848	1.78387	7.56338	4.55727e-14	6.73098e-12	4.36315e-12	Ngfr/Itga5/Ramp2/Efnb2/Tgfb1/Klf4/Il12b/Hdac9/Pgf/Hmox1/Tek/Epha2/Fut1/Hdac5/Dll1/Gata2/Stard13/E2f2/Sema6a/Rspo3/E2f7/Flt4/Map3k3/Hif1a/S2bpcox16/Gpld1/Plk2/Bmp4/Sema5a/Angpt1/Hdac7/Robo1/Nr4a1/Vegfa/Anxa1/Alox5/Itgb1/Nrp1/Tnn/Abl1/Notch1/Tspan18/Creb3l1/Dll4/Spred1/Lef1/Naxe/Jak1/Pik3r3/Tgfbr3/Flt1/Ephb4/Adamts9/Tjp1/Cib1/Srpx2/Vegfd/Adgra2/Vegfc/Slit2/Smad1/Pik3r2/Cdh13/Bmper/Ptgs2/Card10/Egr3…	97	ALL_DEGs
GO:0042330	taxis	'254/7948'	432/19294	0.587963	1.4273	7.51771	7.14587e-14	1.03144e-11	6.68601e-12	Wnt3/Itgb2/Sema4f/Il4/Lgals9/Sema6b/Efnb2/Il16/Spi1/Tsc2/Tgfb1/Prkd1/Dusp3/Akt2/Myo9b/Pgf/Hspb1/Kit/Epha2/Rarres2/Met/Trpv4/Csf1/Itga2/Lbp/Plgrkt/Elmo2/Mmp9/Crk/Rac3/Lsp1/Ccl9/Dpep1/Sema6a/Pik3cg/Agr2/Ccl11/Itgb3/Hoxb9/Ntn1/Lgmn/Nedd9/Edn1/Sema4d/Syk/Cxcl14/Pde4d/Thbs4/Fgf10/Sema3g/Wnt5a/Tnfsf11/Ednrb/Sema5a/Angpt1/Wnt7b/Enpp2/Nckap1l/Ptk2/Snai2/Cxadr/Robo1/St6gal1/App/Nr4a1/Bsg/Smoc2/Pla2g7/Vegf…	254	ALL_DEGs
GO:0007416	synapse assembly	'150/7948'	229/19294	0.655022	1.59008	7.51832	7.5679e-14	1.06808e-11	6.92352e-12	Cdh1/Gabra2/Efnb2/Adgre5/Efnb3/Large1/Mef2c/Ephb3/Gabrb2/Clstn3/Elavl2/Gabra1/Zdhhc12/Crk/Mapt/Gria1/Asic2/Dlg4/Ntn1/Akap5/Sema4d/Dlg5/Wnt5a/Nptxr/Il1rap/Ptk2/Robo1/App/Ache/Thbs2/Nrxn1/Cdh2/Cbln2/Dkk1/Cdh9/Nptx1/Arhgef9/St8sia2/Snca/Stau2/Rab17/Grin1/Caprin1/Tlr2/Sema4a/Ntrk1/Pdlim5/Epha7/Ptprd/Gabra4/Add2/Wnt7a/Plxnd1/Kcnj8/Gpc4/Fgf13/Srpx2/Gabra3/Gpm6a/Slit2/Vps35/Vstm5/Gnpat/Kirrel3/Cadm1/Cls…	150	ALL_DEGs
GO:0010810	regulation of cell-substrate adhesion	'149/7948'	228/19294	0.653509	1.58641	7.455	1.21638e-13	1.6794e-11	1.08862e-11	Egfl6/Myf5/Acvrl1/Itga5/Col1a1/Itga3/Jup/Cd36/Dusp3/Ddr1/Col26a1/Coro1c/Nid1/Fbln1/Tek/Fut1/Csf1/Sdc4/Crk/Rac3/Stk4/Wdpcp/Agr2/Itgb3/Smoc1/Atxn3/Carmil1/Gcnt2/Nedd9/Vcl/Olfm4/Dmtn/Dab2/Has2/Enpp2/Emp2/Bcl6/Apod/Ptk2/Ccdc80/Meltf/St6gal1/Smoc2/Vegfa/Vit/Lims2/Spry4/Pcsk5/Jak2/Efemp2/P4hb/Ptprj/Itgb1/Nrp1/Fn1/Epb41l5/Abl1/Notch1/Itga6/Mdk/Jag1/Fermt1/Postn/Npy2r/Ccn1/Pdpn/Prkcz/Emilin1/Spp1/Npy/Ptn…	149	ALL_DEGs
GO:0048771	tissue remodeling	'136/7948'	204/19294	0.666667	1.61835	7.43115	1.44301e-13	1.94991e-11	1.26397e-11	Klf6/Pparg/Acvrl1/Col6a1/Timp1/Axl/Elf3/Stat5a/Mef2c/Tmbim1/Epha2/Ihh/P3h4/Cav1/Tbx1/Gnat2/Bcr/Lrrk1/Mmp9/Rab3d/Ahr/Pdk4/Rspo3/Il20ra/Igf1/Egfr/Flt4/Tns3/Itgb3/Nos2/Hif1a/Gpr137b/Syk/Thbs4/Fgf10/Gata4/Tnfsf11/Npr3/Vdr/Tfrc/Cela1/Vegfa/Epas1/Csf1r/Syt7/Lipa/Ltbp3/Capn1/Igfbp5/Nppc/Inpp5d/Tnfrsf11a/Ddr2/Itga4/Traf6/Mdk/Jag1/Dll4/Rassf2/Cst3/Car2/Notch2/Ctsk/Sema3c/Ncdn/Abcb1b/Nos3/Cd38/Fosl2/Tgfbr3…	136	ALL_DEGs
GO:0048705	skeletal system morphogenesis	'164/7948'	257/19294	0.638132	1.54908	7.41676	1.61529e-13	2.13724e-11	1.3854e-11	Tbx4/Wnt9a/Axin2/Fgf6/Myf5/Col1a1/Tulp3/Hoxc11/Nab1/Glg1/Por/Mef2c/Actn3/Ihh/Scube2/Twist2/Bmp7/Tbx1/Hyal1/Trpv4/Alx3/Stc1/Lama5/Rarb/Arid5b/Ccn2/Sgpl1/Rflnb/Hoxb9/Tmem107/Gsc/Tgfb3/Gli3/Tfap2a/Ror2/Msx2/Bmp4/Osr2/Myc/Has2/Vdr/Col2a1/Poc1a/Dlx2/Vegfa/Six2/Ift140/Zeb1/Col11a2/Pdgfrb/Ltbp3/Ifitm5/Rdh10/Eya1/Col3a1/Col9a1/Nppc/Prrx1/Bmi1/Hoxd8/Ext2/Otor/Schip1/Shox2/Tbx15/Col11a1/Thbs3/Mmp16/Hspg2/A…	164	ALL_DEGs
GO:0055074	calcium ion homeostasis	'204/7948'	336/19294	0.607143	1.47386	7.33378	2.8916e-13	3.74787e-11	2.42944e-11	Lck/Calm1/Bcap31/Tgfb1/Prkd1/Apoe/Gstm7/Ptpn6/Cyba/Atp7b/Hap1/Casq1/Cav1/Psen2/Plcd1/Cdh23/Trpv4/Stc1/Xk/Plcg1/Cacnb4/Cd40/Jph2/Fis1/Calm3/Stc2/Sgcd/Fam20a/Fkbp1b/Itgb3/P2rx1/Atp2a3/Pacs2/Ryr2/Edn1/Drd1/Hexb/Pde4d/Ero1a/Wnt5a/Tnfsf11/Ank/Adcy8/Smdt1/Vdr/App/Rgn/Slc25a27/Lhcgr/Tmem178/Diaph1/Plcb3/Gsto1/Ddit3/Ccr1/Snca/Nppc/Gpr39/Dbi/Ptprc/Atp2b4/Atp1b1/Abl1/Grin1/Edn3/Trpc3/P2ry1/Ngf/Casq2/Sypl2/…	204	ALL_DEGs
GO:0010632	regulation of epithelial cell migration	'156/7948'	243/19294	0.641975	1.55841	7.33175	3.0255e-13	3.84299e-11	2.4911e-11	Alox12/Pparg/Acvrl1/Serpinf1/Il4/Col18a1/Itga3/Jup/Marveld3/Tgfb1/Prkd1/Apoe/Klf4/Stat5a/Gab2/Coro1c/Aqp1/Hdac9/Hspb1/Hmox1/Mef2c/Tek/Epha2/Fut1/Rab25/Hdac5/Met/Hyal1/Stc1/Gata2/Sash1/Itga2/Gata3/Stard13/Plcg1/Cd40/Mmp9/Pfn1/Adora2b/Sparc/Dcn/Igf1/Sirt1/Ptprr/Flt4/Pik3cg/Itgb3/Map3k3/Hif1a/S2bpcox16/Lgmn/Evl/Gpld1/Plk2/Fgf10/Bmp4/Capn7/Wnt5a/Sema5a/Angpt1/Has2/Enpp2/Sh3bp1/Hdac7/Emp2/Ptk2/Snai2/B…	156	ALL_DEGs
GO:0042391	regulation of membrane potential	'279/7948'	487/19294	0.572895	1.39072	7.30933	3.21613e-13	3.97667e-11	2.57775e-11	Ngfr/Nalcn/Alox12/Gabra2/Sez6/Col6a1/Calm1/Jup/Grik3/Gria3/Tmem25/Grin2d/Cd36/Cacnb3/Grik5/Crtc1/Bid/Mef2c/Clic1/Atp1a2/Gabrb2/Cav1/Bcl2l1/Dynll1/Met/Kcnq1/Gabra1/Piezo1/Cacna1d/Mpp2/Cacnb4/Pmp22/Tbx5/Mapt/Scn1b/Calm3/Dcn/Adora2a/Rack1/Gria1/Nrcam/Fkbp1b/Asic2/P2rx1/Slc6a4/Dlg4/Ryr2/Edn1/Drd1/Glrx/Plk2/Rgs7bp/Hcn1/Ndufs4/Nup155/Myc/Fgf12/Mapk8ip2/P2rx6/Igsf11/Cxadr/App/Grik1/Sod1/Slc4a8/Fhl1/Kcnk…	279	ALL_DEGs
GO:0045765	regulation of angiogenesis	'186/7948'	301/19294	0.61794	1.50007	7.31851	3.27927e-13	3.97667e-11	2.57775e-11	Ngfr/Itgb2/Pparg/Acvrl1/Itga5/Hk2/Serpinf1/Ramp2/Jup/Prkd1/Klf4/Foxj2/Stat3/Aqp1/Pgf/Hspb1/Hmox1/Tek/Epha2/Fut1/Hyal1/Optc/Dll1/Gata2/Sash1/Cybb/Notch4/Stard13/Cd34/Sulf1/Plcg1/Brca1/Cd40/Mmp9/Ptgis/Sparc/E2f2/Mydgf/Sema6a/Dcn/Sirt1/Pik3cg/Ccl11/Itgb3/Hif1a/S2bpcox16/Fbln5/Wars1/Erap1/Aggf1/Plk2/Gata4/Wnt5a/Cnmd/Spry2/Cma1/Sema5a/Rapgef3/Emp2/Adamts1/Runx1/Cela1/Thbs2/Smoc2/Tnfrsf12a/Vegfa/Emilin…	186	ALL_DEGs
GO:0051962	positive regulation of nervous system development	'226/7948'	380/19294	0.594737	1.44374	7.31201	3.31859e-13	3.97667e-11	2.57775e-11	Wnt3/Cdh4/Pparg/Serpinf1/Bcl11a/Rnd2/Metrn/Ncan/Tgfb1/Adgre5/Apoe/Stk11/Dll3/Crabp2/Bcan/Eif4g2/Kit/Ephb3/Hap1/Fzd3/Clstn3/Met/Wnt2/Etv5/Mapt/Sgk1/Myb/Ascl1/Igf1/Egfr/Jade2/Id2/Ace/Asic2/Dlg4/Ntn1/Gfap/Akap5/Nin/Prkch/Hif1a/Gli3/Id4/Sema4d/Hapln1/Vcan/Il6st/Dlg5/Wnt5a/Nefl/Dct/Sema5a/Myc/Enpp2/Il1rap/Hes1/Ptk2/Clcn2/Chodl/Robo1/Ache/Thbs2/Tnfrsf12a/Vegfa/Man2a1/Nrxn1/Sox8/Csf1r/Cbln2/Il33/Pias2/S…	226	ALL_DEGs
GO:0072009	nephron epithelium development	'85/7948'	114/19294	0.745614	1.81	7.25973	4.27965e-13	5.03335e-11	3.26271e-11	Irx2/Tgfb1/Aqp1/Pgf/Cd44/Mef2c/Klhl3/Dll1/Gata3/Lama5/Gli3/Edn1/Ptch1/Bmp4/Ednrb/Gdnf/Myc/Mtss1/Wnt7b/Hes1/Vegfa/Six2/Sox8/Tfap2b/Eya1/Kif26b/Notch1/Jag1/Bmp2/Wwtr1/Wnt2b/Notch2/Ampd2/Calb1/Prom1/Klf15/Ptpro/Ednra/Sall1/Irx3/Agt/Myo1e/Heyl/Wnt6/Lif/Six4/Wnk4/Tmem59l/Wnt4/Dchs1/Fgf2/Hoxa11/Hoxb7/Timeless/Hey1/Npnt/Hoxd11/Aqp11/Greb1l/Fmn1/Pou3f3/Basp1/Foxc2/Fat4/Cd24a/Hs3st3a1/Hes5/Nog/Agtr1a/Adam…	85	ALL_DEGs
GO:0043583	ear development	'157/7948'	246/19294	0.638211	1.54928	7.25674	5.22195e-13	5.99438e-11	3.88567e-11	Tbx2/Cdh1/Sec24b/Ift20/Hpn/Naglu/Mcm2/Dvl3/Ddr1/Gabrb2/Tcap/Fzd3/Tbx1/Kcnq1/Bcr/Eya4/Cdh23/Dll1/Gata2/Aldh1a3/Gata3/Celsr1/Ift27/Sdc4/Tbx3/Hey2/Lin7a/Igf1/Lgr5/Wdpcp/Nherf1/Ntn1/Tshr/Gsc/Gli3/Tfap2a/Edn1/Ror2/Cxcl14/Fgf10/Bmp4/Fgf9/Atp8a2/Wnt5a/Spry2/Lrp10/Fzd6/Osr2/Myc/Col2a1/Hes1/Sod1/Clic5/Ptk7/Six2/Zeb1/Rdh10/Eya1/Epha4/Vangl2/Prrx1/Itga8/Notch1/Frzb/Jag1/Bmp2/Bcl2l11/Col11a1/Kcnq4/Mycl/Dlx6/…	157	ALL_DEGs
GO:0061326	renal tubule development	'79/7948'	104/19294	0.759615	1.84399	7.22309	5.28555e-13	5.99438e-11	3.88567e-11	Irx2/Tgfb1/Aqp1/Pgf/Cd44/Mef2c/Hdac5/Klhl3/Dll1/Gata3/Lama5/Lgr5/Gli3/Ptch1/Bmp4/Gdnf/Myc/Mtss1/Wnt7b/Hes1/Vegfa/Six2/Sox8/Tfap2b/Eya1/Stat1/Kif26b/Notch1/Jag1/Bmp2/Wwtr1/Wnt2b/Notch2/Calb1/Prom1/Col4a1/Sall1/Irx3/Agt/Heyl/Wnt6/Lif/Six4/Pkd2/Wnk4/Tmem59l/Prickle1/Wnt4/Dchs1/Fgf2/Hoxa11/Hoxb7/Timeless/Hey1/Npnt/Hoxd11/Aqp11/Greb1l/Fmn1/Pou3f3/Fat4/Cd24a/Hs3st3a1/Hes5/Nog/Agtr1a/Adamts16/Lgr4/Six1/…	79	ALL_DEGs
GO:0048762	mesenchymal cell differentiation	'158/7948'	248/19294	0.637097	1.54657	7.25067	5.45439e-13	6.07733e-11	3.93945e-11	Axin2/Sema4f/Loxl3/Sema6b/Hpn/Col1a1/Tsc2/Tgfb1/Coro1c/Mef2c/Chrd/Bmp7/Tbx1/Wnt2/Aldh1a2/Notch4/Gata3/Lama5/Wnt11/Tbx3/Sema6a/Hey2/Kitl/Timp3/Pofut2/Rflnb/Gsc/Hif1a/Tgfb3/Tfap2a/Gcnt2/Edn1/Sema4d/Msx2/Fgf10/Dlg5/Bmp4/Sema3g/Wnt5a/Spry2/Ednrb/Gdnf/Dab2/Sema5a/Has2/Emp2/Hes1/Ptk2/Snai2/Vegfa/Six2/Sox8/Bambi/Slc39a6/Cdh2/Tcof1/Tcf7l2/Cyp26a1/Sema4g/Nrp1/Rdh10/Nrp2/Slc39a10/Sema4c/Wnt10a/Fn1/Epha4/Ep…	158	ALL_DEGs
GO:0003018	vascular process in circulatory system	'156/7948'	246/19294	0.634146	1.53941	7.12637	1.33075e-12	1.45718e-10	9.4457e-11	Kat2b/Ramp2/Slc1a5/Ppard/Tgfb1/Cd36/Apoe/Plod3/Irag1/Slc5a6/Atp1a2/Cav1/Bcr/Trpv4/Adora2b/Slc22a5/Ahr/Sirt1/Egfr/Avpr1a/Adora2a/Ace/Asic2/P2rx1/Slc6a4/Esr2/Hif1a/Edn1/Drd1/Ocln/Hmgcr/Ednrb/Npr3/Angpt1/Ptk2/Sod1/Vegfa/Adcyap1/Nr3c1/Htr7/Tjp2/Capn1/Add3/Ptprj/Alox5/Itgb1/Nppc/Rgs2/Abl1/Zeb2/Itga4/Ext2/Snta1/Edn3/P2ry1/Gclm/Ddah1/Svep1/Sh3gl2/Edn2/Slc2a1/Mfsd2a/Abcb1b/Nos3/Cd38/Tgfbr3/Abcg3/P2rx4/Ab…	156	ALL_DEGs
GO:0042063	gliogenesis	'227/7948'	386/19294	0.588083	1.42759	7.10238	1.47991e-12	1.59304e-10	1.03264e-10	Pparg/Col6a1/Naglu/Metrn/Ncan/Tgfb1/Nab1/Lamb1/Dll3/Stat3/Akt2/Large1/Bcan/Ndrg1/Zmiz1/Nfib/Ascl2/Etv5/Csf1/Dll1/B4galt5/Erbb3/Pmp22/Myb/Ifngr1/Ascl1/Igf1/Egfr/Ptprb/Adora2a/Efemp1/Id2/Itgb4/Ntn1/Gfap/Prkch/Gli3/Id4/Ror2/Drd1/Tppp/Hapln1/Vcan/Hexb/Fgf10/Il6st/Bmp4/Clu/Rb1/Matn2/Myc/Enpp2/Hes1/Ptk2/Clcn2/App/Sod1/Dhh/Dlx2/Tnfrsf21/Trem2/Sox8/Adcyap1/Cdh2/Nr3c1/Mbd1/Csf1r/Fas/Il33/Tcf7l2/Pitx3/Ptpr…	227	ALL_DEGs
GO:0060537	muscle tissue development	'278/7948'	490/19294	0.567347	1.37725	7.07964	1.65049e-12	1.74704e-10	1.13247e-10	Tbx2/Ccnd2/Myf5/Ift20/Col6a1/Efnb2/Naglu/Srpk3/Tgfb1/Hlf/Large1/Hdac9/Ccn4/Klf5/Mef2c/Epor/Actn3/Ihh/Usp19/Homer1/Cav1/Tcap/Fhl2/Rbfox1/Hdac5/Bmp7/Tbx1/Met/Myod1/Wnt2/Aldh1a2/Dll1/Xk/Rarb/Jph2/Eya2/Erbb3/Pmp22/Tbx5/Kdm6b/Tbx3/Hey2/Plagl1/Cdk1/Igf1/Sirt1/Meis1/Frs2/Csrp2/Hmg20b/Sgcd/Id2/Tshz3/Fos/Meg3/Ryr2/Edn1/Pitx1/Hmgcr/Nln/Nr1d2/Bmp4/Gata4/Fgf9/Wnt5a/Rb1/Zfpm2/Angpt1/Myc/Col14a1/Hdac7/Boc/Tomm…	278	ALL_DEGs
GO:0050767	regulation of neurogenesis	'273/7948'	480/19294	0.56875	1.38066	7.0684	1.79404e-12	1.85561e-10	1.20284e-10	Wnt3/Lhx2/Cdh1/Cdh4/Pparg/Sema4f/Serpinf1/Bcl11a/Sema6b/Rnd2/Metrn/Ncan/Tsc2/Tgfb1/Apoe/Stk11/Dll3/Efnb3/Ulk2/Crabp2/Bcan/Eif4g2/Kit/Hap1/Fzd3/Bmp7/Ascl2/Met/Wnt2/Etv5/Dll1/Gata2/Map2/Tnr/Mapt/Sema6a/Hey2/Sgk1/Myb/Ascl1/Igf1/Egfr/Appl2/Jade2/Id2/Ccl11/Ace/Dlg4/Ntn1/Gfap/Akap5/Nin/Prkch/Hif1a/Gli3/Id4/Sema4d/Hapln1/Vcan/Il6st/Bmp4/Sema3g/Wnt5a/Nefl/Rb1/Dct/Sema5a/Myc/Wnt7b/Enpp2/Hes1/Ptk2/Clcn2/Ch…	273	ALL_DEGs
GO:0090257	regulation of muscle system process	'165/7948'	264/19294	0.625	1.51721	7.08196	1.81149e-12	1.85561e-10	1.20284e-10	Rem1/Lck/Pparg/Calm1/Jup/Prkd1/Klf4/Ccn4/Mef2c/Irag1/Kit/Actn3/Atp1a2/Casq1/Cav1/Mymk/Kcnq1/Trpv4/Stc1/Ace2/Itga2/Ncf1/Tnnc2/Akap1/Adora2b/Calm3/Ccn2/Igf1/Sirt1/Smtn/Fkbp1b/P2rx1/Ryr2/Edn1/Pde4d/Ndufs4/Camk2g/Gata4/Fbxo32/Srl/Ptk2/Tomm70a/Sod1/Nr4a1/Gtf2ird1/Pi16/Ehd3/Cacna1h/Dsc2/Aif1/Nr3c1/Htr7/Oga/Mstn/Igfbp5/Nppc/Rgs2/Tnnt2/Tnni1/Myog/Atp2b4/Parp1/Atp1b1/Gsn/Notch1/Trpc3/Casq2/Npy2r/Lmna/Tacr…	165	ALL_DEGs
GO:0033002	muscle cell proliferation	'167/7948'	268/19294	0.623134	1.51268	7.07367	1.91745e-12	1.93298e-10	1.25299e-10	Tbx2/Gna12/Ccnd2/Alox12/Pparg/Cnn1/Akr1b1/Ppard/Tgfb1/Apoe/Klf4/Foxj2/Stat3/Dnmt1/Il12b/Ccn4/Hmox1/Igf1r/Mef2c/Cyba/Cav1/Tbx1/Wnt2/Vipr2/Ace2/Itga2/Mmp9/Tbx5/Esr1/Hey2/Cdk1/Myb/Timp3/Igf1/Sirt1/Egfr/Frs2/Igfbp3/Id2/Itgb3/Ern1/Stat5b/Esr2/Mnat1/Hif1a/Tgfb3/Edn1/Ogn/Hmgcr/Pde4d/Bmp4/Gata4/Fgf9/Npr3/Zfpm2/Angpt1/Myc/Apod/Ptk2/Cxadr/Adamts1/Kpna1/Cdkn1a/Vegfa/Pim1/Ndc80/Aif1/Hbegf/Megf10/Pdgfrb/Jak2/…	167	ALL_DEGs
GO:0030326	embryonic limb morphogenesis	'100/7948'	143/19294	0.699301	1.69757	7.0076	2.99283e-12	2.92422e-10	1.89554e-10	Tbx2/Tbx4/Wnt3/Wnt9a/Gna12/Hoxa10/Tulp3/Hoxc11/Hoxd13/Hoxd12/Map3k20/Crabp2/Ihh/Bmp7/Psen2/Aldh1a2/Alx3/Rarb/Tbx5/Tbx3/Wdpcp/Tmem107/Gli3/Tfap2a/Ror2/Ptch1/Msx2/Pitx1/Bmp4/Fgf9/Wnt5a/Fzd6/Osr2/Hoxc10/Trp63/Ift140/Dkk1/Rdh10/Prrx1/Notch1/Bcl2l11/Sall4/Mecom/Mbnl1/Shox2/Notch2/Lef1/Sfrp2/Pitx2/Dlx6/Dlx5/Wnt7a/Fgfr1/Sall1/Smarca4/Rpgrip1l/Traf3ip1/Chst11/Pbx2/Fras1/Twist1/Prickle1/Alx1/Frem2/Aff3/My…	100	ALL_DEGs
GO:0035113	embryonic appendage morphogenesis	'100/7948'	143/19294	0.699301	1.69757	7.0076	2.99283e-12	2.92422e-10	1.89554e-10	Tbx2/Tbx4/Wnt3/Wnt9a/Gna12/Hoxa10/Tulp3/Hoxc11/Hoxd13/Hoxd12/Map3k20/Crabp2/Ihh/Bmp7/Psen2/Aldh1a2/Alx3/Rarb/Tbx5/Tbx3/Wdpcp/Tmem107/Gli3/Tfap2a/Ror2/Ptch1/Msx2/Pitx1/Bmp4/Fgf9/Wnt5a/Fzd6/Osr2/Hoxc10/Trp63/Ift140/Dkk1/Rdh10/Prrx1/Notch1/Bcl2l11/Sall4/Mecom/Mbnl1/Shox2/Notch2/Lef1/Sfrp2/Pitx2/Dlx6/Dlx5/Wnt7a/Fgfr1/Sall1/Smarca4/Rpgrip1l/Traf3ip1/Chst11/Pbx2/Fras1/Twist1/Prickle1/Alx1/Frem2/Aff3/My…	100	ALL_DEGs
GO:0006941	striated muscle contraction	'118/7948'	176/19294	0.670455	1.62755	6.99986	3.26037e-12	3.13737e-10	2.0337e-10	Rem1/Calm1/Jup/Prkd1/Large1/Actn3/Atp1a2/Casq1/Homer1/Cav1/Tcap/Met/Kcnq1/Psen2/Trpv4/Stc1/Ace2/Cacna1d/Tnnc2/Stac2/Scn1b/Calm3/Ccn2/Sgcd/Smtn/Map2k6/Fkbp1b/Myh3/Ryr2/Pde4d/Gata4/Atp8a2/Nup155/Nr4a1/Ehd3/Cacna1h/Dsc2/Nedd4l/Gaa/Chrnd/Chrng/Rgs2/Tnnt2/Tnni1/Atp1b1/Gsn/Chrna1/Snta1/Casq2/Pde4b/Slc9a1/Atp2a2/P2rx4/Kcnj8/Abcc9/Dmpk/Csrp3/Synm/Ryr1/Aldoa/Atp2a1/Myh14/Tnni2/Fgf13/Flna/Hcn4/Tpm1/Ank2/Ra…	118	ALL_DEGs
GO:0040013	negative regulation of locomotion	'210/7948'	355/19294	0.591549	1.436	6.93957	4.67327e-12	4.42985e-10	2.87151e-10	Ngfr/Wnt3/Gna12/Cdh1/Pparg/Acvrl1/Adora3/Sema4f/Serpinf1/Il4/Timp1/Sema6b/Jup/Marveld3/Ppard/Tgfb1/Apoe/Klf4/Dusp3/Stat3/Coro1c/Cnn2/Il27ra/Mef2c/Fbln1/Chrd/Cav1/Hdac5/Bcr/Gm266/Brms1l/Stc1/Gata3/Wnt11/Stard13/Sulf1/Crk/Tbx5/Dpep1/Sema6a/Dcn/Srgap1/Ptprr/Nav3/Adarb1/Igfbp3/Sap30l/Nherf1/Cygb/S2bpcox16/Evl/Nedd9/Sema4d/Drd1/Mctp1/Dlg5/Sema3g/Wnt5a/Sema5a/Apod/Ptk2/Gcsam/Cd200/Robo1/St6gal1/Rgn/Emi…	210	ALL_DEGs
GO:0050900	leukocyte migration	'220/7948'	376/19294	0.585106	1.42036	6.8895	6.51581e-12	6.08558e-10	3.94479e-10	Itgb2/Adora3/Aire/Il4/Lgals9/Itga3/Il16/Spi1/Tgfb1/Cnn2/Myo9b/Pgf/Il27ra/Kit/Ascl2/Rarres2/Bcr/Mcoln2/Trpv4/Csf1/Itga2/Gata3/Eps8/Lbp/Cd34/Mmp9/Crk/Rac3/Ccl9/Dpep1/Aoc3/Kitl/Stk10/Madcam1/Ccl11/Itgb3/Pecam1/Stat5b/Lgmn/Nedd9/Edn1/Syk/Ror2/Cxcl14/Pde4d/Thbs4/Wnt5a/Tnfsf11/Ednrb/Golph3/Nckap1l/Emp2/Apod/Ptk2/Gcsam/Cd200/Cxadr/App/Bsg/Pla2g7/Vegfa/Trem2/Dusp1/Aif1/Il17b/Slc12a2/Cd74/Csf1r/Anxa1/Il33…	220	ALL_DEGs
GO:0060560	developmental growth involved in morphogenesis	'173/7948'	283/19294	0.611307	1.48397	6.86457	8.11773e-12	7.47184e-10	4.84339e-10	Tbx2/Wnt3/Lhx2/Cdh1/Cdh4/Sema4f/Bcl11a/Sema6b/Rnd2/Hoxd13/Tgfb1/Apoe/Stk11/Ddr1/Ulk2/Crabp2/Bcan/Eif4g2/Clstn3/Csf1/Map2/Tnr/Wnt11/Mapt/Sfrp5/Ahr/Sema6a/Esr1/Wasf1/Cobl/Llph/Cyfip2/Jade2/Ccl11/Ntn1/Nin/Edn1/Sema4d/Fgf10/Vcl/Bmp4/Sema3g/Wnt5a/Spry2/Cpne6/Sema5a/Wnt7b/Robo1/App/Tnfrsf12a/Vegfa/Ptk7/Cpne5/Impact/Nedd4l/Slc12a2/Csf1r/Slit1/Sema4g/St8sia2/Itgb1/Nrp1/Rdh10/Nrp2/Sema4c/Fn1/Epb41l5/Syt2/…	173	ALL_DEGs
GO:0072080	nephron tubule development	'73/7948'	97/19294	0.752577	1.8269	6.83331	8.88529e-12	8.06149e-10	5.22562e-10	Irx2/Tgfb1/Aqp1/Pgf/Cd44/Mef2c/Klhl3/Dll1/Gata3/Lama5/Gli3/Ptch1/Bmp4/Gdnf/Myc/Mtss1/Wnt7b/Hes1/Vegfa/Six2/Sox8/Tfap2b/Eya1/Kif26b/Notch1/Jag1/Bmp2/Wwtr1/Wnt2b/Notch2/Calb1/Prom1/Sall1/Irx3/Agt/Heyl/Wnt6/Lif/Six4/Wnk4/Tmem59l/Wnt4/Dchs1/Fgf2/Hoxa11/Hoxb7/Timeless/Hey1/Npnt/Hoxd11/Aqp11/Greb1l/Fmn1/Pou3f3/Fat4/Cd24a/Hs3st3a1/Hes5/Nog/Agtr1a/Adamts16/Lgr4/Six1/Tacstd2/Pbx1/Commd5/Gpc3/Bcl2/Irx1/Agt…	73	ALL_DEGs
GO:0034762	regulation of transmembrane transport	'279/7948'	498/19294	0.560241	1.36	6.81229	1.03622e-11	9.26903e-10	6.00837e-10	Rem1/Hk2/Il4/Calm1/Tgfb1/Prkd1/Grin2d/Cacnb3/Gstm7/Akt2/Ptpn6/Sh2b2/Slc1a2/Mef2c/Cyba/Hap1/Atp1a2/Casq1/Homer1/Cav1/Met/Kcnq1/Fxyd5/Psen2/Pea15a/Clip3/Ace2/Cacna1d/Plcg1/Stac2/Cacnb4/Mmp9/Jph2/Erbb3/Kcnab3/Acsl1/Scn1b/Ahr/Aoc3/Calm3/Esr1/Fyn/Gopc/Mrln/Arg1/Igf1/Appl2/Pik3cg/Tspan13/Rgs9/Fkbp1b/Ace/Itgb3/Asic2/Cacng4/Nherf1/P2rx1/Akap5/Ryr2/Edn1/Drd1/Dapk1/Ocln/Pde4d/Rasgrf2/Bmp4/Myc/Rapgef3/Shisa…	279	ALL_DEGs
GO:0001649	osteoblast differentiation	'138/7948'	216/19294	0.638889	1.55092	6.81487	1.17337e-11	1.03501e-09	6.70912e-10	Wnt3/Axin2/Pparg/Col1a1/Lrp3/Prkd1/Ccn4/Mef2c/Epha2/Ihh/Chrd/Clic1/Scube2/Twist2/Fhl2/Hdac5/Bmp7/Atraid/Wnt11/Ahr/Gdpd2/Igf1/Igfbp3/Map2k6/Id2/Erh/Smoc1/Gli3/Id4/Sema4d/Ptch1/Msx2/Pdlim7/Il6st/Bmp4/Gdf10/Fgf9/Wnt7b/Hdac7/Trp63/Ptk2/Snai2/Dhh/Noct/Vegfa/Crim1/Sox8/Bambi/Lox/Limd1/Gli1/Ifitm1/Fam20c/Igfbp5/Nppc/Ucma/Ddr2/Tnn/Notch1/Creb3l1/Jag1/Rassf2/Bmp2/Wwtr1/Shox2/Adar/Sfrp2/Lmna/Ccn1/Map3k7/Fo…	138	ALL_DEGs
GO:0016055	Wnt signaling pathway	'250/7948'	440/19294	0.568182	1.37928	6.7358	1.78123e-11	1.54967e-09	1.00453e-09	Wnt3/Wnt9a/Axin2/Cdh1/Tcf7/Ift20/Col6a1/Pfdn5/Col1a1/Itga3/Dlx3/Jup/Ccne1/Tsc2/Tgfb1/Apoe/Hbp1/Klf4/Stk11/Grk5/Dvl3/Cul3/Cd44/Ccn4/Nid1/Sulf2/Cav1/Fzd3/Tle1/Gprc5b/Wnt2/Prdm15/Bicc1/Lrrk1/Wnt11/Celsr1/Sulf1/Rac3/Stk4/Ctdnep1/Sfrp5/Rspo3/Egfr/Apc2/Lgr5/Wif1/Fbxw11/Kremen1/Sdc1/Nherf1/Nxn/Gsc/Gli3/Edn1/Barx1/Spin1/Ror2/Nkd2/Depdc1b/Fgf10/Map3k1/Lats2/Fgf9/Amer2/Wnt5a/Gpc5/Ednrb/Dab2/Sema5a/Ctnnd2/F…	250	ALL_DEGs
GO:0007015	actin filament organization	'265/7948'	471/19294	0.562633	1.36581	6.72707	1.85993e-11	1.59627e-09	1.03473e-09	Hip1r/Rnd2/Cnn1/Aif1l/Rhoc/Scin/Cul3/Coro1c/Arhgef18/Cnn2/Tcap/Met/Spire2/Trpv4/Fhod1/Elmo3/Actn1/Eps8/Wnt11/Tenm1/Pls3/Sdc4/Rnd3/Elmo2/Myo1c/Rac3/Pfn1/Shroom1/Myo1b/Gdpd2/Mical1/Wasf1/Ccn2/Washc3/Plek/Cobl/Cyfip2/Pdlim4/Cyria/Ccl11/Pecam1/Rflnb/Sptb/Tgfb3/Evl/Carmil1/Cap2/Iqgap2/Map3k1/Gpr65/Lcp1/Rhobtb2/Dmtn/Carmil3/Sema5a/Washc5/Mtss1/Sh3bp1/Rapgef3/Nckap1l/Emp2/Tagln3/Itgb5/Lima1/Arhgap28/Rho…	265	ALL_DEGs
GO:0006874	intracellular calcium ion homeostasis	'186/7948'	311/19294	0.598071	1.45183	6.72333	2.0753e-11	1.75737e-09	1.13916e-09	Lck/Calm1/Bcap31/Tgfb1/Prkd1/Apoe/Gstm7/Ptpn6/Cyba/Atp7b/Hap1/Casq1/Cav1/Psen2/Plcd1/Cdh23/Trpv4/Stc1/Xk/Plcg1/Cacnb4/Cd40/Jph2/Fis1/Calm3/Stc2/Fkbp1b/Itgb3/P2rx1/Atp2a3/Pacs2/Ryr2/Edn1/Drd1/Hexb/Pde4d/Ero1a/Wnt5a/Adcy8/Smdt1/Vdr/App/Rgn/Slc25a27/Lhcgr/Tmem178/Diaph1/Plcb3/Gsto1/Ddit3/Ccr1/Snca/Nppc/Gpr39/Dbi/Ptprc/Atp2b4/Atp1b1/Abl1/Grin1/Edn3/Trpc3/P2ry1/Ngf/Casq2/Sypl2/Mcub/Asph/Calb1/Edn2/Mfn…	186	ALL_DEGs
GO:0043542	endothelial cell migration	'143/7948'	227/19294	0.629956	1.52924	6.71319	2.32201e-11	1.94041e-09	1.25781e-09	Itgb2/Alox12/Fap/Pparg/Acvrl1/Serpinf1/Efnb2/Col18a1/Jup/Paxip1/Tgfb1/Prkd1/Apoe/Klf4/Stat5a/Hdac9/Hspb1/Hmox1/Mef2c/Tek/Epha2/Fut1/Hdac5/Met/Stc1/Gata2/Sash1/Gata3/Stard13/Plcg1/Cd40/Adora2b/Sparc/Dcn/Igf1/Sirt1/Flt4/Tns3/Pik3cg/Itgb3/Map3k3/Pecam1/Hif1a/S2bpcox16/Lgmn/Gpld1/Plk2/Bmp4/Wnt5a/Sema5a/Angpt1/Sh3bp1/Hdac7/Emp2/Ptk2/Snai2/Robo1/Nr4a1/Bsg/Smoc2/Vegfa/Anxa1/Lpxn/Itgb1/Nrp1/Atp2b4/Abl1/Z…	143	ALL_DEGs
GO:0060047	heart contraction	'147/7948'	235/19294	0.625532	1.5185	6.69326	2.64324e-11	2.18016e-09	1.41322e-09	Calm1/Jup/Cacna1e/Atp1a2/Cav1/Tcap/Met/Kcnq1/Psen2/Stc1/Ace2/Cacna1d/Tbx5/Scn1b/Calm3/Hey2/Ccn2/Sirt1/Avpr1a/Sgcd/Smtn/Map2k6/Fkbp1b/Ace/Ryr2/Edn1/Pde4d/Thrb/Gata4/Ednrb/Nup155/Cxadr/Atp5pf/Sod1/Rps6ka2/Ehd3/Cacna1h/Epas1/Dsc2/Hbegf/Nedd4l/Slc1a1/Gaa/Rgs2/Tnnt2/Tnni1/Atp2b4/Atp1b1/Gsn/Ext2/Snta1/Edn3/Shox2/Casq2/Tacr3/Pde4b/Edn2/Slc9a1/Sema3a/Nos3/Nmu/Atp2a2/P2rx4/Kcnj8/Abcc9/Dmpk/Csrp3/Chrna7/Me…	147	ALL_DEGs
GO:0048562	embryonic organ morphogenesis	'189/7948'	318/19294	0.59434	1.44278	6.66351	3.07673e-11	2.49585e-09	1.61786e-09	Tbx2/Wnt9a/Myf5/Tcf7/Sec24b/Hpn/Tulp3/Hoxc11/Naglu/Dvl3/Mef2c/Epha2/Ihh/Twist2/Tcap/Fzd3/Bmp7/Tbx1/Kcnq1/Bcr/Hyal1/Eya4/Cdh23/Aldh1a2/Alx3/Dll1/Gata2/Aldh1a3/Gata3/Wnt11/Celsr1/Rarb/Tbx3/Frs2/Wdpcp/Id2/Nherf1/Hoxb9/Ntn1/Tshr/Gsc/Hif1a/Tgfb3/Ryr2/Gli3/Tfap2a/Edn1/Ror2/Fgf10/Bmp4/Gata4/Fgf9/Atp8a2/Wnt5a/Spry2/Fzd6/Osr2/Myc/Col2a1/Hes1/Sod1/Dlx2/Clic5/Ptk7/Six2/Ift140/Zeb1/Tcf7l2/Rbp4/Sufu/Gli1/Sox1…	189	ALL_DEGs
GO:0003015	heart process	'153/7948'	247/19294	0.619433	1.50369	6.66819	3.10458e-11	2.49585e-09	1.61786e-09	Calm1/Jup/Cacna1e/Atp1a2/Cav1/Tcap/Met/Kcnq1/Psen2/Stc1/Ace2/Cacna1d/Tbx5/Scn1b/Calm3/Hey2/Fyn/Ccn2/Sirt1/Avpr1a/Sgcd/Smtn/Map2k6/Fkbp1b/Ace/Ryr2/Edn1/Pde4d/Thrb/Gata4/Ednrb/Nup155/Cxadr/Atp5pf/Sod1/Rps6ka2/Ehd3/Cacna1h/Epas1/Dsc2/Hbegf/Nedd4l/Slc1a1/Gaa/Rgs2/Tnnt2/Tnni1/Atp2b4/Atp1b1/Gsn/Ext2/Snta1/Edn3/Wwtr1/Shox2/Casq2/Tacr3/Pde4b/Edn2/Slc9a1/Sema3a/Nos3/Nmu/Atp2a2/P2rx4/Kcnj8/Abcc9/Dmpk/Csrp3…	153	ALL_DEGs
GO:0198738	cell-cell signaling by wnt	'250/7948'	442/19294	0.565611	1.37304	6.64036	3.35257e-11	2.64038e-09	1.71155e-09	Wnt3/Wnt9a/Axin2/Cdh1/Tcf7/Ift20/Col6a1/Pfdn5/Col1a1/Itga3/Dlx3/Jup/Ccne1/Tsc2/Tgfb1/Apoe/Hbp1/Klf4/Stk11/Grk5/Dvl3/Cul3/Cd44/Ccn4/Nid1/Sulf2/Cav1/Fzd3/Tle1/Gprc5b/Wnt2/Prdm15/Bicc1/Lrrk1/Wnt11/Celsr1/Sulf1/Rac3/Stk4/Ctdnep1/Sfrp5/Rspo3/Egfr/Apc2/Lgr5/Wif1/Fbxw11/Kremen1/Sdc1/Nherf1/Nxn/Gsc/Gli3/Edn1/Barx1/Spin1/Ror2/Nkd2/Depdc1b/Fgf10/Map3k1/Lats2/Fgf9/Amer2/Wnt5a/Gpc5/Ednrb/Dab2/Sema5a/Ctnnd2/F…	250	ALL_DEGs
GO:0071526	semaphorin-plexin signaling pathway	'44/7948'	51/19294	0.862745	2.09434	6.5495	3.36751e-11	2.64038e-09	1.71155e-09	Sema4f/Sema6b/Mef2c/Met/Sema6a/Edn1/Sema4d/Sema3g/Gdnf/Sema5a/Sh3bp1/Sema4g/Nrp1/Nrp2/Sema4c/Plxna2/Sema6d/Sema4a/Sema3c/Sema3a/Crmp1/Plxna4/Plxna1/Plxnd1/Sema4b/Flna/Plxna3/Ednra/Farp2/Sema3f/Plxnb2/Hand2/Sema7a/Sema6c/Ncam1/Sema3d/Sema5b/Plxnb1/Ece1/Sema3b/Erbb2/Kdr/Sema3e/Plxnc1	44	ALL_DEGs
GO:0051963	regulation of synapse assembly	'98/7948'	144/19294	0.680556	1.65207	6.57351	5.95358e-11	4.61112e-09	2.98902e-09	Adgre5/Efnb3/Mef2c/Ephb3/Clstn3/Elavl2/Asic2/Dlg4/Ntn1/Sema4d/Dlg5/Wnt5a/Il1rap/Ptk2/Robo1/App/Thbs2/Nrxn1/Cbln2/Dkk1/St8sia2/Snca/Stau2/Rab17/Grin1/Tlr2/Sema4a/Ntrk1/Pdlim5/Epha7/Ptprd/Wnt7a/Gpc4/Srpx2/Slit2/Vps35/Vstm5/Clstn2/Ephb1/Ppp1r9a/Slitrk5/Adgrb3/Six4/Ptpn13/Lrrn1/Mdga2/Eef2k/Abi3bp/Tpbg/Lrfn5/Lrrn3/Lzts1/Slitrk2/Psd/Srcin1/Negr1/Pik3r1/Agrn/Cux2/Sipa1l1/Lrrtm3/Mdga1/Arf6/Fzd1/Lingo2/Lr…	98	ALL_DEGs
GO:0050807	regulation of synapse organization	'183/7948'	308/19294	0.594156	1.44233	6.54957	6.53854e-11	5.00316e-09	3.24315e-09	Cttnbp2/Ncan/Tsc2/Adgre5/Apoe/Efnb3/Mef2c/Ephb3/Cdc20/Homer1/Clstn3/Elavl2/Psen2/Etv5/Kif1a/Sparc/Fyn/Srgn/Nrcam/Asic2/Dlg4/Ntn1/Rps6ka5/Nedd9/Sema4d/Ror2/Dlg5/Wnt5a/Nefl/Asap1/Il1rap/Ptk2/Robo1/App/Nfatc4/Thbs2/Trem2/Nrxn1/Cdh2/Cbln2/Dkk1/St8sia2/Itgb1/Snca/Stau2/Nrp2/Epha4/Ngef/Rab17/Fcgr2b/Abl1/Grin1/Caprin1/Slc7a11/Tlr2/Sema4a/Ntrk1/Pdlim5/Epha7/Ptprd/Lrp8/Mfn2/Sparcl1/Ptn/Wnt7a/Grin2b/Ptpro/…	183	ALL_DEGs
GO:0007156	homophilic cell adhesion via plasma membrane adhesion molecules	'79/7948'	110/19294	0.718182	1.74341	6.54427	6.92866e-11	5.23856e-09	3.39574e-09	Cdh1/Cdh4/Nectin4/Pcdha10/Clstn3/Cdh23/Celsr1/Mypn/Nrcam/Pecam1/Emb/Cdh10/Nectin3/Igsf11/Robo1/Celsr3/Cdh2/Dsc2/Pcdh12/Myot/Cdh9/Cdh7/Cdh17/Ret/L1cam/Tenm3/Cdh11/Cdh13/Cdh5/Cdh15/Kirrel3/Cadm1/Clstn2/Ptprm/Ptprf/Igsf9b/Prtg/Pcdh8/Cdh8/Plxnb2/Dchs1/Pcdh18/Igsf9/Nexn/Cdh26/Cdh6/Cntn5/Sdk1/Cdh12/Sdk2/Pcdhb14/Dsg2/Fat4/Amigo2/Pcdh10/Pcdh20/Cdh20/Amigo1/Pcdh19/Pcdh1/Pcdhb6/Robo2/Pcdh15/Ptprt/Cdh22/Cad…	79	ALL_DEGs
GO:0031346	positive regulation of cell projection organization	'258/7948'	461/19294	0.559653	1.35857	6.52194	7.20001e-11	5.37967e-09	3.48721e-09	Ngfr/Wnt3/Cdh4/Kat2b/Serpinf1/Bcl11a/Ift20/Rnd2/Itga3/Fam98a/Metrn/Tsc2/Mien1/Prkd1/Apoe/Stk11/Dvl3/Ddr1/Crtc1/Coro1c/Aqp1/Crabp2/Hspb1/Igf1r/Eif4g2/Kit/Ranbp1/Eps8l1/Epor/Ptbp1/Hap1/Gprc5b/Bmp7/Dynll1/Met/Itga2/Eps8/Tenm1/Pfn1/Mapt/Scn1b/Fyn/Sgk1/Sirt1/Cobl/Efemp1/Fkbp1b/Nme2/Dlg4/Ntn1/Akap5/Nin/Plek2/Tgfb3/Carmil1/Nedd9/Sema4d/Ror2/Bmp4/Atp8a2/Wnt5a/Nefl/Sema5a/Washc5/Enpp2/Rrn3/Chodl/Robo1/Ada…	258	ALL_DEGs
GO:0010634	positive regulation of epithelial cell migration	'107/7948'	161/19294	0.664596	1.61333	6.54065	7.42971e-11	5.48676e-09	3.55662e-09	Alox12/Col18a1/Itga3/Tgfb1/Prkd1/Stat5a/Gab2/Aqp1/Hdac9/Hspb1/Hmox1/Tek/Fut1/Rab25/Met/Hyal1/Gata2/Sash1/Itga2/Gata3/Plcg1/Cd40/Mmp9/Pfn1/Adora2b/Sparc/Igf1/Sirt1/Flt4/Pik3cg/Itgb3/Map3k3/Hif1a/Lgmn/Gpld1/Plk2/Fgf10/Bmp4/Capn7/Wnt5a/Sema5a/Angpt1/Has2/Enpp2/Hdac7/Ptk2/Snai2/Bsg/Smoc2/Vegfa/Mapre2/Hbegf/Anxa1/Nrp1/Epb41l5/Abl1/Fgf7/Glipr2/Plpp3/Nos3/Tgfbr3/P2rx4/Tacr1/Foxp1/Wnt7a/Cib1/Hdac6/Srpx2/…	107	ALL_DEGs
GO:0042060	wound healing	'210/7948'	363/19294	0.578512	1.40436	6.50935	8.22122e-11	6.00149e-09	3.89028e-09	Tspan32/Alox12/Pparg/Acvrl1/Timp1/Fkbp10/Vwf/Ppard/Axl/Cd36/Apoe/Ddr1/Ptpn6/Aqp1/Cnn2/Cd44/Ccn4/Prdx2/Hmox1/Fbln1/Slc4a1/Cav1/Mertk/Hps5/Gata2/Celsr1/Tubb1/Sdc4/C1qtnf1/Crk/Igf1/Plek/Itgb3/Pecam1/P2rx1/Slc6a4/Hif1a/Evl/Syk/Msx2/Fgf10/Map3k1/Gata4/Anxa8/Wnt5a/Dmtn/Ajuba/Fzd6/Cldn1/Ptk2/Snai2/Mylk/Cxadr/Pros1/Cdkn1a/Serping1/Wfdc1/Smoc2/Tnfrsf12a/Vegfa/Enpp4/Ptk7/Emilin2/Tpsab1/Hbegf/Slc12a2/Anxa1/…	210	ALL_DEGs
GO:0042692	muscle cell differentiation	'260/7948'	466/19294	0.55794	1.35442	6.48203	9.29422e-11	6.70768e-09	4.34805e-09	Tbx2/Ccnd2/Myf5/Il4/Ift20/Col6a1/Ramp2/Efnb2/Naglu/Daxx/Tgfb1/Prkd1/Lamb1/Dnmt1/Large1/Hdac9/Ccn4/Klf5/Nid1/Mef2c/Kit/Actn3/Ptbp1/Casq1/Homer1/Tcap/Fhl2/Hdac5/Tbx1/Mymk/Met/Myod1/Cacna2d2/Piezo1/Dll1/Actn1/Xk/Notch4/Plekho1/Med28/Cacnb4/Rarb/Pmp22/Tbx5/Kdm6b/Tbx3/Hey2/Lama2/Igf1/Mybpc1/Sirt1/Mypn/Meis1/Frs2/Csrp2/Sgcd/Id2/Krt19/Tshz3/Dpf3/Edn1/Nln/Fgf10/Bmp4/Gata4/Fgf9/Rb1/Ednrb/Myc/Col14a1/Wnt7b…	260	ALL_DEGs
GO:0061035	regulation of cartilage development	'56/7948'	71/19294	0.788732	1.91467	6.46235	9.7103e-11	6.92923e-09	4.49166e-09	Wnt9a/Axin2/Tgfb1/Glg1/Ccn4/Por/Ihh/Rarb/Ccn2/Efemp1/Rflnb/Gli3/Thrb/Bmp4/Wnt5a/Snai2/Six2/Pkdcc/Ltbp3/Frzb/Mdk/Bmp2/Shox2/Ctsk/Ccn1/Prkg2/Smad1/Smpd3/Adamts7/Smad3/Idua/Scx/Loxl2/Rflna/Hoxa11/Gdf5/Trps1/Bmp6/Runx2/Tgfb2/Sox5/Mustn1/Hoxd11/Adamts12/Gli2/Nog/Pthlh/Zfp219/Nkx3-2/Gdf6/Sox6/Maf/Mkx/Chadl/Zbtb16/Grem1	56	ALL_DEGs
GO:0008360	regulation of cell shape	'97/7948'	143/19294	0.678322	1.64665	6.496	9.93012e-11	7.00736e-09	4.54231e-09	Gna12/Hpn/Hck/Arhgef18/Kit/Fblim1/Plekho1/Eps8/Crk/Rac3/Fyn/Epb41l2/Ccl11/Nherf1/Coch/Sema4d/Hexb/Dmtn/Myo10/Ptk2/Fgd4/Fmnl3/Vegfa/Epb41l3/Myl12a/Rhoq/Bambi/Diaph1/Csf1r/Anxa1/Dnmbp/Limd1/Itga7/Fn1/Spta1/Plxna2/Ermn/P2ry1/Sema4a/Pdpn/Fgr/Shroom3/Pxn/Plxna4/Ptn/Plxna1/Plxnd1/Cyfip1/Gas2/Aldoa/Coro1a/Myh14/Msn/Plxna3/Dlc1/Phip/Tpm1/Arap1/S100b/Palmd/Ypel4/Myl12b/Ccl7/Palm/Fmnl2/Plxnb2/Icam1/F11r/Lp…	97	ALL_DEGs
GO:0060993	kidney morphogenesis	'73/7948'	100/19294	0.73	1.7721	6.47882	1.04462e-10	7.29051e-09	4.72585e-09	Irx2/Tgfb1/Pgf/Cd44/Bmp7/Klhl3/Gata3/Lama5/Ahr/Tshz3/Gli3/Ptch1/Fgf10/Bmp4/Gdnf/Myc/Wnt7b/Hes1/Vegfa/Six2/Sox8/Eya1/Kif26b/Vangl2/Bmp2/Wwtr1/Wnt2b/Calb1/Sall1/Irx3/Agt/Nphp3/Wnt6/Lif/Six4/Fras1/Wnk4/Tmem59l/Lrrk2/Wnt4/Dchs1/Fgf2/Hoxa11/Hoxb7/Gcnt1/Timeless/Hey1/Npnt/Hoxd11/Greb1l/Zmpste24/Fmn1/Fat4/Hs3st3a1/Hes5/Nog/Agtr1a/Adamts16/Lgr4/Cited1/Six1/Tacstd2/Pbx1/Commd5/Gpc3/Bcl2/Irx1/Erbb4/Agtr2/H…	73	ALL_DEGs
GO:0006029	proteoglycan metabolic process	'66/7948'	88/19294	0.75	1.82065	6.45783	1.14421e-10	7.89876e-09	5.12013e-09	Naglu/Ppard/Sgsh/Ihh/Sulf2/Hyal1/Sulf1/Igf1/Hexb/Col2a1/Tcf7l2/Chst10/Vangl2/Ext2/Bmp2/Slc2a10/Col11a1/Ndst4/Ndst3/Slc35d1/Extl1/Ugdh/Acan/Xylt1/Btk/Glce/Adamts7/Chpf/Slc35d2/Idua/Fam20b/Gpc1/Chst11/Hpse/Ids/Csgalnact1/Chst12/Slc35b2/Man1c1/Chst7/Chpf2/Dsel/Ndst2/Hs3st6/Csgalnact2/Arsb/Mustn1/Pxylp1/Hs3st5/Hs6st1/B3gat1/Hs3st2/Chst9/Adamts12/Hs3st3a1/Hs3st1/Hs6st3/Ndst1/Chst3/Chsy3/Chst8/Ext1/Hs6…	66	ALL_DEGs
GO:1903522	regulation of blood circulation	'161/7948'	266/19294	0.605263	1.46929	6.45055	1.27222e-10	8.68806e-09	5.63177e-09	Calm1/Jup/Cacna1e/Atp1a2/Cav1/Kcnq1/Stc1/Ace2/Cacna1d/Tbx5/Scn1b/Ahr/Calm3/Hey2/Ccn2/Sirt1/Egfr/Avpr1a/Smtn/Fkbp1b/Ace/Asic2/P2rx1/Hif1a/Ryr2/Edn1/Drd1/Hmgcr/Pde4d/Thrb/Gata4/Ednrb/Nup155/Cxadr/Atp5pf/App/Ehd3/Cacna1h/Epas1/Dsc2/Hbegf/Htr7/Slc1a1/Add3/Gaa/Alox5/Itgb1/Rgs2/Tnnt2/Atp2b4/Atp1b1/Abl1/Itga4/Snta1/Edn3/Shox2/Casq2/Tacr3/Svep1/Pde4b/Edn2/Slc9a1/Sema3a/Nos3/Cd38/Nmu/Atp2a2/P2rx4/Tbxas1/T…	161	ALL_DEGs
GO:0050919	negative chemotaxis	'38/7948'	43/19294	0.883721	2.14526	6.29243	1.6428e-10	1.09217e-08	7.07969e-09	Sema4f/Sema6b/Sema6a/Itgb3/Ntn1/Sema4d/Sema3g/Wnt5a/Robo1/Slit1/Sema4g/Pdgfa/Nrp2/Sema4c/Sema6d/Sema4a/Sema3c/Sema3a/Plxna4/Sema4b/Plxna3/Slit2/Apoa1/Sema3f/Sema7a/Sema6c/Sema3d/Rtn4r/Rtn4rl1/Lrtm1/Igfals/Lgr4/Robo2/Slit3/Sema3b/Unc5c/Nrg1/Sema3e	38	ALL_DEGs
GO:0001656	metanephros development	'64/7948'	85/19294	0.752941	1.82779	6.40152	1.64366e-10	1.09217e-08	7.07969e-09	Irx2/Akr1b1/Hoxc11/Aqp1/Bmp7/Id2/Tshz3/Gli3/Tfap2a/Ptch1/Fgf10/Dlg5/Bmp4/Nkx3-1/Gdnf/Osr2/Myc/Mtss1/Wnt7b/Hes1/Six2/Sox8/Pdgfrb/Pdgfa/Sox17/Rdh10/Tfap2b/Eya1/Kif26b/Itga8/Fbn1/Wwtr1/Calb1/Ret/Slit2/Sall1/Irx3/Lif/Six4/Fras1/Wnt4/Spry1/Hoxa11/Egr1/Hoxd11/Greb1l/Fmn1/Pou3f3/Foxc2/Fat4/Hes5/Lgr4/Cited1/Gdf6/Six1/Robo2/Lamb2/Aph1c/Gpc3/Bcl2/Irx1/Agtr2/Grem1/Foxd1	64	ALL_DEGs
GO:0010811	positive regulation of cell-substrate adhesion	'96/7948'	142/19294	0.676056	1.64115	6.41803	1.6509e-10	1.09217e-08	7.07969e-09	Egfl6/Itga5/Itga3/Jup/Cd36/Col26a1/Nid1/Fbln1/Tek/Fut1/Csf1/Sdc4/Crk/Rac3/Stk4/Agr2/Itgb3/Smoc1/Carmil1/Nedd9/Olfm4/Dab2/Has2/Enpp2/Emp2/Ccdc80/Smoc2/Vegfa/Vit/Lims2/Pcsk5/Jak2/Efemp2/P4hb/Ptprj/Itgb1/Nrp1/Fn1/Epb41l5/Abl1/Itga6/Mdk/Fermt1/Npy2r/Ccn1/Prkcz/Emilin1/Spp1/Npy/Ptn/Cib1/Flna/L1cam/Plekha2/Cdh13/Thy1/Apoa1/Smad3/Cspg5/Triobp/Dnm2/Edil3/Dbn1/Abi3bp/Wnt4/Ninj1/Rras/Prex1/Dag1/Thbs1/Cdk6/…	96	ALL_DEGs
GO:0032970	regulation of actin filament-based process	'229/7948'	404/19294	0.566832	1.376	6.39249	1.69973e-10	1.11288e-08	7.21394e-09	Hip1r/Rnd2/Jup/Rhoc/Scin/Tgfb1/Prkd1/Hck/Arhgef18/Cnn2/Mef2c/Atp1a2/Cav1/Met/Fhod1/Stc1/Eps8/Wnt11/Celsr1/Tenm1/Sdc4/Rnd3/Myo1c/Crk/Rac3/Pfn1/Wasf1/Ccn2/Washc3/Plek/Cyfip2/Pdlim4/Cyria/Ccl11/Itgb3/Pecam1/Sptb/Tgfb3/Evl/Ryr2/Carmil1/Nedd9/Edn1/Iqgap2/Pde4d/Map3k1/Gpr65/Gata4/Dmtn/Carmil3/Sema5a/Washc5/Mtss1/Sh3bp1/Rapgef3/Nckap1l/Lima1/Arhgap28/Cacna1h/Dsc2/Pdgfrb/Csf1r/Capn1/Add3/Nrp1/Stau2/Tmeff…	229	ALL_DEGs
GO:0010001	glial cell differentiation	'169/7948'	283/19294	0.597173	1.44966	6.3779	2.00128e-10	1.29695e-08	8.40711e-09	Pparg/Col6a1/Naglu/Metrn/Ncan/Tgfb1/Nab1/Dll3/Stat3/Akt2/Large1/Bcan/Ndrg1/Nfib/Dll1/B4galt5/Erbb3/Pmp22/Ifngr1/Ascl1/Igf1/Egfr/Adora2a/Id2/Itgb4/Gfap/Gli3/Id4/Ror2/Drd1/Tppp/Hapln1/Vcan/Fgf10/Il6st/Bmp4/Clu/Enpp2/Hes1/Clcn2/App/Sod1/Dhh/Dlx2/Tnfrsf21/Trem2/Sox8/Cdh2/Nr3c1/Mbd1/Csf1r/Il33/Tcf7l2/Ptprj/Epha4/Serpine2/Slc45a3/Vim/Lamc3/Abl1/Zeb2/Notch1/Abca2/Mdk/Spint1/Bmp2/Mal/Tspan2/Notch2/Lef1/T…	169	ALL_DEGs
GO:0090497	mesenchymal cell migration	'50/7948'	62/19294	0.806452	1.95768	6.3214	2.28287e-10	1.4645e-08	9.49315e-09	Sema4f/Sema6b/Coro1c/Bmp7/Tbx1/Lama5/Sema6a/Kitl/Hif1a/Edn1/Sema4d/Bmp4/Sema3g/Ednrb/Gdnf/Sema5a/Sox8/Cdh2/Sema4g/Nrp1/Nrp2/Sema4c/Fn1/Zeb2/Sema6d/Edn3/Pitx2/Sema4a/Sema3c/Sema3a/Radil/Ret/Sema4b/Ednra/Sox10/Gbx2/Sema3f/Tpbg/Twist1/Hand2/Sema7a/Sema6c/Nrtn/Sema3d/Isl1/Sema5b/Cfl1/Sema3b/Erbb4/Sema3e	50	ALL_DEGs
GO:1901890	positive regulation of cell junction assembly	'89/7948'	130/19294	0.684615	1.66192	6.33788	2.75675e-10	1.74825e-08	1.13325e-08	Acvrl1/Adgre5/Ephb3/Tek/Epha2/Cav1/Clstn3/Ace2/Sdc4/Tbx5/Asic2/Dlg4/Sema4d/Dlg5/Enpp2/Cldn1/Il1rap/Thbs2/Vegfa/Nrxn1/Cbln2/Ptprj/St8sia2/Nrp1/Stau2/Epb41l5/Abl1/Sema4a/Ntrk1/Ptprd/Wnt7a/Srpx2/Slit2/Irx3/Vstm5/Agt/Thy1/Smad3/Clstn2/Ephb1/Slitrk5/Adgrb3/Lrrn1/Eef2k/Tpbg/Lrrn3/Slitrk2/Wnt4/Cntnap2/Nphp4/Col16a1/Cldn5/Pik3r1/Agrn/S100a10/Cux2/Lrrtm3/Fmn1/Crb3/Lingo2/Lrtm1/Slitrk6/Slitrk4/Flrt2/Flrt1/…	89	ALL_DEGs
GO:0060541	respiratory system development	'158/7948'	262/19294	0.603053	1.46393	6.32802	2.78025e-10	1.74825e-08	1.13325e-08	Tbx2/Tbx4/Loxl3/Sec24b/Col6a1/Itga3/Tulp3/Tgfb1/Plod3/Fgfr4/Fgfrl1/Nfib/Psen2/Wnt2/Aldh1a2/Aldh1a3/Lama5/Celsr1/Ctsz/Tbx5/Sparc/Rcn3/Ccn2/Ascl1/Igf1/Wdpcp/Flt4/Tns3/Agr2/Ace/Tshz3/Tgfb3/Meg3/Gli3/Fgf10/Nkiras1/Thrb/Dlg5/Bmp4/Gata4/Fgf9/Wnt5a/Spry2/Zfpm2/Wnt7b/Hes1/Clcn2/Vegfa/Ptk7/Foxp4/Man2a1/Abca3/Epas1/Pkdcc/Lox/Pdgfrb/Lipa/Ltbp3/Rbp4/Gli1/Tnrc6c/Pdgfa/Rdh10/Msc/Eya1/Col3a1/Igfbp5/Vangl2/Notch…	158	ALL_DEGs
GO:0050803	regulation of synapse structure or activity	'185/7948'	316/19294	0.585443	1.42118	6.3182	2.85784e-10	1.77942e-08	1.15346e-08	Cttnbp2/Ncan/Tsc2/Adgre5/Apoe/Efnb3/Mef2c/Ephb3/Cdc20/Homer1/Clstn3/Elavl2/Psen2/Etv5/Kif1a/Sparc/Fyn/Srgn/Nrcam/Asic2/Dlg4/Ntn1/Rps6ka5/Nedd9/Sema4d/Ror2/Dlg5/Wnt5a/Nefl/Sybu/Asap1/Il1rap/Ptk2/Robo1/App/Nfatc4/Thbs2/Trem2/Nrxn1/Cdh2/Cbln2/Dkk1/St8sia2/Itgb1/Snca/Stau2/Nrp2/Epha4/Ngef/Rab17/Fcgr2b/Abl1/Grin1/Caprin1/Slc7a11/Tlr2/Sema4a/Ntrk1/Pdlim5/Epha7/Ptprd/Lrp8/Mfn2/Sparcl1/Ptn/Wnt7a/Grin2b/P…	185	ALL_DEGs
GO:0090596	sensory organ morphogenesis	'181/7948'	308/19294	0.587662	1.42657	6.31617	2.90894e-10	1.79366e-08	1.16268e-08	Tbx2/Sec24b/Hpn/Naglu/Dvl3/Stat3/Large1/Aqp1/Epha2/Ihh/Tcap/Fzd3/Bmp7/Tbx1/Gnat2/Kcnq1/Bcr/Eya4/Cdh23/Dll1/Gata2/Aldh1a3/Gata3/Celsr1/Rarb/Tbx3/Ikzf1/Meis1/Frs2/Wdpcp/Nherf1/Ntn1/Tshr/Gsc/Hif1a/Gli3/Tfap2a/Edn1/Ror2/Hcn1/Fgf10/Thrb/Bmp4/Fgf9/Atp8a2/Wnt5a/Spry2/Fzd6/Osr2/Myc/Col2a1/Nectin3/Arl6/Sod1/Vegfa/Clic5/Ptk7/Man2a1/Six2/Sox8/Zeb1/Slc1a1/Rbp4/Pitx3/Stau2/Eya1/Col5a2/Cfh/Vangl2/Prrx1/Itga8/C…	181	ALL_DEGs
GO:0030282	bone mineralization	'91/7948'	134/19294	0.679104	1.64855	6.30526	3.40175e-10	2.07736e-08	1.34658e-08	Axin2/Col6a1/Mef2c/Actn3/Bmp7/Atraid/Wnt11/Igf1/Srgn/Rflnb/Hif1a/Tfap2a/Aspn/Bmp4/Ank/Osr2/Mtss1/Vdr/Pkdcc/Lox/Csf1r/Ltbp3/Tcf7l2/Fbxl15/Ifitm5/Alox5/Clec3b/Ccr1/Fam20c/Ddr2/Bmp2/Ecm1/Ccn1/Alpl/Fgr/Fosl2/Spp1/Ibsp/P2rx7/Col1a2/Ptn/Mgp/Gpm6b/Eif2ak3/Comp/Smpd3/Tent5a/Smad3/Ptgs2/Pth1r/Bmp2k/Twist1/Prickle1/Wnt4/Enpp1/Klf10/Rflna/Cer1/Trpm4/Snx10/Bmp6/Runx2/Suv39h1/Icmt/Matn1/Dlk1/Notum/Zmpste24/S1…	91	ALL_DEGs
GO:0009100	glycoprotein metabolic process	'200/7948'	347/19294	0.576369	1.39915	6.27972	3.56932e-10	2.15893e-08	1.39946e-08	Galnt1/Naglu/Ppard/St8sia6/Man1a/Large1/Plod3/Sgsh/Ihh/Sulf2/Fut1/Derl3/Hyal1/St3gal1/Sulf1/Acot8/B4galt5/Mgat4c/Igf1/Phlda1/Pofut2/Gfpt2/Galnt10/Fut8/Hif1a/Galnt16/Entpd5/Gcnt2/Ctsl/Hexb/Itm2b/Dad1/Golph3/Pmm1/Col2a1/B3gnt5/St3gal6/St6gal1/Cela1/Galnt14/Man2a1/St6gal2/Hbegf/Il33/Tcf7l2/Oga/St8sia2/Chst10/Mgat4a/Vangl2/Soat1/St6galnac6/Galnt5/Slc4a10/Abca2/Galnt3/Ext2/Bmp2/Cst3/Slc2a10/Ptx3/Col11…	200	ALL_DEGs
GO:1904018	positive regulation of vasculature development	'116/7948'	181/19294	0.640884	1.55576	6.28743	3.77168e-10	2.25981e-08	1.46485e-08	Itgb2/Acvrl1/Itga5/Hk2/Ramp2/Jup/Tgfb1/Prkd1/Klf4/Stat3/Aqp1/Pgf/Hspb1/Hmox1/Tek/Fut1/Hyal1/Dll1/Gata2/Sash1/Cybb/Notch4/Cd34/Plcg1/Brca1/Cd40/Mmp9/Ptgis/Mydgf/Sirt1/Ccl11/Itgb3/Hif1a/Erap1/Aggf1/Gata4/Wnt5a/Cma1/Sema5a/Rapgef3/Emp2/Runx1/Cela1/Smoc2/Vegfa/Emilin2/C3/Itgb8/Itgb1/Nrp1/Pdcl3/Tnn/Eng/Abl1/Mdk/Sfrp2/Ntrk1/Ecm1/F3/Ddah1/Jak1/Hgf/Nos3/Add1/Emilin1/Pxn/Flt1/Tjp1/Adm/Vegfd/Angpt2/Vegfc/T…	116	ALL_DEGs
GO:0002181	cytoplasmic translation	'99/7948'	149/19294	0.66443	1.61292	6.28605	3.84634e-10	2.283e-08	1.47989e-08	Hnrnpd/Rpl13/Rps11/Rpl8/Rps9/Rplp1/Rps18/Rps15a/Rps25/Rpl15/Rps5/Igf2bp1/Rpl19/Rwdd1/Cpeb4/Rps27a/Mif4gd/Unk/Impact/Rps14/Rps24/Rps26/Paip1/Rplp2/Cpeb1/Rpl14/Rps3a1/Rps20/Ncbp1/Rps6/Eif3i/Rpl22/Rpl6/Rpl28/Rps3/Rps4x/Eif4ebp1/Rpsa/Rps29/Rps16/Rpl10a/Rbm24/Fau/Rpl12/Rps21/Rpl39l/Rpl22l1/Hnrnpu/Cpeb2/Rps19/Rpl21/Dhx29/Nmnat2/Rpl7/Rps2/Rpl18a/Rpl37a/Rpl27a/Rpl9/Rps8/Rpl29/Rps23/Rpl36al/Rps10/Rpl38/Rp…	99	ALL_DEGs
GO:0042471	ear morphogenesis	'93/7948'	138/19294	0.673913	1.63594	6.27499	4.12639e-10	2.42655e-08	1.57294e-08	Tbx2/Sec24b/Hpn/Naglu/Dvl3/Tcap/Fzd3/Tbx1/Kcnq1/Bcr/Eya4/Cdh23/Dll1/Gata2/Aldh1a3/Gata3/Celsr1/Tbx3/Wdpcp/Nherf1/Ntn1/Tshr/Gsc/Tfap2a/Edn1/Ror2/Fgf10/Fgf9/Atp8a2/Wnt5a/Spry2/Fzd6/Osr2/Myc/Col2a1/Sod1/Clic5/Ptk7/Six2/Zeb1/Eya1/Vangl2/Prrx1/Itga8/Frzb/Col11a1/Kcnq4/Dlx6/Dlx5/Lrig1/Myo7a/Ush1c/Fgfr1/Ednra/Tbx18/Triobp/Myo6/Six4/Gbx2/Ripor2/Stox1/Grhl3/Enpp1/Tecta/Wdr19/Sobp/Whrn/Prrx2/Gjb6/Hesx1/Chd…	93	ALL_DEGs
GO:0048863	stem cell differentiation	'159/7948'	265/19294	0.6	1.45652	6.26296	4.17179e-10	2.43074e-08	1.57565e-08	Tbx2/Wnt3/Sema4f/Sema6b/Ap2a2/Stat3/Coro1c/Mef2c/Kit/Bmp7/Tbx1/Aldh1a2/Lama5/Tbx5/Chd3/Tbx3/Sema6a/Krt10/Esr1/Kitl/Vsir/Gsc/Hif1a/Ccnk/Tfap2a/Edn1/Sema4d/Msx2/Bmp4/Sema3g/Ednrb/Gdnf/Sema5a/Wnt7b/L3mbtl2/Trp63/Hes1/Snai2/Zscan10/Lbh/Eif2ak2/Sox8/Cdh2/Hspa9/Tcof1/Ltbp3/Cyp26a1/Sema4g/Itgb1/Nrp1/Sox17/Rdh10/Nrp2/Sema4c/Wnt10a/Fn1/Ptprc/Klhl12/Zeb2/Phf19/Notch1/Frzb/Sema6d/Jag1/Edn3/Ncoa3/Sfrp2/Pitx2…	159	ALL_DEGs
GO:0006816	calcium ion transport	'242/7948'	434/19294	0.557604	1.3536	6.23581	4.47437e-10	2.58334e-08	1.67457e-08	Nalcn/Rem1/Lck/Calm1/Ramp2/Il16/Tgfb1/Prkd1/Grin2d/Cacnb3/Gstm7/Cacna1e/Ptpn6/Cyba/Hap1/Atp1a2/Casq1/Homer1/Cav1/Trpm5/Cacna2d2/Psen2/Plcd1/Mcoln2/Cdh23/Trpv4/Stc1/Cacna1d/Plcg1/Stac2/Cacnb4/Jph2/Ahr/Calm3/Fyn/Mrln/Myb/Ccn2/Igf1/Adora2a/Stc2/Pik3cg/Tspan13/Rgs9/Fkbp1b/Ace/Itgb3/Cacng4/P2rx1/Atp2a3/Akap5/Ryr2/Edn1/Drd1/Pde4d/Camk2g/Ero1a/Bmp4/Cacna2d3/Ednrb/Jph4/Smdt1/Rapgef3/Vdr/Srl/Hes1/P2rx6/My…	242	ALL_DEGs
GO:0022612	gland morphogenesis	'102/7948'	155/19294	0.658065	1.59747	6.25072	4.80058e-10	2.74671e-08	1.78047e-08	Tbx2/Cdh1/Hpn/Hoxd13/Stat6/Tgfb1/Elf3/Edar/Ddr1/Rps6ka1/Stat5a/Cul3/Cd44/Igf1r/Epha2/Sulf2/Cav1/Nfib/Bmp7/Met/Etv5/Csf1/Lama5/Sulf1/Tbx3/Esr1/Ntn4/Igf1/Egfr/Frs2/Ccl11/Nherf1/Ntn1/Esr2/Gli3/Id4/Ptch1/Msx2/Fgf10/Bmp4/Wnt5a/Nkx3-1/Vdr/Trp63/Snai2/Robo1/Lims2/Nr3c1/Slc12a2/Lipa/Capn1/Gli1/Nrp1/Pdgfa/Igfbp5/Notch1/Fgf7/Mdk/Ncoa3/Notch2/Tnc/Tfap2c/Sema3c/Hgf/Sema3a/Ptn/Tgfa/Plxna1/Plxnd1/Mki67/Msn/Pol…	102	ALL_DEGs
GO:0030323	respiratory tube development	'142/7948'	232/19294	0.612069	1.48582	6.23072	5.21202e-10	2.92934e-08	1.89885e-08	Tbx2/Tbx4/Loxl3/Sec24b/Col6a1/Itga3/Tulp3/Tgfb1/Plod3/Fgfr4/Nfib/Psen2/Wnt2/Aldh1a2/Lama5/Celsr1/Ctsz/Tbx5/Sparc/Rcn3/Ccn2/Ascl1/Igf1/Flt4/Tns3/Agr2/Ace/Tshz3/Tgfb3/Meg3/Gli3/Fgf10/Nkiras1/Thrb/Dlg5/Bmp4/Gata4/Fgf9/Wnt5a/Spry2/Zfpm2/Wnt7b/Hes1/Clcn2/Vegfa/Ptk7/Foxp4/Man2a1/Abca3/Epas1/Pkdcc/Lox/Pdgfrb/Pcsk5/Lipa/Ltbp3/Rbp4/Gli1/Tnrc6c/Pdgfa/Rdh10/Eya1/Col3a1/Igfbp5/Vangl2/Notch1/Fbn1/Fgf7/Bmp2/Sl…	142	ALL_DEGs
GO:0050920	regulation of chemotaxis	'142/7948'	232/19294	0.612069	1.48582	6.23072	5.21202e-10	2.92934e-08	1.89885e-08	Wnt3/Sema4f/Il4/Sema6b/Efnb2/Il16/Spi1/Tgfb1/Prkd1/Dusp3/Akt2/Pgf/Hspb1/Rarres2/Met/Trpv4/Csf1/Itga2/Lbp/Sema6a/Lgmn/Nedd9/Edn1/Sema4d/Cxcl14/Thbs4/Fgf10/Sema3g/Wnt5a/Sema5a/Nckap1l/Ptk2/Snai2/Robo1/St6gal1/App/Smoc2/Pla2g7/Vegfa/Trem2/Dusp1/Aif1/Cd74/Pdgfrb/Csf1r/Slit1/Sema4g/Ptprj/Ccr1/Nrp1/Mstn/Sema4c/Fn1/Notch1/Stk39/Sema6d/Mdk/Edn3/Sema4a/Creb3/Artn/Edn2/Sema3c/Sema3a/Ppbp/P2rx4/Plxna4/Ptn/S…	142	ALL_DEGs
GO:0045766	positive regulation of angiogenesis	'114/7948'	178/19294	0.640449	1.55471	6.22278	5.66323e-10	3.15501e-08	2.04514e-08	Itgb2/Acvrl1/Itga5/Hk2/Ramp2/Jup/Prkd1/Klf4/Stat3/Aqp1/Pgf/Hspb1/Hmox1/Tek/Fut1/Hyal1/Dll1/Gata2/Sash1/Cybb/Notch4/Cd34/Plcg1/Brca1/Cd40/Mmp9/Ptgis/Mydgf/Sirt1/Ccl11/Itgb3/Hif1a/Erap1/Aggf1/Gata4/Wnt5a/Cma1/Sema5a/Rapgef3/Emp2/Runx1/Cela1/Smoc2/Vegfa/Emilin2/C3/Itgb8/Itgb1/Nrp1/Pdcl3/Tnn/Eng/Abl1/Mdk/Sfrp2/Ntrk1/Ecm1/F3/Ddah1/Jak1/Hgf/Nos3/Add1/Emilin1/Pxn/Flt1/Tjp1/Adm/Vegfd/Angpt2/Vegfc/Tlr3/Sm…	114	ALL_DEGs
GO:2000027	regulation of animal organ morphogenesis	'75/7948'	106/19294	0.707547	1.71759	6.20044	6.48629e-10	3.58212e-08	2.322e-08	Ngfr/Cdh1/Sec24b/Pax9/Hoxc11/Tgfb1/Dvl3/Fgfr4/Bmp7/Tbx1/Met/Wnt2/Etv5/Csf1/Gata3/Celsr1/Cd34/Sulf1/Sfrp5/Ntn4/Frs2/Edn1/Fgf10/Bmp4/Wnt5a/Gdnf/Snai2/Robo1/Vegfa/Ptk7/Six2/Sox8/Dkk1/Pdgfa/Wnt10a/Vangl2/Sapcd2/Fgf7/Bmp2/Wnt2b/Sfrp2/Hgf/Sfrp1/Fgfr1/Ednra/Sall1/Agt/Six4/Wnt4/Stox1/Grhl3/Spry1/Fgf2/Hoxa11/Hoxb7/Runx2/Ajap1/Ift88/Hoxd11/Pkhd1/Fzd1/Ar/Msx1/Nog/Agtr1a/Lgr4/Six1/Tacstd2/Rspo2/Robo2/Cav3/Tn…	75	ALL_DEGs
GO:0048839	inner ear development	'132/7948'	213/19294	0.619718	1.50438	6.19524	6.57675e-10	3.60077e-08	2.33409e-08	Tbx2/Cdh1/Sec24b/Ift20/Hpn/Naglu/Mcm2/Dvl3/Gabrb2/Tcap/Fzd3/Tbx1/Kcnq1/Bcr/Cdh23/Dll1/Gata2/Aldh1a3/Gata3/Celsr1/Ift27/Sdc4/Tbx3/Hey2/Lin7a/Igf1/Lgr5/Wdpcp/Nherf1/Ntn1/Tshr/Gli3/Tfap2a/Ror2/Cxcl14/Fgf10/Bmp4/Fgf9/Atp8a2/Wnt5a/Spry2/Lrp10/Fzd6/Col2a1/Hes1/Sod1/Clic5/Ptk7/Zeb1/Eya1/Epha4/Vangl2/Prrx1/Itga8/Notch1/Frzb/Jag1/Bmp2/Col11a1/Kcnq4/Mycl/Dlx6/Dlx5/Gsdme/Lrig1/Myo7a/Ush1c/Fgfr1/Bmper/Tbx18/…	132	ALL_DEGs
GO:0022407	regulation of cell-cell adhesion	'272/7948'	498/19294	0.546185	1.32588	6.1666	6.65441e-10	3.61215e-08	2.34147e-08	Tspan32/Itgb2/Cdh1/Alox12/Lck/Loxl3/Icosl/Il4/Lgals9/Efnb2/Spi1/Tsc2/Tgfb1/Klf4/Dusp3/Nfat5/Efnb3/Stat5a/Ptpn6/Il12b/Cd244a/Hspb1/Cd44/Prdx2/Ephb3/Ihh/Slc4a1/Hfe/Cav1/Zmiz1/Bmp7/Ascl2/Adam19/Tnfaip8l2/Trpv4/Piezo1/Cd83/Notch4/Gata3/Tnr/Cd274/Sdc4/C1qtnf1/Irf1/Kitl/Arg1/Igf1/Vsir/Adora2a/Fstl3/Havcr2/Stat5b/Gli3/Gcnt2/Syk/Pde4d/Il6st/Dlg5/Bmp4/Wnt5a/Tnfsf11/Myo10/Has2/Nckap1l/Bcl6/Hes1/Ptk2/Cblb/T…	272	ALL_DEGs
GO:0003205	cardiac chamber development	'121/7948'	192/19294	0.630208	1.52985	6.17548	7.53267e-10	4.05423e-08	2.62803e-08	Tbx2/Naglu/Ltbp1/Tgfb1/Dvl3/Mef2c/Epor/Tek/Fgfrl1/Fhl2/Bmp7/Tbx1/Wnt2/Gata3/Wnt11/Tbx5/Dnah11/Tbx3/Ahr/Hey2/Frs2/Id2/Hif1a/Ryr2/Msx2/Bmp4/Gata4/Fgf9/Wnt5a/Zfpm2/Hes1/Robo1/Adamts1/Ptk7/Pcsk5/Rbp4/Sufu/Nrp1/Nrp2/Tnnt2/Tnni1/Vangl2/Eng/Notch1/Jag1/Dll4/Bmp2/Ccm2l/Sall4/Shox2/Notch2/Col11a1/Sfrp2/Npy2r/Pitx2/Ccn1/Lmo4/Sema3c/Ube4b/Nos3/Tgfbr3/Plxnd1/Kcnj8/Pde2a/Slit2/Ednra/Sall1/Bmp5/Smarca4/Stra6/T…	121	ALL_DEGs
GO:0030324	lung development	'140/7948'	229/19294	0.611354	1.48408	6.16769	7.71016e-10	4.11489e-08	2.66735e-08	Tbx2/Tbx4/Loxl3/Sec24b/Col6a1/Itga3/Tgfb1/Plod3/Fgfr4/Nfib/Psen2/Wnt2/Aldh1a2/Lama5/Celsr1/Ctsz/Tbx5/Sparc/Rcn3/Ccn2/Ascl1/Igf1/Flt4/Tns3/Agr2/Ace/Tshz3/Tgfb3/Meg3/Gli3/Fgf10/Nkiras1/Thrb/Dlg5/Bmp4/Gata4/Fgf9/Wnt5a/Spry2/Zfpm2/Wnt7b/Hes1/Clcn2/Vegfa/Ptk7/Foxp4/Man2a1/Abca3/Epas1/Pkdcc/Lox/Pdgfrb/Lipa/Ltbp3/Rbp4/Gli1/Tnrc6c/Pdgfa/Rdh10/Eya1/Col3a1/Igfbp5/Vangl2/Notch1/Fbn1/Fgf7/Bmp2/Slc7a11/Wnt2b/…	140	ALL_DEGs
GO:0010721	negative regulation of cell development	'184/7948'	317/19294	0.580442	1.40904	6.14593	8.30791e-10	4.39696e-08	2.8502e-08	Wnt3/Lhx2/Cdh1/Sema4f/Loxl3/Bcl11a/Il4/Sema6b/Tsc2/Tgfb1/Dll3/Efnb3/Ulk2/Hspb1/Cd44/Prdx2/Ihh/Bmp7/Ascl2/Gata2/Hmgb3/Map2/Tnr/Irf1/Sema6a/Igf1/Appl2/Fstl3/Id2/Ccl11/Rflnb/Nme2/Ntn1/Gpr137b/Gli3/Id4/Sema4d/Bmp4/Sema3g/Wnt5a/Tsc22d1/Rb1/Ednrb/Sema5a/Myc/Wnt7b/Bcl6/Hes1/Ptk2/Snai2/Runx1/Tmem176a/Dlx2/Nfatc4/Vegfa/Trem2/Tmem178/Adcyap1/Hspa9/Mbd1/Cd74/Anxa1/Fas/Tjp2/Slit1/Sema4g/Pitx3/Nrp1/Ctla4/Sema…	184	ALL_DEGs
GO:0001755	neural crest cell migration	'48/7948'	60/19294	0.8	1.94202	6.1166	8.83461e-10	4.63707e-08	3.00584e-08	Sema4f/Sema6b/Coro1c/Bmp7/Tbx1/Lama5/Sema6a/Kitl/Hif1a/Edn1/Sema4d/Bmp4/Sema3g/Ednrb/Gdnf/Sema5a/Sox8/Sema4g/Nrp1/Nrp2/Sema4c/Fn1/Zeb2/Sema6d/Edn3/Pitx2/Sema4a/Sema3c/Sema3a/Radil/Ret/Sema4b/Ednra/Sox10/Gbx2/Sema3f/Twist1/Hand2/Sema7a/Sema6c/Nrtn/Sema3d/Isl1/Sema5b/Cfl1/Sema3b/Erbb4/Sema3e	48	ALL_DEGs
GO:0031214	biomineral tissue development	'114/7948'	179/19294	0.636872	1.54602	6.14269	9.29292e-10	4.83765e-08	3.13586e-08	Axin2/Col6a1/Col1a1/Tgfb1/Mef2c/Tuft1/Actn3/Bmp7/Tbx1/Atraid/Wnt11/Hey2/Igf1/Srgn/Fam20a/Rflnb/Hif1a/Tfap2a/Aspn/Msx2/Bmp4/Ank/Osr2/Mtss1/Vdr/Pkdcc/Lox/Csf1r/Ltbp3/Tcf7l2/Fbxl15/Ifitm5/Alox5/Clec3b/Ccr1/Fam20c/Ddr2/Notch1/Bmp2/Ecm1/Ccn1/Alpl/Fgr/Nos3/Fosl2/Amtn/Spp1/Ibsp/Tfip11/P2rx7/Col1a2/Ptn/Mgp/Gpm6b/Gas6/Fgfr1/Eif2ak3/Comp/Smpd3/Tent5a/Smad3/Ptgs2/Pth1r/Wnt6/Bmp2k/Twist1/Prickle1/Wnt4/Enpp1/…	114	ALL_DEGs
GO:0006937	regulation of muscle contraction	'107/7948'	166/19294	0.644578	1.56473	6.11603	1.10271e-09	5.69376e-08	3.6908e-08	Rem1/Lck/Calm1/Jup/Prkd1/Irag1/Kit/Actn3/Atp1a2/Casq1/Cav1/Kcnq1/Trpv4/Stc1/Ace2/Itga2/Ncf1/Tnnc2/Adora2b/Calm3/Ccn2/Smtn/Fkbp1b/P2rx1/Ryr2/Edn1/Pde4d/Gata4/Sod1/Nr4a1/Ehd3/Cacna1h/Dsc2/Htr7/Rgs2/Tnnt2/Atp1b1/Casq2/Npy2r/Tacr3/Pde4b/Edn2/Slc9a1/Nmu/Atp2a2/P2rx4/Flt1/Tacr1/Dmpk/Ryr1/Calca/Atp2a1/Fgf13/Chrna3/Hcn4/Ptgs2/Ank2/Rangrf/Atp1a1/Adra2a/Gucy1a1/Dbn1/Tbxa2r/Chrnb4/Tnni3/Pawr/Dock4/Fxyd1/Trp…	107	ALL_DEGs
GO:0090287	regulation of cellular response to growth factor stimulus	'187/7948'	324/19294	0.57716	1.40107	6.09355	1.13793e-09	5.8282e-08	3.77795e-08	Ngfr/Pparg/Acvrl1/Il4/Itga3/Ltbp1/Tgfb1/Stk11/Glg1/Il12b/Htra1/Tek/Sulf2/Chrd/Cav1/Fgfrl1/Brms1l/Dll1/Gata3/Sulf1/Myo1c/Sema6a/Wasf1/Dcn/Sirt1/Vsir/Fstl3/Cyfip2/Sap30l/Ube2o/Hif1a/Tgfb3/Aspn/Msx2/Fgf10/Fst/Bmp4/Gata4/Lats2/Fgf9/Wnt5a/Tsc22d1/Cnmd/Spry2/Angpt1/Hes1/Robo1/Smoc2/Vegfa/Crim1/Nrxn1/Tmem204/Bambi/Zeb1/Spry4/Cidea/Lox/Dkk1/Tcf7l2/Got1/Fbxl15/Cd63/Ark2c/Itgb1/Nrp1/Fam20c/Tfap2b/Atp2b4/It…	187	ALL_DEGs
GO:0035904	aorta development	'55/7948'	72/19294	0.763889	1.85436	6.07878	1.26003e-09	6.40198e-08	4.14989e-08	Tbx2/Ngfr/Acvrl1/Sec24b/Efnb2/Fkbp10/Naglu/Ltbp1/Chrd/Tbx1/Notch4/Hey2/Nkx3-1/Hes1/Mylk/Robo1/Lox/Pdgfrb/Efemp2/Sufu/Gaa/Tfap2b/Eya1/Col3a1/Eng/Notch1/Jag1/Dll4/Ephb4/Adamts9/Plxnd1/Pde2a/Gla/Ednra/Smarca4/Tgfbr2/Dnm2/Ap2b1/Prickle1/Enpp1/Egr2/Prdm1/Tgfb2/Lrp1/Hey1/Chd7/Aplnr/Cxcr4/Adamts6/Kif7/Six1/Robo2/Ndst1/Sox4/Pde2a	55	ALL_DEGs
GO:0050905	neuromuscular process	'124/7948'	199/19294	0.623116	1.51263	6.08386	1.31427e-09	6.62454e-08	4.29415e-08	Rem1/Gm2a/Prkd1/Grin2d/Large1/Pex5/Slc1a3/Actn3/Casq1/Homer1/Tcap/Rbfox1/Bcr/Cdh23/Camta1/Aldh1a3/Tnr/Tnnc2/Stac2/Rac3/Pmp22/Ascl1/Adora2a/Adarb1/Dlg4/Myh3/Npas3/Tshz3/Hexb/Pde8b/Atp8a2/Nefl/Jph4/Hoxc10/Fgf12/Adcy5/App/Nr4a1/Clic5/Nrxn1/Ighmbp2/Fgf14/Gaa/Chrnd/Chrng/Cfh/Tnni1/Parp1/Abl1/Grin1/Chrna1/Map1a/Glrb/Uchl1/Grin2b/Kcnj8/Dmpk/Synm/Atp2a1/Myh14/Myo7a/Ush1c/Tnni2/Ap1s2/Ednra/Vps35/Comp/Aplp…	124	ALL_DEGs
GO:0032330	regulation of chondrocyte differentiation	'44/7948'	54/19294	0.814815	1.97799	6.0233	1.50008e-09	7.50158e-08	4.86267e-08	Wnt9a/Axin2/Glg1/Ccn4/Por/Ihh/Rarb/Ccn2/Efemp1/Rflnb/Gli3/Thrb/Bmp4/Snai2/Six2/Pkdcc/Ltbp3/Mdk/Shox2/Prkg2/Adamts7/Smad3/Loxl2/Rflna/Hoxa11/Gdf5/Trps1/Bmp6/Runx2/Sox5/Mustn1/Hoxd11/Adamts12/Gli2/Pthlh/Zfp219/Nkx3-2/Gdf6/Sox6/Maf/Mkx/Chadl/Zbtb16/Grem1	44	ALL_DEGs
GO:0048864	stem cell development	'67/7948'	93/19294	0.72043	1.74886	6.05885	1.54533e-09	7.6675e-08	4.97022e-08	Sema4f/Sema6b/Coro1c/Bmp7/Tbx1/Aldh1a2/Lama5/Sema6a/Kitl/Hif1a/Tfap2a/Edn1/Sema4d/Bmp4/Sema3g/Ednrb/Gdnf/Sema5a/Wnt7b/Hes1/Snai2/Sox8/Cdh2/Tcof1/Cyp26a1/Sema4g/Nrp1/Rdh10/Nrp2/Sema4c/Fn1/Ptprc/Klhl12/Zeb2/Sema6d/Jag1/Edn3/Pitx2/Sema4a/Sema3c/Sema3a/Radil/Kbtbd8/Wnt7a/Ret/Sema4b/Ednra/Sox10/Gbx2/Sema3f/Twist1/Alx1/Fgf2/Hand2/Sema7a/Sema6c/Nrtn/Sema3d/Isl1/Foxc2/Sema5b/Cfl1/Bcl2/Sema3b/Erbb4/Sema3e…	67	ALL_DEGs
GO:0007517	muscle organ development	'206/7948'	364/19294	0.565934	1.37382	6.02625	1.6674e-09	8.20905e-08	5.32126e-08	Myf5/Col6a1/Naglu/Srpk3/Tgfb1/Hlf/Etv1/Large1/Hdac9/Klf5/Mef2c/Epor/Actn3/Usp19/Homer1/Cav1/Tcap/Fgfrl1/Rbfox1/Hdac5/Tbx1/Mymk/Met/Myod1/Wnt2/Dll1/Xk/Lama5/Jph2/Erbb3/Pmp22/Unc45b/Hey2/Plagl1/Arid5b/Sirt1/Hmg20b/Adarb1/Gsc/Dpf3/Fos/Meg3/Ryr2/Pitx1/Hmgcr/Nln/Nr1d2/Bmp4/Gata4/Wnt5a/Rb1/Zfpm2/Angpt1/Myc/Mtss1/Hdac7/Boc/Mylk/Rcan1/Nr4a1/Fhl1/Sox8/Uqcc2/Lox/Megf10/Efemp2/Tcf7l2/Tll2/Itgb1/Msc/Col3a1/M…	206	ALL_DEGs
GO:0060326	cell chemotaxis	'178/7948'	307/19294	0.579805	1.40749	6.02376	1.75206e-09	8.55948e-08	5.54842e-08	Itgb2/Il4/Il16/Spi1/Prkd1/Myo9b/Pgf/Hspb1/Kit/Epha2/Rarres2/Met/Trpv4/Csf1/Lbp/Elmo2/Mmp9/Crk/Rac3/Ccl9/Dpep1/Agr2/Ccl11/Hoxb9/Lgmn/Nedd9/Edn1/Syk/Cxcl14/Pde4d/Thbs4/Wnt5a/Tnfsf11/Ednrb/Sema5a/Enpp2/Nckap1l/Ptk2/Snai2/Cxadr/App/Nr4a1/Bsg/Smoc2/Pla2g7/Vegfa/Dusp1/Aif1/Hbegf/Lox/Il17b/Slc12a2/Cd74/Pdgfrb/Csf1r/Anxa1/Gbf1/Ptprj/Alox5/Ccr1/Nrp1/Mstn/Eng/Notch1/Stk39/Mdk/Edn3/Vcam1/Lef1/Creb3/Pde4b/Ed…	178	ALL_DEGs
GO:0097529	myeloid leukocyte migration	'141/7948'	233/19294	0.60515	1.46902	6.02842	1.79305e-09	8.69287e-08	5.63489e-08	Itgb2/Il4/Spi1/Cnn2/Myo9b/Pgf/Kit/Rarres2/Bcr/Mcoln2/Trpv4/Csf1/Lbp/Mmp9/Rac3/Ccl9/Dpep1/Kitl/Ccl11/Pecam1/Stat5b/Lgmn/Edn1/Syk/Ror2/Pde4d/Thbs4/Tnfsf11/Ednrb/Nckap1l/Emp2/Ptk2/Cd200/Cxadr/App/Bsg/Pla2g7/Vegfa/Trem2/Dusp1/Aif1/Il17b/Cd74/Csf1r/Anxa1/Gbf1/Ptprj/Ccr1/Il1r1/Mstn/Mdk/Edn3/Tlr2/B4galt1/Creb3/Pde4b/Edn2/Csf3r/Emilin1/Spp1/Ppbp/Pf4/Cxcl1/P2rx4/Flt1/Ptpro/Il17rc/Cd9/Itgam/Swap70/Vegfd/Ve…	141	ALL_DEGs
GO:0021675	nerve development	'68/7948'	95/19294	0.715789	1.7376	6.03185	1.83404e-09	8.82425e-08	5.72005e-08	Ngfr/Naglu/Large1/Slc1a3/Sulf2/Gabrb2/Tbx1/Sulf1/Erbb3/Adarb1/Gli3/Tfap2a/Edn1/Hes1/Ark2c/Nptx1/Nrp1/Nrp2/Serpine2/Itga4/Ngf/Vcam1/Ntrk1/Unc13b/Sema3a/Plxna4/Lrig1/Plxna1/Ret/Tmem126a/Plxna3/Ednra/Sall1/Ephb1/Six4/Sema3f/Unc13a/Egr2/Nrtn/Atp8b1/Dag1/Ndp/Kcna2/Chd7/Drgx/Slc24a4/Isl1/Ackr3/Dmd/Slitrk6/Bdnf/Ntf3/Tifab/Six1/Nav2/Fgfr3/Kcnq3/Ece1/Col25a1/Ext1/Scn1a/Ntf5/Mafb/Scn2a/Hoxb2/Prkcg/Hoxa3/Rp…	68	ALL_DEGs
GO:0048659	smooth muscle cell proliferation	'121/7948'	194/19294	0.623711	1.51408	6.0231	1.90465e-09	9.09505e-08	5.89559e-08	Gna12/Alox12/Pparg/Cnn1/Akr1b1/Ppard/Tgfb1/Apoe/Klf4/Foxj2/Dnmt1/Il12b/Ccn4/Hmox1/Igf1r/Mef2c/Cyba/Cav1/Vipr2/Ace2/Itga2/Mmp9/Esr1/Myb/Timp3/Igf1/Egfr/Frs2/Igfbp3/Id2/Itgb3/Ern1/Stat5b/Esr2/Mnat1/Hif1a/Tgfb3/Edn1/Ogn/Hmgcr/Pde4d/Bmp4/Fgf9/Npr3/Myc/Apod/Ptk2/Adamts1/Cdkn1a/Vegfa/Aif1/Hbegf/Pdgfrb/Jak2/Efemp2/Tcf7l2/Ddit3/Drd4/Igfbp5/Ddr2/Rgs5/Traf6/Bmp2/Il6ra/Map3k7/Orc1/Park7/Nos3/Mfn2/Ppargc1a/F…	121	ALL_DEGs
GO:0014033	neural crest cell differentiation	'69/7948'	97/19294	0.71134	1.7268	6.00608	2.15664e-09	1.02215e-07	6.62578e-08	Sema4f/Sema6b/Coro1c/Mef2c/Bmp7/Tbx1/Aldh1a2/Lama5/Sema6a/Kitl/Gsc/Hif1a/Tfap2a/Edn1/Sema4d/Bmp4/Sema3g/Ednrb/Gdnf/Sema5a/Hes1/Snai2/Sox8/Cdh2/Tcof1/Cyp26a1/Sema4g/Nrp1/Rdh10/Nrp2/Sema4c/Wnt10a/Fn1/Klhl12/Zeb2/Frzb/Sema6d/Jag1/Edn3/Pitx2/Sema4a/Sema3c/Sema3a/Radil/Kbtbd8/Ret/Sema4b/Sfrp1/Ednra/Sox10/Gbx2/Sema3f/Twist1/Hand2/Sema7a/Sema6c/Nrtn/Sema3d/Zic5/Isl1/Foxc2/Six1/Sema5b/Cfl1/Sema3b/Rps7/Ex…	69	ALL_DEGs
GO:0030278	regulation of ossification	'93/7948'	141/19294	0.659574	1.60114	5.99613	2.31437e-09	1.08878e-07	7.05771e-08	Tgfb1/Mef2c/Actn3/Scube2/Bmp7/Atraid/Csf1/Srgn/Kremen1/Rsad2/Rflnb/Hif1a/Tfap2a/Thrb/Bmp4/Wnt5a/Cnmd/Ank/Osr2/Vdr/Calcr/Six2/Pkdcc/Csf1r/Dkk1/Ltbp3/Ifitm5/Alox5/Ccr1/Fam20c/Ddr2/Notch1/Creb3l1/Mdk/Gfra4/Bmp2/Ecm1/Ccn1/P3h1/P2rx7/Ptn/Tacr1/Mgp/Calca/Gpm6b/Sfrp1/Comp/Tent5a/Smad3/P2ry2/Bmp2k/Twist1/Wnt4/Enpp1/Egr2/Rflna/Trpm4/Smurf1/Bmp6/Runx2/Suv39h1/Ptger4/Matn1/Kremen2/Dlk1/Notum/Zmpste24/S1pr1/…	93	ALL_DEGs
GO:0048483	autonomic nervous system development	'40/7948'	48/19294	0.833333	2.02294	5.93893	2.34002e-09	1.09276e-07	7.08346e-08	Fzd3/Tbx1/Gata3/Ascl1/Adarb1/Slc6a4/Kif26a/Tfap2a/Ednrb/Gdnf/Trp63/Hes1/Sox8/Gfra3/Nrp1/Tfap2b/Nrp2/Fn1/Vcam1/Ntrk1/Sema3a/Plxna4/Ret/Plxna3/Ednra/Sox10/Gbx2/Sema3f/Egr2/Hand2/Hlx/Ackr3/Ntf3/Six1/Nav2/Erbb2/Sox11/Insm1/Hoxb2/Sox4	40	ALL_DEGs
GO:0050770	regulation of axonogenesis	'116/7948'	185/19294	0.627027	1.52213	5.97241	2.59787e-09	1.20431e-07	7.8066e-08	Wnt3/Cdh1/Cdh4/Sema4f/Bcl11a/Sema6b/Rnd2/Metrn/Tsc2/Apoe/Stk11/Efnb3/Ulk2/Crabp2/Eif4g2/Ephb3/Map2/Xk/Tnr/Mapt/Sema6a/Ntn1/Nin/Sema4d/Sema3g/Wnt5a/Nefm/Nefl/Sema5a/Ptk2/Chodl/Robo1/Ache/Tnfrsf12a/Vegfa/Cdh2/Slit1/Sema4g/Nrp1/Sema4c/Fn1/Epha4/Plxna2/Vim/Zeb2/Grin1/Sema6d/Skil/Shox2/Ngf/Sema4a/Epha7/Dab1/Sema3c/Sema3a/Draxin/Ulk1/Limk1/Plxna4/Kel/Plxna1/Wnt7a/Ret/Plxnd1/Cyfip1/Sema4b/Pak1/Fgf13/Dcx…	116	ALL_DEGs
GO:0007264	small GTPase-mediated signal transduction	'239/7948'	434/19294	0.550691	1.33682	5.93988	2.68799e-09	1.23706e-07	8.01885e-08	Ngfr/Gna12/Kctd10/Rnd2/Itga3/Foxm1/Tnk1/Sipa1l2/Rhoc/Tsc2/Apoe/Cul3/Arhgef18/Myo9b/Rasa4/Sh2b2/Hmox1/Eps8l1/Tek/Met/Vav2/Bcr/Gm266/Git1/Csf1/Abca1/Eps8/Celsr1/Stard13/Rnd3/Timp2/Crk/Cyth3/Cyth4/Rac3/Gabarap/Wasf1/Arfgef3/Kitl/Igf1/Srgap1/Tns3/Pik3cg/Pecam1/Ntn1/Rab15/Net1/Sema4d/Arhgef28/Plk2/Rasgrf2/Fgf10/Nkiras1/Gpr65/Arhgef3/Rhobtb2/Dok2/Spry2/Sh3bp1/Rapgef3/Bcl6/Plaat1/Arl6/Robo1/Racgap1/Rheb…	239	ALL_DEGs
GO:0061333	renal tubule morphogenesis	'62/7948'	85/19294	0.729412	1.77067	5.9598	2.80349e-09	1.28093e-07	8.30326e-08	Irx2/Tgfb1/Pgf/Cd44/Mef2c/Hdac5/Klhl3/Gata3/Lama5/Lgr5/Gli3/Ptch1/Bmp4/Gdnf/Myc/Mtss1/Hes1/Vegfa/Six2/Sox8/Eya1/Kif26b/Bmp2/Wnt2b/Col4a1/Sall1/Irx3/Agt/Wnt6/Six4/Pkd2/Wnk4/Tmem59l/Wnt4/Dchs1/Fgf2/Hoxa11/Hoxb7/Timeless/Hey1/Npnt/Hoxd11/Greb1l/Fmn1/Fat4/Hs3st3a1/Hes5/Nog/Agtr1a/Adamts16/Lgr4/Six1/Tacstd2/Pbx1/Commd5/Gpc3/Bcl2/Irx1/Agtr2/Hs3st3b1/Grem1/Foxd1	62	ALL_DEGs
GO:0007178	transmembrane receptor protein serine/threonine kinase signaling pathway	'209/7948'	372/19294	0.561828	1.36385	5.93092	2.92753e-09	1.32805e-07	8.60871e-08	Pparg/Acvrl1/Acvr1b/Lgals9/Itga3/Dlx3/Ltbp1/Spi1/Tgfb1/Stk11/Glg1/Stat3/Htra1/Hfe/Chrd/Cav1/Zmiz1/Bmp7/Brms1l/Sulf1/Sirt1/Vsir/Wif1/Appl2/Fstl3/Sap30l/Ube2o/Fut8/Fos/Tgfb3/Gcnt2/Hivep1/Aspn/Ror2/Msx2/Fgf10/Map3k1/Fst/Bmp4/Gata4/Lats2/Dcp1a/Fgf9/Wnt5a/Tsc22d1/Spry2/Gdnf/Dab2/Hes1/Ptk2/Itgb5/Crim1/Bambi/Zeb1/Cidea/Lox/Lpxn/Jak2/Dkk1/Ltbp3/Tcf7l2/Got1/Fbxl15/Itgb8/Ark2c/Tnrc6c/Tfap2b/Col3a1/Mstn/Par…	209	ALL_DEGs
GO:0008016	regulation of heart contraction	'121/7948'	195/19294	0.620513	1.50631	5.94755	2.9904e-09	1.34695e-07	8.73122e-08	Calm1/Jup/Cacna1e/Atp1a2/Cav1/Kcnq1/Stc1/Ace2/Cacna1d/Tbx5/Scn1b/Calm3/Hey2/Ccn2/Sirt1/Avpr1a/Smtn/Fkbp1b/Ace/Ryr2/Edn1/Pde4d/Thrb/Gata4/Ednrb/Nup155/Cxadr/Atp5pf/Ehd3/Cacna1h/Epas1/Dsc2/Hbegf/Slc1a1/Gaa/Rgs2/Tnnt2/Atp2b4/Atp1b1/Snta1/Edn3/Shox2/Casq2/Tacr3/Pde4b/Edn2/Slc9a1/Sema3a/Nos3/Nmu/Atp2a2/P2rx4/Kcnj8/Abcc9/Dmpk/Csrp3/Chrna7/Mef2a/Adm/Fgf13/Flna/Ednra/Irx3/Irx5/Agt/Hcn4/Tpm1/Tbx18/Ank2/Ra…	121	ALL_DEGs
GO:1904062	regulation of monoatomic cation transmembrane transport	'184/7948'	321/19294	0.573209	1.39148	5.91974	3.22332e-09	1.44164e-07	9.34499e-08	Rem1/Il4/Calm1/Tgfb1/Prkd1/Grin2d/Cacnb3/Gstm7/Ptpn6/Cyba/Hap1/Atp1a2/Casq1/Homer1/Cav1/Kcnq1/Fxyd5/Psen2/Cacna1d/Plcg1/Stac2/Cacnb4/Mmp9/Jph2/Kcnab3/Scn1b/Ahr/Calm3/Fyn/Mrln/Pik3cg/Tspan13/Rgs9/Fkbp1b/Itgb3/Nherf1/P2rx1/Akap5/Ryr2/Edn1/Drd1/Pde4d/Bmp4/Rapgef3/Fgf12/App/Fhl1/Cd4/Trem2/Ehd3/Lhcgr/Diaph1/Nedd4l/Gal/Gsto1/Oga/Cd63/Drd4/Fgf14/Itgb1/Iscu/Snca/Oprk1/Gpr39/Dbi/Atp2b4/Rgs7/Atp1b1/Abl1/Gr…	184	ALL_DEGs
GO:0010594	regulation of endothelial cell migration	'110/7948'	174/19294	0.632184	1.53464	5.9293	3.38503e-09	1.50338e-07	9.7452e-08	Alox12/Pparg/Acvrl1/Serpinf1/Col18a1/Jup/Tgfb1/Prkd1/Apoe/Klf4/Stat5a/Hdac9/Hspb1/Hmox1/Mef2c/Tek/Epha2/Fut1/Hdac5/Met/Stc1/Gata2/Sash1/Gata3/Stard13/Plcg1/Cd40/Adora2b/Sparc/Dcn/Igf1/Sirt1/Flt4/Pik3cg/Itgb3/Map3k3/Hif1a/S2bpcox16/Lgmn/Gpld1/Plk2/Bmp4/Wnt5a/Sema5a/Angpt1/Sh3bp1/Hdac7/Emp2/Snai2/Bsg/Smoc2/Vegfa/Anxa1/Nrp1/Atp2b4/Abl1/Notch1/Dll4/Spred1/Sema4a/Plpp3/Svbp/Nos3/Tgfbr3/P2rx4/Adamts9/F…	110	ALL_DEGs
GO:0050879	multicellular organismal movement	'49/7948'	63/19294	0.777778	1.88808	5.90919	3.46592e-09	1.52861e-07	9.90878e-08	Rem1/Col6a1/Prkd1/Actn3/Casq1/Homer1/Tcap/Tnnc2/Stac2/Ascl1/Myh3/Tshz3/Atp8a2/Nr4a1/Diaph1/Gaa/Nppc/Chrnd/Chrng/Tnni1/Parp1/Chrna1/Map1a/Dmpk/Synm/Atp2a1/Myh14/Tnni2/Vps35/Comp/Spr/Diaph2/Cacna1a/Tnni3/Stac3/Rcsd1/Chrnb1/Kcnj2/Dmd/Adrb2/Myh7/Myh8/Hipk2/Tnnt3/Cav3/Tnnt1/Grcc10/Slc8a3/Tnnc1	49	ALL_DEGs
GO:0141091	transforming growth factor beta receptor superfamily signaling pathway	'195/7948'	344/19294	0.56686	1.37607	5.89048	3.7749e-09	1.65341e-07	1.07177e-07	Pparg/Acvrl1/Acvr1b/Lgals9/Itga3/Dlx3/Ltbp1/Spi1/Tgfb1/Stk11/Glg1/Stat3/Htra1/Hfe/Chrd/Cav1/Zmiz1/Bmp7/Brms1l/Sulf1/Sirt1/Vsir/Wif1/Appl2/Fstl3/Sap30l/Ube2o/Fut8/Fos/Tgfb3/Gcnt2/Hivep1/Aspn/Ror2/Msx2/Fgf10/Map3k1/Fst/Bmp4/Gata4/Lats2/Dcp1a/Fgf9/Wnt5a/Tsc22d1/Spry2/Gdnf/Dab2/Hes1/Ptk2/Itgb5/Crim1/Bambi/Zeb1/Cidea/Lox/Lpxn/Dkk1/Ltbp3/Tcf7l2/Got1/Fbxl15/Itgb8/Ark2c/Tnrc6c/Tfap2b/Col3a1/Mstn/Parp1/It…	195	ALL_DEGs
GO:0003007	heart morphogenesis	'165/7948'	283/19294	0.583039	1.41534	5.89123	3.90825e-09	1.70009e-07	1.10203e-07	Tbx2/Axin2/Acvrl1/Sec24b/Naglu/Tgfb1/Dvl3/Mef2c/Epor/Tek/Ihh/Zmiz1/Tcap/Fgfrl1/Fhl2/Bmp7/Tbx1/Wnt2/Aldh1a2/Dll1/Gata3/Wnt11/Tbx5/Dnah11/Tbx3/Ahr/Hey2/Id2/Hif1a/Ryr2/Tfap2a/Edn1/Ptch1/Msx2/Bmp4/Gata4/Fgf9/Wnt5a/Zfpm2/Angpt1/Has2/Col2a1/Emp2/Hes1/Snai2/Robo1/Adamts1/Adamts5/Vegfa/Pim1/Dkk1/Rbp4/Sufu/Gaa/Nrp1/Sox17/Eya1/Nrp2/Tnnt2/Tnni1/Vangl2/Eng/Col5a1/Notch1/Jag1/Dll4/Bmp2/Ccm2l/Shox2/Notch2/Col1…	165	ALL_DEGs
GO:0035296	regulation of tube diameter	'115/7948'	184/19294	0.625	1.51721	5.89996	3.99703e-09	1.71521e-07	1.11183e-07	Kat2b/Ppard/Apoe/Plod3/Irag1/Atp1a2/Cav1/Adora2b/Ahr/Sirt1/Egfr/Avpr1a/Adora2a/Ace/Asic2/P2rx1/Slc6a4/Esr2/Hif1a/Edn1/Drd1/Hmgcr/Ednrb/Npr3/Ptk2/Sod1/Vegfa/Adcyap1/Htr7/Add3/Alox5/Itgb1/Nppc/Rgs2/Abl1/Itga4/Ext2/Snta1/Edn3/P2ry1/Gclm/Svep1/Edn2/Nos3/Cd38/Tgfbr3/P2rx4/Tbxas1/Tacr1/Kcnj8/Calca/Adm/Ednra/Mmp2/Cx3cl1/Comp/Smpd3/Agt/Ptgs2/Manf/P2ry2/Mgll/Ptprm/Adra2a/Gucy1a1/Faah/Dusp5/Tbxa2r/Htr2a/Ac…	115	ALL_DEGs
GO:0097746	blood vessel diameter maintenance	'115/7948'	184/19294	0.625	1.51721	5.89996	3.99703e-09	1.71521e-07	1.11183e-07	Kat2b/Ppard/Apoe/Plod3/Irag1/Atp1a2/Cav1/Adora2b/Ahr/Sirt1/Egfr/Avpr1a/Adora2a/Ace/Asic2/P2rx1/Slc6a4/Esr2/Hif1a/Edn1/Drd1/Hmgcr/Ednrb/Npr3/Ptk2/Sod1/Vegfa/Adcyap1/Htr7/Add3/Alox5/Itgb1/Nppc/Rgs2/Abl1/Itga4/Ext2/Snta1/Edn3/P2ry1/Gclm/Svep1/Edn2/Nos3/Cd38/Tgfbr3/P2rx4/Tbxas1/Tacr1/Kcnj8/Calca/Adm/Ednra/Mmp2/Cx3cl1/Comp/Smpd3/Agt/Ptgs2/Manf/P2ry2/Mgll/Ptprm/Adra2a/Gucy1a1/Faah/Dusp5/Tbxa2r/Htr2a/Ac…	115	ALL_DEGs
GO:0051056	regulation of small GTPase mediated signal transduction	'143/7948'	239/19294	0.598326	1.45245	5.89083	4.04324e-09	1.7234e-07	1.11714e-07	Ngfr/Kctd10/Itga3/Foxm1/Tnk1/Sipa1l2/Tsc2/Apoe/Cul3/Arhgef18/Myo9b/Rasa4/Sh2b2/Eps8l1/Tek/Met/Bcr/Git1/Csf1/Abca1/Eps8/Stard13/Timp2/Crk/Cyth3/Cyth4/Gabarap/Arfgef3/Kitl/Igf1/Tns3/Pik3cg/Net1/Sema4d/Arhgef28/Fgf10/Gpr65/Arhgef3/Spry2/Sh3bp1/Bcl6/Robo1/Arhgap28/Mapre2/Cdh2/Psd2/Spry4/Pdgfrb/Arhgap19/Eps8l2/Itgb1/Nrp1/Col3a1/Abl1/Notch1/Psd4/Rasgrp1/Ngf/Notch2/Ntrk1/Stmn1/Mfn2/Auts2/Adcyap1r1/Arhga…	143	ALL_DEGs
GO:0045444	fat cell differentiation	'154/7948'	261/19294	0.590038	1.43234	5.88565	4.10125e-09	1.73018e-07	1.12154e-07	Axin2/Pparg/Mmp11/Fndc5/Lrp3/Ppard/Tgfb1/Klf4/Grk5/Sh2b2/Ccn4/Klf5/Bbs1/Runx1t1/Dio2/Bmp7/Rarres2/Steap4/Clip3/Trpv4/Gata2/Lpl/Stk4/Slc2a4/Lama4/Arid5b/Igf1/Sirt1/Wif1/Lpin1/Trib2/Id2/Zfp36l1/Id4/Msx2/Fgf10/Ero1a/Gdf10/Wnt5a/Ebf2/Trio/Retreg1/Zfpm2/Hes1/Snai2/Arl6/Osbpl11/Nr4a1/Noct/Vegfa/Pim1/Sox8/Psmb8/Atat1/Tcf7l2/Ddit3/Alox5/Tfap2b/Rgs2/Lamb3/Ccdc3/Nr4a2/Frzb/Itga6/Fbn1/Jag1/Bmp2/E2f1/Mecom/W…	154	ALL_DEGs
[truncated: 3,298 more rows]
