# Supplementary material for: Complex genetic architecture underlies human hand and foot evolution
Source: Research Square preprint supplement (doi:10.21203/rs.3.rs-7124496/v1), 2025-08-18
Supplement: Supplementary file 4 [file 8c1df2781eddb21fffbaa3dc.xlsx]

## Sheet: Samples and Sequencing Info
Sample	Rep	Date of Sample Collection	Sample	Index	Sequencing Submission #	Sequencing ID	Platform	Read Length	Sequencing Lane	Reads	# Reads/Sample	% Bases >= Q30	Barcode Primer	Description	Called Peaks
E15.5 Mouse	Replicate 1	2022-05-19	Hand phalanges 1	TAAGGCGA	SUB13180	220930_A00794_0710_BHNGWYDSX3_SUB13180	NovaSeq S4	2x100bp	2	63679787	63679787	89.11	AGATCGGAAGAGCACACGTCTGAACTCCAGTCA	ATAC-seq on pooled Mouse E15.5 skeletal tissue	105569
			Hand phalanges 3	CGTACTAG	SUB13180	220930_A00794_0710_BHNGWYDSX3_SUB13180	NovaSeq S4	2x100bp	2	57480342	57480342	89.73	AGATCGGAAGAGCACACGTCTGAACTCCAGTCA	ATAC-seq on pooled Mouse E15.5 skeletal tissue	96129
			Hand phalanges 5	AGGCAGAA	SUB13180	220930_A00794_0710_BHNGWYDSX3_SUB13180	NovaSeq S4	2x100bp	2	53471930	53471930	90.1	AGATCGGAAGAGCACACGTCTGAACTCCAGTCA	ATAC-seq on pooled Mouse E15.5 skeletal tissue	97254
			Metacarpal 1	TCCTGAGC	SUB13180	220930_A00794_0710_BHNGWYDSX3_SUB13180	NovaSeq S4	2x100bp	2	58554909	58554909	89.17	AGATCGGAAGAGCACACGTCTGAACTCCAGTCA	ATAC-seq on pooled Mouse E15.5 skeletal tissue	91932
			Metacarpal 3	GGACTCCT	SUB13180	220930_A00794_0710_BHNGWYDSX3_SUB13180	NovaSeq S4	2x100bp	2	57273685	57273685	90.76	AGATCGGAAGAGCACACGTCTGAACTCCAGTCA	ATAC-seq on pooled Mouse E15.5 skeletal tissue	109744
			Metacarpal 5	TAGGCATG	SUB13180	220930_A00794_0710_BHNGWYDSX3_SUB13180	NovaSeq S4	2x100bp	2	42797934	42797934	90.09	AGATCGGAAGAGCACACGTCTGAACTCCAGTCA	ATAC-seq on pooled Mouse E15.5 skeletal tissue	85836
			Foot phalanges 1	CTCTCTAC	SUB13180	220930_A00794_0710_BHNGWYDSX3_SUB13180	NovaSeq S4	2x100bp	2	66362390	66362390	89.92	AGATCGGAAGAGCACACGTCTGAACTCCAGTCA	ATAC-seq on pooled Mouse E15.5 skeletal tissue	103805
			Foot phalanges 3	CAGAGAGG	SUB13180	220930_A00794_0710_BHNGWYDSX3_SUB13180	NovaSeq S4	2x100bp	2	52261470	52261470	89.92	AGATCGGAAGAGCACACGTCTGAACTCCAGTCA	ATAC-seq on pooled Mouse E15.5 skeletal tissue	98209
			Foot phalanges 5	GCTACGCT	SUB13180	220930_A00794_0710_BHNGWYDSX3_SUB13180	NovaSeq S4	2x100bp	2	75426770	75426770	90.23	AGATCGGAAGAGCACACGTCTGAACTCCAGTCA	ATAC-seq on pooled Mouse E15.5 skeletal tissue	118959
			Metatarsal 1	CGAGGCTG	SUB13180	220930_A00794_0710_BHNGWYDSX3_SUB13180	NovaSeq S4	2x100bp	2	83616903	83616903	90.09	AGATCGGAAGAGCACACGTCTGAACTCCAGTCA	ATAC-seq on pooled Mouse E15.5 skeletal tissue	108752
			Metatarsal 3	AAGAGGCA	SUB13180	220930_A00794_0710_BHNGWYDSX3_SUB13180	NovaSeq S4	2x100bp	2	34989997	86597091	89.34	AGATCGGAAGAGCACACGTCTGAACTCCAGTCA	ATAC-seq on pooled Mouse E15.5 skeletal tissue	126433
					SUB13574	221222_A00794_0761_AHHTVMDSX5_SUB13574	NovaSeq S4	2x100bp	1	51607094		91.55	AGATCGGAAGAGCACACGTCTGAACTCCAGTCA	ATAC-seq on pooled Mouse E15.5 skeletal tissue
			Metatarsal 5	GTAGAGGA	SUB13180	220930_A00794_0710_BHNGWYDSX3_SUB13180	NovaSeq S4	2x100bp	2	48473304	48473304	86.28	AGATCGGAAGAGCACACGTCTGAACTCCAGTCA	ATAC-seq on pooled Mouse E15.5 skeletal tissue	89006
E15.5 Mouse	Replicate 2	2022-07-07	Hand phalanges 1	GTCGTGAT	SUB13180	220930_A00794_0710_BHNGWYDSX3_SUB13180	NovaSeq S4	2x100bp	2	39587479	128603016	89.53	AGATCGGAAGAGCACACGTCTGAACTCCAGTCA	ATAC-seq on pooled Mouse E15.5 skeletal tissue	254282
					SUB13550	221129_A00794_0742_AHGWKNDSX5_SUB13550	NovaSeq S4	2x100bp	3	89015537		91.07	AGATCGGAAGAGCACACGTCTGAACTCCAGTCA	ATAC-seq on pooled Mouse E15.5 skeletal tissue
			Hand phalanges 3	ACCACTGT	SUB13180	220930_A00794_0710_BHNGWYDSX3_SUB13180	NovaSeq S4	2x100bp	2	25983125	72305138	90.48	AGATCGGAAGAGCACACGTCTGAACTCCAGTCA	ATAC-seq on pooled Mouse E15.5 skeletal tissue	110655
					SUB13550	221129_A00794_0742_AHGWKNDSX5_SUB13550	NovaSeq S4	2x100bp	3	46322013		91.97	AGATCGGAAGAGCACACGTCTGAACTCCAGTCA	ATAC-seq on pooled Mouse E15.5 skeletal tissue
			Hand phalanges 5	TGGATCTG	SUB13180	220930_A00794_0710_BHNGWYDSX3_SUB13180	NovaSeq S4	2x100bp	2	18092101	55859135	88.44	AGATCGGAAGAGCACACGTCTGAACTCCAGTCA	ATAC-seq on pooled Mouse E15.5 skeletal tissue	87570
					SUB13550	221129_A00794_0742_AHGWKNDSX5_SUB13550	NovaSeq S4	2x100bp	3	37767034		90.1	AGATCGGAAGAGCACACGTCTGAACTCCAGTCA	ATAC-seq on pooled Mouse E15.5 skeletal tissue
			Metacarpal 1	CCGTTTGT	SUB13180	220930_A00794_0710_BHNGWYDSX3_SUB13180	NovaSeq S4	2x100bp	2	14220264	47948489	90.04	AGATCGGAAGAGCACACGTCTGAACTCCAGTCA	ATAC-seq on pooled Mouse E15.5 skeletal tissue	235490
					SUB13550	221129_A00794_0742_AHGWKNDSX5_SUB13550	NovaSeq S4	2x100bp	3	33728225		91.52	AGATCGGAAGAGCACACGTCTGAACTCCAGTCA	ATAC-seq on pooled Mouse E15.5 skeletal tissue
			Metacarpal 3	TGCTGGGT	SUB13180	220930_A00794_0710_BHNGWYDSX3_SUB13180	NovaSeq S4	2x100bp	2	169573892	169573892	89.33	AGATCGGAAGAGCACACGTCTGAACTCCAGTCA	ATAC-seq on pooled Mouse E15.5 skeletal tissue	135043
			Metacarpal 5	GAGGGGTT	SUB13180	220930_A00794_0710_BHNGWYDSX3_SUB13180	NovaSeq S4	2x100bp	2	27379503	82423373	88.94	AGATCGGAAGAGCACACGTCTGAACTCCAGTCA	ATAC-seq on pooled Mouse E15.5 skeletal tissue	91234
					SUB13550	221129_A00794_0742_AHGWKNDSX5_SUB13550	NovaSeq S4	2x100bp	3	55043870		90.39	AGATCGGAAGAGCACACGTCTGAACTCCAGTCA	ATAC-seq on pooled Mouse E15.5 skeletal tissue
			Foot phalanges 1	AGGTTGGG	SUB13180	220930_A00794_0710_BHNGWYDSX3_SUB13180	NovaSeq S4	2x100bp	2	13695965	51329881	90.46	AGATCGGAAGAGCACACGTCTGAACTCCAGTCA	ATAC-seq on pooled Mouse E15.5 skeletal tissue	130319
					SUB13550	221129_A00794_0742_AHGWKNDSX5_SUB13550	NovaSeq S4	2x100bp	3	37633916		92.05	AGATCGGAAGAGCACACGTCTGAACTCCAGTCA	ATAC-seq on pooled Mouse E15.5 skeletal tissue
			Foot phalanges 3	GTGTGGTG	SUB13180	220930_A00794_0710_BHNGWYDSX3_SUB13180	NovaSeq S4	2x100bp	2	39686614	95678744	88.48	AGATCGGAAGAGCACACGTCTGAACTCCAGTCA	ATAC-seq on pooled Mouse E15.5 skeletal tissue	114453
					SUB13550	221129_A00794_0742_AHGWKNDSX5_SUB13550	NovaSeq S4	2x100bp	3	55992130		89.97	AGATCGGAAGAGCACACGTCTGAACTCCAGTCA	ATAC-seq on pooled Mouse E15.5 skeletal tissue
			Foot phalanges 5	TGGGTTTC	SUB13180	220930_A00794_0710_BHNGWYDSX3_SUB13180	NovaSeq S4	2x100bp	2	20145568	52625436	89.61	AGATCGGAAGAGCACACGTCTGAACTCCAGTCA	ATAC-seq on pooled Mouse E15.5 skeletal tissue	110700
					SUB13550	221129_A00794_0742_AHGWKNDSX5_SUB13550	NovaSeq S4	2x100bp	3	32479868		91	AGATCGGAAGAGCACACGTCTGAACTCCAGTCA	ATAC-seq on pooled Mouse E15.5 skeletal tissue
			Metatarsal 1	TGGTCACA	SUB13180	220930_A00794_0710_BHNGWYDSX3_SUB13180	NovaSeq S4	2x100bp	2	33208684	72472221	89.02	AGATCGGAAGAGCACACGTCTGAACTCCAGTCA	ATAC-seq on pooled Mouse E15.5 skeletal tissue	117201
					SUB13550	221129_A00794_0742_AHGWKNDSX5_SUB13550	NovaSeq S4	2x100bp	3	39263537		90.32	AGATCGGAAGAGCACACGTCTGAACTCCAGTCA	ATAC-seq on pooled Mouse E15.5 skeletal tissue
			Metatarsal 3	TTGACCCT	SUB13180	220930_A00794_0710_BHNGWYDSX3_SUB13180	NovaSeq S4	2x100bp	2	31358298	69204612	88.99	AGATCGGAAGAGCACACGTCTGAACTCCAGTCA	ATAC-seq on pooled Mouse E15.5 skeletal tissue	102925
					SUB13550	221129_A00794_0742_AHGWKNDSX5_SUB13550	NovaSeq S4	2x100bp	3	37846314		90.52	AGATCGGAAGAGCACACGTCTGAACTCCAGTCA	ATAC-seq on pooled Mouse E15.5 skeletal tissue
			Metatarsal 5	CCACTCCT	SUB13180	220930_A00794_0710_BHNGWYDSX3_SUB13180	NovaSeq S4	2x100bp	2	20243271	57948771	89.44	AGATCGGAAGAGCACACGTCTGAACTCCAGTCA	ATAC-seq on pooled Mouse E15.5 skeletal tissue	96296
					SUB13550	221129_A00794_0742_AHGWKNDSX5_SUB13550	NovaSeq S4	2x100bp	3	37705500		90.8	AGATCGGAAGAGCACACGTCTGAACTCCAGTCA	ATAC-seq on pooled Mouse E15.5 skeletal tissue
E15.5 Mouse	Replicate 3	2022-10-28	Hand phalanges 1	TAAGGCGA	SUB13574	221222_A00794_0761_AHHTVMDSX5_SUB13574	NovaSeq S4	2x100bp	1	45174172	45174172	92.39	AGATCGGAAGAGCACACGTCTGAACTCCAGTCA	ATAC-seq on pooled Mouse E15.5 skeletal tissue	90975
			Hand phalanges 3	CGTACTAG	SUB13574	221222_A00794_0761_AHHTVMDSX5_SUB13574	NovaSeq S4	2x100bp	1	92643161	92643161	93.05	AGATCGGAAGAGCACACGTCTGAACTCCAGTCA	ATAC-seq on pooled Mouse E15.5 skeletal tissue	220521
			Hand phalanges 5	AGGCAGAA	SUB13574	221222_A00794_0761_AHHTVMDSX5_SUB13574	NovaSeq S4	2x100bp	1	83730269	83730269	92.34	AGATCGGAAGAGCACACGTCTGAACTCCAGTCA	ATAC-seq on pooled Mouse E15.5 skeletal tissue	120269
			Metacarpal 1	TCCTGAGC	SUB13574	221222_A00794_0761_AHHTVMDSX5_SUB13574	NovaSeq S4	2x100bp	1	43879903	43879903	92.56	AGATCGGAAGAGCACACGTCTGAACTCCAGTCA	ATAC-seq on pooled Mouse E15.5 skeletal tissue	72763
			Metacarpal 3	GGACTCCT	SUB13574	221222_A00794_0761_AHHTVMDSX5_SUB13574	NovaSeq S4	2x100bp	1	41889190	41889190	93.41	AGATCGGAAGAGCACACGTCTGAACTCCAGTCA	ATAC-seq on pooled Mouse E15.5 skeletal tissue	75932
			Metacarpal 5	TAGGCATG	SUB13574	221222_A00794_0761_AHHTVMDSX5_SUB13574	NovaSeq S4	2x100bp	1	42612311	42612311	92.81	AGATCGGAAGAGCACACGTCTGAACTCCAGTCA	ATAC-seq on pooled Mouse E15.5 skeletal tissue	98839
			Foot phalanges 1	AGGTTGGG	SUB13574	221222_A00794_0761_AHHTVMDSX5_SUB13574	NovaSeq S4	2x100bp	1	64966241	64966241	92.89	AGATCGGAAGAGCACACGTCTGAACTCCAGTCA	ATAC-seq on pooled Mouse E15.5 skeletal tissue	153880
			Foot phalanges 3	GTGTGGTG	SUB13574	221222_A00794_0761_AHHTVMDSX5_SUB13574	NovaSeq S4	2x100bp	1	74005205	74005205	92.16	AGATCGGAAGAGCACACGTCTGAACTCCAGTCA	ATAC-seq on pooled Mouse E15.5 skeletal tissue	97241
			Foot phalanges 5	TGGGTTTC	SUB13574	221222_A00794_0761_AHHTVMDSX5_SUB13574	NovaSeq S4	2x100bp	1	45887498	45887498	93.21	AGATCGGAAGAGCACACGTCTGAACTCCAGTCA	ATAC-seq on pooled Mouse E15.5 skeletal tissue	56825
			Metatarsal 1	TGGTCACA	SUB13574	221222_A00794_0761_AHHTVMDSX5_SUB13574	NovaSeq S4	2x100bp	1	113490531	113490531	92.01	AGATCGGAAGAGCACACGTCTGAACTCCAGTCA	ATAC-seq on pooled Mouse E15.5 skeletal tissue	332397
			Metatarsal 3	TTGACCCT	SUB13574	221222_A00794_0761_AHHTVMDSX5_SUB13574	NovaSeq S4	2x100bp	1	47816485	47816485	91.59	AGATCGGAAGAGCACACGTCTGAACTCCAGTCA	ATAC-seq on pooled Mouse E15.5 skeletal tissue	105597
			Metatarsal 5	CCACTCCT	SUB13574	221222_A00794_0761_AHHTVMDSX5_SUB13574	NovaSeq S4	2x100bp	1	62326961	62326961	92.47	AGATCGGAAGAGCACACGTCTGAACTCCAGTCA	ATAC-seq on pooled Mouse E15.5 skeletal tissue	108030

## Sheet: Peak Counts
Tissue	Replicate 1 Peaks	Replicate 2 Peaks	Replicate 3 Peaks	IDR-called Peaks (p<0.05)	Brain-filtered, IDR-called Peaks
Hand phalanges I	148276	386870	254443	38947	23117
Hand phalanges III	156277	176425	390919	44289	28020
Hand phalanges V	153714	204331	299122	36789	21166
Metacarpal I	140652	365654	165157	36194	20768
Metacarpal III	143121	274217	197624	53276	36565
Metacarpal V	140419	174342	284633	38250	22755
Foot phalanges I	177849	250072	377536	39121	23117
Foot phalanges III	161023	183480	152250	47375	30602
Foot phalanges V	225992	180011	157597	39937	23815
Metatarsal I	163085	182435	477455	46582	30081
Metatarsal III	287080	147400	171238	44292	27986
Metatarsal V	167237	153968	217735	36700	21027

## Sheet: All Elements GREAT
ID	name	Binom_Genome_Fraction	Binom_Expected	Binom_Observed_Region_Hits	Binom_Fold_Enrichment	Binom_Region_Set_Coverage	Binom_Raw_PValue	Binom_Adjp_BH	Hyper_Total_Genes	Hyper_Expected	Hyper_Observed_Gene_Hits	Hyper_Fold_Enrichment	Hyper_Gene_Set_Coverage	Hyper_Term_Gene_Coverage	Hyper_Raw_PValue	Hyper_Adjp_BH	Ontology
GO:0035412	regulation of catenin import into nucleus	0.00381008	193.053	418	2.16521	0.00824962	6.22547e-45	1.44233e-43	26	18.3695	24	1.30651	0.00158772	0.923077	0.00808064	0.0463928	GO Biological Process
GO:0061037	negative regulation of cartilage development	0.00376773	190.907	392	2.05335	0.00773649	1.84314e-37	3.6891e-36	26	18.3695	26	1.41539	0.00172003	1	0.000118713	0.00117279	GO Biological Process
GO:0072273	metanephric nephron morphogenesis	0.00339591	172.067	361	2.09802	0.00712467	2.12327e-36	4.20479e-35	20	14.1304	20	1.41539	0.0013231	1	0.000956949	0.00746067	GO Biological Process
GO:0048103	somatic stem cell division	0.00343471	174.033	357	2.05133	0.00704573	3.41269e-34	6.34547e-33	24	16.9565	23	1.35641	0.00152157	0.958333	0.00261482	0.0179101	GO Biological Process
GO:0010719	negative regulation of epithelial to mesenchymal transition	0.00283757	143.777	299	2.07961	0.00590104	7.53934e-30	1.20796e-28	26	18.3695	25	1.36095	0.00165388	0.961538	0.00140294	0.010393	GO Biological Process
GO:0032331	negative regulation of chondrocyte differentiation	0.00315086	159.651	320	2.00438	0.0063155	3.47151e-29	5.46835e-28	21	14.8369	21	1.41539	0.00138926	1	0.000675841	0.00549829	GO Biological Process
GO:0060216	definitive hemopoiesis	0.00238048	120.617	255	2.11413	0.00503266	1.11792e-26	1.5993e-25	21	14.8369	20	1.34799	0.0013231	0.952381	0.00657911	0.0391813	GO Biological Process
GO:2000737	negative regulation of stem cell differentiation	0.002429	123.075	258	2.09628	0.00509187	1.81334e-26	2.55508e-25	24	16.9565	23	1.35641	0.00152157	0.958333	0.00261482	0.0179101	GO Biological Process
GO:1902895	positive regulation of pri-miRNA transcription from RNA polymerase II promoter	0.00247628	125.47	254	2.02438	0.00501293	4.37901e-24	5.66976e-23	22	15.5434	21	1.35105	0.00138926	0.954546	0.00484519	0.0303898	GO Biological Process
GO:1903055	positive regulation of extracellular matrix organization	0.00215785	109.336	222	2.03044	0.00438138	2.03407e-21	2.36465e-20	17	12.0108	17	1.41539	0.00112464	1	0.00271626	0.0183372	GO Biological Process
GO:0003272	endocardial cushion formation	0.0016219	82.18	175	2.12947	0.00345379	3.77814e-19	3.96281e-18	17	12.0108	17	1.41539	0.00112464	1	0.00271626	0.0183372	GO Biological Process
GO:0000305	response to oxygen radical	0.000968947	49.0956	112	2.28126	0.00221042	1.01815e-14	8.48889e-14	21	14.8369	20	1.34799	0.0013231	0.952381	0.00657911	0.0391813	GO Biological Process
GO:0090200	positive regulation of release of cytochrome c from mitochondria	0.00125683	63.6822	131	2.05709	0.00258541	1.01268e-13	7.85772e-13	29	20.4891	27	1.31777	0.00178619	0.931034	0.00348482	0.0229228	GO Biological Process
GO:0034123	positive regulation of toll-like receptor signaling pathway	0.00100845	51.0971	112	2.19191	0.00221042	1.24948e-13	9.64369e-13	22	15.5434	21	1.35105	0.00138926	0.954546	0.00484519	0.0303898	GO Biological Process
GO:0019886	antigen processing and presentation of exogenous peptide antigen via MHC class II	0.000275047	13.9363	36	2.58317	0.000710494	5.83068e-07	2.45413e-06	14	9.89128	14	1.41539	0.000926171	1	0.00770862	0.0446091	GO Biological Process
GO:0031258	lamellipodium membrane	0.00147242	74.6063	155	2.07757	0.00305907	2.82743e-16	3.17197e-15	23	16.25	23	1.41539	0.00152157	1	0.000337078	0.00306422	GO Cellular Component
GO:0017147	Wnt-protein binding	0.00355973	180.368	365	2.02364	0.00720362	8.17844e-34	3.55633e-32	31	21.9021	29	1.32407	0.0019185	0.935484	0.00196827	0.0326543	GO Molecular Function
GO:0050431	transforming growth factor beta binding	0.0019123	96.8946	204	2.10538	0.00402613	1.69344e-21	5.18193e-20	17	12.0108	17	1.41539	0.00112464	1	0.00271626	0.0426648	GO Molecular Function
HP:0001724	Aortic dilatation	0.00310754	157.456	323	2.05137	0.00637471	4.17827e-31	1.31925e-29	26	18.3695	25	1.36095	0.00165388	0.961538	0.00140294	0.022341	Human Phenotype
MP:0003073	abnormal metacarpal bone morphology	0.00695669	352.488	753	2.13624	0.0148612	2.85259e-77	7.84873e-76	44	31.0869	42	1.35105	0.00277851	0.954546	4.14019e-05	0.000281751	Mouse Phenotype
MP:0000141	abnormal vertebral body morphology	0.0075957	384.866	794	2.06305	0.0156703	4.74576e-75	1.26224e-73	65	45.9238	60	1.30651	0.0039693	0.923077	1.91955e-05	0.000141228	Mouse Phenotype
MP:0005503	abnormal tendon morphology	0.00482016	244.232	526	2.15369	0.0103811	1.92287e-55	3.79618e-54	38	26.8478	35	1.30365	0.00231543	0.921053	0.00136252	0.00611344	Mouse Phenotype
MP:0003826	abnormal Mullerian duct morphology	0.00502753	254.74	534	2.09626	0.010539	6.46512e-53	1.2356e-51	45	31.7934	40	1.25812	0.0026462	0.888889	0.00334483	0.0133723	Mouse Phenotype
MP:0003235	abnormal alisphenoid bone morphology	0.00493035	249.816	518	2.07353	0.0102232	4.29626e-50	7.66047e-49	33	23.3152	32	1.3725	0.00211696	0.969697	0.00015313	0.000890235	Mouse Phenotype
MP:0002657	chondrodystrophy	0.00417907	211.749	443	2.0921	0.00874302	5.50713e-44	8.61614e-43	27	19.076	26	1.36297	0.00172003	0.962963	0.00102565	0.00475915	Mouse Phenotype
MP:0000079	abnormal basioccipital bone morphology	0.00347794	176.224	383	2.17337	0.00755886	1.17624e-41	1.70129e-40	34	24.0217	32	1.33213	0.00211696	0.941176	0.000824313	0.0039464	Mouse Phenotype
MP:0000828	abnormal fourth ventricle morphology	0.00390427	197.826	415	2.09781	0.00819041	1.42226e-41	2.04784e-40	30	21.1956	28	1.32103	0.00185234	0.933333	0.00262152	0.0108055	Mouse Phenotype
MP:0004462	small basisphenoid bone	0.00243245	123.25	298	2.41786	0.00588131	1.23994e-40	1.75368e-39	17	12.0108	17	1.41539	0.00112464	1	0.00271626	0.0110626	Mouse Phenotype
MP:0006386	absent somites	0.0036753	186.224	385	2.0674	0.00759833	2.04973e-37	2.63793e-36	49	34.6195	45	1.29985	0.00297698	0.918367	0.000313967	0.00170422	Mouse Phenotype
MP:0000430	absent maxillary shelf	0.00179112	90.7541	231	2.54534	0.004559	5.3719e-35	6.38163e-34	14	9.89128	14	1.41539	0.000926171	1	0.00770862	0.0266558	Mouse Phenotype
MP:0010594	thick aortic valve	0.00352888	178.805	361	2.01896	0.00712467	2.81138e-33	3.14842e-32	25	17.663	23	1.30216	0.00152157	0.92	0.0106442	0.0352902	Mouse Phenotype
MP:0008023	abnormal styloid process morphology	0.00282937	143.362	308	2.14841	0.00607867	5.23614e-33	5.77604e-32	14	9.89128	14	1.41539	0.000926171	1	0.00770862	0.0266558	Mouse Phenotype
MP:0003719	abnormal pericyte morphology	0.00296744	150.357	306	2.03516	0.0060392	5.11342e-29	4.88145e-28	22	15.5434	22	1.41539	0.00145541	1	0.0004773	0.00246768	Mouse Phenotype
MP:0004459	small alisphenoid bone	0.00271469	137.551	285	2.07196	0.00562474	2.69758e-28	2.50526e-27	16	11.3043	16	1.41539	0.00105848	1	0.00384575	0.014878	Mouse Phenotype
MP:0004733	abnormal thoracic cavity morphology	0.00290486	147.186	298	2.02465	0.00588131	5.81301e-28	5.35189e-27	29	20.4891	28	1.36658	0.00185234	0.965517	0.00054628	0.00277193	Mouse Phenotype
MP:0004831	long incisors	0.00271555	137.594	282	2.04951	0.00556553	2.53196e-27	2.27638e-26	14	9.89128	14	1.41539	0.000926171	1	0.00770862	0.0266558	Mouse Phenotype
MP:0005275	abnormal skin tensile strength	0.00236841	120.005	253	2.10825	0.00499319	2.55005e-26	2.19773e-25	32	22.6087	29	1.28269	0.0019185	0.90625	0.00673555	0.0239484	Mouse Phenotype
MP:0004083	polysyndactyly	0.00272472	138.059	277	2.00639	0.00546685	1.46346e-25	1.22918e-24	19	13.4239	19	1.41539	0.00125695	1	0.00135495	0.00608807	Mouse Phenotype
MP:0004449	absent presphenoid bone	0.00260759	132.124	268	2.0284	0.00528923	1.96132e-25	1.63728e-24	13	9.18476	13	1.41539	0.000860016	1	0.0109134	0.0355308	Mouse Phenotype
MP:0004453	abnormal pterygoid bone morphology	0.00231146	117.119	244	2.08335	0.00481557	8.80381e-25	7.16198e-24	15	10.5978	15	1.41539	0.000992326	1	0.00544481	0.0198228	Mouse Phenotype
MP:0004469	abnormal zygomatic arch morphology	0.00255596	129.508	261	2.01532	0.00515108	1.92876e-24	1.54285e-23	18	12.7174	18	1.41539	0.00119079	1	0.00191846	0.00824841	Mouse Phenotype
MP:0013876	absent ductus venosus valve	0.00196073	99.3481	216	2.17417	0.00426296	2.78826e-24	2.21925e-23	23	16.25	22	1.35385	0.00145541	0.956522	0.00356219	0.0140247	Mouse Phenotype
MP:0008130	abnormal pituitary intermediate lobe morphology	0.00150102	76.055	179	2.35356	0.00353273	6.85086e-24	5.39449e-23	13	9.18476	13	1.41539	0.000860016	1	0.0109134	0.0355308	Mouse Phenotype
MP:0000431	absent palatine bone horizontal plate	0.00166704	84.4672	190	2.24939	0.00374983	4.03277e-23	3.04525e-22	12	8.47824	12	1.41539	0.000793861	1	0.0154503	0.047219	Mouse Phenotype
MP:0004665	abnormal stapedial artery morphology	0.00166706	84.4684	189	2.23752	0.00373009	9.14124e-23	6.76932e-22	20	14.1304	20	1.41539	0.0013231	1	0.000956949	0.00450481	Mouse Phenotype
MP:0010810	increased type II pneumocyte number	0.00232413	117.761	237	2.01254	0.00467742	2.78081e-22	2.01714e-21	22	15.5434	22	1.41539	0.00145541	1	0.0004773	0.00246768	Mouse Phenotype
MP:0004666	absent stapedial artery	0.00163433	82.8097	184	2.22196	0.00363141	6.72211e-22	4.79971e-21	19	13.4239	19	1.41539	0.00125695	1	0.00135495	0.00608807	Mouse Phenotype
MP:0002268	abnormal terminal bronchiole morphology	0.0019633	99.4785	206	2.0708	0.0040656	6.5327e-21	4.44883e-20	14	9.89128	14	1.41539	0.000926171	1	0.00770862	0.0266558	Mouse Phenotype
MP:0013821	abnormal cerebral artery morphology	0.00159573	80.8539	178	2.2015	0.003513	7.59398e-21	5.15325e-20	25	17.663	24	1.35877	0.00158772	0.96	0.00191661	0.00824841	Mouse Phenotype
MP:0001307	fused cornea and lens	0.00169814	86.0431	184	2.13846	0.00363141	3.16639e-20	2.08659e-19	12	8.47824	12	1.41539	0.000793861	1	0.0154503	0.047219	Mouse Phenotype
MP:0006433	abnormal articular cartilage morphology	0.00196089	99.3564	201	2.02302	0.00396692	2.15797e-19	1.35619e-18	17	12.0108	17	1.41539	0.00112464	1	0.00271626	0.0110626	Mouse Phenotype
MP:0013933	short Meckel's cartilage	0.00124523	63.0946	145	2.29814	0.00286171	8.07104e-19	4.88497e-18	12	8.47824	12	1.41539	0.000793861	1	0.0154503	0.047219	Mouse Phenotype
MP:0013840	absent segment of posterior cerebral artery	0.00132456	67.1141	151	2.2499	0.00298013	9.70246e-19	5.85388e-18	23	16.25	22	1.35385	0.00145541	0.956522	0.00356219	0.0140247	Mouse Phenotype
MP:0010667	abnormal umbilical vein morphology	0.00125065	63.3691	145	2.28818	0.00286171	1.15527e-18	6.93527e-18	12	8.47824	12	1.41539	0.000793861	1	0.0154503	0.047219	Mouse Phenotype
MP:0009022	abnormal brain meninges morphology	0.0018221	92.3242	187	2.02547	0.00369062	3.26892e-18	1.91671e-17	14	9.89128	14	1.41539	0.000926171	1	0.00770862	0.0266558	Mouse Phenotype
MP:0012251	abnormal diaphragm development	0.0015814	80.1281	168	2.09664	0.00331564	7.55433e-18	4.35477e-17	12	8.47824	12	1.41539	0.000793861	1	0.0154503	0.047219	Mouse Phenotype
MP:0009517	abnormal salivary gland duct morphology	0.00183825	93.1422	187	2.00768	0.00369062	7.58287e-18	4.36636e-17	14	9.89128	14	1.41539	0.000926171	1	0.00770862	0.0266558	Mouse Phenotype
MP:0011309	abnormal kidney arterial blood vessel morphology	0.00102387	51.8787	121	2.33236	0.00238805	1.96373e-16	1.0635e-15	15	10.5978	15	1.41539	0.000992326	1	0.00544481	0.0198228	Mouse Phenotype
MP:0009709	hydrometra	0.00159248	80.6894	163	2.02009	0.00321696	5.3558e-16	2.82856e-15	13	9.18476	13	1.41539	0.000860016	1	0.0109134	0.0355308	Mouse Phenotype
MP:0012730	abnormal internal carotid artery morphology	0.000954335	48.3552	112	2.31619	0.00221042	3.84551e-15	1.91875e-14	13	9.18476	13	1.41539	0.000860016	1	0.0109134	0.0355308	Mouse Phenotype
MP:0003994	abnormal dorsal spinal root morphology	0.00131009	66.3812	136	2.04877	0.00268409	4.67857e-14	2.20676e-13	12	8.47824	12	1.41539	0.000793861	1	0.0154503	0.047219	Mouse Phenotype
MP:0000923	abnormal roof plate morphology	0.00128741	65.232	133	2.03888	0.00262488	1.22523e-13	5.63208e-13	13	9.18476	13	1.41539	0.000860016	1	0.0109134	0.0355308	Mouse Phenotype
MP:0009482	ileum inflammation	0.000966667	48.9801	101	2.06206	0.00199333	5.18822e-11	1.99748e-10	14	9.89128	14	1.41539	0.000926171	1	0.00770862	0.0266558	Mouse Phenotype
MP:0004387	abnormal prechordal plate morphology	0.000672812	34.0907	72	2.11201	0.00142099	1.0479e-08	3.33233e-08	12	8.47824	12	1.41539	0.000793861	1	0.0154503	0.047219	Mouse Phenotype

## Sheet: All regions annotated mm10
chr	start	end	Number of peak sets containing peak	Metatarsal 1	Metatarsal 3	Metatarsal 5	Foot phalanges 1	Foot phalanges 3	Foot phalanges 5	Metacarpal 1	Metacarpal 3	Metacarpal 5	Hand phalanges 1	Hand phalanges 3	Hand phalanges 5
chr1	4255718	4260483	11	1	1	1	1	1	1	0	1	1	1	1	1
chr1	4412379	4412844	2	1	0	0	0	0	0	0	1	0	0	0	0
chr1	4490507	4495162	12	1	1	1	1	1	1	1	1	1	1	1	1
chr1	4495742	4498400	12	1	1	1	1	1	1	1	1	1	1	1	1
chr1	4520075	4521712	1	0	0	0	0	0	0	0	1	0	0	0	0
chr1	4543887	4544621	1	0	0	1	0	0	0	0	0	0	0	0	0
chr1	4559556	4561089	11	1	1	1	1	1	1	0	1	1	1	1	1
chr1	4615210	4617244	5	1	1	0	0	0	0	1	1	1	0	0	0
chr1	4670137	4672620	4	1	1	1	0	0	0	0	1	0	0	0	0
chr1	4687421	4689856	5	1	1	0	0	0	0	0	1	0	0	1	1
chr1	4744941	4746582	2	1	0	0	0	0	0	0	1	0	0	0	0
chr1	4768394	4772163	4	1	0	0	1	0	0	0	1	0	0	1	0
chr1	4873222	4875321	6	1	1	0	0	1	0	0	1	1	0	1	0
chr1	4879531	4881418	6	0	1	0	0	0	0	1	1	0	1	1	1
chr1	4910476	4911922	1	0	0	0	0	0	0	0	1	0	0	0	0
chr1	5071606	5073009	12	1	1	1	1	1	1	1	1	1	1	1	1
chr1	6279564	6280648	1	0	0	0	0	0	0	0	1	0	0	0	0
chr1	6281880	6283238	2	0	0	0	0	1	0	0	1	0	0	0	0
chr1	6752068	6752707	2	0	0	0	0	0	0	0	1	1	0	0	0
chr1	6760355	6761490	1	0	0	0	0	0	1	0	0	0	0	0	0
chr1	6866335	6867614	2	1	0	0	0	0	0	0	1	0	0	0	0
chr1	6905948	6907194	1	0	0	0	0	0	0	0	1	0	0	0	0
chr1	6916456	6917608	1	0	0	0	0	0	0	0	0	0	0	0	1
chr1	7138022	7139711	1	0	0	0	0	0	0	0	1	0	0	0	0
chr1	7177231	7179414	3	0	1	0	0	1	0	0	1	0	0	0	0
chr1	7776576	7778882	6	1	0	1	0	1	1	0	1	0	0	1	0
chr1	8688342	8689388	2	0	0	0	0	0	0	0	0	0	0	1	1
chr1	9468890	9470989	1	0	0	0	0	0	0	0	1	0	0	0	0
chr1	9547494	9550111	8	0	0	1	1	0	1	1	0	1	1	1	1
chr1	9553600	9554999	2	0	0	0	0	0	0	0	1	0	0	1	0
chr1	9569823	9571102	3	0	0	0	0	1	0	0	0	0	1	1	0
chr1	9611470	9613994	1	0	0	0	0	0	0	0	1	0	0	0	0
chr1	9626608	9628674	10	1	1	1	1	1	0	0	1	1	1	1	1
chr1	9637827	9639869	5	1	1	1	0	0	0	0	1	1	0	0	0
chr1	9695989	9697078	1	0	0	0	0	0	0	0	1	0	0	0	0
chr1	9755004	9756307	1	0	0	0	0	0	0	0	1	0	0	0	0
chr1	9787010	9788180	1	0	0	0	0	0	0	0	1	0	0	0	0
chr1	9804154	9808004	12	1	1	1	1	1	1	1	1	1	1	1	1
chr1	9822957	9824429	2	1	0	0	0	0	0	0	1	0	0	0	0
chr1	9873905	9875309	12	1	1	1	1	1	1	1	1	1	1	1	1
chr1	9908212	9909562	7	1	1	0	0	1	0	1	1	0	1	1	0
chr1	9917573	9918968	1	0	0	0	0	0	1	0	0	0	0	0	0
chr1	9950823	9954427	10	1	1	1	1	1	1	0	1	0	1	1	1
chr1	9972388	9973959	1	0	0	0	0	1	0	0	0	0	0	0	0
chr1	10088425	10090474	10	1	1	0	1	1	0	1	1	1	1	1	1
chr1	10100098	10102427	7	1	0	0	1	1	1	0	0	0	1	1	1
chr1	10165299	10166171	1	0	0	0	0	0	0	0	1	0	0	0	0
chr1	10237514	10237736	1	0	0	0	0	0	0	0	0	0	0	1	0
chr1	10256172	10258595	10	1	1	1	0	1	0	1	1	1	1	1	1
chr1	10259401	10260752	2	0	1	0	0	1	0	0	0	0	0	0	0
chr1	10284665	10285918	3	1	0	1	0	0	0	0	1	0	0	0	0
chr1	10377308	10379106	2	1	1	0	0	0	0	0	0	0	0	0	0
chr1	10485021	10487680	3	1	0	1	0	1	0	0	0	0	0	0	0
chr1	10564219	10565381	1	0	0	0	0	0	1	0	0	0	0	0	0
chr1	10590829	10594710	7	1	1	0	0	1	1	0	1	0	0	1	1
chr1	10603240	10603961	1	0	0	0	0	0	0	0	1	0	0	0	0
chr1	10680569	10682732	4	0	0	0	0	1	0	0	1	0	0	1	1
chr1	10699429	10700919	3	0	0	0	1	1	1	0	0	0	0	0	0
chr1	10717633	10722271	12	1	1	1	1	1	1	1	1	1	1	1	1
chr1	10759236	10760108	3	0	0	0	0	0	1	0	0	0	0	1	1
chr1	10777325	10779807	5	1	0	0	0	1	0	0	0	0	1	1	1
chr1	10792653	10793264	2	1	0	0	0	0	0	0	0	0	1	0	0
chr1	10832522	10834095	1	0	0	0	0	0	1	0	0	0	0	0	0
chr1	10835301	10835974	1	0	0	0	0	0	0	0	1	0	0	0	0
chr1	10871693	10873365	1	0	0	0	0	0	0	0	1	0	0	0	0
chr1	10879372	10880762	6	1	1	1	0	0	0	1	1	1	0	0	0
chr1	11025442	11027743	2	1	1	0	0	0	0	0	0	0	0	0	0
chr1	11033137	11035341	3	1	0	0	0	0	0	1	1	0	0	0	0
chr1	11097277	11098136	3	0	0	0	0	0	0	0	1	0	0	1	1
chr1	11145407	11146608	1	0	0	0	0	0	0	0	1	0	0	0	0
chr1	11213682	11215230	6	1	0	0	0	1	1	0	1	0	0	1	1
chr1	11564761	11566547	3	1	1	0	0	0	0	0	1	0	0	0	0
chr1	11567730	11569003	1	0	0	0	0	0	0	1	0	0	0	0	0
chr1	11572826	11574289	8	1	1	0	1	1	1	1	0	0	1	1	0
chr1	11782790	11783750	3	0	0	0	1	0	0	0	0	0	0	1	1
chr1	11805228	11805806	1	0	0	0	0	0	1	0	0	0	0	0	0
chr1	12178011	12180532	9	1	1	1	1	1	0	1	1	1	1	0	0
chr1	12188681	12193973	12	1	1	1	1	1	1	1	1	1	1	1	1
chr1	12275548	12276943	9	1	1	0	0	1	0	1	1	1	1	1	1
chr1	12285132	12286527	4	0	1	1	0	0	0	0	1	1	0	0	0
chr1	12287646	12288188	1	0	0	0	0	0	0	0	1	0	0	0	0
chr1	12291132	12293076	4	0	0	1	0	1	0	0	0	0	1	1	0
chr1	12308610	12309723	4	0	0	0	0	1	0	0	1	1	0	1	0
chr1	12310142	12311073	1	0	0	0	0	0	0	0	1	0	0	0	0
chr1	12333615	12335989	6	1	0	0	1	1	1	0	0	0	1	1	0
chr1	12397402	12399036	4	1	1	0	0	1	0	0	1	0	0	0	0
chr1	12400990	12402326	4	1	1	0	0	0	0	0	1	1	0	0	0
chr1	12433722	12434188	1	0	0	0	0	0	0	0	1	0	0	0	0
chr1	12488190	12492009	9	1	1	1	1	1	0	0	1	1	1	1	0
chr1	12497827	12502433	12	1	1	1	1	1	1	1	1	1	1	1	1
chr1	12507835	12512543	12	1	1	1	1	1	1	1	1	1	1	1	1
chr1	12541303	12543101	2	0	0	0	0	1	1	0	0	0	0	0	0
chr1	12571301	12573784	8	1	1	1	0	1	1	1	1	1	0	0	0
chr1	12610957	12617833	12	1	1	1	1	1	1	1	1	1	1	1	1
chr1	12619327	12621767	9	1	1	1	0	1	0	1	1	1	1	1	0
chr1	12621993	12624646	9	1	1	1	0	1	0	0	1	1	1	1	1
chr1	12669913	12671462	3	1	0	0	0	1	1	0	0	0	0	0	0
chr1	12689492	12691186	3	0	0	0	1	0	0	0	1	0	0	1	0
chr1	12715079	12716593	2	0	0	0	0	0	0	0	1	0	0	1	0
chr1	12744268	12745320	1	0	1	0	0	0	0	0	0	0	0	0	0
chr1	12760410	12761502	2	0	0	0	0	0	0	0	1	0	0	1	0
chr1	12761949	12765999	5	1	1	0	0	0	0	1	1	1	0	0	0
chr1	12775432	12778690	6	1	1	0	0	1	0	0	1	1	0	1	0
chr1	12784387	12787570	12	1	1	1	1	1	1	1	1	1	1	1	1
chr1	12794912	12796088	2	0	0	0	0	0	0	1	1	0	0	0	0
chr1	12798789	12801782	10	1	1	1	0	1	0	1	1	1	1	1	1
chr1	12819773	12821736	2	0	0	0	0	0	0	0	1	1	0	0	0
chr1	12831441	12838184	12	1	1	1	1	1	1	1	1	1	1	1	1
chr1	12871313	12873917	4	1	1	0	0	1	0	0	1	0	0	0	0
chr1	12875096	12876462	6	1	0	0	0	1	1	0	1	0	1	1	0
chr1	12877133	12879336	5	1	0	1	0	0	1	1	1	0	0	0	0
chr1	12951921	12952798	2	0	0	0	0	0	1	0	0	0	0	1	0
chr1	12978792	12980291	2	0	0	0	0	0	0	0	1	0	0	1	0
chr1	12989453	12993743	12	1	1	1	1	1	1	1	1	1	1	1	1
chr1	12995730	12998320	4	1	1	1	0	0	0	0	1	0	0	0	0
chr1	13049373	13052661	11	1	1	1	1	1	1	1	1	1	0	1	1
chr1	13075724	13076772	2	0	0	0	0	0	0	0	1	0	0	1	0
chr1	13102738	13106512	11	1	1	1	0	1	1	1	1	1	1	1	1
chr1	13123991	13129287	12	1	1	1	1	1	1	1	1	1	1	1	1
chr1	13146294	13148924	3	0	0	0	0	0	0	0	1	1	0	1	0
chr1	13159453	13164414	5	1	0	0	0	1	0	0	1	1	0	1	0
chr1	13194065	13198733	12	1	1	1	1	1	1	1	1	1	1	1	1
chr1	13204689	13205826	1	0	0	0	0	0	0	0	0	0	1	0	0
chr1	13255987	13258449	3	0	0	0	0	0	0	1	1	0	1	0	0
chr1	13258968	13261236	3	1	0	0	0	1	0	0	1	0	0	0	0
chr1	13261448	13263506	2	0	1	0	0	0	0	0	1	0	0	0	0
chr1	13296302	13297580	1	0	0	0	0	1	0	0	0	0	0	0	0
chr1	13299918	13306741	5	1	0	0	0	1	0	1	1	1	0	0	0
chr1	13329087	13330783	2	0	0	0	0	0	0	0	1	0	0	1	0
chr1	13346359	13347448	1	0	0	0	0	0	0	0	1	0	0	0	0
chr1	13415053	13417736	6	0	1	0	0	1	0	1	1	1	1	0	0
chr1	13494153	13495353	1	1	0	0	0	0	0	0	0	0	0	0	0
chr1	13529241	13533477	10	1	1	1	0	1	0	1	1	1	1	1	1
chr1	13559480	13563343	4	0	0	1	0	0	0	1	1	0	1	0	0
chr1	13615610	13616924	1	0	0	0	0	0	0	0	1	0	0	0	0
chr1	13638826	13641397	12	1	1	1	1	1	1	1	1	1	1	1	1
chr1	13642602	13643902	5	1	1	1	0	0	0	0	1	1	0	0	0
chr1	13655360	13656381	1	0	0	0	0	0	0	0	1	0	0	0	0
chr1	13668450	13670240	4	1	0	1	0	1	0	0	0	0	0	0	1
chr1	13705837	13707251	9	1	1	1	1	1	1	0	1	1	1	0	0
chr1	13752304	13752974	1	0	0	0	0	0	0	0	1	0	0	0	0
chr1	13770956	13772243	3	0	1	1	0	1	0	0	0	0	0	0	0
chr1	13781494	13785728	9	1	1	1	0	1	1	0	1	1	1	1	0
chr1	13873190	13874782	3	0	1	0	0	0	0	0	1	1	0	0	0
chr1	13988980	13990380	4	1	1	1	0	1	0	0	0	0	0	0	0
chr1	14000078	14003136	5	1	1	1	0	1	0	0	1	0	0	0	0
chr1	14010840	14012845	8	1	1	0	1	1	1	0	0	0	1	1	1
chr1	14113179	14114177	3	0	0	0	1	0	0	0	0	0	0	1	1
chr1	14149541	14152010	10	1	1	1	0	1	1	0	1	1	1	1	1
chr1	14164713	14165471	1	1	0	0	0	0	0	0	0	0	0	0	0
chr1	14188560	14191128	3	0	0	0	0	1	0	0	1	0	0	1	0
chr1	14207472	14208621	1	0	1	0	0	0	0	0	0	0	0	0	0
chr1	14256865	14257831	3	1	1	0	0	0	0	0	1	0	0	0	0
chr1	14267326	14269126	10	1	1	1	1	1	1	0	1	0	1	1	1
chr1	14296551	14297732	1	0	0	0	0	1	0	0	0	0	0	0	0
chr1	14355690	14358237	7	1	0	1	1	1	1	0	0	0	0	1	1
chr1	14460473	14463049	2	0	1	0	0	0	0	0	1	0	0	0	0
chr1	14484284	14484989	1	0	1	0	0	0	0	0	0	0	0	0	0
chr1	14492563	14493244	1	0	0	0	0	0	0	0	1	0	0	0	0
chr1	14503564	14505246	1	0	0	0	0	0	0	0	1	0	0	0	0
chr1	14510209	14513634	9	1	1	1	1	1	0	0	1	0	1	1	1
chr1	14634609	14636644	5	1	1	0	0	0	0	0	1	1	1	0	0
chr1	14707466	14709413	7	1	1	1	0	1	0	0	1	1	0	1	0
chr1	14715653	14717444	11	1	1	1	1	1	1	0	1	1	1	1	1
chr1	14781252	14782003	1	0	0	0	0	0	0	0	1	0	0	0	0
chr1	14917993	14919948	11	1	1	1	1	1	1	0	1	1	1	1	1
chr1	14924913	14925358	1	0	0	0	0	1	0	0	0	0	0	0	0
chr1	14975119	14976211	7	1	1	0	1	0	1	0	1	0	0	1	1
chr1	15148039	15149370	2	0	0	0	0	0	0	0	1	1	0	0	0
chr1	15644337	15645383	4	1	1	1	0	0	0	0	1	0	0	0	0
chr1	15719422	15720207	2	1	0	0	0	0	0	0	1	0	0	0	0
chr1	15742281	15743500	2	0	0	0	0	0	1	0	0	0	0	1	0
chr1	15791557	15792750	1	0	0	0	0	0	0	0	1	0	0	0	0
chr1	15795985	15797857	5	1	1	1	0	1	1	0	0	0	0	0	0
chr1	15855157	15858538	11	1	1	1	1	1	1	0	1	1	1	1	1
chr1	15875651	15881663	5	0	0	0	1	1	1	0	0	0	0	1	1
chr1	15881759	15884247	5	0	0	0	0	0	1	0	1	1	1	1	0
chr1	15898602	15900657	7	1	0	0	1	1	1	0	0	0	1	1	1
chr1	15907333	15909309	9	1	1	1	1	1	1	1	1	0	0	1	0
chr1	15934104	15934825	1	0	0	0	0	0	0	0	0	0	0	0	1
chr1	15976605	15977695	2	0	0	0	0	0	1	0	0	0	0	1	0
chr1	15984862	15986480	3	0	0	0	0	1	1	0	1	0	0	0	0
chr1	15992709	15996041	12	1	1	1	1	1	1	1	1	1	1	1	1
chr1	16070224	16074979	11	1	1	1	1	1	1	0	1	1	1	1	1
chr1	16087054	16087803	2	0	0	0	1	0	0	0	0	0	0	0	1
chr1	16109255	16113841	3	1	0	1	0	0	0	0	0	1	0	0	0
chr1	16126025	16128577	2	0	0	0	0	0	0	0	1	0	0	1	0
chr1	16171818	16174026	3	0	1	1	0	0	0	0	1	0	0	0	0
chr1	16177472	16178222	2	0	1	0	0	0	0	0	1	0	0	0	0
chr1	16211377	16215723	11	1	1	0	1	1	1	1	1	1	1	1	1
chr1	16226679	16231950	12	1	1	1	1	1	1	1	1	1	1	1	1
chr1	16240358	16243882	10	1	1	1	1	1	1	0	1	0	1	1	1
chr1	16248119	16250679	10	1	1	1	1	1	1	0	1	0	1	1	1
chr1	16266989	16270090	12	1	1	1	1	1	1	1	1	1	1	1	1
chr1	16274822	16275527	1	0	0	0	0	0	1	0	0	0	0	0	0
chr1	16293166	16295270	2	0	0	0	0	1	0	0	1	0	0	0	0
chr1	16307614	16309756	3	1	0	1	0	0	0	0	1	0	0	0	0
chr1	16397670	16399536	3	0	0	0	1	1	1	0	0	0	0	0	0
chr1	16433212	16434038	1	0	0	0	0	0	0	0	1	0	0	0	0
chr1	16586083	16588416	6	1	0	0	1	1	1	0	0	0	1	1	0
chr1	16605879	16608047	7	1	1	1	1	1	1	0	1	0	0	0	0
chr1	16608075	16608842	1	0	0	0	0	0	0	0	1	0	0	0	0
chr1	16612273	16613421	2	0	0	0	0	1	0	0	1	0	0	0	0
chr1	16745492	16750224	2	1	0	0	0	0	0	0	0	0	0	1	0
chr1	16797493	16799571	10	1	1	1	1	1	0	1	1	1	0	1	1
chr1	16952908	16953923	7	0	0	0	0	1	1	0	1	1	1	1	1
chr1	16957241	16959632	9	1	1	1	0	1	0	1	1	1	0	1	1
chr1	17006136	17011412	10	1	1	1	0	1	1	1	1	1	0	1	1
chr1	17084186	17087134	6	1	1	0	0	1	0	1	1	1	0	0	0
chr1	17153765	17154980	3	1	0	1	0	1	0	0	0	0	0	0	0
chr1	17162924	17164361	1	0	0	0	0	0	0	0	1	0	0	0	0
chr1	17180675	17182575	7	0	1	1	0	0	0	1	1	1	0	1	1
chr1	17389307	17390308	2	0	0	0	0	0	0	0	0	0	0	1	1
chr1	17638860	17639922	1	0	0	0	0	0	0	0	1	0	0	0	0
chr1	17655726	17657130	1	0	0	0	0	0	0	0	1	0	0	0	0
chr1	17660726	17664860	5	1	1	0	0	0	0	0	1	1	0	1	0
chr1	17717256	17719563	7	1	1	1	0	1	0	1	1	1	0	0	0
chr1	17740059	17742897	8	1	1	1	0	1	0	0	1	1	0	1	1
chr1	17836489	17839160	10	1	1	1	0	1	0	1	1	1	1	1	1
chr1	17891025	17892541	1	0	0	0	0	0	0	0	1	0	0	0	0
chr1	17931227	17932603	2	0	0	0	0	0	0	0	1	1	0	0	0
chr1	17980210	17981252	2	0	0	0	0	1	0	0	1	0	0	0	0
chr1	18012776	18013311	1	0	0	0	0	0	0	0	1	0	0	0	0
chr1	18077917	18079354	2	0	0	0	0	0	0	0	0	0	0	1	1
chr1	18536995	18538621	6	0	0	0	1	0	1	0	1	0	1	1	1
chr1	19096889	19097197	1	0	0	0	0	0	0	0	1	0	0	0	0
chr1	19109618	19110595	5	0	1	0	1	1	1	0	1	0	0	0	0
chr1	19178456	19180212	5	1	1	0	0	0	0	0	1	1	0	1	0
chr1	19205258	19207932	12	1	1	1	1	1	1	1	1	1	1	1	1
chr1	19208410	19222498	12	1	1	1	1	1	1	1	1	1	1	1	1
chr1	19230449	19237852	12	1	1	1	1	1	1	1	1	1	1	1	1
chr1	19239965	19242820	12	1	1	1	1	1	1	1	1	1	1	1	1
chr1	19342477	19343924	3	1	1	0	0	1	0	0	0	0	0	0	0
chr1	19647314	19649247	4	0	0	0	1	1	1	0	0	0	1	0	0
chr1	19672674	19674928	1	0	0	0	0	0	1	0	0	0	0	0	0
chr1	19731647	19734911	12	1	1	1	1	1	1	1	1	1	1	1	1
chr1	19767313	19769729	12	1	1	1	1	1	1	1	1	1	1	1	1
chr1	19798923	19799981	7	1	1	0	1	0	1	0	1	0	0	1	1
chr1	19849193	19850996	12	1	1	1	1	1	1	1	1	1	1	1	1
chr1	19852756	19853293	1	0	0	0	0	0	0	0	1	0	0	0	0
chr1	19856863	19858791	5	1	1	1	0	1	0	0	0	0	1	0	0
chr1	19862759	19863580	1	0	0	0	0	1	0	0	0	0	0	0	0
chr1	19895717	19896483	1	0	0	0	0	0	0	0	1	0	0	0	0
chr1	19950910	19952244	2	1	0	0	0	0	0	0	1	0	0	0	0
chr1	19998943	19999782	3	0	0	0	1	0	0	0	0	0	0	1	1
chr1	20134740	20136614	5	0	1	0	1	1	1	0	0	0	0	1	0
chr1	20283875	20284639	1	0	0	0	0	0	0	0	0	0	0	1	0
chr1	20310646	20312346	9	1	1	1	0	1	1	0	1	1	0	1	1
chr1	20465145	20467746	6	1	1	0	0	1	0	0	1	1	1	0	0
chr1	20470301	20472574	5	1	1	0	0	1	1	0	0	0	0	1	0
chr1	20486223	20488018	5	0	0	0	1	0	1	0	0	1	0	1	1
chr1	20493318	20495226	8	1	1	1	1	1	1	0	0	1	0	1	0
chr1	20550401	20553330	12	1	1	1	1	1	1	1	1	1	1	1	1
chr1	20612406	20613176	1	0	0	0	0	0	0	0	1	0	0	0	0
chr1	20743599	20744667	5	0	1	0	0	1	1	0	1	0	0	1	0
chr1	20785876	20788567	10	1	1	1	0	1	1	1	1	1	1	1	0
chr1	20870847	20871256	1	0	0	0	0	0	0	0	1	0	0	0	0
chr1	20920855	20921958	1	0	0	0	0	0	0	0	1	0	0	0	0
chr1	20932870	20935379	5	1	1	0	0	1	0	0	1	0	0	1	0
chr1	20939953	20943043	9	1	1	0	1	1	1	0	0	1	1	1	1
chr1	20988961	20990801	1	0	1	0	0	0	0	0	0	0	0	0	0
chr1	20996270	20999706	7	1	1	0	0	1	1	0	1	0	0	1	1
chr1	21006749	21010661	8	1	1	1	0	1	0	1	1	1	0	1	0
chr1	21012788	21015712	12	1	1	1	1	1	1	1	1	1	1	1	1
chr1	21024421	21025692	4	0	0	0	1	0	1	0	1	0	0	1	0
chr1	21037064	21043924	12	1	1	1	1	1	1	1	1	1	1	1	1
chr1	21051089	21055113	8	1	1	1	0	1	0	1	1	1	0	1	0
chr1	21069678	21072843	7	1	1	1	0	1	0	0	1	1	0	1	0
chr1	21085995	21087086	5	0	0	1	0	0	0	0	1	1	1	1	0
chr1	21088756	21091177	12	1	1	1	1	1	1	1	1	1	1	1	1
chr1	21100123	21104021	11	1	1	1	0	1	1	1	1	1	1	1	1
chr1	21124102	21125965	12	1	1	1	1	1	1	1	1	1	1	1	1
chr1	21146493	21148323	9	1	1	1	0	1	0	1	1	1	1	1	0
chr1	21160724	21163267	8	1	1	1	0	1	0	1	1	1	0	1	0
chr1	21211983	21215357	2	0	0	0	0	0	0	0	1	0	0	0	1
chr1	21243713	21244939	2	0	0	0	0	0	0	0	1	0	0	1	0
chr1	21256286	21257202	1	0	0	0	0	0	0	0	1	0	0	0	0
chr1	21270406	21273545	12	1	1	1	1	1	1	1	1	1	1	1	1
chr1	21498616	21501429	12	1	1	1	1	1	1	1	1	1	1	1	1
chr1	21531069	21533110	1	0	0	0	0	0	0	0	1	0	0	0	0
chr1	21538306	21539352	1	0	0	0	0	0	0	0	1	0	0	0	0
chr1	21602084	21603250	2	1	0	0	0	0	0	0	1	0	0	0	0
chr1	21613381	21614983	5	0	1	0	0	0	0	1	1	1	0	1	0
chr1	21631417	21633286	10	1	1	1	0	1	1	0	1	1	1	1	1
chr1	21664572	21666207	6	1	1	1	0	1	0	0	1	1	0	0	0
chr1	21712767	21713092	1	0	0	0	0	0	0	0	1	0	0	0	0
chr1	21745864	21747405	4	0	1	0	0	0	0	1	1	1	0	0	0
chr1	21792234	21793265	2	0	0	0	0	0	0	0	1	1	0	0	0
chr1	21835201	21837265	12	1	1	1	1	1	1	1	1	1	1	1	1
chr1	21940869	21946321	10	1	1	0	1	1	0	1	1	1	1	1	1
chr1	22069787	22072087	3	0	1	0	0	0	0	0	1	1	0	0	0
chr1	22191293	22193926	2	0	0	0	0	0	0	1	1	0	0	0	0
chr1	22200922	22202929	9	1	1	0	0	1	0	1	1	1	1	1	1
chr1	22206441	22207787	9	1	1	1	0	0	0	1	1	1	1	1	1
chr1	22268170	22270381	12	1	1	1	1	1	1	1	1	1	1	1	1
chr1	22292206	22293296	3	0	1	0	0	0	0	0	1	0	0	1	0
chr1	22307867	22308333	1	0	0	0	0	0	0	0	1	0	0	0	0
chr1	22320255	22321631	3	1	1	0	0	0	0	0	1	0	0	0	0
chr1	22604066	22605070	1	0	0	0	0	0	0	0	1	0	0	0	0
chr1	22633830	22635885	2	1	0	0	0	1	0	0	0	0	0	0	0
chr1	22638819	22641200	7	1	1	0	1	1	1	0	1	0	0	1	0
chr1	22655011	22656410	4	0	0	0	0	1	0	0	1	1	0	1	0
chr1	22800104	22800901	1	0	0	0	0	0	0	0	1	0	0	0	0
chr1	23172928	23174463	1	0	0	0	0	0	0	0	1	0	0	0	0
chr1	23187141	23188697	3	0	1	0	0	0	0	0	1	1	0	0	0
chr1	23270222	23272347	10	1	1	1	0	1	0	1	1	1	1	1	1
chr1	23479999	23481657	4	1	1	1	0	0	0	0	0	1	0	0	0
chr1	23556039	23557472	4	0	0	0	1	0	1	0	0	0	0	1	1
chr1	23589165	23590044	1	0	0	0	0	0	0	0	1	0	0	0	0
chr1	23644557	23645806	1	0	0	0	0	0	0	0	1	0	0	0	0
chr1	23825286	23829806	12	1	1	1	1	1	1	1	1	1	1	1	1
chr1	23855561	23856416	1	0	0	0	0	1	0	0	0	0	0	0	0
chr1	23923740	23924781	1	0	0	0	0	0	0	0	1	0	0	0	0
chr1	23933924	23935900	8	1	1	0	1	1	1	0	1	0	1	1	0
chr1	23948392	23950446	6	1	1	1	1	1	1	0	0	0	0	0	0
chr1	23958480	23960030	4	0	1	0	0	1	1	0	1	0	0	0	0
chr1	24010128	24012456	2	1	0	0	0	1	0	0	0	0	0	0	0
chr1	24020455	24022006	3	0	0	0	0	1	0	0	1	1	0	0	0
chr1	24101873	24103145	5	0	1	1	0	0	0	0	1	1	0	1	0
chr1	24107136	24108699	8	1	1	1	0	0	0	1	1	1	1	1	0
chr1	24136498	24138013	3	1	0	0	0	0	0	0	1	1	0	0	0
chr1	24168716	24170449	12	1	1	1	1	1	1	1	1	1	1	1	1
chr1	24170589	24172654	4	1	1	0	0	1	0	0	1	0	0	0	0
chr1	24175300	24181155	11	1	1	1	1	1	0	1	1	1	1	1	1
chr1	24186859	24187885	1	0	0	0	0	0	0	0	1	0	0	0	0
chr1	24193021	24198038	12	1	1	1	1	1	1	1	1	1	1	1	1
chr1	24210917	24213149	7	1	0	0	0	1	0	1	1	0	1	1	1
chr1	24217976	24220591	11	1	1	1	1	1	1	1	1	1	0	1	1
chr1	24221746	24222320	1	0	0	0	0	0	0	0	0	1	0	0	0
chr1	24226966	24228064	1	0	0	0	0	0	0	0	1	0	0	0	0
chr1	24228672	24232590	12	1	1	1	1	1	1	1	1	1	1	1	1
chr1	24235595	24241852	9	1	1	1	0	1	0	1	1	1	1	1	0
chr1	24244464	24246961	9	1	1	1	0	1	0	1	1	1	0	1	1
chr1	24250834	24252649	2	0	0	0	0	0	0	1	0	0	1	0	0
chr1	24378049	24379463	3	0	0	0	0	0	0	1	1	0	0	1	0
chr1	24548761	24552723	5	0	1	1	0	0	0	1	1	1	0	0	0
chr1	24633069	24634985	10	1	1	1	0	1	1	1	1	1	1	1	0
chr1	24697914	24699866	2	0	0	0	0	1	0	0	1	0	0	0	0
chr1	24951507	24952984	2	1	1	0	0	0	0	0	0	0	0	0	0
chr1	25041280	25043193	11	1	1	1	1	1	0	1	1	1	1	1	1
chr1	25104758	25107348	1	0	0	0	0	0	0	0	1	0	0	0	0
chr1	25262387	25263919	3	1	0	0	0	1	1	0	0	0	0	0	0
chr1	25469993	25470834	1	0	0	0	0	0	0	0	1	0	0	0	0
chr1	25510266	25511304	2	0	1	0	0	0	0	0	1	0	0	0	0
chr1	25541856	25544536	10	1	1	1	0	1	0	1	1	1	1	1	1
chr1	25662070	25663438	10	1	1	0	1	1	1	0	1	1	1	1	1
chr1	25814564	25816181	3	1	1	0	0	0	0	0	1	0	0	0	0
chr1	26282564	26283348	1	0	0	0	0	0	0	0	1	0	0	0	0
chr1	26288640	26290724	8	1	1	0	0	1	0	1	1	1	1	1	0
chr1	27139754	27140369	2	0	0	0	0	0	0	0	0	0	0	1	1
chr1	27159488	27160185	2	0	0	0	0	0	0	0	0	0	0	1	1
chr1	28053963	28054675	1	0	0	0	0	0	0	0	0	1	0	0	0
chr1	28287619	28288984	8	0	1	0	1	0	1	0	1	1	1	1	1
chr1	28328455	28329361	2	0	1	0	0	0	0	0	1	0	0	0	0
chr1	28855350	28856200	2	0	0	0	1	0	0	0	0	0	0	0	1
chr1	28931512	28932163	1	0	0	0	0	0	0	0	1	0	0	0	0
chr1	30017449	30018461	2	1	0	1	0	0	0	0	0	0	0	0	0
chr1	30041911	30043419	5	0	0	0	1	0	1	0	0	1	0	1	1
chr1	30066790	30067720	2	0	0	0	0	0	0	0	0	0	0	1	1
chr1	30370793	30371845	1	0	0	0	0	0	0	0	0	0	0	1	0
chr1	30549718	30550795	4	1	1	0	0	1	0	0	1	0	0	0	0
chr1	30594091	30596350	12	1	1	1	1	1	1	1	1	1	1	1	1
chr1	30700505	30701262	1	0	0	0	0	0	0	0	1	0	0	0	0
chr1	30792370	30794519	3	0	1	0	0	1	0	0	0	1	0	0	0
chr1	31015329	31016763	1	0	0	0	0	0	0	0	1	0	0	0	0
chr1	31039927	31041899	7	1	1	0	0	0	0	1	1	1	0	1	1
chr1	31049518	31050822	2	0	0	0	0	0	0	0	1	1	0	0	0
chr1	31058313	31060086	3	1	0	1	0	0	0	0	1	0	0	0	0
chr1	31074942	31076190	3	0	0	0	0	0	1	0	0	0	0	1	1
chr1	31133289	31134325	1	0	0	0	0	0	0	0	0	0	0	1	0
chr1	31142072	31143854	7	0	1	0	0	0	0	1	1	1	1	1	1
chr1	31153829	31154804	3	1	0	0	0	0	0	0	1	1	0	0	0
chr1	31156866	31157699	2	0	0	0	0	0	0	0	1	1	0	0	0
chr1	31164072	31165232	1	0	0	0	0	0	0	0	1	0	0	0	0
chr1	31234433	31235592	1	0	0	0	0	0	0	0	1	0	0	0	0
chr1	31791370	31794826	8	1	1	1	0	1	0	0	1	1	0	1	1
chr1	31957642	31965874	11	1	1	1	1	1	1	0	1	1	1	1	1
chr1	32073208	32074509	5	0	0	0	1	0	1	0	0	1	0	1	1
chr1	32719951	32720724	1	0	0	0	0	0	0	0	1	0	0	0	0
chr1	32852872	32854313	1	1	0	0	0	0	0	0	0	0	0	0	0
chr1	32857001	32859133	5	1	1	1	0	1	1	0	0	0	0	0	0
chr1	33019404	33020163	1	0	0	0	0	0	0	0	0	0	0	1	0
chr1	33406709	33409075	10	1	1	0	1	1	1	0	1	1	1	1	1
chr1	33460091	33462484	3	1	0	0	0	0	0	0	0	0	1	0	1
chr1	33466491	33468977	8	1	0	0	0	1	0	1	1	1	1	1	1
chr1	33528066	33528940	1	0	0	0	0	0	0	0	0	0	0	1	0
chr1	33567463	33570505	1	0	0	0	0	0	0	0	0	1	0	0	0
chr1	33582940	33585998	11	1	1	1	1	1	1	1	1	1	1	1	0
chr1	33657495	33657870	1	0	0	0	0	0	0	0	1	0	0	0	0
chr1	33671111	33674409	8	0	1	1	1	0	0	1	1	1	0	1	1
chr1	33682247	33684089	4	1	0	0	1	1	0	0	0	0	0	1	0
chr1	33687137	33690216	6	1	1	1	0	1	1	0	1	0	0	0	0
chr1	33695747	33699006	12	1	1	1	1	1	1	1	1	1	1	1	1
chr1	33710854	33712797	4	1	1	0	0	0	0	0	1	0	0	1	0
chr1	33714220	33715469	7	1	0	0	1	1	1	1	1	0	1	0	0
chr1	33741842	33743389	1	0	0	0	0	0	0	0	1	0	0	0	0
chr1	33752590	33755543	2	0	0	0	0	0	0	0	1	0	1	0	0
chr1	33768292	33770564	2	0	0	0	0	0	0	0	1	0	0	1	0
chr1	33883111	33883849	3	1	0	0	0	1	0	0	1	0	0	0	0
chr1	33898113	33901693	11	1	1	1	0	1	1	1	1	1	1	1	1
chr1	33902647	33904542	2	1	0	0	0	0	0	0	1	0	0	0	0
chr1	33926082	33927642	4	0	1	0	0	1	0	0	1	1	0	0	0
chr1	33944058	33946161	12	1	1	1	1	1	1	1	1	1	1	1	1
chr1	33989142	33990345	1	0	0	0	0	0	0	0	1	0	0	0	0
chr1	33993705	33994833	2	1	1	0	0	0	0	0	0	0	0	0	0
chr1	34015976	34022801	12	1	1	1	1	1	1	1	1	1	1	1	1
chr1	34027120	34027842	2	0	0	0	0	0	0	0	1	1	0	0	0
chr1	34029349	34030777	3	0	0	0	0	0	0	1	1	1	0	0	0
chr1	34039881	34041706	4	1	0	0	0	0	0	0	1	0	1	1	0
chr1	34042850	34046302	12	1	1	1	1	1	1	1	1	1	1	1	1
chr1	34060371	34061699	2	1	0	0	0	0	0	0	1	0	0	0	0
chr1	34067638	34070796	1	0	0	0	0	0	0	0	1	0	0	0	0
chr1	34072141	34075529	12	1	1	1	1	1	1	1	1	1	1	1	1
chr1	34076311	34078317	5	0	0	0	1	1	0	0	1	1	1	0	0
chr1	34096802	34098088	1	1	0	0	0	0	0	0	0	0	0	0	0
chr1	34103215	34106317	11	1	1	1	1	1	1	1	1	0	1	1	1
chr1	34108916	34113603	8	1	1	0	0	1	1	1	1	0	1	1	0
chr1	34113810	34117908	5	1	0	0	0	1	0	1	1	0	1	0	0
chr1	34119690	34122485	12	1	1	1	1	1	1	1	1	1	1	1	1
chr1	34127273	34128872	12	1	1	1	1	1	1	1	1	1	1	1	1
chr1	34136265	34141850	12	1	1	1	1	1	1	1	1	1	1	1	1
chr1	34164578	34165065	1	0	0	0	0	0	0	0	0	1	0	0	0
chr1	34218042	34220681	12	1	1	1	1	1	1	1	1	1	1	1	1
chr1	34223959	34224994	1	0	0	0	0	0	0	0	1	0	0	0	0
chr1	34233802	34241713	12	1	1	1	1	1	1	1	1	1	1	1	1
chr1	34252109	34256107	9	1	1	0	0	1	0	1	1	1	1	1	1
chr1	34381214	34382803	1	0	0	0	0	1	0	0	0	0	0	0	0
chr1	34417590	34418363	1	0	0	0	0	0	0	0	0	0	0	1	0
chr1	34470751	34474468	12	1	1	1	1	1	1	1	1	1	1	1	1
chr1	34505091	34505982	1	0	0	0	0	0	0	0	1	0	0	0	0
chr1	34535037	34539228	12	1	1	1	1	1	1	1	1	1	1	1	1
chr1	34642193	34643123	2	0	0	0	0	0	0	0	1	0	0	1	0
chr1	34665605	34667309	3	0	1	0	0	0	1	0	1	0	0	0	0
chr1	34674617	34680549	12	1	1	1	1	1	1	1	1	1	1	1	1
chr1	34700057	34702045	4	0	0	0	0	1	0	0	1	1	0	1	0
chr1	34793168	34794228	1	1	0	0	0	0	0	0	0	0	0	0	0
chr1	34813493	34816205	1	0	0	0	0	0	0	0	0	0	1	0	0
chr1	34849014	34853465	12	1	1	1	1	1	1	1	1	1	1	1	1
chr1	34866867	34868653	9	1	1	0	1	1	0	0	1	1	1	1	1
chr1	34879632	34880575	1	0	0	0	0	0	0	0	0	0	0	1	0
chr1	34890968	34893166	5	0	1	0	1	1	0	0	1	0	1	0	0
chr1	35149155	35150179	1	0	0	0	0	1	0	0	0	0	0	0	0
chr1	35264278	35265828	2	1	0	0	0	0	0	0	1	0	0	0	0
chr1	35273974	35276278	9	1	1	1	0	1	0	1	1	1	1	1	0
chr1	35311183	35312459	2	0	0	0	0	0	0	0	1	1	0	0	0
chr1	35384394	35386779	8	1	1	1	0	1	0	1	1	1	0	1	0
chr1	35522445	35525288	10	1	1	1	0	1	0	1	1	1	1	1	1
chr1	35685465	35686237	1	0	1	0	0	0	0	0	0	0	0	0	0
chr1	35758775	35760052	1	0	0	0	0	0	1	0	0	0	0	0	0
chr1	35862176	35863440	2	1	0	0	0	0	0	0	1	0	0	0	0
chr1	35874849	35876447	3	1	0	1	0	0	0	1	0	0	0	0	0
chr1	35889810	35891583	5	1	1	1	0	0	0	1	1	0	0	0	0
chr1	35903892	35904955	6	0	1	0	0	1	0	0	1	1	0	1	1
chr1	35913356	35915395	12	1	1	1	1	1	1	1	1	1	1	1	1
chr1	35929807	35931757	3	0	0	0	0	0	0	1	1	0	0	0	1
chr1	35934661	35936571	6	0	1	0	0	0	0	1	1	1	1	1	0
chr1	35944284	35946028	1	0	0	0	0	0	0	0	1	0	0	0	0
chr1	35971564	35975343	12	1	1	1	1	1	1	1	1	1	1	1	1
chr1	35981060	35981555	1	0	0	0	0	0	0	0	1	0	0	0	0
chr1	35985479	35987853	7	1	0	0	1	1	1	0	0	0	1	1	1
chr1	35991838	35993965	8	0	0	1	1	1	1	1	0	0	1	1	1
chr1	36016290	36019303	12	1	1	1	1	1	1	1	1	1	1	1	1
chr1	36029789	36031495	12	1	1	1	1	1	1	1	1	1	1	1	1
chr1	36072253	36075372	4	0	1	1	1	0	0	1	0	0	0	0	0
chr1	36077307	36081936	12	1	1	1	1	1	1	1	1	1	1	1	1
chr1	36087119	36091643	10	1	1	0	1	1	1	0	1	1	1	1	1
chr1	36115671	36117846	5	1	1	1	0	0	0	0	1	1	0	0	0
chr1	36234671	36236504	3	0	1	0	0	0	0	0	1	1	0	0	0
chr1	36251675	36253687	9	1	1	0	1	1	0	1	1	0	1	1	1
chr1	36253767	36256691	11	1	1	0	1	1	1	1	1	1	1	1	1
chr1	36264009	36265726	2	0	0	0	0	0	0	0	1	0	1	0	0
chr1	36268472	36275320	8	1	1	0	0	1	1	0	1	0	1	1	1
chr1	36278642	36281125	6	1	1	1	0	1	1	0	1	0	0	0	0
chr1	36287314	36287922	3	0	0	0	0	0	0	0	0	0	1	1	1
chr1	36313976	36327829	10	1	1	1	0	1	0	1	1	1	1	1	1
chr1	36456577	36458478	8	1	1	0	1	1	0	1	1	0	0	1	1
chr1	36467345	36468462	1	0	0	0	0	0	0	0	1	0	0	0	0
chr1	36473235	36480405	2	0	0	1	0	0	0	0	0	0	1	0	0
chr1	36491524	36494001	11	1	1	1	0	1	1	1	1	1	1	1	1
chr1	36497971	36502564	7	1	0	0	1	1	1	0	1	0	1	1	0
chr1	36517983	36526121	12	1	1	1	1	1	1	1	1	1	1	1	1
chr1	36586843	36591727	8	1	0	0	1	1	1	0	1	0	1	1	1
chr1	36595303	36597027	1	0	0	0	0	1	0	0	0	0	0	0	0
chr1	36602458	36604680	7	1	0	1	1	1	1	0	1	0	1	0	0
chr1	36610200	36613225	1	0	0	0	0	0	0	0	0	0	1	0	0
chr1	36632811	36637027	12	1	1	1	1	1	1	1	1	1	1	1	1
chr1	36682656	36685369	11	1	1	1	1	1	1	1	1	0	1	1	1
chr1	36743238	36745451	7	1	0	0	1	1	1	0	1	1	0	1	0
chr1	36770199	36772433	7	1	1	0	1	0	1	0	0	0	1	1	1
chr1	36830105	36831746	4	0	0	0	0	1	1	0	0	0	0	1	1
chr1	36859831	36863030	4	1	0	0	1	1	0	0	0	0	1	0	0
chr1	36909903	36910812	1	0	0	0	0	1	0	0	0	0	0	0	0
chr1	36919609	36921801	2	0	1	0	0	0	0	0	1	0	0	0	0
chr1	37025871	37027742	6	1	0	0	0	1	0	1	1	1	0	1	0
chr1	37060926	37065859	8	1	1	1	1	0	0	1	1	1	1	0	0
chr1	37076897	37078847	8	1	1	1	0	1	0	1	1	1	1	0	0
chr1	37218216	37219154	10	1	1	0	1	1	1	1	1	0	1	1	1
chr1	37231047	37233094	3	1	1	0	0	0	0	1	0	0	0	0	0
chr1	37247878	37249093	4	0	0	0	1	1	0	0	0	0	1	0	1
chr1	37272395	37273411	1	0	0	0	0	1	0	0	0	0	0	0	0
chr1	37318082	37319272	1	1	0	0	0	0	0	0	0	0	0	0	0
chr1	37349604	37352868	10	1	1	1	0	1	1	1	1	1	1	0	1
chr1	37358587	37359630	2	0	0	0	0	0	0	1	0	0	1	0	0
chr1	37362594	37363351	2	0	0	0	0	0	0	1	1	0	0	0	0
chr1	37500753	37501710	1	0	0	0	0	0	0	0	1	0	0	0	0
chr1	37511553	37514613	11	1	1	1	1	1	1	1	1	1	1	1	0
chr1	37532460	37535760	7	1	1	0	0	1	0	0	1	1	1	1	0
chr1	37560329	37560846	1	0	0	0	0	0	0	0	1	0	0	0	0
chr1	37564568	37567327	8	1	1	0	0	1	0	1	1	1	1	1	0
chr1	37582966	37585135	8	1	0	0	0	1	0	1	1	1	1	1	1
chr1	37585172	37586549	9	1	1	1	0	1	0	1	1	1	1	1	0
chr1	37603256	37603683	1	0	0	0	0	0	0	0	1	0	0	0	0
chr1	37610330	37612651	1	0	0	0	0	0	1	0	0	0	0	0	0
chr1	37613904	37616449	1	0	0	0	0	0	0	0	0	0	0	1	0
chr1	37631011	37633114	1	0	0	0	0	0	0	0	1	0	0	0	0
chr1	37634442	37635266	1	0	0	0	0	0	0	0	1	0	0	0	0
chr1	37638608	37640099	12	1	1	1	1	1	1	1	1	1	1	1	1
chr1	37676931	37679368	9	0	1	1	1	1	1	1	1	1	1	0	0
chr1	37695632	37700066	12	1	1	1	1	1	1	1	1	1	1	1	1
chr1	37709334	37710608	5	0	0	0	0	1	0	1	1	0	1	1	0
chr1	37933721	37934147	1	0	0	0	0	0	0	0	0	0	0	0	1
chr1	37976812	37978176	6	1	1	1	0	1	0	0	1	1	0	0	0
chr1	38038493	38040190	6	1	1	0	0	1	0	0	1	0	1	0	1
chr1	38185130	38187527	11	1	1	1	1	1	1	1	1	0	1	1	1
chr1	38215949	38219192	11	1	1	1	1	1	1	1	1	0	1	1	1
chr1	38236857	38237695	1	0	0	0	0	0	0	0	1	0	0	0	0
chr1	38240672	38242166	1	0	0	0	0	0	0	0	1	0	0	0	0
chr1	38247121	38248542	6	1	0	0	1	1	1	0	1	0	0	1	0
chr1	38257232	38261352	11	1	1	1	0	1	1	1	1	1	1	1	1
chr1	38261612	38264594	12	1	1	1	1	1	1	1	1	1	1	1	1
chr1	38286001	38287349	2	0	1	0	0	0	0	0	1	0	0	0	0
chr1	38291579	38293678	4	0	1	0	0	0	0	1	1	1	0	0	0
chr1	38306845	38309684	12	1	1	1	1	1	1	1	1	1	1	1	1
chr1	38317593	38318904	2	0	1	1	0	0	0	0	0	0	0	0	0
chr1	38353313	38356421	9	1	1	0	0	1	0	1	1	1	1	1	1
chr1	38357402	38360057	10	1	1	0	0	1	1	1	1	1	1	1	1
chr1	38388966	38391069	4	1	0	0	0	0	0	1	1	1	0	0	0
chr1	38392022	38395910	5	0	1	1	0	0	1	1	1	0	0	0	0
chr1	38398131	38400164	1	1	0	0	0	0	0	0	0	0	0	0	0
chr1	38400838	38402955	4	1	1	0	0	0	0	0	1	1	0	0	0
chr1	38406850	38407524	1	0	0	0	0	0	0	0	1	0	0	0	0
chr1	38423442	38424858	1	0	0	0	0	0	0	0	1	0	0	0	0
chr1	38437783	38438093	1	0	0	0	0	0	0	0	1	0	0	0	0
chr1	38469225	38471547	11	1	1	1	1	1	0	1	1	1	1	1	1
chr1	38511604	38513840	5	0	0	0	1	1	0	0	1	0	1	1	0
chr1	38545730	38549662	5	1	1	0	0	1	0	1	1	0	0	0	0
chr1	38600649	38602701	10	1	1	1	1	1	1	1	1	0	1	1	0
chr1	38641881	38643171	3	0	0	0	1	1	1	0	0	0	0	0	0
chr1	38647094	38648616	2	0	1	0	0	0	0	0	1	0	0	0	0
chr1	38651876	38653782	2	0	0	0	0	0	0	0	0	1	0	0	1
chr1	38656951	38660181	12	1	1	1	1	1	1	1	1	1	1	1	1
chr1	38666369	38667431	1	0	1	0	0	0	0	0	0	0	0	0	0
chr1	38698690	38701269	1	0	0	0	0	0	1	0	0	0	0	0	0
chr1	38734623	38736984	12	1	1	1	1	1	1	1	1	1	1	1	1
chr1	38757214	38759556	12	1	1	1	1	1	1	1	1	1	1	1	1
chr1	38759971	38762566	12	1	1	1	1	1	1	1	1	1	1	1	1
chr1	38762958	38768935	12	1	1	1	1	1	1	1	1	1	1	1	1
chr1	38770027	38771277	1	0	0	0	0	0	0	0	1	0	0	0	0
chr1	38784222	38789135	10	1	1	0	1	1	1	1	1	1	1	1	0
chr1	38815895	38817954	3	0	0	0	1	1	1	0	0	0	0	0	0
chr1	38834697	38837910	12	1	1	1	1	1	1	1	1	1	1	1	1
chr1	38864060	38867960	4	0	1	0	0	1	0	0	0	0	1	0	1
chr1	38972728	38973805	5	1	1	0	0	0	0	1	1	1	0	0	0
chr1	39000348	39001990	4	1	0	1	1	1	0	0	0	0	0	0	0
chr1	39104643	39106596	5	1	1	1	0	0	0	0	1	1	0	0	0
chr1	39190879	39198333	12	1	1	1	1	1	1	1	1	1	1	1	1
chr1	39250948	39252953	12	1	1	1	1	1	1	1	1	1	1	1	1
chr1	39254979	39258192	11	1	1	1	1	1	1	0	1	1	1	1	1
chr1	39311171	39314229	7	1	0	0	0	1	1	0	1	0	1	1	1
chr1	39316961	39320384	10	1	1	1	1	1	0	1	1	1	1	1	0
chr1	39340091	39342059	8	1	1	0	1	1	1	1	1	1	0	0	0
chr1	39361488	39362672	1	0	1	0	0	0	0	0	0	0	0	0	0
chr1	39389027	39392856	8	1	0	1	1	1	1	0	1	0	1	1	0
chr1	39398140	39400212	3	0	0	0	0	1	0	1	1	0	0	0	0
chr1	39417247	39419193	5	0	1	0	0	1	1	1	0	0	1	0	0
chr1	39529562	39531699	3	0	0	0	0	0	1	1	0	0	1	0	0
chr1	39636092	39637208	1	0	0	0	0	0	0	0	1	0	0	0	0
chr1	39685232	39688010	5	1	1	0	0	1	1	0	0	0	0	0	1
chr1	39694129	39696634	5	1	1	0	0	1	0	0	1	0	0	1	0
chr1	39697365	39699094	1	0	0	0	0	1	0	0	0	0	0	0	0
chr1	39713271	39715757	3	0	0	0	0	0	1	0	0	0	1	0	1
chr1	39718963	39721873	12	1	1	1	1	1	1	1	1	1	1	1	1
chr1	39735515	39736827	1	1	0	0	0	0	0	0	0	0	0	0	0
chr1	39753689	39763202	12	1	1	1	1	1	1	1	1	1	1	1	1
chr1	39830587	39832668	6	1	0	1	1	1	1	0	0	0	0	1	0
chr1	39866397	39870490	5	1	0	0	0	1	1	1	0	0	0	1	0
chr1	39877408	39878640	3	1	1	0	0	0	0	0	0	1	0	0	0
chr1	39893806	39895910	12	1	1	1	1	1	1	1	1	1	1	1	1
chr1	39922733	39924316	2	0	1	0	0	0	0	0	0	0	0	1	0
chr1	39924597	39928002	5	1	1	0	0	1	0	0	1	0	0	1	0
chr1	39930444	39938513	12	1	1	1	1	1	1	1	1	1	1	1	1
chr1	39940333	39942550	7	0	0	1	1	0	0	1	0	1	1	1	1
chr1	39956465	39958613	5	1	1	0	0	0	0	0	1	1	0	1	0
chr1	39961762	39964500	10	1	1	1	1	1	1	0	1	1	1	1	0
chr1	40115233	40116983	2	0	0	0	0	1	0	0	1	0	0	0	0
chr1	40139300	40140930	9	1	1	1	0	1	1	1	1	1	0	1	0
chr1	40170891	40172947	7	1	1	1	0	1	0	1	1	1	0	0	0
chr1	40173459	40175605	10	1	1	1	0	1	0	1	1	1	1	1	1
chr1	40187444	40188545	2	0	1	0	0	0	0	0	1	0	0	0	0
chr1	40223301	40226072	12	1	1	1	1	1	1	1	1	1	1	1	1
chr1	40232680	40234517	7	1	1	1	0	0	0	1	1	1	1	0	0
chr1	40234644	40237616	10	1	1	1	1	1	0	1	1	1	1	1	0
chr1	40265111	40268148	12	1	1	1	1	1	1	1	1	1	1	1	1
chr1	40273940	40276860	12	1	1	1	1	1	1	1	1	1	1	1	1
chr1	40324034	40327070	12	1	1	1	1	1	1	1	1	1	1	1	1
chr1	40358298	40361346	5	0	1	1	0	0	0	1	1	1	0	0	0
chr1	40378535	40381086	2	0	0	0	0	1	0	1	0	0	0	0	0
chr1	40392822	40393876	1	0	0	0	0	0	0	0	1	0	0	0	0
chr1	40444518	40445910	6	1	1	1	0	1	0	1	1	0	0	0	0
chr1	40483794	40485777	9	1	1	0	0	1	0	1	1	1	1	1	1
chr1	40579572	40580758	2	0	0	0	0	0	1	0	0	0	0	1	0
chr1	40740440	40742716	1	1	0	0	0	0	0	0	0	0	0	0	0
chr1	40814817	40816778	12	1	1	1	1	1	1	1	1	1	1	1	1
chr1	40824489	40826627	6	1	0	1	1	0	1	0	1	0	0	1	0
chr1	40839466	40843220	11	1	1	1	0	1	1	1	1	1	1	1	1
chr1	40843909	40848376	12	1	1	1	1	1	1	1	1	1	1	1	1
chr1	40876915	40880801	12	1	1	1	1	1	1	1	1	1	1	1	1
chr1	40887301	40888891	12	1	1	1	1	1	1	1	1	1	1	1	1
chr1	40915269	40916951	1	0	0	0	0	0	0	0	0	0	0	0	1
chr1	40966679	40969208	6	1	1	0	1	1	0	1	0	0	1	0	0
chr1	41034492	41036142	3	1	0	0	0	1	1	0	0	0	0	0	0
chr1	41036711	41037535	5	1	0	0	1	1	1	0	0	0	0	1	0
chr1	41234459	41236398	6	0	0	0	1	1	1	0	0	0	1	1	1
chr1	41270568	41271884	1	0	0	0	0	0	0	0	1	0	0	0	0
chr1	41826195	41827146	1	0	0	0	0	0	0	0	1	0	0	0	0
chr1	41887587	41890206	4	1	1	0	0	0	0	1	1	0	0	0	0
chr1	41890861	41892820	1	1	0	0	0	0	0	0	0	0	0	0	0
chr1	41905561	41906415	1	0	0	0	0	0	0	0	1	0	0	0	0
chr1	41915747	41919735	9	1	1	1	1	1	1	1	1	0	0	1	0
chr1	42007802	42008757	2	1	0	0	0	0	0	0	1	0	0	0	0
chr1	42124422	42126835	8	1	1	1	0	1	0	0	1	1	0	1	1
chr1	42151990	42154932	11	1	1	1	0	1	1	1	1	1	1	1	1
chr1	42169252	42169974	2	0	1	0	0	0	0	0	1	0	0	0	0
chr1	42224742	42228623	11	1	1	1	1	1	1	0	1	1	1	1	1
chr1	42232902	42234425	3	1	0	0	1	0	1	0	0	0	0	0	0
chr1	42258871	42261227	4	0	1	1	1	0	0	0	0	0	0	1	0
chr1	42261488	42262225	1	0	0	0	1	0	0	0	0	0	0	0	0
chr1	42305359	42306340	1	0	0	0	0	0	0	0	1	0	0	0	0
chr1	42325047	42326279	1	0	1	0	0	0	0	0	0	0	0	0	0
chr1	42351021	42354183	4	1	0	0	0	1	1	0	0	0	1	0	0
chr1	42361009	42365245	12	1	1	1	1	1	1	1	1	1	1	1	1
chr1	42386587	42389176	11	1	1	1	1	1	0	1	1	1	1	1	1
chr1	42394662	42397209	12	1	1	1	1	1	1	1	1	1	1	1	1
chr1	42479619	42481710	2	0	0	0	0	0	0	0	1	0	1	0	0
chr1	42501865	42506464	7	1	1	0	0	1	0	1	1	0	1	0	1
chr1	42537717	42541480	9	1	0	1	1	1	1	1	1	0	1	1	0
chr1	42588630	42589897	1	0	0	0	0	0	0	0	1	0	0	0	0
chr1	42590886	42593706	11	1	1	1	1	1	0	1	1	1	1	1	1
chr1	42623033	42625987	10	1	1	1	0	1	0	1	1	1	1	1	1
chr1	42628601	42631894	11	1	1	1	1	1	1	1	1	1	0	1	1
chr1	42648047	42652272	4	1	0	0	0	0	1	0	1	0	1	0	0
chr1	42683987	42685523	1	0	0	0	1	0	0	0	0	0	0	0	0
chr1	42689882	42692802	6	1	1	0	1	1	0	0	1	0	0	1	0
chr1	42703133	42706194	11	1	1	1	1	1	1	1	1	0	1	1	1
chr1	42709263	42717061	12	1	1	1	1	1	1	1	1	1	1	1	1
chr1	42717964	42720009	12	1	1	1	1	1	1	1	1	1	1	1	1
chr1	42727144	42729152	7	1	1	0	0	0	0	1	1	1	1	1	0
chr1	42739849	42742893	12	1	1	1	1	1	1	1	1	1	1	1	1
chr1	42768741	42769941	3	0	0	0	0	0	0	0	1	1	0	1	0
chr1	42771040	42772823	3	0	1	0	0	1	1	0	0	0	0	0	0
chr1	42773857	42776262	11	1	1	0	1	1	1	1	1	1	1	1	1
chr1	42779531	42781113	2	1	0	0	0	0	0	0	1	0	0	0	0
chr1	42817373	42818719	1	0	0	0	0	0	0	1	0	0	0	0	0
chr1	42821137	42823945	12	1	1	1	1	1	1	1	1	1	1	1	1
chr1	42853933	42855095	1	0	1	0	0	0	0	0	0	0	0	0	0
chr1	42881748	42882897	4	0	0	0	0	0	0	1	1	1	0	1	0
chr1	42887806	42889939	4	1	0	0	0	1	0	0	0	0	1	1	0
chr1	42916419	42919159	12	1	1	1	1	1	1	1	1	1	1	1	1
chr1	43051601	43052394	2	0	0	0	0	0	0	0	0	1	0	0	1
chr1	43109358	43110976	2	0	1	0	0	0	0	0	1	0	0	0	0
chr1	43127484	43129400	9	1	1	1	0	1	0	1	1	1	0	1	1
chr1	43150087	43151307	1	0	0	0	0	0	0	0	1	0	0	0	0
chr1	43167549	43171084	12	1	1	1	1	1	1	1	1	1	1	1	1
chr1	43211348	43212907	3	1	0	1	0	0	0	0	1	0	0	0	0
chr1	43263890	43265552	6	1	1	1	1	0	1	0	1	0	0	0	0
chr1	43299039	43300442	1	0	0	0	0	0	0	1	0	0	0	0	0
chr1	43304303	43307405	12	1	1	1	1	1	1	1	1	1	1	1	1
chr1	43309351	43312376	7	1	1	0	1	1	1	0	1	0	1	0	0
chr1	43358207	43358619	1	1	0	0	0	0	0	0	0	0	0	0	0
chr1	43359641	43362343	12	1	1	1	1	1	1	1	1	1	1	1	1
chr1	43387125	43389195	1	0	0	0	0	1	0	0	0	0	0	0	0
chr1	43395073	43396884	2	1	0	0	0	1	0	0	0	0	0	0	0
chr1	43422019	43423860	8	1	1	1	0	1	0	1	1	1	0	1	0
chr1	43462176	43472807	11	1	1	1	0	1	1	1	1	1	1	1	1
chr1	43473685	43475981	10	1	1	1	0	1	1	1	1	1	0	1	1
chr1	43481536	43484830	10	1	1	1	0	1	1	1	1	1	0	1	1
chr1	43505553	43507770	6	0	1	1	0	1	1	0	1	1	0	0	0
chr1	43529961	43531789	2	1	0	0	0	0	0	0	1	0	0	0	0
chr1	43543787	43545897	7	1	1	1	0	1	0	0	1	1	0	1	0
chr1	43547926	43549328	1	0	0	0	0	0	0	0	1	0	0	0	0
chr1	43553792	43556992	3	1	1	0	0	1	0	0	0	0	0	0	0
chr1	43574353	43575590	3	0	0	0	1	1	0	0	0	0	0	1	0
chr1	43582926	43584446	6	0	1	1	0	1	0	0	1	1	0	1	0
chr1	43593000	43596853	10	1	1	1	1	1	1	0	1	1	1	1	0
chr1	43714897	43715424	1	0	0	0	0	0	0	0	1	0	0	0	0
chr1	43717712	43720029	8	1	1	1	0	1	0	0	1	1	0	1	1
chr1	43729088	43734212	12	1	1	1	1	1	1	1	1	1	1	1	1
chr1	43737098	43739393	5	1	0	1	1	1	1	0	0	0	0	0	0
chr1	43759616	43760953	2	0	0	0	0	0	0	0	1	1	0	0	0
chr1	43765549	43767227	9	1	1	1	0	1	0	1	1	1	0	1	1
chr1	43767521	43770788	11	1	1	1	0	1	1	1	1	1	1	1	1
chr1	43817748	43820724	12	1	1	1	1	1	1	1	1	1	1	1	1
chr1	43843290	43847369	11	1	1	0	1	1	1	1	1	1	1	1	1
chr1	43879110	43879878	1	0	0	0	0	0	0	0	1	0	0	0	0
chr1	43938696	43939517	1	0	0	0	0	1	0	0	0	0	0	0	0
chr1	43968551	43970292	9	1	1	1	0	1	0	1	1	1	1	1	0
chr1	44020035	44020749	1	0	0	0	0	0	0	0	0	0	0	1	0
chr1	44087432	44089264	10	1	1	1	1	1	1	0	1	0	1	1	1
chr1	44197886	44200377	12	1	1	1	1	1	1	1	1	1	1	1	1
chr1	44201062	44201320	1	0	0	0	0	0	0	0	0	0	1	0	0
chr1	44228331	44229825	3	1	0	1	0	0	0	0	1	0	0	0	0
chr1	44395216	44396205	2	0	0	0	0	0	0	0	1	0	0	1	0
chr1	44480531	44481994	9	1	0	0	1	1	1	0	1	1	1	1	1
chr1	44490939	44491699	2	0	0	0	0	0	0	0	0	0	0	1	1
chr1	44583698	44586279	12	1	1	1	1	1	1	1	1	1	1	1	1
chr1	44590939	44592587	3	0	1	0	0	0	0	0	1	1	0	0	0
chr1	44618132	44619038	1	1	0	0	0	0	0	0	0	0	0	0	0
chr1	44678116	44680506	12	1	1	1	1	1	1	1	1	1	1	1	1
chr1	44692620	44693476	3	0	0	0	1	0	0	0	0	0	0	1	1
chr1	44849281	44850088	2	0	0	0	0	0	0	0	1	1	0	0	0
chr1	44956585	44958588	5	1	1	0	0	1	0	0	0	1	1	0	0
chr1	44959326	44960739	6	0	0	0	1	0	1	0	1	1	0	1	1
chr1	45020427	45023821	7	1	1	1	1	1	0	0	1	0	0	1	0
chr1	45031096	45032603	3	1	1	1	0	0	0	0	0	0	0	0	0
chr1	45040819	45044970	12	1	1	1	1	1	1	1	1	1	1	1	1
chr1	45054944	45057279	6	1	1	1	0	0	0	1	1	1	0	0	0
chr1	45116631	45117445	2	0	0	0	1	1	0	0	0	0	0	0	0
chr1	45204898	45205977	2	0	0	0	1	0	0	0	0	0	0	1	0
chr1	45310987	45313278	5	0	0	0	1	0	1	1	0	1	0	0	1
chr1	45315397	45317120	11	1	1	1	1	1	1	1	1	1	1	1	0
chr1	45345833	45349083	3	0	0	0	1	0	0	1	0	0	1	0	0
chr1	45385378	45386877	5	1	0	1	1	1	1	0	0	0	0	0	0
chr1	45405883	45407271	3	1	0	0	0	1	0	0	0	0	0	0	1
chr1	45431710	45432634	6	1	1	0	0	1	0	0	1	1	1	0	0
chr1	45531008	45532807	1	0	0	0	0	0	0	0	1	0	0	0	0
chr1	45541233	45542182	1	0	0	0	0	0	0	0	1	0	0	0	0
chr1	45580355	45581395	2	0	0	0	0	1	0	0	1	0	0	0	0
chr1	45587102	45588470	7	0	1	0	0	1	0	1	1	1	1	1	0
chr1	45599449	45600727	3	0	0	0	0	1	0	0	0	0	1	1	0
chr1	45619517	45620583	1	0	0	0	0	0	0	0	0	1	0	0	0
chr1	45625733	45629305	8	1	1	1	0	1	0	0	1	1	1	1	0
chr1	45647035	45648159	1	0	0	0	0	0	0	0	0	0	1	0	0
chr1	45671721	45674386	12	1	1	1	1	1	1	1	1	1	1	1	1
chr1	45674798	45676792	11	1	1	1	1	1	1	1	1	0	1	1	1
chr1	45700487	45702301	9	1	0	1	1	1	1	1	1	1	1	0	0
chr1	45723125	45724228	1	0	0	0	0	0	0	1	0	0	0	0	0
chr1	45733910	45735895	12	1	1	1	1	1	1	1	1	1	1	1	1
chr1	45755664	45758703	2	0	0	0	0	0	0	0	1	0	0	1	0
chr1	45764892	45769170	12	1	1	1	1	1	1	1	1	1	1	1	1
chr1	45816136	45817402	3	0	1	0	0	1	0	0	1	0	0	0	0
chr1	45836568	45838914	10	1	1	1	0	1	0	1	1	1	1	1	1
chr1	45864088	45867821	10	1	1	1	1	1	1	0	1	0	1	1	1
chr1	45893363	45895540	7	1	0	1	1	1	1	0	0	0	0	1	1
chr1	45905068	45906059	1	1	0	0	0	0	0	0	0	0	0	0	0
chr1	45932084	45933226	2	0	0	0	0	0	0	0	1	0	0	1	0
chr1	46075942	46076181	3	0	0	0	1	0	0	0	0	1	0	0	1
chr1	46088947	46089497	1	0	0	0	0	0	0	0	0	0	0	1	0
chr1	46277900	46280272	4	1	0	0	1	1	1	0	0	0	0	0	0
chr1	46295923	46297698	12	1	1	1	1	1	1	1	1	1	1	1	1
chr1	46336399	46338524	3	1	1	1	0	0	0	0	0	0	0	0	0
chr1	46408227	46409547	5	1	1	0	0	1	0	0	1	0	0	1	0
chr1	46448837	46449966	5	0	0	0	1	0	1	0	1	0	0	1	1
chr1	46608113	46609428	2	0	0	1	1	0	0	0	0	0	0	0	0
chr1	46807923	46810455	10	1	1	1	0	1	0	1	1	1	1	1	1
chr1	46863439	46865217	7	1	1	1	0	0	0	1	1	1	0	1	0
chr1	46884269	46889025	10	1	1	0	1	1	1	0	1	1	1	1	1
chr1	46964406	46965886	2	0	0	0	0	0	0	0	1	1	0	0	0
chr1	46985420	46987112	5	1	0	0	1	1	1	0	0	0	1	0	0
chr1	46997220	46998367	2	0	0	0	0	0	0	0	0	0	0	1	1
chr1	46998845	47001436	2	0	0	1	0	1	0	0	0	0	0	0	0
chr1	47103372	47105199	2	0	0	0	0	1	0	0	0	0	0	1	0
chr1	47191421	47192255	1	0	0	0	0	0	0	0	1	0	0	0	0
chr1	47628980	47630664	12	1	1	1	1	1	1	1	1	1	1	1	1
chr1	47720518	47721503	1	0	0	0	0	0	0	0	0	0	0	1	0
chr1	48545729	48547655	3	0	0	0	1	0	0	0	0	0	0	1	1
chr1	50961395	50963786	8	1	1	0	0	1	1	0	1	1	1	1	0
chr1	50972069	50973269	1	1	0	0	0	0	0	0	0	0	0	0	0
chr1	51121964	51123521	2	0	0	0	0	0	0	0	1	0	0	1	0
chr1	51136009	51137690	1	0	0	0	0	0	0	0	0	0	1	0	0
chr1	51216950	51218381	1	0	0	0	0	0	0	0	0	1	0	0	0
chr1	51220253	51221229	3	0	1	0	0	0	0	0	0	1	0	0	1
chr1	51243187	51243825	1	0	0	0	0	0	0	0	1	0	0	0	0
chr1	51250130	51250878	2	0	0	0	0	0	0	0	1	1	0	0	0
chr1	51264298	51266112	9	1	1	1	0	1	0	1	1	1	1	1	0
chr1	51287914	51293050	12	1	1	1	1	1	1	1	1	1	1	1	1
chr1	51370344	51371973	2	0	0	0	0	1	0	0	0	0	0	1	0
chr1	51374388	51376390	1	0	0	0	0	1	0	0	0	0	0	0	0
chr1	51403483	51405655	10	1	1	1	0	1	0	1	1	1	1	1	1
chr1	51445211	51447147	6	1	0	1	1	1	0	0	1	0	0	1	0
chr1	51456251	51459917	11	1	1	0	1	1	1	1	1	1	1	1	1
chr1	51505378	51506119	3	0	0	0	0	1	0	0	1	0	0	1	0
chr1	51508327	51510234	12	1	1	1	1	1	1	1	1	1	1	1	1
chr1	51512863	51513655	1	0	0	0	0	0	0	0	0	0	0	1	0
chr1	51584199	51585731	12	1	1	1	1	1	1	1	1	1	1	1	1
chr1	51614302	51616720	8	1	1	1	1	0	1	0	1	1	0	0	1
chr1	51624297	51626946	3	0	0	0	0	1	0	0	0	0	1	1	0
chr1	51643168	51645217	3	0	1	0	0	1	0	0	1	0	0	0	0
chr1	51688666	51691667	10	1	1	1	1	1	1	0	1	1	1	0	1
chr1	51705906	51706781	1	0	1	0	0	0	0	0	0	0	0	0	0
chr1	51719909	51720830	3	0	0	0	0	1	0	0	1	0	0	1	0
chr1	51746441	51748431	9	1	1	1	1	1	0	0	1	0	1	1	1
chr1	51761296	51762073	2	0	0	0	0	0	0	0	1	0	0	1	0
chr1	51784676	51787280	3	0	1	0	0	1	0	0	0	0	0	1	0
chr1	51788635	51790291	8	1	1	1	0	1	0	0	1	1	0	1	1
chr1	51807650	51810226	11	1	1	1	1	1	1	0	1	1	1	1	1
chr1	51819281	51822967	8	1	1	0	0	1	0	0	1	1	1	1	1
chr1	51828748	51831509	4	1	1	0	0	0	0	0	1	1	0	0	0
chr1	51835645	51840434	8	1	1	1	0	1	1	0	1	1	0	0	1
chr1	51841572	51844536	5	1	0	0	0	1	1	0	1	0	0	1	0
chr1	51874515	51877032	6	1	1	1	0	0	1	0	1	0	0	1	0
chr1	51878807	51880926	3	0	1	0	0	0	0	1	0	0	1	0	0
chr1	51885308	51888606	4	1	1	0	0	1	0	0	0	0	1	0	0
chr1	51889064	51898259	12	1	1	1	1	1	1	1	1	1	1	1	1
chr1	51911432	51913896	1	0	0	0	0	1	0	0	0	0	0	0	0
chr1	51922037	51923819	12	1	1	1	1	1	1	1	1	1	1	1	1
chr1	51929478	51931162	1	1	0	0	0	0	0	0	0	0	0	0	0
chr1	51944655	51945837	1	0	1	0	0	0	0	0	0	0	0	0	0
chr1	51994994	51999198	12	1	1	1	1	1	1	1	1	1	1	1	1
chr1	52007487	52010047	12	1	1	1	1	1	1	1	1	1	1	1	1
chr1	52033671	52035835	2	0	0	0	0	0	0	1	1	0	0	0	0
chr1	52038633	52042167	4	1	1	1	0	0	0	0	1	0	0	0	0
chr1	52098020	52099591	1	0	0	0	0	0	0	0	0	0	1	0	0
chr1	52100529	52100905	1	0	1	0	0	0	0	0	0	0	0	0	0
chr1	52158417	52159737	2	0	0	1	0	0	0	0	1	0	0	0	0
chr1	52165429	52172620	12	1	1	1	1	1	1	1	1	1	1	1	1
chr1	52174942	52177295	1	1	0	0	0	0	0	0	0	0	0	0	0
chr1	52246537	52248098	5	0	1	0	0	0	0	1	1	1	0	1	0
chr1	52251253	52255834	12	1	1	1	1	1	1	1	1	1	1	1	1
chr1	52277674	52279007	5	1	1	0	0	0	0	0	1	1	0	1	0
chr1	52298799	52299950	1	0	1	0	0	0	0	0	0	0	0	0	0
chr1	52353435	52354905	1	0	0	0	0	0	0	0	1	0	0	0	0
chr1	52388073	52388415	1	0	0	0	0	0	0	0	1	0	0	0	0
chr1	52399584	52401018	9	0	1	0	1	1	1	0	1	1	1	1	1
chr1	52427543	52428511	1	0	0	0	0	0	0	0	1	0	0	0	0
chr1	52453678	52456473	10	1	1	1	0	1	0	1	1	1	1	1	1
chr1	52520768	52522387	4	0	0	0	0	0	0	1	1	0	1	1	0
chr1	52651517	52653615	6	1	0	0	1	1	1	0	0	0	1	1	0
chr1	52671657	52674331	10	1	0	1	0	1	1	1	1	1	1	1	1
chr1	52674957	52677936	10	1	1	0	1	1	1	0	1	1	1	1	1
chr1	52747376	52749224	4	0	0	0	0	1	0	0	1	0	1	1	0
chr1	52789497	52791187	1	0	0	0	0	1	0	0	0	0	0	0	0
chr1	52793685	52794996	1	0	0	0	0	0	0	0	0	0	0	0	1
chr1	52798158	52804383	12	1	1	1	1	1	1	1	1	1	1	1	1
chr1	52834415	52835364	1	0	0	0	0	0	0	0	1	0	0	0	0
chr1	52855275	52857180	4	1	0	0	0	1	0	0	0	0	1	1	0
chr1	53037421	53038376	1	0	0	0	0	0	0	0	0	1	0	0	0
chr1	53052451	53054077	5	1	1	0	0	0	0	0	1	1	0	1	0
chr1	53194467	53204286	12	1	1	1	1	1	1	1	1	1	1	1	1
chr1	53213522	53214552	3	0	0	0	1	1	1	0	0	0	0	0	0
chr1	53391862	53396546	12	1	1	1	1	1	1	1	1	1	1	1	1
chr1	53565009	53567053	6	1	1	1	1	1	1	0	0	0	0	0	0
chr1	53583112	53583959	1	0	0	0	0	0	0	0	1	0	0	0	0
chr1	53595327	53597549	1	0	0	0	0	0	0	0	1	0	0	0	0
chr1	53714512	53717184	7	1	1	0	0	1	1	0	1	1	0	1	0
chr1	53720324	53721886	6	1	1	1	0	1	0	0	1	0	0	1	0
chr1	53773473	53774791	1	0	0	0	0	1	0	0	0	0	0	0	0
chr1	53821441	53825169	12	1	1	1	1	1	1	1	1	1	1	1	1
chr1	53838192	53839068	1	0	0	0	0	1	0	0	0	0	0	0	0
chr1	53845220	53846684	2	0	0	0	0	0	0	0	1	0	0	1	0
chr1	53852047	53854329	7	1	0	0	0	1	1	0	1	1	1	1	0
chr1	53855103	53857377	8	1	1	1	1	1	0	0	1	1	0	1	0
chr1	53859334	53861389	1	0	0	0	0	0	0	0	1	0	0	0	0
chr1	53889241	53891804	4	1	0	1	0	1	0	0	1	0	0	0	0
chr1	53893035	53896251	12	1	1	1	1	1	1	1	1	1	1	1	1
chr1	53899320	53901030	1	0	0	0	0	1	0	0	0	0	0	0	0
chr1	53929825	53933333	11	1	1	1	1	1	0	1	1	1	1	1	1
chr1	53976099	53979049	5	1	1	1	0	0	0	0	1	1	0	0	0
chr1	53983116	53988223	12	1	1	1	1	1	1	1	1	1	1	1	1
chr1	54014226	54015940	1	0	0	0	0	0	0	0	1	0	0	0	0
chr1	54117377	54124819	7	1	1	1	0	1	1	0	1	1	0	0	0
chr1	54125909	54129847	10	1	1	1	1	1	1	0	1	1	0	1	1
chr1	54323012	54323560	1	0	0	0	0	0	0	0	0	0	0	0	1
chr1	54363117	54364797	1	0	0	0	0	0	0	0	1	0	0	0	0
chr1	54380844	54381921	1	0	0	0	0	0	1	0	0	0	0	0	0
chr1	54386885	54387768	2	0	0	0	1	0	0	0	0	0	0	1	0
chr1	54688547	54689671	1	1	0	0	0	0	0	0	0	0	0	0	0
chr1	54712838	54714797	11	1	1	1	0	1	1	1	1	1	1	1	1
chr1	54814918	54816690	4	0	1	0	0	0	0	1	1	1	0	0	0
chr1	54825772	54827525	3	1	0	0	0	0	0	0	1	1	0	0	0
chr1	54845668	54848423	9	1	1	0	1	1	1	0	1	0	1	1	1
chr1	54849523	54854120	12	1	1	1	1	1	1	1	1	1	1	1	1
chr1	54864097	54866568	8	1	1	1	0	1	0	1	1	1	1	0	0
chr1	54884813	54885092	1	0	0	0	0	0	0	0	0	0	0	1	0
chr1	54887422	54889626	3	1	0	0	0	1	1	0	0	0	0	0	0
chr1	54896008	54898232	9	1	1	1	1	1	0	0	1	1	0	1	1
chr1	54900422	54902125	2	0	1	0	0	0	1	0	0	0	0	0	0
chr1	54905453	54911048	12	1	1	1	1	1	1	1	1	1	1	1	1
chr1	54913485	54915049	5	1	0	1	1	1	1	0	0	0	0	0	0
chr1	54922045	54923066	1	0	1	0	0	0	0	0	0	0	0	0	0
chr1	54928475	54932748	6	1	0	0	1	1	1	0	0	0	1	1	0
chr1	54971039	54972573	5	0	0	0	1	1	1	0	0	0	0	1	1
chr1	55048918	55049567	1	0	0	0	0	0	0	0	1	0	0	0	0
chr1	55073521	55077485	1	0	0	0	0	0	0	0	1	0	0	0	0
chr1	55095740	55097779	2	0	1	0	0	0	0	0	0	0	0	1	0
chr1	55191891	55196966	12	1	1	1	1	1	1	1	1	1	1	1	1
chr1	55201390	55203636	7	0	1	0	0	1	1	0	1	0	1	1	1
chr1	55210200	55211403	2	0	0	0	1	0	1	0	0	0	0	0	0
chr1	55220253	55228801	12	1	1	1	1	1	1	1	1	1	1	1	1
chr1	55412201	55412905	1	0	0	0	0	0	0	0	1	0	0	0	0
chr1	55527979	55530557	12	1	1	1	1	1	1	1	1	1	1	1	1
chr1	55533373	55534138	1	0	0	0	0	0	0	0	1	0	0	0	0
chr1	55575553	55577082	8	1	1	1	0	1	0	0	1	1	0	1	1
chr1	55864897	55865934	6	0	1	0	0	1	0	0	1	0	1	1	1
chr1	55886065	55887092	2	0	1	0	0	0	0	0	1	0	0	0	0
chr1	55960232	55961575	4	1	0	0	0	1	0	0	1	0	1	0	0
chr1	56011095	56011829	1	0	0	0	0	0	0	0	1	0	0	0	0
chr1	56098270	56099475	8	0	1	0	1	1	1	0	1	0	1	1	1
chr1	56130154	56131967	4	0	0	0	0	1	0	1	0	1	0	1	0
chr1	56182819	56185417	10	1	1	1	0	1	0	1	1	1	1	1	1
chr1	56418365	56420538	4	0	0	0	0	1	1	0	0	0	1	1	0
chr1	56684806	56685609	1	0	0	0	0	0	0	0	1	0	0	0	0
chr1	56714141	56715206	2	0	0	0	0	0	0	0	0	0	0	1	1
chr1	56781825	56782690	10	1	1	0	1	0	1	1	1	1	1	1	1
chr1	56924309	56927548	7	0	0	0	1	1	1	0	1	0	1	1	1
chr1	56957548	56960471	3	0	0	0	1	1	1	0	0	0	0	0	0
chr1	56975224	56978897	12	1	1	1	1	1	1	1	1	1	1	1	1
chr1	56979539	56985616	10	1	1	1	0	1	1	1	1	0	1	1	1
chr1	57094785	57099051	12	1	1	1	1	1	1	1	1	1	1	1	1
chr1	57188349	57192293	9	1	1	0	1	1	1	0	1	1	0	1	1
chr1	57202914	57207896	12	1	1	1	1	1	1	1	1	1	1	1	1
chr1	57226997	57228454	2	0	0	0	0	1	0	0	0	0	0	1	0
chr1	57266757	57268485	1	0	0	0	0	1	0	0	0	0	0	0	0
chr1	57268767	57270986	12	1	1	1	1	1	1	1	1	1	1	1	1
chr1	57325198	57326949	3	0	0	0	1	1	1	0	0	0	0	0	0
chr1	57367792	57368900	4	0	0	0	1	1	1	0	0	0	1	0	0
chr1	57423574	57424293	1	0	0	0	0	0	0	0	1	0	0	0	0
chr1	57440306	57441425	3	0	0	0	1	1	1	0	0	0	0	0	0
chr1	57477429	57478031	1	0	0	0	1	0	0	0	0	0	0	0	0
chr1	57528085	57529646	9	1	1	1	0	1	0	1	1	1	0	1	1
chr1	57571358	57572302	1	0	0	0	0	0	0	0	1	0	0	0	0
chr1	57578070	57584073	10	1	1	1	1	1	1	0	1	1	1	1	0
chr1	57593257	57595106	1	1	0	0	0	0	0	0	0	0	0	0	0
chr1	57605281	57608983	12	1	1	1	1	1	1	1	1	1	1	1	1
chr1	57612646	57613670	1	1	0	0	0	0	0	0	0	0	0	0	0
chr1	57784109	57784966	2	0	0	0	0	0	0	0	1	1	0	0	0
chr1	57787579	57792945	12	1	1	1	1	1	1	1	1	1	1	1	1
chr1	57803967	57809178	10	1	1	0	1	1	1	1	1	0	1	1	1
chr1	57845248	57850761	4	0	1	1	0	0	0	0	1	1	0	0	0
chr1	57867802	57873156	4	0	0	0	1	0	1	0	0	0	0	1	1
chr1	57873572	57874614	2	0	0	0	0	0	0	0	1	0	0	1	0
chr1	57897549	57899036	1	0	0	0	0	0	1	0	0	0	0	0	0
chr1	57904124	57907619	6	1	0	0	1	1	1	0	0	0	1	0	1
chr1	57940089	57941987	1	1	0	0	0	0	0	0	0	0	0	0	0
chr1	57947133	57948067	1	0	0	0	0	0	0	0	1	0	0	0	0
chr1	58088769	58091734	12	1	1	1	1	1	1	1	1	1	1	1	1
chr1	58111589	58113660	12	1	1	1	1	1	1	1	1	1	1	1	1
chr1	58193869	58196272	4	1	0	0	0	0	0	1	1	1	0	0	0
chr1	58209620	58212734	8	1	0	1	1	1	1	0	0	0	1	1	1
chr1	58269511	58271758	1	0	0	0	0	1	0	0	0	0	0	0	0
chr1	58295541	58297733	12	1	1	1	1	1	1	1	1	1	1	1	1
chr1	58298022	58298899	2	0	0	0	0	0	0	1	1	0	0	0	0
chr1	58303216	58305654	9	1	1	1	0	1	0	1	1	1	1	1	0
chr1	58339480	58342993	9	1	1	1	0	1	0	1	1	1	0	1	1
chr1	58358480	58360477	12	1	1	1	1	1	1	1	1	1	1	1	1
chr1	58362064	58365176	11	1	1	1	1	1	1	1	1	1	1	1	0
chr1	58365997	58368197	11	1	1	1	1	1	0	1	1	1	1	1	1
chr1	58407122	58412206	1	1	0	0	0	0	0	0	0	0	0	0	0
chr1	58582345	58583452	1	0	0	0	0	0	0	0	0	0	1	0	0
chr1	58741631	58743697	12	1	1	1	1	1	1	1	1	1	1	1	1
chr1	58769492	58770842	2	1	0	0	0	0	0	0	1	0	0	0	0
chr1	58794388	58796559	12	1	1	1	1	1	1	1	1	1	1	1	1
chr1	58856737	58857385	1	1	0	0	0	0	0	0	0	0	0	0	0
chr1	58858981	58861259	10	1	1	1	1	1	1	1	1	1	0	1	0
chr1	58950368	58954538	12	1	1	1	1	1	1	1	1	1	1	1	1
chr1	59020963	59022412	4	1	0	0	1	1	0	0	0	0	0	1	0
chr1	59161430	59165231	11	1	1	1	0	1	1	1	1	1	1	1	1
chr1	59256350	59258604	9	1	1	1	1	1	0	1	1	0	1	1	0
chr1	59268938	59272183	9	1	1	1	1	1	1	0	1	0	0	1	1
chr1	59276194	59279291	11	1	1	1	1	1	1	0	1	1	1	1	1
chr1	59330751	59336313	10	1	1	1	1	1	1	1	1	1	1	0	0
chr1	59337495	59338662	5	1	1	1	0	1	0	0	0	1	0	0	0
chr1	59409544	59411319	1	1	0	0	0	0	0	0	0	0	0	0	0
chr1	59422281	59423855	1	1	0	0	0	0	0	0	0	0	0	0	0
chr1	59447638	59451906	9	1	1	0	0	1	1	1	1	0	1	1	1
chr1	59458449	59459721	4	1	0	0	0	1	0	0	1	0	0	0	1
chr1	59463578	59467298	3	0	0	0	1	0	0	0	1	1	0	0	0
chr1	59486885	59489485	12	1	1	1	1	1	1	1	1	1	1	1	1
chr1	59508154	59509651	3	0	1	0	1	1	0	0	0	0	0	0	0
chr1	59520261	59520998	1	0	0	0	1	0	0	0	0	0	0	0	0
chr1	59523066	59525012	1	0	0	0	0	0	0	0	1	0	0	0	0
chr1	59548541	59550424	11	1	1	1	1	1	1	1	1	0	1	1	1
chr1	59564634	59568437	12	1	1	1	1	1	1	1	1	1	1	1	1
chr1	59577667	59580564	7	1	1	0	0	1	1	1	0	1	0	1	0
chr1	59583900	59586351	12	1	1	1	1	1	1	1	1	1	1	1	1
chr1	59603312	59604693	2	0	0	0	0	0	1	0	0	0	0	1	0
chr1	59609662	59610602	3	1	1	0	0	0	0	0	1	0	0	0	0
chr1	59622530	59624177	12	1	1	1	1	1	1	1	1	1	1	1	1
chr1	59832810	59835228	10	1	1	1	1	1	1	0	1	1	0	1	1
chr1	59886595	59887758	1	0	1	0	0	0	0	0	0	0	0	0	0
chr1	59915334	59917740	2	0	0	1	0	0	1	0	0	0	0	0	0
chr1	59943598	59944249	1	0	0	0	0	0	0	0	0	0	1	0	0
chr1	59998615	60000995	4	0	1	0	0	1	0	0	1	0	0	1	0
chr1	60158075	60158714	1	1	0	0	0	0	0	0	0	0	0	0	0
chr1	60427670	60429179	5	1	0	0	0	1	0	0	1	0	1	0	1
chr1	60657596	60659097	3	1	0	0	0	0	0	1	1	0	0	0	0
chr1	60703287	60705198	3	0	0	0	1	0	0	1	0	0	1	0	0
chr1	60714860	60716716	4	0	0	0	0	0	0	1	1	1	1	0	0
chr1	60717832	60719228	5	0	1	0	0	1	0	1	1	1	0	0	0
chr1	60732833	60735948	2	0	1	0	0	0	0	0	1	0	0	0	0
chr1	60744776	60746654	8	1	1	1	0	1	0	1	1	1	0	1	0
chr1	60777844	60779694	10	1	1	0	1	1	1	1	1	1	0	1	1
chr1	60845758	60846135	1	0	0	0	0	0	0	0	1	0	0	0	0
chr1	60862090	60864205	10	1	1	1	1	1	1	0	1	1	0	1	1
chr1	60908209	60909663	4	1	1	0	0	0	0	1	0	0	1	0	0
chr1	60935722	60936831	3	0	0	0	0	1	1	0	1	0	0	0	0
chr1	60960091	60961744	4	1	0	0	0	1	0	0	1	1	0	0	0
chr1	60993399	60995488	8	1	1	1	0	1	0	1	1	1	0	1	0
chr1	61029485	61031073	6	1	1	0	0	1	0	1	1	1	0	0	0
chr1	61041414	61044206	12	1	1	1	1	1	1	1	1	1	1	1	1
chr1	61053730	61056564	5	0	1	0	0	1	1	0	1	0	0	1	0
chr1	61115994	61118478	1	0	0	0	0	0	0	1	0	0	0	0	0
chr1	61136347	61138904	3	0	0	0	0	0	0	0	1	0	1	1	0
chr1	61140136	61144051	8	1	0	1	1	0	0	1	1	1	0	1	1
chr1	61145430	61147392	2	1	0	0	0	0	0	0	1	0	0	0	0
chr1	61148135	61150067	1	0	0	0	0	0	0	0	0	0	1	0	0
chr1	61156861	61158480	3	1	1	1	0	0	0	0	0	0	0	0	0
chr1	61202279	61204239	12	1	1	1	1	1	1	1	1	1	1	1	1
chr1	61294770	61296386	6	0	1	1	0	1	0	0	1	1	1	0	0
chr1	61296805	61299424	9	1	1	1	0	1	1	1	1	0	0	1	1
chr1	61300478	61302091	1	1	0	0	0	0	0	0	0	0	0	0	0
chr1	61319075	61322574	9	1	1	1	0	1	0	1	1	1	1	1	0
chr1	61375700	61380919	12	1	1	1	1	1	1	1	1	1	1	1	1
chr1	61406557	61407882	3	0	0	0	1	1	1	0	0	0	0	0	0
chr1	61497616	61499625	6	0	0	0	1	0	1	0	0	1	1	1	1
chr1	61513831	61515434	11	1	1	1	1	1	1	0	1	1	1	1	1
chr1	61527949	61530753	6	1	0	0	1	1	1	1	1	0	0	0	0
chr1	61552492	61553484	7	1	0	0	1	1	1	1	1	0	0	0	1
chr1	61586210	61587287	1	0	0	0	0	0	0	0	0	0	0	0	1
chr1	61771309	61771632	1	0	1	0	0	0	0	0	0	0	0	0	0
chr1	61927659	61928985	3	0	0	0	0	1	1	0	0	0	1	0	0
chr1	61933934	61936141	6	1	0	0	1	1	0	0	1	0	1	1	0
chr1	62084175	62085408	6	1	1	0	0	1	0	1	1	1	0	0	0
chr1	62085596	62086788	8	1	1	1	1	1	0	1	1	1	0	0	0
chr1	62140250	62141838	5	0	0	0	0	1	0	1	1	0	1	1	0
chr1	62154609	62158228	8	0	1	1	1	1	1	0	0	0	1	1	1
chr1	62243952	62245124	5	1	1	0	0	1	1	0	1	0	0	0	0
chr1	62295403	62296323	2	0	0	0	0	0	0	0	0	0	0	1	1
chr1	62382580	62383658	5	0	1	0	1	1	1	0	0	0	0	1	0
chr1	62444181	62445607	7	1	1	1	1	1	0	0	0	1	0	1	0
chr1	62446554	62448049	5	1	0	1	1	1	0	0	0	0	1	0	0
chr1	62527112	62528714	6	1	1	0	0	1	1	0	1	0	0	1	0
chr1	62547955	62553435	12	1	1	1	1	1	1	1	1	1	1	1	1
chr1	62579031	62580107	1	0	1	0	0	0	0	0	0	0	0	0	0
chr1	62588390	62593662	9	1	1	1	0	1	1	1	1	0	1	1	0
chr1	62631643	62632342	2	0	0	0	1	1	0	0	0	0	0	0	0
chr1	62647637	62649813	2	1	0	1	0	0	0	0	0	0	0	0	0
chr1	62695079	62697722	10	1	1	1	1	1	1	0	1	1	1	1	0
chr1	62698404	62699319	1	0	0	0	0	0	0	0	0	1	0	0	0
chr1	62700787	62701964	3	0	0	0	0	0	0	1	1	0	0	0	1
chr1	62709577	62710757	1	1	0	0	0	0	0	0	0	0	0	0	0
chr1	62712842	62713753	2	0	0	0	0	1	0	0	0	0	1	0	0
chr1	62715820	62722766	5	0	1	1	1	0	0	0	1	0	1	0	0
chr1	62759768	62761179	2	0	1	0	0	0	0	0	1	0	0	0	0
chr1	62763270	62764176	1	0	0	0	0	0	0	0	1	0	0	0	0
chr1	62764639	62774120	12	1	1	1	1	1	1	1	1	1	1	1	1
chr1	62777130	62778006	2	0	1	0	0	0	0	0	1	0	0	0	0
chr1	62780032	62782376	2	0	1	0	0	0	0	0	1	0	0	0	0
chr1	62793916	62796501	1	0	0	0	0	0	1	0	0	0	0	0	0
chr1	62813019	62813737	1	0	0	0	0	0	0	1	0	0	0	0	0
chr1	62860001	62861659	4	0	0	0	0	0	0	0	1	1	1	1	0
chr1	62884425	62886310	3	1	1	0	0	0	0	0	1	0	0	0	0
chr1	62887287	62888406	2	0	0	0	0	1	1	0	0	0	0	0	0
chr1	62963176	62967274	12	1	1	1	1	1	1	1	1	1	1	1	1
chr1	62984171	62985423	5	0	1	0	0	0	1	1	1	0	1	0	0
chr1	63128302	63132054	9	1	1	0	1	1	1	0	1	0	1	1	1
chr1	63182174	63183804	1	0	0	0	0	0	0	0	1	0	0	0	0
chr1	63203206	63204706	1	1	0	0	0	0	0	0	0	0	0	0	0
chr1	63213237	63215290	10	1	1	1	0	1	0	1	1	1	1	1	1
chr1	63246141	63249491	12	1	1	1	1	1	1	1	1	1	1	1	1
chr1	63270906	63275272	12	1	1	1	1	1	1	1	1	1	1	1	1
chr1	63490972	63491695	2	0	0	0	0	0	0	0	1	1	0	0	0
chr1	63517768	63518167	1	1	0	0	0	0	0	0	0	0	0	0	0
chr1	63551839	63554036	1	0	0	0	0	0	0	1	0	0	0	0	0
chr1	63657414	63660394	5	0	1	1	1	1	1	0	0	0	0	0	0
chr1	63704168	63707583	12	1	1	1	1	1	1	1	1	1	1	1	1
chr1	63767675	63769587	11	1	1	1	1	1	1	1	1	0	1	1	1
chr1	63776460	63777631	3	0	0	0	1	0	0	0	1	0	0	1	0
chr1	63803681	63804470	1	0	0	0	0	0	0	0	0	0	0	1	0
chr1	63886243	63887346	10	1	0	1	1	1	1	0	1	1	1	1	1
chr1	63952960	63954351	4	0	1	0	0	0	1	0	0	0	1	1	0
chr1	63986582	63989589	10	1	1	1	1	1	1	1	1	0	1	1	0
chr1	63993156	63996649	11	1	1	1	0	1	1	1	1	1	1	1	1
chr1	63998224	63999687	2	0	1	0	0	0	0	0	1	0	0	0	0
chr1	64003827	64006162	4	0	1	0	0	0	0	1	1	1	0	0	0
chr1	64018051	64020227	10	0	1	1	1	1	0	1	1	1	1	1	1
chr1	64059766	64062196	5	1	1	0	0	1	1	0	0	1	0	0	0
chr1	64100206	64102319	4	0	0	0	0	1	1	0	0	0	0	1	1
chr1	64163675	64165316	3	0	0	0	1	1	1	0	0	0	0	0	0
chr1	64187897	64190623	9	1	1	1	0	1	0	1	1	1	1	1	0
chr1	64191226	64192470	1	0	0	0	0	0	0	0	1	0	0	0	0
chr1	64224942	64227142	7	1	1	1	1	1	1	0	1	0	0	0	0
chr1	64288690	64289828	3	0	1	0	0	0	0	0	1	0	0	0	1
chr1	64301111	64302042	1	0	0	0	0	0	0	0	1	0	0	0	0
chr1	64304345	64306484	12	1	1	1	1	1	1	1	1	1	1	1	1
chr1	64419014	64420702	2	1	0	0	0	1	0	0	0	0	0	0	0
chr1	64447275	64449108	1	1	0	0	0	0	0	0	0	0	0	0	0
chr1	64521037	64523633	8	1	1	1	0	1	0	1	1	1	1	0	0
chr1	64622322	64625078	12	1	1	1	1	1	1	1	1	1	1	1	1
chr1	64648094	64650489	9	1	1	1	1	1	1	1	1	1	0	0	0
chr1	64675691	64677438	2	0	1	0	0	0	0	0	1	0	0	0	0
chr1	64704450	64706063	5	1	0	1	0	1	1	0	1	0	0	0	0
chr1	64716703	64718312	3	0	0	1	0	0	0	1	1	0	0	0	0
chr1	64754232	64758524	4	0	0	0	0	0	0	1	1	0	1	1	0
chr1	64774777	64775618	1	0	0	0	0	0	0	0	1	0	0	0	0
chr1	64793994	64797116	11	1	1	1	1	1	0	1	1	1	1	1	1
chr1	64798144	64801006	9	1	0	1	1	0	1	0	1	1	1	1	1
chr1	64806380	64810771	12	1	1	1	1	1	1	1	1	1	1	1	1
chr1	64822584	64824633	5	0	0	0	0	1	1	0	0	1	1	1	0
chr1	64826081	64827363	1	0	0	0	0	1	0	0	0	0	0	0	0
chr1	64835760	64837030	1	0	0	0	0	0	0	0	0	0	0	1	0
chr1	64843890	64851901	5	1	0	0	1	1	1	0	0	0	1	0	0
chr1	64874390	64877100	12	1	1	1	1	1	1	1	1	1	1	1	1
chr1	64915726	64920103	10	1	0	0	1	1	1	1	1	1	1	1	1
chr1	65001337	65002258	1	0	0	0	0	0	0	0	1	0	0	0	0
chr1	65048632	65049540	2	0	0	1	0	0	1	0	0	0	0	0	0
chr1	65111183	65114278	12	1	1	1	1	1	1	1	1	1	1	1	1
chr1	65164605	65166676	2	0	0	0	0	0	0	1	1	0	0	0	0
chr1	65244781	65246661	4	0	1	0	0	1	0	0	1	1	0	0	0
chr1	65281430	65283722	9	1	1	1	0	1	0	1	1	1	1	1	0
chr1	65310549	65313136	12	1	1	1	1	1	1	1	1	1	1	1	1
chr1	65354041	65354800	1	0	0	0	0	0	0	0	1	0	0	0	0
chr1	65385502	65391140	12	1	1	1	1	1	1	1	1	1	1	1	1
chr1	65572810	65573647	1	0	0	0	0	0	0	0	1	0	0	0	0
chr1	65687419	65688035	1	0	0	0	0	1	0	0	0	0	0	0	0
chr1	65931946	65933521	1	0	0	0	0	1	0	0	0	0	0	0	0
chr1	66105346	66105886	1	0	0	0	0	0	0	0	1	0	0	0	0
chr1	66115242	66116113	8	1	1	1	1	1	1	0	1	0	0	1	0
chr1	66120709	66121405	1	0	0	0	0	1	0	0	0	0	0	0	0
chr1	66164371	66165780	2	0	0	0	0	0	0	0	1	0	1	0	0
chr1	66177403	66179061	8	0	1	1	1	1	1	0	1	0	0	1	1
chr1	66244376	66245933	12	1	1	1	1	1	1	1	1	1	1	1	1
chr1	66277772	66278536	2	0	0	0	0	0	0	0	1	1	0	0	0
chr1	66279645	66281568	4	0	1	0	0	0	0	1	1	1	0	0	0
chr1	66282456	66282826	1	0	0	0	0	0	0	0	1	0	0	0	0
chr1	66304225	66305354	1	0	0	0	0	0	0	0	1	0	0	0	0
chr1	66328608	66330297	5	0	0	0	1	1	1	0	0	0	1	1	0
chr1	66361417	66363978	6	1	1	0	0	0	0	1	1	1	1	0	0
chr1	66369435	66369990	1	0	0	0	0	0	0	0	1	0	0	0	0
chr1	66371210	66371883	1	0	0	0	0	0	0	0	0	1	0	0	0
chr1	66428812	66431810	4	1	1	0	0	1	0	0	1	0	0	0	0
chr1	66549969	66551557	2	0	0	0	0	0	0	1	1	0	0	0	0
chr1	66560725	66563274	12	1	1	1	1	1	1	1	1	1	1	1	1
chr1	66596656	66599087	12	1	1	1	1	1	1	1	1	1	1	1	1
chr1	66636409	66638416	2	0	0	0	0	0	0	0	1	1	0	0	0
chr1	66643779	66644732	1	0	0	0	0	0	0	0	1	0	0	0	0
chr1	66647444	66651226	11	1	1	1	0	1	1	1	1	1	1	1	1
chr1	66837860	66839660	1	0	0	0	0	0	1	0	0	0	0	0	0
chr1	66895054	66898635	5	1	1	0	0	1	0	0	1	0	0	1	0
chr1	66940207	66941815	5	1	1	0	1	1	0	0	1	0	0	0	0
chr1	66984978	66986332	1	1	0	0	0	0	0	0	0	0	0	0	0
chr1	67002773	67005494	4	0	1	1	0	1	0	0	1	0	0	0	0
chr1	67031308	67032793	5	0	1	1	1	1	1	0	0	0	0	0	0
chr1	67043958	67045824	12	1	1	1	1	1	1	1	1	1	1	1	1
chr1	67049013	67050284	5	1	1	1	0	1	0	0	1	0	0	0	0
chr1	67113432	67114071	1	0	0	0	0	0	0	0	1	0	0	0	0
chr1	67143454	67144227	1	1	0	0	0	0	0	0	0	0	0	0	0
chr1	67181117	67182579	1	0	0	0	0	1	0	0	0	0	0	0	0
chr1	67183661	67185199	12	1	1	1	1	1	1	1	1	1	1	1	1
chr1	67226725	67229044	3	0	0	0	0	1	0	0	1	1	0	0	0
chr1	67306806	67308300	1	1	0	0	0	0	0	0	0	0	0	0	0
chr1	67397356	67398486	3	1	0	0	0	0	0	0	1	1	0	0	0
chr1	67639771	67641199	8	1	1	1	0	1	0	1	1	1	0	1	0
chr1	67643511	67643972	1	0	0	0	0	0	0	0	1	0	0	0	0
chr1	68049814	68050972	2	0	0	0	0	1	0	0	0	0	0	1	0
chr1	68086067	68087233	1	0	0	0	0	0	0	0	0	1	0	0	0
chr1	68674520	68675374	1	1	0	0	0	0	0	0	0	0	0	0	0
chr1	68723641	68724816	1	0	0	0	0	0	0	0	0	0	1	0	0
chr1	68955188	68956196	3	0	0	0	0	0	0	0	1	1	0	1	0
chr1	68973138	68976158	9	0	1	1	1	1	0	0	1	1	1	1	1
chr1	69018998	69020230	1	1	0	0	0	0	0	0	0	0	0	0	0
chr1	69031942	69032294	1	0	0	0	0	0	0	0	0	1	0	0	0
chr1	69104383	69109819	12	1	1	1	1	1	1	1	1	1	1	1	1
chr1	69138319	69139717	4	1	0	1	0	1	0	0	1	0	0	0	0
chr1	69231518	69232591	4	0	0	0	0	0	1	0	0	0	1	1	1
chr1	69276835	69277960	1	0	0	0	0	0	0	0	1	0	0	0	0
chr1	69318810	69320878	7	1	1	0	1	1	1	0	1	0	0	1	0
chr1	69367221	69369065	3	0	1	0	0	0	0	0	1	1	0	0	0
chr1	69591039	69592940	6	1	1	0	0	1	1	0	1	0	0	1	0
chr1	69597183	69598984	4	1	0	0	0	1	0	0	1	1	0	0	0
chr1	69610291	69611746	1	1	0	0	0	0	0	0	0	0	0	0	0
chr1	69657761	69658781	2	1	0	0	0	0	0	0	1	0	0	0	0
chr1	70475003	70476672	3	0	0	0	0	0	0	1	0	1	0	1	0
chr1	70634953	70635540	1	0	0	0	0	0	0	0	0	0	0	1	0
chr1	70776777	70778384	3	1	1	0	0	0	0	0	1	0	0	0	0
chr1	70882326	70883803	1	0	0	0	0	0	0	0	1	0	0	0	0
chr1	71003358	71005136	6	0	0	1	0	1	0	0	1	1	1	1	0
chr1	71079235	71079621	1	0	0	0	0	0	0	1	0	0	0	0	0
chr1	71098078	71099464	1	0	0	0	0	0	0	0	1	0	0	0	0
chr1	71109186	71110680	7	1	0	0	1	1	1	0	0	0	1	1	1
chr1	71383534	71384923	1	0	0	0	0	0	0	1	0	0	0	0	0
chr1	71527653	71532251	12	1	1	1	1	1	1	1	1	1	1	1	1
chr1	71566763	71569449	10	1	1	1	1	1	1	0	1	0	1	1	1
chr1	71663325	71664694	4	0	1	0	0	1	0	0	1	1	0	0	0
chr1	71667264	71668325	1	0	0	0	0	0	0	0	1	0	0	0	0
chr1	71683521	71684709	1	1	0	0	0	0	0	0	0	0	0	0	0
chr1	71690760	71692749	9	1	1	1	0	1	0	1	1	1	1	1	0
chr1	71722993	71724229	2	0	0	0	0	0	0	0	1	1	0	0	0
chr1	71751870	71753322	8	1	1	0	0	1	0	1	1	1	1	1	0
chr1	71754507	71758367	7	1	1	0	0	1	0	1	1	1	0	1	0
chr1	71800135	71802660	1	0	0	0	0	1	0	0	0	0	0	0	0
chr1	71804994	71806266	1	0	1	0	0	0	0	0	0	0	0	0	0
chr1	71824000	71825092	1	0	0	0	0	0	0	0	1	0	0	0	0
chr1	71827223	71828592	3	0	1	0	0	1	0	0	1	0	0	0	0
chr1	71844589	71846145	9	1	1	1	1	1	1	1	1	0	0	1	0
chr1	71865031	71866358	5	1	1	1	0	0	0	1	1	0	0	0	0
chr1	71879970	71881968	12	1	1	1	1	1	1	1	1	1	1	1	1
chr1	71886783	71888742	8	1	1	1	0	1	0	0	1	1	0	1	1
chr1	71891700	71894871	12	1	1	1	1	1	1	1	1	1	1	1	1
chr1	71935813	71938508	1	1	0	0	0	0	0	0	0	0	0	0	0
chr1	71944598	71945892	5	1	1	1	0	0	0	0	1	1	0	0	0
chr1	71967464	71968615	1	0	0	0	0	0	0	0	1	0	0	0	0
chr1	71991209	71991960	1	0	0	0	0	0	0	0	1	0	0	0	0
chr1	72001620	72004121	8	1	1	0	1	1	1	0	1	0	0	1	1
chr1	72016743	72019969	12	1	1	1	1	1	1	1	1	1	1	1	1
chr1	72036772	72039002	9	1	1	1	0	1	0	1	1	1	1	1	0
chr1	72061208	72063129	1	0	0	0	0	0	0	0	0	1	0	0	0
chr1	72099186	72099938	1	0	0	0	0	0	0	0	1	0	0	0	0
chr1	72108274	72109550	4	0	1	1	1	0	1	0	0	0	0	0	0
chr1	72113587	72114719	2	0	1	0	0	0	0	0	1	0	0	0	0
chr1	72121500	72125020	12	1	1	1	1	1	1	1	1	1	1	1	1
chr1	72172838	72175197	9	1	1	0	0	1	0	1	1	1	1	1	1
chr1	72181854	72188964	12	1	1	1	1	1	1	1	1	1	1	1	1
chr1	72309208	72311001	2	0	1	1	0	0	0	0	0	0	0	0	0
chr1	72352406	72353131	1	0	0	0	0	0	0	0	1	0	0	0	0
chr1	72375112	72376544	4	0	1	0	0	0	0	1	1	1	0	0	0
chr1	72379429	72380274	5	1	0	0	0	1	0	0	1	1	0	1	0
chr1	72382750	72385364	5	0	0	0	1	1	1	0	1	0	0	1	0
chr1	72427256	72430482	12	1	1	1	1	1	1	1	1	1	1	1	1
chr1	72449089	72451542	10	1	1	0	1	1	0	1	1	1	1	1	1
chr1	72564369	72565040	1	0	0	0	0	0	0	0	1	0	0	0	0
chr1	72576069	72579054	7	1	0	0	0	1	1	0	1	1	1	1	0
chr1	72598535	72601720	11	1	1	1	1	1	1	1	1	0	1	1	1
chr1	72715521	72719677	4	1	0	0	1	1	0	0	1	0	0	0	0
chr1	72720116	72720974	1	0	1	0	0	0	0	0	0	0	0	0	0
chr1	72728076	72732215	7	1	1	0	0	1	1	0	1	0	1	1	0
chr1	72839290	72840518	2	0	1	0	0	0	0	0	1	0	0	0	0
chr1	72864549	72867073	5	1	1	0	1	1	0	1	0	0	0	0	0
chr1	72868515	72877459	12	1	1	1	1	1	1	1	1	1	1	1	1
chr1	72877675	72879594	12	1	1	1	1	1	1	1	1	1	1	1	1
chr1	72885169	72886408	7	1	0	1	0	1	1	1	1	0	0	1	0
chr1	72944314	72946944	1	0	0	0	0	0	0	0	1	0	0	0	0
chr1	72952571	72953503	5	0	1	1	1	1	0	0	1	0	0	0	0
chr1	72962944	72964431	12	1	1	1	1	1	1	1	1	1	1	1	1
chr1	72965791	72970886	3	0	0	0	0	0	0	0	1	1	1	0	0
chr1	73060616	73062932	12	1	1	1	1	1	1	1	1	1	1	1	1
chr1	73122205	73123757	2	0	1	0	0	0	0	0	1	0	0	0	0
chr1	73129160	73131136	1	0	0	0	0	1	0	0	0	0	0	0	0
chr1	73189741	73192295	12	1	1	1	1	1	1	1	1	1	1	1	1
chr1	73212489	73213911	1	0	0	0	0	0	0	0	1	0	0	0	0
chr1	73241289	73243721	2	1	0	0	0	0	0	1	0	0	0	0	0
chr1	73250975	73253612	11	1	1	1	1	1	1	0	1	1	1	1	1
chr1	73270419	73271202	2	0	0	0	0	1	0	0	0	0	0	1	0
chr1	73323926	73324517	1	0	0	0	0	0	0	0	0	0	0	1	0
chr1	73361111	73365562	12	1	1	1	1	1	1	1	1	1	1	1	1
chr1	73393308	73397802	11	1	1	1	1	1	0	1	1	1	1	1	1
chr1	73409758	73411522	4	1	0	0	0	0	0	0	0	0	1	1	1
chr1	73459569	73461465	5	1	1	1	0	1	0	0	1	0	0	0	0
chr1	73495164	73496896	5	0	1	0	0	0	0	1	1	1	1	0	0
chr1	73506843	73509281	12	1	1	1	1	1	1	1	1	1	1	1	1
chr1	73513834	73515262	2	0	0	0	0	0	0	1	1	0	0	0	0
chr1	73537748	73539450	5	1	1	0	0	1	1	0	1	0	0	0	0
chr1	73541017	73542019	2	0	0	0	1	0	1	0	0	0	0	0	0
chr1	73575713	73578247	1	1	0	0	0	0	0	0	0	0	0	0	0
chr1	73583182	73584738	2	1	0	1	0	0	0	0	0	0	0	0	0
chr1	73599473	73600176	2	0	0	0	1	1	0	0	0	0	0	0	0
chr1	73644122	73644641	1	0	0	0	0	0	0	0	0	1	0	0	0
chr1	73655019	73656035	2	0	1	0	0	0	0	0	1	0	0	0	0
chr1	73682051	73684196	7	1	1	1	0	1	0	1	1	1	0	0	0
chr1	73702151	73703248	1	1	0	0	0	0	0	0	0	0	0	0	0
chr1	73758276	73759408	1	0	0	0	0	0	1	0	0	0	0	0	0
chr1	73796630	73800258	11	1	1	1	1	1	1	0	1	1	1	1	1
chr1	73900801	73904464	12	1	1	1	1	1	1	1	1	1	1	1	1
chr1	73905478	73907397	1	0	1	0	0	0	0	0	0	0	0	0	0
chr1	73941557	73945632	8	1	1	1	0	1	1	1	1	1	0	0	0
chr1	73946967	73948301	2	0	0	0	0	0	0	1	1	0	0	0	0
chr1	73952254	73960329	12	1	1	1	1	1	1	1	1	1	1	1	1
chr1	73960788	73964858	12	1	1	1	1	1	1	1	1	1	1	1	1
chr1	73966066	73971408	12	1	1	1	1	1	1	1	1	1	1	1	1
chr1	73985847	73987091	2	1	0	0	0	0	0	0	1	0	0	0	0
chr1	73992154	74003190	12	1	1	1	1	1	1	1	1	1	1	1	1
chr1	74006346	74010272	12	1	1	1	1	1	1	1	1	1	1	1	1
chr1	74011343	74018905	12	1	1	1	1	1	1	1	1	1	1	1	1
chr1	74025778	74030236	6	0	0	0	1	0	0	0	1	1	1	1	1
chr1	74033003	74038424	11	1	1	1	1	1	1	1	1	1	1	1	0
chr1	74039379	74044178	12	1	1	1	1	1	1	1	1	1	1	1	1
chr1	74051651	74055273	11	1	1	1	1	1	1	1	1	0	1	1	1
chr1	74065585	74067410	4	0	0	1	1	0	0	1	0	0	0	0	1
chr1	74081506	74086466	12	1	1	1	1	1	1	1	1	1	1	1	1
chr1	74088390	74093572	11	1	1	1	1	1	1	1	1	0	1	1	1
chr1	74094034	74095542	6	1	1	0	1	1	1	0	0	0	0	0	1
chr1	74120409	74123501	4	0	0	1	0	0	0	0	0	1	0	1	1
chr1	74247824	74250948	12	1	1	1	1	1	1	1	1	1	1	1	1
chr1	74273335	74283493	11	1	1	1	1	1	1	1	0	1	1	1	1
chr1	74286350	74291764	8	0	1	1	1	1	1	1	0	1	0	1	0
chr1	74301083	74306610	12	1	1	1	1	1	1	1	1	1	1	1	1
chr1	74361629	74364840	11	1	1	1	1	1	1	1	1	0	1	1	1
chr1	74367034	74369135	12	1	1	1	1	1	1	1	1	1	1	1	1
chr1	74375290	74376977	1	1	0	0	0	0	0	0	0	0	0	0	0
chr1	74422680	74423954	1	0	0	0	0	0	0	0	1	0	0	0	0
chr1	74431836	74432962	1	0	0	0	0	0	0	0	1	0	0	0	0
chr1	74490460	74491456	2	0	0	0	0	0	0	1	1	0	0	0	0
chr1	74542186	74543263	2	0	0	0	0	0	0	0	1	0	0	1	0
chr1	74711906	74714837	12	1	1	1	1	1	1	1	1	1	1	1	1
chr1	74747439	74750494	12	1	1	1	1	1	1	1	1	1	1	1	1
chr1	74768757	74775111	12	1	1	1	1	1	1	1	1	1	1	1	1
chr1	74775540	74776758	1	0	0	0	0	0	0	0	0	0	0	0	1
chr1	74780373	74785124	12	1	1	1	1	1	1	1	1	1	1	1	1
chr1	74786939	74795699	11	1	1	0	1	1	1	1	1	1	1	1	1
chr1	74800191	74802088	10	1	0	0	1	1	1	1	1	1	1	1	1
chr1	74804576	74809536	10	0	1	1	1	1	0	1	1	1	1	1	1
chr1	74880318	74883830	12	1	1	1	1	1	1	1	1	1	1	1	1
chr1	74883961	74886797	8	1	1	0	0	1	1	1	0	0	1	1	1
chr1	74891600	74894554	5	1	0	0	0	0	0	1	1	0	1	1	0
chr1	74899096	74902793	11	1	1	0	1	1	1	1	1	1	1	1	1
chr1	74945905	74953226	12	1	1	1	1	1	1	1	1	1	1	1	1
chr1	74963564	74966099	12	1	1	1	1	1	1	1	1	1	1	1	1
chr1	75005872	75006426	1	0	0	0	1	0	0	0	0	0	0	0	0
chr1	75013144	75017512	12	1	1	1	1	1	1	1	1	1	1	1	1
chr1	75024535	75025518	1	0	0	0	0	0	0	0	1	0	0	0	0
chr1	75031620	75033429	4	0	0	0	0	0	1	0	1	0	0	1	1
chr1	75040066	75041590	9	1	1	0	1	1	1	0	1	0	1	1	1
chr1	75208594	75209911	3	0	0	0	1	0	0	0	0	1	0	0	1
chr1	75215115	75220687	12	1	1	1	1	1	1	1	1	1	1	1	1
chr1	75243463	75248855	7	1	0	0	1	1	1	1	0	0	1	0	1
chr1	75250312	75255968	12	1	1	1	1	1	1	1	1	1	1	1	1
chr1	75262655	75264698	12	1	1	1	1	1	1	1	1	1	1	1	1
chr1	75335755	75341292	12	1	1	1	1	1	1	1	1	1	1	1	1
chr1	75341831	75346414	10	1	1	1	1	1	1	0	1	0	1	1	1
chr1	75358148	75362321	12	1	1	1	1	1	1	1	1	1	1	1	1
chr1	75373886	75376522	11	1	1	1	1	1	1	1	1	0	1	1	1
chr1	75379733	75390171	12	1	1	1	1	1	1	1	1	1	1	1	1
chr1	75390913	75395050	12	1	1	1	1	1	1	1	1	1	1	1	1
chr1	75398092	75402448	12	1	1	1	1	1	1	1	1	1	1	1	1
chr1	75403414	75405231	1	0	0	0	0	0	0	0	0	0	0	1	0
chr1	75420777	75424692	12	1	1	1	1	1	1	1	1	1	1	1	1
chr1	75441272	75454855	12	1	1	1	1	1	1	1	1	1	1	1	1
chr1	75455362	75460005	12	1	1	1	1	1	1	1	1	1	1	1	1
chr1	75460438	75463171	12	1	1	1	1	1	1	1	1	1	1	1	1
chr1	75466160	75469920	12	1	1	1	1	1	1	1	1	1	1	1	1
chr1	75471800	75476962	3	0	1	0	0	0	0	0	0	1	0	0	1
chr1	75494945	75497616	5	0	0	1	1	1	1	0	0	0	1	0	0
chr1	75509359	75510325	1	0	0	0	0	0	1	0	0	0	0	0	0
chr1	75608014	75610383	3	0	0	0	1	1	1	0	0	0	0	0	0
chr1	75651406	75654271	9	0	1	0	1	1	1	1	1	0	1	1	1
chr1	75713618	75715437	12	1	1	1	1	1	1	1	1	1	1	1	1
chr1	75772376	75773513	1	0	0	0	0	0	0	0	0	0	0	1	0
chr1	75832374	75834859	10	1	1	1	1	1	1	0	1	0	1	1	1
chr1	75837985	75840619	3	1	0	0	1	0	1	0	0	0	0	0	0
chr1	75843381	75846174	7	1	1	1	1	1	0	0	1	0	0	0	1
chr1	75886386	75887252	1	0	0	0	0	0	0	1	0	0	0	0	0
chr1	75933409	75934595	3	0	1	0	0	0	0	0	1	1	0	0	0
chr1	75974031	75975917	10	1	1	1	1	1	1	0	1	0	1	1	1
chr1	76022669	76026230	10	1	1	1	0	1	1	1	1	1	1	1	0
chr1	76048662	76050452	7	1	1	1	1	1	1	0	0	0	1	0	0
chr1	76064604	76066845	2	0	0	0	0	0	1	0	1	0	0	0	0
chr1	76078791	76080500	1	0	0	0	0	0	0	0	0	0	1	0	0
chr1	76142580	76144144	2	0	0	0	0	1	0	0	0	0	1	0	0
chr1	76168860	76170489	7	1	1	1	1	1	1	0	0	0	0	1	0
chr1	76194519	76196900	9	1	1	1	1	1	1	0	1	1	0	0	1
chr1	76246201	76247348	1	0	0	0	0	0	0	1	0	0	0	0	0
chr1	76528738	76531325	4	0	0	1	1	1	1	0	0	0	0	0	0
chr1	76570263	76571854	11	1	1	1	1	1	1	0	1	1	1	1	1
chr1	76575458	76576373	2	0	0	0	1	0	1	0	0	0	0	0	0
chr1	76662238	76665357	4	1	0	0	1	1	1	0	0	0	0	0	0
chr1	76829039	76830303	6	0	0	1	0	1	1	1	0	0	1	0	1
chr1	76834778	76836416	4	0	0	0	1	1	0	1	1	0	0	0	0
chr1	76894919	76897571	4	1	0	0	1	1	1	0	0	0	0	0	0
chr1	76924174	76925622	3	0	0	0	1	1	1	0	0	0	0	0	0
chr1	76980127	76982033	3	1	0	0	0	0	0	1	1	0	0	0	0
chr1	77011694	77013032	4	1	0	0	1	1	1	0	0	0	0	0	0
chr1	77037893	77038602	3	0	1	0	0	1	1	0	0	0	0	0	0
chr1	77068478	77069902	1	1	0	0	0	0	0	0	0	0	0	0	0
chr1	77156901	77157597	2	0	0	0	0	1	0	0	1	0	0	0	0
chr1	77181229	77182812	2	0	0	0	0	1	0	0	0	0	0	1	0
chr1	77219412	77221547	10	1	1	1	1	1	1	0	1	0	1	1	1
chr1	77282779	77283503	1	0	0	0	0	0	0	0	1	0	0	0	0
chr1	77349155	77350712	8	1	1	1	0	1	0	0	1	1	0	1	1
chr1	77380431	77381842	5	1	1	0	0	1	0	0	1	0	0	1	0
chr1	77384431	77389049	7	1	1	0	0	0	1	1	1	1	1	0	0
chr1	77419035	77420539	4	1	0	0	0	1	0	0	0	0	0	1	1
chr1	77439474	77440753	1	0	0	0	0	0	0	0	1	0	0	0	0
chr1	77488939	77490924	7	1	1	0	0	1	0	0	1	1	1	0	1
chr1	77502786	77505141	6	1	1	0	0	0	1	1	1	0	0	1	0
chr1	77507428	77508216	1	0	0	0	0	0	0	0	0	1	0	0	0
chr1	77839742	77841290	4	1	1	1	0	0	1	0	0	0	0	0	0
chr1	77964202	77966254	12	1	1	1	1	1	1	1	1	1	1	1	1
chr1	77978588	77979972	6	0	1	0	0	1	1	0	1	1	0	1	0
chr1	78007799	78011930	12	1	1	1	1	1	1	1	1	1	1	1	1
chr1	78015426	78018321	6	1	1	0	1	1	1	0	0	0	0	1	0
chr1	78131296	78132505	1	0	0	0	0	1	0	0	0	0	0	0	0
chr1	78188621	78191193	12	1	1	1	1	1	1	1	1	1	1	1	1
chr1	78191701	78205579	12	1	1	1	1	1	1	1	1	1	1	1	1
chr1	78215395	78219450	12	1	1	1	1	1	1	1	1	1	1	1	1
chr1	78222329	78224573	10	1	1	1	0	1	1	1	1	1	1	1	0
chr1	78231370	78233332	10	1	1	1	1	1	1	0	0	1	1	1	1
chr1	78233559	78235769	12	1	1	1	1	1	1	1	1	1	1	1	1
chr1	78324909	78327128	3	0	0	0	0	1	0	0	1	0	0	1	0
chr1	78394970	78397155	11	1	1	1	1	1	1	1	1	1	1	1	0
chr1	78419357	78420698	1	0	0	0	0	0	0	0	1	0	0	0	0
chr1	78451046	78452082	1	0	0	0	0	1	0	0	0	0	0	0	0
chr1	78511035	78512252	8	0	1	0	1	1	1	1	1	0	0	1	1
chr1	78525331	78525849	1	0	0	0	0	0	0	0	1	0	0	0	0
chr1	78553758	78554851	5	1	1	1	0	0	0	0	0	0	0	1	1
chr1	78567133	78569018	3	1	1	1	0	0	0	0	0	0	0	0	0
chr1	78585071	78585661	2	0	1	0	0	0	0	0	1	0	0	0	0
chr1	78648796	78649996	2	0	0	0	0	0	0	0	1	1	0	0	0
chr1	78723799	78727376	12	1	1	1	1	1	1	1	1	1	1	1	1
chr1	78781537	78782229	2	0	1	0	1	0	0	0	0	0	0	0	0
chr1	78800117	78801623	1	0	0	0	0	0	0	0	0	0	0	0	1
chr1	78863741	78865296	4	0	1	1	0	0	0	1	1	0	0	0	0
chr1	78888988	78889808	3	0	1	0	0	1	0	0	1	0	0	0	0
chr1	79143938	79144546	1	0	0	0	0	0	0	0	1	0	0	0	0
chr1	79655066	79658750	7	1	1	0	0	1	0	1	1	1	1	0	0
chr1	79756343	79758099	3	0	1	1	0	0	0	0	1	0	0	0	0
chr1	79758445	79760289	8	0	0	1	1	1	1	0	1	1	1	1	0
chr1	79806065	79807894	7	0	1	0	0	1	1	1	1	1	0	1	0
chr1	79821385	79825566	11	1	1	1	0	1	1	1	1	1	1	1	1
chr1	79839171	79841665	8	1	1	0	1	1	1	1	0	0	1	1	0
chr1	79860539	79862621	1	0	0	0	0	0	1	0	0	0	0	0	0
chr1	79869460	79870680	1	0	0	0	0	0	0	0	0	0	0	1	0
chr1	79889709	79891340	3	0	0	0	0	0	0	0	1	1	0	1	0
chr1	79931723	79934265	9	1	1	1	0	1	0	1	1	1	0	1	1
chr1	79976743	79980815	12	1	1	1	1	1	1	1	1	1	1	1	1
chr1	79982762	79983770	1	0	1	0	0	0	0	0	0	0	0	0	0
chr1	79995510	79996726	1	0	0	0	0	1	0	0	0	0	0	0	0
chr1	80007867	80009781	1	0	0	0	0	1	0	0	0	0	0	0	0
chr1	80123568	80124737	3	1	0	0	0	0	0	1	0	1	0	0	0
chr1	80174062	80175115	1	0	0	0	0	0	0	0	1	0	0	0	0
chr1	80180287	80181677	1	0	0	0	0	0	0	0	1	0	0	0	0
chr1	80219432	80222253	7	1	0	0	1	1	1	0	0	0	1	1	1
chr1	80239253	80241021	1	1	0	0	0	0	0	0	0	0	0	0	0
chr1	80383228	80385411	5	1	0	0	0	0	1	0	0	1	1	1	0
chr1	80397744	80398309	2	0	0	0	0	0	0	0	1	0	0	1	0
chr1	80482326	80484878	8	1	1	1	0	1	0	1	1	1	0	0	1
chr1	80636536	80638412	10	1	1	1	1	1	1	0	1	0	1	1	1
chr1	80708307	80711988	10	1	1	1	0	1	1	1	1	1	0	1	1
chr1	80729232	80731077	7	1	1	0	0	1	0	0	1	1	0	1	1
chr1	80736578	80738489	8	1	1	1	0	1	1	0	1	0	1	1	0
chr1	81280206	81281796	5	1	1	0	0	1	0	0	1	0	0	1	0
chr1	81309404	81310569	6	1	1	0	0	1	0	0	1	1	1	0	0
chr1	81316201	81317913	6	1	1	0	0	1	1	0	1	1	0	0	0
chr1	81419709	81420729	1	0	0	0	0	0	0	0	0	0	0	1	0
chr1	81536797	81538355	3	1	0	0	0	0	0	0	1	0	0	1	0
chr1	81717497	81719214	3	1	1	0	0	0	0	0	1	0	0	0	0
chr1	81743840	81747217	9	1	1	1	1	1	1	0	1	1	0	1	0
chr1	81864603	81865449	1	0	0	0	0	0	0	0	1	0	0	0	0
chr1	81903578	81905685	10	1	1	1	0	1	0	1	1	1	1	1	1
chr1	81924688	81926262	12	1	1	1	1	1	1	1	1	1	1	1	1
chr1	81950778	81953593	11	1	1	1	0	1	1	1	1	1	1	1	1
chr1	81966984	81968532	2	0	0	0	0	0	0	0	1	1	0	0	0
chr1	82001128	82003671	11	1	1	1	0	1	1	1	1	1	1	1	1
chr1	82007774	82010054	5	1	1	0	0	0	0	0	1	1	0	1	0
chr1	82129527	82130394	1	0	0	1	0	0	0	0	0	0	0	0	0
chr1	82135890	82137180	1	0	0	0	0	0	1	0	0	0	0	0	0
chr1	82188273	82191062	12	1	1	1	1	1	1	1	1	1	1	1	1
chr1	82198565	82204832	11	1	1	1	0	1	1	1	1	1	1	1	1
chr1	82222592	82225271	12	1	1	1	1	1	1	1	1	1	1	1	1
chr1	82244349	82245928	8	1	1	0	0	1	1	0	1	0	1	1	1
chr1	82256903	82259487	2	0	0	0	0	1	0	0	1	0	0	0	0
chr1	82344877	82346318	5	0	1	0	0	0	0	1	1	1	0	1	0
chr1	82357903	82365185	12	1	1	1	1	1	1	1	1	1	1	1	1
chr1	82406417	82408889	9	1	0	1	1	1	1	0	1	0	1	1	1
chr1	82410449	82412547	1	0	0	0	0	0	0	0	0	0	0	1	0
chr1	82452771	82454190	2	0	0	0	1	0	0	0	0	0	0	1	0
chr1	82482155	82483532	2	0	1	0	0	0	0	0	1	0	0	0	0
chr1	82554441	82554670	1	0	0	0	0	0	0	0	0	1	0	0	0
chr1	82596732	82598225	9	1	1	1	0	1	1	0	1	1	0	1	1
chr1	82611933	82613764	7	1	1	1	0	1	0	0	1	0	0	1	1
chr1	82641218	82642311	7	1	0	0	1	1	0	1	1	0	1	1	0
chr1	82793385	82797564	10	1	1	1	0	1	0	1	1	1	1	1	1
chr1	82798183	82798921	2	0	0	0	0	0	0	1	1	0	0	0	0
chr1	82807476	82810995	12	1	1	1	1	1	1	1	1	1	1	1	1
chr1	82818356	82820949	12	1	1	1	1	1	1	1	1	1	1	1	1
chr1	82830823	82833180	9	1	1	1	0	1	0	1	1	1	1	1	0
chr1	82834205	82835541	5	0	1	0	0	0	0	1	1	1	0	1	0
chr1	82878382	82879699	4	0	1	0	0	0	0	0	1	1	0	1	0
chr1	82990563	82992010	3	0	1	1	0	0	0	0	1	0	0	0	0
chr1	83152693	83153606	1	0	0	1	0	0	0	0	0	0	0	0	0
chr1	83156424	83157529	1	0	0	0	0	0	0	0	1	0	0	0	0
chr1	83586839	83588161	4	1	1	1	0	0	0	0	1	0	0	0	0
chr1	83760363	83762495	8	1	1	0	0	1	0	1	1	1	0	1	1
chr1	83770383	83772963	10	1	1	1	0	1	1	1	1	1	1	1	0
chr1	83850285	83852049	3	1	0	1	0	0	0	0	1	0	0	0	0
chr1	83870431	83872081	6	1	0	0	1	1	1	0	0	0	0	1	1
chr1	83896660	83897977	1	0	1	0	0	0	0	0	0	0	0	0	0
chr1	84007499	84008620	5	1	1	1	0	0	0	0	1	1	0	0	0
chr1	84027670	84029457	3	0	0	1	0	1	0	0	1	0	0	0	0
chr1	84089076	84090911	5	1	0	1	1	1	1	0	0	0	0	0	0
chr1	84140977	84143245	5	1	0	0	0	1	0	0	1	0	1	1	0
chr1	84182094	84183779	9	1	1	1	0	1	0	1	1	1	0	1	1
chr1	84185704	84187952	12	1	1	1	1	1	1	1	1	1	1	1	1
chr1	84198593	84201373	5	1	1	1	0	0	0	0	1	1	0	0	0
chr1	84217396	84219590	12	1	1	1	1	1	1	1	1	1	1	1	1
chr1	84253410	84255184	6	1	1	0	0	1	1	1	1	0	0	0	0
chr1	84278393	84280386	1	0	0	0	0	0	0	0	1	0	0	0	0
chr1	84281422	84287812	12	1	1	1	1	1	1	1	1	1	1	1	1
chr1	84364002	84367239	1	0	0	0	0	0	0	0	1	0	0	0	0
chr1	84385976	84389003	11	1	1	1	0	1	1	1	1	1	1	1	1
chr1	84471501	84472482	1	0	0	0	0	0	1	0	0	0	0	0	0
chr1	84549082	84551472	4	0	0	0	1	1	1	0	0	0	0	0	1
chr1	84618510	84620116	2	1	0	1	0	0	0	0	0	0	0	0	0
chr1	84957985	84959245	1	0	0	0	0	0	0	0	1	0	0	0	0
chr1	84965419	84967335	3	1	0	0	0	0	0	0	0	0	0	1	1
chr1	84974969	84977558	2	0	0	0	0	0	0	0	1	1	0	0	0
chr1	84981939	84986626	3	0	0	0	1	0	0	0	1	1	0	0	0
chr1	84986974	84995768	12	1	1	1	1	1	1	1	1	1	1	1	1
chr1	85000992	85013509	11	1	1	1	1	1	1	0	1	1	1	1	1
chr1	85024050	85032890	11	1	1	1	1	1	1	1	1	1	0	1	1
chr1	85034632	85042196	2	0	0	0	0	0	0	0	0	1	0	0	1
chr1	85042781	85048554	6	0	0	0	0	1	1	0	1	1	0	1	1
chr1	85057121	85057991	6	1	1	0	1	0	0	0	1	0	1	1	0
chr1	85066617	85126954	12	1	1	1	1	1	1	1	1	1	1	1	1
chr1	85133578	85134360	1	0	0	0	0	0	0	0	0	0	0	0	1
chr1	85147131	85148408	12	1	1	1	1	1	1	1	1	1	1	1	1
chr1	85153119	85172219	12	1	1	1	1	1	1	1	1	1	1	1	1
chr1	85179030	85186666	11	1	1	1	1	1	1	0	1	1	1	1	1
chr1	85194277	85201141	10	1	0	1	1	1	1	0	1	1	1	1	1
chr1	85207948	85209939	4	0	0	0	1	0	0	0	1	1	0	0	1
chr1	85210158	85217250	5	0	0	0	0	0	1	0	1	1	0	1	1
chr1	85220633	85223886	4	0	0	0	1	0	1	0	0	0	0	1	1
chr1	85230507	85335130	12	1	1	1	1	1	1	1	1	1	1	1	1
chr1	85335484	85336551	1	0	0	0	0	0	0	0	0	1	0	0	0
chr1	85337869	85347046	12	1	1	1	1	1	1	1	1	1	1	1	1
chr1	85449250	85449901	1	0	0	0	0	0	0	0	0	1	0	0	0
chr1	85450701	85462695	11	1	1	1	1	1	1	0	1	1	1	1	1
chr1	85464366	85465835	8	1	0	0	1	0	1	0	1	1	1	1	1
chr1	85478686	85496344	12	1	1	1	1	1	1	1	1	1	1	1	1
chr1	85496904	85509094	11	1	1	1	1	1	1	0	1	1	1	1	1
chr1	85522734	85530411	6	0	0	0	1	0	1	0	1	1	0	1	1
chr1	85548053	85554410	10	1	1	1	0	1	1	0	1	1	1	1	1
chr1	85554803	85555891	7	0	1	0	1	0	1	0	1	1	0	1	1
chr1	85562342	85563869	1	0	0	0	0	0	0	0	0	1	0	0	0
chr1	85565138	85567090	5	1	0	0	0	0	1	0	1	1	0	0	1
chr1	85568332	85575438	8	0	0	1	1	0	1	0	1	1	1	1	1
chr1	85576859	85602210	12	1	1	1	1	1	1	1	1	1	1	1	1
chr1	85602473	85611960	12	1	1	1	1	1	1	1	1	1	1	1	1
chr1	85612444	85635464	12	1	1	1	1	1	1	1	1	1	1	1	1
chr1	85637525	85639908	1	0	0	0	0	0	0	0	0	1	0	0	0
chr1	85644826	85653921	8	1	1	1	0	0	1	0	1	1	0	1	1
chr1	85735077	85737548	11	1	1	1	1	1	0	1	1	1	1	1	1
chr1	85749773	85752682	5	1	1	0	0	0	0	0	1	1	0	1	0
chr1	85756324	85759231	6	0	1	0	0	0	0	1	1	1	0	1	1
chr1	85765583	85767166	2	0	0	0	0	0	0	0	1	0	0	1	0
chr1	85810289	85811481	1	0	0	0	0	0	0	0	1	0	0	0	0
chr1	85852250	85854932	6	1	1	0	1	1	1	0	1	0	0	0	0
chr1	85864270	85865133	4	0	0	0	0	0	1	1	0	0	1	1	0
chr1	85930712	85934787	5	0	1	0	0	1	0	1	1	1	0	0	0
chr1	85957563	85959000	2	0	0	0	0	0	0	0	0	1	0	1	0
chr1	86007321	86008090	1	0	0	0	0	0	0	0	1	0	0	0	0
chr1	86015671	86016032	1	0	0	0	0	0	0	0	0	0	1	0	0
chr1	86178868	86181679	12	1	1	1	1	1	1	1	1	1	1	1	1
chr1	86213775	86215485	3	0	0	0	1	1	0	0	0	0	1	0	0
chr1	86238906	86241189	1	1	0	0	0	0	0	0	0	0	0	0	0
chr1	86261422	86262812	1	0	0	0	0	0	0	0	1	0	0	0	0
chr1	86281168	86282654	2	1	0	0	0	0	0	0	1	0	0	0	0
chr1	86293920	86295570	9	1	1	1	0	1	1	0	1	1	0	1	1
chr1	86301279	86306942	12	1	1	1	1	1	1	1	1	1	1	1	1
chr1	86338161	86344644	7	1	1	0	1	1	0	1	1	1	0	0	0
chr1	86371671	86372797	3	0	0	0	1	1	1	0	0	0	0	0	0
chr1	86377951	86380491	10	1	0	1	1	1	1	1	1	0	1	1	1
chr1	86388507	86390160	12	1	1	1	1	1	1	1	1	1	1	1	1
chr1	86419444	86422021	8	0	0	1	0	1	1	1	1	0	1	1	1
chr1	86422995	86424365	1	0	0	0	0	1	0	0	0	0	0	0	0
chr1	86429784	86430644	1	0	0	0	1	0	0	0	0	0	0	0	0
chr1	86447636	86448627	1	0	0	0	0	0	0	0	1	0	0	0	0
chr1	86469192	86473518	12	1	1	1	1	1	1	1	1	1	1	1	1
chr1	86490683	86493547	11	1	1	1	0	1	1	1	1	1	1	1	1
chr1	86508958	86510473	3	0	0	0	0	0	0	0	1	0	1	1	0
chr1	86521326	86523710	5	1	0	0	0	1	0	1	1	0	0	1	0
chr1	86598094	86600295	3	0	0	0	1	1	1	0	0	0	0	0	0
chr1	86617595	86619697	2	1	0	0	0	0	0	0	1	0	0	0	0
chr1	86621783	86624968	12	1	1	1	1	1	1	1	1	1	1	1	1
chr1	86632419	86633873	1	0	0	1	0	0	0	0	0	0	0	0	0
chr1	86641340	86644759	12	1	1	1	1	1	1	1	1	1	1	1	1
chr1	86912595	86915077	10	1	1	1	0	1	0	1	1	1	1	1	1
chr1	87028533	87029363	1	0	0	0	0	0	0	0	0	0	0	0	1
chr1	87029997	87031651	9	1	1	1	1	1	0	0	1	1	1	1	0
chr1	87033848	87038316	12	1	1	1	1	1	1	1	1	1	1	1	1
chr1	87040045	87043422	12	1	1	1	1	1	1	1	1	1	1	1	1
chr1	87077416	87079031	1	0	0	0	0	0	0	0	1	0	0	0	0
chr1	87096688	87101191	12	1	1	1	1	1	1	1	1	1	1	1	1
chr1	87126782	87128484	4	0	0	0	0	0	0	1	0	0	1	1	1
chr1	87151291	87157866	12	1	1	1	1	1	1	1	1	1	1	1	1
chr1	87179753	87182341	9	0	0	1	1	1	1	1	1	1	0	1	1
chr1	87244722	87246800	12	1	1	1	1	1	1	1	1	1	1	1	1
chr1	87253570	87256178	6	1	0	1	0	0	0	1	1	1	1	0	0
chr1	87263243	87266635	12	1	1	1	1	1	1	1	1	1	1	1	1
chr1	87269995	87272959	12	1	1	1	1	1	1	1	1	1	1	1	1
chr1	87315744	87316456	1	0	0	0	0	0	0	0	1	0	0	0	0
chr1	87396547	87397957	8	1	1	1	0	1	1	1	1	0	1	0	0
chr1	87447233	87449173	5	1	1	0	0	0	0	0	1	0	0	1	1
chr1	87470028	87477329	12	1	1	1	1	1	1	1	1	1	1	1	1
chr1	87484189	87487019	5	0	1	0	0	0	0	0	1	1	0	1	1
chr1	87491993	87493361	1	0	0	0	0	0	0	0	1	0	0	0	0
chr1	87520857	87522268	2	0	1	0	0	0	0	0	1	0	0	0	0
chr1	87548292	87549963	3	1	0	0	0	0	0	1	1	0	0	0	0
chr1	87550494	87552456	12	1	1	1	1	1	1	1	1	1	1	1	1
chr1	87573156	87575087	3	0	0	0	0	0	0	1	1	1	0	0	0
chr1	87607375	87609709	3	0	0	0	0	0	0	1	1	0	0	1	0
chr1	87721303	87722995	5	0	1	0	0	0	0	0	1	1	0	1	1
chr1	87792598	87793549	1	0	0	0	0	0	0	0	1	0	0	0	0
chr1	87837000	87837762	7	1	1	1	0	1	0	1	1	0	0	1	0
chr1	87846073	87849754	12	1	1	1	1	1	1	1	1	1	1	1	1
chr1	87879467	87880519	1	0	0	0	0	1	0	0	0	0	0	0	0
chr1	87900643	87901904	8	1	0	0	0	1	0	1	1	1	1	1	1
chr1	87912733	87914813	7	1	1	1	0	1	0	1	1	1	0	0	0
chr1	88093958	88095862	2	1	0	0	0	0	0	0	0	0	0	1	0
chr1	88103062	88104300	2	0	0	1	0	0	0	0	1	0	0	0	0
chr1	88135333	88136318	1	0	0	0	0	0	0	0	1	0	0	0	0
chr1	88232736	88238114	1	0	0	0	0	0	0	0	0	0	0	0	1
chr1	88250736	88271866	4	0	0	0	0	0	1	0	0	1	0	1	1
chr1	88356527	88359400	6	1	0	1	1	1	1	0	0	1	0	0	0
chr1	88424018	88426246	6	1	1	0	1	1	1	0	0	0	0	0	1
chr1	88436413	88438925	11	1	1	0	1	1	1	1	1	1	1	1	1
chr1	88462046	88463382	1	0	0	0	0	0	1	0	0	0	0	0	0
chr1	88473116	88477112	12	1	1	1	1	1	1	1	1	1	1	1	1
chr1	88477241	88479071	4	1	0	0	0	1	0	1	1	0	0	0	0
chr1	88488258	88490917	5	1	1	1	0	0	0	0	1	1	0	0	0
chr1	88491554	88492496	1	0	0	0	0	0	1	0	0	0	0	0	0
chr1	88525396	88526963	3	0	0	0	0	1	0	0	1	0	1	0	0
chr1	88638704	88640521	11	1	1	1	1	1	0	1	1	1	1	1	1
chr1	88662541	88663468	6	1	1	0	0	1	0	0	1	1	0	1	0
chr1	88668106	88669301	2	0	0	0	0	0	1	0	0	0	0	1	0
chr1	88698930	88703343	12	1	1	1	1	1	1	1	1	1	1	1	1
chr1	88716912	88717994	3	0	0	0	1	1	1	0	0	0	0	0	0
chr1	88886420	88887468	1	1	0	0	0	0	0	0	0	0	0	0	0
chr1	88994379	88997358	11	1	1	1	1	1	1	1	1	0	1	1	1
chr1	89014410	89016746	12	1	1	1	1	1	1	1	1	1	1	1	1
chr1	89073896	89076137	2	1	0	0	1	0	0	0	0	0	0	0	0
chr1	89078201	89083868	12	1	1	1	1	1	1	1	1	1	1	1	1
chr1	89091431	89094991	12	1	1	1	1	1	1	1	1	1	1	1	1
chr1	89102311	89111239	12	1	1	1	1	1	1	1	1	1	1	1	1
chr1	89118954	89126224	12	1	1	1	1	1	1	1	1	1	1	1	1
chr1	89129978	89134510	12	1	1	1	1	1	1	1	1	1	1	1	1
chr1	89135317	89139260	5	0	0	0	1	1	1	1	0	0	1	0	0
chr1	89183250	89183867	1	1	0	0	0	0	0	0	0	0	0	0	0
chr1	89190064	89192598	7	1	0	1	1	1	0	1	1	0	1	0	0
chr1	89196188	89196721	1	0	0	0	0	1	0	0	0	0	0	0	0
chr1	89244545	89246304	11	1	1	1	1	1	1	1	1	0	1	1	1
chr1	89352279	89354567	12	1	1	1	1	1	1	1	1	1	1	1	1
chr1	89366170	89367642	7	1	0	0	1	1	1	1	1	0	0	1	0
chr1	89437993	89440883	12	1	1	1	1	1	1	1	1	1	1	1	1
chr1	89461129	89463628	1	0	0	0	0	0	0	0	0	0	1	0	0
chr1	89469968	89474042	5	1	0	0	1	1	1	0	0	0	1	0	0
chr1	89484631	89489909	12	1	1	1	1	1	1	1	1	1	1	1	1
chr1	89501547	89504239	1	0	0	0	0	0	0	0	0	0	0	0	1
chr1	89509341	89510733	5	0	0	1	0	0	1	1	1	0	1	0	0
chr1	89516766	89519946	2	0	0	0	0	1	0	0	0	0	1	0	0
chr1	89520372	89527716	12	1	1	1	1	1	1	1	1	1	1	1	1
chr1	89540045	89543306	10	1	1	1	1	1	1	1	0	0	1	1	1
chr1	89565299	89572262	11	1	1	1	1	1	1	1	1	0	1	1	1
chr1	89594909	89595965	1	0	0	0	0	0	0	0	0	0	0	0	1
chr1	89605732	89607214	1	0	0	0	1	0	0	0	0	0	0	0	0
chr1	89618319	89623804	6	1	1	0	1	1	1	0	0	0	1	0	0
chr1	89644752	89647980	4	1	0	0	1	0	0	0	1	0	0	0	1
chr1	89655954	89657559	12	1	1	1	1	1	1	1	1	1	1	1	1
chr1	89700447	89704042	10	1	1	0	1	1	1	1	1	1	1	1	0
chr1	89707817	89710445	3	0	0	0	0	0	1	0	0	0	1	0	1
chr1	89717155	89719734	3	0	0	0	1	1	0	0	0	0	1	0	0
chr1	89729827	89732114	8	1	1	1	0	1	0	1	1	1	0	1	0
chr1	89734111	89736012	7	1	1	0	0	1	0	1	1	1	1	0	0
chr1	89763737	89764663	2	0	0	0	0	0	0	1	1	0	0	0	0
chr1	89844821	89850869	12	1	1	1	1	1	1	1	1	1	1	1	1
chr1	89864674	89866760	3	0	0	0	0	1	1	0	0	0	0	0	1
chr1	89869409	89871007	1	1	0	0	0	0	0	0	0	0	0	0	0
chr1	89924258	89934881	12	1	1	1	1	1	1	1	1	1	1	1	1
chr1	89939086	89944530	8	1	0	0	1	1	1	1	0	0	1	1	1
chr1	89967218	89970229	12	1	1	1	1	1	1	1	1	1	1	1	1
chr1	89991646	89993204	3	1	0	0	0	1	0	1	0	0	0	0	0
chr1	90048785	90054024	11	1	1	1	1	1	1	1	1	1	1	1	0
chr1	90060641	90061515	3	1	0	0	0	0	0	0	1	0	0	1	0
chr1	90175029	90176803	1	1	0	0	0	0	0	0	0	0	0	0	0
chr1	90201418	90208011	12	1	1	1	1	1	1	1	1	1	1	1	1
chr1	90224015	90226738	12	1	1	1	1	1	1	1	1	1	1	1	1
chr1	90227236	90229260	5	1	0	0	1	1	1	0	0	0	0	1	0
chr1	90229800	90235862	11	1	1	1	1	1	1	1	1	0	1	1	1
chr1	90237698	90239765	5	1	0	0	1	1	1	0	0	0	0	0	1
chr1	90252482	90254813	8	1	1	0	0	1	1	1	1	0	1	1	0
chr1	90257950	90259778	8	1	1	1	0	1	0	1	1	1	0	1	0
chr1	90271528	90274518	12	1	1	1	1	1	1	1	1	1	1	1	1
chr1	90276710	90281386	12	1	1	1	1	1	1	1	1	1	1	1	1
chr1	90304015	90304958	1	0	0	0	0	0	1	0	0	0	0	0	0
chr1	90334740	90335967	6	1	0	0	1	1	1	0	0	0	1	0	1
chr1	90379500	90381610	5	1	0	0	1	1	0	0	0	0	1	0	1
chr1	90395591	90398258	3	0	0	0	1	1	1	0	0	0	0	0	0
chr1	90428488	90429312	1	0	0	0	0	1	0	0	0	0	0	0	0
chr1	90430129	90431008	1	0	0	0	1	0	0	0	0	0	0	0	0
chr1	90433211	90435867	3	1	0	0	0	1	1	0	0	0	0	0	0
chr1	90444587	90448893	11	1	1	1	1	1	1	0	1	1	1	1	1
chr1	90469411	90473936	9	1	1	0	1	1	1	1	1	0	1	1	0
chr1	90479851	90483222	12	1	1	1	1	1	1	1	1	1	1	1	1
chr1	90494955	90497113	2	0	0	0	1	0	0	0	0	0	1	0	0
chr1	90518064	90520951	6	1	1	1	0	1	1	1	0	0	0	0	0
chr1	90532413	90534666	11	1	1	1	1	1	1	1	1	1	1	1	0
chr1	90566574	90568033	2	1	1	0	0	0	0	0	0	0	0	0	0
chr1	90587210	90589714	10	1	1	1	1	1	1	1	1	0	1	1	0
chr1	90591525	90593685	6	1	0	0	1	1	0	0	1	0	1	0	1
chr1	90632310	90634804	10	1	1	1	0	1	0	1	1	1	1	1	1
chr1	90648743	90654246	11	1	1	1	1	1	1	1	1	0	1	1	1
chr1	90675659	90678695	5	1	1	1	0	0	0	0	1	0	0	0	1
chr1	90718208	90720018	12	1	1	1	1	1	1	1	1	1	1	1	1
chr1	90729150	90730020	4	0	1	0	0	0	0	1	1	1	0	0	0
chr1	90748883	90750943	7	1	0	0	1	1	1	0	0	1	1	1	0
chr1	90752894	90754839	4	1	0	0	0	1	0	1	0	0	0	1	0
chr1	90774315	90776761	11	1	1	1	1	1	1	1	1	0	1	1	1
chr1	90797059	90798189	1	0	0	0	0	0	0	0	1	0	0	0	0
chr1	90822843	90827221	3	1	1	0	0	0	0	1	0	0	0	0	0
chr1	90832945	90846590	12	1	1	1	1	1	1	1	1	1	1	1	1
chr1	90848221	90850127	2	0	0	0	0	0	0	1	1	0	0	0	0
chr1	90866070	90868072	10	1	1	1	0	1	0	1	1	1	1	1	1
chr1	90894957	90899453	12	1	1	1	1	1	1	1	1	1	1	1	1
chr1	90899504	90901879	11	1	1	1	1	1	0	1	1	1	1	1	1
chr1	90903784	90905023	4	1	1	1	0	1	0	0	0	0	0	0	0
chr1	90906424	90907307	2	0	0	0	1	0	0	0	1	0	0	0	0
chr1	90907919	90910811	12	1	1	1	1	1	1	1	1	1	1	1	1
chr1	90914329	90916181	8	0	1	0	1	1	1	1	1	0	1	1	0
chr1	90921660	90924355	5	1	1	0	0	0	0	1	1	1	0	0	0
chr1	90926831	90929600	12	1	1	1	1	1	1	1	1	1	1	1	1
chr1	90956200	90958095	3	1	0	0	1	0	0	1	0	0	0	0	0
chr1	90962102	90963462	1	1	0	0	0	0	0	0	0	0	0	0	0
chr1	90968436	90970599	4	1	0	0	0	0	0	1	0	0	1	1	0
chr1	90974353	90975852	7	1	1	0	0	1	1	1	1	0	0	0	1
chr1	91013765	91017917	5	1	0	0	1	0	0	1	1	0	1	0	0
chr1	91022047	91025437	10	1	1	1	0	1	0	1	1	1	1	1	1
chr1	91057214	91059081	4	0	1	1	0	1	0	0	0	0	1	0	0
chr1	91061758	91065757	3	0	0	0	0	1	0	0	1	1	0	0	0
chr1	91083809	91085655	1	1	0	0	0	0	0	0	0	0	0	0	0
chr1	91098633	91099480	2	1	0	0	0	0	0	1	0	0	0	0	0
chr1	91178197	91181619	12	1	1	1	1	1	1	1	1	1	1	1	1
chr1	91219175	91220518	8	1	1	1	0	1	1	0	1	1	1	0	0
chr1	91272161	91272921	2	0	0	0	0	0	0	0	1	1	0	0	0
chr1	91341699	91347785	9	1	1	0	1	1	1	1	0	0	1	1	1
chr1	91364339	91371735	12	1	1	1	1	1	1	1	1	1	1	1	1
chr1	91377757	91381471	5	1	0	0	0	1	0	1	1	0	0	0	1
chr1	91419760	91429786	10	1	1	1	1	1	1	1	0	0	1	1	1
chr1	91435351	91437562	5	1	1	0	1	1	0	0	1	0	0	0	0
chr1	91445647	91446881	1	0	1	0	0	0	0	0	0	0	0	0	0
chr1	91455924	91457066	1	0	0	0	0	0	0	0	0	1	0	0	0
chr1	91483208	91484146	1	0	0	0	1	0	0	0	0	0	0	0	0
chr1	91514461	91516636	2	0	0	0	1	0	1	0	0	0	0	0	0
chr1	91523132	91524202	2	1	0	0	0	0	1	0	0	0	0	0	0
chr1	91531567	91534554	8	1	0	0	1	1	1	0	1	0	1	1	1
chr1	91564557	91565197	1	0	0	0	1	0	0	0	0	0	0	0	0
chr1	91604523	91607848	6	1	0	1	1	0	1	1	0	0	1	0	0
chr1	91608710	91615103	12	1	1	1	1	1	1	1	1	1	1	1	1
chr1	91615348	91616971	1	0	0	0	0	0	1	0	0	0	0	0	0
chr1	91617574	91620107	12	1	1	1	1	1	1	1	1	1	1	1	1
chr1	91627649	91634134	4	1	0	0	1	0	1	0	0	0	1	0	0
chr1	91707328	91710844	12	1	1	1	1	1	1	1	1	1	1	1	1
chr1	91718584	91720326	1	0	0	0	0	0	1	0	0	0	0	0	0
chr1	91730437	91733738	11	1	1	0	1	1	1	1	1	1	1	1	1
chr1	91754701	91758021	6	1	0	0	1	1	1	0	0	0	1	1	0
chr1	91759840	91760861	4	0	0	0	1	1	1	0	0	0	1	0	0
chr1	91769742	91772197	9	1	0	1	1	1	1	0	1	0	1	1	1
chr1	91799419	91803403	12	1	1	1	1	1	1	1	1	1	1	1	1
chr1	91815367	91820205	12	1	1	1	1	1	1	1	1	1	1	1	1
chr1	91822082	91824411	11	1	1	1	1	1	1	1	1	1	1	1	0
chr1	91827967	91829304	1	0	0	0	0	0	0	0	0	1	0	0	0
chr1	91837631	91841565	12	1	1	1	1	1	1	1	1	1	1	1	1
chr1	91857595	91859285	3	1	1	0	0	1	0	0	0	0	0	0	0
chr1	91869777	91876116	12	1	1	1	1	1	1	1	1	1	1	1	1
chr1	91961175	91970621	10	1	1	0	1	1	1	1	1	0	1	1	1
chr1	92003594	92005922	7	1	0	0	1	1	1	0	1	0	0	1	1
chr1	92060599	92062700	5	0	0	0	1	1	1	0	0	0	1	0	1
chr1	92079002	92082276	11	1	1	1	1	1	1	1	1	1	1	1	0
chr1	92143416	92145942	3	1	0	0	0	1	1	0	0	0	0	0	0
chr1	92214595	92217138	9	1	1	0	1	1	1	0	1	0	1	1	1
chr1	92329325	92330635	3	0	0	0	1	0	1	0	0	0	1	0	0
chr1	92348306	92349220	2	1	1	0	0	0	0	0	0	0	0	0	0
chr1	92368823	92374382	12	1	1	1	1	1	1	1	1	1	1	1	1
chr1	92378371	92380812	12	1	1	1	1	1	1	1	1	1	1	1	1
chr1	92403547	92407168	3	1	0	0	0	0	0	0	1	0	1	0	0
chr1	92520399	92522914	2	0	0	0	0	0	0	0	0	0	1	0	1
chr1	92610772	92611319	1	0	0	0	0	1	0	0	0	0	0	0	0
chr1	92686237	92687719	1	1	0	0	0	0	0	0	0	0	0	0	0
chr1	92711541	92714112	10	1	1	1	0	1	0	1	1	1	1	1	1
chr1	92744604	92746671	9	1	1	0	1	1	0	1	1	0	1	1	1
chr1	92750285	92753049	9	1	1	1	0	1	1	1	1	0	0	1	1
chr1	92753186	92756568	4	1	0	0	1	1	1	0	0	0	0	0	0
chr1	92773858	92775702	6	1	1	0	0	1	1	0	1	1	0	0	0
chr1	92784529	92792286	12	1	1	1	1	1	1	1	1	1	1	1	1
chr1	92798656	92800694	7	1	1	1	0	1	0	0	1	1	0	1	0
chr1	92813764	92816379	5	0	0	0	1	1	1	0	0	0	1	1	0
chr1	92836684	92839471	2	1	1	0	0	0	0	0	0	0	0	0	0
chr1	92895040	92896076	2	0	0	0	0	1	0	0	1	0	0	0	0
chr1	92901912	92904825	12	1	1	1	1	1	1	1	1	1	1	1	1
chr1	93013654	93015938	3	1	1	0	0	0	0	0	1	0	0	0	0
chr1	93062017	93066334	2	1	0	0	1	0	0	0	0	0	0	0	0
chr1	93205126	93218849	12	1	1	1	1	1	1	1	1	1	1	1	1
chr1	93219437	93222830	11	1	1	1	1	1	1	1	1	0	1	1	1
chr1	93223134	93230625	12	1	1	1	1	1	1	1	1	1	1	1	1
chr1	93266619	93268129	1	1	0	0	0	0	0	0	0	0	0	0	0
chr1	93271180	93273509	5	1	1	0	1	1	1	0	0	0	0	0	0
chr1	93289305	93290754	3	0	0	0	0	0	0	0	0	1	0	1	1
chr1	93398970	93407597	12	1	1	1	1	1	1	1	1	1	1	1	1
chr1	93506372	93507800	4	1	1	0	0	0	1	0	0	0	1	0	0
chr1	93562952	93564316	5	0	1	0	0	1	0	0	1	1	0	1	0
chr1	93566997	93567830	1	0	0	0	0	0	0	0	1	0	0	0	0
chr1	93617405	93619652	11	1	1	1	1	1	1	1	1	1	1	1	0
chr1	93622487	93623503	1	1	0	0	0	0	0	0	0	0	0	0	0
chr1	93666396	93669853	12	1	1	1	1	1	1	1	1	1	1	1	1
chr1	93679011	93681088	9	1	1	1	0	1	0	1	1	1	0	1	1
chr1	93740536	93741013	1	0	0	0	0	0	0	0	1	0	0	0	0
chr1	93834165	93836386	1	0	1	0	0	0	0	0	0	0	0	0	0
chr1	93845933	93846258	1	0	0	0	0	0	0	0	1	0	0	0	0
chr1	93911152	93912175	2	0	0	0	0	1	0	0	1	0	0	0	0
chr1	93980946	93981180	1	0	0	0	0	0	0	0	1	0	0	0	0
chr1	94028442	94029214	1	0	0	0	0	0	0	0	1	0	0	0	0
chr1	94051097	94056890	12	1	1	1	1	1	1	1	1	1	1	1	1
chr1	94469908	94470169	10	1	1	1	1	1	0	1	1	1	1	1	0
chr1	94536490	94538293	6	1	1	0	0	1	0	0	1	1	0	1	0
chr1	94679299	94680090	1	0	0	0	0	0	0	0	1	0	0	0	0
chr1	94728541	94729727	4	0	0	0	1	0	1	0	0	0	0	1	1
chr1	95367443	95368634	1	0	0	0	0	0	0	0	1	0	0	0	0
chr1	95451924	95452244	7	0	1	1	1	1	0	0	0	1	1	0	1
chr1	95498565	95499176	3	0	0	0	1	0	0	1	0	0	1	0	0
chr1	95710409	95711611	2	0	0	0	0	0	0	0	1	0	0	1	0
chr1	95762186	95763091	2	0	0	0	0	0	0	0	1	1	0	0	0
chr1	96300195	96302505	9	1	1	1	1	1	0	0	1	0	1	1	1
chr1	96362401	96363853	5	1	1	1	0	1	0	0	1	0	0	0	0
chr1	96768120	96770537	5	1	1	0	0	1	0	0	1	0	0	1	0
chr1	96803925	96805957	12	1	1	1	1	1	1	1	1	1	1	1	1
chr1	97037441	97039575	6	1	1	1	0	1	0	0	1	1	0	0	0
chr1	97554806	97555634	1	0	0	0	0	0	0	0	1	0	0	0	0
chr1	97623785	97626075	1	0	0	0	0	1	0	0	0	0	0	0	0
chr1	97631935	97634770	11	1	1	1	1	1	1	0	1	1	1	1	1
chr1	97647636	97653288	12	1	1	1	1	1	1	1	1	1	1	1	1
chr1	97767162	97768431	1	0	0	0	0	0	0	0	0	0	0	1	0
chr1	97873352	97875016	3	0	0	0	0	0	0	0	1	1	0	1	0
chr1	97908663	97912720	12	1	1	1	1	1	1	1	1	1	1	1	1
chr1	97915055	97920002	12	1	1	1	1	1	1	1	1	1	1	1	1
chr1	97920811	97925360	10	1	1	1	0	1	0	1	1	1	1	1	1
chr1	97941517	97946314	12	1	1	1	1	1	1	1	1	1	1	1	1
chr1	97948744	97950802	2	0	0	0	0	0	0	0	0	0	1	1	0
chr1	97959026	97961936	7	0	0	0	1	1	0	1	1	1	1	1	0
chr1	97985132	97986535	3	0	0	0	0	0	0	0	1	1	0	1	0
chr1	97996879	97999984	12	1	1	1	1	1	1	1	1	1	1	1	1
chr1	98028569	98029480	1	0	0	0	0	0	0	0	0	0	0	1	0
chr1	98055060	98058703	10	1	1	1	0	1	0	1	1	1	1	1	1
chr1	98059297	98059911	1	0	0	0	0	0	0	0	1	0	0	0	0
chr1	98067971	98070143	1	0	0	0	0	0	0	0	1	0	0	0	0
chr1	98070619	98072555	1	0	0	0	0	0	0	0	1	0	0	0	0
chr1	98078255	98082232	12	1	1	1	1	1	1	1	1	1	1	1	1
chr1	98173938	98175030	1	0	0	0	0	0	1	0	0	0	0	0	0
chr1	98366012	98367171	2	0	0	0	0	0	0	0	0	0	0	1	1
chr1	98542409	98543240	1	0	0	0	0	0	1	0	0	0	0	0	0
chr1	99570992	99571955	1	0	0	0	0	0	0	0	1	0	0	0	0
chr1	99661274	99663052	9	1	1	1	0	1	1	0	1	1	0	1	1
chr1	99790213	99791072	2	0	0	0	0	0	0	1	0	0	1	0	0
chr1	100041231	100042628	1	0	0	1	0	0	0	0	0	0	0	0	0
chr1	100180087	100180436	12	1	1	1	1	1	1	1	1	1	1	1	1
chr1	100754371	100755340	1	0	0	0	0	0	0	0	0	0	0	1	0
chr1	101103292	101108505	1	0	0	0	0	0	0	0	0	1	0	0	0
chr1	101934220	101935241	1	0	0	0	0	0	1	0	0	0	0	0	0
chr1	102507490	102509207	2	0	0	0	1	0	0	0	0	1	0	0	0
chr1	102627889	102628333	2	0	0	0	1	0	0	0	1	0	0	0	0
chr1	103419247	103419844	1	0	0	0	0	0	0	0	0	0	0	1	0
chr1	104968421	104969494	1	0	0	0	0	0	0	0	0	0	0	0	1
chr1	104985385	104987167	4	0	0	1	0	1	0	0	1	1	0	0	0
chr1	105019599	105021384	6	0	0	0	1	0	1	0	0	1	1	1	1
chr1	105087861	105089811	10	1	1	1	1	1	1	0	1	0	1	1	1
chr1	105100807	105102437	1	1	0	0	0	0	0	0	0	0	0	0	0
chr1	105117588	105119190	2	1	0	0	0	0	0	0	1	0	0	0	0
chr1	105175027	105180893	12	1	1	1	1	1	1	1	1	1	1	1	1
chr1	105187714	105189338	1	0	0	0	0	0	0	0	1	0	0	0	0
chr1	105215224	105216996	3	0	0	0	1	1	0	0	0	0	1	0	0
chr1	105222979	105224558	2	1	0	0	0	0	0	0	1	0	0	0	0
chr1	105303278	105305101	6	0	1	1	0	0	0	0	1	1	0	1	1
chr1	105373806	105374451	1	0	0	0	0	0	0	0	1	0	0	0	0
chr1	105423207	105426979	8	1	1	0	1	1	1	0	1	0	1	1	0
chr1	105430768	105432462	5	0	1	0	0	1	0	0	1	1	0	1	0
chr1	105434002	105438752	8	1	1	0	0	1	1	0	1	1	1	1	0
chr1	105630568	105631379	1	0	0	0	0	0	0	0	1	0	0	0	0
chr1	105659806	105660988	2	0	1	0	0	0	0	0	1	0	0	0	0
chr1	105725164	105726105	1	0	0	0	0	0	0	0	0	1	0	0	0
chr1	105727809	105728570	2	0	1	0	0	0	0	0	1	0	0	0	0
chr1	105731208	105732527	4	0	0	0	0	1	0	0	1	1	0	1	0
chr1	105789548	105790893	2	0	0	0	0	1	0	0	1	0	0	0	0
chr1	105812417	105816428	12	1	1	1	1	1	1	1	1	1	1	1	1
chr1	105826879	105829007	5	0	1	0	0	1	0	0	1	0	0	1	1
chr1	105842737	105845202	10	1	1	1	0	1	1	1	1	0	1	1	1
chr1	105863131	105868875	12	1	1	1	1	1	1	1	1	1	1	1	1
chr1	105876587	105878869	2	0	0	0	0	0	0	0	1	0	0	1	0
chr1	105879237	105882242	12	1	1	1	1	1	1	1	1	1	1	1	1
chr1	105889978	105892013	8	1	1	0	0	1	0	1	1	1	0	1	1
chr1	105906208	105907021	1	0	0	0	1	0	0	0	0	0	0	0	0
chr1	105996054	105998927	2	0	1	0	0	0	0	0	1	0	0	0	0
chr1	106032059	106040166	12	1	1	1	1	1	1	1	1	1	1	1	1
chr1	106042059	106044325	10	1	1	1	0	1	1	0	1	1	1	1	1
chr1	106148180	106150290	8	1	1	0	0	1	0	0	1	1	1	1	1
chr1	106167565	106169061	1	0	0	0	0	0	0	0	1	0	0	0	0
chr1	106185444	106186747	1	0	0	0	0	1	0	0	0	0	0	0	0
chr1	106187163	106188636	3	1	1	0	0	0	0	0	1	0	0	0	0
chr1	106209372	106211927	10	1	1	1	0	1	0	1	1	1	1	1	1
chr1	106229141	106231483	9	1	1	1	0	1	1	0	1	0	1	1	1
chr1	106240920	106243945	12	1	1	1	1	1	1	1	1	1	1	1	1
chr1	106299701	106300842	5	0	0	1	0	0	1	0	0	1	0	1	1
chr1	106314315	106315047	1	0	0	0	0	0	0	0	1	0	0	0	0
chr1	106316611	106318347	1	0	0	0	0	0	0	0	1	0	0	0	0
chr1	106398954	106402011	7	1	1	1	0	1	1	0	1	0	1	0	0
chr1	106406649	106409826	7	0	1	0	0	1	1	0	1	1	1	1	0
chr1	106424384	106426584	4	1	1	0	0	1	0	0	1	0	0	0	0
chr1	106460301	106461847	6	1	1	1	0	1	0	0	1	1	0	0	0
chr1	106503090	106503619	1	0	0	0	0	0	0	0	1	0	0	0	0
chr1	106510945	106512554	10	1	1	0	1	1	1	1	1	1	0	1	1
chr1	106548528	106557275	11	1	1	1	0	1	1	1	1	1	1	1	1
chr1	106561176	106563319	1	0	0	0	0	0	0	0	1	0	0	0	0
chr1	106567776	106571154	3	0	1	0	0	0	0	0	1	1	0	0	0
chr1	106581194	106584696	2	1	0	0	0	0	0	0	1	0	0	0	0
chr1	106585464	106588617	11	1	1	1	1	1	1	0	1	1	1	1	1
chr1	106596387	106599632	12	1	1	1	1	1	1	1	1	1	1	1	1
chr1	106612034	106614484	4	0	1	0	0	0	0	0	1	1	0	1	0
chr1	106626375	106631386	12	1	1	1	1	1	1	1	1	1	1	1	1
chr1	106650253	106652756	1	0	0	0	0	0	0	0	1	0	0	0	0
chr1	106680335	106681585	2	0	0	0	0	0	0	0	1	1	0	0	0
chr1	106698289	106702241	11	1	1	1	0	1	1	1	1	1	1	1	1
chr1	106716456	106719512	3	0	1	0	0	0	0	1	0	1	0	0	0
chr1	106737336	106739005	1	0	0	0	0	0	0	0	0	1	0	0	0
chr1	106818129	106819139	1	0	0	0	0	0	0	0	1	0	0	0	0
chr1	106821377	106823294	3	1	1	0	0	0	0	0	1	0	0	0	0
chr1	106854859	106855461	1	0	0	0	0	0	0	0	0	0	0	0	1
chr1	106860894	106861391	1	0	0	0	0	0	0	0	1	0	0	0	0
chr1	106865021	106867319	10	1	1	1	0	1	1	1	1	1	1	1	0
chr1	106999810	107001330	10	1	1	1	1	1	1	1	1	1	1	0	0
chr1	107505252	107507036	5	0	1	0	0	1	0	0	1	1	0	1	0
chr1	107588859	107591224	12	1	1	1	1	1	1	1	1	1	1	1	1
chr1	107598299	107598737	1	0	0	0	0	0	0	0	1	0	0	0	0
chr1	107644577	107646430	3	0	1	0	0	0	0	0	1	0	0	1	0
chr1	107701957	107703454	6	1	0	0	0	1	0	0	1	0	1	1	1
chr1	107822890	107824317	4	0	0	0	0	0	1	0	1	0	0	1	1
chr1	107881450	107882006	1	0	0	0	0	0	0	0	0	0	0	1	0
chr1	107908071	107908999	1	0	0	0	1	0	0	0	0	0	0	0	0
chr1	107916682	107918052	6	1	1	1	0	1	0	0	1	0	0	1	0
chr1	110171186	110172308	3	1	0	0	0	0	1	0	0	0	0	0	1
chr1	110473495	110473703	1	0	0	0	1	0	0	0	0	0	0	0	0
chr1	110483074	110483839	1	0	1	0	0	0	0	0	0	0	0	0	0
chr1	110976998	110977890	2	0	0	0	0	0	0	0	1	1	0	0	0
chr1	111980543	111980818	1	0	0	0	0	1	0	0	0	0	0	0	0
chr1	112388349	112389426	1	0	0	0	0	1	0	0	0	0	0	0	0
chr1	112455620	112456719	2	0	0	0	0	1	0	0	1	0	0	0	0
chr1	112943969	112945064	1	0	1	0	0	0	0	0	0	0	0	0	0
chr1	114182445	114183954	8	1	0	0	1	1	1	0	1	1	0	1	1
chr1	114556992	114558733	7	0	0	0	1	0	1	0	1	1	1	1	1
chr1	114808269	114809332	5	0	0	0	0	0	1	0	1	0	1	1	1
chr1	115447296	115448261	2	0	0	0	0	0	0	0	0	0	0	1	1
chr1	115868044	115869158	1	0	0	0	0	0	0	0	1	0	0	0	0
chr1	115945526	115946556	2	0	1	0	0	0	0	0	1	0	0	0	0
chr1	115956493	115957352	1	0	0	0	0	0	0	0	1	0	0	0	0
chr1	115961787	115965604	12	1	1	1	1	1	1	1	1	1	1	1	1
chr1	116362633	116363469	4	0	0	0	1	0	0	0	0	1	0	1	1
chr1	116861336	116862534	5	0	0	0	1	0	1	0	0	1	0	1	1
chr1	117253599	117255013	12	1	1	1	1	1	1	1	1	1	1	1	1
chr1	118096851	118097700	1	0	0	0	0	0	0	0	0	0	0	1	0
chr1	118127915	118128806	1	0	0	0	0	0	0	0	0	0	0	1	0
chr1	118452164	118455679	5	0	1	0	0	1	0	0	1	0	0	1	1
chr1	118476562	118477153	1	0	0	0	0	0	0	0	1	0	0	0	0
chr1	118480789	118483134	8	1	0	0	0	1	1	1	1	1	1	1	0
chr1	118485411	118486360	2	0	0	0	0	1	0	0	1	0	0	0	0
chr1	118494080	118495242	2	0	0	0	0	1	0	0	0	0	0	1	0
chr1	118716094	118716857	1	0	0	0	0	0	0	0	1	0	0	0	0
chr1	118717684	118719044	1	0	0	0	0	0	0	0	1	0	0	0	0
chr1	118767211	118769803	2	1	0	0	0	1	0	0	0	0	0	0	0
chr1	118787302	118790883	2	0	0	0	1	0	1	0	0	0	0	0	0
chr1	118798331	118801014	12	1	1	1	1	1	1	1	1	1	1	1	1
chr1	118802290	118803534	1	0	0	0	0	0	0	0	1	0	0	0	0
chr1	118835873	118838193	1	0	0	0	0	0	0	0	0	0	0	1	0
chr1	118849337	118850800	1	0	0	0	0	0	0	0	1	0	0	0	0
chr1	118872886	118874992	8	1	1	1	1	1	0	0	1	0	0	1	1
chr1	118877870	118880720	11	1	1	1	1	1	1	1	1	1	1	1	0
chr1	118889137	118897094	12	1	1	1	1	1	1	1	1	1	1	1	1
chr1	118899350	118903295	10	1	1	0	1	1	1	1	1	0	1	1	1
chr1	118904932	118906063	2	0	1	0	0	0	0	1	0	0	0	0	0
chr1	118906908	118910172	3	0	0	0	0	0	0	1	1	1	0	0	0
chr1	118915438	118918817	12	1	1	1	1	1	1	1	1	1	1	1	1
chr1	118921734	118925265	4	0	0	0	1	1	1	0	0	0	0	1	0
chr1	118926704	118929567	8	0	1	1	0	1	0	1	1	1	0	1	1
chr1	118968752	118971041	3	0	0	0	0	0	0	1	1	0	0	1	0
chr1	118974995	118979461	11	1	1	1	1	1	1	1	1	1	1	0	1
chr1	118993739	118994429	1	0	0	0	0	0	0	0	1	0	0	0	0
chr1	118996814	119003058	11	1	1	1	1	1	1	1	1	0	1	1	1
chr1	119003380	119007794	7	1	1	0	0	1	0	0	1	0	1	1	1
chr1	119013207	119018876	4	1	1	0	0	0	0	0	1	0	1	0	0
chr1	119021576	119024417	4	1	1	0	0	0	0	0	1	0	1	0	0
chr1	119024926	119027354	11	1	1	1	1	1	0	1	1	1	1	1	1
chr1	119045860	119049198	5	0	0	1	1	0	0	0	1	0	1	1	0
chr1	119063813	119065557	2	1	0	0	0	0	1	0	0	0	0	0	0
chr1	119077283	119078523	1	1	0	0	0	0	0	0	0	0	0	0	0
chr1	119086352	119088744	9	1	1	0	1	1	1	1	1	1	0	1	0
chr1	119092978	119094727	7	1	1	1	1	0	0	1	1	0	0	1	0
chr1	119107882	119109156	1	0	0	0	0	0	0	0	1	0	0	0	0
chr1	119143317	119144816	1	1	0	0	0	0	0	0	0	0	0	0	0
chr1	119152213	119153268	3	0	0	0	1	1	0	0	0	0	0	0	1
chr1	119185349	119186466	2	1	0	1	0	0	0	0	0	0	0	0	0
chr1	119216686	119218289	2	0	1	0	0	0	0	0	1	0	0	0	0
chr1	119258229	119260806	3	0	0	0	1	1	0	0	0	0	0	1	0
chr1	119288763	119290896	2	0	1	0	0	0	0	0	1	0	0	0	0
chr1	119291269	119294629	12	1	1	1	1	1	1	1	1	1	1	1	1
chr1	119304069	119306040	1	0	1	0	0	0	0	0	0	0	0	0	0
chr1	119307994	119309847	5	1	0	0	1	1	1	0	0	0	0	1	0
[truncated: 48,670 more rows]

## Sheet: All regions annotated hg38
chr_hg38	start_hg38	end_hg38	Number of peak sets containing peak	Metatarsal 1	Metatarsal 3	Metatarsal 5	Foot phalanges 1	Foot phalanges 3	Foot phalanges 5	Metacarpal 1	Metacarpal 3	Metacarpal 5	Hand phalanges 1	Hand phalanges 3	Hand phalanges 5
chr8	67118508	67132293	10	1	1	0	1	1	0	1	1	1	1	1	1
chr14	105538349	105538562	7	1	0	0	1	1	1	0	0	0	1	1	1
chr14	105538369	105538476	7	1	0	0	1	1	1	0	0	0	1	1	1
chr7	158609280	158609883	7	1	0	0	1	1	1	0	0	0	1	1	1
chr8	67233552	67234251	1	0	0	0	0	0	0	0	1	0	0	0	0
chr8	67350611	67350729	1	0	0	0	0	0	0	0	0	0	0	1	0
chr8	67375367	67378005	10	1	1	1	0	1	0	1	1	1	1	1	1
chr8	67453503	67455288	2	1	1	0	0	0	0	0	0	0	0	0	0
chr8	67512637	67516304	3	1	0	1	0	1	0	0	0	0	0	0	0
chr18	61550707	61552499	4	0	0	1	0	1	0	0	1	1	0	0	0
chr18	61628302	61632663	10	1	1	1	1	1	1	0	1	0	1	1	1
chr18	61664290	61665763	2	1	0	0	0	0	0	0	1	0	0	0	0
chr18	61731461	61737138	12	1	1	1	1	1	1	1	1	1	1	1	1
chr18	61742002	61743673	1	0	0	0	0	0	0	0	1	0	0	0	0
chr18	61764139	61765680	2	1	0	0	0	0	0	0	1	0	0	0	0
chr18	61837336	61839287	6	0	1	1	0	0	0	0	1	1	0	1	1
chr18	61908350	61908465	1	0	0	0	0	0	0	0	1	0	0	0	0
chr1	19608096	19608365	1	0	0	0	0	0	0	0	1	0	0	0	0
chr18	61946322	61949505	8	1	1	0	1	1	1	0	1	0	1	1	0
chr18	61952272	61953331	5	0	1	0	0	1	0	0	1	1	0	1	0
chr18	61959300	61963826	8	1	1	0	0	1	1	0	1	1	1	1	0
chr18	62131426	62132107	1	0	0	0	0	0	0	0	1	0	0	0	0
chr8	67579448	67580495	1	0	0	0	0	0	1	0	0	0	0	0	0
chr18	62183571	62184549	2	0	1	0	0	0	0	0	1	0	0	0	0
chr18	62263855	62264426	1	0	0	0	0	0	0	0	0	1	0	0	0
chr18	62266478	62267332	2	0	1	0	0	0	0	0	1	0	0	0	0
chr18	62268876	62269338	4	0	0	0	0	1	0	0	1	1	0	1	0
chr18	62334165	62334640	2	0	0	0	0	1	0	0	1	0	0	0	0
chr18	62353007	62357073	12	1	1	1	1	1	1	1	1	1	1	1	1
chr18	62368580	62370580	5	0	1	0	0	1	0	0	1	0	0	1	1
chr18	62381342	62385060	10	1	1	1	0	1	1	1	1	0	1	1	1
chr18	62396040	62400103	12	1	1	1	1	1	1	1	1	1	1	1	1
chr18	62416905	62417919	2	0	0	0	0	0	0	0	1	0	0	1	0
chr18	62424576	62426696	8	1	1	0	0	1	0	1	1	1	0	1	1
chr18	62450858	62451369	1	0	0	0	1	0	0	0	0	0	0	0	0
chr8	67618511	67622592	7	1	1	0	0	1	1	0	1	0	0	1	1
chr18	62530574	62535318	2	0	1	0	0	0	0	0	1	0	0	0	0
chr18	62576478	62584923	12	1	1	1	1	1	1	1	1	1	1	1	1
chr18	62590691	62591821	10	1	1	1	0	1	1	0	1	1	1	1	1
chr18	62681119	62682451	8	1	1	0	0	1	0	0	1	1	1	1	1
chr18	62708822	62711161	1	0	0	0	0	0	0	0	1	0	0	0	0
chr18	62730080	62734159	1	0	0	0	0	1	0	0	0	0	0	0	0
chr18	62734453	62736357	3	1	1	0	0	0	0	0	1	0	0	0	0
chr18	62762706	62765311	10	1	1	1	0	1	0	1	1	1	1	1	1
chr18	62783699	62784579	9	1	1	1	0	1	1	0	1	0	1	1	1
chr18	62790673	62793790	12	1	1	1	1	1	1	1	1	1	1	1	1
chr18	62852671	62853035	1	0	0	0	0	0	0	0	1	0	0	0	0
chr18	62854671	62858268	1	0	0	0	0	0	0	0	1	0	0	0	0
chr18	62986699	63000786	7	1	1	1	0	1	1	0	1	0	1	0	0
chr18	63006053	63006589	7	0	1	0	0	1	1	0	1	1	1	1	0
chr18	63016319	63017957	4	1	1	0	0	1	0	0	1	0	0	0	0
chr18	63050757	63052736	6	1	1	1	0	1	0	0	1	1	0	0	0
chr18	63086431	63087282	1	0	0	0	0	0	0	0	1	0	0	0	0
chr18	63095220	63096102	10	1	1	0	1	1	1	1	1	1	0	1	1
chr18	63137397	63146611	11	1	1	1	0	1	1	1	1	1	1	1	1
chr18	63150905	63154759	1	0	0	0	0	0	0	0	1	0	0	0	0
chr18	63159212	63162620	3	0	1	0	0	0	0	0	1	1	0	0	0
chr18	63176144	63180165	2	1	0	0	0	0	0	0	1	0	0	0	0
chr18	63181051	63184042	11	1	1	1	1	1	1	0	1	1	1	1	1
chr18	63194835	63197398	12	1	1	1	1	1	1	1	1	1	1	1	1
chr18	63211912	63215320	4	0	1	0	0	0	0	0	1	1	0	1	0
chr18	63236474	63239450	12	1	1	1	1	1	1	1	1	1	1	1	1
chr18	63259008	63261661	1	0	0	0	0	0	0	0	1	0	0	0	0
chr18	63283627	63284555	2	0	0	0	0	0	0	0	1	1	0	0	0
chr18	63302783	63305774	11	1	1	1	0	1	1	1	1	1	1	1	1
chr18	63322151	63326063	3	0	1	0	0	0	0	1	0	1	0	0	0
chr8	67701395	67712176	4	0	0	0	0	1	0	0	1	0	0	1	1
chr18	63438988	63439466	1	0	0	0	0	0	0	0	1	0	0	0	0
chr18	63441796	63446260	3	1	1	0	0	0	0	0	1	0	0	0	0
chr18	63476694	63477204	1	0	0	0	0	0	0	0	1	0	0	0	0
chr18	63479708	63480808	10	1	1	1	0	1	1	1	1	1	1	1	0
chr8	67719878	67722259	3	0	0	0	1	1	1	0	0	0	0	0	0
chr18	63596296	63597905	10	1	1	1	1	1	1	1	1	1	1	0	0
chr8	67743946	67748346	12	1	1	1	1	1	1	1	1	1	1	1	1
chr18	63881884	63883447	5	0	1	0	0	1	0	0	1	1	0	1	0
chr18	63969960	63971432	12	1	1	1	1	1	1	1	1	1	1	1	1
chr11	69872735	69872823	3	0	0	0	0	0	1	0	0	0	0	1	1
chr11	76692844	76693083	3	0	0	0	0	0	1	0	0	0	0	1	1
chr7	44226768	44226903	3	0	0	0	0	0	1	0	0	0	0	1	1
chr18	63979132	63979631	1	0	0	0	0	0	0	0	1	0	0	0	0
chr18	64026561	64028244	3	0	1	0	0	0	0	0	1	0	0	1	0
chr18	64081645	64083773	6	1	0	0	0	1	0	0	1	0	1	1	1
chr8	67791413	67792638	5	1	0	0	0	1	0	0	0	0	1	1	1
chr18	64219245	64220120	1	0	0	0	1	0	0	0	0	0	0	0	0
chr18	64236793	64238642	6	1	1	1	0	1	0	0	1	0	0	1	0
chr8	67818406	67819977	1	0	0	0	0	0	1	0	0	0	0	0	0
chr8	67820893	67821088	1	0	0	0	0	0	0	0	1	0	0	0	0
chrY	20906488	20907493	1	0	0	0	0	0	0	0	1	0	0	0	0
chr8	67854630	67855168	6	1	1	1	0	0	0	1	1	1	0	0	0
chr8	67979740	67982142	2	1	1	0	0	0	0	0	0	0	0	0	0
chr8	67984494	67988856	3	1	0	0	0	0	0	1	1	0	0	0	0
chr8	68037223	68037744	3	0	0	0	0	0	0	0	1	0	0	1	1
chr18	66603716	66604505	2	0	0	0	0	0	0	0	1	1	0	0	0
chr18	67599408	67599699	1	0	0	0	0	1	0	0	0	0	0	0	0
chr8	68155595	68156011	6	1	0	0	0	1	1	0	1	0	0	1	1
chr2	122688808	122689136	7	0	0	0	1	0	1	0	1	1	1	1	1
chr8	68490403	68490905	3	1	1	0	0	0	0	0	1	0	0	0	0
chr8	68494967	68495581	1	0	0	0	0	0	0	1	0	0	0	0	0
chr2	124267312	124268208	2	0	1	0	0	0	0	0	1	0	0	0	0
chr2	124275702	124276109	1	0	0	0	0	0	0	0	1	0	0	0	0
chr2	124280698	124286980	12	1	1	1	1	1	1	1	1	1	1	1	1
chr8	68719167	68719286	1	0	0	0	0	0	1	0	0	0	0	0	0
chr2	121554636	121556859	5	0	1	0	0	1	0	0	1	0	0	1	1
chr10	113820459	113820593	5	0	1	0	0	1	0	0	1	0	0	1	1
chr2	121489340	121491639	8	1	0	0	0	1	1	1	1	1	1	1	0
chr2	121486517	121486858	2	0	0	0	0	1	0	0	1	0	0	0	0
chr2	121159675	121160403	1	0	0	0	0	0	0	0	1	0	0	0	0
chr2	121079875	121081323	2	1	0	0	0	1	0	0	0	0	0	0	0
chr2	121063692	121066772	2	0	0	0	1	0	1	0	0	0	0	0	0
chr2	121038793	121039724	12	1	1	1	1	1	1	1	1	1	1	1	1
chr2	121038084	121038329	1	0	0	0	0	0	0	0	1	0	0	0	0
chr2	120988191	120990586	1	0	0	0	0	0	0	0	0	0	0	1	0
chr2	120974089	120974270	1	0	0	0	0	0	0	0	1	0	0	0	0
chr2	120942421	120944761	8	1	1	1	1	1	0	0	1	0	0	1	1
chr2	120936188	120938979	11	1	1	1	1	1	1	1	1	1	1	1	0
chr2	120914065	120928540	12	1	1	1	1	1	1	1	1	1	1	1	1
chr2	120926460	120926801	12	1	1	1	1	1	1	1	1	1	1	1	1
chr2	120904861	120911080	10	1	1	0	1	1	1	1	1	0	1	1	1
chr2	120901849	120902888	2	0	1	0	0	0	0	1	0	0	0	0	0
chr2	120894443	120901596	3	0	0	0	0	0	0	1	1	1	0	0	0
chr2	120883686	120885810	12	1	1	1	1	1	1	1	1	1	1	1	1
chr2	120878049	120880248	4	0	0	0	1	1	1	0	0	0	0	1	0
chr2	120873676	120874887	8	0	1	1	0	1	0	1	1	1	0	1	1
chr2	120831246	120833139	3	0	0	0	0	0	0	1	1	0	0	1	0
chr2	120823129	120826152	11	1	1	1	1	1	1	1	1	1	1	0	1
chr2	120796805	120799247	11	1	1	1	1	1	1	1	1	0	1	1	1
chr2	134151324	134151580	11	1	1	1	1	1	1	1	1	0	1	1	1
chr2	120788238	120793926	7	1	1	0	0	1	0	0	1	0	1	1	1
chr2	120775257	120780309	4	1	1	0	0	0	0	0	1	0	1	0	0
chr2	120767238	120772683	4	1	1	0	0	0	0	0	1	0	1	0	0
chr2	120765610	120766730	11	1	1	1	1	1	0	1	1	1	1	1	1
chr2	120740549	120743123	5	0	0	1	1	0	0	0	1	0	1	1	0
chr2	120716686	120717792	2	1	0	0	0	0	1	0	0	0	0	0	0
chr2	120702808	120703194	1	1	0	0	0	0	0	0	0	0	0	0	0
chr2	120675232	120675865	7	1	1	1	1	0	0	1	1	0	0	1	0
chr2	120659439	120660893	1	0	0	0	0	0	0	0	1	0	0	0	0
chr2	120579184	120579863	2	1	0	1	0	0	0	0	0	0	0	0	0
chr2	120545659	120547036	2	0	1	0	0	0	0	0	1	0	0	0	0
chr2	120508376	120509334	3	0	0	0	1	1	0	0	0	0	0	1	0
chr2	120481003	120482676	2	0	1	0	0	0	0	0	1	0	0	0	0
chr2	120475937	120476615	12	1	1	1	1	1	1	1	1	1	1	1	1
chr2	120465831	120466754	1	0	1	0	0	0	0	0	0	0	0	0	0
chr2	120461043	120462658	5	1	0	0	1	1	1	0	0	0	0	1	0
chr2	120434613	120436083	8	1	1	1	1	1	1	0	1	0	0	1	0
chr2	120381882	120384067	5	0	0	1	0	1	1	0	0	0	1	0	1
chr2	120358095	120359826	1	1	0	0	0	0	0	0	0	0	0	0	0
chr2	120342182	120351252	12	1	1	1	1	1	1	1	1	1	1	1	1
chr2	120319440	120320749	8	1	0	0	1	1	1	1	0	0	1	1	1
chr2	120278551	120279081	3	0	0	0	0	1	0	0	1	0	0	1	0
chr2	120268936	120274652	12	1	1	1	1	1	1	1	1	1	1	1	1
chr2	120237473	120251683	6	0	0	1	0	0	0	1	1	1	1	1	0
chr2	119702778	119703531	2	1	0	0	0	0	0	0	1	0	0	0	0
chr2	119482766	119483661	5	1	1	0	0	0	0	0	1	1	0	1	0
chr2	119475909	119478563	12	1	1	1	1	1	1	1	1	1	1	1	1
chr2	119428880	119433233	12	1	1	1	1	1	1	1	1	1	1	1	1
chr11	58912462	58912708	9	0	1	1	1	1	0	1	1	1	1	1	0
chr2	119362714	119364502	9	1	1	1	0	1	0	1	1	0	1	1	1
chr2	119289933	119296449	12	1	1	1	1	1	1	1	1	1	1	1	1
chr17	79827256	79827345	12	1	1	1	1	1	1	1	1	1	1	1	1
chr2	119255800	119257742	1	0	0	0	0	0	0	0	1	0	0	0	0
chr2	119249184	119255107	12	1	1	1	1	1	1	1	1	1	1	1	1
chr1	163037614	163037692	12	1	1	1	1	1	1	1	1	1	1	1	1
chr2	119236642	119246745	7	1	1	1	0	1	0	0	1	1	0	1	0
chr2	119233531	119234514	2	0	1	0	0	0	0	0	1	0	0	0	0
chr2	119225420	119232606	12	1	1	1	1	1	1	1	1	1	1	1	1
chr2	119166355	119167455	5	0	1	0	0	1	0	0	1	0	0	1	1
chr2	119142115	119143725	12	1	1	1	1	1	1	1	1	1	1	1	1
chr2	119129641	119130517	1	0	0	0	0	0	0	0	1	0	0	0	0
chr2	119116239	119117780	3	0	0	1	0	0	1	0	0	0	0	1	0
chr2	119114197	119114633	1	0	0	0	0	0	0	0	1	0	0	0	0
chr2	119010505	119012405	4	1	0	0	0	1	0	0	1	0	1	0	0
chr2	118985140	118989922	1	0	0	0	0	0	0	0	1	0	0	0	0
chr2	118881701	118883184	9	1	1	1	0	1	0	1	1	1	0	1	1
chr2	118865080	118865527	9	1	1	1	0	1	1	1	1	0	0	1	1
chr2	118838689	118857451	12	1	1	1	1	1	1	1	1	1	1	1	1
chr2	118831343	118836932	7	1	1	1	0	1	0	1	1	0	1	0	0
chr2	118795858	118796428	6	0	1	0	0	1	0	0	1	1	0	1	1
chr2	118730882	118732358	11	1	1	1	1	1	1	0	1	1	1	1	1
chr2	118692686	118693876	9	1	0	1	1	1	1	0	1	0	1	1	1
chr2	118668257	118669791	1	0	0	1	0	0	0	0	0	0	0	0	0
chr2	118664531	118666828	2	0	0	0	0	1	1	0	0	0	0	0	0
chr2	118660522	118662580	12	1	1	1	1	1	1	1	1	1	1	1	1
chr2	118657484	118658797	6	1	1	1	0	0	0	0	1	0	1	1	0
chr2	118584540	118585466	1	0	0	0	0	0	0	0	1	0	0	0	0
chr2	118506539	118506698	1	0	0	0	0	0	0	0	1	0	0	0	0
chr2	118474035	118477917	12	1	1	1	1	1	1	1	1	1	1	1	1
chr2	118466332	118466999	2	0	1	0	0	0	0	0	1	0	0	0	0
chr2	118463565	118464188	2	0	0	0	0	1	0	0	0	0	0	1	0
chr2	118432786	118433083	1	1	0	0	0	0	0	0	0	0	0	0	0
chr2	118430895	118432532	10	1	1	1	0	1	1	0	1	1	1	1	1
chr2	118425011	118425562	1	0	1	0	0	0	0	0	0	0	0	0	0
chr2	118385127	118385760	1	1	0	0	0	0	0	0	0	0	0	0	0
chr2	118371055	118374046	7	1	1	1	0	1	0	1	1	1	0	0	0
chr2	118309467	118310917	3	1	1	0	0	0	0	0	0	0	0	0	1
chr2	118223491	118225897	12	1	1	1	1	1	1	1	1	1	1	1	1
chr2	118072597	118073815	3	0	1	1	0	0	0	0	1	0	0	0	0
chr2	118046604	118051793	10	1	1	1	1	1	1	0	1	1	0	1	1
chr2	118000564	118003933	11	1	1	1	1	1	1	0	1	1	1	1	1
chr2	117986268	117988517	2	0	0	0	0	1	1	0	0	0	0	0	0
chr2	117972940	117977950	2	0	0	0	0	0	0	0	1	1	0	0	0
chr2	117835631	117836051	1	0	0	0	0	0	0	0	1	0	0	0	0
chr2	117726170	117727001	4	1	1	0	0	0	0	0	1	1	0	0	0
chr2	117691560	117693698	12	1	1	1	1	1	1	1	1	1	1	1	1
chr2	117679310	117680177	9	1	1	1	0	1	1	0	1	1	0	1	1
chr8	69015939	69018089	9	1	1	1	1	1	0	1	1	1	1	0	0
chr8	69024927	69034893	12	1	1	1	1	1	1	1	1	1	1	1	1
chr2	117211929	117212818	5	1	1	0	1	1	1	0	0	0	0	0	0
chr8	69093904	69095297	9	1	1	0	0	1	0	1	1	1	1	1	1
chr8	69105097	69106405	4	0	1	1	0	0	0	0	1	1	0	0	0
chr8	69106867	69106944	1	0	0	0	0	0	0	0	1	0	0	0	0
chr8	69109171	69110393	4	0	0	1	0	1	0	0	0	0	1	1	0
chr14	74133440	74133672	4	0	0	1	0	1	0	0	0	0	1	1	0
chr2	63684272	63684737	4	0	0	1	0	1	0	0	0	0	1	1	0
chr8	69114220	69114381	4	0	0	0	0	1	0	0	1	1	0	1	0
chr8	69143820	69146605	6	1	0	0	1	1	1	0	0	0	1	1	0
chr2	115609865	115610787	1	0	0	0	0	0	0	0	1	0	0	0	0
chr2	115274231	115275187	5	1	0	0	1	1	0	0	1	0	0	1	0
chr8	69177495	69179356	4	1	1	0	0	1	0	0	1	0	0	0	0
chr2	115232549	115234198	12	1	1	1	1	1	1	1	1	1	1	1	1
chr2	115221379	115223333	1	0	0	0	0	1	0	0	0	0	0	0	0
chr8	69180958	69182535	4	1	1	0	0	0	0	0	1	1	0	0	0
chr2	114761766	114762128	6	1	1	1	0	1	0	0	1	1	0	0	0
chr8	69250975	69253982	9	1	1	1	1	1	0	0	1	1	1	1	0
chr8	69267343	69271031	12	1	1	1	1	1	1	1	1	1	1	1	1
chr8	69274205	69279480	12	1	1	1	1	1	1	1	1	1	1	1	1
chr2	114116101	114117222	2	1	0	1	0	0	0	0	0	0	0	0	0
chr2	113987029	113987219	7	0	0	0	1	0	1	0	1	1	1	1	1
chr2	113964034	113966879	12	1	1	1	1	1	1	1	1	1	1	1	1
chr8	69310827	69311860	2	0	0	0	0	1	1	0	0	0	0	0	0
chr2	113896450	113897294	4	1	0	0	1	1	0	0	0	0	1	0	0
chr2	113877685	113878369	1	0	0	0	0	0	0	0	1	0	0	0	0
chr2	113843206	113844447	4	1	1	0	0	0	0	0	1	1	0	0	0
chr2	113823768	113824588	1	0	0	0	0	0	0	0	1	0	0	0	0
chr2	113785241	113785812	10	1	1	1	1	1	1	1	1	1	1	0	0
chr2	113760304	113761322	4	1	0	1	0	0	0	1	0	1	0	0	0
chr2	132415832	132417913	11	1	1	1	1	1	1	1	1	1	0	1	1
chr2	132438685	132439921	9	1	1	1	0	0	0	1	1	1	1	1	1
chr8	69359202	69360380	8	1	1	1	0	1	1	1	1	1	0	0	0
chr2	132693948	132695063	3	1	0	1	0	1	0	0	0	0	0	0	0
chr8	69393737	69400389	12	1	1	1	1	1	1	1	1	1	1	1	1
chr3	179460795	179461226	12	1	1	1	1	1	1	1	1	1	1	1	1
chr2	132922675	132923650	3	1	0	0	0	0	0	0	1	1	0	0	0
chr8	69401015	69403026	9	1	1	1	0	1	0	1	1	1	1	1	0
chr8	69403247	69404336	9	1	1	1	0	1	0	0	1	1	1	1	1
chr2	133097621	133099315	1	0	0	0	0	1	0	0	0	0	0	0	0
chr2	133162790	133162927	1	0	0	0	0	0	0	0	1	0	0	0	0
chr2	133284623	133286708	11	1	1	1	1	1	1	0	1	1	1	1	1
chr2	133303132	133303689	2	0	0	0	0	0	0	0	1	0	0	1	0
chr2	133309669	133314426	2	1	0	0	0	0	0	0	1	0	0	0	0
chr2	133323954	133324702	7	1	1	1	0	1	0	0	1	1	0	1	0
chr2	133356979	133357305	10	1	1	1	1	1	1	0	1	0	1	1	1
chr2	133398970	133403578	6	0	1	0	0	1	0	0	1	0	1	1	1
chr2	133424753	133425042	1	0	0	0	0	0	0	0	1	0	0	0	0
chr2	133437984	133438515	1	0	0	0	0	0	0	0	1	0	0	0	0
chr2	133486597	133487519	2	0	0	0	0	0	0	0	1	0	0	1	0
chr2	133517068	133518014	1	0	0	0	0	0	0	0	1	0	0	0	0
chr8	69446565	69448297	3	1	0	0	0	1	1	0	0	0	0	0	0
chr2	133561829	133562140	9	0	1	1	1	0	1	1	1	1	1	0	1
chr2	133565949	133569304	12	1	1	1	1	1	1	1	1	1	1	1	1
chr2	133580523	133581824	1	0	0	0	0	0	0	0	1	0	0	0	0
chr2	133586256	133587801	3	0	1	1	0	0	0	0	1	0	0	0	0
chr2	133606033	133607370	2	1	0	0	0	0	0	0	1	0	0	0	0
chr2	133633393	133634677	12	1	1	1	1	1	1	1	1	1	1	1	1
chr2	133651870	133653550	8	1	1	1	1	1	1	0	0	1	0	1	0
chr2	133657363	133659073	12	1	1	1	1	1	1	1	1	1	1	1	1
chr2	133718625	133719912	11	1	1	1	1	0	1	1	1	1	1	1	1
chr8	69463847	69465483	3	0	0	0	1	0	0	0	1	0	0	1	0
chr2	133749572	133750574	8	1	1	1	0	1	0	1	1	1	0	1	0
chr2	133765593	133767071	4	1	1	1	0	0	0	0	1	0	0	0	0
chr2	133776041	133778309	4	1	0	0	0	0	1	1	1	0	0	0	0
chr2	133841616	133845616	7	0	1	1	0	1	1	1	1	0	0	0	1
chr2	133846702	133851668	12	1	1	1	1	1	1	1	1	1	1	1	1
chr8	69488237	69489115	2	0	0	0	0	0	0	0	1	0	0	1	0
chr2	134073477	134074292	1	0	0	0	0	0	0	0	1	0	0	0	0
chr2	134127114	134132246	9	0	1	1	1	1	1	1	1	1	0	1	0
chr2	134153315	134163297	12	1	1	1	1	1	1	1	1	1	1	1	1
chr2	134188934	134190176	8	1	1	1	0	1	0	1	1	1	0	1	0
chr2	134232765	134234189	1	0	0	0	0	0	0	0	1	0	0	0	0
chr2	134245312	134247990	1	0	0	0	0	0	0	0	1	0	0	0	0
chr2	134257873	134259924	12	1	1	1	1	1	1	1	1	1	1	1	1
chr2	134295150	134296113	1	0	1	0	0	0	0	0	0	0	0	0	0
chr2	134323509	134324190	1	0	0	0	0	1	0	0	0	0	0	0	0
chr2	134331331	134335450	12	1	1	1	1	1	1	1	1	1	1	1	1
chr2	134341323	134342473	4	1	0	1	0	1	0	1	0	0	0	0	0
chr2	134349273	134353911	10	1	1	0	1	1	0	1	1	1	1	1	1
chr2	134359481	134360069	1	0	0	0	0	0	0	0	1	0	0	0	0
chr2	134378360	134380132	12	1	1	1	1	1	1	1	1	1	1	1	1
chr2	134393200	134399739	7	1	1	1	0	0	0	1	1	1	0	1	0
chr2	134400328	134402813	4	1	0	0	1	1	1	0	0	0	0	0	0
chr8	69520355	69521243	1	0	1	0	0	0	0	0	0	0	0	0	0
chr21	43581930	43582686	1	0	0	0	0	0	0	0	0	1	0	0	0
chr21	43582163	43582243	1	0	0	0	0	0	0	0	0	1	0	0	0
chr2	134460468	134461309	8	1	1	1	0	1	1	0	1	0	1	1	0
chr8	69534708	69535744	2	0	0	0	0	0	0	0	1	0	0	1	0
chr8	69536859	69541711	5	1	1	0	0	0	0	1	1	1	0	0	0
chr2	134668649	134670562	8	1	1	1	1	1	1	0	1	0	0	1	0
chr2	134716908	134721275	12	1	1	1	1	1	1	1	1	1	1	1	1
chr8	69552444	69556037	6	1	1	0	0	1	0	0	1	1	0	1	0
chr2	134870712	134871059	1	0	0	0	0	0	1	0	0	0	0	0	0
chr2	134921204	134922016	1	0	0	0	0	0	0	0	1	0	0	0	0
chr2	135000145	135004446	3	0	0	0	0	1	0	0	1	0	0	1	0
chr8	69561800	69564698	12	1	1	1	1	1	1	1	1	1	1	1	1
chr2	135040351	135040666	10	1	1	1	0	1	1	0	1	1	1	1	1
chr8	69573604	69575261	2	0	0	0	0	0	0	1	1	0	0	0	0
chr2	135228736	135231155	11	1	1	1	0	1	1	1	1	1	1	1	1
chr8	69577324	69581169	10	1	1	1	0	1	0	1	1	1	1	1	1
chr2	135421607	135421661	11	1	1	1	1	1	1	0	1	1	1	1	1
chr8	69602914	69604528	2	0	0	0	0	0	0	0	1	1	0	0	0
chr8	69614512	69623631	12	1	1	1	1	1	1	1	1	1	1	1	1
chr2	135948895	135950241	7	1	1	0	0	1	0	1	1	1	0	1	0
chr2	136051896	136052571	1	0	0	0	0	0	0	0	1	0	0	0	0
chr2	136115695	136121767	12	1	1	1	1	1	1	1	1	1	1	1	1
chr2	136135532	136137020	11	1	1	1	0	1	1	1	1	1	1	1	1
chr2	136140806	136143215	10	1	1	1	0	1	0	1	1	1	1	1	1
chr8	69672311	69673705	4	1	1	0	0	1	0	0	1	0	0	0	0
chr8	69676097	69676765	6	1	0	0	0	1	1	0	1	0	1	1	0
chr8	69676584	69676641	6	1	0	0	0	1	1	0	1	0	1	1	0
chr2	136300536	136301637	1	0	0	0	0	0	0	0	1	0	0	0	0
chr8	69677188	69679576	5	1	0	1	0	0	1	1	1	0	0	0	0
chr2	136336656	136342617	3	1	1	0	0	0	0	0	1	0	0	0	0
chr2	136377896	136380473	11	1	1	1	1	1	1	1	1	1	1	0	1
chr2	136384116	136387413	12	1	1	1	1	1	1	1	1	1	1	1	1
chr2	136422139	136423663	10	1	1	1	1	1	0	1	1	1	0	1	1
chr7	4248473	4248616	10	1	1	1	1	1	0	1	1	1	0	1	1
chr2	136752332	136753075	1	0	0	0	0	0	0	0	1	0	0	0	0
chr8	69778794	69779060	2	0	0	0	0	0	1	0	0	0	0	1	0
chr8	69811575	69812746	2	0	0	0	0	0	0	0	1	0	0	1	0
chr2	137275772	137276617	2	0	0	0	0	0	0	1	0	1	0	0	0
chr8	69831636	69835771	12	1	1	1	1	1	1	1	1	1	1	1	1
chr8	69850239	69852383	4	1	1	1	0	0	0	0	1	0	0	0	0
chr2	137545445	137548712	2	0	0	0	0	1	1	0	0	0	0	0	0
chr2	137768974	137770352	1	1	0	0	0	0	0	0	0	0	0	0	0
chr2	137838405	137838703	1	1	0	0	0	0	0	0	0	0	0	0	0
chr13	18641063	18643253	5	1	1	0	1	1	0	0	1	0	0	0	0
chr1	207322355	207322733	9	0	0	1	1	1	1	1	1	0	1	1	1
chr1	207318780	207319616	9	0	0	1	1	1	1	1	1	0	1	1	1
chr1	207299890	207301292	1	0	0	0	0	0	0	0	1	0	0	0	0
chr1	207296853	207297209	2	0	0	0	1	0	0	0	0	0	0	1	0
chr8	69941872	69946639	11	1	1	1	1	1	1	1	1	1	0	1	1
chr1	207057993	207059960	6	1	1	1	0	0	0	1	1	1	0	0	0
chr1	207028745	207034133	8	1	1	1	0	1	0	1	1	0	1	1	0
chr1	207026990	207027712	1	0	0	0	0	0	0	0	1	0	0	0	0
chr1	207021654	207026140	1	0	0	0	0	0	0	0	0	0	0	1	0
chr1	206965365	206968056	2	0	1	1	0	0	0	0	0	0	0	0	0
chr1	206904999	206913602	12	1	1	1	1	1	1	1	1	1	1	1	1
chr1	206780727	206781017	1	0	0	0	0	0	0	0	1	0	0	0	0
chr1	206769841	206772036	1	0	0	0	0	0	0	0	1	0	0	0	0
chr8	70034868	70035526	11	1	1	1	0	1	1	1	1	1	1	1	1
chr1	206749783	206750258	2	0	0	0	0	1	0	0	1	0	0	0	0
chr1	206742965	206746222	8	1	1	1	0	1	0	1	1	1	0	1	0
chr1	206718626	206728268	4	1	0	0	0	1	0	0	0	1	0	1	0
chr1	206700433	206704790	2	0	0	0	0	0	0	1	1	0	0	0	0
chr1	206689691	206695675	10	1	1	1	0	1	0	1	1	1	1	1	1
chr1	206674315	206675568	12	1	1	1	1	1	1	1	1	1	1	1	1
chr1	206665786	206671990	11	1	1	1	1	1	0	1	1	1	1	1	1
chr1	206659340	206663346	10	1	1	1	0	1	1	1	0	1	1	1	1
chr1	206649741	206658844	12	1	1	1	1	1	1	1	1	1	1	1	1
chr1	206582232	206585495	8	1	1	0	1	1	0	1	1	0	0	1	1
chr1	206577603	206582066	12	1	1	1	1	1	1	1	1	1	1	1	1
chr1	206555244	206559544	9	1	1	0	1	1	0	1	1	1	1	1	0
chr1	206539823	206545015	12	1	1	1	1	1	1	1	1	1	1	1	1
chr1	206512448	206514602	7	1	1	1	0	1	0	0	1	1	0	1	0
chr8	70067779	70072395	12	1	1	1	1	1	1	1	1	1	1	1	1
chr1	206489557	206494249	9	1	1	1	1	1	1	0	0	1	0	1	1
chr1	206477304	206482421	12	1	1	1	1	1	1	1	1	1	1	1	1
chr1	206472182	206475562	1	0	0	0	0	0	0	0	0	0	1	0	0
chr1	206468153	206471822	5	1	1	0	0	1	0	0	1	0	0	1	0
chr1	206461204	206464812	9	1	1	1	0	1	0	1	1	1	0	1	1
chr1	206454212	206456029	2	0	0	0	0	0	0	0	1	1	0	0	0
chr1	206448387	206452099	4	0	0	0	0	0	0	1	1	1	1	0	0
chr1	206346865	206348744	1	0	0	0	0	0	0	0	1	0	0	0	0
chr8	70121296	70124681	3	0	0	0	0	0	0	0	1	1	0	1	0
chr1	206238226	206239777	7	0	1	0	0	1	0	1	1	1	1	1	0
chr1	206224373	206225420	2	0	0	0	0	0	0	0	1	1	0	0	0
chr1	206207827	206209531	6	0	1	1	0	1	0	1	0	1	1	0	0
chr1	206181579	206184381	9	1	1	1	0	1	1	0	1	0	1	1	1
chr1	206173990	206175391	7	1	1	1	0	1	0	1	1	0	0	1	0
chr8	70137879	70144160	5	1	0	0	0	1	0	0	1	1	0	1	0
chr1	206115814	206118433	12	1	1	1	1	1	1	1	1	1	1	1	1
chr1	206106178	206107200	8	1	1	0	0	1	1	1	1	0	0	1	1
chr1	206002690	206005260	4	1	1	0	0	0	0	0	1	1	0	0	0
chr1	206000212	206002690	7	1	1	1	0	1	1	0	1	0	0	1	0
chr1	205937724	205939698	5	1	1	0	0	0	0	0	1	1	0	1	0
chr1	205918251	205920256	4	1	0	0	0	1	0	1	0	0	0	1	0
chr1	205847818	205850636	12	1	1	1	1	1	1	1	1	1	1	1	1
chr1	205817105	205819636	1	1	0	0	0	0	0	0	0	0	0	0	0
chr8	70178559	70182399	12	1	1	1	1	1	1	1	1	1	1	1	1
chr1	205678347	205683586	12	1	1	1	1	1	1	1	1	1	1	1	1
chr1	205665335	205672943	7	1	0	0	0	1	1	0	1	0	1	1	1
chr1	205656971	205660254	10	1	1	1	1	1	1	0	1	0	1	1	1
chr1	205598644	205600453	1	1	0	0	0	0	0	0	0	0	0	0	0
chr1	205590935	205594173	9	1	1	1	1	1	1	0	1	0	1	0	1
chr8	70189195	70190296	1	0	0	0	0	0	0	0	0	0	1	0	0
chr1	205528078	205529905	1	0	0	0	0	0	0	0	0	0	1	0	0
chr1	205511285	205513085	4	0	1	0	0	0	0	0	1	1	0	1	0
chr1	205502698	205508414	12	1	1	1	1	1	1	1	1	1	1	1	1
chr1	205491064	205492209	1	0	0	0	0	0	0	0	1	0	0	0	0
chr1	205480469	205488500	12	1	1	1	1	1	1	1	1	1	1	1	1
chr1	205472082	205473249	1	0	0	0	0	0	0	0	0	0	1	0	0
chr1	205467299	205471592	11	1	1	1	1	1	1	1	1	1	1	1	0
chr1	205448137	205451700	9	0	1	1	1	0	0	1	1	1	1	1	1
chr1	205429637	205436476	11	1	1	1	0	1	1	1	1	1	1	1	1
chr1	205396976	205397798	1	1	0	0	0	0	0	0	0	0	0	0	0
chr1	205353069	205355544	5	1	0	0	0	1	0	1	1	0	0	1	0
chr1	205346389	205347428	6	1	1	0	0	1	0	0	1	1	0	0	1
chr1	205342863	205345419	12	1	1	1	1	1	1	1	1	1	1	1	1
chr1	205331272	205336154	2	1	0	0	0	1	0	0	0	0	0	0	0
chr1	205316779	205319974	3	0	0	1	0	0	0	1	1	0	0	0	0
chr1	205308428	205310348	2	1	0	0	0	0	0	0	0	0	1	0	0
chr1	205300999	205302029	1	0	0	0	0	0	1	0	0	0	0	0	0
chr1	205298244	205299934	2	0	0	1	0	0	0	0	1	0	0	0	0
chr1	205275834	205278139	2	0	0	0	0	0	0	1	1	0	0	0	0
chr1	205255482	205258453	11	1	1	1	1	1	1	0	1	1	1	1	1
chr1	205245414	205251076	10	1	1	0	0	1	1	1	1	1	1	1	1
chr1	205230562	205233393	5	1	1	0	0	1	0	0	1	0	0	1	0
chr1	205190137	205191333	1	0	0	0	0	0	0	1	0	0	0	0	0
chr1	205183674	205184119	1	0	0	0	0	0	0	0	0	1	0	0	0
chr1	205120263	205122706	12	1	1	1	1	1	1	1	1	1	1	1	1
chr1	205065881	205069155	3	1	0	0	0	1	0	0	0	0	1	0	0
chr1	205043840	205045904	2	0	0	0	0	0	0	1	0	1	0	0	0
chr8	70258760	70260790	3	0	0	0	0	0	0	1	1	0	1	0	0
chr1	204996551	204998968	3	1	0	0	0	0	0	0	1	0	0	1	0
chr1	204988913	204990237	2	1	0	0	0	1	0	0	0	0	0	0	0
chr1	204980538	204982744	6	1	0	0	1	1	1	0	0	0	0	1	1
chr8	70266328	70267918	2	0	1	0	0	0	0	0	1	0	0	0	0
chr1	204870155	204871936	1	0	0	0	0	0	0	0	1	0	0	0	0
chr1	204689779	204690700	1	0	0	0	0	0	1	0	0	0	0	0	0
chr1	204637283	204638292	1	0	0	0	0	0	0	0	0	0	0	1	0
chr1	204621917	204622828	2	0	0	0	0	0	1	0	1	0	0	0	0
chr1	204608426	204610309	4	0	1	1	0	1	0	0	1	0	0	0	0
chr8	70309649	70311530	1	0	0	0	0	1	0	0	0	0	0	0	0
chr8	70313724	70325246	5	1	0	0	0	1	0	1	1	1	0	0	0
chr1	204505288	204508220	12	1	1	1	1	1	1	1	1	1	1	1	1
chr1	204476876	204478126	12	1	1	1	1	1	1	1	1	1	1	1	1
chr1	204456738	204459712	7	1	1	1	0	1	0	0	1	1	0	1	0
chr1	204445700	204447642	4	1	0	0	1	1	0	1	0	0	0	0	0
chr1	204429939	204432123	3	1	0	0	1	0	0	0	0	0	0	0	1
chr1	204398477	204399143	2	0	0	0	0	1	0	0	0	0	0	1	0
chr1	204383178	204385310	1	0	0	0	0	0	1	0	0	0	0	0	0
chr1	204376353	204380758	12	1	1	1	1	1	1	1	1	1	1	1	1
chr1	204361296	204364326	7	1	0	0	1	0	0	1	1	1	1	0	1
chr16	89188502	89188845	7	1	0	0	1	0	0	1	1	1	1	0	1
chr1	204325682	204329369	12	1	1	1	1	1	1	1	1	1	1	1	1
chr1	204317393	204319694	6	1	1	0	0	0	0	1	1	1	0	1	0
chr1	204305098	204309103	12	1	1	1	1	1	1	1	1	1	1	1	1
chr1	204295251	204298261	11	1	1	1	1	1	1	1	1	0	1	1	1
chr1	204291802	204293633	6	0	1	1	0	1	0	0	1	1	1	0	0
chr1	204286995	204289798	7	1	0	0	1	1	1	0	0	0	1	1	1
chr8	70352906	70354184	2	0	0	0	0	0	0	0	1	0	0	1	0
chr1	204225777	204226872	1	1	0	0	0	0	0	0	0	0	0	0	0
chr1	204221360	204225128	11	1	1	1	1	1	1	1	1	0	1	1	1
chr1	204219484	204220219	1	0	0	0	0	0	0	0	1	0	0	0	0
chr1	204215983	204217387	3	0	1	0	0	0	1	1	0	0	0	0	0
chr1	204190197	204191827	10	1	1	0	1	1	1	1	1	0	1	1	1
chr1	204154741	204173394	12	1	1	1	1	1	1	1	1	1	1	1	1
chr1	204117374	204131656	8	1	0	1	0	1	1	1	0	0	1	1	1
chr1	204078107	204082986	8	0	0	1	1	1	1	0	1	0	1	1	1
chr1	204071559	204075872	12	1	1	1	1	1	1	1	1	1	1	1	1
chr1	204064941	204066196	8	1	1	0	1	1	1	0	1	0	1	1	0
chr1	204044364	204046217	3	0	0	0	1	1	1	0	0	0	0	0	0
chr8	70371676	70372932	1	0	0	0	0	0	0	0	1	0	0	0	0
chr1	204024331	204026736	2	0	1	0	0	0	0	0	1	0	0	0	0
chr1	203870986	203872016	12	1	1	1	1	1	1	1	1	1	1	1	1
chr1	203750357	203755799	4	0	0	0	1	1	1	0	0	0	1	0	0
chr1	203730532	203733993	12	1	1	1	1	1	1	1	1	1	1	1	1
chr1	203706693	203707835	10	1	1	1	1	1	1	1	0	0	1	1	1
chr1	203691270	203697651	12	1	1	1	1	1	1	1	1	1	1	1	1
chr1	203690516	203691239	4	0	0	0	1	0	1	1	0	0	1	0	0
chr1	203671825	203673101	1	0	0	0	0	0	0	0	0	0	1	0	0
chr1	203666085	203670776	8	0	0	0	0	1	1	1	1	1	1	1	1
chr1	203649669	203650655	3	0	0	0	1	1	0	0	0	0	1	0	0
chr1	203625566	203630297	12	1	1	1	1	1	1	1	1	1	1	1	1
chr1	203555833	203559380	7	1	0	0	1	1	1	0	1	0	1	1	0
chr1	203521957	203522476	1	1	0	0	0	0	0	0	0	0	0	0	0
chr1	203510346	203513612	10	1	0	1	1	1	1	1	1	0	1	1	1
chr1	203506493	203508098	1	0	0	0	0	0	0	1	0	0	0	0	0
chr1	203504186	203505984	4	1	0	0	1	0	1	0	0	0	1	0	0
chr1	203471645	203481775	12	1	1	1	1	1	1	1	1	1	1	1	1
chr1	203454900	203456544	12	1	1	1	1	1	1	1	1	1	1	1	1
chr1	203448238	203449970	7	1	1	0	0	0	0	1	1	1	1	1	0
chr1	203440374	203441997	10	1	1	1	1	1	1	0	1	0	1	1	1
chr1	203434957	203439626	3	1	0	0	0	0	0	0	1	1	0	0	0
chr1	203407897	203410380	9	1	1	1	1	1	1	0	0	1	0	1	1
chr1	203378559	203382534	11	1	1	1	0	1	1	1	1	1	1	1	1
chr1	203349368	203353131	11	1	1	1	1	1	1	1	1	0	1	1	1
chr1	203340089	203347023	9	1	0	1	1	1	1	1	0	0	1	1	1
chr1	203319553	203323772	12	1	1	1	1	1	1	1	1	1	1	1	1
chr1	203296975	203302276	12	1	1	1	1	1	1	1	1	1	1	1	1
chr1	203272090	203275277	10	1	1	1	1	1	0	1	1	1	1	1	0
chr1	203215706	203218659	9	1	1	1	1	1	1	1	1	1	0	0	0
chr8	70437518	70439161	6	0	1	0	0	1	0	1	1	1	1	0	0
chr1	203189879	203191278	2	1	0	0	0	0	0	0	0	0	0	1	0
chr1	203186222	203187614	5	1	0	0	0	1	0	0	1	1	0	1	0
chr1	203170398	203178573	10	1	1	1	0	1	1	1	1	1	1	1	0
chr1	203153500	203156117	1	1	0	0	0	0	0	0	0	0	0	0	0
chr1	203124711	203130972	12	1	1	1	1	1	1	1	1	1	1	1	1
chr1	203115884	203120101	12	1	1	1	1	1	1	1	1	1	1	1	1
chr1	203101957	203104323	8	1	1	1	1	1	1	0	0	0	1	0	1
chr1	203085255	203086857	2	0	0	0	1	0	0	0	0	0	1	0	0
chr1	203082565	203084501	2	0	0	0	1	0	0	0	1	0	0	0	0
chr1	203071708	203078705	12	1	1	1	1	1	1	1	1	1	1	1	1
chr1	203050821	203057270	8	1	1	0	1	1	1	0	0	1	0	1	1
chr1	203031944	203044483	12	1	1	1	1	1	1	1	1	1	1	1	1
chr1	203025053	203029397	12	1	1	1	1	1	1	1	1	1	1	1	1
chr1	202953051	202955233	8	0	1	1	0	1	1	1	1	0	1	1	0
chr1	202860167	202863161	12	1	1	1	1	1	1	1	1	1	1	1	1
chr1	204553610	204554249	12	1	1	1	1	1	1	1	1	1	1	1	1
chr1	202856601	202860159	8	1	1	0	1	1	1	1	1	0	0	1	0
chr6	117998927	117999585	8	1	1	0	1	1	1	1	1	0	0	1	0
chr1	202805992	202809316	12	1	1	1	1	1	1	1	1	1	1	1	1
chr1	202707298	202713273	12	1	1	1	1	1	1	1	1	1	1	1	1
chr1	202703696	202706825	12	1	1	1	1	1	1	1	1	1	1	1	1
chr1	202657854	202661723	2	0	0	0	1	0	1	0	0	0	0	0	0
chr1	202640204	202651534	12	1	1	1	1	1	1	1	1	1	1	1	1
chr1	202583451	202590509	7	1	1	0	0	1	0	1	1	1	0	1	0
chr1	202538288	202539966	2	1	0	0	0	0	0	0	0	0	1	0	0
chr1	202530401	202531178	6	1	0	0	1	1	1	0	0	0	1	1	0
chr1	202519925	202528107	10	1	1	1	1	1	1	1	1	0	1	1	0
chr1	202516467	202516841	5	1	1	0	1	1	0	0	1	0	0	0	0
chr1	202405525	202406526	1	0	0	1	0	0	0	0	0	0	0	0	0
chr8	70514144	70515450	1	1	0	0	0	0	0	0	0	0	0	0	0
chr1	202316657	202319751	12	1	1	1	1	1	1	1	1	1	1	1	1
chr1	202311085	202312641	11	1	1	1	1	1	1	1	1	0	1	1	1
chr1	202307499	202309699	2	0	0	0	0	0	0	0	1	0	1	0	0
chr1	202280142	202290380	12	1	1	1	1	1	1	1	1	1	1	1	1
chr1	202255464	202255707	1	0	0	0	0	0	0	1	0	0	0	0	0
chr1	202240987	202241870	1	0	0	0	0	0	0	0	1	0	0	0	0
chr1	202209915	202211018	3	0	0	1	1	0	0	0	0	0	0	1	0
chr1	202190387	202202247	12	1	1	1	1	1	1	1	1	1	1	1	1
chr9	92139829	92139969	12	1	1	1	1	1	1	1	1	1	1	1	1
chr1	202184159	202189948	11	1	1	1	1	1	1	1	1	0	1	1	1
chr1	202158706	202170114	12	1	1	1	1	1	1	1	1	1	1	1	1
chr1	202118703	202119172	1	0	0	0	1	0	0	0	0	0	0	0	0
chr1	202084341	202086302	8	1	1	0	1	1	0	1	1	0	1	1	0
chr1	202042783	202042890	7	0	0	0	1	1	1	1	0	1	0	1	1
chr1	202022787	202023538	2	1	0	0	0	0	0	0	0	0	1	0	0
chr1	202009636	202016282	12	1	1	1	1	1	1	1	1	1	1	1	1
chr1	201999575	202000244	1	0	0	0	0	0	0	0	1	0	0	0	0
chr8	70533390	70534925	10	1	1	1	0	1	0	1	1	1	1	1	1
chr1	201944750	201947918	12	1	1	1	1	1	1	1	1	1	1	1	1
chr1	201917060	201918527	2	0	0	0	1	1	0	0	0	0	0	0	0
chr1	201825883	201826904	1	0	0	0	0	1	0	0	0	0	0	0	0
chr1	201786111	201787342	2	0	0	0	0	0	0	0	1	0	0	1	0
chr1	201759288	201762600	10	1	1	1	1	1	1	1	1	0	1	1	0
chr1	201749327	201751048	5	0	0	0	1	1	1	0	0	0	1	1	0
chr1	201738447	201744065	12	1	1	1	1	1	1	1	1	1	1	1	1
chr1	201730545	201737563	6	1	1	0	0	1	0	1	1	0	0	1	0
chr1	201711741	201717413	11	1	1	1	1	1	0	1	1	1	1	1	1
chr1	201705599	201711575	10	1	1	0	1	1	1	1	1	1	1	1	0
chr1	201702759	201704969	10	1	1	1	1	1	1	1	1	0	0	1	1
chr1	201695526	201696879	1	0	0	0	0	0	0	0	1	0	0	0	0
chr1	201673248	201678116	7	1	0	1	1	1	1	0	1	1	0	0	0
chr19	54522282	54522410	7	1	0	1	1	1	1	0	1	1	0	0	0
chr1	201671213	201671962	1	0	0	0	0	0	0	0	1	0	0	0	0
chr1	201653959	201657122	1	0	0	0	0	1	0	0	0	0	0	0	0
chr8	70555891	70559410	4	0	0	1	0	0	0	1	1	0	1	0	0
chr8	70788105	70791972	4	0	0	1	0	0	0	1	1	0	1	0	0
chr1	201630345	201633201	2	0	0	0	1	0	1	0	0	0	0	0	0
chr1	201613984	201615449	12	1	1	1	1	1	1	1	1	1	1	1	1
chr1	201591455	201595431	4	0	1	0	1	1	1	0	0	0	0	0	0
chr1	201569682	201572783	3	1	1	0	0	0	0	0	0	1	0	0	0
chr1	201565203	201565946	1	0	0	0	0	0	0	0	1	0	0	0	0
chr1	201561428	201563064	1	0	0	0	1	0	0	0	0	0	0	0	0
chr1	201511895	201513201	7	1	0	0	1	1	1	0	1	1	0	0	1
chr1	201498891	201505795	8	0	1	0	1	1	1	0	1	0	1	1	1
chr1	201495462	201497195	3	0	0	0	0	1	1	0	0	0	0	1	0
chr1	201478326	201480658	4	0	0	0	1	1	1	0	0	0	1	0	0
chr1	201475930	201476905	1	0	0	0	0	0	0	0	1	0	0	0	0
chr1	201470889	201472773	2	0	1	0	0	0	0	0	1	0	0	0	0
chr1	201460204	201464372	12	1	1	1	1	1	1	1	1	1	1	1	1
chr1	201450532	201451477	2	0	0	0	0	0	1	0	1	0	0	0	0
chr1	201447794	201449521	10	1	1	0	1	1	1	1	1	1	0	1	1
chr1	201435615	201437074	3	1	0	0	0	0	1	0	0	1	0	0	0
chr1	201425095	201428898	5	0	1	0	0	1	0	0	1	0	1	1	0
chr1	201419703	201422835	7	1	1	0	0	1	1	0	1	0	0	1	1
chr1	201408107	201409656	5	0	0	0	1	1	1	0	0	1	0	0	1
chr1	201394274	201403087	12	1	1	1	1	1	1	1	1	1	1	1	1
chr1	201358237	201359552	1	1	0	0	0	0	0	0	0	0	0	0	0
chr1	201346351	201349479	1	0	0	0	0	0	0	0	1	0	0	0	0
chr1	201343679	201345916	12	1	1	1	1	1	1	1	1	1	1	1	1
chr1	201319167	201320413	1	0	0	0	0	0	0	0	1	0	0	0	0
chr1	201295432	201296681	6	1	1	0	1	0	0	1	1	0	1	0	0
chr1	201281693	201284963	12	1	1	1	1	1	1	1	1	1	1	1	1
chr1	201251286	201260219	8	1	1	1	0	1	1	1	1	0	0	1	0
chr1	201222099	201224025	1	0	1	0	0	0	0	0	0	0	0	0	0
chr1	201169988	201172202	12	1	1	1	1	1	1	1	1	1	1	1	1
chr1	201125252	201128639	12	1	1	1	1	1	1	1	1	1	1	1	1
chr1	201121939	201123554	5	1	0	0	0	1	1	0	0	0	1	1	0
chr1	201038550	201042822	3	0	0	0	1	1	1	0	0	0	0	0	0
chr1	201027816	201028942	1	0	0	0	0	0	0	0	0	0	0	0	1
chr1	201008511	201022196	8	0	1	1	1	0	0	1	1	1	1	0	1
chr8	70633859	70634304	1	0	0	0	0	0	0	0	1	0	0	0	0
chr1	200971057	200975705	3	0	1	0	0	0	0	0	1	1	0	0	0
chr1	200913149	200916723	5	1	1	0	1	0	0	0	1	0	0	1	0
chr1	200894406	200898546	1	0	0	0	0	0	0	0	0	0	1	0	0
chr1	200855432	200856861	7	0	1	0	0	1	0	1	1	1	0	1	1
chr1	200832237	200833747	4	0	0	0	0	0	0	1	1	0	1	1	0
chr1	200780870	200782242	1	0	0	0	0	0	0	0	0	1	0	0	0
chr1	200758516	200758772	2	0	0	0	0	0	0	0	1	1	0	0	0
chr1	200757273	200758132	9	0	1	1	0	1	1	1	1	0	1	1	1
chr1	200722171	200726120	12	1	1	1	1	1	1	1	1	1	1	1	1
chr1	200721677	200721802	10	1	0	0	1	1	1	1	1	1	1	1	1
chr1	200716682	200716997	7	1	1	0	0	1	0	1	1	1	0	1	0
chr1	200622448	200624526	10	1	1	1	1	1	1	1	1	0	1	1	0
chr11	3892182	3892819	10	1	1	1	1	1	0	1	1	1	1	1	0
chr1	200569493	200572694	11	1	1	1	1	1	1	0	1	1	1	1	1
chr1	200558867	200559477	5	1	1	0	0	0	0	0	1	1	0	1	0
chr1	200555271	200556295	5	1	0	0	1	1	1	0	0	0	0	1	0
chr2	7323959	7324436	5	1	0	0	1	1	1	0	0	0	0	1	0
chr1	200525267	200526122	1	0	1	0	0	0	0	0	0	0	0	0	0
chr1	200510052	200512201	11	1	1	0	1	1	1	1	1	1	1	1	1
chr8	70663561	70664507	1	0	0	0	0	0	0	0	1	0	0	0	0
chr1	200495054	200503810	12	1	1	1	1	1	1	1	1	1	1	1	1
chr1	200464430	200465866	5	1	0	0	1	1	1	0	1	0	0	0	0
chr1	200378609	200380074	3	1	0	1	0	0	0	0	1	0	0	0	0
chr1	200373609	200376884	6	1	1	0	0	0	1	1	1	1	0	0	0
chr1	200371788	200373303	7	1	1	1	0	1	0	1	1	1	0	0	0
chr1	200362180	200370484	12	1	1	1	1	1	1	1	1	1	1	1	1
chr1	200351365	200355977	12	1	1	1	1	1	1	1	1	1	1	1	1
chr8	70674570	70679094	4	1	0	1	0	1	0	0	0	0	0	0	1
chr1	200335994	200338501	12	1	1	1	1	1	1	1	1	1	1	1	1
chr1	200314056	200315023	2	0	1	0	0	0	0	0	1	0	0	0	0
chr1	200301991	200306526	5	1	0	0	1	1	1	0	0	0	1	0	0
chr1	200261402	200261951	6	1	1	0	1	1	1	0	1	0	0	0	0
chr1	200178277	200180959	3	1	1	0	0	0	0	0	1	0	0	0	0
chr1	200034484	200037245	11	0	1	1	1	1	1	1	1	1	1	1	1
chr1	199982002	199983893	1	0	0	0	0	0	0	0	1	0	0	0	0
chr1	199855246	199856834	6	1	1	0	0	1	0	0	1	1	0	1	0
chr1	199708380	199710312	10	1	1	1	1	1	0	1	1	0	1	1	1
chr1	199690171	199692075	11	1	1	1	1	1	1	0	1	1	1	1	1
chr1	199458941	199459667	1	0	0	0	0	0	0	0	1	0	0	0	0
chr1	199441449	199449548	2	1	0	0	0	0	0	0	1	0	0	0	0
chr1	199403225	199405369	4	1	1	0	0	1	0	0	1	0	0	0	0
chr1	199290958	199299467	6	0	1	1	1	1	1	0	0	0	1	0	0
chr1	199287670	199288228	1	1	0	0	0	0	0	0	0	0	0	0	0
chr1	199273923	199274440	1	0	0	0	0	0	0	0	1	0	0	0	0
chr1	199271561	199273933	12	1	1	1	1	1	1	1	1	1	1	1	1
chr1	199274998	199275314	12	1	1	1	1	1	1	1	1	1	1	1	1
chr1	199245947	199246949	2	1	1	0	0	0	0	0	0	0	0	0	0
chr1	199188730	199189907	8	1	1	1	1	1	1	0	1	0	1	0	0
chr1	199172029	199172985	3	0	0	0	0	1	0	1	0	0	1	0	0
chr8	70818712	70819976	3	0	1	1	0	1	0	0	0	0	0	0	0
chr1	199028814	199030079	1	0	0	0	0	0	1	0	0	0	0	0	0
chr8	70831715	70836905	9	1	1	1	0	1	1	0	1	1	1	1	0
chr3	115991419	115991476	9	1	1	1	0	1	1	0	1	1	1	1	0
chrX	39786930	39786975	9	1	1	1	0	1	1	0	1	1	1	1	0
chr1	199019600	199021218	12	1	1	1	1	1	1	1	1	1	1	1	1
chr1	199012421	199014518	12	1	1	1	1	1	1	1	1	1	1	1	1
chr1	198982924	198984983	12	1	1	1	1	1	1	1	1	1	1	1	1
chr1	198901360	198901813	1	0	0	0	0	0	0	0	1	0	0	0	0
chr1	198894632	198896095	1	1	0	0	0	0	0	0	0	0	0	0	0
chr1	198848340	198850383	6	1	1	0	1	1	1	0	1	0	0	0	0
chr1	198793814	198795308	2	0	1	1	0	0	0	0	0	0	0	0	0
chr1	198776415	198778583	6	1	1	1	0	0	1	0	1	0	0	1	0
chr1	198774693	198776129	12	1	1	1	1	1	1	1	1	1	1	1	1
chr1	198771637	198772370	2	1	0	0	0	1	0	0	0	0	0	0	0
chr1	198620770	198623042	7	1	1	0	0	0	0	1	1	1	1	1	0
chr1	198605437	198608170	6	0	1	0	1	1	1	0	0	0	0	1	1
chr1	198559023	198561640	8	1	0	1	1	1	1	0	0	0	1	1	1
chr1	198556663	198557501	1	1	0	0	0	0	0	0	0	0	0	0	0
chr1	198528772	198531047	2	0	0	0	0	0	1	0	1	0	0	0	0
chr1	198446870	198449820	6	1	1	0	0	1	0	1	1	0	0	1	0
chr1	198440395	198444554	10	1	1	1	1	1	1	1	1	0	0	1	1
chr1	198386676	198387901	2	0	0	0	0	1	0	0	0	0	0	1	0
chr1	198287649	198289609	9	1	1	0	0	1	1	0	1	1	1	1	1
chr1	198274085	198279457	11	1	1	1	1	1	1	0	1	1	1	1	1
chr1	198268850	198269987	2	1	0	0	0	0	0	0	1	0	0	0	0
chr1	198258679	198262054	8	1	1	0	0	1	0	1	1	1	1	1	0
chr1	198253358	198256094	3	1	1	0	0	0	0	0	1	0	0	0	0
chr1	198203677	198205735	7	0	1	0	0	1	0	1	1	1	0	1	1
chr1	198180495	198182399	2	0	1	0	0	0	0	0	1	0	0	0	0
chr1	198174223	198176053	3	1	0	0	0	1	1	0	0	0	0	0	0
chr1	198167572	198168295	1	0	0	0	0	0	0	1	0	0	0	0	0
chr1	198152246	198154863	7	1	0	1	1	1	1	0	0	0	1	0	1
chr1	198141751	198142217	4	1	1	0	0	1	0	0	0	1	0	0	0
chr1	198121830	198124061	6	1	1	1	0	1	0	0	1	1	0	0	0
chr1	198110244	198113672	12	1	1	1	1	1	1	1	1	1	1	1	1
chr1	198101747	198103438	11	1	1	1	1	1	1	0	1	1	1	1	1
chr1	198029956	198032563	12	1	1	1	1	1	1	1	1	1	1	1	1
chr1	197985568	197987345	3	0	0	0	0	0	0	0	1	1	1	0	0
chr1	197957697	197959337	10	1	1	0	1	1	1	0	1	1	1	1	1
chr1	197932403	197934640	1	0	0	0	0	0	0	0	0	0	1	0	0
chr1	197920748	197929866	8	0	1	0	1	1	1	1	1	1	0	1	0
chr1	197909093	197914687	10	1	1	1	1	1	0	1	1	1	0	1	1
chr1	197904729	197906167	1	0	0	0	0	0	0	0	0	0	1	0	0
chr1	197896901	197899088	12	1	1	1	1	1	1	1	1	1	1	1	1
chr1	197890845	197891058	1	0	0	0	0	0	1	0	0	0	0	0	0
chr1	197814022	197816711	12	1	1	1	1	1	1	1	1	1	1	1	1
chr1	197810196	197810495	3	1	0	0	0	0	0	0	1	0	0	1	0
chr1	197781205	197783759	6	1	1	0	0	0	0	1	1	1	0	1	0
chr1	197770181	197772476	9	1	1	0	1	1	0	1	1	0	1	1	1
chr1	197754864	197757244	12	1	1	1	1	1	1	1	1	1	1	1	1
chr2	159055883	159056975	12	1	1	1	1	1	1	1	1	1	1	1	1
chr1	197663378	197667938	7	1	1	0	0	1	0	1	1	1	0	1	0
chr1	197615840	197617418	8	1	1	1	1	1	0	0	1	1	0	1	0
chr1	197604211	197605826	2	0	0	0	0	0	0	0	1	0	1	0	0
chr1	197551136	197552635	4	0	1	0	0	0	0	0	1	1	0	1	0
chr1	197519382	197520347	1	0	0	0	0	0	0	0	1	0	0	0	0
chr1	197499797	197500601	5	0	1	0	0	1	0	0	1	1	0	1	0
chr1	197479454	197481872	10	1	1	1	0	1	0	1	1	1	1	1	1
chr1	197399626	197400301	3	0	0	0	0	1	0	0	1	1	0	0	0
chr8	71048381	71049408	4	1	1	1	0	1	0	0	0	0	0	0	0
chr8	71058186	71060851	5	1	1	1	0	1	0	0	1	0	0	0	0
chr8	71068103	71070231	8	1	1	0	1	1	1	0	0	0	1	1	1
chr1	196658194	196661299	4	1	1	0	0	0	0	0	1	1	0	0	0
chr1	196650954	196652994	1	0	0	0	0	0	0	0	1	0	0	0	0
chr1	196583066	196585696	1	1	0	0	0	0	0	0	0	0	0	0	0
chr1	196448648	196448951	2	0	0	0	0	1	0	0	0	0	0	1	0
chr1	196444108	196445181	12	1	1	1	1	1	1	1	1	1	1	1	1
chr1	196361936	196363133	1	0	0	0	0	0	0	0	0	0	0	1	0
chr1	196359777	196361613	4	0	0	0	0	1	0	0	0	0	1	1	1
chr1	196317193	196319673	12	1	1	1	1	1	1	1	1	1	1	1	1
chr8	71179406	71182452	10	1	1	1	0	1	1	0	1	1	1	1	1
chr8	71191995	71192487	1	1	0	0	0	0	0	0	0	0	0	0	0
chr8	71223226	71225380	3	0	0	0	0	1	0	0	1	0	0	1	0
chr8	71242937	71244274	1	0	1	0	0	0	0	0	0	0	0	0	0
chr8	71302072	71303083	3	1	1	0	0	0	0	0	1	0	0	0	0
chr8	71313825	71315583	10	1	1	1	1	1	1	0	1	0	1	1	1
chr1	193997348	194000748	4	1	0	0	0	1	1	0	0	0	0	1	0
chr8	71349079	71350329	1	0	0	0	0	1	0	0	0	0	0	0	0
chr3	185417452	185418798	2	0	0	0	0	0	0	1	0	0	1	0	0
chr1	193524526	193529036	12	1	1	1	1	1	1	1	1	1	1	1	1
chr1	193372458	193373678	1	1	0	0	0	0	0	0	0	0	0	0	0
chr1	193347813	193349686	3	1	0	1	0	1	0	0	0	0	0	0	0
chr8	71426376	71429096	7	1	0	1	1	1	1	0	0	0	0	1	1
chr1	193183134	193183531	1	0	0	0	0	0	0	0	0	1	0	0	0
chr1	192916236	192918308	1	0	0	0	0	0	0	0	1	0	0	0	0
chr1	192840080	192841682	5	0	0	0	0	1	0	1	1	1	0	1	0
chr1	192787995	192788740	5	0	1	1	0	0	0	1	1	1	0	0	0
chr1	192700691	192702690	9	1	0	0	1	1	1	0	1	1	1	1	1
chr1	192654562	192656111	3	0	0	0	1	1	1	0	0	0	0	0	0
chr1	192645439	192646367	1	0	0	0	0	0	0	0	1	0	0	0	0
chr1	192643611	192644792	2	0	0	0	0	1	0	0	0	1	0	0	0
chr1	192629412	192630249	1	0	0	0	1	0	0	0	0	0	0	0	0
chr1	192619997	192620845	2	0	0	0	1	0	0	0	0	0	0	0	1
chr1	192583111	192585265	2	0	1	0	0	0	0	0	1	0	0	0	0
chr1	192538764	192540163	7	1	1	0	0	1	0	1	1	1	0	1	0
chr1	192516321	192518009	6	0	1	0	0	1	0	1	1	1	0	1	0
chr1	192452580	192453999	1	0	0	0	0	0	0	0	0	0	0	1	0
chr1	192445491	192447798	1	0	0	0	0	0	0	0	1	0	0	0	0
chr1	192379040	192380141	2	0	0	0	0	0	0	0	1	0	0	1	0
chr8	71516557	71518544	2	0	1	0	0	0	0	0	1	0	0	0	0
chr8	71532528	71532702	1	0	1	0	0	0	0	0	0	0	0	0	0
chr8	71540621	71541316	1	0	0	0	0	0	0	0	1	0	0	0	0
chr8	71553430	71555088	1	0	0	0	0	0	0	0	1	0	0	0	0
chr8	71560228	71563755	9	1	1	1	1	1	0	0	1	0	1	1	1
chr8	71710535	71712580	5	1	1	0	0	0	0	0	1	1	1	0	0
chr1	190477859	190479007	1	1	0	0	0	0	0	0	0	0	0	0	0
chr8	71795449	71796526	7	1	1	1	0	1	0	0	1	1	0	1	0
chr8	71804200	71805798	11	1	1	1	1	1	1	0	1	1	1	1	1
chr8	71906850	71912543	1	0	0	0	0	0	0	0	1	0	0	0	0
chr8	72074522	72076393	11	1	1	1	1	1	1	0	1	1	1	1	1
chr1	186984822	186986818	12	1	1	1	1	1	1	1	1	1	1	1	1
chr1	186983187	186984180	2	0	0	0	0	1	0	0	0	0	0	1	0
chr1	186974049	186976765	10	1	1	1	0	1	0	1	1	1	1	1	1
chr4	173331701	173331964	10	1	1	1	0	1	0	1	1	1	1	1	1
chr1	186967626	186968502	1	0	0	0	0	0	0	0	1	0	0	0	0
chr1	186955369	186958218	9	1	1	1	0	1	0	1	1	1	0	1	1
chr1	186934499	186937270	12	1	1	1	1	1	1	1	1	1	1	1	1
chr1	186658844	186659582	1	0	0	0	0	0	0	0	1	0	0	0	0
chr1	186617637	186619209	10	1	1	1	1	1	1	0	0	1	1	1	1
chr1	186563810	186564704	1	0	0	0	0	0	0	0	1	0	0	0	0
chr1	186498760	186499334	1	0	0	0	0	0	0	0	1	0	0	0	0
chr1	186494715	186496453	10	1	1	1	0	1	0	1	1	1	1	1	1
chr1	171761998	171762429	1	0	0	0	0	0	0	0	1	0	0	0	0
chr1	186482735	186483102	1	0	0	0	0	0	0	0	1	0	0	0	0
chr1	186289499	186290597	2	0	1	0	0	0	0	0	1	0	0	0	0
chr1	186286340	186287685	12	1	1	1	1	1	1	1	1	1	1	1	1
chr1	186280700	186283820	10	1	1	1	1	1	0	0	1	1	1	1	1
chr1	186239044	186240669	1	0	0	0	0	0	0	0	1	0	0	0	0
chr1	186212142	186221663	12	1	1	1	1	1	1	1	1	1	1	1	1
chr1	186207077	186209108	4	0	0	0	1	1	1	0	1	0	0	0	0
chr1	186186693	186188267	2	0	0	0	0	1	0	0	0	0	0	1	0
chr1	186182795	186184707	3	1	0	0	0	1	1	0	0	0	0	0	0
chr1	186178217	186179207	2	0	0	0	0	1	0	0	0	0	0	1	0
chr1	186155534	186155844	1	0	0	0	0	0	0	0	1	0	0	0	0
chr1	186152125	186153767	2	1	0	0	0	0	0	0	0	0	0	1	0
chr1	186128976	186130703	4	1	0	0	0	0	0	1	1	0	1	0	0
chr1	186112746	186114747	2	0	0	0	0	1	0	0	0	0	1	0	0
chr1	186059153	186063905	12	1	1	1	1	1	1	1	1	1	1	1	1
chr1	185994548	185996135	8	1	1	0	0	1	0	1	1	1	1	1	0
chr1	185983038	185984191	1	0	0	0	0	0	0	0	0	1	0	0	0
chr1	185970993	185972048	2	0	0	0	0	0	0	0	1	1	0	0	0
chr1	185963880	185966414	2	0	0	0	1	1	0	0	0	0	0	0	0
chr1	185946992	185960752	7	1	1	0	0	1	0	0	1	1	1	1	0
chr1	185909962	185913541	12	1	1	1	1	1	1	1	1	1	1	1	1
chr1	185902893	185903375	4	1	0	0	0	1	0	0	1	0	0	1	0
chr1	185894226	185896565	7	1	0	0	0	1	0	1	1	1	1	1	0
chr1	185856096	185857760	3	1	0	0	0	1	0	0	0	0	0	1	0
chr1	185819781	185821814	2	0	0	0	0	0	0	0	1	1	0	0	0
chr1	185812372	185814097	6	1	1	0	0	1	0	0	1	1	0	1	0
chr1	185800662	185802672	9	1	0	1	1	1	1	0	1	0	1	1	1
chr1	185755351	185756325	1	1	0	0	0	0	0	0	0	0	0	0	0
chr1	185716021	185722580	10	1	1	1	1	1	1	1	1	0	0	1	1
chr1	185628161	185636089	9	1	1	0	0	1	0	1	1	1	1	1	1
chr1	185593878	185596905	12	1	1	1	1	1	1	1	1	1	1	1	1
chr1	185573849	185574297	5	1	1	0	0	0	0	0	1	1	0	1	0
chr1	185566856	185571454	8	0	1	0	1	1	1	1	1	1	0	1	0
chr1	185549168	185549905	1	0	0	0	0	0	0	0	1	0	0	0	0
chr1	185486821	185488937	3	1	1	0	0	0	0	0	1	0	0	0	0
chr1	185479700	185481266	12	1	1	1	1	1	1	1	1	1	1	1	1
chr9	113060119	113061073	3	1	0	0	0	0	0	0	0	0	0	1	1
chr1	185469733	185469931	11	1	1	1	1	1	1	0	1	1	1	1	1
chr1	185469341	185469608	11	1	1	1	1	1	1	0	1	1	1	1	1
chr9	113060119	113060488	11	1	1	1	1	1	1	0	1	1	1	1	1
chr1	185472134	185472352	11	1	1	1	1	1	1	0	1	1	1	1	1
chr9	113060119	113060488	11	1	1	1	1	1	1	0	1	1	1	1	1
chr1	185469151	185470183	9	1	0	1	1	0	1	0	1	1	1	1	1
chr9	113060119	113060488	9	1	0	1	1	0	1	0	1	1	1	1	1
chr1	185437639	185439677	1	0	0	0	0	0	0	0	1	0	0	0	0
chr1	185425211	185427747	12	1	1	1	1	1	1	1	1	1	1	1	1
chr1	185415383	185416861	8	1	1	1	0	0	0	1	1	1	1	1	0
chr1	185404507	185407051	5	1	0	0	0	1	0	0	1	0	1	0	1
chr1	185399887	185401618	4	0	1	0	0	0	0	0	1	1	0	1	0
chr1	185396160	185398406	4	0	1	0	0	0	0	0	1	1	0	1	0
chr1	185369433	185374502	11	1	1	1	1	1	0	1	1	1	1	1	1
chr1	185175648	185175976	1	0	0	0	0	1	0	0	0	0	0	0	0
chr8	72440999	72441819	2	0	0	0	0	0	0	0	1	1	0	0	0
chr4	137425726	137425899	2	0	0	0	0	0	0	0	1	1	0	0	0
chr1	25901555	25901679	2	0	0	0	0	0	0	0	1	1	0	0	0
chr1	184981949	184983858	12	1	1	1	1	1	1	1	1	1	1	1	1
chr1	184972085	184976325	12	1	1	1	1	1	1	1	1	1	1	1	1
chr1	184966258	184967371	2	0	0	0	1	1	0	0	0	0	0	0	0
chr1	184958745	184960008	1	0	0	0	0	0	0	0	0	0	1	0	0
chr1	184918778	184920005	1	0	1	0	0	0	0	0	0	0	0	0	0
chr1	184906940	184908746	12	1	1	1	1	1	1	1	1	1	1	1	1
chr1	184851944	184853448	5	1	1	1	0	1	0	0	1	0	0	0	0
chr1	184844759	184845423	1	0	1	0	0	0	0	0	0	0	0	0	0
chr1	184824628	184839299	12	1	1	1	1	1	1	1	1	1	1	1	1
chr1	184805139	184806454	12	1	1	1	1	1	1	1	1	1	1	1	1
chr1	184790140	184793078	7	1	0	0	0	0	0	1	1	1	1	1	1
chr1	184749109	184750886	1	0	0	0	0	1	0	0	0	0	0	0	0
chr1	184713262	184713977	10	1	0	1	1	1	1	0	1	1	1	1	1
chr16	89907526	89908850	10	1	0	1	1	1	1	0	1	1	1	1	1
chr1	184633048	184637946	9	1	1	1	0	1	0	1	1	1	1	1	0
chr1	184603958	184605828	11	1	1	1	1	1	0	1	1	1	1	1	1
chr1	184572278	184572624	1	0	0	0	0	0	0	0	1	0	0	0	0
chr1	184502645	184503648	2	1	0	0	0	0	0	0	1	0	0	0	0
chr1	184486710	184488021	12	1	1	1	1	1	1	1	1	1	1	1	1
chr1	184472880	184475605	4	1	0	0	1	1	0	0	0	0	0	1	0
chr1	184457593	184460421	9	1	0	0	1	1	1	0	1	1	1	1	1
chr1	184441583	184445249	12	1	1	1	1	1	1	1	1	1	1	1	1
chr1	184440844	184441235	2	0	1	0	0	0	0	0	1	0	0	0	0
chr1	184438222	184439444	1	0	0	0	0	0	0	0	1	0	0	0	0
chr1	184428358	184437628	1	0	0	0	0	0	0	0	1	0	0	0	0
chr1	184414903	184415707	1	0	0	0	0	0	0	0	1	0	0	0	0
chr1	184407372	184408661	5	1	0	0	0	1	0	1	1	0	1	0	0
chr1	184389540	184394557	12	1	1	1	1	1	1	1	1	1	1	1	1
chr1	184228659	184228973	2	1	0	0	0	0	0	0	1	0	0	0	0
chr1	184157818	184159303	3	0	0	0	1	0	0	0	0	0	1	1	0
chr1	184152297	184154239	1	0	0	0	0	0	0	0	1	0	0	0	0
chr1	184098474	184103249	10	1	1	1	0	1	0	1	1	1	1	1	1
chr1	184074518	184079533	11	1	1	0	1	1	1	1	1	1	1	1	1
chr1	184035614	184038126	12	1	1	1	1	1	1	1	1	1	1	1	1
chr1	184030180	184031016	9	1	0	0	1	1	1	1	1	1	1	1	0
chr3	101456956	101457844	9	1	0	0	1	1	1	1	1	1	1	1	0
chr1	184001847	184003523	11	1	1	1	0	1	1	1	1	1	1	1	1
chr1	183984913	183985825	1	0	0	0	1	0	0	0	0	0	0	0	0
chr1	183952322	183954168	9	1	1	0	0	1	1	1	1	1	1	1	0
chr1	183928535	183933774	7	1	1	1	1	1	1	0	1	0	0	0	0
chr1	183915337	183918150	12	1	1	1	1	1	1	1	1	1	1	1	1
chr1	183885822	183889242	12	1	1	1	1	1	1	1	1	1	1	1	1
chr1	183882627	183884693	10	1	1	1	0	1	0	1	1	1	1	1	1
chr1	183850526	183856250	10	1	1	1	1	1	1	1	1	0	1	1	0
chr1	183820377	183823232	6	1	0	0	1	1	1	0	0	0	1	1	0
chr1	183710868	183712673	1	0	0	0	0	0	0	0	1	0	0	0	0
chr1	183688341	183691226	1	0	0	0	0	1	0	0	0	0	0	0	0
chr1	183655082	183655945	1	0	0	0	0	0	0	1	0	0	0	0	0
chr1	183633458	183634111	1	0	0	1	0	0	0	0	0	0	0	0	0
chr1	183622443	183623687	3	1	0	0	1	0	0	0	1	0	0	0	0
chr1	183604010	183606241	7	0	0	0	1	1	1	1	1	0	1	0	1
chr1	183601881	183603915	7	0	1	0	0	1	0	1	1	1	0	1	1
chr1	183576430	183578204	1	0	0	0	0	0	0	0	1	0	0	0	0
chr1	183416073	183419005	12	1	1	1	1	1	1	1	1	1	1	1	1
chr1	183353468	183356490	3	1	1	0	0	0	0	0	1	0	0	0	0
chr1	183330353	183331590	1	0	0	0	1	0	0	0	0	0	0	0	0
chr1	183318262	183319016	2	0	0	0	0	0	0	0	1	0	0	0	1
chr1	183310629	183313301	12	1	1	1	1	1	1	1	1	1	1	1	1
chr1	183293838	183295000	2	0	0	0	0	1	1	0	0	0	0	0	0
chr1	183278013	183283891	12	1	1	1	1	1	1	1	1	1	1	1	1
chr1	183275961	183277775	9	1	0	0	1	1	1	0	1	1	1	1	1
chr1	183268418	183271413	11	1	1	1	1	1	1	1	1	1	1	1	0
chr1	183245574	183247949	1	0	0	0	0	0	0	0	1	0	0	0	0
chr1	183239759	183241923	12	1	1	1	1	1	1	1	1	1	1	1	1
chr1	183236788	183239190	10	1	1	1	0	1	0	1	1	1	1	1	1
chr1	183234240	183235811	9	1	1	1	0	1	0	1	1	1	1	1	0
chr22	42776650	42777248	9	1	1	1	0	1	0	1	1	1	1	1	0
chr1	183228233	183231228	12	1	1	1	1	1	1	1	1	1	1	1	1
chr1	183218140	183219290	3	1	1	0	0	0	0	0	1	0	0	0	0
chr1	183200442	183201204	3	1	1	0	0	0	0	0	1	0	0	0	0
chr1	183198539	183198853	2	0	0	0	0	0	0	1	1	0	0	0	0
chr1	183184562	183187670	12	1	1	1	1	1	1	1	1	1	1	1	1
chr1	183094684	183101231	2	0	0	0	0	1	1	0	0	0	0	0	0
chr1	183073734	183077033	5	1	1	0	0	1	0	0	0	1	1	0	0
chr1	183066989	183068643	12	1	1	1	1	1	1	1	1	1	1	1	1
chr1	183059289	183061565	8	1	1	1	0	1	0	1	1	1	1	0	0
chr1	183046030	183053128	1	0	0	0	0	1	0	0	0	0	0	0	0
chr1	182962269	182963136	12	1	1	1	1	1	1	1	1	1	1	1	1
chr1	182962269	182963240	12	1	1	1	1	1	1	1	1	1	1	1	1
chr1	182852089	182852634	1	1	0	0	0	0	0	0	0	0	0	0	0
chr1	182788891	182791010	12	1	1	1	1	1	1	1	1	1	1	1	1
chr1	182781240	182785595	8	0	1	0	1	1	1	0	1	1	0	1	1
chr1	182767284	182769630	4	0	0	0	0	1	0	0	0	0	1	1	1
chr1	182754563	182758086	11	1	1	1	1	1	1	0	1	1	1	1	1
chr1	182705810	182709020	11	1	1	1	1	1	0	1	1	1	1	1	1
chr1	182656807	182659907	11	1	1	1	1	1	1	1	1	0	1	1	1
chr1	182638389	182643565	10	1	1	1	1	1	1	0	1	1	1	1	0
chr1	182611437	182612736	2	1	0	0	0	0	0	0	1	0	0	0	0
chr1	182606517	182609557	1	0	0	0	0	0	1	0	0	0	0	0	0
chr1	182594877	182600571	11	1	1	1	1	1	1	1	1	0	1	1	1
chr1	182588229	182589409	2	0	0	0	0	0	0	0	0	0	1	1	0
chr1	182339620	182340943	3	0	0	0	0	1	1	0	0	0	0	1	0
chr1	182301347	182302216	2	0	1	0	0	0	0	0	1	0	0	0	0
chr1	182292860	182293385	1	0	0	0	0	0	0	0	1	0	0	0	0
chr1	182236903	182238079	1	0	0	0	0	0	0	0	1	0	0	0	0
chr1	182147145	182147550	1	0	0	0	0	0	0	0	1	0	0	0	0
chr1	182142781	182144757	9	1	1	1	1	1	1	0	1	0	1	1	0
chr1	182120080	182122366	9	1	1	1	0	1	0	1	1	1	0	1	1
chr1	182081980	182087228	12	1	1	1	1	1	1	1	1	1	1	1	1
chr1	182069022	182069553	12	1	1	1	1	1	1	1	1	1	1	1	1
chr1	182055053	182064416	12	1	1	1	1	1	1	1	1	1	1	1	1
chr1	181983485	181984939	6	1	0	1	0	1	0	1	1	0	0	1	0
chr1	181918596	181924695	3	1	0	0	0	0	0	0	1	0	0	1	0
chr1	181742916	181744881	5	1	1	1	0	0	0	0	1	1	0	0	0
chr1	181580190	181582418	6	1	1	1	1	1	1	0	0	0	0	0	0
chr1	181504155	181508572	2	0	0	0	0	1	1	0	0	0	0	0	0
chr1	181480919	181484263	11	0	1	1	1	1	1	1	1	1	1	1	1
chr1	181418945	181424509	12	1	1	1	1	1	1	1	1	1	1	1	1
chr1	181368847	181375404	1	0	0	0	0	0	1	0	0	0	0	0	0
chr1	181315086	181319255	12	1	1	1	1	1	1	1	1	1	1	1	1
chr1	181184493	181187298	2	0	1	0	0	0	0	0	1	0	0	0	0
chr1	181151549	181153427	11	1	1	1	1	1	0	1	1	1	1	1	1
chr1	181139218	181141963	1	0	0	0	0	0	0	0	0	1	0	0	0
chr1	181135147	181139066	4	1	0	1	1	0	1	0	0	0	0	0	0
chr1	181127546	181133397	12	1	1	1	1	1	1	1	1	1	1	1	1
chr1	181111462	181117141	10	1	1	1	0	1	0	1	1	1	1	1	1
chr1	181092294	181103468	12	1	1	1	1	1	1	1	1	1	1	1	1
chr1	181076440	181080680	5	1	1	0	0	0	0	1	1	1	0	0	0
chr1	181062269	181063252	3	0	1	0	0	0	0	0	1	0	1	0	0
chr1	181039186	181040626	4	1	1	1	0	0	0	0	1	0	0	0	0
chr1	181033104	181036159	12	1	1	1	1	1	1	1	1	1	1	1	1
chr1	180960929	180977615	9	1	1	0	0	1	1	1	1	0	1	1	1
chr1	180944287	180956890	10	1	1	1	1	0	0	1	1	1	1	1	1
chr1	180945431	180945497	10	1	1	1	1	0	0	1	1	1	1	1	1
chr1	180929329	180933976	8	1	1	0	1	1	1	0	1	0	1	1	0
chr1	180737811	180738049	1	0	0	0	0	0	0	0	1	0	0	0	0
chr1	180584825	180585928	6	0	0	0	0	0	1	1	1	0	1	1	1
chr1	180572778	180575833	6	1	0	1	1	1	1	0	0	0	1	0	0
chr1	180564814	180566452	1	0	0	0	0	0	0	0	0	0	0	1	0
chr1	180545083	180549397	12	1	1	1	1	1	1	1	1	1	1	1	1
chr1	180539699	180541355	5	1	1	1	0	1	0	0	1	0	0	0	0
chr1	180526177	180529253	9	1	1	1	1	1	1	1	1	1	0	0	0
chr1	180523196	180526161	8	1	1	0	0	1	0	1	1	1	1	0	1
chr1	180520833	180522785	9	1	1	1	0	1	0	1	1	1	1	1	0
chr1	180477817	180483374	5	1	0	1	0	1	1	0	1	0	0	0	0
chr1	180282235	180284243	1	0	0	0	0	0	1	0	0	0	0	0	0
chr1	180276639	180279420	8	0	1	1	1	1	1	0	0	0	1	1	1
chr1	180251244	180252364	2	0	0	0	0	1	1	0	0	0	0	0	0
chr1	180228473	180237482	12	1	1	1	1	1	1	1	1	1	1	1	1
chr1	180184664	180189192	8	1	1	1	0	1	0	1	1	0	0	1	1
chr1	180178031	180179371	3	0	1	1	0	0	0	0	1	0	0	0	0
chr1	180165726	180166633	1	0	1	0	0	0	0	0	0	0	0	0	0
chr1	180156305	180158007	1	0	0	0	1	0	0	0	0	0	0	0	0
chr1	180114725	180117381	3	1	1	0	0	0	0	0	1	0	0	0	0
chr1	179873600	179875869	2	0	0	1	0	0	1	0	0	0	0	0	0
chr1	179809846	179810135	1	0	0	0	0	0	0	0	0	0	0	1	0
chr1	179784631	179786265	10	1	1	1	1	1	1	0	1	0	1	1	1
chr1	179764129	179767821	10	1	1	1	1	1	1	1	1	0	0	1	1
chr1	179731854	179732432	1	1	0	0	0	0	0	0	0	0	0	0	0
chr1	179709718	179710612	8	1	1	0	1	1	1	0	1	0	1	1	0
chr7	139323977	139324275	8	1	1	0	1	1	1	0	1	0	1	1	0
chr1	179705746	179707069	11	1	1	1	1	1	1	1	1	0	1	1	1
chr1	179661603	179663280	6	1	1	1	1	1	0	0	1	0	0	0	0
chr1	179575101	179577110	11	1	1	0	1	1	1	1	1	1	1	1	1
chr1	179508947	179510600	5	1	1	1	0	1	0	0	1	0	0	0	0
chr6	34263302	34263626	1	0	0	0	0	0	0	1	0	0	0	0	0
chr1	179337005	179337725	1	0	0	0	0	0	0	0	1	0	0	0	0
chr1	179331442	179333056	5	1	1	0	0	0	0	1	1	0	1	0	0
chr1	179303511	179304162	1	0	0	0	0	0	0	0	1	0	0	0	0
chr1	179178887	179179371	2	0	1	0	0	0	0	0	1	0	0	0	0
chr1	179141302	179143676	9	1	1	0	1	0	1	1	1	1	1	1	0
chr1	179117710	179118989	1	0	0	0	0	0	0	0	0	1	0	0	0
chr1	179103291	179110578	4	0	0	0	0	1	0	0	1	1	1	0	0
chr1	179090723	179097013	8	1	1	0	0	1	1	0	1	1	0	1	1
chr1	179085452	179088160	11	1	1	1	1	1	0	1	1	1	1	1	1
chr1	179031499	179036879	11	1	1	0	1	1	1	1	1	1	1	1	1
chr1	179016688	179018319	12	1	1	1	1	1	1	1	1	1	1	1	1
chr1	179001393	179003840	10	1	1	1	0	1	1	1	1	1	1	1	0
chr1	178973140	178974617	10	1	1	1	1	1	1	1	1	0	0	1	1
chr1	178960306	178961819	12	1	1	1	1	1	1	1	1	1	1	1	1
chr1	178949956	178954273	12	1	1	1	1	1	1	1	1	1	1	1	1
chr1	178944259	178946181	1	0	0	0	1	0	0	0	0	0	0	0	0
chr1	178933835	178935938	12	1	1	1	1	1	1	1	1	1	1	1	1
chr1	178916050	178918010	5	1	0	0	0	1	0	1	1	0	0	1	0
chr1	178865889	178872606	12	1	1	1	1	1	1	1	1	1	1	1	1
chr1	178857109	178857563	1	1	0	0	0	0	0	0	0	0	0	0	0
chr1	178689709	178691142	3	0	0	0	1	1	1	0	0	0	0	0	0
chr1	178648935	178652259	10	1	1	1	1	1	1	0	1	0	1	1	1
chr1	178645517	178648028	7	1	1	1	0	1	0	0	1	0	1	1	0
chr1	178642356	178643910	1	0	0	0	0	1	0	0	0	0	0	0	0
chr1	178580136	178585203	9	1	1	1	1	1	1	0	1	0	1	1	0
chr1	178535754	178545749	12	1	1	1	1	1	1	1	1	1	1	1	1
chr1	178531520	178534685	12	1	1	1	1	1	1	1	1	1	1	1	1
chr1	178518350	178521989	8	1	1	1	0	0	1	1	1	0	0	1	1
chr1	178475308	178477601	12	1	1	1	1	1	1	1	1	1	1	1	1
chr8	72945435	72946508	2	1	0	0	0	0	0	0	1	0	0	0	0
chr1	178386981	178389291	10	1	1	1	1	1	0	0	1	1	1	1	1
chr1	178346821	178347613	6	1	1	0	0	1	1	0	1	0	0	1	0
chr1	178341142	178342102	1	0	0	1	0	0	0	0	0	0	0	0	0
chr1	178192521	178193287	4	0	1	1	0	1	0	0	1	0	0	0	0
chr1	178146281	178146921	1	0	1	0	0	0	0	0	0	0	0	0	0
chr1	178126301	178127760	12	1	1	1	1	1	1	1	1	1	1	1	1
chr1	178050385	178053312	6	1	1	1	0	1	0	0	1	1	0	0	0
chr1	178036698	178039239	8	1	1	0	0	1	1	1	1	0	1	1	0
chr1	178011504	178012704	1	0	0	0	0	0	0	0	1	0	0	0	0
chr1	177998488	178001524	2	1	0	1	0	0	0	0	0	0	0	0	0
chr1	177975877	177978319	12	1	1	1	1	1	1	1	1	1	1	1	1
chr1	177958661	177961699	6	1	1	1	0	1	0	0	1	0	1	0	0
chr1	177936585	177939044	1	0	0	0	0	0	0	0	1	0	0	0	0
chr1	177874885	177875669	1	0	0	0	0	0	0	0	1	0	0	0	0
chr1	177852614	177853739	2	1	0	0	0	0	0	0	0	1	0	0	0
chr1	177710140	177711516	1	0	0	0	0	1	0	0	0	0	0	0	0
chr8	72994838	72995257	1	0	0	0	0	0	0	0	1	0	0	0	0
chr8	72996952	72999814	5	1	1	1	0	1	1	0	0	0	0	0	0
chr1	177346669	177347382	6	1	1	1	0	1	1	0	1	0	0	0	0
chr1	177334752	177335540	1	0	0	0	0	0	0	0	1	0	0	0	0
chr1	177314728	177316671	12	1	1	1	1	1	1	1	1	1	1	1	1
chr1	177276950	177279858	3	0	1	0	0	0	0	0	1	1	0	0	0
chr1	177272183	177272766	1	0	0	0	0	0	0	0	1	0	0	0	0
chr1	177239205	177242372	1	1	0	0	0	0	0	0	0	0	0	0	0
chr1	177209286	177210010	1	0	0	0	0	0	0	0	1	0	0	0	0
chr1	177163336	177165184	12	1	1	1	1	1	1	1	1	1	1	1	1
chr8	73066936	73069102	11	1	1	1	1	1	1	0	1	1	1	1	1
chr1	176947193	176950751	12	1	1	1	1	1	1	1	1	1	1	1	1
chr1	176939406	176940861	4	1	1	0	0	0	0	0	1	0	0	1	0
chr1	176896435	176898641	1	0	0	0	0	1	0	0	0	0	0	0	0
chr1	176880117	176881879	10	1	1	1	1	1	1	0	1	1	1	1	0
chr1	176808631	176809886	1	1	0	0	0	0	0	0	0	0	0	0	0
chr8	73075319	73079334	5	0	0	0	1	1	1	0	0	0	0	1	1
chr1	176735338	176739432	11	1	1	1	1	1	1	0	1	1	1	1	1
chr8	73079456	73081527	5	0	0	0	0	0	1	0	1	1	1	1	0
chr1	176692686	176694435	5	0	1	0	0	1	0	0	1	1	0	1	0
chr1	176682657	176683635	3	0	0	0	1	1	1	0	0	0	0	0	0
chr1	176642832	176644205	4	0	0	0	0	1	0	0	1	0	0	1	1
chr1	176622986	176624314	2	0	0	0	0	0	0	0	1	0	0	1	0
chr1	176564169	176567659	8	1	1	1	0	1	0	1	1	1	0	1	0
chr1	176550940	176554470	6	1	1	0	0	1	0	0	1	1	0	1	0
chr8	73099913	73100779	7	1	0	0	1	1	1	0	0	0	1	1	1
chr4	83272093	83273616	7	1	0	0	1	1	1	0	0	0	1	1	1
chr4	83278946	83279112	7	1	0	0	1	1	1	0	0	0	1	1	1
chr1	176479663	176481523	7	1	1	0	0	0	0	1	1	1	1	1	0
chr8	73106352	73108124	9	1	1	1	1	1	1	1	1	0	0	1	0
chr1	175887525	175888285	3	0	0	0	0	0	1	1	1	0	0	0	0
chr1	175884377	175886554	12	1	1	1	1	1	1	1	1	1	1	1	1
chr1	175878817	175880643	8	1	1	1	1	1	0	0	1	1	1	0	0
chr1	175700016	175701955	4	1	1	1	0	0	0	0	1	0	0	0	0
chr1	175599463	175604991	12	1	1	1	1	1	1	1	1	1	1	1	1
chr1	175567594	175568042	1	1	0	0	0	0	0	0	0	0	0	0	0
chr1	175527400	175528610	7	1	1	1	0	1	1	0	0	0	0	1	1
chr1	175502400	175504175	12	1	1	1	1	1	1	1	1	1	1	1	1
chr8	73155351	73156436	2	0	0	0	0	0	1	0	0	0	0	1	0
chr1	175484673	175485990	2	0	1	1	0	0	0	0	0	0	0	0	0
chr1	175447476	175450033	9	1	1	0	1	1	1	0	1	0	1	1	1
chr8	73164587	73165267	3	0	0	0	0	1	1	0	1	0	0	0	0
chr1	175392309	175394064	2	0	1	1	0	0	0	0	0	0	0	0	0
chr1	175360152	175363621	9	1	1	0	1	1	0	0	1	1	1	1	1
chr8	73173417	73175639	12	1	1	1	1	1	1	1	1	1	1	1	1
chr1	175196651	175199863	6	0	0	0	0	1	0	1	1	0	1	1	1
chr1	175189231	175191009	1	0	0	0	0	0	0	0	0	0	0	1	0
chr1	175185703	175187750	2	0	1	0	0	0	0	0	1	0	0	0	0
chr1	175180885	175183743	2	0	0	0	0	0	0	0	1	1	0	0	0
chr1	175173732	175177849	12	1	1	1	1	1	1	1	1	1	1	1	1
chr1	175132475	175133101	1	0	0	0	0	0	0	0	1	0	0	0	0
chr1	175088872	175089324	1	0	0	0	0	1	0	0	0	0	0	0	0
chr1	175033833	175036211	6	1	0	0	0	1	1	0	1	1	0	0	1
chr1	174963443	174966503	5	1	1	0	0	0	0	1	1	1	0	0	0
chr1	174952921	174955374	9	1	1	1	0	1	0	1	1	1	1	1	0
chr1	174875258	174876495	3	0	0	0	0	0	0	0	1	1	0	1	0
chr1	174854208	174855731	3	0	0	0	0	1	0	0	0	1	0	1	0
chr1	174769865	174770940	4	1	0	0	0	1	1	0	1	0	0	0	0
chr1	174739259	174739431	1	0	0	0	0	0	0	0	1	0	0	0	0
chr22	21449719	21450875	1	0	0	0	0	0	0	0	1	0	0	0	0
chr1	174564470	174565215	2	0	1	0	0	0	0	0	1	0	0	0	0
chr1	174550087	174550641	5	1	0	1	0	1	0	0	1	0	0	1	0
chr1	174535237	174535719	10	1	1	1	1	1	0	0	1	1	1	1	1
chr20	20525887	20525999	10	1	1	1	1	1	0	0	1	1	1	1	1
chr1	174497400	174497987	5	1	0	1	0	1	1	0	0	0	0	1	0
chr1	174451123	174452866	3	0	0	0	0	1	0	0	1	0	0	0	1
chr1	174391104	174392110	6	1	1	0	1	1	1	0	0	0	0	1	0
chr13	83037027	83037203	6	1	1	0	1	1	1	0	0	0	0	1	0
chr1	174245934	174249041	2	0	0	0	0	1	0	0	0	0	1	0	0
chr1	174228956	174239972	4	0	1	0	0	1	0	0	1	0	0	1	0
chr13	111310000	111310675	2	0	0	0	1	0	0	0	0	0	0	0	1
chr1	174025543	174026360	1	0	0	0	0	0	0	0	1	0	0	0	0
chr1	173983390	173983896	1	0	0	0	0	0	0	0	1	0	0	0	0
chr1	173877864	173878380	12	1	1	1	1	1	1	1	1	1	1	1	1
chr1	173856839	173858429	1	0	0	0	0	0	0	0	0	0	1	0	0
chr8	73299208	73304307	3	1	0	1	0	0	0	0	0	1	0	0	0
chr8	73316317	73319823	2	0	0	0	0	0	0	0	1	0	0	1	0
chr1	173430714	173437918	11	1	1	1	1	1	0	1	1	1	1	1	1
chr1	173420170	173420606	1	0	0	0	0	0	0	0	1	0	0	0	0
chr1	173243549	173245155	4	1	1	0	0	0	0	0	1	1	0	0	0
chr6	41098489	41098875	4	1	1	0	0	0	0	0	1	1	0	0	0
chr1	173209120	173211410	1	0	0	0	0	0	0	0	1	0	0	0	0
chr1	173206723	173208138	2	1	0	0	0	0	0	0	1	0	0	0	0
chr1	173189537	173190957	1	0	1	0	0	0	0	0	0	0	0	0	0
chr1	173137015	173137303	9	1	1	1	1	1	0	1	1	1	0	1	0
chr1	173050583	173051418	1	0	1	0	0	0	0	0	0	0	0	0	0
chr1	173029932	173039441	3	0	1	0	0	1	0	0	1	0	0	0	0
chr1	172932802	172934674	8	1	1	1	0	1	0	0	1	1	1	1	0
chr1	172917671	172918337	1	0	0	0	0	0	0	0	1	0	0	0	0
chr1	172823655	172826789	12	1	1	1	1	1	1	1	1	1	1	1	1
chr1	172763946	172765578	11	1	1	1	1	1	1	0	1	1	1	1	1
chr8	73356230	73357678	3	0	1	1	0	0	0	0	1	0	0	0	0
chr1	150265702	150269014	7	1	0	0	1	1	1	0	0	0	1	1	1
chr1	172742647	172747587	12	1	1	1	1	1	1	1	1	1	1	1	1
chr1	172717625	172720183	1	0	0	0	0	0	0	0	1	0	0	0	0
chr1	172698186	172700139	1	0	0	0	0	0	0	0	1	0	0	0	0
chr8	73362422	73363087	2	0	1	0	0	0	0	0	1	0	0	0	0
chr1	172497828	172498552	12	1	1	1	1	1	1	1	1	1	1	1	1
chr1	172498754	172500944	12	1	1	1	1	1	1	1	1	1	1	1	1
chr1	172448902	172451264	7	1	1	1	0	1	0	1	1	1	0	0	0
chr1	172420899	172429898	10	1	1	1	0	1	0	1	1	1	1	1	1
chr1	172418969	172420243	9	1	1	1	1	1	0	0	1	1	1	0	1
chr1	172414604	172418130	7	1	0	0	0	1	1	1	1	1	1	0	0
chr1	172388663	172396786	12	1	1	1	1	1	1	1	1	1	1	1	1
chr1	172379655	172385225	12	1	1	1	1	1	1	1	1	1	1	1	1
chr1	172356882	172362106	12	1	1	1	1	1	1	1	1	1	1	1	1
chr1	172342737	172344892	4	1	1	0	0	1	1	0	0	0	0	0	0
chr1	172313575	172325957	12	1	1	1	1	1	1	1	1	1	1	1	1
chr1	172292968	172295198	1	0	0	1	0	0	0	0	0	0	0	0	0
chr1	172284680	172287503	4	0	0	0	1	1	1	0	0	0	0	1	0
chr1	172277927	172279106	3	0	1	0	0	0	0	0	1	1	0	0	0
chr8	73404716	73406486	11	1	1	0	1	1	1	1	1	1	1	1	1
chr1	172268352	172271382	10	1	1	1	1	1	0	1	1	1	1	1	0
chr1	172264077	172266513	10	1	1	1	0	1	1	1	1	1	1	1	0
chr1	172252074	172255983	4	1	0	0	0	1	0	0	1	0	1	0	0
chr1	172223630	172224966	2	0	0	0	0	1	1	0	0	0	0	0	0
chr1	172185033	172186178	1	1	0	0	0	0	0	0	0	0	0	0	0
chr1	172179617	172183185	12	1	1	1	1	1	1	1	1	1	1	1	1
chr1	172153073	172155421	12	1	1	1	1	1	1	1	1	1	1	1	1
chr1	172148179	172149927	12	1	1	1	1	1	1	1	1	1	1	1	1
chr1	172135362	172147954	12	1	1	1	1	1	1	1	1	1	1	1	1
chr8	73418572	73423626	12	1	1	1	1	1	1	1	1	1	1	1	1
chr1	172069617	172070375	2	0	0	1	0	0	1	0	0	0	0	0	0
chr1	172054008	172064863	12	1	1	1	1	1	1	1	1	1	1	1	1
chr1	172049730	172051937	6	1	0	1	1	1	1	0	0	0	0	0	1
chr1	172023518	172033594	3	0	0	0	0	1	1	0	0	0	1	0	0
chr1	172002656	172003269	3	0	1	0	0	1	0	0	0	1	0	0	0
chr1	172002416	172002600	7	0	1	0	0	1	1	0	1	1	0	1	1
chr8	73437152	73441028	10	1	1	1	1	1	1	0	1	0	1	1	1
chr1	171877535	171878747	5	0	1	1	0	0	0	1	1	1	0	0	0
chr1	171868021	171869825	11	1	1	1	1	1	0	1	1	1	1	1	1
chr8	73450666	73452929	10	1	1	1	1	1	1	0	1	0	1	1	1
chr1	171645572	171646235	1	1	0	0	0	0	0	0	0	0	0	0	0
chr1	171634928	171636382	2	0	0	0	0	0	0	0	1	1	0	0	0
chr8	73470601	73474625	12	1	1	1	1	1	1	1	1	1	1	1	1
chr8	73480593	73481326	1	0	0	0	0	0	1	0	0	0	0	0	0
chr1	171471037	171472173	1	0	0	0	0	0	0	0	1	0	0	0	0
chr1	171212457	171234189	1	0	0	0	0	0	1	0	0	0	0	0	0
chr1	171188191	171189183	1	0	0	0	0	1	0	0	0	0	0	0	0
chr1	171181493	171183427	3	0	0	0	1	1	1	0	0	0	0	0	0
chr8	73489261	73491534	2	0	0	0	0	1	0	0	1	0	0	0	0
chr1	171137140	171137832	12	1	1	1	1	1	1	1	1	1	1	1	1
chr1	170966991	170967483	1	0	0	0	0	0	0	0	1	0	0	0	0
chr8	73516241	73518703	3	1	0	1	0	0	0	0	1	0	0	0	0
chr1	170891973	170894393	5	1	0	0	1	1	1	0	0	0	1	0	0
chr1	170888318	170888997	1	0	0	0	0	1	0	0	0	0	0	0	0
chr1	170879671	170881558	9	1	0	0	0	1	1	1	1	1	1	1	1
chr1	170826033	170827048	3	0	1	0	0	0	0	0	1	1	0	0	0
chr1	170713857	170715319	3	0	0	0	0	0	0	0	1	0	1	1	0
chr1	170705037	170708429	1	0	0	0	0	0	0	0	1	0	0	0	0
chr1	170690521	170700235	12	1	1	1	1	1	1	1	1	1	1	1	1
chr1	170683803	170686105	1	0	0	0	0	1	0	0	0	0	0	0	0
chr1	170675860	170678690	7	0	0	0	1	1	1	0	1	0	1	1	1
chr1	170667958	170669968	1	0	0	0	0	0	0	0	0	0	0	0	1
chr1	170590105	170593782	2	0	0	0	0	1	0	0	1	0	0	0	0
chr1	170586512	170588869	10	1	1	1	1	1	1	0	1	0	1	1	1
chr1	170536631	170538008	3	0	0	0	1	1	1	0	0	0	0	0	0
chr1	170513920	170521617	12	1	1	1	1	1	1	1	1	1	1	1	1
chr1	170509868	170512521	12	1	1	1	1	1	1	1	1	1	1	1	1
chr1	170459524	170461168	4	0	1	1	0	1	0	0	1	0	0	0	0
chr1	170353784	170354574	2	0	0	0	0	0	0	0	1	1	0	0	0
chr1	170306581	170310876	12	1	1	1	1	1	1	1	1	1	1	1	1
chr1	170284215	170285660	12	1	1	1	1	1	1	1	1	1	1	1	1
chr1	170247843	170248661	1	0	0	0	1	0	0	0	0	0	0	0	0
chr1	170225141	170227780	9	1	0	1	1	1	1	0	1	0	1	1	1
chr1	170213362	170215465	7	1	1	1	1	1	1	0	1	0	0	0	0
chr1	170149022	170150589	1	0	0	0	0	1	0	0	0	0	0	0	0
chr1	170133496	170135363	2	1	0	1	0	0	0	0	0	0	0	0	0
chr1	170096481	170099310	12	1	1	1	1	1	1	1	1	1	1	1	1
chr1	170085792	170086859	7	1	1	1	1	1	0	0	0	1	1	0	0
chr1	169994810	170000594	8	1	0	0	1	1	1	0	1	0	1	1	1
chr1	169987267	169988639	3	0	0	0	1	0	1	0	0	0	1	0	0
chr1	169941323	169950799	9	1	1	1	1	1	1	0	1	0	1	1	0
chr1	169929071	169933425	12	1	1	1	1	1	1	1	1	1	1	1	1
chr8	73619564	73621770	3	0	0	0	1	1	1	0	0	0	0	0	0
chr1	169732618	169734496	3	1	1	1	0	0	0	0	0	0	0	0	0
chr1	169585544	169587983	6	1	0	0	0	1	1	0	1	0	0	1	1
chr1	169549228	169551883	11	1	1	1	1	1	1	0	1	1	1	1	1
chr1	169480118	169481634	8	1	1	1	0	1	1	0	1	0	0	1	1
chr1	169469004	169470227	1	0	0	0	0	1	0	0	0	0	0	0	0
chr1	169441166	169444103	2	0	0	0	0	1	0	0	0	0	1	0	0
chr1	169347425	169355710	12	1	1	1	1	1	1	1	1	1	1	1	1
chr1	169333822	169335941	4	0	1	0	0	1	0	0	1	0	0	1	0
chr1	169324814	169328839	5	0	0	0	1	1	0	1	1	0	0	1	0
chr1	169267736	169267926	1	0	0	0	0	0	0	0	1	0	0	0	0
chr1	169142099	169144916	3	1	1	0	0	0	0	0	1	0	0	0	0
chr1	169109325	169110557	1	0	0	0	1	0	0	0	0	0	0	0	0
chr1	169101742	169104465	10	0	1	1	1	0	1	1	1	1	1	1	1
chr1	169079197	169080734	1	0	0	0	0	0	0	0	1	0	0	0	0
chr1	169059779	169060744	1	0	0	0	0	0	0	0	1	0	0	0	0
chr1	168917352	168918148	1	0	0	0	0	0	0	0	1	0	0	0	0
chr1	168767476	168769149	8	1	1	1	0	1	1	1	1	1	0	0	0
chr1	168763115	168763787	1	0	0	0	0	0	0	0	1	0	0	0	0
chr1	168754078	168756598	12	1	1	1	1	1	1	1	1	1	1	1	1
chr1	168736643	168739423	3	1	0	0	0	0	0	0	1	0	0	1	0
chr1	168723513	168730309	10	1	1	1	1	1	1	0	1	1	1	1	0
chr1	168665457	168666540	3	0	0	0	0	0	0	1	1	1	0	0	0
chr1	168603049	168604039	5	0	1	0	0	0	0	0	1	1	0	1	1
chr1	168451317	168452394	3	0	0	0	0	1	0	0	1	0	0	0	1
chr1	168428244	168429095	2	0	0	0	0	0	0	1	1	0	0	0	0
chr1	168373033	168375071	3	1	1	0	0	0	0	0	0	0	0	0	1
chr1	168302269	168305961	4	0	1	1	0	0	0	0	1	1	0	0	0
chr1	168291264	168295974	6	1	1	1	0	1	1	0	1	0	0	0	0
chr1	168239208	168241686	1	0	0	0	0	0	0	0	1	0	0	0	0
chr18	53886248	53886422	1	0	0	0	0	0	0	0	1	0	0	0	0
chr1	168115654	168118339	9	1	1	1	0	1	0	1	0	1	1	1	1
chr1	168090333	168091566	6	1	0	0	0	0	0	1	1	1	1	1	0
chr1	168083202	168087909	12	1	1	1	1	1	1	1	1	1	1	1	1
chr1	168047802	168052795	7	1	0	0	0	1	1	0	1	0	1	1	1
chr1	167905965	167906261	2	0	0	0	1	0	1	0	0	0	0	0	0
chr1	167903862	167904567	1	0	0	0	0	0	0	0	1	0	0	0	0
chr1	167872657	167873714	3	0	1	0	0	1	0	0	1	0	0	0	0
chr1	167790996	167803947	12	1	1	1	1	1	1	1	1	1	1	1	1
chr1	167755721	167759117	8	1	1	0	0	1	0	1	1	1	1	1	0
chr1	167689898	167694055	3	0	0	0	1	1	0	0	1	0	0	0	0
chr1	167684912	167689075	8	1	1	1	1	1	1	0	1	0	1	0	0
chr1	167678553	167682113	7	1	1	0	0	1	0	1	1	1	0	1	0
chr1	167656657	167660118	8	0	1	0	1	1	1	0	1	1	0	1	1
chr8	785397	785804	8	0	1	0	1	1	1	0	1	1	0	1	1
chr1	167652683	167654173	1	0	0	0	0	0	0	0	1	0	0	0	0
chr1	167647163	167649871	7	1	1	1	0	1	0	0	1	0	0	1	1
chr1	167635081	167640917	12	1	1	1	1	1	1	1	1	1	1	1	1
chr1	167600114	167601135	12	1	1	1	1	1	1	1	1	1	1	1	1
chrX	140032308	140032879	12	1	1	1	1	1	1	1	1	1	1	1	1
chr1	167532354	167535192	12	1	1	1	1	1	1	1	1	1	1	1	1
chr1	167521941	167523296	8	1	0	0	1	1	1	0	1	0	1	1	1
chr1	167515316	167518650	12	1	1	1	1	1	1	1	1	1	1	1	1
chr1	167463703	167469007	11	1	1	1	1	1	1	1	1	1	1	1	0
chr1	167460450	167463424	12	1	1	1	1	1	1	1	1	1	1	1	1
chr1	167442123	167448922	7	0	1	0	1	0	1	1	1	0	0	1	1
chr1	167430952	167433029	1	0	0	0	0	0	0	0	1	0	0	0	0
chr8	73811306	73813610	6	1	0	0	1	1	1	0	0	0	1	1	0
chr1	167425071	167427857	4	0	1	0	0	1	0	0	1	0	0	1	0
chr1	167165388	167175662	12	1	1	1	1	1	1	1	1	1	1	1	1
chr11	130032802	130033278	12	1	1	1	1	1	1	1	1	1	1	1	1
chr8	73861657	73866335	7	1	1	1	1	1	1	0	1	0	0	0	0
chr8	73866365	73866617	1	0	0	0	0	0	0	0	1	0	0	0	0
chr1	167135631	167137825	11	1	1	1	1	1	1	1	1	1	0	1	1
chr8	73870168	73871174	2	0	0	0	0	1	0	0	1	0	0	0	0
chr1	167092557	167095113	1	0	0	0	0	0	0	0	1	0	0	0	0
chr1	167065000	167070987	12	1	1	1	1	1	1	1	1	1	1	1	1
chr1	167058199	167059536	12	1	1	1	1	1	1	1	1	1	1	1	1
chr1	167033425	167034318	5	1	1	0	0	0	0	0	1	0	0	1	1
chr1	166959827	166960636	1	0	0	0	0	0	0	0	0	1	0	0	0
chr1	166951701	166953034	2	0	0	0	0	0	0	0	1	0	1	0	0
chr1	166931909	166935478	4	0	1	0	0	0	0	0	1	0	1	1	0
chr1	166915517	166916622	3	0	1	0	0	0	0	0	1	0	0	1	0
chr1	166910469	166910784	2	0	1	0	0	0	0	0	1	0	0	0	0
chr1	166888174	166890156	4	0	0	0	0	1	1	0	0	0	0	1	1
chr1	166852090	166855833	9	1	1	1	0	1	0	1	1	1	1	1	0
chr1	166367366	166369684	4	0	1	1	0	0	0	0	1	1	0	0	0
chr1	166291938	166294505	1	1	0	0	0	0	0	0	0	0	0	0	0
chr1	166192775	166193324	3	0	0	0	1	1	0	0	0	0	0	1	0
chr1	166157094	166159591	1	0	0	0	0	0	0	0	1	0	0	0	0
chr1	166037608	166046635	12	1	1	1	1	1	1	1	1	1	1	1	1
chr1	165996880	165998495	11	1	1	1	1	1	1	0	1	1	1	1	1
chr1	165914235	165914707	12	1	1	1	1	1	1	1	1	1	1	1	1
chr1	165897389	165903292	6	1	1	1	0	1	0	0	1	0	1	0	0
chr1	165896126	165897098	1	0	0	0	0	0	0	0	1	0	0	0	0
chr1	165879752	165884921	10	1	1	1	0	1	0	1	1	1	1	1	1
chr1	165871165	165871827	10	1	0	1	1	1	0	1	1	1	1	1	1
chr1	165857973	165858931	12	1	1	1	1	1	1	1	1	1	1	1	1
chr1	165845425	165852980	1	1	0	0	0	0	0	0	0	0	0	0	0
chr1	165839150	165843485	12	1	1	1	1	1	1	1	1	1	1	1	1
chr1	165832892	165833751	1	0	0	0	0	0	0	0	1	0	0	0	0
chr1	165823025	165824831	12	1	1	1	1	1	1	1	1	1	1	1	1
chr1	165679292	165682305	8	1	1	0	0	1	0	1	1	1	1	1	0
chr1	165656283	165658796	12	1	1	1	1	1	1	1	1	1	1	1	1
chr1	165652400	165654310	2	0	1	0	0	0	0	0	1	0	0	0	0
chr1	165635528	165637937	7	1	1	1	0	1	1	0	1	0	0	1	0
chr1	165593092	165593968	5	1	1	0	0	1	0	0	1	0	0	1	0
chr1	165579886	165584202	11	1	1	1	1	1	1	0	1	1	1	1	1
chr8	74048450	74051314	2	1	0	0	0	0	0	0	0	0	0	1	0
chr2	121279829	121279921	2	1	0	0	0	0	0	0	0	0	0	1	0
chr1	165542515	165546620	8	1	1	1	1	0	1	0	1	1	0	1	0
chr1	165512922	165514793	4	1	0	0	0	1	0	0	1	0	0	1	0
chr1	165481133	165484832	12	1	1	1	1	1	1	1	1	1	1	1	1
chr1	165400827	165406571	10	1	0	1	1	1	1	0	1	1	1	1	1
chr1	165392117	165394047	12	1	1	1	1	1	1	1	1	1	1	1	1
chr1	165367312	165368497	4	1	0	0	0	1	1	0	1	0	0	0	0
chr1	165363691	165366592	11	1	1	1	1	1	1	1	1	1	0	1	1
chr1	165351574	165358280	12	1	1	1	1	1	1	1	1	1	1	1	1
chr1	165287104	165290641	10	1	1	1	1	1	1	0	1	0	1	1	1
chr1	165278212	165281335	10	1	1	1	1	1	1	1	1	0	1	1	0
chr1	165257750	165258552	3	1	1	0	0	0	0	0	1	0	0	0	0
chr1	165253179	165254872	11	1	1	0	1	1	1	1	1	1	1	1	1
chr1	165207649	165208556	7	1	1	1	0	1	0	0	1	1	0	0	1
chr1	165162405	165163706	8	1	1	1	0	1	0	0	1	1	0	1	1
chr1	165152647	165153701	4	1	1	0	0	1	0	0	1	0	0	0	0
chr1	165144182	165145740	10	1	1	1	1	1	1	0	1	1	0	1	1
chr1	165129472	165131395	9	1	1	1	1	1	1	1	1	0	0	1	0
chr1	165117300	165120227	12	1	1	1	1	1	1	1	1	1	1	1	1
chr1	165052281	165054262	3	1	1	0	0	0	0	0	1	0	0	0	0
chr6	117132255	117132336	3	1	1	0	0	0	0	0	1	0	0	0	0
chr8	74087522	74088324	10	1	1	1	1	1	0	1	1	1	0	1	1
chr1	164918054	164919866	2	0	0	0	0	0	0	0	1	1	0	0	0
chr1	164868153	164872034	6	1	1	0	0	1	0	1	1	1	0	0	0
chr1	164863937	164865452	1	0	0	0	0	0	0	0	1	0	0	0	0
chr1	164841841	164843510	3	0	1	0	0	0	0	0	1	1	0	0	0
chr1	164824760	164827831	2	0	0	0	0	0	0	0	1	1	0	0	0
chr1	164774474	164776027	2	0	0	0	0	0	0	0	1	0	0	1	0
chr1	164770296	164773453	7	1	1	1	1	1	1	0	0	0	1	0	0
chr1	164757580	164761952	2	1	0	0	1	0	0	0	0	0	0	0	0
chr1	164714924	164717609	6	0	0	0	0	1	1	0	1	0	1	1	1
chr1	164703393	164704883	6	1	1	1	1	1	1	0	0	0	0	0	0
chr1	164678328	164679518	2	0	0	0	0	0	0	0	1	0	0	1	0
chr1	164669984	164673393	2	0	0	0	0	1	1	0	0	0	0	0	0
chr1	164646318	164650362	12	1	1	1	1	1	1	1	1	1	1	1	1
chr1	164634112	164639286	9	1	1	1	1	1	1	0	1	0	1	1	0
chr1	164617766	164619802	8	1	1	0	1	1	1	0	0	0	1	1	1
chr1	164613252	164615110	1	1	0	0	0	0	0	0	0	0	0	0	0
chr1	164591618	164592671	1	0	0	0	0	0	0	1	0	0	0	0	0
chr1	164583121	164585762	5	1	1	1	0	0	0	1	1	0	0	0	0
chr1	164575426	164579021	6	1	1	0	0	1	0	0	1	1	1	0	0
chr1	164445628	164446596	2	0	0	0	0	0	0	0	1	1	0	0	0
chr1	164422067	164426023	8	1	0	0	1	1	1	0	1	1	1	1	0
chr1	164380261	164381943	11	1	1	1	0	1	1	1	1	1	1	1	1
chr1	164371127	164375078	10	1	1	1	1	1	1	0	1	0	1	1	1
chr1	164316928	164319773	5	1	0	1	0	1	1	0	0	0	0	1	0
chr1	164295205	164299553	12	1	1	1	1	1	1	1	1	1	1	1	1
chr1	164228884	164230777	12	1	1	1	1	1	1	1	1	1	1	1	1
chr1	164225889	164228321	12	1	1	1	1	1	1	1	1	1	1	1	1
chr1	164173541	164178246	10	1	0	1	1	1	1	1	0	1	1	1	1
chr1	163897205	163897985	1	0	0	0	0	1	0	0	0	0	0	0	0
chr1	163767012	163768457	3	1	1	1	0	0	0	0	0	0	0	0	0
chr1	163673421	163675276	2	1	0	0	0	1	0	0	0	0	0	0	0
chr1	163670361	163671334	2	0	0	0	0	1	1	0	0	0	0	0	0
chr1	163647655	163649357	2	1	0	0	0	1	0	0	0	0	0	0	0
chr1	163537623	163539364	11	1	0	1	1	1	1	1	1	1	1	1	1
chr1	163504155	163505527	1	0	0	0	0	0	0	0	1	0	0	0	0
chr1	163335825	163336005	10	1	1	0	1	1	1	1	1	0	1	1	1
chr8	74193874	74195981	9	1	1	1	0	1	0	1	1	1	0	1	1
chr4	98879846	98879948	5	1	0	0	0	1	0	0	0	0	1	1	1
chr8	14310684	14310798	5	1	0	0	0	1	0	0	0	0	1	1	1
chr17	49423293	49423484	5	1	0	0	0	1	0	0	0	0	1	1	1
chr1	163249974	163251158	8	1	0	1	0	1	0	1	1	0	1	1	1
chr18	32037111	32037204	8	1	0	1	0	1	0	1	1	0	1	1	1
chr1	163201796	163203416	12	1	1	1	1	1	1	1	1	1	1	1	1
chr1	163102364	163103262	2	0	1	0	0	0	0	0	1	0	0	0	0
chr1	163093174	163095022	1	0	0	0	0	0	0	0	1	0	0	0	0
chr1	162945049	162945427	1	0	0	0	0	0	0	0	1	0	0	0	0
chr1	162878914	162882978	5	0	1	0	0	1	1	0	1	0	0	0	1
chr1	162877308	162878546	12	1	1	1	1	1	1	1	1	1	1	1	1
chr1	162874006	162874568	2	1	0	0	0	0	0	0	1	0	0	0	0
chr1	162780110	162780448	1	0	0	0	0	0	0	0	1	0	0	0	0
chr1	162752277	162755361	11	1	1	1	1	1	0	1	1	1	1	1	1
chr1	162732301	162733688	1	0	0	0	0	0	0	0	1	0	0	0	0
chr1	162687045	162692330	12	1	1	1	1	1	1	1	1	1	1	1	1
chr8	74248240	74257959	10	1	1	1	0	1	1	1	1	1	0	1	1
chr1	162678393	162684362	10	1	1	1	0	1	0	1	1	1	1	1	1
chr1	162675239	162677401	2	0	1	0	0	0	0	0	1	0	0	0	0
chr1	162671608	162672359	2	0	0	0	0	0	0	0	1	0	0	1	0
chr1	162630323	162636366	12	1	1	1	1	1	1	1	1	1	1	1	1
chr1	162612883	162613904	12	1	1	1	1	1	1	1	1	1	1	1	1
chr1	162540304	162542426	4	0	1	0	0	1	0	0	1	0	1	0	0
chr1	162411781	162412468	2	0	1	0	0	0	0	0	1	0	0	0	0
chr1	162366646	162367739	1	0	0	0	0	0	0	0	0	1	0	0	0
chr1	162283300	162286836	12	1	1	1	1	1	1	1	1	1	1	1	1
chr1	162234686	162236333	5	1	1	1	0	1	0	0	1	0	0	0	0
chr1	162204630	162205819	1	0	0	0	0	0	0	0	1	0	0	0	0
chr1	162202779	162203459	3	0	1	0	0	0	0	0	1	0	0	1	0
chr1	162194148	162196866	4	1	0	0	0	0	0	0	1	0	1	1	0
chr1	162165352	162169789	5	1	1	0	0	0	1	0	1	0	0	0	1
chr1	162118854	162120432	12	1	1	1	1	1	1	1	1	1	1	1	1
chr1	162112867	162114607	7	1	1	1	0	1	0	1	1	0	1	0	0
chr1	162079427	162080405	3	0	1	0	0	0	0	0	1	0	0	1	0
chr1	162062104	162063741	12	1	1	1	1	1	1	1	1	1	1	1	1
chr1	162036276	162036789	4	1	1	0	0	1	0	0	1	0	0	0	0
chr1	162028021	162029693	6	1	1	1	0	0	0	1	1	1	0	0	0
chr1	162007639	162012703	8	1	1	1	0	1	1	1	1	0	1	0	0
chr1	161962007	161963985	7	1	1	1	0	0	0	1	1	1	1	0	0
chr1	161946565	161948530	1	1	0	0	0	0	0	0	0	0	0	0	0
chr1	161934709	161943545	12	1	1	1	1	1	1	1	1	1	1	1	1
chr5	229676	230054	12	1	1	1	1	1	1	1	1	1	1	1	1
chr1	161906527	161907618	1	0	0	0	0	0	0	0	1	0	0	0	0
chr1	161893467	161894170	8	1	1	1	0	1	0	1	1	1	1	0	0
chr1	161884020	161886403	12	1	1	1	1	1	1	1	1	1	1	1	1
chr1	161872557	161874463	4	0	0	0	0	0	0	1	1	1	1	0	0
chr1	161804808	161806281	7	1	1	0	0	1	0	1	1	1	1	0	0
chr8	74304438	74306482	6	1	1	0	0	1	0	1	1	1	0	0	0
chr1	161778648	161782079	8	1	1	1	0	1	1	0	1	0	1	1	0
chr1	161373987	161374595	11	1	1	1	0	1	1	1	1	1	1	1	1
chr1	161304009	161306628	11	1	1	1	1	1	1	0	1	1	1	1	1
chr1	161272574	161275199	7	1	0	0	0	1	0	1	1	1	1	1	0
chr1	161266049	161268014	12	1	1	1	1	1	1	1	1	1	1	1	1
chr1	161207281	161212548	6	1	0	0	0	1	1	0	1	0	0	1	1
chr1	161192114	161194160	5	1	1	0	1	1	0	0	0	0	0	1	0
chr1	161088952	161089851	1	1	0	0	0	0	0	0	0	0	0	0	0
chr1	161082586	161086435	6	1	0	0	0	1	0	0	1	0	1	1	1
chr1	161071062	161074218	7	1	1	1	0	1	0	0	1	0	1	1	0
chr1	161013719	161021675	12	1	1	1	1	1	1	1	1	1	1	1	1
chr1	160879598	160889199	12	1	1	1	1	1	1	1	1	1	1	1	1
chr1	160876294	160876843	12	1	1	1	1	1	1	1	1	1	1	1	1
chr1	160876856	160884992	11	1	1	1	1	1	1	0	1	1	1	1	1
chr1	160889008	160889350	12	1	1	1	1	1	1	1	1	1	1	1	1
chr3	196536500	196536814	12	1	1	1	1	1	1	1	1	1	1	1	1
chr8	74357651	74358751	3	1	0	1	0	1	0	0	0	0	0	0	0
chr1	160831664	160843048	7	1	0	0	1	0	1	0	1	1	0	1	1
chr1	160755886	160756988	1	0	0	0	0	0	0	0	1	0	0	0	0
chr8	74365549	74366942	1	0	0	0	0	0	0	0	1	0	0	0	0
chr8	74404669	74406899	7	0	1	1	0	0	0	1	1	1	0	1	1
chr1	160431162	160433093	1	0	0	0	0	0	0	0	1	0	0	0	0
chr1	160415368	160418603	12	1	1	1	1	1	1	1	1	1	1	1	1
chr1	160406042	160409425	5	0	0	1	0	0	1	1	1	1	0	0	0
chr1	160369874	160372244	12	1	1	1	1	1	1	1	1	1	1	1	1
chr1	160358552	160361241	6	1	1	1	0	0	1	1	1	0	0	0	0
chr1	160291117	160293090	1	0	0	0	0	1	0	0	0	0	0	0	0
chr10	46003199	46003721	2	0	0	0	0	1	0	0	1	0	0	0	0
chr10	45982517	45988844	2	0	0	0	0	1	0	0	1	0	0	0	0
chr10	45972563	45975507	2	0	0	0	0	1	0	0	1	0	0	0	0
chr1	160187083	160189073	3	0	1	1	0	0	0	0	1	0	0	0	0
chr1	160162185	160164074	2	0	1	0	0	0	0	0	1	0	0	0	0
chr1	160115203	160116567	3	0	0	0	1	0	1	0	0	1	0	0	0
chr1	160107202	160114984	11	0	1	1	1	1	1	1	1	1	1	1	1
chr1	160102696	160106045	1	0	0	0	0	0	0	0	0	0	0	0	1
chr1	160087068	160090477	3	0	1	1	0	0	0	0	1	0	0	0	0
chr1	160083727	160086804	12	1	1	1	1	1	1	1	1	1	1	1	1
chr1	160066015	160067148	1	0	1	0	0	0	0	0	0	0	0	0	0
chr1	160054001	160056227	11	1	1	1	1	1	1	0	1	1	1	1	1
chr1	160041791	160043137	4	1	1	0	0	0	0	0	1	0	0	1	0
chr1	160022182	160022809	9	0	1	0	1	1	1	1	1	0	1	1	1
chr1	160010205	160011412	2	1	0	0	0	0	0	0	1	0	0	0	0
chr1	160007344	160008772	3	0	0	0	0	1	0	0	1	1	0	0	0
chr1	160004982	160006829	12	1	1	1	1	1	1	1	1	1	1	1	1
chr1	159940787	159942555	2	1	0	0	0	0	0	0	0	0	0	0	1
chr1	159915548	159940298	12	1	1	1	1	1	1	1	1	1	1	1	1
chr1	159907989	159912046	4	1	1	0	1	0	0	0	1	0	0	0	0
chr1	159892961	159897994	9	1	1	0	1	1	1	0	1	1	1	1	0
chr1	159886942	159891161	9	1	0	1	1	0	1	0	1	1	1	1	1
chr1	159881093	159883102	1	0	0	0	0	0	0	0	1	0	0	0	0
chr1	159871756	159873004	4	1	1	0	1	0	0	0	1	0	0	0	0
chr1	159869684	159870260	1	0	0	0	0	0	0	0	1	0	0	0	0
chr1	159836626	159837662	4	0	1	0	0	0	0	0	1	1	0	1	0
chr1	159792549	159795001	1	0	0	0	0	1	0	0	0	0	0	0	0
chr1	159213863	159214628	1	0	0	0	0	0	0	0	1	0	0	0	0
chr1	159177072	159178329	7	1	1	1	1	1	0	0	1	1	0	0	0
chr1	159132393	159133458	1	0	0	1	0	0	0	0	0	0	0	0	0
chr1	159120930	159124296	12	1	1	1	1	1	1	1	1	1	1	1	1
chr1	159071880	159073038	6	1	1	1	0	1	0	0	1	1	0	0	0
chr1	159009853	159010093	1	0	0	0	0	0	0	0	1	0	0	0	0
chr1	240189715	240192921	3	1	1	0	0	0	0	0	1	0	0	0	0
chr1	240217010	240218959	5	0	0	0	1	1	1	0	0	0	1	1	0
chr1	240265555	240271910	11	1	1	1	0	1	1	1	1	1	1	1	1
chr1	240280358	240282646	1	0	0	0	0	0	0	0	1	0	0	0	0
chr1	240293338	240294467	1	0	0	0	0	1	0	0	0	0	0	0	0
chr1	240309545	240312639	2	0	1	0	0	0	0	0	1	0	0	0	0
chr1	240336265	240337130	9	1	1	1	1	1	1	0	1	1	0	1	0
chr1	240397802	240398918	2	1	0	0	0	0	0	0	1	0	0	0	0
chr1	240400223	240400765	1	0	0	0	0	0	0	0	1	0	0	0	0
chr1	240422792	240424111	1	0	0	0	0	0	0	0	1	0	0	0	0
chr1	240505485	240507754	12	1	1	1	1	1	1	1	1	1	1	1	1
chr1	240543598	240546610	1	0	0	0	0	1	0	0	0	0	0	0	0
chr1	240691725	240692375	1	0	0	0	0	0	0	0	1	0	0	0	0
chr1	240714504	240715258	7	1	1	1	0	0	0	1	1	1	0	1	0
chr1	240732218	240732553	4	0	1	1	0	0	0	0	1	1	0	0	0
chr1	241114101	241114659	2	1	0	0	0	0	0	0	1	0	0	0	0
chr1	241129913	241130957	4	0	0	0	0	0	0	1	1	1	1	0	0
chr1	241235204	241235886	3	0	1	1	0	0	0	0	1	0	0	0	0
chr1	241298018	241298835	2	1	0	1	0	0	0	0	0	0	0	0	0
chr1	241320100	241320978	1	0	0	0	0	0	0	0	1	0	0	0	0
chr1	241609376	241609923	5	1	0	0	0	0	1	0	1	1	0	0	1
chr1	241652634	241655805	3	0	0	0	0	0	0	1	1	1	0	0	0
chr1	241678521	241682798	8	1	1	1	0	1	0	1	1	1	0	1	0
chr1	241841621	241842509	5	1	0	1	0	1	0	0	1	0	0	1	0
chr1	242164539	242165591	1	0	0	0	0	0	0	0	0	0	0	1	0
chr1	242448422	242450906	11	1	1	1	0	1	1	1	1	1	1	1	1
chr8	74877213	74878207	1	0	0	0	0	0	0	0	1	0	0	0	0
chr8	74905531	74906925	1	0	0	0	0	0	0	0	1	0	0	0	0
chr8	74912838	74914302	5	1	1	0	0	0	0	0	1	1	0	1	0
chr1	243018872	243019614	6	1	1	1	1	1	0	0	1	0	0	0	0
chr1	243260280	243261879	3	1	1	0	0	0	0	0	1	0	0	0	0
chr1	243273257	243274589	7	1	1	0	0	1	0	0	1	1	1	1	0
chr1	243271951	243272491	7	1	1	0	0	1	0	0	1	1	1	1	0
chr1	243287304	243289609	2	0	1	0	0	0	0	0	1	0	0	0	0
chr1	243325335	243325596	1	0	0	0	0	1	0	0	0	0	0	0	0
chr1	243349384	243352581	4	0	0	0	0	1	0	0	1	1	0	1	0
chr1	243363449	243365478	6	0	0	0	0	1	1	1	0	1	0	1	1
chr1	243419729	243421100	5	1	0	0	0	1	0	0	1	0	0	1	1
chr1	243451264	243454723	9	1	1	1	0	1	1	1	1	1	0	1	0
chr1	243455636	243456391	1	0	0	0	0	0	0	0	0	0	0	1	0
chr1	243461840	243463416	1	0	0	0	0	0	0	0	1	0	0	0	0
chr1	243469364	243477284	11	1	1	1	1	1	1	1	1	1	0	1	1
chr1	243490393	243494095	4	0	0	0	0	1	0	0	1	1	0	0	1
chr1	243695518	243697309	11	1	1	0	1	1	1	1	1	1	1	1	1
chr8	74973632	74976700	7	1	1	1	0	1	0	1	1	1	0	0	0
chr1	243842702	243844430	7	1	1	0	0	1	1	0	1	0	1	1	0
chr1	243851932	243852461	1	0	0	0	0	0	0	0	0	1	0	0	0
chr1	243887780	243889766	3	1	0	0	0	0	0	0	1	1	0	0	0
chr1	243888560	243888781	3	1	0	0	0	0	0	0	1	1	0	0	0
chr1	243935592	243936415	6	1	1	1	1	1	0	0	1	0	0	0	0
chr1	243974053	243975260	9	1	1	0	1	1	1	0	1	0	1	1	1
chr8	75003800	75009678	8	1	1	1	0	1	0	0	1	1	0	1	1
chr1	244027143	244029800	3	0	0	0	0	1	0	0	1	0	0	0	1
chr1	244052453	244055290	8	1	1	0	1	1	1	0	1	0	0	1	1
chr1	244064462	244068928	7	1	1	0	1	1	1	0	0	0	0	1	1
chr1	244084745	244085275	1	0	0	0	0	0	0	0	1	0	0	0	0
chr1	244157419	244160164	3	1	0	0	0	1	0	0	1	0	0	0	0
chr1	244212270	244214894	6	1	1	1	0	0	0	0	1	0	0	1	1
chr1	244352058	244354015	3	0	1	1	0	0	0	0	1	0	0	0	0
chr1	244584795	244585960	3	0	1	0	0	0	0	0	1	1	0	0	0
chr4	151761199	151761253	3	0	1	0	0	0	0	0	1	1	0	0	0
chr1	244595312	244605365	4	1	0	0	0	1	0	0	1	0	0	1	0
chr1	244584795	244586018	8	1	1	1	0	1	0	0	1	1	0	1	1
chr1	244656221	244657323	4	1	1	0	0	0	0	1	1	0	0	0	0
chr1	244669749	244673534	4	0	1	0	0	0	0	1	1	1	0	0	0
chr1	244778418	244778918	5	1	1	0	0	0	0	1	1	0	1	0	0
chr9	1010809	1011015	5	1	1	0	0	0	0	1	1	0	1	0	0
chr12	31792180	31792247	5	1	1	0	0	0	0	1	1	0	1	0	0
chr17	75778139	75779188	5	1	1	0	0	0	0	1	1	0	1	0	0
chr8	75088269	75091331	10	1	1	1	0	1	0	1	1	1	1	1	1
chr1	244964291	244965242	5	1	1	1	0	1	0	0	1	0	0	0	0
chr1	244986971	244988116	10	1	1	1	0	1	0	1	1	1	1	1	1
chr1	245041815	245043046	3	1	1	0	0	0	0	0	0	1	0	0	0
chr1	245091134	245094283	5	1	0	0	0	1	0	1	1	0	0	1	0
chr1	245153022	245159056	12	1	1	1	1	1	1	1	1	1	1	1	1
chr1	245168817	245175266	12	1	1	1	1	1	1	1	1	1	1	1	1
chr1	245176329	245177972	1	1	0	0	0	0	0	0	0	0	0	0	0
chr1	245197690	245199475	8	1	1	1	0	1	0	1	1	1	0	1	0
chr1	245200897	245206810	6	1	0	0	1	1	1	0	0	0	1	1	0
chr1	245256318	245259525	8	1	0	1	0	1	1	0	1	1	1	1	0
chr1	245288236	245289594	12	1	1	1	1	1	1	1	1	1	1	1	1
chr1	245295829	245297122	6	1	1	1	0	0	0	0	1	0	1	1	0
chr1	245317254	245319912	2	0	1	0	0	0	0	0	1	0	0	0	0
chr1	245325788	245326984	1	0	0	0	0	0	0	0	1	0	0	0	0
chr1	245354859	245358292	1	0	0	0	0	1	0	0	0	0	0	0	0
chr1	245368216	245368849	4	1	1	0	0	0	0	1	1	0	0	0	0
chr1	245370879	245372727	2	0	1	0	0	1	0	0	0	0	0	0	0
chr1	245400614	245402842	3	0	0	0	1	1	1	0	0	0	0	0	0
chr1	245435548	245438869	9	1	1	1	1	1	1	0	1	0	1	1	0
chr1	245440636	245442649	6	1	1	0	1	1	1	0	1	0	0	0	0
chr1	245509608	245513772	8	1	1	1	1	1	1	0	0	0	1	0	1
chr1	245575867	245579315	7	1	1	1	0	0	0	1	1	0	1	1	0
chr1	245607335	245611220	5	1	0	0	1	1	1	0	0	0	0	1	0
chr1	245615276	245616419	1	0	0	0	0	0	1	0	0	0	0	0	0
chr1	245621475	245622279	2	0	0	0	0	1	1	0	0	0	0	0	0
chr8	75145801	75146919	1	0	0	0	0	0	0	0	1	0	0	0	0
chr1	245703697	245708827	12	1	1	1	1	1	1	1	1	1	1	1	1
chr1	245715012	245716812	9	1	1	1	0	1	0	1	1	1	1	1	0
chr1	245742821	245748318	8	1	1	0	1	1	1	0	0	0	1	1	1
chr1	245802125	245803478	3	0	1	1	0	0	0	0	1	0	0	0	0
chr1	245823307	245825727	7	1	1	0	0	0	0	1	1	1	1	1	0
chr1	245831037	245832134	3	1	0	0	0	0	0	0	1	1	0	0	0
chr1	245855755	245859323	11	1	1	1	1	1	0	1	1	1	1	1	1
chr1	245861827	245862304	5	1	0	0	0	0	0	1	1	1	0	1	0
chr1	245865820	245868928	9	1	1	1	0	1	0	1	1	1	0	1	1
chr1	245870121	245876131	12	1	1	1	1	1	1	1	1	1	1	1	1
chr1	245926792	245932446	6	1	1	0	1	1	1	0	0	0	1	0	0
chr1	245947841	245951908	4	0	0	0	1	1	0	0	0	0	0	1	1
chr1	245997412	245998617	10	1	1	1	0	1	1	1	1	0	1	1	1
chr1	246000704	246006553	3	0	0	0	1	1	1	0	0	0	0	0	0
chr1	246006554	246011014	12	1	1	1	1	1	1	1	1	1	1	1	1
chr1	246049756	246052871	4	1	1	0	0	0	0	1	1	0	0	0	0
chr1	246062030	246063511	1	0	0	0	0	1	0	0	0	0	0	0	0
chr1	246066632	246070081	10	1	1	0	1	1	1	0	1	1	1	1	1
chr1	246089484	246095520	2	0	0	0	0	1	0	0	0	0	0	1	0
chr1	246270487	246275191	5	1	0	1	1	1	1	0	0	0	0	0	0
chr1	246412906	246414293	3	0	0	0	1	1	1	0	0	0	0	0	0
chr1	246450779	246451800	11	1	1	1	0	1	1	1	1	1	1	1	1
chr1	246501545	246503056	7	1	0	0	0	1	0	1	1	1	1	1	0
chr1	246582977	246588629	11	1	1	1	0	1	1	1	1	1	1	1	1
chr1	246599811	246608617	2	0	0	0	0	0	0	0	1	0	1	0	0
chr1	246648324	246653487	11	1	1	0	1	1	1	1	1	1	1	1	1
chr1	246666016	246667870	1	0	0	0	0	0	0	1	0	0	0	0	0
chr1	246682473	246682842	12	1	1	1	1	1	1	1	1	1	1	1	1
chr1	246962023	246962441	2	0	0	0	0	0	0	1	1	0	0	0	0
chr1	227447309	227452310	12	1	1	1	1	1	1	1	1	1	1	1	1
chr1	227439913	227441580	4	1	0	0	1	1	1	0	0	0	0	0	0
chr1	227437140	227437965	1	0	0	0	0	1	0	0	0	0	0	0	0
chr1	227372574	227374116	11	1	1	0	1	1	1	1	1	1	1	1	1
chr1	227306162	227307474	2	0	0	0	0	1	0	0	1	0	0	0	0
chr1	227225207	227226223	2	0	0	0	0	0	0	1	1	0	0	0	0
chr2	28821508	28821860	1	0	0	0	0	0	0	0	1	0	0	0	0
chr1	227033314	227035064	6	1	1	0	1	1	1	0	1	0	0	0	0
chr1	226973950	226977024	1	0	0	0	0	1	0	0	0	0	0	0	0
chr1	226911726	226913515	12	1	1	1	1	1	1	1	1	1	1	1	1
chr1	226883285	226883817	10	1	1	1	1	0	1	0	1	1	1	1	1
chr16	318009	318114	10	1	1	1	1	0	1	0	1	1	1	1	1
chr16	317984	318114	10	1	1	1	1	0	1	0	1	1	1	1	1
chr16	317984	318114	10	1	1	1	1	0	1	0	1	1	1	1	1
chr16	317984	318060	10	1	1	1	1	0	1	0	1	1	1	1	1
chr16	317984	318084	10	1	1	1	1	0	1	0	1	1	1	1	1
chr16	317984	318084	10	1	1	1	1	0	1	0	1	1	1	1	1
chr16	318034	318114	10	1	1	1	1	0	1	0	1	1	1	1	1
chr1	24907621	24908327	10	1	1	1	1	0	1	0	1	1	1	1	1
chr16	317993	318098	10	1	1	1	1	0	1	0	1	1	1	1	1
chr16	317984	318084	10	1	1	1	1	0	1	0	1	1	1	1	1
chr16	317984	318114	10	1	1	1	1	0	1	0	1	1	1	1	1
chr16	317984	318084	10	1	1	1	1	0	1	0	1	1	1	1	1
chr16	317984	318114	10	1	1	1	1	0	1	0	1	1	1	1	1
chr16	317984	318084	10	1	1	1	1	0	1	0	1	1	1	1	1
chr16	317984	318084	10	1	1	1	1	0	1	0	1	1	1	1	1
chr1	226872757	226876495	12	1	1	1	1	1	1	1	1	1	1	1	1
chr1	226827537	226829666	12	1	1	1	1	1	1	1	1	1	1	1	1
chr1	226820984	226822304	12	1	1	1	1	1	1	1	1	1	1	1	1
chr1	226813914	226816579	11	1	1	1	1	1	1	0	1	1	1	1	1
chr1	226809580	226811602	11	1	1	1	1	1	1	1	1	0	1	1	1
chr1	226807984	226809471	5	1	0	0	1	1	1	0	0	0	0	0	1
chr1	226733976	226741553	12	1	1	1	1	1	1	1	1	1	1	1	1
chrX	39787429	39788214	12	1	1	1	1	1	1	1	1	1	1	1	1
chr15	44354500	44354576	12	1	1	1	1	1	1	1	1	1	1	1	1
chr1	226710821	226712969	3	1	0	0	0	0	1	0	1	0	0	0	0
chr1	226648432	226665655	12	1	1	1	1	1	1	1	1	1	1	1	1
chr1	226640421	226645257	8	1	1	1	0	1	0	1	1	1	0	1	0
chr1	226632190	226640059	12	1	1	1	1	1	1	1	1	1	1	1	1
chr1	226625664	226631431	12	1	1	1	1	1	1	1	1	1	1	1	1
chr1	226566442	226570538	9	1	0	1	0	1	0	1	1	1	1	1	1
chr1	226547731	226550892	12	1	1	1	1	1	1	1	1	1	1	1	1
chr1	226428094	226429327	7	1	0	0	0	1	1	1	1	1	1	0	0
chr1	226424397	226425230	1	0	0	0	0	0	0	0	1	0	0	0	0
chr1	226222777	226225572	12	1	1	1	1	1	1	1	1	1	1	1	1
chr1	226215043	226221207	12	1	1	1	1	1	1	1	1	1	1	1	1
chr1	226197073	226197374	1	0	0	0	0	0	0	0	1	0	0	0	0
chr1	209770294	209771346	12	1	1	1	1	1	1	1	1	1	1	1	1
chr1	226071361	226071965	2	0	0	0	0	0	0	1	0	0	1	0	0
chr1	225944263	225947723	10	1	1	1	1	1	1	1	0	0	1	1	1
chr1	225939075	225941484	7	1	0	0	0	1	1	1	1	0	1	1	0
chr1	225910179	225913849	12	1	1	1	1	1	1	1	1	1	1	1	1
chr1	225886352	225890612	11	1	1	1	1	1	1	1	1	1	1	1	0
chr1	225940600	225940732	11	1	1	1	1	1	1	1	1	1	1	1	0
chr1	225876961	225884293	12	1	1	1	1	1	1	1	1	1	1	1	1
chr1	225879805	225879885	12	1	1	1	1	1	1	1	1	1	1	1	1
chr1	225846008	225848523	3	0	0	0	1	1	0	0	1	0	0	0	0
chr1	225845185	225846008	8	1	1	0	1	1	1	0	1	0	1	1	0
chr1	225846016	225846505	8	1	1	0	1	1	1	0	1	0	1	1	0
chr1	224390822	224391101	1	0	0	0	0	0	0	0	1	0	0	0	0
chr1	224424493	224425282	1	0	0	0	0	0	0	0	1	0	0	0	0
chr1	224431652	224437077	12	1	1	1	1	1	1	1	1	1	1	1	1
chr1	224453508	224459885	9	1	1	1	0	1	0	1	1	1	1	0	1
chr1	224459606	224459885	9	1	1	1	0	1	0	1	1	1	1	0	1
chr1	224495040	224498837	6	0	1	1	0	1	0	1	1	0	0	0	1
chr1	224513644	224513915	12	1	1	1	1	1	1	1	1	1	1	1	1
chr1	224611245	224612584	9	1	1	0	1	1	1	1	0	0	1	1	1
chr1	6834441	6834466	9	1	1	0	1	1	1	1	0	0	1	1	1
chr1	224670265	224671852	7	1	1	0	0	1	1	1	1	1	0	0	0
chr1	224680907	224683941	1	0	0	0	0	1	0	0	0	0	0	0	0
chr1	224692805	224694600	2	0	1	0	0	0	0	0	1	0	0	0	0
chr1	224702205	224704158	10	1	1	1	0	1	1	1	1	0	1	1	1
chr1	224720653	224724457	12	1	1	1	1	1	1	1	1	1	1	1	1
chr1	224724709	224728850	12	1	1	1	1	1	1	1	1	1	1	1	1
chr1	224748604	224749774	4	0	0	0	0	1	0	1	1	0	0	1	0
chr1	224796873	224800892	12	1	1	1	1	1	1	1	1	1	1	1	1
chr1	224823681	224830909	12	1	1	1	1	1	1	1	1	1	1	1	1
chr1	224833306	224835595	12	1	1	1	1	1	1	1	1	1	1	1	1
chr1	224847280	224848713	3	1	1	0	0	0	1	0	0	0	0	0	0
chr1	224860537	224862251	7	1	1	0	0	0	0	1	1	1	1	1	0
chr1	224894683	224895291	2	0	0	0	0	1	1	0	0	0	0	0	0
chr1	225042773	225043582	4	0	0	0	0	1	1	0	0	0	1	0	1
chr1	225517121	225517973	1	0	0	0	0	0	0	0	0	0	1	0	0
chr1	225593598	225594563	1	0	0	0	0	0	0	0	0	0	1	0	0
chr1	225695705	225696652	2	0	0	0	0	1	1	0	0	0	0	0	0
chr1	225728034	225728600	7	1	1	0	0	1	0	0	1	0	1	1	1
chr1	225734146	225740448	9	1	1	1	0	1	0	1	1	0	1	1	1
chr1	225745324	225747725	12	1	1	1	1	1	1	1	1	1	1	1	1
chr1	225766744	225767454	1	0	0	0	0	0	1	0	0	0	0	0	0
chr1	225769117	225772932	9	1	1	0	1	1	1	1	1	0	1	1	0
chr3	13862028	13862698	12	1	1	1	1	1	1	1	1	1	1	1	1
chr3	13878696	13883206	12	1	1	1	1	1	1	1	1	1	1	1	1
chr1	224211343	224214268	12	1	1	1	1	1	1	1	1	1	1	1	1
chr1	224065733	224069547	12	1	1	1	1	1	1	1	1	1	1	1	1
chr8	143066142	143066576	12	1	1	1	1	1	1	1	1	1	1	1	1
chr1	223741035	223743080	2	0	1	0	0	0	0	0	1	0	0	0	0
chr1	223723371	223737470	10	1	1	1	0	0	1	1	1	1	1	1	1
chr20	39105206	39105297	10	1	1	1	0	0	1	1	1	1	1	1	1
chr20	39105165	39105349	10	1	1	1	0	0	1	1	1	1	1	1	1
chr1	223705927	223708333	9	1	0	1	1	1	0	0	1	1	1	1	1
chr1	223707965	223708058	9	1	0	1	1	1	0	0	1	1	1	1	1
chr1	223700941	223703806	12	1	1	1	1	1	1	1	1	1	1	1	1
chr1	223698134	223698684	10	1	1	1	1	1	1	1	1	1	1	0	0
chr1	223694867	223695263	1	0	0	0	0	0	0	0	1	0	0	0	0
chr1	223684369	223684426	1	0	0	0	1	0	0	0	0	0	0	0	0
chr17	76901974	76902097	1	0	0	0	1	0	0	0	0	0	0	0	0
chr1	223543009	223543740	2	0	0	0	0	0	0	0	0	0	1	0	1
chr1	223499524	223500978	1	1	0	0	0	0	0	0	0	0	0	0	0
chr1	223339187	223342300	12	1	1	1	1	1	1	1	1	1	1	1	1
chr1	223336418	223338313	1	0	0	0	0	0	0	0	0	0	1	0	0
chr1	223276551	223287767	5	0	1	0	1	1	0	0	0	0	1	1	0
chr1	223256184	223259384	6	1	1	0	0	1	0	0	1	1	0	1	0
chr1	223221069	223223589	5	0	0	0	1	0	1	0	0	1	0	1	1
chr8	1692205	1692449	5	0	0	0	1	0	1	0	0	1	0	1	1
chr8	1692177	1692497	5	0	0	0	1	0	1	0	0	1	0	1	1
chr8	1692289	1692497	5	0	0	0	1	0	1	0	0	1	0	1	1
chr8	1692331	1692497	5	0	0	0	1	0	1	0	0	1	0	1	1
chr8	1691776	1692497	5	0	0	0	1	0	1	0	0	1	0	1	1
chr1	223212556	223213312	1	0	0	0	0	1	0	0	0	0	0	0	0
chr1	223201529	223202588	12	1	1	1	1	1	1	1	1	1	1	1	1
chr1	223145322	223151616	11	1	1	1	1	1	1	1	1	0	1	1	1
chr7	15354396	15354439	11	1	1	1	1	1	1	1	1	0	1	1	1
chr1	223140633	223144712	12	1	1	1	1	1	1	1	1	1	1	1	1
chr1	223102749	223103991	5	0	1	0	1	0	0	1	1	0	1	0	0
chr1	223081164	223088671	12	1	1	1	1	1	1	1	1	1	1	1	1
chr1	223074383	223079738	9	0	1	0	1	1	0	1	1	1	1	1	1
chr1	223066685	223068745	2	0	1	0	0	0	0	0	1	0	0	0	0
chr1	223051543	223055762	10	1	1	1	0	1	1	1	1	1	1	1	0
chr1	223006689	223011396	12	1	1	1	1	1	1	1	1	1	1	1	1
chr1	222986187	222987967	3	0	0	0	0	1	1	0	0	0	1	0	0
chr1	222972427	222975968	1	0	0	0	0	0	0	0	1	0	0	0	0
chr1	222958144	222972002	11	1	1	1	1	1	1	1	1	1	1	0	1
chr1	222951726	222954433	7	1	0	1	1	1	1	1	0	0	1	0	0
chr1	222934447	222950768	12	1	1	1	1	1	1	1	1	1	1	1	1
chr1	222927775	222930125	12	1	1	1	1	1	1	1	1	1	1	1	1
chr1	222921674	222923520	6	1	1	1	0	0	0	1	1	1	0	0	0
chr1	222903927	222906102	6	1	0	0	1	1	1	0	0	1	1	0	0
chr1	222886446	222889612	4	1	0	0	1	1	1	0	0	0	0	0	0
chr1	222849505	222856512	1	1	0	0	0	0	0	0	0	0	0	0	0
chr1	222841767	222847327	4	0	0	0	1	1	1	0	0	0	0	1	0
chr1	222465264	222465938	1	0	0	0	0	0	0	0	1	0	0	0	0
chr1	222454910	222455733	12	1	1	1	1	1	1	1	1	1	1	1	1
chr1	222386684	222391510	8	1	1	0	1	1	1	0	1	0	0	1	1
chr1	222368613	222371340	12	1	1	1	1	1	1	1	1	1	1	1	1
chr1	222326949	222327448	1	0	0	0	0	0	0	0	1	0	0	0	0
chr1	222304808	222308223	7	1	0	0	1	1	1	0	0	0	1	1	1
chr1	222239978	222241010	9	0	1	1	0	1	0	1	1	1	1	1	1
chr1	222230227	222230991	1	0	1	0	0	0	0	0	0	0	0	0	0
chr1	222038790	222042470	12	1	1	1	1	1	1	1	1	1	1	1	1
chr1	221886756	221887657	1	0	0	0	0	0	0	0	1	0	0	0	0
chr1	221868784	221869604	1	0	0	0	0	0	0	0	1	0	0	0	0
chr1	221732526	221736168	12	1	1	1	1	1	1	1	1	1	1	1	1
chr1	221727122	221730667	5	1	0	0	1	1	1	0	0	0	1	0	0
chr1	221723114	221725327	4	1	1	0	0	0	0	1	1	0	0	0	0
chr1	221612324	221612948	1	0	0	0	0	1	0	0	0	0	0	0	0
chr1	221457548	221459162	12	1	1	1	1	1	1	1	1	1	1	1	1
chr1	221433018	221436597	10	1	1	1	1	1	1	0	1	0	1	1	1
chr1	221263751	221265288	5	1	1	0	0	1	0	0	1	0	0	1	0
chr1	221250576	221251580	1	0	1	0	0	0	0	0	0	0	0	0	0
chr1	221246407	221247943	3	1	1	1	0	0	0	0	0	0	0	0	0
chr1	221202471	221204890	9	1	1	1	1	1	1	0	0	0	1	1	1
chr1	221200280	221201748	8	1	1	1	0	1	0	1	1	1	0	1	0
chr1	221192577	221193783	11	1	1	1	1	1	0	1	1	1	1	1	1
chr1	221135264	221136274	1	0	0	0	0	1	0	0	0	0	0	0	0
chr1	221117215	221119216	12	1	1	1	1	1	1	1	1	1	1	1	1
chr1	221099695	221102668	8	1	0	1	1	1	1	0	0	0	1	1	1
chr1	221031889	221033699	7	1	1	1	0	1	0	0	0	0	1	1	1
chr1	221029384	221030270	3	1	0	0	0	0	0	0	1	0	1	0	0
chr1	220980777	220983685	3	1	1	0	0	0	0	0	1	0	0	0	0
chr1	220925672	220926887	9	1	1	1	0	1	0	1	1	1	1	1	0
chr1	220904131	220906701	10	1	1	1	1	1	1	0	1	0	1	1	1
chr1	220893865	220896850	7	1	0	0	0	1	1	0	1	0	1	1	1
chr1	220873984	220874683	8	1	1	1	1	1	0	1	1	0	1	0	0
chr1	220843167	220844100	6	1	1	1	0	1	1	0	0	0	0	1	0
chr1	220826261	220828329	9	1	1	0	1	1	1	1	1	0	1	0	1
chr1	220796473	220796955	1	0	0	0	0	0	0	0	1	0	0	0	0
chr1	220784886	220788413	10	1	1	1	1	1	1	1	1	0	0	1	1
chr20	63815175	63815375	5	1	0	0	1	0	1	0	0	0	1	0	1
chr20	63815164	63816228	5	1	0	0	1	0	1	0	0	0	1	0	1
chr10	132888266	132888525	5	1	0	0	1	0	1	0	0	0	1	0	1
chr1	220779991	220780397	11	1	1	1	1	1	1	1	1	0	1	1	1
chr1	220775256	220777534	11	1	1	1	1	1	1	1	1	0	1	1	1
chr1	220690258	220692054	12	1	1	1	1	1	1	1	1	1	1	1	1
chr20	21366475	21366598	12	1	1	1	1	1	1	1	1	1	1	1	1
chr8	61203330	61203503	12	1	1	1	1	1	1	1	1	1	1	1	1
chr1	220634913	220636402	3	0	1	0	0	0	0	0	1	0	0	1	0
chr1	220280045	220283806	5	1	1	0	0	1	0	0	1	1	0	0	0
chr1	220219628	220222849	12	1	1	1	1	1	1	1	1	1	1	1	1
chr1	220193934	220198962	11	1	1	1	1	1	1	1	1	0	1	1	1
chr1	219957663	219959503	2	0	1	0	0	1	0	0	0	0	0	0	0
chr1	219910485	219911117	1	0	0	0	0	1	0	0	0	0	0	0	0
chr1	219897301	219898658	5	0	0	0	1	1	1	0	0	0	1	1	0
chr1	219835726	219836315	6	1	1	1	0	1	0	1	1	0	0	0	0
chr1	219806628	219807306	2	0	0	0	0	1	1	0	0	0	0	0	0
chr1	219790797	219791857	2	0	0	0	0	1	0	0	1	0	0	0	0
chr1	219669787	219671121	2	0	0	0	0	1	1	0	0	0	0	0	0
chr1	219658916	219662068	8	1	1	0	1	1	1	0	0	0	1	1	1
chr1	219656898	219658160	1	0	0	0	0	0	1	0	0	0	0	0	0
chr1	219587501	219588714	4	1	0	0	1	1	1	0	0	0	0	0	0
chr1	219578763	219580593	1	1	0	0	0	0	0	0	0	0	0	0	0
chr1	219549418	219550769	1	0	0	0	0	0	0	0	1	0	0	0	0
chr1	219538900	219539951	1	0	1	0	0	0	0	0	0	0	0	0	0
chr1	219505557	219506995	5	1	1	0	0	0	0	0	1	1	0	1	0
chr1	219495733	219498067	11	1	1	0	1	1	1	1	1	1	1	1	1
chr1	219477173	219479581	11	1	1	0	1	1	1	1	1	1	1	1	1
chr1	219468297	219469597	1	1	0	0	0	0	0	0	0	0	0	0	0
chr1	219427724	219428610	3	0	0	0	1	1	1	0	0	0	0	0	0
chr1	219404825	219406455	10	1	1	1	1	1	1	0	1	0	1	1	1
chr1	219359138	219360213	1	0	0	0	0	0	0	0	1	0	0	0	0
chr1	219304347	219304843	3	1	0	1	0	0	0	0	1	0	0	0	0
chr1	219294770	219297444	2	1	0	0	0	1	0	0	0	0	0	0	0
chr3	43016845	43017685	2	1	0	0	0	1	0	0	0	0	0	0	0
chr1	219272768	219273614	1	0	0	0	0	0	0	0	1	0	0	0	0
chr1	219260792	219269868	11	1	1	1	1	1	1	1	1	1	0	1	1
chr1	219245970	219248629	6	1	0	1	1	1	1	0	1	0	0	0	0
chr1	219086531	219087621	6	1	1	0	0	0	1	1	1	0	1	0	0
chr1	219075731	219076818	2	0	0	0	0	0	0	0	1	1	0	0	0
chr1	218897128	218898626	3	1	0	0	0	1	0	0	1	0	0	0	0
chr1	218890516	218891935	7	1	1	1	0	1	0	0	1	1	1	0	0
chr1	218852387	218857782	10	1	1	0	1	1	1	1	1	1	1	1	0
chr1	218808759	218810583	2	0	0	1	0	1	0	0	0	0	0	0	0
chr1	218785728	218787000	10	1	1	1	1	1	1	1	1	0	1	1	0
chr1	218771830	218772957	2	1	0	0	0	0	0	0	1	0	0	0	0
chr1	218740191	218740466	1	0	0	0	0	0	0	0	1	0	0	0	0
chr1	218712300	218713453	3	1	1	0	0	0	0	0	1	0	0	0	0
chr1	218701022	218702447	2	1	1	0	0	0	0	0	0	0	0	0	0
chr1	218664329	218665668	12	1	1	1	1	1	1	1	1	1	1	1	1
chr1	218656368	218657088	9	1	1	1	0	1	0	1	1	1	1	1	0
chr1	218620692	218621351	2	0	1	0	0	0	0	0	1	0	0	0	0
chr1	218584526	218586455	12	1	1	1	1	1	1	1	1	1	1	1	1
chr15	88901015	88901030	12	1	1	1	1	1	1	1	1	1	1	1	1
chr1	218567384	218569972	11	1	1	0	1	1	1	1	1	1	1	1	1
chr1	218556100	218558866	9	1	1	0	0	1	0	1	1	1	1	1	1
chr1	218542403	218544909	4	0	1	0	0	0	0	0	1	1	1	0	0
chr1	218524642	218526716	1	0	0	0	0	0	1	0	0	0	0	0	0
chr1	218474888	218476108	1	0	0	0	0	1	0	0	0	0	0	0	0
chr1	218459175	218461116	12	1	1	1	1	1	1	1	1	1	1	1	1
chr1	218433913	218436372	9	1	1	1	0	1	1	1	1	1	0	1	0
chr1	218389982	218391711	2	0	0	0	0	0	0	1	0	0	1	0	0
chr1	218374646	218381211	12	1	1	1	1	1	1	1	1	1	1	1	1
chr2	214846940	214847499	12	1	1	1	1	1	1	1	1	1	1	1	1
chr1	218356696	218358906	2	0	0	0	0	1	1	0	0	0	0	0	0
chr1	218351028	218352303	2	0	0	0	0	0	0	1	1	0	0	0	0
chr1	218349434	218350516	5	0	1	1	0	0	1	0	1	1	0	0	0
chr1	218330223	218332664	12	1	1	1	1	1	1	1	1	1	1	1	1
chr1	218163722	218166062	12	1	1	1	1	1	1	1	1	1	1	1	1
chr1	217939273	217940104	2	0	1	0	0	0	0	0	1	0	0	0	0
chr1	217881463	217881683	1	0	0	0	0	1	0	0	0	0	0	0	0
chr6	170091914	170092661	4	1	0	0	1	1	0	0	0	0	0	1	0
chr1	217615194	217617439	7	1	1	0	0	1	0	0	1	1	0	1	1
chr1	217564502	217566727	2	0	0	1	0	0	0	0	1	0	0	0	0
chr1	217498078	217499633	8	0	1	1	1	1	1	0	1	1	0	1	0
chr1	217474201	217475028	2	1	0	0	0	0	0	0	0	1	0	0	0
chr1	217425526	217426262	10	0	1	1	1	1	1	0	1	1	1	1	1
chr1	217333127	217335343	8	1	1	0	0	1	1	1	1	1	1	0	0
chr1	217275668	217276586	1	0	0	1	0	0	0	0	0	0	0	0	0
chr1	217133528	217142119	12	1	1	1	1	1	1	1	1	1	1	1	1
chr1	217075202	217080267	11	1	1	1	1	1	1	0	1	1	1	1	1
chr1	217041327	217043278	3	0	0	0	0	0	0	1	0	1	1	0	0
chr1	217027616	217030096	9	1	1	1	0	1	0	1	1	1	1	1	0
chr1	216996741	216998056	7	1	1	0	0	1	1	0	1	0	1	1	0
chr1	216992742	216994260	4	1	0	1	0	0	0	0	1	1	0	0	0
chr1	216929470	216930825	5	1	0	0	0	0	0	0	1	1	1	1	0
chr1	216922475	216924650	2	0	0	0	0	1	0	0	0	0	1	0	0
chr1	216812699	216814227	12	1	1	1	1	1	1	1	1	1	1	1	1
chr1	216782658	216784427	9	1	1	1	1	1	1	1	1	0	1	0	0
chr1	216749445	216750961	7	1	1	0	1	1	1	0	1	0	1	0	0
chr1	216712234	216713047	1	0	0	0	0	0	1	0	0	0	0	0	0
chr1	216700104	216701954	12	1	1	1	1	1	1	1	1	1	1	1	1
chr22	37308657	37308879	12	1	1	1	1	1	1	1	1	1	1	1	1
chr1	216600968	216601750	9	1	1	1	1	1	1	1	0	0	0	1	1
chr1	216498311	216498514	1	0	0	0	0	0	0	0	1	0	0	0	0
chr1	216326028	216326634	1	0	0	0	0	0	0	0	0	1	0	0	0
chr1	216313703	216315398	11	1	1	1	1	1	0	1	1	1	1	1	1
chr1	216182190	216184476	4	1	0	0	1	1	1	0	0	0	0	0	0
chr1	215887741	215893050	4	1	0	0	1	1	1	0	0	0	0	0	0
chr1	215827126	215829386	3	0	0	0	0	1	1	0	0	0	0	1	0
chr10	7358251	7358294	3	0	0	0	0	1	1	0	0	0	0	1	0
chr1	215764035	215764910	1	1	0	0	0	0	0	0	0	0	0	0	0
chr1	215744826	215750437	12	1	1	1	1	1	1	1	1	1	1	1	1
chr1	215682046	215682748	2	1	0	1	0	0	0	0	0	0	0	0	0
chr1	215665057	215665717	1	1	0	0	0	0	0	0	0	0	0	0	0
chr1	215656955	215658251	2	0	0	0	0	1	0	0	0	0	0	0	1
chr1	215649903	215650780	2	0	0	0	0	0	0	1	0	0	0	1	0
chr1	215647321	215647883	1	0	0	0	0	0	0	0	0	0	0	0	1
chr1	215606763	215607379	3	0	0	1	1	0	0	0	1	0	0	0	0
chr1	215526725	215527002	11	1	1	1	1	1	1	1	1	1	1	1	0
chr1	215475885	215476169	1	0	0	0	0	0	0	0	1	0	0	0	0
chr1	215424539	215425316	4	0	1	0	0	1	0	1	1	0	0	0	0
chr1	215368404	215368959	9	1	1	1	0	1	1	1	1	1	0	1	0
chr1	215228297	215231737	7	1	1	0	0	1	0	1	1	1	0	1	0
chr1	215146454	215147033	4	1	0	0	1	1	0	0	0	0	1	0	0
chr1	215126734	215127815	2	0	0	0	0	1	1	0	0	0	0	0	0
chr1	215068243	215069281	10	1	1	1	0	1	1	1	1	1	0	1	1
chr1	215002200	215003122	8	1	1	0	0	1	0	1	1	0	1	1	1
chr1	214932717	214937156	8	1	1	1	0	1	0	1	1	1	0	1	0
chr1	214906801	214906945	1	0	0	0	1	0	0	0	0	0	0	0	0
chr1	214846960	214847678	6	1	1	0	0	1	0	1	1	1	0	0	0
chr1	214694238	214695102	1	0	1	0	0	0	0	0	0	0	0	0	0
chr1	214570196	214575197	12	1	1	1	1	1	1	1	1	1	1	1	1
chr1	214557322	214558600	12	1	1	1	1	1	1	1	1	1	1	1	1
chr1	214546817	214548505	3	0	0	1	0	0	1	0	0	0	0	1	0
chr1	214514630	214519786	2	0	0	0	0	0	0	1	1	0	0	0	0
chr1	214506813	214507405	12	1	1	1	1	1	1	1	1	1	1	1	1
chr1	214445746	214452176	1	0	0	0	0	0	0	0	1	0	0	0	0
chr1	214415947	214419447	12	1	1	1	1	1	1	1	1	1	1	1	1
chr1	214380441	214385433	5	1	1	1	0	0	0	0	1	0	1	0	0
chr1	214371962	214373415	5	1	1	0	0	1	0	0	1	1	0	0	0
chr1	214361920	214362643	2	1	0	0	0	0	0	0	1	0	0	0	0
chr1	214326429	214338281	9	0	1	1	1	1	1	0	1	0	1	1	1
chr1	214295504	214308123	12	1	1	1	1	1	1	1	1	1	1	1	1
chr1	214271382	214272003	1	0	0	0	0	0	1	0	0	0	0	0	0
chr1	214213189	214214475	12	1	1	1	1	1	1	1	1	1	1	1	1
chr1	214153044	214156632	12	1	1	1	1	1	1	1	1	1	1	1	1
chr18	78159519	78159623	8	1	1	1	1	0	1	0	1	1	0	0	1
chr20	61051392	61051944	8	1	1	1	1	0	1	0	1	1	0	0	1
chr20	61051585	61051842	8	1	1	1	1	0	1	0	1	1	0	0	1
chr20	61051716	61051916	8	1	1	1	1	0	1	0	1	1	0	0	1
chr20	61051392	61051916	8	1	1	1	1	0	1	0	1	1	0	0	1
chr20	61051392	61051867	8	1	1	1	1	0	1	0	1	1	0	0	1
chr20	61051672	61051939	8	1	1	1	1	0	1	0	1	1	0	0	1
chr20	61051392	61051916	8	1	1	1	1	0	1	0	1	1	0	0	1
chr20	61051392	61051817	8	1	1	1	1	0	1	0	1	1	0	0	1
chr18	78159415	78159590	8	1	1	1	1	0	1	0	1	1	0	0	1
chr1	213816672	213818736	4	0	0	0	1	1	1	0	0	0	0	1	0
chr1	213811878	213814664	6	1	1	1	1	1	1	0	0	0	0	0	0
chr1	213723410	213725448	3	1	0	0	0	1	1	0	0	0	0	0	0
chr1	213622485	213623741	2	0	0	0	0	1	0	0	0	0	0	1	0
chr1	213381676	213382392	1	0	0	0	0	0	0	0	0	0	0	1	0
chr1	213327135	213328215	3	0	0	0	0	1	0	0	0	1	0	1	0
chr1	213262204	213264618	8	0	0	1	1	0	1	0	1	1	1	1	1
chr1	213242976	213245946	4	1	0	1	0	1	1	0	0	0	0	0	0
chr1	213177224	213180414	4	0	0	0	1	1	1	0	0	0	0	1	0
chr6	168334414	168334627	4	0	0	0	1	1	1	0	0	0	0	1	0
chr4	913886	915067	3	0	0	0	1	0	0	0	0	0	0	1	1
chr1	213122533	213123034	1	1	0	0	0	0	0	0	0	0	0	0	0
chr1	213075008	213077846	11	1	1	1	0	1	1	1	1	1	1	1	1
chr1	29727231	29727844	3	0	0	0	1	0	0	0	1	0	0	1	0
chr1	212994391	212997247	11	1	1	1	1	1	1	1	1	0	1	1	1
chr6	50707694	50707994	1	0	0	0	0	0	0	0	1	0	0	0	0
chr1	212909598	212909895	7	1	1	1	0	1	0	0	1	1	0	1	0
chr6	50720579	50721598	5	0	1	0	1	1	1	0	1	0	0	0	0
chr1	212687586	212690312	2	0	1	0	0	0	0	0	1	0	0	0	0
chr1	212664760	212667790	12	1	1	1	1	1	1	1	1	1	1	1	1
chr1	212628275	212631111	2	0	0	0	0	0	0	0	1	0	1	0	0
chr1	212611497	212614866	2	0	0	0	0	0	0	1	1	0	0	0	0
chr1	212595268	212597627	9	1	1	1	1	1	0	1	1	0	1	1	0
chr1	212569777	212569838	1	0	0	0	0	0	0	0	1	0	0	0	0
chr1	212564467	212567425	12	1	1	1	1	1	1	1	1	1	1	1	1
chr1	212561077	212563106	12	1	1	1	1	1	1	1	1	1	1	1	1
chr1	212527535	212532032	12	1	1	1	1	1	1	1	1	1	1	1	1
chr1	212507044	212511120	11	1	1	0	1	1	1	1	1	1	1	1	1
chr1	212498252	212500330	9	1	1	1	0	1	0	1	1	1	1	0	1
chr1	212488021	212492004	12	1	1	1	1	1	1	1	1	1	1	1	1
chrX	136231588	136231896	12	1	1	1	1	1	1	1	1	1	1	1	1
chr1	212469781	212470670	12	1	1	1	1	1	1	1	1	1	1	1	1
chr4	186547347	186547469	12	1	1	1	1	1	1	1	1	1	1	1	1
chr1	212455254	212462865	12	1	1	1	1	1	1	1	1	1	1	1	1
chr1	212358655	212361841	5	1	0	0	1	1	1	0	0	0	1	0	0
chr1	212333558	212338108	6	1	1	0	1	1	1	0	0	0	1	0	0
chr1	212259549	212263212	9	1	1	0	1	1	0	0	1	1	1	1	1
chr1	212205556	212208468	4	1	0	1	0	1	1	0	0	0	0	0	0
chr1	212203230	212203545	3	0	0	0	1	0	0	0	0	0	0	1	1
chr1	212128466	212132077	7	1	1	1	1	1	1	0	0	0	1	0	0
chr1	211903569	211904799	2	0	0	0	0	0	0	0	1	0	0	1	0
chr1	211891647	211895631	12	1	1	1	1	1	1	1	1	1	1	1	1
chr1	211885656	211888050	12	1	1	1	1	1	1	1	1	1	1	1	1
chr1	211762923	211766248	1	0	0	0	0	1	0	0	0	0	0	0	0
chr6	50791331	50792129	5	1	1	0	0	0	0	0	1	1	0	1	0
chr1	211654418	211655059	12	1	1	1	1	1	1	1	1	1	1	1	1
chr1	211647963	211648788	1	0	1	0	0	0	0	0	0	0	0	0	0
chr16	2857009	2857476	1	0	0	0	0	0	0	0	0	0	0	1	0
chr1	211591843	211593568	5	1	1	1	0	1	0	0	0	0	0	0	1
chr1	211547584	211549977	2	1	0	0	1	0	0	0	0	0	0	0	0
chr1	211513912	211518428	12	1	1	1	1	1	1	1	1	1	1	1	1
chr1	211491011	211493382	9	1	1	0	1	1	0	1	1	1	0	1	1
chr1	211481910	211490755	5	0	1	0	0	1	1	0	1	0	1	0	0
chr8	80644467	80645212	3	1	0	0	0	0	0	1	1	0	0	0	0
chr6	50815039	50817758	12	1	1	1	1	1	1	1	1	1	1	1	1
chr1	211355882	211357296	8	1	1	1	1	1	0	1	1	0	0	0	1
chr1	211347494	211353916	12	1	1	1	1	1	1	1	1	1	1	1	1
chr11	67584112	67586650	12	1	1	1	1	1	1	1	1	1	1	1	1
chr6	50818205	50831971	12	1	1	1	1	1	1	1	1	1	1	1	1
chr11	71361868	71363365	11	1	1	1	1	1	1	0	1	1	1	1	1
chr6	50839585	50846961	12	1	1	1	1	1	1	1	1	1	1	1	1
chr1	210949988	210951721	1	1	0	0	0	0	0	0	0	0	0	0	0
chr1	210821995	210829785	12	1	1	1	1	1	1	1	1	1	1	1	1
chr6	50848917	50851885	12	1	1	1	1	1	1	1	1	1	1	1	1
chr1	210814687	210817715	9	1	1	0	0	1	1	0	1	1	1	1	1
chr1	210754809	210756732	1	1	0	0	0	0	0	0	0	0	0	0	0
chr1	210742871	210743482	3	0	0	0	1	0	0	0	1	0	0	0	1
chr1	210739386	210740419	2	0	1	0	0	0	0	0	0	0	0	0	1
chr1	210662397	210665305	1	0	0	0	0	0	0	0	0	0	1	0	0
chr1	210583422	210584839	8	1	1	1	1	1	1	0	1	0	0	1	0
chr1	210533758	210536830	6	0	0	0	1	1	1	0	0	0	1	1	1
chr1	210406216	210407602	1	0	0	0	0	0	1	0	0	0	0	0	0
chr1	210399977	210404705	12	1	1	1	1	1	1	1	1	1	1	1	1
chr1	210397219	210398987	12	1	1	1	1	1	1	1	1	1	1	1	1
chr1	210393300	210395846	12	1	1	1	1	1	1	1	1	1	1	1	1
chr1	210364167	210377375	11	1	1	1	1	1	1	1	1	0	1	1	1
chr1	210355763	210357288	2	0	0	0	0	1	0	0	0	0	0	1	0
chr1	210313520	210314312	2	0	0	0	0	0	0	0	1	0	0	1	0
chr1	210311888	210312493	2	0	0	0	0	0	0	1	1	0	0	0	0
chr1	210307724	210311721	11	1	1	1	1	1	1	1	1	1	0	1	1
chr1	210299173	210301240	5	1	0	1	1	1	0	0	0	0	1	0	0
chr1	210290892	210296116	12	1	1	1	1	1	1	1	1	1	1	1	1
chr17	77215895	77216284	12	1	1	1	1	1	1	1	1	1	1	1	1
chr1	210261167	210263682	12	1	1	1	1	1	1	1	1	1	1	1	1
chr1	210222174	210224542	3	1	0	0	0	1	1	0	0	0	0	0	0
chr1	209900564	209900835	2	0	0	0	1	0	0	0	1	0	0	0	0
chr1	209882673	209885119	6	1	0	0	1	1	1	0	1	0	1	0	0
chr1	209879161	209882670	11	1	1	1	1	1	1	0	1	1	1	1	1
[truncated: 45,095 more rows]
