# Supplementary material for: Complex genetic architecture underlies human hand and foot evolution
Source: Research Square preprint supplement (doi:10.21203/rs.3.rs-7124496/v1), 2025-08-18
Supplement: Supplementary file 5 [file 8ca3b73741ee5a24ea24fc16.xlsx]

## Sheet: Samples and Sequencing Info
Sample	Rep	Sample ID	Sex	Date of Sample Collection	Sample	Index	Sequencing Submission #	Sequencing ID	Platform	Read Length	Sequencing Lane	Reads	# Reads/Sample	% Bases >= Q30	Barcode Primer	Description	Peak Calls
E72 Human	Late Rep 1	H29067	Male	2022-05-13	Metatarsal 1	CGAGGCTG	SUB12997	220805_A00794_0667_AHWWFKDSX3_SUB12997 (Lane 1)	NovaSeq S4	2x100bp	1	72884480	72884480	91.34	AGATCGGAAGAGCACACGTCTGAACTCCAGTCA	ATAC-seq on Human E72 skeletal tissue	158756
					Metatarsal 2	GCTACGCT	SUB12997	220805_A00794_0667_AHWWFKDSX3_SUB12997 (Lane 1)	NovaSeq S4	2x100bp	1	108237385	108237385	91.64	AGATCGGAAGAGCACACGTCTGAACTCCAGTCA	ATAC-seq on Human E72 skeletal tissue	221947
					Metatarsal 3	CAGAGAGG	SUB12997	220805_A00794_0667_AHWWFKDSX3_SUB12997 (Lane 1)	NovaSeq S4	2x100bp	1	63068471	63068471	91.04	AGATCGGAAGAGCACACGTCTGAACTCCAGTCA	ATAC-seq on Human E72 skeletal tissue	163562
					Metatarsal 4	CTCTCTAC	SUB12997	220805_A00794_0667_AHWWFKDSX3_SUB12997 (Lane 1)	NovaSeq S4	2x100bp	1	90701003	90701003	91.2	AGATCGGAAGAGCACACGTCTGAACTCCAGTCA	ATAC-seq on Human E72 skeletal tissue	172396
					Metatarsal 5	TAGGCATG	SUB12997	220805_A00794_0667_AHWWFKDSX3_SUB12997 (Lane 1)	NovaSeq S4	2x100bp	1	38245057	38245057	91.02	AGATCGGAAGAGCACACGTCTGAACTCCAGTCA	ATAC-seq on Human E72 skeletal tissue	166379
					Foot phalanges 1	TGGATCTG	SUB12997	220805_A00794_0667_AHWWFKDSX3_SUB12997 (Lane 1)	NovaSeq S4	2x100bp	1	37927965	96570568	90.73	AGATCGGAAGAGCACACGTCTGAACTCCAGTCA	ATAC-seq on Human E72 skeletal tissue	266753
							SUB13574	221222_A00794_0761_AHHTVMDSX5_SUB13574	NovaSeq S4	2x100bp	1	58642603		91.61	AGATCGGAAGAGCACACGTCTGAACTCCAGTCA	ATAC-seq on Human E72 skeletal tissue
					Foot phalanges 2	ACCACTGT	SUB12997	220805_A00794_0667_AHWWFKDSX3_SUB12997 (Lane 1)	NovaSeq S4	2x100bp	1	36045310	111104892	92	AGATCGGAAGAGCACACGTCTGAACTCCAGTCA	ATAC-seq on Human E72 skeletal tissue	473758
							SUB13574	221222_A00794_0761_AHHTVMDSX5_SUB13574	NovaSeq S4	2x100bp	1	75059582		92.33	AGATCGGAAGAGCACACGTCTGAACTCCAGTCA	ATAC-seq on Human E72 skeletal tissue
					Foot phalanges 3	GTCGTGAT	SUB12997	220805_A00794_0667_AHWWFKDSX3_SUB12997 (Lane 1)	NovaSeq S4	2x100bp	1	48764771	48764771	92.24	AGATCGGAAGAGCACACGTCTGAACTCCAGTCA	ATAC-seq on Human E72 skeletal tissue	161723
					Foot phalanges 4	GTAGAGGA	SUB12997	220805_A00794_0667_AHWWFKDSX3_SUB12997 (Lane 1)	NovaSeq S4	2x100bp	1	36913428	91449024	87.97	AGATCGGAAGAGCACACGTCTGAACTCCAGTCA	ATAC-seq on Human E72 skeletal tissue	189267
							SUB13574	221222_A00794_0761_AHHTVMDSX5_SUB13574	NovaSeq S4	2x100bp	1	54535596		89.72	AGATCGGAAGAGCACACGTCTGAACTCCAGTCA	ATAC-seq on Human E72 skeletal tissue
					Foot phalanges 5	AAGAGGCA	SUB12997	220805_A00794_0667_AHWWFKDSX3_SUB12997 (Lane 1)	NovaSeq S4	2x100bp	1	80653606	80653606	90.34	AGATCGGAAGAGCACACGTCTGAACTCCAGTCA	ATAC-seq on Human E72 skeletal tissue	155474
					Metacarpal 1	GGACTCCT	SUB12997	220805_A00794_0667_AHWWFKDSX3_SUB12997 (Lane 1)	NovaSeq S4	2x100bp	1	132169836	132169836	91.76	AGATCGGAAGAGCACACGTCTGAACTCCAGTCA	ATAC-seq on Human E72 skeletal tissue	180155
					Metacarpal 2	TCCTGAGC	SUB12997	220805_A00794_0667_AHWWFKDSX3_SUB12997 (Lane 1)	NovaSeq S4	2x100bp	1	58847535	58847535	90.87	AGATCGGAAGAGCACACGTCTGAACTCCAGTCA	ATAC-seq on Human E72 skeletal tissue	144974
					Metacarpal 4	CGTACTAG	SUB12997	220805_A00794_0667_AHWWFKDSX3_SUB12997 (Lane 1)	NovaSeq S4	2x100bp	1	74844637	74844637	91.65	AGATCGGAAGAGCACACGTCTGAACTCCAGTCA	ATAC-seq on Human E72 skeletal tissue	145700
					Metacarpal 5	TAAGGCGA	SUB12997	220805_A00794_0667_AHWWFKDSX3_SUB12997 (Lane 1)	NovaSeq S4	2x100bp	1	71254861	71254861	90.8	AGATCGGAAGAGCACACGTCTGAACTCCAGTCA	ATAC-seq on Human E72 skeletal tissue	148483
					Hand phalanges 1	GTGTGGTG	SUB12997	220805_A00794_0667_AHWWFKDSX3_SUB12997 (Lane 1)	NovaSeq S4	2x100bp	1	42007399	42007399	90.85	AGATCGGAAGAGCACACGTCTGAACTCCAGTCA	ATAC-seq on Human E72 skeletal tissue	111464
					Hand phalanges 2	AGGTTGGG	SUB12997	220805_A00794_0667_AHWWFKDSX3_SUB12997 (Lane 1)	NovaSeq S4	2x100bp	1	59484025	59484025	90.23	AGATCGGAAGAGCACACGTCTGAACTCCAGTCA	ATAC-seq on Human E72 skeletal tissue	112149
					Hand phalanges 3	GAGGGGTT	SUB12997	220805_A00794_0667_AHWWFKDSX3_SUB12997 (Lane 1)	NovaSeq S4	2x100bp	1	19302323	62758904	90.64	AGATCGGAAGAGCACACGTCTGAACTCCAGTCA	ATAC-seq on Human E72 skeletal tissue	128920
							SUB13574	221222_A00794_0761_AHHTVMDSX5_SUB13574	NovaSeq S4	2x100bp	1	43456581		91.63	AGATCGGAAGAGCACACGTCTGAACTCCAGTCA	ATAC-seq on Human E72 skeletal tissue
					Hand phalanges 4	TGCTGGGT	SUB12997	220805_A00794_0667_AHWWFKDSX3_SUB12997 (Lane 1)	NovaSeq S4	2x100bp	1	62671007	62671007	90.65	AGATCGGAAGAGCACACGTCTGAACTCCAGTCA	ATAC-seq on Human E72 skeletal tissue	172149
					Hand phalanges 5	CCGTTTGT	SUB12997	220805_A00794_0667_AHWWFKDSX3_SUB12997 (Lane 1)	NovaSeq S4	2x100bp	1	30837487	79953927	92.64	AGATCGGAAGAGCACACGTCTGAACTCCAGTCA	ATAC-seq on Human E72 skeletal tissue	232184
							SUB13574	221222_A00794_0761_AHHTVMDSX5_SUB13574	NovaSeq S4	2x100bp	1	49116440		93.35	AGATCGGAAGAGCACACGTCTGAACTCCAGTCA	ATAC-seq on Human E72 skeletal tissue
E72 Human	Late Rep 2	H29042	Male	2022-04-20	Metatarsal 1	AAGAGGCA	SUB12997	220812_A00794_0673_AHM2KVDSX3_SUB12997_updated	NovaSeq S4	2x100bp	1	82305674	82305674	90.07	AGATCGGAAGAGCACACGTCTGAACTCCAGTCA	ATAC-seq on Human E72 skeletal tissue	208714
					Metatarsal 2	GTAGAGGA	SUB12997	220812_A00794_0673_AHM2KVDSX3_SUB12997_updated	NovaSeq S4	2x100bp	1	42230738	42230738	88.2	AGATCGGAAGAGCACACGTCTGAACTCCAGTCA	ATAC-seq on Human E72 skeletal tissue	167305
					Metatarsal 3	GTCGTGAT	SUB12997	220812_A00794_0673_AHM2KVDSX3_SUB12997_updated	NovaSeq S4	2x100bp	1	62961747	62961747	91.75	AGATCGGAAGAGCACACGTCTGAACTCCAGTCA	ATAC-seq on Human E72 skeletal tissue	271953
					Metatarsal 4	ACCACTGT	SUB12997	220812_A00794_0673_AHM2KVDSX3_SUB12997_updated	NovaSeq S4	2x100bp	1	67418490	67418490	90.91	AGATCGGAAGAGCACACGTCTGAACTCCAGTCA	ATAC-seq on Human E72 skeletal tissue	233635
					Metatarsal 5	TGGATCTG	SUB12997	220812_A00794_0673_AHM2KVDSX3_SUB12997_updated	NovaSeq S4	2x100bp	1	112282735	112282735	89.97	AGATCGGAAGAGCACACGTCTGAACTCCAGTCA	ATAC-seq on Human E72 skeletal tissue	211706
					Foot phalanges 1	TAGGCATG	SUB12997	220812_A00794_0673_AHM2KVDSX3_SUB12997_updated	NovaSeq S4	2x100bp	1	62329258	62329258	90.31	AGATCGGAAGAGCACACGTCTGAACTCCAGTCA	ATAC-seq on Human E72 skeletal tissue	178266
					Foot phalanges 2	CTCTCTAC	SUB12997	220812_A00794_0673_AHM2KVDSX3_SUB12997_updated	NovaSeq S4	2x100bp	1	35982973	92764236	90.66	AGATCGGAAGAGCACACGTCTGAACTCCAGTCA	ATAC-seq on Human E72 skeletal tissue	290849
							SUB13550	221129_A00794_0742_AHGWKNDSX5_SUB13550	NovaSeq S4	2x100bp	4	56781263		90.75	AGATCGGAAGAGCACACGTCTGAACTCCAGTCA	ATAC-seq on Human E72 skeletal tissue
					Foot phalanges 3	CAGAGAGG	SUB12997	220812_A00794_0673_AHM2KVDSX3_SUB12997_updated	NovaSeq S4	2x100bp	1	48863590	48863590	90.94	AGATCGGAAGAGCACACGTCTGAACTCCAGTCA	ATAC-seq on Human E72 skeletal tissue	288034
					Foot phalanges 4	GCTACGCT	SUB12997	220812_A00794_0673_AHM2KVDSX3_SUB12997_updated	NovaSeq S4	2x100bp	1	53780800	53780800	92.05	AGATCGGAAGAGCACACGTCTGAACTCCAGTCA	ATAC-seq on Human E72 skeletal tissue	245035
					Foot phalanges 5	CGAGGCTG	SUB12997	220812_A00794_0673_AHM2KVDSX3_SUB12997_updated	NovaSeq S4	2x100bp	1	61881595	61881595	90.65	AGATCGGAAGAGCACACGTCTGAACTCCAGTCA	ATAC-seq on Human E72 skeletal tissue	125469
					Metacarpal 1	CCGTTTGT	SUB12997	220812_A00794_0673_AHM2KVDSX3_SUB12997_updated	NovaSeq S4	2x100bp	1	79474712	79474712	91.08	AGATCGGAAGAGCACACGTCTGAACTCCAGTCA	ATAC-seq on Human E72 skeletal tissue	148446
					Metacarpal 2	TGCTGGGT	SUB12997	220812_A00794_0673_AHM2KVDSX3_SUB12997_updated	NovaSeq S4	2x100bp	1	111032763	111032763	89.56	AGATCGGAAGAGCACACGTCTGAACTCCAGTCA	ATAC-seq on Human E72 skeletal tissue	203541
					Metacarpal 3	GAGGGGTT	SUB12997	220812_A00794_0673_AHM2KVDSX3_SUB12997_updated	NovaSeq S4	2x100bp	1	116869937	116869937	89.04	AGATCGGAAGAGCACACGTCTGAACTCCAGTCA	ATAC-seq on Human E72 skeletal tissue	185065
					Metacarpal 4	AGGTTGGG	SUB12997	220812_A00794_0673_AHM2KVDSX3_SUB12997_updated	NovaSeq S4	2x100bp	1	46393559	46393559	90.54	AGATCGGAAGAGCACACGTCTGAACTCCAGTCA	ATAC-seq on Human E72 skeletal tissue	258133
					Metacarpal 5	GTGTGGTG	SUB12997	220812_A00794_0673_AHM2KVDSX3_SUB12997_updated	NovaSeq S4	2x100bp	1	41027371	41027371	91.72	AGATCGGAAGAGCACACGTCTGAACTCCAGTCA	ATAC-seq on Human E72 skeletal tissue	191700
					Hand phalanges 1	TAAGGCGA	SUB12997	220812_A00794_0673_AHM2KVDSX3_SUB12997_updated	NovaSeq S4	2x100bp	1	84873384	84873384	90.11	AGATCGGAAGAGCACACGTCTGAACTCCAGTCA	ATAC-seq on Human E72 skeletal tissue	170821
					Hand phalanges 2	CGTACTAG	SUB12997	220812_A00794_0673_AHM2KVDSX3_SUB12997_updated	NovaSeq S4	2x100bp	1	41168654	41168654	91.68	AGATCGGAAGAGCACACGTCTGAACTCCAGTCA	ATAC-seq on Human E72 skeletal tissue	150394
					Hand phalanges 3	AGGCAGAA	SUB12997	220812_A00794_0673_AHM2KVDSX3_SUB12997_updated	NovaSeq S4	2x100bp	1	90326513	90326513	90.94	AGATCGGAAGAGCACACGTCTGAACTCCAGTCA	ATAC-seq on Human E72 skeletal tissue	177444
					Hand phalanges 4	TCCTGAGC	SUB12997	220812_A00794_0673_AHM2KVDSX3_SUB12997_updated	NovaSeq S4	2x100bp	1	61489268	61489268	90.95	AGATCGGAAGAGCACACGTCTGAACTCCAGTCA	ATAC-seq on Human E72 skeletal tissue	156679
					Hand phalanges 5	GGACTCCT	SUB12997	220812_A00794_0673_AHM2KVDSX3_SUB12997_updated	NovaSeq S4	2x100bp	1	53633883	53633883	92.8	AGATCGGAAGAGCACACGTCTGAACTCCAGTCA	ATAC-seq on Human E72 skeletal tissue	147918
E67	Late Rep 3	H28680	Male	2020-01-28	Metatarsal 1	AAGAGGCA	SUB12606	220902_A00794_0684_BH25W7DSX5_SUB12606_single_index	NovaSeq S4	2x100bp	4	150887652	150887652	91.88	AGATCGGAAGAGCACACGTCTGAACTCCAGTCA	ATAC-seq on Human E67 skeletal tissue	245452
					Metatarsal 2	GTAGAGGA	SUB12606	220902_A00794_0684_BH25W7DSX5_SUB12606_single_index	NovaSeq S4	2x100bp	4	127162972	127162972	91.79	AGATCGGAAGAGCACACGTCTGAACTCCAGTCA	ATAC-seq on Human E67 skeletal tissue	384818
					Metatarsal 3	GTCGTGAT	SUB12606	220902_A00794_0684_BH25W7DSX5_SUB12606_single_index	NovaSeq S4	2x100bp	4	94124020	94124020	92.24	AGATCGGAAGAGCACACGTCTGAACTCCAGTCA	ATAC-seq on Human E67 skeletal tissue	213043
					Metatarsal 4	ACCACTGT	SUB12606	220902_A00794_0684_BH25W7DSX5_SUB12606_single_index	NovaSeq S4	2x100bp	4	110256878	110256878	91.98	AGATCGGAAGAGCACACGTCTGAACTCCAGTCA	ATAC-seq on Human E67 skeletal tissue	230779
					Metatarsal 5	TGGATCTG	SUB12606	220902_A00794_0684_BH25W7DSX5_SUB12606_single_index	NovaSeq S4	2x100bp	4	72383467	72383467	91.8	AGATCGGAAGAGCACACGTCTGAACTCCAGTCA	ATAC-seq on Human E67 skeletal tissue	186282
					Foot phalanges 1	TAAGGCGA	SUB12606	220902_A00794_0684_BH25W7DSX5_SUB12606_single_index	NovaSeq S4	2x100bp	4	106008645	106008645	91.08	AGATCGGAAGAGCACACGTCTGAACTCCAGTCA	ATAC-seq on Human E67 skeletal tissue	169516
					Foot phalanges 2	CGTACTAG	SUB12606	220902_A00794_0684_BH25W7DSX5_SUB12606_single_index	NovaSeq S4	2x100bp	4	55102167	55102167	92.32	AGATCGGAAGAGCACACGTCTGAACTCCAGTCA	ATAC-seq on Human E67 skeletal tissue	170477
					Foot phalanges 3	AGGCAGAA	SUB12606	220902_A00794_0684_BH25W7DSX5_SUB12606_single_index	NovaSeq S4	2x100bp	4	97255426	97255426	91.32	AGATCGGAAGAGCACACGTCTGAACTCCAGTCA	ATAC-seq on Human E67 skeletal tissue	205168
					Foot phalanges 4	TCCTGAGC	SUB12606	220902_A00794_0684_BH25W7DSX5_SUB12606_single_index	NovaSeq S4	2x100bp	4	56443520	56443520	91.81	AGATCGGAAGAGCACACGTCTGAACTCCAGTCA	ATAC-seq on Human E67 skeletal tissue	140192
					Foot phalanges 5	GGACTCCT	SUB12606	220902_A00794_0684_BH25W7DSX5_SUB12606_single_index	NovaSeq S4	2x100bp	4	80557592	80557592	92.17	AGATCGGAAGAGCACACGTCTGAACTCCAGTCA	ATAC-seq on Human E67 skeletal tissue	307167
					Metacarpal 1	CCGTTTGT	SUB12606	220902_A00794_0684_BH25W7DSX5_SUB12606_single_index	NovaSeq S4	2x100bp	4	250320244	250320244	92.06	AGATCGGAAGAGCACACGTCTGAACTCCAGTCA	ATAC-seq on Human E67 skeletal tissue	379233
					Metacarpal 2	TGCTGGGT	SUB12606	220902_A00794_0684_BH25W7DSX5_SUB12606_single_index	NovaSeq S4	2x100bp	4	81054342	81054342	91.76	AGATCGGAAGAGCACACGTCTGAACTCCAGTCA	ATAC-seq on Human E67 skeletal tissue	206163
					Metacarpal 3	GAGGGGTT	SUB12606	220902_A00794_0684_BH25W7DSX5_SUB12606_single_index	NovaSeq S4	2x100bp	4	130549158	130549158	90.9	AGATCGGAAGAGCACACGTCTGAACTCCAGTCA	ATAC-seq on Human E67 skeletal tissue	244505
					Metacarpal 4	AGGTTGGG	SUB12606	220902_A00794_0684_BH25W7DSX5_SUB12606_single_index	NovaSeq S4	2x100bp	4	61649371	61649371	91.68	AGATCGGAAGAGCACACGTCTGAACTCCAGTCA	ATAC-seq on Human E67 skeletal tissue	157370
					Metacarpal 5	GTGTGGTG	SUB12606	220902_A00794_0684_BH25W7DSX5_SUB12606_single_index	NovaSeq S4	2x100bp	4	98463036	98463036	90.92	AGATCGGAAGAGCACACGTCTGAACTCCAGTCA	ATAC-seq on Human E67 skeletal tissue	205431
					Hand phalanges 1	TAGGCATG	SUB12606	220902_A00794_0684_BH25W7DSX5_SUB12606_single_index	NovaSeq S4	2x100bp	4	89113486	89113486	91.57	AGATCGGAAGAGCACACGTCTGAACTCCAGTCA	ATAC-seq on Human E67 skeletal tissue	154523
					Hand phalanges 2	CTCTCTAC	SUB12606	220902_A00794_0684_BH25W7DSX5_SUB12606_single_index	NovaSeq S4	2x100bp	4	74094226	74094226	92.34	AGATCGGAAGAGCACACGTCTGAACTCCAGTCA	ATAC-seq on Human E67 skeletal tissue	168213
					Hand phalanges 3	CAGAGAGG	SUB12606	220902_A00794_0684_BH25W7DSX5_SUB12606_single_index	NovaSeq S4	2x100bp	4	80690196	80690196	92.31	AGATCGGAAGAGCACACGTCTGAACTCCAGTCA	ATAC-seq on Human E67 skeletal tissue	162413
					Hand phalanges 4	GCTACGCT	SUB12606	220902_A00794_0684_BH25W7DSX5_SUB12606_single_index	NovaSeq S4	2x100bp	4	54577274	54577274	92.09	AGATCGGAAGAGCACACGTCTGAACTCCAGTCA	ATAC-seq on Human E67 skeletal tissue	168193
					Hand phalanges 5	CGAGGCTG	SUB12606	220902_A00794_0684_BH25W7DSX5_SUB12606_single_index	NovaSeq S4	2x100bp	4	89093826	89093826	92.21	AGATCGGAAGAGCACACGTCTGAACTCCAGTCA	ATAC-seq on Human E67 skeletal tissue	181423
E53	Early Rep 1	H28723	Male	2021-03-03	Metatarsal 1	TAGGCATG	SUB12606	220913_A00794_0694_BH53HFDSX5_SUB12606_new	NovaSeq S4	2x100bp	2	83485417	83485417	90.14	AGATCGGAAGAGCACACGTCTGAACTCCAGTCA	ATAC-seq on Human E53 skeletal tissue	383154		RERUN CAREFULLY
					Metatarsal 2	CTCTCTAC	SUB12606	220913_A00794_0694_BH53HFDSX5_SUB12606_new	NovaSeq S4	2x100bp	2	113189467	113189467	89.64	AGATCGGAAGAGCACACGTCTGAACTCCAGTCA	ATAC-seq on Human E53 skeletal tissue	274567
					Metatarsal 3	CAGAGAGG	SUB12606	220913_A00794_0694_BH53HFDSX5_SUB12606_new	NovaSeq S4	2x100bp	2	120017999	120017999	90.52	AGATCGGAAGAGCACACGTCTGAACTCCAGTCA	ATAC-seq on Human E53 skeletal tissue	248670
					Metatarsal 4	GCTACGCT	SUB12606	220913_A00794_0694_BH53HFDSX5_SUB12606_new	NovaSeq S4	2x100bp	2	152290920	152290920	90.1	AGATCGGAAGAGCACACGTCTGAACTCCAGTCA	ATAC-seq on Human E53 skeletal tissue
					Metatarsal 5	CGAGGCTG	SUB12606	220913_A00794_0694_BH53HFDSX5_SUB12606_new	NovaSeq S4	2x100bp	2	125885122	125885122	90.55	AGATCGGAAGAGCACACGTCTGAACTCCAGTCA	ATAC-seq on Human E53 skeletal tissue	439833
					Foot phalanges 1	TAAGGCGA	SUB12606	220913_A00794_0694_BH53HFDSX5_SUB12606_new	NovaSeq S4	2x100bp	2	76294373	76294373	89.55	AGATCGGAAGAGCACACGTCTGAACTCCAGTCA	ATAC-seq on Human E53 skeletal tissue	255676
					Foot phalanges 2	CGTACTAG	SUB12606	220913_A00794_0694_BH53HFDSX5_SUB12606_new	NovaSeq S4	2x100bp	2	109045766	109045766	89.88	AGATCGGAAGAGCACACGTCTGAACTCCAGTCA	ATAC-seq on Human E53 skeletal tissue	240883
					Foot phalanges 3	AGGCAGAA	SUB12606	220913_A00794_0694_BH53HFDSX5_SUB12606_new	NovaSeq S4	2x100bp	2	127398455	127398455	90.65	AGATCGGAAGAGCACACGTCTGAACTCCAGTCA	ATAC-seq on Human E53 skeletal tissue	203041
					Foot phalanges 4	TCCTGAGC	SUB12606	220913_A00794_0694_BH53HFDSX5_SUB12606_new	NovaSeq S4	2x100bp	2	42618326	42618326	90.09	AGATCGGAAGAGCACACGTCTGAACTCCAGTCA	ATAC-seq on Human E53 skeletal tissue	391306
					Foot phalanges 5	GGACTCCT	SUB12606	220913_A00794_0694_BH53HFDSX5_SUB12606_new	NovaSeq S4	2x100bp	2	139938659	139938659	90.92	AGATCGGAAGAGCACACGTCTGAACTCCAGTCA	ATAC-seq on Human E53 skeletal tissue	285508
					Metacarpal 1	AAGAGGCA	SUB12606	220913_A00794_0694_BH53HFDSX5_SUB12606_new	NovaSeq S4	2x100bp	2	96720446	96720446	90.77	AGATCGGAAGAGCACACGTCTGAACTCCAGTCA	ATAC-seq on Human E53 skeletal tissue	219441
					Metacarpal 2	GTAGAGGA	SUB12606	220913_A00794_0694_BH53HFDSX5_SUB12606_new	NovaSeq S4	2x100bp	2	93117624	93117624	87.67	AGATCGGAAGAGCACACGTCTGAACTCCAGTCA	ATAC-seq on Human E53 skeletal tissue
					Metacarpal 3	GTCGTGAT	SUB12606	220913_A00794_0694_BH53HFDSX5_SUB12606_new	NovaSeq S4	2x100bp	2	113534426	113534426	90.46	AGATCGGAAGAGCACACGTCTGAACTCCAGTCA	ATAC-seq on Human E53 skeletal tissue	150334
					Metacarpal 4	ACCACTGT	SUB12606	220913_A00794_0694_BH53HFDSX5_SUB12606_new	NovaSeq S4	2x100bp	2	4191993	118791860	92.13	AGATCGGAAGAGCACACGTCTGAACTCCAGTCA	ATAC-seq on Human E53 skeletal tissue	141244
							SUB13550	221129_A00794_0742_AHGWKNDSX5_SUB13550	NovaSeq S4	2x100bp	4	114599867		92.46	AGATCGGAAGAGCACACGTCTGAACTCCAGTCA	ATAC-seq on Human E53 skeletal tissue
					Metacarpal 5	TGGATCTG	SUB12606	220913_A00794_0694_BH53HFDSX5_SUB12606_new	NovaSeq S4	2x100bp	2	131608445	131608445	89.99	AGATCGGAAGAGCACACGTCTGAACTCCAGTCA	ATAC-seq on Human E53 skeletal tissue	434386
					Hand phalanges 1	CCGTTTGT	SUB12606	220913_A00794_0694_BH53HFDSX5_SUB12606_new	NovaSeq S4	2x100bp	2	111413491	111413491	90.86	AGATCGGAAGAGCACACGTCTGAACTCCAGTCA	ATAC-seq on Human E53 skeletal tissue	178000
					Hand phalanges 2		SUB12606	220913_A00794_0694_BH53HFDSX5_SUB12606_new	NovaSeq S4	2x100bp	2				AGATCGGAAGAGCACACGTCTGAACTCCAGTCA	ATAC-seq on Human E53 skeletal tissue	Sample collection failed
					Hand phalanges 3	GAGGGGTT	SUB12606	220913_A00794_0694_BH53HFDSX5_SUB12606_new	NovaSeq S4	2x100bp	2	81221422	81221422	89.16	AGATCGGAAGAGCACACGTCTGAACTCCAGTCA	ATAC-seq on Human E53 skeletal tissue	202917
					Hand phalanges 4	AGGTTGGG	SUB12606	220913_A00794_0694_BH53HFDSX5_SUB12606_new	NovaSeq S4	2x100bp	2	47521858	47521858	90.73	AGATCGGAAGAGCACACGTCTGAACTCCAGTCA	ATAC-seq on Human E53 skeletal tissue	304662
					Hand phalanges 5	GTGTGGTG	SUB12606	220913_A00794_0694_BH53HFDSX5_SUB12606_new	NovaSeq S4	2x100bp	2	188263732	188263732	88.37	AGATCGGAAGAGCACACGTCTGAACTCCAGTCA	ATAC-seq on Human E53 skeletal tissue	361259
E58	Early Rep 2	H28597	Male	2020-10-09	Metatarsal 1	CCGTTTGT	SUB12606	220913_A00794_0694_BH53HFDSX5_SUB12606_singleindex	NovaSeq S4	2x100bp	3	117484617	117484617	92.01	AGATCGGAAGAGCACACGTCTGAACTCCAGTCA	ATAC-seq on Human E58 skeletal tissue
					Metatarsal 2	TGCTGGGT	SUB12606	220913_A00794_0694_BH53HFDSX5_SUB12606_singleindex	NovaSeq S4	2x100bp	3	63771770	63771770	91.85	AGATCGGAAGAGCACACGTCTGAACTCCAGTCA	ATAC-seq on Human E58 skeletal tissue
					Metatarsal 3	GAGGGGTT	SUB12606	220913_A00794_0694_BH53HFDSX5_SUB12606_singleindex	NovaSeq S4	2x100bp	3	41221159	41221159	91.43	AGATCGGAAGAGCACACGTCTGAACTCCAGTCA	ATAC-seq on Human E58 skeletal tissue
					Metatarsal 4	AGGTTGGG	SUB12606	220913_A00794_0694_BH53HFDSX5_SUB12606_singleindex	NovaSeq S4	2x100bp	3	58737435	58737435	91.95	AGATCGGAAGAGCACACGTCTGAACTCCAGTCA	ATAC-seq on Human E58 skeletal tissue
					Metatarsal 5	GTGTGGTG	SUB12606	220913_A00794_0694_BH53HFDSX5_SUB12606_singleindex	NovaSeq S4	2x100bp	3	42186894	42186894	90.97	AGATCGGAAGAGCACACGTCTGAACTCCAGTCA	ATAC-seq on Human E58 skeletal tissue
					Foot phalanges 1	AAGAGGCA	SUB12606	220913_A00794_0694_BH53HFDSX5_SUB12606_singleindex	NovaSeq S4	2x100bp	3	51371327	51371327	91.59	AGATCGGAAGAGCACACGTCTGAACTCCAGTCA	ATAC-seq on Human E58 skeletal tissue
					Foot phalanges 2	GTAGAGGA	SUB12606	220913_A00794_0694_BH53HFDSX5_SUB12606_singleindex	NovaSeq S4	2x100bp	3	37726072	69235560	87.9	AGATCGGAAGAGCACACGTCTGAACTCCAGTCA	ATAC-seq on Human E58 skeletal tissue
							SUB13550	221129_A00794_0742_AHGWKNDSX5_SUB13550	NovaSeq S4	2x100bp	4	31509488		87.76	AGATCGGAAGAGCACACGTCTGAACTCCAGTCA	ATAC-seq on Human E58 skeletal tissue
					Foot phalanges 3	GTCGTGAT	SUB12606	220913_A00794_0694_BH53HFDSX5_SUB12606_singleindex	NovaSeq S4	2x100bp	3	105712168	105712168	92.05	AGATCGGAAGAGCACACGTCTGAACTCCAGTCA	ATAC-seq on Human E58 skeletal tissue
					Foot phalanges 4	ACCACTGT	SUB12606	220913_A00794_0694_BH53HFDSX5_SUB12606_singleindex	NovaSeq S4	2x100bp	3	62790821	62790821	92.17	AGATCGGAAGAGCACACGTCTGAACTCCAGTCA	ATAC-seq on Human E58 skeletal tissue
					Foot phalanges 5	TGGATCTG	SUB12606	220913_A00794_0694_BH53HFDSX5_SUB12606_singleindex	NovaSeq S4	2x100bp	3	11689959	19941437	91.06	AGATCGGAAGAGCACACGTCTGAACTCCAGTCA	ATAC-seq on Human E58 skeletal tissue	Too few reads. Sample not included in analysis.
							SUB13550	221129_A00794_0742_AHGWKNDSX5_SUB13550	NovaSeq S4	2x100bp	4	8251478		91.05	AGATCGGAAGAGCACACGTCTGAACTCCAGTCA	ATAC-seq on Human E58 skeletal tissue
					Metacarpal 1	TAGGCATG	SUB12606	220913_A00794_0694_BH53HFDSX5_SUB12606_singleindex	NovaSeq S4	2x100bp	3	70424231	70424231	90.53	AGATCGGAAGAGCACACGTCTGAACTCCAGTCA	ATAC-seq on Human E58 skeletal tissue
					Metacarpal 2	CTCTCTAC	SUB12606	220913_A00794_0694_BH53HFDSX5_SUB12606_singleindex	NovaSeq S4	2x100bp	3	278129580	278129580	91.09	AGATCGGAAGAGCACACGTCTGAACTCCAGTCA	ATAC-seq on Human E58 skeletal tissue
					Metacarpal 3	CAGAGAGG	SUB12606	220913_A00794_0694_BH53HFDSX5_SUB12606_singleindex	NovaSeq S4	2x100bp	3	386086225	386086225	91.51	AGATCGGAAGAGCACACGTCTGAACTCCAGTCA	ATAC-seq on Human E58 skeletal tissue
					Metacarpal 4	GCTACGCT	SUB12606	220913_A00794_0694_BH53HFDSX5_SUB12606_singleindex	NovaSeq S4	2x100bp	3	109701489	109701489	91.74	AGATCGGAAGAGCACACGTCTGAACTCCAGTCA	ATAC-seq on Human E58 skeletal tissue
					Metacarpal 5	CGAGGCTG	SUB12606	220913_A00794_0694_BH53HFDSX5_SUB12606_singleindex	NovaSeq S4	2x100bp	3	42614082	42614082	92.01	AGATCGGAAGAGCACACGTCTGAACTCCAGTCA	ATAC-seq on Human E58 skeletal tissue
					Hand phalanges 1	TAAGGCGA	SUB12606	220913_A00794_0694_BH53HFDSX5_SUB12606_singleindex	NovaSeq S4	2x100bp	3	67445160	67445160	90.85	AGATCGGAAGAGCACACGTCTGAACTCCAGTCA	ATAC-seq on Human E58 skeletal tissue
					Hand phalanges 2	CGTACTAG	SUB12606	220913_A00794_0694_BH53HFDSX5_SUB12606_singleindex	NovaSeq S4	2x100bp	3	66924959	66924959	91.84	AGATCGGAAGAGCACACGTCTGAACTCCAGTCA	ATAC-seq on Human E58 skeletal tissue
					Hand phalanges 3	AGGCAGAA	SUB12606	220913_A00794_0694_BH53HFDSX5_SUB12606_singleindex	NovaSeq S4	2x100bp	3	88646414	88646414	91.7	AGATCGGAAGAGCACACGTCTGAACTCCAGTCA	ATAC-seq on Human E58 skeletal tissue
					Hand phalanges 4	TCCTGAGC	SUB12606	220913_A00794_0694_BH53HFDSX5_SUB12606_singleindex	NovaSeq S4	2x100bp	3	96038661	96038661	91.69	AGATCGGAAGAGCACACGTCTGAACTCCAGTCA	ATAC-seq on Human E58 skeletal tissue
					Hand phalanges 5	GGACTCCT	SUB12606	220913_A00794_0694_BH53HFDSX5_SUB12606_singleindex	NovaSeq S4	2x100bp	3	64875535	64875535	91.96	AGATCGGAAGAGCACACGTCTGAACTCCAGTCA	ATAC-seq on Human E58 skeletal tissue
E59	Early Rep 3	H28824	Male	2021-07-17	Metatarsal 1	AAGAGGCA	SUB12606	220913_A00794_0694_BH53HFDSX5_SUB12606_singleindex	NovaSeq S4	2x100bp	4	66215328	66215328	90.45	AGATCGGAAGAGCACACGTCTGAACTCCAGTCA	ATAC-seq on Human E59 skeletal tissue
					Metatarsal 2	GTAGAGGA	SUB12606	220913_A00794_0694_BH53HFDSX5_SUB12606_singleindex	NovaSeq S4	2x100bp	4	51877907	51877907	87.78	AGATCGGAAGAGCACACGTCTGAACTCCAGTCA	ATAC-seq on Human E59 skeletal tissue
					Metatarsal 3	GTCGTGAT	SUB12606	220913_A00794_0694_BH53HFDSX5_SUB12606_singleindex	NovaSeq S4	2x100bp	4	71663061	71663061	91.22	AGATCGGAAGAGCACACGTCTGAACTCCAGTCA	ATAC-seq on Human E59 skeletal tissue
					Metatarsal 4	ACCACTGT	SUB12606	220913_A00794_0694_BH53HFDSX5_SUB12606_singleindex	NovaSeq S4	2x100bp	4	126611499	126611499	91.37	AGATCGGAAGAGCACACGTCTGAACTCCAGTCA	ATAC-seq on Human E59 skeletal tissue
					Metatarsal 5	TGGATCTG	SUB12606	220913_A00794_0694_BH53HFDSX5_SUB12606_singleindex	NovaSeq S4	2x100bp	4	93127406	93127406	90.03	AGATCGGAAGAGCACACGTCTGAACTCCAGTCA	ATAC-seq on Human E59 skeletal tissue
					Foot phalanges 1	TAGGCATG	SUB12606	220913_A00794_0694_BH53HFDSX5_SUB12606_singleindex	NovaSeq S4	2x100bp	4	97007836	97007836	89.48	AGATCGGAAGAGCACACGTCTGAACTCCAGTCA	ATAC-seq on Human E59 skeletal tissue
					Foot phalanges 2	CTCTCTAC	SUB12606	220913_A00794_0694_BH53HFDSX5_SUB12606_singleindex	NovaSeq S4	2x100bp	4	86430101	86430101	90.53	AGATCGGAAGAGCACACGTCTGAACTCCAGTCA	ATAC-seq on Human E59 skeletal tissue
					Foot phalanges 3	CAGAGAGG	SUB12606	220913_A00794_0694_BH53HFDSX5_SUB12606_singleindex	NovaSeq S4	2x100bp	4	78745957	78745957	90.97	AGATCGGAAGAGCACACGTCTGAACTCCAGTCA	ATAC-seq on Human E59 skeletal tissue
					Foot phalanges 4	GCTACGCT	SUB12606	220913_A00794_0694_BH53HFDSX5_SUB12606_singleindex	NovaSeq S4	2x100bp	4	41964236	41964236	91.42	AGATCGGAAGAGCACACGTCTGAACTCCAGTCA	ATAC-seq on Human E59 skeletal tissue
					Foot phalanges 5	CGAGGCTG	SUB12606	220913_A00794_0694_BH53HFDSX5_SUB12606_singleindex	NovaSeq S4	2x100bp	4	24338824	46860980	91.51	AGATCGGAAGAGCACACGTCTGAACTCCAGTCA	ATAC-seq on Human E59 skeletal tissue
							SUB13550	221129_A00794_0742_AHGWKNDSX5_SUB13550	NovaSeq S4	2x100bp	4	22522156		92	AGATCGGAAGAGCACACGTCTGAACTCCAGTCA	ATAC-seq on Human E59 skeletal tissue
					Metacarpal 1	CCGTTTGT	SUB12606	220913_A00794_0694_BH53HFDSX5_SUB12606_singleindex	NovaSeq S4	2x100bp	4	242600759	242600759	91.51	AGATCGGAAGAGCACACGTCTGAACTCCAGTCA	ATAC-seq on Human E59 skeletal tissue
					Metacarpal 2	TGCTGGGT	SUB12606	220913_A00794_0694_BH53HFDSX5_SUB12606_singleindex	NovaSeq S4	2x100bp	4	130491317	130491317	90.13	AGATCGGAAGAGCACACGTCTGAACTCCAGTCA	ATAC-seq on Human E59 skeletal tissue
					Metacarpal 3	GAGGGGTT	SUB12606	220913_A00794_0694_BH53HFDSX5_SUB12606_singleindex	NovaSeq S4	2x100bp	4	151643749	151643749	89.62	AGATCGGAAGAGCACACGTCTGAACTCCAGTCA	ATAC-seq on Human E59 skeletal tissue
					Metacarpal 4	AGGTTGGG	SUB12606	220913_A00794_0694_BH53HFDSX5_SUB12606_singleindex	NovaSeq S4	2x100bp	4	65680629	65680629	91.23	AGATCGGAAGAGCACACGTCTGAACTCCAGTCA	ATAC-seq on Human E59 skeletal tissue
					Metacarpal 5	GTGTGGTG	SUB12606	220913_A00794_0694_BH53HFDSX5_SUB12606_singleindex	NovaSeq S4	2x100bp	4	128445095	128445095	91.27	AGATCGGAAGAGCACACGTCTGAACTCCAGTCA	ATAC-seq on Human E59 skeletal tissue
					Hand phalanges 1	TAAGGCGA	SUB12606	220913_A00794_0694_BH53HFDSX5_SUB12606_singleindex	NovaSeq S4	2x100bp	4	95019401	95019401	90.02	AGATCGGAAGAGCACACGTCTGAACTCCAGTCA	ATAC-seq on Human E59 skeletal tissue
					Hand phalanges 2	CGTACTAG	SUB12606	220913_A00794_0694_BH53HFDSX5_SUB12606_singleindex	NovaSeq S4	2x100bp	4	73764367	73764367	91.09	AGATCGGAAGAGCACACGTCTGAACTCCAGTCA	ATAC-seq on Human E59 skeletal tissue
					Hand phalanges 3	AGGCAGAA	SUB12606	220913_A00794_0694_BH53HFDSX5_SUB12606_singleindex	NovaSeq S4	2x100bp	4	81370510	81370510	91.2	AGATCGGAAGAGCACACGTCTGAACTCCAGTCA	ATAC-seq on Human E59 skeletal tissue
					Hand phalanges 4	TCCTGAGC	SUB12606	220913_A00794_0694_BH53HFDSX5_SUB12606_singleindex	NovaSeq S4	2x100bp	4	88102733	88102733	91.15	AGATCGGAAGAGCACACGTCTGAACTCCAGTCA	ATAC-seq on Human E59 skeletal tissue
					Hand phalanges 5	GGACTCCT	SUB12606	220913_A00794_0694_BH53HFDSX5_SUB12606_singleindex	NovaSeq S4	2x100bp	4	106212548	106212548	91.59	AGATCGGAAGAGCACACGTCTGAACTCCAGTCA	ATAC-seq on Human E59 skeletal tissue
E53	Early Rep 4	H28829	Male	2021-07-29	Metatarsal 1	TAAGGCGA	SUB13550	221129_A00794_0742_AHGWKNDSX5_SUB13550	NovaSeq S4	2x100bp	4	45086399	45086399	89.9	AGATCGGAAGAGCACACGTCTGAACTCCAGTCA	ATAC-seq on Human E53 skeletal tissue
					Metatarsal 2	CGTACTAG	SUB13550	221129_A00794_0742_AHGWKNDSX5_SUB13550	NovaSeq S4	2x100bp	4	124841491	124841491	91.41	AGATCGGAAGAGCACACGTCTGAACTCCAGTCA	ATAC-seq on Human E53 skeletal tissue
					Metatarsal 3	AGGCAGAA	SUB13550	221129_A00794_0742_AHGWKNDSX5_SUB13550	NovaSeq S4	2x100bp	4	150687846	150687846	90.7	AGATCGGAAGAGCACACGTCTGAACTCCAGTCA	ATAC-seq on Human E53 skeletal tissue
					Metatarsal 4	TCCTGAGC	SUB13550	221129_A00794_0742_AHGWKNDSX5_SUB13550	NovaSeq S4	2x100bp	4	113639981	113639981	90.3	AGATCGGAAGAGCACACGTCTGAACTCCAGTCA	ATAC-seq on Human E53 skeletal tissue
					Metatarsal 5	GGACTCCT	SUB13550	221129_A00794_0742_AHGWKNDSX5_SUB13550	NovaSeq S4	2x100bp	4	95327963	95327963	92.21	AGATCGGAAGAGCACACGTCTGAACTCCAGTCA	ATAC-seq on Human E53 skeletal tissue
					Foot phalanges 1	GTGTGGTG	SUB13550	221129_A00794_0742_AHGWKNDSX5_SUB13550	NovaSeq S4	2x100bp	4	142551997	142551997	90.96	AGATCGGAAGAGCACACGTCTGAACTCCAGTCA	ATAC-seq on Human E53 skeletal tissue
					Foot phalanges 2	TGGGTTTC	SUB13550	221129_A00794_0742_AHGWKNDSX5_SUB13550	NovaSeq S4	2x100bp	4	123706495	123706495	91.66	AGATCGGAAGAGCACACGTCTGAACTCCAGTCA	ATAC-seq on Human E53 skeletal tissue
					Foot phalanges 3	TGGTCACA	SUB13550	221129_A00794_0742_AHGWKNDSX5_SUB13550	NovaSeq S4	2x100bp	4	141802969	141802969	90.19	AGATCGGAAGAGCACACGTCTGAACTCCAGTCA	ATAC-seq on Human E53 skeletal tissue
					Foot phalanges 4	TTGACCCT	SUB13550	221129_A00794_0742_AHGWKNDSX5_SUB13550	NovaSeq S4	2x100bp	4	119964756	119964756	90.16	AGATCGGAAGAGCACACGTCTGAACTCCAGTCA	ATAC-seq on Human E53 skeletal tissue
					Foot phalanges 5	CCACTCCT	SUB13550	221129_A00794_0742_AHGWKNDSX5_SUB13550	NovaSeq S4	2x100bp	4	127016514	127016514	90.09	AGATCGGAAGAGCACACGTCTGAACTCCAGTCA	ATAC-seq on Human E53 skeletal tissue
					Metacarpal 1	TAGGCATG	SUB13550	221129_A00794_0742_AHGWKNDSX5_SUB13550	NovaSeq S4	2x100bp	3	123282464	123282464	91.09	AGATCGGAAGAGCACACGTCTGAACTCCAGTCA	ATAC-seq on Human E53 skeletal tissue	299284
					Metacarpal 2	CTCTCTAC	SUB13550	221129_A00794_0742_AHGWKNDSX5_SUB13550	NovaSeq S4	2x100bp	3	93367871	93367871	90.83	AGATCGGAAGAGCACACGTCTGAACTCCAGTCA	ATAC-seq on Human E53 skeletal tissue	216702
					Metacarpal 3	CAGAGAGG	SUB13550	221129_A00794_0742_AHGWKNDSX5_SUB13550	NovaSeq S4	2x100bp	3	87891824	87891824	91.71	AGATCGGAAGAGCACACGTCTGAACTCCAGTCA	ATAC-seq on Human E53 skeletal tissue
					Metacarpal 4	GCTACGCT	SUB13550	221129_A00794_0742_AHGWKNDSX5_SUB13550	NovaSeq S4	2x100bp	3	116205519	116205519	91.87	AGATCGGAAGAGCACACGTCTGAACTCCAGTCA	ATAC-seq on Human E53 skeletal tissue
					Metacarpal 5	CGAGGCTG	SUB13550	221129_A00794_0742_AHGWKNDSX5_SUB13550	NovaSeq S4	2x100bp	3	101313582	101313582	92.02	AGATCGGAAGAGCACACGTCTGAACTCCAGTCA	ATAC-seq on Human E53 skeletal tissue
					Hand phalanges 1	TAAGGCGA	SUB13550	221129_A00794_0742_AHGWKNDSX5_SUB13550	NovaSeq S4	2x100bp	3	78190768	78190768	90.44	AGATCGGAAGAGCACACGTCTGAACTCCAGTCA	ATAC-seq on Human E53 skeletal tissue	201788
					Hand phalanges 2	CGTACTAG	SUB13550	221129_A00794_0742_AHGWKNDSX5_SUB13550	NovaSeq S4	2x100bp	3	123503735	123503735	91.92	AGATCGGAAGAGCACACGTCTGAACTCCAGTCA	ATAC-seq on Human E53 skeletal tissue	265563
					Hand phalanges 3	AGGCAGAA	SUB13550	221129_A00794_0742_AHGWKNDSX5_SUB13550	NovaSeq S4	2x100bp	3	102674711	102674711	92.03	AGATCGGAAGAGCACACGTCTGAACTCCAGTCA	ATAC-seq on Human E53 skeletal tissue	250210
					Hand phalanges 4	TCCTGAGC	SUB13550	221129_A00794_0742_AHGWKNDSX5_SUB13550	NovaSeq S4	2x100bp	3	119937516	119937516	91.56	AGATCGGAAGAGCACACGTCTGAACTCCAGTCA	ATAC-seq on Human E53 skeletal tissue	230030
					Hand phalanges 5	GGACTCCT	SUB13550	221129_A00794_0742_AHGWKNDSX5_SUB13550	NovaSeq S4	2x100bp	3	126842374	126842374	91.69	AGATCGGAAGAGCACACGTCTGAACTCCAGTCA	ATAC-seq on Human E53 skeletal tissue	224608
E74	Late Rep 4	H29248	Female	2022-10-19	Metacarpal 3	GCTACGCT	SUB13550	221129_A00794_0742_AHGWKNDSX5_SUB13550	NovaSeq S4	2x100bp	4	90999948	90999948	91.48	AGATCGGAAGAGCACACGTCTGAACTCCAGTCA	ATAC-seq on Human E74 skeletal tissue	320224
					Hand phalanges 3	CAGAGAGG	SUB13550	221129_A00794_0742_AHGWKNDSX5_SUB13550	NovaSeq S4	2x100bp	4	35284240	35284240	92.18	AGATCGGAAGAGCACACGTCTGAACTCCAGTCA	ATAC-seq on Human E74 skeletal tissue	166508

## Sheet: Peak Counts
Early Stage Samples
Tissue	Replicate 1 Peaks (H28723)	Replicate 2 Peaks (H28597)	Replicate 3 Peaks (H28824)	Replicate 4 Peaks (H28829)	IDR-called Peaks (p<0.05)	Brain-filtered IDR-called Peaks
Hand phalanges I	228596	208075	261592	201788	42333	29636
Hand phalanges II	NA	691911	202080	265563	36037	23572
Hand phalanges III	164510	208074	220862	250210	40463	27865
Hand phalanges IV	151763	350700	238382	230030	45516	32775
Hand phalanges V	435284	191335	251964	224608	48981	36149
Metacarpal I	393934	377788	330083	299284	46111	33337
Metacarpal II	236991	294233	284408	216702	54089	41120
Metacarpal III	261269	572092	274718	217564	51051	38202
Metacarpal IV	305387	368447	164919	218702	48062	35241
Metacarpal V	411164	165469	268428	221643	49872	37035
Foot phalanges I	182160	175098	164566	327497	39399	26748
Foot phalanges II	205116	191189	270960	274633	42038	29372
Foot phalanges III	193105	245975	302194	287241	48867	35861
Foot phalanges IV	309497	161531	169456	267938	32868	20461
Foot phalanges V	369789	144240	512460	263540	46337	33407
Metatarsal I	262680	214403	242748	149431	40542	27953
Metatarsal II	213908	200518	267835	243154	41900	29276
Metatarsal III	220529	165630	240788	212898	39855	27303
Metatarsal IV	400830	196014	244595	211214	43833	31143
Metatarsal V	291841	143908	278820	262724	45001	32246
Late Stage Samples
Tissue	Replicate 1 Peaks (H29067)	Replicate 2 Peaks (H29042)	Replicate 3 Peaks (H28680)	Replicate 4 Peaks (H29248)	IDR-called Peaks (p<0.05)	Brain-filtered IDR-called Peaks
Hand phalanges I	111464	170821	172886	NA	33727	21254
Hand phalanges II	112149	150394	168213	NA	34110	21585
Hand phalanges III	128920	177444	162413	166508	35707	23118
Hand phalanges IV	172149	156579	168193	NA	35765	23169
Hand phalanges V	232184	147918	181423	NA	38505	25756
Metacarpal I	180155	148446	379233	NA	43159	30440
Metacarpal II	144974	203541	206163	NA	46238	33439
Metacarpal III	NA	185065	244505	320224	45125	32327
Metacarpal IV	145700	258133	157370	NA	37989	25407
Metacarpal V	148483	191700	205431	NA	44087	31333
Foot phalanges I	266753	178266	169516	NA	43697	30835
Foot phalanges II	473758	290849	170477	NA	44133	31239
Foot phalanges III	161723	288034	205168	NA	26145	14021
Foot phalanges IV	189267	245035	140192	NA	25934	13921
Foot phalanges V	155474	125469	307167	NA	36067	23639
Metatarsal I	158756	208714	245452	NA	43265	34762
Metatarsal II	221947	167305	384818	NA	45637	33075
Metatarsal III	163562	271953	213043	NA	41877	29513
Metatarsal IV	172396	233635	230779	NA	36300	33658
Metatarsal V	166379	211706	186282	NA	43691	32637

## Sheet: Autopod-specific Sets GREAT
ID	name	Binom_Genome_Fraction	Binom_Expected	Binom_Observed_Region_Hits	Binom_Fold_Enrichment	Binom_Region_Set_Coverage	Binom_Raw_PValue	Binom_Adjp_BH	Hyper_Total_Genes	Hyper_Expected	Hyper_Observed_Gene_Hits	Hyper_Fold_Enrichment	Hyper_Gene_Set_Coverage	Hyper_Term_Gene_Coverage	Hyper_Raw_PValue	Hyper_Adjp_BH	Ontology	Set
GO:0060419	heart growth	0.004132	12.4001	29	2.33868	0.00966345	3.831e-05	0.00438366	27	5.41956	14	2.58324	0.00371451	0.518518	0.00023515	0.00773575	GO Biological Process	BOTH_STAGES
GO:0060536	cartilage morphogenesis	0.00233576	7.0096	20	2.85323	0.00666445	4.4025e-05	0.00490957	12	2.40869	11	4.56679	0.00291855	0.916667	2.0636e-07	1.8103e-05	GO Biological Process	BOTH_STAGES
GO:0033561	regulation of water loss via skin	0.00165076	4.95394	16	3.22975	0.00533156	6.091e-05	0.00621334	22	4.41593	11	2.49098	0.00291855	0.5	0.00162952	0.0365919	GO Biological Process	BOTH_STAGES
GO:0030282	bone mineralization	0.00516494	15.5	33	2.12903	0.0109963	7.0036e-05	0.00703518	39	7.82825	16	2.04388	0.00424516	0.410256	0.00222046	0.0466014	GO Biological Process	BOTH_STAGES
GO:0055017	cardiac muscle tissue growth	0.00410628	12.3229	28	2.27219	0.00933022	8.3151e-05	0.00765164	26	5.21883	13	2.49098	0.00344919	0.5	0.00061983	0.0172438	GO Biological Process	BOTH_STAGES
GO:0003149	membranous septum morphogenesis	0.00247911	7.4398	20	2.68824	0.00666445	9.7209e-05	0.00875853	9	1.80652	8	4.42841	0.00212258	0.888889	1.9376e-05	0.00094234	GO Biological Process	BOTH_STAGES
GO:0071695	anatomical structure maturation	0.00516375	15.4964	31	2.00046	0.0103299	0.00032539	0.0225361	43	8.63114	18	2.08547	0.0047758	0.418605	0.00090889	0.0236833	GO Biological Process	BOTH_STAGES
GO:0060317	cardiac epithelial to mesenchymal transition	0.00478428	14.3576	29	2.01983	0.00966345	0.00042728	0.0278346	27	5.41956	15	2.76775	0.00397984	0.555556	4.9317e-05	0.00210703	GO Biological Process	BOTH_STAGES
HP:0009832	Abnormality of the distal phalanx of finger	0.0101096	30.339	62	2.04357	0.0206598	2.6113e-07	0.00087126	72	14.4521	29	2.00662	0.00769435	0.402778	6.6493e-05	0.0135809	Human Phenotype	BOTH_STAGES
HP:0001283	Bulbar palsy	0.00262811	7.88697	21	2.66262	0.00699767	7.534e-05	0.0209476	27	5.41956	14	2.58324	0.00371451	0.518518	0.00023515	0.0286333	Human Phenotype	BOTH_STAGES
HP:0010161	Abnormality of the phalanges of the toes	0.00589993	17.7057	36	2.03325	0.011996	8.3598e-05	0.0210935	35	7.02535	16	2.27747	0.00424516	0.457143	0.00054055	0.0419201	Human Phenotype	BOTH_STAGES
MP:0004596	abnormal mandibular angle morphology	0.00346793	10.4072	30	2.88261	0.00999667	5.2951e-07	0.00027961	13	2.60942	11	4.2155	0.00291855	0.846154	1.0955e-06	4.6551e-05	Mouse Phenotype	BOTH_STAGES
MP:0003922	abnormal heart right atrium morphology	0.00728187	21.8529	45	2.05923	0.014995	8.785e-06	0.00171414	43	8.63114	20	2.31719	0.00530645	0.465116	8.3641e-05	0.00180926	Mouse Phenotype	BOTH_STAGES
MP:0001218	thin epidermis	0.00687317	20.6264	43	2.08471	0.0143286	1.0301e-05	0.00189397	50	10.0362	21	2.09242	0.00557177	0.42	0.00033121	0.00558499	Mouse Phenotype	BOTH_STAGES
MP:0004141	abnormal enteroendocrine cell morphology	0.00230906	6.92949	21	3.03053	0.00699767	1.2129e-05	0.00207075	20	4.01449	10	2.49098	0.00265322	0.5	0.00265492	0.0284571	Mouse Phenotype	BOTH_STAGES
MP:0010860	abnormal anterior commissure pars posterior morphology	0.00252853	7.58811	22	2.89927	0.00733089	1.4862e-05	0.00236825	9	1.80652	7	3.87486	0.00185726	0.777778	0.00032018	0.00545669	Mouse Phenotype	BOTH_STAGES
MP:0003800	monodactyly	0.00089549	2.68735	12	4.46536	0.00399867	2.4964e-05	0.00320165	8	1.60579	6	3.73647	0.00159193	0.75	0.00125314	0.0161472	Mouse Phenotype	BOTH_STAGES
MP:0008727	enlarged heart right atrium	0.0027035	8.1132	22	2.71163	0.00733089	3.9677e-05	0.00446299	13	2.60942	9	3.44905	0.0023879	0.692308	0.00016993	0.00331568	Mouse Phenotype	BOTH_STAGES
MP:0004091	abnormal Z lines	0.00401033	12.035	28	2.32655	0.00933022	5.6216e-05	0.00576574	41	8.2297	16	1.94418	0.00424516	0.390244	0.00404334	0.0388499	Mouse Phenotype	BOTH_STAGES
MP:0001715	placental labyrinth hypoplasia	0.00223107	6.69543	19	2.83776	0.00633122	7.2234e-05	0.00651539	16	3.21159	10	3.11372	0.00265322	0.625	0.00025371	0.00447553	Mouse Phenotype	BOTH_STAGES
MP:0001307	fused cornea and lens	0.00262402	7.87469	21	2.66677	0.00699767	7.3751e-05	0.00653764	16	3.21159	10	3.11372	0.00265322	0.625	0.00025371	0.00447553	Mouse Phenotype	BOTH_STAGES
MP:0000494	abnormal cecum morphology	0.00458873	13.7708	30	2.17852	0.00999667	9.8437e-05	0.00811341	33	6.6239	14	2.11356	0.00371451	0.424242	0.0028478	0.0301526	Mouse Phenotype	BOTH_STAGES
MP:0002544	brachydactyly	0.00575933	17.2837	35	2.02502	0.0116628	0.00011208	0.00878365	36	7.22607	18	2.49098	0.0047758	0.5	5.7449e-05	0.00132996	Mouse Phenotype	BOTH_STAGES
MP:0002543	brachyphalangia	0.00338327	10.1532	24	2.36379	0.00799733	0.00014527	0.0105244	21	4.21521	12	2.84683	0.00318387	0.571429	0.00019934	0.00372981	Mouse Phenotype	BOTH_STAGES
MP:0030026	small Meckel's cartilage	0.00384177	11.5291	26	2.25515	0.00866378	0.00016349	0.0117527	21	4.21521	10	2.37236	0.00265322	0.476191	0.00416481	0.0397007	Mouse Phenotype	BOTH_STAGES
MP:0004969	pale kidney	0.00483769	14.5179	30	2.06641	0.00999667	0.00023792	0.0150806	45	9.03259	18	1.99278	0.0047758	0.4	0.00170058	0.0202986	Mouse Phenotype	BOTH_STAGES
MP:0011365	small metanephros	0.00102033	3.06202	11	3.5924	0.00366545	0.00034307	0.0197594	7	1.40507	5	3.55854	0.00132661	0.714286	0.00474227	0.0432229	Mouse Phenotype	BOTH_STAGES
MP:0003124	hypospadia	0.00283982	8.52229	20	2.34679	0.00666445	0.00054039	0.0256208	11	2.20797	8	3.62324	0.00212258	0.727273	0.00024038	0.00428962	Mouse Phenotype	BOTH_STAGES
MP:0000081	premature suture closure	0.00311614	9.35155	21	2.24562	0.00699767	0.0006932	0.029197	13	2.60942	8	3.06582	0.00212258	0.615385	0.00127184	0.0163004	Mouse Phenotype	BOTH_STAGES
MP:0004575	small limb buds	0.0040128	12.0424	25	2.076	0.00833056	0.0007002	0.0293625	20	4.01449	13	3.23827	0.00344919	0.65	1.5607e-05	0.0004582	Mouse Phenotype	BOTH_STAGES
MP:0006303	abnormal retinal nerve fiber layer morphology	0.00230797	6.92621	17	2.45444	0.00566478	0.00084254	0.0331501	18	3.61304	10	2.76775	0.00265322	0.555556	0.00093274	0.0126316	Mouse Phenotype	BOTH_STAGES
MP:0009728	abnormal calcaneum morphology	0.00253383	7.60403	18	2.36716	0.005998	0.00090416	0.0348625	8	1.60579	7	4.35921	0.00185726	0.875	8.6221e-05	0.00184833	Mouse Phenotype	BOTH_STAGES
MP:0003315	abnormal perineum morphology	0.00411406	12.3463	25	2.0249	0.00833056	0.00098403	0.0370407	30	6.02173	13	2.15885	0.00344919	0.433333	0.00319227	0.0327131	Mouse Phenotype	BOTH_STAGES
MP:0004836	abnormal synaptic acetylcholine release	0.00066079	1.98304	8	4.03422	0.00266578	0.00103419	0.0378845	7	1.40507	5	3.55854	0.00132661	0.714286	0.00474227	0.0432229	Mouse Phenotype	BOTH_STAGES
MP:0003160	abnormal esophagus development	0.00235647	7.07177	17	2.40392	0.00566478	0.00105044	0.0380993	9	1.80652	7	3.87486	0.00185726	0.777778	0.00032018	0.00545669	Mouse Phenotype	BOTH_STAGES
MP:0009734	abnormal prostate gland duct morphology	0.00122071	3.66335	11	3.00272	0.00366545	0.00144391	0.0458535	8	1.60579	6	3.73647	0.00159193	0.75	0.00125314	0.0161472	Mouse Phenotype	BOTH_STAGES
MP:0006295	absent sclerotome	0.00180811	5.42615	14	2.5801	0.00466511	0.00147383	0.0463308	7	1.40507	6	4.27025	0.00159193	0.857143	0.00037795	0.00615627	Mouse Phenotype	BOTH_STAGES
MP:0006230	iris stroma hypoplasia	0.00071325	2.14046	8	3.73752	0.00266578	0.0016633	0.0495414	6	1.20435	5	4.15163	0.00132661	0.833333	0.0016249	0.0195663	Mouse Phenotype	BOTH_STAGES
GO:0061036	positive regulation of cartilage development	0.00655467	53.3025	132	2.47643	0.0162322	6.1367e-20	1.3923e-17	29	11.0937	21	1.89296	0.00292357	0.724138	0.00019714	0.00458324	GO Biological Process	EARLY
GO:0001707	mesoderm formation	0.010219	83.1007	168	2.02164	0.0206591	1.2519e-16	1.5994e-14	67	25.6303	44	1.71671	0.00612557	0.656716	4.9007e-06	0.00018638	GO Biological Process	EARLY
GO:0072132	mesenchyme morphogenesis	0.00877871	71.3885	145	2.03114	0.0178308	1.0221e-14	9.7458e-13	43	16.4493	31	1.88458	0.00431575	0.72093	6.8677e-06	0.00024558	GO Biological Process	EARLY
GO:0032332	positive regulation of chondrocyte differentiation	0.00426301	34.6668	86	2.48076	0.0105755	1.3836e-13	1.0902e-11	18	6.88576	15	2.17841	0.00208826	0.833333	0.00011798	0.00294031	GO Biological Process	EARLY
GO:0040036	regulation of fibroblast growth factor receptor signaling pathway	0.00699562	56.8884	120	2.10939	0.0147565	1.7265e-13	1.3364e-11	26	9.9461	21	2.11138	0.00292357	0.807692	1.1617e-05	0.000387	GO Biological Process	EARLY
GO:0040037	negative regulation of fibroblast growth factor receptor signaling pathway	0.0042027	34.1764	81	2.37006	0.00996065	6.2964e-12	3.6824e-10	12	4.59051	10	2.17841	0.00139218	0.833333	0.00188313	0.0306684	GO Biological Process	EARLY
GO:0009948	anterior/posterior axis specification	0.00663126	53.9254	110	2.03986	0.0135268	1.1964e-11	6.671e-10	51	19.5097	31	1.58896	0.00431575	0.607843	0.0009109	0.0171481	GO Biological Process	EARLY
GO:0030823	regulation of cGMP metabolic process	0.00350944	28.5388	71	2.48784	0.00873094	1.5165e-11	8.2802e-10	28	10.7112	19	1.77385	0.00264513	0.678571	0.001432	0.0246968	GO Biological Process	EARLY
GO:0030825	positive regulation of cGMP metabolic process	0.00245495	19.9636	55	2.75501	0.0067634	7.8731e-11	3.795e-09	21	8.03339	15	1.86721	0.00208826	0.714286	0.00210708	0.0335655	GO Biological Process	EARLY
GO:0048596	embryonic camera-type eye morphogenesis	0.00462425	37.6044	80	2.12741	0.00983768	1.1277e-09	4.5941e-08	25	9.56356	21	2.19584	0.00292357	0.84	3.5055e-06	0.00014063	GO Biological Process	EARLY
GO:1902229	regulation of intrinsic apoptotic signaling pathway in response to DNA damage	0.00291192	23.6797	57	2.40712	0.00700935	4.3941e-09	1.6151e-07	37	14.1541	24	1.69562	0.00334122	0.648649	0.00093075	0.0173175	GO Biological Process	EARLY
GO:0060685	regulation of prostatic bud formation	0.00265114	21.5591	53	2.45836	0.00651746	7.5913e-09	2.6568e-07	6	2.29526	6	2.61409	0.00083531	1	0.00312981	0.0461717	GO Biological Process	EARLY
GO:0060900	embryonic camera-type eye formation	0.0026429	21.4921	52	2.4195	0.00639449	1.7204e-08	5.5624e-07	12	4.59051	11	2.39625	0.00153139	0.916667	0.0001992	0.00460686	GO Biological Process	EARLY
GO:2000738	positive regulation of stem cell differentiation	0.00430464	35.0053	72	2.05683	0.00885391	2.6939e-08	8.4203e-07	17	6.50322	13	1.99901	0.00180983	0.764706	0.00155364	0.0263297	GO Biological Process	EARLY
GO:2000052	positive regulation of non-canonical Wnt signaling pathway	0.00270782	22.02	49	2.22525	0.00602558	4.7724e-07	1.1377e-05	12	4.59051	10	2.17841	0.00139218	0.833333	0.00188313	0.0306684	GO Biological Process	EARLY
GO:0043518	negative regulation of DNA damage response, signal transduction by p53 class mediator	0.00121785	9.90355	29	2.92824	0.00356616	6.1902e-07	1.424e-05	13	4.97305	11	2.21192	0.00153139	0.846154	0.00084289	0.0160981	GO Biological Process	EARLY
GO:1901213	regulation of transcription from RNA polymerase II promoter involved in heart development	0.00282851	23.0015	49	2.1303	0.00602558	1.5723e-06	3.284e-05	13	4.97305	11	2.21192	0.00153139	0.846154	0.00084289	0.0160981	GO Biological Process	EARLY
GO:0090205	positive regulation of cholesterol metabolic process	0.00045296	3.68351	16	4.34368	0.00196754	1.7393e-06	3.5929e-05	6	2.29526	6	2.61409	0.00083531	1	0.00312981	0.0461717	GO Biological Process	EARLY
GO:0071679	commissural neuron axon guidance	0.00165063	13.4229	34	2.53298	0.00418101	1.7452e-06	3.5995e-05	8	3.06034	8	2.61409	0.00111374	1	0.0004575	0.0094658	GO Biological Process	EARLY
GO:1904948	midbrain dopaminergic neuron differentiation	0.0026548	21.5888	46	2.13073	0.00565667	3.187e-06	6.1223e-05	12	4.59051	10	2.17841	0.00139218	0.833333	0.00188313	0.0306684	GO Biological Process	EARLY
GO:0043277	apoptotic cell clearance	0.00212752	17.301	38	2.1964	0.0046729	1.126e-05	0.000189	27	10.3286	18	1.74273	0.00250592	0.666667	0.00258807	0.0394629	GO Biological Process	EARLY
GO:0032808	lacrimal gland development	0.00202127	16.437	36	2.19018	0.00442696	1.9909e-05	0.00031717	7	2.6778	7	2.61409	0.00097452	1	0.00119667	0.0214536	GO Biological Process	EARLY
GO:0060394	negative regulation of pathway-restricted SMAD protein phosphorylation	0.0020194	16.4218	34	2.07042	0.00418101	9.5681e-05	0.00126667	10	3.82543	9	2.35268	0.00125296	0.9	0.00114726	0.0207089	GO Biological Process	EARLY
GO:0022038	corpus callosum development	0.00155727	12.6637	28	2.21104	0.00344319	0.0001328	0.00167391	15	5.73814	12	2.09127	0.00167061	0.8	0.00121124	0.0215971	GO Biological Process	EARLY
GO:0070411	I-SMAD binding	0.0020989	17.0682	36	2.10918	0.00442696	4.2397e-05	0.00194565	11	4.20797	11	2.61409	0.00153139	1	2.5552e-05	0.00192642	GO Molecular Function	EARLY
GO:0032183	SUMO binding	0.00121529	9.88274	24	2.42848	0.0029513	9.9837e-05	0.0039029	14	5.3556	12	2.24065	0.00167061	0.857143	0.00037293	0.0194385	GO Molecular Function	EARLY
GO:0030957	Tat protein binding	0.00147921	12.0289	25	2.07832	0.00307427	0.00070158	0.0178439	10	3.82543	9	2.35268	0.00125296	0.9	0.00114726	0.0482945	GO Molecular Function	EARLY
HP:0008368	Tarsal synostosis	0.00217569	17.6927	43	2.43038	0.00528775	2.4695e-07	6.4625e-06	12	4.59051	11	2.39625	0.00153139	0.916667	0.0001992	0.0187222	Human Phenotype	EARLY
HP:0009140	Synostosis involving bones of the feet	0.00304695	24.7778	50	2.01794	0.00614855	5.3015e-06	9.6657e-05	15	5.73814	13	2.26554	0.00180983	0.866667	0.00016336	0.0157981	Human Phenotype	EARLY
HP:0031013	Ankylosis	0.00130225	10.5899	24	2.26631	0.0029513	0.00027057	0.00303445	8	3.06034	8	2.61409	0.00111374	1	0.0004575	0.031152	Human Phenotype	EARLY
MP:0003073	abnormal metacarpal bone morphology	0.00749194	60.9245	141	2.31434	0.0173389	9.7137e-19	1.3081e-16	44	16.8319	30	1.78233	0.00417653	0.681818	5.4675e-05	0.00098631	Mouse Phenotype	EARLY
MP:0011772	genital tubercle hypoplasia	0.00200394	16.296	63	3.86598	0.00774717	1.1372e-18	1.4693e-16	7	2.6778	7	2.61409	0.00097452	1	0.00119667	0.0124386	Mouse Phenotype	EARLY
MP:0000141	abnormal vertebral body morphology	0.00860234	69.9542	149	2.12996	0.0183227	1.042e-16	9.9982e-15	64	24.4827	37	1.51127	0.00515105	0.578125	0.00115793	0.0121392	Mouse Phenotype	EARLY
MP:0003120	abnormal tracheal cartilage morphology	0.00831169	67.5906	145	2.14527	0.0178308	1.5135e-16	1.3914e-14	36	13.7715	28	2.03318	0.00389809	0.777778	1.5485e-06	4.3802e-05	Mouse Phenotype	EARLY
MP:0011771	abnormal genital tubercle morphology	0.00294946	23.985	70	2.91849	0.00860797	1.668e-14	1.1473e-12	10	3.82543	10	2.61409	0.00139218	1	6.6852e-05	0.00117495	Mouse Phenotype	EARLY
MP:0001676	abnormal apical ectodermal ridge morphology	0.00794113	64.5773	133	2.05955	0.0163551	4.7799e-14	3.1302e-12	39	14.9192	32	2.14489	0.00445496	0.820513	2.5863e-08	1.0893e-06	Mouse Phenotype	EARLY
MP:0002543	brachyphalangia	0.00338327	27.5127	74	2.68967	0.00909985	1.5721e-13	9.7606e-12	21	8.03339	15	1.86721	0.00208826	0.714286	0.00210708	0.0197315	Mouse Phenotype	EARLY
MP:0005503	abnormal tendon morphology	0.00572269	46.5369	103	2.2133	0.012666	5.5749e-13	3.1727e-11	38	14.5366	25	1.71979	0.00348044	0.657895	0.00053198	0.00643022	Mouse Phenotype	EARLY
MP:0013743	ciliary body hypoplasia	0.00140633	11.4362	42	3.67254	0.00516478	2.7674e-12	1.3926e-10	6	2.29526	6	2.61409	0.00083531	1	0.00312981	0.0262767	Mouse Phenotype	EARLY
MP:0000081	premature suture closure	0.00311614	25.3405	66	2.60453	0.00811609	1.1773e-11	5.3857e-10	13	4.97305	11	2.21192	0.00153139	0.846154	0.00084289	0.00946987	Mouse Phenotype	EARLY
MP:0002544	brachydactyly	0.00575933	46.8349	99	2.11381	0.0121741	1.8811e-11	8.4439e-10	36	13.7715	22	1.5975	0.00306279	0.611111	0.00451847	0.0354689	Mouse Phenotype	EARLY
MP:0000084	abnormal fontanelle morphology	0.00505002	41.0667	90	2.19156	0.0110674	2.5156e-11	1.0982e-09	28	10.7112	19	1.77385	0.00264513	0.678571	0.001432	0.0143666	Mouse Phenotype	EARLY
MP:0008274	failure of bone ossification	0.00358976	29.1919	69	2.36367	0.008485	2.4051e-10	8.9477e-09	20	7.65085	14	1.82986	0.00194905	0.7	0.00400692	0.0326878	Mouse Phenotype	EARLY
MP:0000065	abnormal bone marrow cavity morphology	0.00555321	45.1587	93	2.0594	0.0114363	2.7213e-10	9.9685e-09	40	15.3017	27	1.76451	0.00375888	0.675	0.00016774	0.00247489	Mouse Phenotype	EARLY
MP:0003235	abnormal alisphenoid bone morphology	0.00583379	47.4404	96	2.02359	0.0118052	3.4296e-10	1.2145e-08	33	12.6239	27	2.1388	0.00375888	0.818182	3.7203e-07	1.2569e-05	Mouse Phenotype	EARLY
MP:0002982	abnormal primordial germ cell migration	0.00282475	22.9709	57	2.48141	0.00700935	1.5437e-09	4.9033e-08	11	4.20797	9	2.1388	0.00125296	0.818182	0.00415058	0.0333757	Mouse Phenotype	EARLY
MP:0000561	adactyly	0.00321852	26.173	62	2.36885	0.0076242	1.7301e-09	5.4234e-08	9	3.44288	8	2.32363	0.00111374	0.888889	0.00271836	0.0237059	Mouse Phenotype	EARLY
MP:0002632	vestigial tail	0.001641	13.3446	40	2.99746	0.00491884	2.8523e-09	8.549e-08	9	3.44288	8	2.32363	0.00111374	0.888889	0.00271836	0.0237059	Mouse Phenotype	EARLY
MP:0004222	iris synechia	0.00457272	37.1853	78	2.0976	0.00959174	3.2605e-09	9.7419e-08	26	9.9461	23	2.31246	0.00320201	0.884615	1.6383e-07	6.0369e-06	Mouse Phenotype	EARLY
MP:0011481	anterior iris synechia	0.0039968	32.502	71	2.18448	0.00873094	3.2954e-09	9.8153e-08	22	8.41593	20	2.37644	0.00278435	0.909091	4.147e-07	1.3864e-05	Mouse Phenotype	EARLY
MP:0004459	small alisphenoid bone	0.00328724	26.7319	62	2.31933	0.0076242	3.7297e-09	1.104e-07	16	6.12068	14	2.28733	0.00194905	0.875	7.093e-05	0.00122412	Mouse Phenotype	EARLY
MP:0006226	iris hypoplasia	0.00267722	21.7711	54	2.48035	0.00664043	4.1246e-09	1.206e-07	13	4.97305	10	2.01084	0.00139218	0.769231	0.00535058	0.0403128	Mouse Phenotype	EARLY
MP:0004221	abnormal iridocorneal angle	0.00487813	39.6689	81	2.0419	0.00996065	5.2523e-09	1.5035e-07	26	9.9461	22	2.21192	0.00306279	0.846154	1.5742e-06	4.4398e-05	Mouse Phenotype	EARLY
MP:0001699	increased embryo size	0.00182398	14.8326	42	2.83161	0.00516478	5.8004e-09	1.6359e-07	9	3.44288	8	2.32363	0.00111374	0.888889	0.00271836	0.0237059	Mouse Phenotype	EARLY
MP:0004453	abnormal pterygoid bone morphology	0.00271683	22.0933	54	2.44418	0.00664043	6.6768e-09	1.845e-07	15	5.73814	14	2.43982	0.00194905	0.933333	1.3762e-05	0.00030041	Mouse Phenotype	EARLY
MP:0020363	abnormal germ cell physiology	0.00421296	34.2598	72	2.10159	0.00885391	1.1789e-08	3.0816e-07	22	8.41593	15	1.78233	0.00208826	0.681818	0.00428557	0.0341738	Mouse Phenotype	EARLY
MP:0002260	abnormal thyroid cartilage morphology	0.00430436	35.0031	73	2.08553	0.00897688	1.2677e-08	3.267e-07	26	9.9461	17	1.70921	0.0023667	0.653846	0.00460467	0.035822	Mouse Phenotype	EARLY
MP:0000162	lordosis	0.00386987	31.4698	67	2.12903	0.00823906	2.2993e-08	5.616e-07	37	14.1541	24	1.69562	0.00334122	0.648649	0.00093075	0.010181	Mouse Phenotype	EARLY
MP:0009274	buphthalmos	0.00248174	20.1815	49	2.42797	0.00602558	3.9152e-08	9.1974e-07	12	4.59051	11	2.39625	0.00153139	0.916667	0.0001992	0.00283418	Mouse Phenotype	EARLY
MP:0004619	caudal vertebral fusion	0.00340338	27.6763	60	2.16792	0.00737826	6.5598e-08	1.4827e-06	17	6.50322	15	2.30655	0.00208826	0.882353	3.0561e-05	0.00060621	Mouse Phenotype	EARLY
MP:0010587	conotruncal ridge hypoplasia	0.00244959	19.92	48	2.40964	0.00590261	6.6497e-08	1.4959e-06	11	4.20797	9	2.1388	0.00125296	0.818182	0.00415058	0.0333757	Mouse Phenotype	EARLY
MP:0005203	abnormal trabecular meshwork morphology	0.00287012	23.3398	53	2.2708	0.00651746	9.1219e-08	1.9776e-06	15	5.73814	12	2.09127	0.00167061	0.8	0.00121124	0.0124523	Mouse Phenotype	EARLY
MP:0004337	clavicle hypoplasia	0.00219736	17.869	43	2.40641	0.00528775	3.1928e-07	6.2046e-06	10	3.82543	9	2.35268	0.00125296	0.9	0.00114726	0.0120538	Mouse Phenotype	EARLY
MP:0012132	abnormal midbrain-hindbrain boundary morphology	0.00376346	30.6045	62	2.02585	0.0076242	3.858e-07	7.3333e-06	22	8.41593	15	1.78233	0.00208826	0.681818	0.00428557	0.0341738	Mouse Phenotype	EARLY
MP:0004912	absent mandibular coronoid process	0.00230761	18.7655	44	2.34473	0.00541072	4.6401e-07	8.648e-06	12	4.59051	10	2.17841	0.00139218	0.833333	0.00188313	0.0179328	Mouse Phenotype	EARLY
MP:0004790	absent upper incisors	0.00133911	10.8896	31	2.84674	0.0038121	4.6768e-07	8.6778e-06	8	3.06034	7	2.28733	0.00097452	0.875	0.00637083	0.046364	Mouse Phenotype	EARLY
MP:0005353	abnormal patella morphology	0.00271362	22.0672	49	2.22049	0.00602558	5.0646e-07	9.2943e-06	22	8.41593	16	1.90116	0.00222748	0.727273	0.00109046	0.0115714	Mouse Phenotype	EARLY
MP:0011387	absent metanephric mesenchyme	0.00143598	11.6774	32	2.74035	0.00393507	6.899e-07	1.2238e-05	6	2.29526	6	2.61409	0.00083531	1	0.00312981	0.0262767	Mouse Phenotype	EARLY
MP:0005258	ocular hypertension	0.00297405	24.185	51	2.10875	0.00627152	1.2993e-06	2.1794e-05	15	5.73814	12	2.09127	0.00167061	0.8	0.00121124	0.0124523	Mouse Phenotype	EARLY
MP:0004831	long incisors	0.00323122	26.2763	54	2.05508	0.00664043	1.3715e-06	2.2925e-05	14	5.3556	12	2.24065	0.00167061	0.857143	0.00037293	0.00481188	Mouse Phenotype	EARLY
MP:0006429	abnormal hyaline cartilage morphology	0.00292516	23.7874	50	2.10195	0.00614855	1.7874e-06	2.9064e-05	24	9.18102	17	1.85165	0.0023667	0.708333	0.00122705	0.012534	Mouse Phenotype	EARLY
MP:0003417	premature endochondral bone ossification	0.00269112	21.8842	47	2.14767	0.00577964	2.0473e-06	3.2733e-05	8	3.06034	7	2.28733	0.00097452	0.875	0.00637083	0.046364	Mouse Phenotype	EARLY
MP:0006433	abnormal articular cartilage morphology	0.00205701	16.7276	39	2.33148	0.00479587	2.2738e-06	3.6113e-05	17	6.50322	14	2.15278	0.00194905	0.823529	0.00025932	0.00354698	Mouse Phenotype	EARLY
MP:0006236	absent Meibomian glands	0.00137975	11.2201	30	2.67377	0.00368913	2.4286e-06	3.8316e-05	8	3.06034	7	2.28733	0.00097452	0.875	0.00637083	0.046364	Mouse Phenotype	EARLY
MP:0002750	exophthalmos	0.00245656	19.9768	43	2.1525	0.00528775	5.1093e-06	7.4809e-05	20	7.65085	15	1.96057	0.00208826	0.75	0.00093174	0.010181	Mouse Phenotype	EARLY
MP:0009022	abnormal brain meninges morphology	0.00208926	16.9898	38	2.23663	0.0046729	7.6033e-06	0.00010706	14	5.3556	11	2.05393	0.00153139	0.785714	0.00256606	0.0231673	Mouse Phenotype	EARLY
MP:0002268	abnormal terminal bronchiole morphology	0.00209936	17.072	38	2.22587	0.0046729	8.4441e-06	0.00011752	14	5.3556	12	2.24065	0.00167061	0.857143	0.00037293	0.00481188	Mouse Phenotype	EARLY
MP:0004338	small clavicle	0.00276742	22.5046	46	2.04402	0.00565667	8.9484e-06	0.00012328	15	5.73814	11	1.917	0.00153139	0.733333	0.00629183	0.046364	Mouse Phenotype	EARLY
MP:0006400	decreased molar number	0.00151658	12.3328	30	2.43254	0.00368913	1.4417e-05	0.00018628	9	3.44288	8	2.32363	0.00111374	0.888889	0.00271836	0.0237059	Mouse Phenotype	EARLY
MP:0000085	large anterior fontanelle	0.002286	18.5897	39	2.09793	0.00479587	2.3546e-05	0.00028397	9	3.44288	8	2.32363	0.00111374	0.888889	0.00271836	0.0237059	Mouse Phenotype	EARLY
MP:0010988	abnormal bronchial cartilage morphology	0.00140651	11.4377	28	2.44805	0.00344319	2.4386e-05	0.00029181	8	3.06034	7	2.28733	0.00097452	0.875	0.00637083	0.046364	Mouse Phenotype	EARLY
MP:0010976	small lung lobe	0.00254799	20.7202	42	2.027	0.00516478	2.5593e-05	0.00030477	11	4.20797	10	2.37644	0.00139218	0.909091	0.00047986	0.00589705	Mouse Phenotype	EARLY
MP:0011031	abnormal branching involved in terminal bronchiole morphogenesis	0.00182781	14.8637	33	2.22017	0.00405804	3.3156e-05	0.00038148	11	4.20797	10	2.37644	0.00139218	0.909091	0.00047986	0.00589705	Mouse Phenotype	EARLY
MP:0004458	absent alisphenoid bone	0.00239788	19.4996	39	2.00004	0.00479587	6.3764e-05	0.00066607	8	3.06034	8	2.61409	0.00111374	1	0.0004575	0.00569552	Mouse Phenotype	EARLY
MP:0004226	absent Schlemm's canal	0.00182318	14.8261	32	2.15836	0.00393507	7.2039e-05	0.00074061	9	3.44288	8	2.32363	0.00111374	0.888889	0.00271836	0.0237059	Mouse Phenotype	EARLY
MP:0006133	calcified artery	0.0017475	14.2106	31	2.18147	0.0038121	7.6655e-05	0.00077968	15	5.73814	13	2.26554	0.00180983	0.866667	0.00016336	0.00242899	Mouse Phenotype	EARLY
MP:0004687	split vertebrae	0.00175328	14.2576	30	2.10414	0.00368913	0.00018121	0.00163445	6	2.29526	6	2.61409	0.00083531	1	0.00312981	0.0262767	Mouse Phenotype	EARLY
MP:0004284	abnormal Descemet membrane	0.00117633	9.56588	22	2.29984	0.00270536	0.00039112	0.00317986	8	3.06034	7	2.28733	0.00097452	0.875	0.00637083	0.046364	Mouse Phenotype	EARLY
MP:0001679	thin apical ectodermal ridge	0.00138894	11.2948	23	2.03633	0.00282833	0.00144399	0.00939322	6	2.29526	6	2.61409	0.00083531	1	0.00312981	0.0262767	Mouse Phenotype	EARLY
MP:0009275	bruising	0.00082123	6.67824	16	2.39584	0.00196754	0.00151193	0.00976725	8	3.06034	8	2.61409	0.00111374	1	0.0004575	0.00569552	Mouse Phenotype	EARLY
MP:0004642	fused metatarsal bones	0.00117416	9.54828	20	2.09462	0.00245942	0.00206376	0.0126729	8	3.06034	7	2.28733	0.00097452	0.875	0.00637083	0.046364	Mouse Phenotype	EARLY
MP:0030127	small stapes	0.00082319	6.69416	15	2.24076	0.00184457	0.00384025	0.0213717	6	2.29526	6	2.61409	0.00083531	1	0.00312981	0.0262767	Mouse Phenotype	EARLY
MP:0003200	calcified joint	0.00100306	8.15689	17	2.08413	0.00209051	0.00446312	0.0242316	6	2.29526	6	2.61409	0.00083531	1	0.00312981	0.0262767	Mouse Phenotype	EARLY
GO:0060527	prostate epithelial cord arborization involved in prostate glandular acinus morphogenesis	0.00114107	1.5005	10	6.66443	0.00760456	4.0089e-06	0.0149401	6	0.594344	5	8.41263	0.00268817	0.833333	5.2259e-05	0.00286529	GO Biological Process	LATE
GO:1904888	cranial skeletal system development	0.0109823	14.4417	33	2.28505	0.0250951	1.7145e-05	0.0317025	65	6.43873	25	3.88275	0.0134409	0.384615	8.6162e-10	2.3301e-07	GO Biological Process	LATE
GO:0014911	positive regulation of smooth muscle cell migration	0.00457591	6.01731	19	3.15755	0.0144487	1.7199e-05	0.0317025	32	3.16983	11	3.47021	0.00591398	0.34375	0.00015737	0.00665843	GO Biological Process	LATE
GO:0060525	prostate glandular acinus development	0.00203968	2.68218	12	4.47398	0.00912548	2.4092e-05	0.0317025	11	1.08963	7	6.42419	0.00376344	0.636364	2.1317e-05	0.00139556	GO Biological Process	LATE
GO:0048701	embryonic cranial skeleton morphogenesis	0.00746754	9.81981	25	2.54587	0.0190114	3.2405e-05	0.0387654	45	4.45758	18	4.03806	0.00967742	0.4	9.7112e-08	1.3741e-05	GO Biological Process	LATE
GO:0014897	striated muscle hypertrophy	0.0044324	5.82861	18	3.08822	0.0136882	3.7528e-05	0.0411531	29	2.87266	11	3.8292	0.00591398	0.37931	5.5822e-05	0.00296195	GO Biological Process	LATE
MP:0003410	abnormal artery development	0.0255072	33.542	68	2.02731	0.051711	7.2499e-08	0.00034658	155	15.3539	47	3.06111	0.0252688	0.303226	1.1285e-12	4.4957e-10	Mouse Phenotype	LATE
MP:0003922	abnormal heart right atrium morphology	0.00728187	9.57565	28	2.92408	0.0212928	8.8248e-07	0.00155637	43	4.25947	14	3.2868	0.00752688	0.325581	4.0962e-05	0.00120874	Mouse Phenotype	LATE
MP:0002672	abnormal pharyngeal arch artery morphology	0.0118748	15.6154	38	2.4335	0.0288973	9.767e-07	0.00155637	62	6.14156	23	3.74498	0.0123656	0.370968	9.1857e-09	1.0978e-06	Mouse Phenotype	LATE
MP:0004787	abnormal dorsal aorta morphology	0.0172346	22.6635	48	2.11795	0.0365019	1.8851e-06	0.00225298	106	10.5001	32	3.0476	0.0172043	0.301887	4.9871e-09	6.8117e-07	Mouse Phenotype	LATE
MP:0004599	abnormal vertebral arch morphology	0.0160871	21.1546	44	2.07993	0.0334601	7.7213e-06	0.00518105	132	13.0756	27	2.06492	0.0145161	0.204545	0.00020305	0.00435278	Mouse Phenotype	LATE
MP:0010981	abnormal branching involved in ureteric bud morphogenesis	0.0120441	15.838	36	2.27302	0.0273764	8.1284e-06	0.00518105	63	6.24061	24	3.84578	0.0129032	0.380952	2.3471e-09	3.5064e-07	Mouse Phenotype	LATE
MP:0003411	abnormal vein development	0.00986757	12.9759	31	2.38905	0.0235741	1.3303e-05	0.00578133	65	6.43873	20	3.1062	0.0107527	0.307692	2.6471e-06	0.00012592	Mouse Phenotype	LATE
MP:0013877	abnormal ductus venosus valve morphology	0.00371816	4.88938	17	3.47692	0.0129278	1.4273e-05	0.00593329	33	3.26889	10	3.05914	0.00537634	0.30303	0.00097107	0.0147138	Mouse Phenotype	LATE
MP:0002439	abnormal plasma cell morphology	0.00955661	12.5669	30	2.38722	0.0228137	1.8443e-05	0.00705341	95	9.41045	21	2.23156	0.0112903	0.221053	0.00033395	0.00643729	Mouse Phenotype	LATE
MP:0013873	abnormal ductus venosus morphology	0.00438581	5.76734	18	3.12102	0.0136882	3.2827e-05	0.00975784	40	3.96229	11	2.77617	0.00591398	0.275	0.00134208	0.0187323	Mouse Phenotype	LATE
MP:0000522	kidney cortex cysts	0.00567482	7.46239	21	2.81411	0.0159696	3.3679e-05	0.00975784	43	4.25947	16	3.75634	0.00860215	0.372093	1.5827e-06	8.3605e-05	Mouse Phenotype	LATE
MP:0009167	increased pancreatic islet number	0.00071262	0.937096	7	7.46988	0.00532319	5.5106e-05	0.0146352	12	1.18869	6	5.04758	0.00322581	0.5	0.00051108	0.00899897	Mouse Phenotype	LATE
MP:0008096	abnormal plasma cell number	0.00841462	11.0652	26	2.34971	0.0197719	8.2771e-05	0.0170727	80	7.92459	18	2.27141	0.00967742	0.225	0.00069236	0.0115526	Mouse Phenotype	LATE
MP:0010985	abnormal kidney mesenchyme morphology	0.00890848	11.7147	27	2.30481	0.0205323	8.3462e-05	0.0170727	40	3.96229	16	4.03806	0.00860215	0.4	5.0059e-07	3.1643e-05	Mouse Phenotype	LATE
MP:0000081	premature suture closure	0.00311614	4.09773	14	3.41653	0.0106464	9.4518e-05	0.0170727	13	1.28775	8	6.21241	0.00430108	0.615385	7.4461e-06	0.00028477	Mouse Phenotype	LATE
MP:0004936	impaired branching involved in ureteric bud morphogenesis	0.00998578	13.1313	29	2.20846	0.0220532	9.6114e-05	0.0170727	56	5.54721	22	3.96596	0.011828	0.392857	5.5255e-09	7.4407e-07	Mouse Phenotype	LATE
MP:0010707	decreased ventral retina size	0.00105125	1.38239	8	5.78708	0.00608365	9.6368e-05	0.0170727	6	0.594344	5	8.41263	0.00268817	0.833333	5.2259e-05	0.00145669	Mouse Phenotype	LATE
MP:0011289	abnormal nephron number	0.0065854	8.6598	22	2.54047	0.01673	9.6426e-05	0.0170727	25	2.47643	13	5.24948	0.00698925	0.52	1.406e-07	1.1489e-05	Mouse Phenotype	LATE
MP:0011364	abnormal metanephros morphology	0.00400342	5.2645	16	3.03923	0.0121673	0.00011838	0.0182555	27	2.67455	10	3.73895	0.00537634	0.37037	0.00015388	0.00348642	Mouse Phenotype	LATE
MP:0011963	abnormal total retina thickness	0.0058018	7.62937	20	2.62145	0.0152091	0.00013067	0.0198304	52	5.15098	12	2.32965	0.00645161	0.230769	0.00414846	0.0432064	Mouse Phenotype	LATE
MP:0005208	abnormal iris stroma morphology	0.00322153	4.23631	14	3.30476	0.0106464	0.0001328	0.0198394	18	1.78303	8	4.48674	0.00430108	0.444444	0.00016064	0.00359685	Mouse Phenotype	LATE
MP:0011290	decreased nephron number	0.00635822	8.36106	21	2.51165	0.0159696	0.00015985	0.0215262	24	2.37738	12	5.04758	0.00645161	0.5	7.4766e-07	4.4677e-05	Mouse Phenotype	LATE
MP:0001076	abnormal hypoglossal nerve morphology	0.00455192	5.98577	17	2.84007	0.0129278	0.00016285	0.0216249	44	4.35852	12	2.75323	0.00645161	0.272727	0.00089091	0.0138995	Mouse Phenotype	LATE
MP:0008528	polycystic kidney	0.0083166	10.9363	25	2.28596	0.0190114	0.00016943	0.022191	61	6.0425	17	2.81341	0.00913979	0.278689	6.0784e-05	0.00163247	Mouse Phenotype	LATE
MP:0002758	long tail	0.00086357	1.13559	7	6.16418	0.00532319	0.00017838	0.0227401	7	0.693402	5	7.21083	0.00268817	0.714286	0.00016788	0.00368991	Mouse Phenotype	LATE
MP:0014201	abnormal intestinal epithelium physiology	0.0103833	13.6541	29	2.1239	0.0220532	0.00018309	0.023033	107	10.5991	20	1.88695	0.0107527	0.186916	0.00392547	0.0416091	Mouse Phenotype	LATE
MP:0010420	muscular ventricular septal defect	0.00890355	11.7082	26	2.22067	0.0197719	0.00019766	0.0240838	70	6.93401	18	2.5959	0.00967742	0.257143	0.00011776	0.00280078	Mouse Phenotype	LATE
MP:0002876	abnormal thyroid physiology	0.0037968	4.9928	15	3.00433	0.0114068	0.00021501	0.024743	33	3.26889	10	3.05914	0.00537634	0.30303	0.00097107	0.0147138	Mouse Phenotype	LATE
MP:0010498	abnormal interventricular septum muscular part morphology	0.00947382	12.4581	27	2.16727	0.0205323	0.00021997	0.024743	74	7.33024	19	2.592	0.010215	0.256757	7.8639e-05	0.00201033	Mouse Phenotype	LATE
MP:0013876	absent ductus venosus valve	0.00224633	2.95393	11	3.72385	0.00836502	0.00025125	0.027298	22	2.17926	7	3.2121	0.00376344	0.318182	0.00413844	0.0431576	Mouse Phenotype	LATE
MP:0003416	premature bone ossification	0.00566311	7.44699	19	2.55137	0.0144487	0.00026483	0.0281336	26	2.57549	12	4.6593	0.00645161	0.461539	2.2101e-06	0.00010902	Mouse Phenotype	LATE
MP:0008974	proportional dwarf	0.00435488	5.72667	16	2.79394	0.0121673	0.00029859	0.0294312	26	2.57549	11	4.27103	0.00591398	0.423077	1.6503e-05	0.00055559	Mouse Phenotype	LATE
MP:0013968	multiple persisting craniopharyngeal ducts	0.00159294	2.09471	9	4.29654	0.00684411	0.00032598	0.0314815	15	1.48586	6	4.03806	0.00322581	0.4	0.00213129	0.0263612	Mouse Phenotype	LATE
MP:0005480	increased circulating triiodothyronine level	0.00195472	2.57046	10	3.89036	0.00760456	0.00033754	0.0322725	13	1.28775	6	4.6593	0.00322581	0.461539	0.00086974	0.0136995	Mouse Phenotype	LATE
MP:0000553	absent radius	0.00273775	3.60014	12	3.33321	0.00912548	0.00036139	0.0335459	13	1.28775	8	6.21241	0.00430108	0.615385	7.4461e-06	0.00028477	Mouse Phenotype	LATE
MP:0009520	decreased submandibular gland size	0.00166834	2.19386	9	4.10235	0.00684411	0.00045319	0.0380107	7	0.693402	5	7.21083	0.00268817	0.714286	0.00016788	0.00368991	Mouse Phenotype	LATE
MP:0011365	small metanephros	0.00102033	1.34174	7	5.21711	0.00532319	0.00048079	0.0380393	7	0.693402	4	5.76866	0.00215054	0.571429	0.00262663	0.0303037	Mouse Phenotype	LATE
MP:0006355	abnormal sixth pharyngeal arch artery morphology	0.00501665	6.59689	17	2.57697	0.0129278	0.00048659	0.0381335	28	2.77361	12	4.3265	0.00645161	0.428571	5.7635e-06	0.0002332	Mouse Phenotype	LATE
MP:0003703	abnormal vestibulocochlear ganglion morphology	0.00412262	5.42125	15	2.76689	0.0114068	0.00050123	0.0389613	19	1.88209	10	5.31324	0.00537634	0.526316	3.5416e-06	0.0001575	Mouse Phenotype	LATE
MP:0000681	abnormal thyroid gland morphology	0.00848829	11.1621	24	2.15013	0.0182509	0.00053241	0.0407231	85	8.41987	19	2.25657	0.010215	0.223529	0.00054307	0.00949225	Mouse Phenotype	LATE
MP:0002951	small thyroid gland	0.00462218	6.07816	16	2.63238	0.0121673	0.00056256	0.0423516	30	2.97172	12	4.03806	0.00645161	0.4	1.357e-05	0.00047699	Mouse Phenotype	LATE
MP:0009132	abnormal white fat cell size	0.00970336	12.7599	26	2.03763	0.0197719	0.00069716	0.0492078	81	8.02365	18	2.24337	0.00967742	0.222222	0.00080913	0.0130898	Mouse Phenotype	LATE
MP:0003841	abnormal lambdoidal suture morphology	0.00141882	1.86575	8	4.28782	0.00608365	0.00069792	0.0492078	7	0.693402	4	5.76866	0.00215054	0.571429	0.00262663	0.0303037	Mouse Phenotype	LATE
MP:0001851	eye inflammation	0.0102366	13.4611	27	2.00577	0.0205323	0.00070092	0.0492078	86	8.51893	17	1.99555	0.00913979	0.197674	0.00417082	0.0432744	Mouse Phenotype	LATE
MP:0003503	decreased activity of thyroid	0.00255513	3.36	11	3.27381	0.00836502	0.00072231	0.0497743	21	2.0802	7	3.36505	0.00376344	0.333333	0.00308183	0.0344222	Mouse Phenotype	LATE
MP:0004181	abnormal carotid artery morphology	0.00716085	9.41652	21	2.23012	0.0159696	0.00073404	0.0497743	50	4.95287	15	3.02855	0.00806452	0.3	6.439e-05	0.00170536	Mouse Phenotype	LATE
GO:0060419	heart growth	0.004132	16.8916	36	2.13123	0.00880626	3.3736e-05	0.00264242	27	6.91069	17	2.45996	0.00353725	0.62963	4.6116e-05	0.00152091	GO Biological Process	BOTH_REGIONS
GO:0055017	cardiac muscle tissue growth	0.00410628	16.7864	35	2.08501	0.00856164	6.5516e-05	0.00458577	26	6.65474	16	2.4043	0.00332917	0.615385	0.00011513	0.00325802	GO Biological Process	BOTH_REGIONS
GO:0035412	regulation of catenin import into nucleus	0.00433969	17.7407	36	2.02924	0.00880626	8.8127e-05	0.0057644	24	6.14283	13	2.11629	0.00270495	0.541667	0.00261497	0.0432291	GO Biological Process	BOTH_REGIONS
GO:0097061	dendritic spine organization	0.00367306	15.0155	32	2.13114	0.00782779	8.8827e-05	0.0057644	26	6.65474	18	2.70484	0.00374532	0.692308	3.7324e-06	0.00016763	GO Biological Process	BOTH_REGIONS
GO:0043277	apoptotic cell clearance	0.00212752	8.69731	22	2.52952	0.00538161	0.0001071	0.00674302	27	6.91069	14	2.02585	0.00291303	0.518518	0.00308561	0.0491567	GO Biological Process	BOTH_REGIONS
GO:1905208	negative regulation of cardiocyte differentiation	0.00297373	12.1566	26	2.13876	0.00636008	0.00036373	0.0166769	16	4.09522	10	2.44187	0.00208073	0.625	0.00198744	0.0347313	GO Biological Process	BOTH_REGIONS
GO:0002043	blood vessel endothelial cell proliferation involved in sprouting angiogenesis	0.00149465	6.11014	16	2.6186	0.00391389	0.0006088	0.02413	7	1.79166	6	3.34885	0.00124844	0.857143	0.00153315	0.0282163	GO Biological Process	BOTH_REGIONS
GO:0035331	negative regulation of hippo signaling	0.00083226	3.40227	11	3.23313	0.0026908	0.00080927	0.0299135	8	2.04761	7	3.41862	0.00145651	0.875	0.00044545	0.0104385	GO Biological Process	BOTH_REGIONS
GO:0060394	negative regulation of pathway-restricted SMAD protein phosphorylation	0.0020194	8.25531	19	2.30155	0.00464775	0.00092071	0.0330126	10	2.55951	8	3.12559	0.00166459	0.8	0.00049335	0.0113075	GO Biological Process	BOTH_REGIONS
GO:1905005	regulation of epithelial to mesenchymal transition involved in endocardial cushion formation	0.00130517	5.33553	14	2.62392	0.00342466	0.00126744	0.040383	6	1.53571	6	3.90699	0.00124844	1	0.0002805	0.00705761	GO Biological Process	BOTH_REGIONS
GO:0071514	genetic imprinting	0.00176702	7.22357	17	2.35341	0.00415851	0.00131747	0.0415745	23	5.88688	13	2.2083	0.00270495	0.565217	0.00156231	0.0284097	GO Biological Process	BOTH_REGIONS
GO:0071679	commissural neuron axon guidance	0.00165063	6.74778	16	2.37115	0.00391389	0.00166668	0.0477819	8	2.04761	7	3.41862	0.00145651	0.875	0.00044545	0.0104385	GO Biological Process	BOTH_REGIONS
HP:0000563	Keratoconus	0.00210042	8.58653	32	3.72677	0.00782779	6.8217e-10	2.2292e-06	15	3.83927	12	3.12559	0.00249688	0.8	1.5914e-05	0.00306464	Human Phenotype	BOTH_REGIONS
HP:0100689	Decreased corneal thickness	0.00213474	8.72681	32	3.66686	0.00782779	1.0022e-09	2.2292e-06	16	4.09522	12	2.93024	0.00249688	0.75	4.8727e-05	0.00627447	Human Phenotype	BOTH_REGIONS
HP:0011486	Abnormality of corneal thickness	0.0024847	10.1574	33	3.24885	0.00807241	9.9718e-09	1.3308e-05	17	4.35117	13	2.9877	0.00270495	0.764706	1.6156e-05	0.00306464	Human Phenotype	BOTH_REGIONS
HP:0010161	Abnormality of the phalanges of the toes	0.00589993	24.1189	51	2.11452	0.0124755	1.1523e-06	0.00017942	35	8.9583	19	2.12094	0.00395339	0.542857	0.00027361	0.0210765	Human Phenotype	BOTH_REGIONS
HP:0010760	Absent toe	0.00372097	15.2113	36	2.36666	0.00880626	3.8328e-06	0.00045672	29	7.42259	16	2.15558	0.00332917	0.551724	0.00065333	0.0366358	Human Phenotype	BOTH_REGIONS
HP:0008368	Tarsal synostosis	0.00217569	8.89423	24	2.69838	0.00587084	1.985e-05	0.00153072	12	3.07142	9	2.93024	0.00187266	0.75	0.00047207	0.0305835	Human Phenotype	BOTH_REGIONS
HP:0000592	Blue sclerae	0.00521168	21.3053	43	2.01828	0.0105186	2.2183e-05	0.00159166	46	11.7738	26	2.2083	0.0054099	0.565217	8.0325e-06	0.00184832	Human Phenotype	BOTH_REGIONS
HP:0000421	Epistaxis	0.0029546	12.0784	27	2.2354	0.0066047	0.00014377	0.00599612	40	10.2381	20	1.9535	0.00416147	0.5	0.00078183	0.0407591	Human Phenotype	BOTH_REGIONS
HP:0009140	Synostosis involving bones of the feet	0.00304695	12.4559	27	2.16764	0.0066047	0.00023163	0.00840037	15	3.83927	11	2.86513	0.00228881	0.733333	0.00014431	0.0129438	Human Phenotype	BOTH_REGIONS
HP:0002647	Aortic dissection	0.00134941	5.51639	15	2.71917	0.00366928	0.00061024	0.0174771	8	2.04761	7	3.41862	0.00145651	0.875	0.00044545	0.0294307	Human Phenotype	BOTH_REGIONS
HP:0001059	Pterygium	0.00198064	8.09684	19	2.3466	0.00464775	0.0007371	0.0195185	15	3.83927	10	2.60466	0.00208073	0.666667	0.0009669	0.0485123	Human Phenotype	BOTH_REGIONS
MP:0006230	iris stroma hypoplasia	0.00071325	2.91576	21	7.20225	0.00513699	6.7588e-12	2.154e-08	6	1.53571	5	3.25583	0.00104037	0.833333	0.0051781	0.0403487	Mouse Phenotype	BOTH_REGIONS
MP:0013743	ciliary body hypoplasia	0.00140633	5.74906	28	4.87036	0.00684932	2.2772e-11	3.6288e-08	6	1.53571	6	3.90699	0.00124844	1	0.0002805	0.00411963	Mouse Phenotype	BOTH_REGIONS
MP:0005208	abnormal iris stroma morphology	0.00322153	13.1696	40	3.03729	0.00978474	1.9064e-09	1.2151e-06	18	4.60713	13	2.82172	0.00270495	0.722222	4.4455e-05	0.00090626	Mouse Phenotype	BOTH_REGIONS
MP:0006226	iris hypoplasia	0.00267722	10.9445	35	3.19796	0.00856164	5.3657e-09	2.7001e-06	13	3.32737	9	2.70484	0.00187266	0.692308	0.00118458	0.0133716	Mouse Phenotype	BOTH_REGIONS
MP:0006386	absent somites	0.0046413	18.9736	46	2.42442	0.0112525	9.9168e-08	2.205e-05	49	12.5416	21	1.67443	0.00436954	0.428571	0.00627041	0.0471686	Mouse Phenotype	BOTH_REGIONS
MP:0005211	increased stomach mucosa thickness	0.00124023	5.07006	20	3.94473	0.00489237	4.1597e-07	6.4147e-05	11	2.81547	10	3.55181	0.00208073	0.909091	1.0119e-05	0.00026065	Mouse Phenotype	BOTH_REGIONS
MP:0005203	abnormal trabecular meshwork morphology	0.00287012	11.733	32	2.72734	0.00782779	7.4336e-07	9.736e-05	15	3.83927	10	2.60466	0.00208073	0.666667	0.0009669	0.0114413	Mouse Phenotype	BOTH_REGIONS
MP:0000084	abnormal fontanelle morphology	0.00505002	20.6445	46	2.2282	0.0112525	9.6995e-07	0.00012044	28	7.16664	17	2.3721	0.00353725	0.607143	8.9391e-05	0.00163416	Mouse Phenotype	BOTH_REGIONS
MP:0010799	stomach mucosa hyperplasia	0.00133219	5.446	20	3.67242	0.00489237	1.2236e-06	0.00014623	14	3.58332	10	2.79071	0.00208073	0.714286	0.0004185	0.00582007	Mouse Phenotype	BOTH_REGIONS
MP:0000133	abnormal long bone metaphysis morphology	0.00585445	23.933	50	2.08917	0.0122309	2.0225e-06	0.00021486	48	12.2857	23	1.8721	0.00478569	0.479167	0.00070019	0.00892602	Mouse Phenotype	BOTH_REGIONS
MP:0006029	abnormal sclerotome morphology	0.00326928	13.3648	33	2.46917	0.00807241	4.0348e-06	0.00036393	26	6.65474	14	2.10377	0.00291303	0.538462	0.00193865	0.0196558	Mouse Phenotype	BOTH_REGIONS
MP:0008006	increased stomach pH	0.00146764	5.99972	20	3.33349	0.00489237	5.0593e-06	0.0004319	16	4.09522	11	2.68606	0.00228881	0.6875	0.00035458	0.00506748	Mouse Phenotype	BOTH_REGIONS
MP:0005353	abnormal patella morphology	0.00271362	11.0933	29	2.61419	0.00709393	5.2711e-06	0.00044208	22	5.63093	13	2.30868	0.00270495	0.590909	0.00088603	0.0107778	Mouse Phenotype	BOTH_REGIONS
MP:0000923	abnormal roof plate morphology	0.00160177	6.54802	21	3.20708	0.00513699	5.3194e-06	0.00044225	13	3.32737	8	2.4043	0.00166459	0.615385	0.00657729	0.0489381	Mouse Phenotype	BOTH_REGIONS
MP:0010595	abnormal aortic valve cusp morphology	0.00401002	16.393	37	2.25707	0.00905088	7.9666e-06	0.00059622	38	9.72615	21	2.15913	0.00436954	0.552632	9.3182e-05	0.00168686	Mouse Phenotype	BOTH_REGIONS
MP:0004091	abnormal Z lines	0.00401033	16.3942	37	2.25689	0.00905088	7.9796e-06	0.00059622	41	10.494	19	1.81056	0.00395339	0.463415	0.00322815	0.0293651	Mouse Phenotype	BOTH_REGIONS
MP:0010158	abnormal intestine development	0.00307917	12.5876	31	2.46273	0.00758317	8.1446e-06	0.00060365	26	6.65474	14	2.10377	0.00291303	0.538462	0.00193865	0.0196558	Mouse Phenotype	BOTH_REGIONS
MP:0004619	caudal vertebral fusion	0.00340338	13.913	33	2.37188	0.00807241	9.0361e-06	0.00064473	17	4.35117	12	2.75788	0.00249688	0.705882	0.0001269	0.00213195	Mouse Phenotype	BOTH_REGIONS
MP:0010988	abnormal bronchial cartilage morphology	0.00140651	5.74979	19	3.30447	0.00464775	9.692e-06	0.00068136	8	2.04761	6	2.93024	0.00124844	0.75	0.00479623	0.0383097	Mouse Phenotype	BOTH_REGIONS
MP:0004221	abnormal iridocorneal angle	0.00487813	19.9418	42	2.10613	0.010274	1.0472e-05	0.00072555	26	6.65474	16	2.4043	0.00332917	0.615385	0.00011513	0.00197976	Mouse Phenotype	BOTH_REGIONS
MP:0004694	absent patella	0.00104458	4.27025	16	3.74686	0.00391389	1.0674e-05	0.0007334	8	2.04761	6	2.93024	0.00124844	0.75	0.00479623	0.0383097	Mouse Phenotype	BOTH_REGIONS
MP:0008274	failure of bone ossification	0.00358976	14.675	34	2.31687	0.00831703	1.0739e-05	0.0007334	20	5.11903	11	2.14885	0.00228881	0.55	0.00477669	0.0383097	Mouse Phenotype	BOTH_REGIONS
MP:0004223	hypoplastic trabecular meshwork	0.00104925	4.28933	16	3.73018	0.00391389	1.1263e-05	0.00075306	6	1.53571	5	3.25583	0.00104037	0.833333	0.0051781	0.0403487	Mouse Phenotype	BOTH_REGIONS
MP:0005354	abnormal ilium morphology	0.00212785	8.69865	24	2.75905	0.00587084	1.3986e-05	0.00088558	10	2.55951	7	2.73489	0.00145651	0.7	0.0040426	0.0345718	Mouse Phenotype	BOTH_REGIONS
MP:0011481	anterior iris synechia	0.0039968	16.3389	36	2.20333	0.00880626	1.7214e-05	0.00102227	22	5.63093	12	2.13109	0.00249688	0.545454	0.00353177	0.0312307	Mouse Phenotype	BOTH_REGIONS
MP:0000478	delayed intestine development	0.00123632	5.05409	17	3.36361	0.00415851	2.2319e-05	0.00124789	9	2.30356	8	3.47288	0.00166459	0.888889	0.00012755	0.00213195	Mouse Phenotype	BOTH_REGIONS
MP:0004601	abnormal vertebral spinous process morphology	0.00284651	11.6365	28	2.40621	0.00684932	3.2229e-05	0.00169773	20	5.11903	11	2.14885	0.00228881	0.55	0.00477669	0.0383097	Mouse Phenotype	BOTH_REGIONS
MP:0030026	small Meckel's cartilage	0.00384177	15.7051	34	2.1649	0.00831703	4.0599e-05	0.00203229	21	5.37498	15	2.79071	0.0031211	0.714286	1.3781e-05	0.00033373	Mouse Phenotype	BOTH_REGIONS
MP:0002543	brachyphalangia	0.00338327	13.8308	31	2.24138	0.00758317	4.6579e-05	0.00227215	21	5.37498	14	2.60466	0.00291303	0.666667	8.9099e-05	0.00163416	Mouse Phenotype	BOTH_REGIONS
MP:0004222	iris synechia	0.00457272	18.6933	38	2.03282	0.0092955	5.5296e-05	0.00258809	26	6.65474	14	2.10377	0.00291303	0.538462	0.00193865	0.0196558	Mouse Phenotype	BOTH_REGIONS
MP:0000081	premature suture closure	0.00311614	12.7388	29	2.27651	0.00709393	6.1555e-05	0.00282603	13	3.32737	9	2.70484	0.00187266	0.692308	0.00118458	0.0133716	Mouse Phenotype	BOTH_REGIONS
MP:0008432	abnormal long term spatial reference memory	0.00364065	14.883	32	2.1501	0.00782779	7.5812e-05	0.0032704	28	7.16664	16	2.23257	0.00332917	0.571429	0.00038367	0.00541842	Mouse Phenotype	BOTH_REGIONS
MP:0010860	abnormal anterior commissure pars posterior morphology	0.00252853	10.3366	25	2.41859	0.00611546	7.6279e-05	0.0032704	9	2.30356	7	3.03877	0.00145651	0.777778	0.00155812	0.0164635	Mouse Phenotype	BOTH_REGIONS
MP:0008727	enlarged heart right atrium	0.0027035	11.0519	26	2.35254	0.00636008	8.5982e-05	0.00363751	13	3.32737	10	3.00538	0.00208073	0.769231	0.0001554	0.00249703	Mouse Phenotype	BOTH_REGIONS
MP:0011365	small metanephros	0.00102033	4.17113	14	3.35641	0.00342466	0.00011607	0.00462392	7	1.79166	6	3.34885	0.00124844	0.857143	0.00153315	0.0164332	Mouse Phenotype	BOTH_REGIONS
MP:0004596	abnormal mandibular angle morphology	0.00346793	14.1769	30	2.11612	0.00733855	0.00016245	0.00597364	13	3.32737	12	3.60645	0.00249688	0.923077	7.7729e-07	2.754e-05	Mouse Phenotype	BOTH_REGIONS
MP:0008004	abnormal stomach pH	0.00205017	8.3811	21	2.50564	0.00513699	0.00017175	0.00624386	19	4.86308	12	2.46757	0.00249688	0.631579	0.00060742	0.007923	Mouse Phenotype	BOTH_REGIONS
MP:0011364	abnormal metanephros morphology	0.00400342	16.366	33	2.01638	0.00807241	0.00018835	0.00662574	27	6.91069	14	2.02585	0.00291303	0.518518	0.00308561	0.0284489	Mouse Phenotype	BOTH_REGIONS
MP:0011395	decreased fetal cardiomyocyte proliferation	0.00225473	9.21732	22	2.38681	0.00538161	0.0002368	0.00780706	17	4.35117	13	2.9877	0.00270495	0.764706	1.6156e-05	0.00038139	Mouse Phenotype	BOTH_REGIONS
MP:0014077	ectopic Paneth cells	0.00210667	8.61205	21	2.43844	0.00513699	0.0002453	0.00796073	10	2.55951	8	3.12559	0.00166459	0.8	0.00049335	0.00663416	Mouse Phenotype	BOTH_REGIONS
MP:0006295	absent sclerotome	0.00180811	7.39157	19	2.5705	0.00464775	0.00025005	0.00798307	7	1.79166	7	3.90699	0.00145651	1	7.1728e-05	0.00136767	Mouse Phenotype	BOTH_REGIONS
MP:0010484	bicuspid aortic valve	0.00211864	8.66101	21	2.42466	0.00513699	0.00026404	0.00832486	22	5.63093	14	2.48627	0.00291303	0.636364	0.00018723	0.0029394	Mouse Phenotype	BOTH_REGIONS
MP:0009380	abnormal prostate gland ventral lobe morphology	0.00228697	9.34915	22	2.35316	0.00538161	0.00028631	0.00891657	13	3.32737	8	2.4043	0.00166459	0.615385	0.00657729	0.0489381	Mouse Phenotype	BOTH_REGIONS
MP:0003190	fused synovial joints	0.00184077	7.52505	19	2.5249	0.00464775	0.00031058	0.00964097	6	1.53571	5	3.25583	0.00104037	0.833333	0.0051781	0.0403487	Mouse Phenotype	BOTH_REGIONS
MP:0004360	absent ulna	0.0023178	9.47515	22	2.32186	0.00538161	0.00034189	0.0104771	11	2.81547	8	2.84145	0.00166459	0.727273	0.00140094	0.0153959	Mouse Phenotype	BOTH_REGIONS
MP:0013933	short Meckel's cartilage	0.00143303	5.85823	16	2.7312	0.00391389	0.00039075	0.0117114	12	3.07142	8	2.60466	0.00166459	0.666667	0.0032587	0.0293651	Mouse Phenotype	BOTH_REGIONS
MP:0008919	fused tarsal bones	0.00253033	10.344	23	2.22351	0.00562622	0.00045811	0.013153	15	3.83927	11	2.86513	0.00228881	0.733333	0.00014431	0.00235045	Mouse Phenotype	BOTH_REGIONS
MP:0004284	abnormal Descemet membrane	0.00117633	4.80882	14	2.91132	0.00342466	0.00047645	0.0135175	8	2.04761	6	2.93024	0.00124844	0.75	0.00479623	0.0383097	Mouse Phenotype	BOTH_REGIONS
MP:0001715	placental labyrinth hypoplasia	0.00223107	9.1206	21	2.30248	0.00513699	0.00051073	0.0141129	16	4.09522	10	2.44187	0.00208073	0.625	0.00198744	0.0200231	Mouse Phenotype	BOTH_REGIONS
MP:0011727	ectopic ovary	0.00163069	6.66625	17	2.55016	0.00415851	0.00056028	0.0152183	8	2.04761	6	2.93024	0.00124844	0.75	0.00479623	0.0383097	Mouse Phenotype	BOTH_REGIONS
MP:0003154	abnormal soft palate morphology	0.00179781	7.34946	18	2.44916	0.00440313	0.00062168	0.0164196	11	2.81547	8	2.84145	0.00166459	0.727273	0.00140094	0.0153959	Mouse Phenotype	BOTH_REGIONS
MP:0012133	absent midbrain-hindbrain boundary	0.00180096	7.36231	18	2.44488	0.00440313	0.00063401	0.0166992	10	2.55951	8	3.12559	0.00166459	0.8	0.00049335	0.00663416	Mouse Phenotype	BOTH_REGIONS
MP:0009003	abnormal vibrissa number	0.00165958	6.78437	17	2.50576	0.00415851	0.00067778	0.0176093	8	2.04761	6	2.93024	0.00124844	0.75	0.00479623	0.0383097	Mouse Phenotype	BOTH_REGIONS
MP:0002772	brachypodia	0.00081839	3.34557	11	3.28794	0.0026908	0.0007075	0.0179427	7	1.79166	6	3.34885	0.00124844	0.857143	0.00153315	0.0164332	Mouse Phenotype	BOTH_REGIONS
MP:0011771	abnormal genital tubercle morphology	0.00294946	12.0574	25	2.07341	0.00611546	0.00071756	0.0181496	10	2.55951	7	2.73489	0.00145651	0.7	0.0040426	0.0345718	Mouse Phenotype	BOTH_REGIONS
MP:0004337	clavicle hypoplasia	0.00219736	8.98282	20	2.22647	0.00489237	0.00101789	0.0235643	10	2.55951	7	2.73489	0.00145651	0.7	0.0040426	0.0345718	Mouse Phenotype	BOTH_REGIONS
MP:0012173	short rostral-caudal axis	0.00176778	7.22668	17	2.3524	0.00415851	0.00132336	0.0284673	22	5.63093	12	2.13109	0.00249688	0.545454	0.00353177	0.0312307	Mouse Phenotype	BOTH_REGIONS
MP:0011392	increased fetal cardiomyocyte apoptosis	0.00039329	1.60777	7	4.35386	0.00171233	0.00136855	0.0290771	5	1.27976	5	3.90699	0.00104037	1	0.00109677	0.0127414	Mouse Phenotype	BOTH_REGIONS
MP:0003800	monodactyly	0.00089549	3.66074	11	3.00485	0.0026908	0.00143912	0.0298439	8	2.04761	7	3.41862	0.00145651	0.875	0.00044545	0.00611921	Mouse Phenotype	BOTH_REGIONS
MP:0012535	abnormal optic fissure closure	0.00262458	10.7293	22	2.05047	0.00538161	0.0016473	0.0325409	13	3.32737	9	2.70484	0.00187266	0.692308	0.00118458	0.0133716	Mouse Phenotype	BOTH_REGIONS
MP:0008915	fused carpal bones	0.00214739	8.77853	19	2.16437	0.00464775	0.00182989	0.0345763	16	4.09522	10	2.44187	0.00208073	0.625	0.00198744	0.0200231	Mouse Phenotype	BOTH_REGIONS
MP:0011388	absent heart	0.00121405	4.96302	13	2.61937	0.00318004	0.00188119	0.0349346	15	3.83927	9	2.3442	0.00187266	0.6	0.00495842	0.0392771	Mouse Phenotype	BOTH_REGIONS
MP:0003842	abnormal metopic suture morphology	0.0015422	6.30453	15	2.37924	0.00366928	0.00221252	0.0390293	7	1.79166	7	3.90699	0.00145651	1	7.1728e-05	0.00136767	Mouse Phenotype	BOTH_REGIONS
MP:0004899	absent squamosal bone	0.00236986	9.688	20	2.06441	0.00489237	0.00241136	0.0410231	9	2.30356	7	3.03877	0.00145651	0.777778	0.00155812	0.0164635	Mouse Phenotype	BOTH_REGIONS
MP:0010980	ectopic ureteric bud	0.0024077	9.84266	20	2.03197	0.00489237	0.0028717	0.0456314	12	3.07142	8	2.60466	0.00166459	0.666667	0.0032587	0.0293651	Mouse Phenotype	BOTH_REGIONS
GO:1903313	positive regulation of mRNA metabolic process	0.00405507	14.2373	34	2.38808	0.00968385	5.768e-06	0.00281115	52	11.9996	23	1.91674	0.0053081	0.442308	0.00059583	0.0130426	GO Biological Process	METAPODIAL
GO:0001502	cartilage condensation	0.00361396	12.6886	30	2.36432	0.00854457	2.3591e-05	0.00620856	20	4.61522	11	2.38342	0.00253866	0.55	0.00198215	0.0340066	GO Biological Process	METAPODIAL
GO:0098743	cell aggregation	0.00363839	12.7744	30	2.34845	0.00854457	2.6629e-05	0.00673856	21	4.84598	11	2.26992	0.00253866	0.52381	0.00330037	0.0496873	GO Biological Process	METAPODIAL
GO:0061014	positive regulation of mRNA catabolic process	0.00245333	8.61362	23	2.67019	0.00655084	3.4018e-05	0.00778183	25	5.76903	15	2.60009	0.00346181	0.6	8.0203e-05	0.00241507	GO Biological Process	METAPODIAL
GO:0033619	membrane protein proteolysis	0.00238107	8.35992	22	2.6316	0.00626602	6.1205e-05	0.0104597	36	8.3074	17	2.04637	0.00392338	0.472222	0.00124677	0.0235383	GO Biological Process	METAPODIAL
GO:1902043	positive regulation of extrinsic apoptotic signaling pathway via death domain receptors	0.00254337	8.92977	22	2.46367	0.00626602	0.00015357	0.0184209	17	3.92294	10	2.54911	0.00230787	0.588235	0.0016152	0.0290759	GO Biological Process	METAPODIAL
GO:1900084	regulation of peptidyl-tyrosine autophosphorylation	0.00070343	2.46973	10	4.04903	0.00284819	0.00025041	0.0242291	6	1.38457	5	3.61124	0.00115394	0.833333	0.00316617	0.04819	GO Biological Process	METAPODIAL
GO:0034127	regulation of MyD88-independent toll-like receptor signaling pathway	0.00073433	2.57824	10	3.87862	0.00284819	0.00034963	0.0291609	8	1.84609	6	3.25012	0.00138472	0.75	0.00271843	0.0428919	GO Biological Process	METAPODIAL
GO:0002756	MyD88-independent toll-like receptor signaling pathway	0.00315177	11.0658	24	2.16883	0.00683566	0.00049175	0.0369766	37	8.53816	17	1.99106	0.00392338	0.45946	0.00181539	0.031474	GO Biological Process	METAPODIAL
GO:0043518	negative regulation of DNA damage response, signal transduction by p53 class mediator	0.00121785	4.27587	13	3.04032	0.00370265	0.00050234	0.0373466	13	2.99989	9	3.00011	0.00207708	0.692308	0.00052254	0.0116743	GO Biological Process	METAPODIAL
GO:0034199	activation of protein kinase A activity	0.00207023	7.26859	18	2.47641	0.00512675	0.0005475	0.0383864	17	3.92294	11	2.80402	0.00253866	0.647059	0.00029412	0.00733016	GO Biological Process	METAPODIAL
GO:1901797	negative regulation of signal transduction by p53 class mediator	0.00207807	7.29608	18	2.46708	0.00512675	0.00057139	0.0395729	28	6.46131	14	2.16674	0.00323102	0.5	0.00167635	0.0298499	GO Biological Process	METAPODIAL
GO:0033688	regulation of osteoblast proliferation	0.00301188	10.5747	23	2.175	0.00655084	0.00061212	0.0415199	23	5.3075	12	2.26095	0.00276944	0.521739	0.00225628	0.0376303	GO Biological Process	METAPODIAL
GO:0043516	regulation of DNA damage response, signal transduction by p53 class mediator	0.0030827	10.8233	23	2.12504	0.00655084	0.00082936	0.0498334	30	6.92283	15	2.16674	0.00346181	0.5	0.001152	0.022293	GO Biological Process	METAPODIAL
GO:0002102	podosome	0.00275815	9.68386	26	2.68488	0.0074053	9.9648e-06	0.00052232	29	6.69207	16	2.39089	0.00369259	0.551724	0.00018385	0.00474173	GO Cellular Component	METAPODIAL
HP:0010651	Abnormality of the meninges	0.00383958	13.4808	31	2.29957	0.00882939	2.9113e-05	0.0160398	31	7.15359	16	2.23664	0.00369259	0.516129	0.00050383	0.0219741	Human Phenotype	METAPODIAL
HP:0000882	Hypoplastic scapulae	0.00325619	11.4325	26	2.27422	0.0074053	0.00014451	0.0413605	18	4.1537	11	2.64824	0.00253866	0.611111	0.00059855	0.0248081	Human Phenotype	METAPODIAL
MP:0003560	osteoarthritis	0.00314065	11.0268	32	2.90201	0.00911421	1.9786e-07	5.9115e-05	26	5.99979	14	2.33342	0.00323102	0.538462	0.00064837	0.00884314	Mouse Phenotype	METAPODIAL
MP:0008275	failure of endochondral bone ossification	0.00218425	7.66892	24	3.12952	0.00683566	1.7803e-06	0.00029347	10	2.30761	7	3.03344	0.00161551	0.7	0.00212606	0.0228396	Mouse Phenotype	METAPODIAL
MP:0003408	increased width of hypertrophic chondrocyte zone	0.0056666	19.8954	44	2.21156	0.012532	1.9603e-06	0.0003107	48	11.0765	24	2.16674	0.00553889	0.5	4.1861e-05	0.00089738	Mouse Phenotype	METAPODIAL
MP:0008481	increased spleen germinal center number	0.00316703	11.1194	30	2.69798	0.00854457	1.9823e-06	0.0003107	33	7.61511	16	2.10108	0.00369259	0.484849	0.00121221	0.0144333	Mouse Phenotype	METAPODIAL
MP:0006429	abnormal hyaline cartilage morphology	0.00292516	10.2702	28	2.72633	0.00797494	3.5213e-06	0.00045496	24	5.53826	13	2.34731	0.00300023	0.541667	0.00093964	0.0116371	Mouse Phenotype	METAPODIAL
MP:0008274	failure of bone ossification	0.00358976	12.6037	30	2.38026	0.00854457	2.0895e-05	0.00175243	20	4.61522	11	2.38342	0.00253866	0.55	0.00198215	0.0215601	Mouse Phenotype	METAPODIAL
MP:0009095	abnormal endometrial gland number	0.00337331	11.8437	28	2.36413	0.00797494	4.3234e-05	0.0030172	23	5.3075	12	2.26095	0.00276944	0.521739	0.00225628	0.0239426	Mouse Phenotype	METAPODIAL
MP:0002543	brachyphalangia	0.00338327	11.8787	28	2.35717	0.00797494	4.5434e-05	0.00310279	21	4.84598	11	2.26992	0.00253866	0.52381	0.00330037	0.0310435	Mouse Phenotype	METAPODIAL
MP:0002657	chondrodystrophy	0.00476193	16.7191	34	2.0336	0.00968385	0.0001297	0.00700605	27	6.23055	13	2.08649	0.00300023	0.481482	0.00372793	0.0340103	Mouse Phenotype	METAPODIAL
MP:0005623	abnormal meninges morphology	0.00316056	11.0967	25	2.25292	0.00712048	0.00021987	0.0101087	24	5.53826	12	2.16674	0.00276944	0.5	0.00357292	0.0331014	Mouse Phenotype	METAPODIAL
MP:0010979	small ureteric bud	0.0007338	2.57636	10	3.88145	0.00284819	0.00034767	0.0140979	4	0.923044	4	4.33349	0.00092315	1	0.00283261	0.0280649	Mouse Phenotype	METAPODIAL
MP:0011031	abnormal branching involved in terminal bronchiole morphogenesis	0.00182781	6.41743	17	2.64904	0.00484193	0.00036789	0.0147172	11	2.53837	7	2.75767	0.00161551	0.636364	0.00468222	0.0408455	Mouse Phenotype	METAPODIAL
MP:0009022	abnormal brain meninges morphology	0.00208926	7.33537	18	2.45386	0.00512675	0.00060707	0.0206555	14	3.23066	9	2.78581	0.00207708	0.642857	0.00116308	0.0140053	Mouse Phenotype	METAPODIAL
MP:0000574	abnormal foot pad morphology	0.0035942	12.6192	26	2.06035	0.0074053	0.0006212	0.020913	26	5.99979	13	2.16674	0.00300023	0.5	0.00244441	0.025257	Mouse Phenotype	METAPODIAL
MP:0003841	abnormal lambdoidal suture morphology	0.00141882	4.98149	14	2.81041	0.00398747	0.00066663	0.021978	7	1.61533	6	3.71442	0.00138472	0.857143	0.00084589	0.0106441	Mouse Phenotype	METAPODIAL
MP:0010043	abnormal frontonasal suture morphology	0.00111028	3.89819	12	3.07835	0.00341783	0.00072966	0.0232542	6	1.38457	5	3.61124	0.00115394	0.833333	0.00316617	0.0302868	Mouse Phenotype	METAPODIAL
MP:0009919	abnormal transitional stage T1 B cell morphology	0.00246664	8.66038	19	2.1939	0.00541156	0.00157328	0.0395845	27	6.23055	15	2.40749	0.00346181	0.555556	0.00026414	0.00420903	Mouse Phenotype	METAPODIAL
MP:0013743	ciliary body hypoplasia	0.00140633	4.93761	13	2.63286	0.00370265	0.00179815	0.0434353	6	1.38457	5	3.61124	0.00115394	0.833333	0.00316617	0.0302868	Mouse Phenotype	METAPODIAL
MP:0005097	polychromatophilia	0.00288675	10.1354	21	2.07195	0.0059812	0.00182841	0.0435946	34	7.84588	15	1.91183	0.00346181	0.441177	0.00533932	0.0451763	Mouse Phenotype	METAPODIAL
MP:0011526	abnormal placenta fetal blood space morphology	0.00024245	0.851228	5	5.87387	0.0014241	0.00184253	0.0438219	4	0.923044	4	4.33349	0.00092315	1	0.00283261	0.0280649	Mouse Phenotype	METAPODIAL
MP:0009920	abnormal transitional stage T2 B cell morphology	0.00271733	9.54054	20	2.09632	0.00569638	0.00202754	0.0468244	29	6.69207	15	2.24146	0.00346181	0.517241	0.00073093	0.00957316	Mouse Phenotype	METAPODIAL
MP:0000081	premature suture closure	0.00311614	10.9408	22	2.01083	0.00626602	0.00207672	0.0477295	13	2.99989	9	3.00011	0.00207708	0.692308	0.00052254	0.0073906	Mouse Phenotype	METAPODIAL
MP:0000932	absent notochord	0.00292665	10.2755	21	2.0437	0.0059812	0.00214392	0.0488049	23	5.3075	13	2.44936	0.00300023	0.565217	0.00054546	0.00765288	Mouse Phenotype	METAPODIAL
MP:0008167	increased B-1a cell number	0.00179509	6.30255	15	2.37999	0.00427229	0.00220289	0.0494409	19	4.38446	10	2.28078	0.00230787	0.526316	0.00484194	0.0417061	Mouse Phenotype	METAPODIAL
GO:0061036	positive regulation of cartilage development	0.00655467	31.7836	93	2.92604	0.0191792	7.0471e-19	1.7497e-16	29	7.59711	19	2.50095	0.00386257	0.655172	1.0092e-05	0.00035319	GO Biological Process	PHALANGEAL
GO:0060021	palate development	0.0160527	77.8395	161	2.06836	0.0332027	5.8041e-17	8.3929e-15	92	24.1012	49	2.03309	0.00996137	0.532609	2.9447e-08	1.9183e-06	GO Biological Process	PHALANGEAL
GO:0042733	embryonic digit morphogenesis	0.0114377	55.4616	126	2.27184	0.0259847	2.0083e-16	2.6428e-14	63	16.5041	31	1.87832	0.00630209	0.492063	7.5364e-05	0.00202804	GO Biological Process	PHALANGEAL
GO:0001837	epithelial to mesenchymal transition	0.0112123	54.3683	124	2.28074	0.0255723	2.626e-16	3.3226e-14	66	17.29	34	1.96646	0.00691197	0.515151	9.8424e-06	0.00034538	GO Biological Process	PHALANGEAL
GO:0001707	mesoderm formation	0.010219	49.5518	114	2.30062	0.02351	2.323e-15	2.5263e-13	67	17.552	38	2.165	0.00772515	0.567164	1.1749e-07	6.7218e-06	GO Biological Process	PHALANGEAL
GO:0048048	embryonic eye morphogenesis	0.0060632	29.4005	81	2.75506	0.0167045	2.999e-15	3.1826e-13	34	8.90696	24	2.69452	0.00487904	0.705882	7.7326e-08	4.6676e-06	GO Biological Process	PHALANGEAL
GO:0048332	mesoderm morphogenesis	0.0107504	52.1286	116	2.22527	0.0239225	1.2025e-14	1.0989e-12	69	18.0759	39	2.15757	0.00792844	0.565217	9.1132e-08	5.3776e-06	GO Biological Process	PHALANGEAL
GO:0072132	mesenchyme morphogenesis	0.00877871	42.568	101	2.37268	0.020829	1.4272e-14	1.2952e-12	43	11.2647	27	2.39687	0.00548892	0.627907	4.8652e-07	2.3624e-05	GO Biological Process	PHALANGEAL
GO:0030510	regulation of BMP signaling pathway	0.0133074	64.5274	134	2.07664	0.0276346	1.7472e-14	1.5431e-12	85	22.2674	44	1.97598	0.00894491	0.517647	4.2888e-07	2.1142e-05	GO Biological Process	PHALANGEAL
GO:0048596	embryonic camera-type eye morphogenesis	0.00462425	22.423	67	2.988	0.0138173	1.9055e-14	1.6606e-12	25	6.54924	19	2.9011	0.00386257	0.76	2.7689e-07	1.4345e-05	GO Biological Process	PHALANGEAL
GO:0010595	positive regulation of endothelial cell migration	0.0123856	60.0577	126	2.09798	0.0259847	5.2438e-14	4.182e-12	75	19.6477	34	1.73048	0.00691197	0.453333	0.00026484	0.00605232	GO Biological Process	PHALANGEAL
GO:0061035	regulation of cartilage development	0.012862	62.3677	129	2.06838	0.0266034	7.0184e-14	5.3695e-12	62	16.2421	37	2.27803	0.00752185	0.596774	2.7126e-08	1.7933e-06	GO Biological Process	PHALANGEAL
GO:0031076	embryonic camera-type eye development	0.00599251	29.0577	77	2.6499	0.0158796	9.7093e-14	7.1377e-12	37	9.69287	24	2.47605	0.00487904	0.648649	8.8963e-07	3.9819e-05	GO Biological Process	PHALANGEAL
GO:0040036	regulation of fibroblast growth factor receptor signaling pathway	0.00699562	33.9218	85	2.50576	0.0175294	1.0173e-13	7.4364e-12	26	6.81121	16	2.34907	0.00325269	0.615385	0.00015519	0.00378885	GO Biological Process	PHALANGEAL
GO:0060900	embryonic camera-type eye formation	0.0026429	12.8154	47	3.66745	0.00969272	1.4699e-13	1.018e-11	12	3.14363	10	3.18103	0.00203293	0.833333	5.8023e-05	0.00159734	GO Biological Process	PHALANGEAL
GO:0009880	embryonic pattern specification	0.0105707	51.2573	111	2.16554	0.0228913	2.3841e-13	1.5765e-11	65	17.028	34	1.99671	0.00691197	0.523077	6.3683e-06	0.00023672	GO Biological Process	PHALANGEAL
GO:0002072	optic cup morphogenesis involved in camera-type eye development	0.00191193	9.27096	39	4.20668	0.0080429	2.8626e-13	1.8648e-11	8	2.09576	7	3.34008	0.00142305	0.875	0.00052064	0.0107385	GO Biological Process	PHALANGEAL
GO:1905331	negative regulation of morphogenesis of an epithelium	0.00380842	18.4671	57	3.08658	0.011755	4.5263e-13	2.7963e-11	18	4.71545	11	2.33276	0.00223623	0.611111	0.00187623	0.03067	GO Biological Process	PHALANGEAL
GO:0042475	odontogenesis of dentin-containing tooth	0.0117106	56.7847	118	2.07803	0.0243349	5.9698e-13	3.5546e-11	76	19.9097	40	2.00907	0.00813173	0.526316	8.0931e-07	3.7107e-05	GO Biological Process	PHALANGEAL
GO:0060602	branch elongation of an epithelium	0.00493453	23.9275	66	2.75833	0.013611	9.7902e-13	5.6257e-11	16	4.19151	12	2.86293	0.00243952	0.75	6.258e-05	0.00170495	GO Biological Process	PHALANGEAL
GO:0001942	hair follicle development	0.010438	50.6138	107	2.11405	0.0220664	2.5969e-12	1.3891e-10	73	19.1238	36	1.88247	0.00731856	0.493151	1.9238e-05	0.00061896	GO Biological Process	PHALANGEAL
GO:0010464	regulation of mesenchymal cell proliferation	0.00905871	43.9257	96	2.18551	0.0197979	5.8136e-12	2.8978e-10	36	9.4309	27	2.86293	0.00548892	0.75	1.2972e-09	1.1612e-07	GO Biological Process	PHALANGEAL
GO:0040037	negative regulation of fibroblast growth factor receptor signaling pathway	0.0042027	20.3789	58	2.84608	0.0119612	6.7608e-12	3.3073e-10	12	3.14363	10	3.18103	0.00203293	0.833333	5.8023e-05	0.00159734	GO Biological Process	PHALANGEAL
GO:0098773	skin epidermis development	0.0106439	51.6123	107	2.07315	0.0220664	7.9613e-12	3.8374e-10	75	19.6477	36	1.83228	0.00731856	0.48	4.0458e-05	0.00117785	GO Biological Process	PHALANGEAL
GO:0048841	regulation of axon extension involved in axon guidance	0.00445885	21.6209	60	2.77509	0.0123737	8.0332e-12	3.858e-10	16	4.19151	10	2.38578	0.00203293	0.625	0.0024044	0.0380739	GO Biological Process	PHALANGEAL
GO:0007223	Wnt signaling pathway, calcium modulating pathway	0.0057072	27.6742	70	2.52943	0.014436	9.5523e-12	4.5708e-10	37	9.69287	20	2.06337	0.00406587	0.54054	0.00028743	0.00654361	GO Biological Process	PHALANGEAL
GO:0048340	paraxial mesoderm morphogenesis	0.00220903	10.7116	39	3.64092	0.0080429	2.0024e-11	9.1812e-10	10	2.61969	8	3.05379	0.00162635	0.8	0.00058607	0.0118102	GO Biological Process	PHALANGEAL
GO:0022405	hair cycle process	0.0108606	52.6631	107	2.03178	0.0220664	2.4791e-11	1.1211e-09	76	19.9097	36	1.80817	0.00731856	0.473684	5.7618e-05	0.00159734	GO Biological Process	PHALANGEAL
GO:0060443	mammary gland morphogenesis	0.00784879	38.0588	85	2.23339	0.0175294	3.2486e-11	1.4442e-09	41	10.7408	20	1.86207	0.00406587	0.487805	0.00158453	0.0272205	GO Biological Process	PHALANGEAL
GO:0032332	positive regulation of chondrocyte differentiation	0.00426301	20.6713	57	2.75744	0.011755	3.3214e-11	1.4666e-09	18	4.71545	14	2.96896	0.00284611	0.777778	7.0892e-06	0.00026058	GO Biological Process	PHALANGEAL
GO:0060039	pericardium development	0.00405794	19.677	55	2.79515	0.0113425	4.4548e-11	1.9475e-09	20	5.23939	14	2.67207	0.00284611	0.7	5.1545e-05	0.00144009	GO Biological Process	PHALANGEAL
GO:0061180	mammary gland epithelium development	0.00917886	44.5083	94	2.11197	0.0193854	5.5955e-11	2.3906e-09	54	14.1463	26	1.83793	0.00528563	0.481482	0.00043286	0.00917222	GO Biological Process	PHALANGEAL
GO:0048341	paraxial mesoderm formation	0.00161714	7.8415	32	4.08085	0.0065993	7.6961e-11	3.2564e-09	7	1.83379	6	3.27192	0.00121976	0.857143	0.00175103	0.0293153	GO Biological Process	PHALANGEAL
GO:0002053	positive regulation of mesenchymal cell proliferation	0.00698228	33.8571	77	2.27427	0.0158796	1.1959e-10	4.933e-09	28	7.33514	21	2.86293	0.00426916	0.75	9.4041e-08	5.4756e-06	GO Biological Process	PHALANGEAL
GO:0045992	negative regulation of embryonic development	0.00488019	23.664	60	2.53549	0.0123737	2.5098e-10	9.771e-09	26	6.81121	14	2.05544	0.00284611	0.538462	0.00246216	0.0387554	GO Biological Process	PHALANGEAL
GO:0050922	negative regulation of chemotaxis	0.00580882	28.167	67	2.37867	0.0138173	3.1598e-10	1.1983e-08	36	9.4309	19	2.01465	0.00386257	0.527778	0.0006051	0.012048	GO Biological Process	PHALANGEAL
GO:1902667	regulation of axon guidance	0.00560092	27.1588	65	2.39333	0.0134048	4.5306e-10	1.6747e-08	21	5.50136	12	2.18128	0.00243952	0.571429	0.00258947	0.0404824	GO Biological Process	PHALANGEAL
GO:0003156	regulation of animal organ formation	0.00852612	41.3431	86	2.08015	0.0177356	7.202e-10	2.5614e-08	33	8.64499	24	2.77617	0.00487904	0.727273	3.0298e-08	1.964e-06	GO Biological Process	PHALANGEAL
GO:0003401	axis elongation	0.00635095	30.7957	70	2.27304	0.014436	8.2454e-10	2.9167e-08	26	6.81121	16	2.34907	0.00325269	0.615385	0.00015519	0.00378885	GO Biological Process	PHALANGEAL
GO:0060685	regulation of prostatic bud formation	0.00265114	12.8554	40	3.11154	0.00824912	9.9453e-10	3.4532e-08	6	1.57182	6	3.81724	0.00121976	1	0.0003225	0.00716848	GO Biological Process	PHALANGEAL
GO:0060317	cardiac epithelial to mesenchymal transition	0.00478428	23.199	57	2.45701	0.011755	2.0729e-09	6.7687e-08	27	7.07317	16	2.26207	0.00325269	0.592593	0.00028842	0.00654361	GO Biological Process	PHALANGEAL
GO:0035116	embryonic hindlimb morphogenesis	0.00630202	30.5585	68	2.22524	0.0140235	3.2403e-09	1.0274e-07	29	7.59711	20	2.63258	0.00406587	0.689655	1.7348e-06	7.2469e-05	GO Biological Process	PHALANGEAL
GO:0002067	glandular epithelial cell differentiation	0.00692937	33.6005	72	2.14283	0.0148484	5.1868e-09	1.6098e-07	39	10.2168	20	1.95756	0.00406587	0.512821	0.00071037	0.0138076	GO Biological Process	PHALANGEAL
GO:0035137	hindlimb morphogenesis	0.00763216	37.0083	77	2.08061	0.0158796	5.3425e-09	1.6503e-07	37	9.69287	23	2.37288	0.00467575	0.621622	4.4282e-06	0.00016989	GO Biological Process	PHALANGEAL
GO:0030513	positive regulation of BMP signaling pathway	0.00516304	25.0356	57	2.27676	0.011755	2.71e-08	7.3528e-07	32	8.38302	16	1.90862	0.00325269	0.5	0.00333423	0.0495205	GO Biological Process	PHALANGEAL
GO:1901213	regulation of transcription from RNA polymerase II promoter involved in heart development	0.00282851	13.7155	38	2.7706	0.00783667	4.9907e-08	1.2979e-06	13	3.4056	9	2.6427	0.00182964	0.692308	0.00142023	0.0248852	GO Biological Process	PHALANGEAL
GO:0030540	female genitalia development	0.00310587	15.0604	40	2.65598	0.00824912	6.7491e-08	1.7112e-06	18	4.71545	12	2.54483	0.00243952	0.666667	0.00036944	0.00804886	GO Biological Process	PHALANGEAL
GO:0060441	epithelial tube branching involved in lung morphogenesis	0.00592794	28.7446	60	2.08735	0.0123737	2.1742e-07	5.0282e-06	25	6.54924	15	2.29034	0.0030494	0.6	0.00037071	0.0080492	GO Biological Process	PHALANGEAL
GO:2000179	positive regulation of neural precursor cell proliferation	0.00679408	32.9445	66	2.00337	0.013611	2.3407e-07	5.366e-06	48	12.5745	27	2.1472	0.00548892	0.5625	9.7507e-06	0.00034307	GO Biological Process	PHALANGEAL
GO:0002052	positive regulation of neuroblast proliferation	0.00430792	20.8891	48	2.29785	0.00989895	2.4796e-07	5.6549e-06	21	5.50136	15	2.7266	0.0030494	0.714286	1.8692e-05	0.00060435	GO Biological Process	PHALANGEAL
GO:0048333	mesodermal cell differentiation	0.00433702	21.0302	48	2.28243	0.00989895	2.9913e-07	6.6944e-06	26	6.81121	16	2.34907	0.00325269	0.615385	0.00015519	0.00378885	GO Biological Process	PHALANGEAL
GO:1902692	regulation of neuroblast proliferation	0.00501842	24.3343	53	2.178	0.0109301	3.0827e-07	6.8407e-06	28	7.33514	17	2.31761	0.00345599	0.607143	0.00012239	0.00310314	GO Biological Process	PHALANGEAL
GO:0001702	gastrulation with mouth forming second	0.00476487	23.1049	51	2.20733	0.0105176	3.4635e-07	7.5961e-06	27	7.07317	16	2.26207	0.00325269	0.592593	0.00028842	0.00654361	GO Biological Process	PHALANGEAL
GO:0010463	mesenchymal cell proliferation	0.00518356	25.1351	54	2.14839	0.0111363	3.6195e-07	7.8987e-06	17	4.45348	14	3.14361	0.00284611	0.823529	2.0809e-06	8.5839e-05	GO Biological Process	PHALANGEAL
GO:0035115	embryonic forelimb morphogenesis	0.00596398	28.9193	59	2.04016	0.0121675	5.5967e-07	1.1784e-05	32	8.38302	20	2.38578	0.00406587	0.625	1.6716e-05	0.00055129	GO Biological Process	PHALANGEAL
GO:0021871	forebrain regionalization	0.00422688	20.4962	46	2.24432	0.00948649	8.1255e-07	1.6577e-05	24	6.28727	17	2.70388	0.00345599	0.708333	6.0544e-06	0.00022633	GO Biological Process	PHALANGEAL
GO:0090103	cochlea morphogenesis	0.00410295	19.8952	45	2.26185	0.00928026	8.6805e-07	1.76e-05	24	6.28727	14	2.22672	0.00284611	0.583333	0.00086506	0.0163319	GO Biological Process	PHALANGEAL
GO:0003203	endocardial cushion morphogenesis	0.00580662	28.1563	57	2.02441	0.011755	1.0844e-06	2.1587e-05	28	7.33514	17	2.31761	0.00345599	0.607143	0.00012239	0.00310314	GO Biological Process	PHALANGEAL
GO:0060592	mammary gland formation	0.00297822	14.4414	36	2.49284	0.00742421	1.2406e-06	2.4513e-05	7	1.83379	6	3.27192	0.00121976	0.857143	0.00175103	0.0293153	GO Biological Process	PHALANGEAL
GO:0070166	enamel mineralization	0.00217687	10.5556	29	2.74735	0.00598062	2.0889e-06	3.9753e-05	11	2.88166	9	3.1232	0.00182964	0.818182	0.00018599	0.00437823	GO Biological Process	PHALANGEAL
GO:0060449	bud elongation involved in lung branching	0.00248223	12.0364	31	2.57553	0.00639307	3.4495e-06	6.2782e-05	6	1.57182	6	3.81724	0.00121976	1	0.0003225	0.00716848	GO Biological Process	PHALANGEAL
GO:0043586	tongue development	0.00354288	17.1794	39	2.27016	0.0080429	4.0923e-06	7.3768e-05	21	5.50136	13	2.36305	0.00264281	0.619048	0.0006042	0.012048	GO Biological Process	PHALANGEAL
GO:1902893	regulation of pri-miRNA transcription from RNA polymerase II promoter	0.00381387	18.4935	41	2.217	0.00845535	4.1265e-06	7.4181e-05	29	7.59711	15	1.97443	0.0030494	0.517241	0.00292108	0.0449573	GO Biological Process	PHALANGEAL
GO:0021521	ventral spinal cord interneuron specification	0.0022705	11.0097	29	2.63405	0.00598062	4.6089e-06	8.2068e-05	11	2.88166	9	3.1232	0.00182964	0.818182	0.00018599	0.00437823	GO Biological Process	PHALANGEAL
GO:0002043	blood vessel endothelial cell proliferation involved in sprouting angiogenesis	0.00149465	7.24757	22	3.0355	0.00453702	7.54e-06	0.00013021	7	1.83379	6	3.27192	0.00121976	0.857143	0.00175103	0.0293153	GO Biological Process	PHALANGEAL
GO:0034505	tooth mineralization	0.00249533	12.0999	29	2.39672	0.00598062	2.542e-05	0.00040399	14	3.66757	9	2.45394	0.00182964	0.642857	0.0030526	0.0461184	GO Biological Process	PHALANGEAL
GO:0071679	commissural neuron axon guidance	0.00165063	8.00391	22	2.74865	0.00453702	3.2996e-05	0.00051263	8	2.09576	7	3.34008	0.00142305	0.875	0.00052064	0.0107385	GO Biological Process	PHALANGEAL
GO:0097186	amelogenesis	0.00294707	14.2903	32	2.23928	0.0065993	3.6384e-05	0.00055607	20	5.23939	12	2.29034	0.00243952	0.6	0.00145503	0.0252929	GO Biological Process	PHALANGEAL
GO:0043584	nose development	0.00198029	9.60244	23	2.39522	0.00474325	0.00016569	0.00222937	16	4.19151	11	2.62435	0.00223623	0.6875	0.00044191	0.00933397	GO Biological Process	PHALANGEAL
GO:0006702	androgen biosynthetic process	0.00097327	4.7194	14	2.96648	0.00288719	0.00039792	0.00488911	11	2.88166	8	2.77617	0.00162635	0.727273	0.00165294	0.028175	GO Biological Process	PHALANGEAL
GO:0060710	chorio-allantoic fusion	0.00171803	8.33074	20	2.40075	0.00412456	0.00041277	0.00504796	7	1.83379	6	3.27192	0.00121976	0.857143	0.00175103	0.0293153	GO Biological Process	PHALANGEAL
GO:0061299	retina vasculature morphogenesis in camera-type eye	0.00129576	6.28313	16	2.5465	0.00329965	0.00081405	0.00920284	9	2.35772	8	3.3931	0.00162635	0.888889	0.00015256	0.0037666	GO Biological Process	PHALANGEAL
GO:0043587	tongue morphogenesis	0.00134575	6.52555	16	2.4519	0.00329965	0.00119594	0.0128748	9	2.35772	7	2.96896	0.00142305	0.777778	0.00180891	0.0299415	GO Biological Process	PHALANGEAL
GO:0030575	nuclear body organization	0.00145783	7.069	16	2.26341	0.00329965	0.00262354	0.025181	11	2.88166	8	2.77617	0.00162635	0.727273	0.00165294	0.028175	GO Biological Process	PHALANGEAL
GO:0038065	collagen-activated signaling pathway	0.0012754	6.18442	14	2.26375	0.00288719	0.00466817	0.0402281	11	2.88166	9	3.1232	0.00182964	0.818182	0.00018599	0.00437823	GO Biological Process	PHALANGEAL
GO:0060982	coronary artery morphogenesis	0.00159201	7.71966	16	2.07263	0.00329965	0.0059532	0.0493003	9	2.35772	7	2.96896	0.00142305	0.777778	0.00180891	0.0299415	GO Biological Process	PHALANGEAL
GO:0070411	I-SMAD binding	0.0020989	10.1775	25	2.45639	0.0051557	6.0333e-05	0.00404328	11	2.88166	9	3.1232	0.00182964	0.818182	0.00018599	0.0133093	GO Molecular Function	PHALANGEAL
GO:0005024	transforming growth factor beta-activated receptor activity	0.00150141	7.28035	20	2.74712	0.00412456	7.3798e-05	0.00472081	9	2.35772	8	3.3931	0.00162635	0.888889	0.00015256	0.0113005	GO Molecular Function	PHALANGEAL
GO:0050431	transforming growth factor beta binding	0.00246544	11.9549	27	2.25848	0.00556816	0.00012285	0.00707095	19	4.97742	12	2.41089	0.00243952	0.631579	0.00076367	0.0379317	GO Molecular Function	PHALANGEAL
HP:0009774	Triangular shaped phalanges of the hand	0.0123962	60.1091	129	2.1461	0.0266034	5.4073e-15	4.1792e-12	76	19.9097	35	1.75794	0.00711527	0.460526	0.00014761	0.00834756	Human Phenotype	PHALANGEAL
HP:0010944	Abnormality of the renal pelvis	0.0120306	58.3363	122	2.09132	0.0251598	1.6117e-13	7.1701e-11	70	18.3379	33	1.79956	0.00670868	0.471429	0.00012973	0.00766073	Human Phenotype	PHALANGEAL
HP:0000126	Hydronephrosis	0.0116408	56.4464	119	2.10819	0.0245411	1.9049e-13	7.6869e-11	68	17.8139	31	1.74021	0.00630209	0.455882	0.00043068	0.0176313	Human Phenotype	PHALANGEAL
HP:0009602	Abnormality of thumb phalanx	0.0108101	52.4183	112	2.13666	0.0230976	4.2537e-13	1.3828e-10	70	18.3379	30	1.63596	0.0060988	0.428571	0.0018082	0.0475232	Human Phenotype	PHALANGEAL
HP:0006292	Abnormality of dental eruption	0.0115844	56.1726	115	2.04726	0.0237162	2.8909e-12	6.4303e-10	76	19.9097	32	1.60726	0.00650539	0.421053	0.00183951	0.0479494	Human Phenotype	PHALANGEAL
HP:0000668	Hypodontia	0.00788033	38.2117	78	2.04126	0.0160858	9.406e-09	4.3588e-07	61	15.9801	29	1.81475	0.00589551	0.47541	0.00027186	0.012511	Human Phenotype	PHALANGEAL
HP:0000236	Abnormality of the anterior fontanelle	0.00813361	39.4399	79	2.00305	0.016292	1.6532e-08	7.2578e-07	58	15.1942	27	1.77699	0.00548892	0.465517	0.00066165	0.0238659	Human Phenotype	PHALANGEAL
HP:0006481	Abnormality of primary teeth	0.0041363	20.0569	47	2.34333	0.00969272	1.9125e-07	6.413e-06	24	6.28727	14	2.22672	0.00284611	0.583333	0.00086506	0.029103	Human Phenotype	PHALANGEAL
HP:0003275	Narrow pelvis bone	0.00105345	5.10819	17	3.32799	0.00350588	2.5509e-05	0.00046509	7	1.83379	6	3.27192	0.00121976	0.857143	0.00175103	0.0473062	Human Phenotype	PHALANGEAL
HP:0008368	Tarsal synostosis	0.00217569	10.5499	25	2.36969	0.0051557	0.0001045	0.00163685	12	3.14363	9	2.86293	0.00182964	0.75	0.00056989	0.0210341	Human Phenotype	PHALANGEAL
HP:0001360	Holoprosencephaly	0.00290877	14.1046	30	2.12696	0.00618684	0.00014989	0.00224263	14	3.66757	10	2.7266	0.00203293	0.714286	0.00051336	0.0200823	Human Phenotype	PHALANGEAL
HP:0002617	Dilatation	0.00282512	13.699	28	2.04394	0.00577439	0.00044917	0.00570919	25	6.54924	15	2.29034	0.0030494	0.6	0.00037071	0.01527	Human Phenotype	PHALANGEAL
MP:0000088	short mandible	0.0179633	87.104	176	2.02057	0.0362961	1.7831e-17	2.2432e-15	93	24.3632	56	2.29855	0.0113844	0.602151	4.6362e-12	3.1437e-10	Mouse Phenotype	PHALANGEAL
MP:0011772	genital tubercle hypoplasia	0.00200394	9.71709	45	4.63102	0.00928026	1.5447e-16	1.6229e-14	7	1.83379	7	3.81724	0.00142305	1	8.4408e-05	0.00117643	Mouse Phenotype	PHALANGEAL
MP:0014139	abnormal ectoderm morphology	0.00906686	43.9652	108	2.45649	0.0222726	1.8935e-16	1.9467e-14	45	11.7886	33	2.79931	0.00670868	0.733333	5.1158e-11	2.7954e-09	Mouse Phenotype	PHALANGEAL
MP:0001676	abnormal apical ectodermal ridge morphology	0.00794113	38.5065	99	2.57099	0.0204166	2.0868e-16	2.0784e-14	39	10.2168	29	2.83846	0.00589551	0.74359	4.4315e-10	2.0872e-08	Mouse Phenotype	PHALANGEAL
MP:0003257	abnormal abdominal wall morphology	0.0149228	72.3609	148	2.0453	0.0305218	2.5014e-15	2.1741e-13	95	24.8871	50	2.00907	0.0101647	0.526316	3.559e-08	1.1982e-06	Mouse Phenotype	PHALANGEAL
MP:0003120	abnormal tracheal cartilage morphology	0.00831169	40.3034	98	2.43156	0.0202103	8.3288e-15	6.8648e-13	36	9.4309	24	2.54483	0.00487904	0.666667	4.1615e-07	1.124e-05	Mouse Phenotype	PHALANGEAL
MP:0003052	omphalocele	0.0106368	51.5781	115	2.22963	0.0237162	1.3748e-14	1.0954e-12	62	16.2421	37	2.27803	0.00752185	0.596774	2.7126e-08	9.2959e-07	Mouse Phenotype	PHALANGEAL
MP:0004726	abnormal nasal capsule morphology	0.00756511	36.6832	90	2.45344	0.0185605	6.2081e-14	4.4295e-12	30	7.85908	22	2.79931	0.00447245	0.733333	9.0768e-08	2.7904e-06	Mouse Phenotype	PHALANGEAL
MP:0004355	short radius	0.0100927	48.9394	108	2.20681	0.0222726	1.6047e-13	1.0551e-11	55	14.4083	25	1.73511	0.00508233	0.454545	0.00157766	0.0140709	Mouse Phenotype	PHALANGEAL
MP:0000106	abnormal basisphenoid bone morphology	0.0125944	61.0703	126	2.0632	0.0259847	1.6112e-13	1.0551e-11	60	15.7182	36	2.29034	0.00731856	0.6	3.4262e-08	1.1616e-06	Mouse Phenotype	PHALANGEAL
MP:0011771	abnormal genital tubercle morphology	0.00294946	14.3019	49	3.42611	0.0101052	5.1378e-13	3.1489e-11	10	2.61969	9	3.43552	0.00182964	0.9	4.4189e-05	0.00069374	Mouse Phenotype	PHALANGEAL
MP:0000561	adactyly	0.00321852	15.6066	51	3.26785	0.0105176	9.7339e-13	5.7096e-11	9	2.35772	9	3.81724	0.00182964	1	5.7797e-06	0.00011757	Mouse Phenotype	PHALANGEAL
MP:0000081	premature suture closure	0.00311614	15.1102	50	3.30903	0.0103114	1.0362e-12	6.041e-11	13	3.4056	11	3.22997	0.00223623	0.846154	1.7844e-05	0.0003177	Mouse Phenotype	PHALANGEAL
MP:0000084	abnormal fontanelle morphology	0.00505002	24.4875	65	2.65441	0.0134048	7.1818e-12	3.8794e-10	28	7.33514	21	2.86293	0.00426916	0.75	9.4041e-08	2.8635e-06	Mouse Phenotype	PHALANGEAL
MP:0002544	brachydactyly	0.00575933	27.927	69	2.47073	0.0142297	3.6045e-11	1.7231e-09	36	9.4309	19	2.01465	0.00386257	0.527778	0.0006051	0.00631586	Mouse Phenotype	PHALANGEAL
MP:0004423	abnormal squamosal bone morphology	0.00632241	30.6574	73	2.38116	0.0150546	5.0301e-11	2.3575e-09	36	9.4309	24	2.54483	0.00487904	0.666667	4.1615e-07	1.124e-05	Mouse Phenotype	PHALANGEAL
MP:0004452	abnormal pterygoid process morphology	0.00593508	28.7792	70	2.43231	0.014436	5.0748e-11	2.3669e-09	29	7.59711	24	3.1591	0.00487904	0.827586	2.9443e-10	1.4363e-08	Mouse Phenotype	PHALANGEAL
MP:0002543	brachyphalangia	0.00338327	16.4055	49	2.98681	0.0101052	5.6135e-11	2.5928e-09	21	5.50136	14	2.54483	0.00284611	0.666667	0.00011725	0.00156788	Mouse Phenotype	PHALANGEAL
MP:0002982	abnormal primordial germ cell migration	0.00282475	13.6972	44	3.21233	0.00907404	5.6751e-11	2.5961e-09	11	2.88166	9	3.1232	0.00182964	0.818182	0.00018599	0.00231844	Mouse Phenotype	PHALANGEAL
MP:0004506	abnormal pubis morphology	0.00624886	30.3007	72	2.37618	0.0148484	7.4184e-11	3.2685e-09	24	6.28727	17	2.70388	0.00345599	0.708333	6.0544e-06	0.00012264	Mouse Phenotype	PHALANGEAL
MP:0000484	abnormal pulmonary artery morphology	0.0107054	51.9103	104	2.00346	0.0214477	9.9678e-11	4.3319e-09	67	17.552	34	1.93711	0.00691197	0.507463	1.4977e-05	0.00027537	Mouse Phenotype	PHALANGEAL
MP:0004322	abnormal sternebra morphology	0.00930018	45.0966	94	2.08441	0.0193854	1.0862e-10	4.6778e-09	64	16.766	28	1.67004	0.00569221	0.4375	0.00174493	0.0151097	Mouse Phenotype	PHALANGEAL
MP:0004343	small scapula	0.00710205	34.4378	78	2.26495	0.0160858	1.0937e-10	4.6893e-09	28	7.33514	17	2.31761	0.00345599	0.607143	0.00012239	0.00162298	Mouse Phenotype	PHALANGEAL
MP:0020363	abnormal germ cell physiology	0.00421296	20.4287	55	2.6923	0.0113425	1.6943e-10	7.105e-09	22	5.76333	13	2.25564	0.00264281	0.590909	0.00112359	0.0107002	Mouse Phenotype	PHALANGEAL
MP:0008273	abnormal intramembranous bone ossification	0.0102762	49.8293	100	2.00685	0.0206228	2.0667e-10	8.4443e-09	59	15.4562	34	2.19977	0.00691197	0.576271	3.216e-07	8.8868e-06	Mouse Phenotype	PHALANGEAL
MP:0000125	absent incisors	0.00563454	27.3219	66	2.41565	0.013611	2.3217e-10	9.406e-09	32	8.38302	23	2.74364	0.00467575	0.71875	8.4856e-08	2.6427e-06	Mouse Phenotype	PHALANGEAL
MP:0013496	abnormal trachea development	0.00222783	10.8027	37	3.42506	0.00763044	3.3413e-10	1.283e-08	7	1.83379	6	3.27192	0.00121976	0.857143	0.00175103	0.0151097	Mouse Phenotype	PHALANGEAL
MP:0003235	abnormal alisphenoid bone morphology	0.00583379	28.2881	67	2.36849	0.0138173	3.7461e-10	1.4101e-08	33	8.64499	22	2.54483	0.00447245	0.666667	1.2749e-06	3.0859e-05	Mouse Phenotype	PHALANGEAL
MP:0003842	abnormal metopic suture morphology	0.0015422	7.47815	30	4.01169	0.00618684	4.3546e-10	1.62e-08	7	1.83379	6	3.27192	0.00121976	0.857143	0.00175103	0.0151097	Mouse Phenotype	PHALANGEAL
MP:0006020	decreased tympanic ring size	0.00421462	20.4367	54	2.64231	0.0111363	4.7031e-10	1.7295e-08	22	5.76333	18	3.1232	0.00365928	0.818182	7.7535e-08	2.4305e-06	Mouse Phenotype	PHALANGEAL
MP:0000030	abnormal tympanic ring morphology	0.00937631	45.4657	92	2.0235	0.018973	7.1809e-10	2.4511e-08	50	13.0985	34	2.59572	0.00691197	0.68	7.1121e-10	3.238e-08	Mouse Phenotype	PHALANGEAL
MP:0005104	abnormal tarsal bone morphology	0.00835835	40.5296	84	2.07256	0.0173232	1.3269e-09	4.3004e-08	45	11.7886	25	2.12069	0.00508233	0.555556	2.7697e-05	0.0004654	Mouse Phenotype	PHALANGEAL
MP:0003416	premature bone ossification	0.00566311	27.4604	64	2.33063	0.0131986	1.6722e-09	5.365e-08	26	6.81121	14	2.05544	0.00284611	0.538462	0.00246216	0.0196336	Mouse Phenotype	PHALANGEAL
MP:0004549	small trachea	0.00219154	10.6268	35	3.29356	0.00721798	2.622e-09	8.1392e-08	10	2.61969	7	2.67207	0.00142305	0.7	0.00466222	0.0325698	Mouse Phenotype	PHALANGEAL
MP:0030131	abnormal periodontium morphology	0.00408968	19.8309	51	2.57175	0.0105176	3.3403e-09	1.0124e-07	29	7.59711	15	1.97443	0.0030494	0.517241	0.00292108	0.0226692	Mouse Phenotype	PHALANGEAL
MP:0004462	small basisphenoid bone	0.00265728	12.8851	39	3.02674	0.0080429	3.346e-09	1.0124e-07	17	4.45348	11	2.46998	0.00223623	0.647059	0.00095541	0.00934018	Mouse Phenotype	PHALANGEAL
MP:0004653	absent caudal vertebrae	0.00215625	10.4557	34	3.25183	0.00701176	5.9527e-09	1.7091e-07	10	2.61969	7	2.67207	0.00142305	0.7	0.00466222	0.0325698	Mouse Phenotype	PHALANGEAL
MP:0005222	abnormal somite size	0.00737463	35.7596	75	2.09734	0.0154671	6.0571e-09	1.7236e-07	51	13.3604	23	1.7215	0.00467575	0.45098	0.00271213	0.0213597	Mouse Phenotype	PHALANGEAL
MP:0009743	preaxial polydactyly	0.00493808	23.9447	57	2.38048	0.011755	6.1268e-09	1.7327e-07	45	11.7886	21	1.78138	0.00426916	0.466667	0.0024523	0.0196336	Mouse Phenotype	PHALANGEAL
MP:0004135	abnormal mammary gland embryonic development	0.00307536	14.9124	42	2.81644	0.00866158	6.5298e-09	1.8278e-07	12	3.14363	10	3.18103	0.00203293	0.833333	5.8023e-05	0.00086277	Mouse Phenotype	PHALANGEAL
MP:0011256	abnormal neural fold morphology	0.00770249	37.3494	77	2.06162	0.0158796	7.7816e-09	2.1565e-07	60	15.7182	27	1.71776	0.00548892	0.45	0.00125751	0.0116052	Mouse Phenotype	PHALANGEAL
MP:0001727	abnormal embryo implantation	0.00813924	39.4672	80	2.027	0.0164982	8.2269e-09	2.2668e-07	65	17.028	32	1.87926	0.00650539	0.492308	5.7314e-05	0.00085756	Mouse Phenotype	PHALANGEAL
MP:0004181	abnormal carotid artery morphology	0.00716085	34.723	73	2.10235	0.0150546	8.7023e-09	2.3909e-07	50	13.0985	22	1.67959	0.00447245	0.44	0.00480237	0.0329379	Mouse Phenotype	PHALANGEAL
MP:0004989	decreased osteoblast cell number	0.00704756	34.1736	72	2.10689	0.0148484	1.0067e-08	2.7236e-07	49	12.8365	32	2.49289	0.00650539	0.653061	1.0439e-08	3.8534e-07	Mouse Phenotype	PHALANGEAL
MP:0013721	abnormal mammary placode morphology	0.00147065	7.13119	27	3.78618	0.00556816	1.0239e-08	2.7575e-07	4	1.04788	4	3.81724	0.00081317	1	0.00470556	0.0325698	Mouse Phenotype	PHALANGEAL
MP:0000554	abnormal carpal bone morphology	0.00720972	34.9599	73	2.08811	0.0150546	1.1367e-08	3.0273e-07	41	10.7408	25	2.32759	0.00508233	0.609756	2.8238e-06	6.2353e-05	Mouse Phenotype	PHALANGEAL
MP:0003073	abnormal metacarpal bone morphology	0.00749194	36.3284	75	2.0645	0.0154671	1.1407e-08	3.0294e-07	44	11.5267	25	2.16889	0.00508233	0.568182	1.6375e-05	0.00029373	Mouse Phenotype	PHALANGEAL
MP:0011732	decreased somite size	0.00626861	30.3965	66	2.1713	0.013611	1.3521e-08	3.5411e-07	38	9.95484	19	1.90862	0.00386257	0.5	0.00142266	0.0128321	Mouse Phenotype	PHALANGEAL
MP:0009053	abnormal anal canal morphology	0.00795118	38.5553	78	2.02307	0.0160858	1.3556e-08	3.5411e-07	38	9.95484	20	2.00907	0.00406587	0.526316	0.00045817	0.00505251	Mouse Phenotype	PHALANGEAL
MP:0005170	cleft upper lip	0.00643478	31.2022	67	2.14728	0.0138173	1.5938e-08	4.1278e-07	34	8.90696	17	1.90862	0.00345599	0.5	0.00250681	0.0199232	Mouse Phenotype	PHALANGEAL
MP:0004784	abnormal anterior cardinal vein morphology	0.00282147	13.6813	39	2.8506	0.0080429	1.6164e-08	4.1656e-07	15	3.92954	9	2.29034	0.00182964	0.6	0.00586473	0.0376579	Mouse Phenotype	PHALANGEAL
MP:0002260	abnormal thyroid cartilage morphology	0.00430436	20.8718	51	2.44348	0.0105176	1.6651e-08	4.2795e-07	26	6.81121	17	2.49589	0.00345599	0.653846	3.1173e-05	0.00051565	Mouse Phenotype	PHALANGEAL
MP:0013509	abnormal CD4-negative NK T cell number	0.00140977	6.83597	26	3.80341	0.00536193	1.7361e-08	4.4262e-07	7	1.83379	6	3.27192	0.00121976	0.857143	0.00175103	0.0151097	Mouse Phenotype	PHALANGEAL
MP:0000039	abnormal otic capsule morphology	0.00431291	20.9133	51	2.43864	0.0105176	1.7703e-08	4.5015e-07	21	5.50136	15	2.7266	0.0030494	0.714286	1.8692e-05	0.00032974	Mouse Phenotype	PHALANGEAL
MP:0001699	increased embryo size	0.00182398	8.84446	30	3.39195	0.00618684	1.8185e-08	4.5996e-07	9	2.35772	7	2.96896	0.00142305	0.777778	0.00180891	0.0152648	Mouse Phenotype	PHALANGEAL
MP:0000124	absent teeth	0.00271963	13.1875	38	2.88152	0.00783667	1.8614e-08	4.6957e-07	18	4.71545	11	2.33276	0.00223623	0.611111	0.00187623	0.0155582	Mouse Phenotype	PHALANGEAL
MP:0009907	decreased tongue size	0.00471175	22.8473	54	2.36352	0.0111363	1.8945e-08	4.7668e-07	24	6.28727	14	2.22672	0.00284611	0.583333	0.00086506	0.0085531	Mouse Phenotype	PHALANGEAL
MP:0004596	abnormal mandibular angle morphology	0.00346793	16.816	44	2.61656	0.00907404	2.3519e-08	5.8559e-07	13	3.4056	13	3.81724	0.00264281	1	2.705e-08	9.2959e-07	Mouse Phenotype	PHALANGEAL
MP:0008430	short squamosal bone	0.00047505	2.30353	15	6.51175	0.00309342	2.3937e-08	5.9444e-07	4	1.04788	4	3.81724	0.00081317	1	0.00470556	0.0325698	Mouse Phenotype	PHALANGEAL
MP:0004790	absent upper incisors	0.00133911	6.49334	25	3.8501	0.0051557	2.5665e-08	6.3406e-07	8	2.09576	8	3.81724	0.00162635	1	2.2089e-05	0.00038469	Mouse Phenotype	PHALANGEAL
MP:0004610	small vertebrae	0.00477348	23.1466	54	2.33295	0.0111363	2.8673e-08	7.0294e-07	24	6.28727	15	2.38578	0.0030494	0.625	0.00019561	0.00242883	Mouse Phenotype	PHALANGEAL
MP:0000492	abnormal rectum morphology	0.0078366	37.9997	76	2.00002	0.0156733	3.2369e-08	7.8548e-07	53	13.8844	24	1.72856	0.00487904	0.45283	0.00206833	0.01696	Mouse Phenotype	PHALANGEAL
MP:0002267	abnormal bronchiole morphology	0.00750185	36.3765	73	2.00679	0.0150546	5.245e-08	1.2382e-06	51	13.3604	26	1.94604	0.00528563	0.509804	0.00013417	0.00175008	Mouse Phenotype	PHALANGEAL
MP:0004453	abnormal pterygoid bone morphology	0.00271683	13.1739	37	2.80858	0.00763044	5.325e-08	1.254e-06	15	3.92954	13	3.30827	0.00264281	0.866667	1.6294e-06	3.8656e-05	Mouse Phenotype	PHALANGEAL
MP:0004791	absent lower incisors	0.00284287	13.7851	38	2.7566	0.00783667	5.6597e-08	1.323e-06	11	2.88166	8	2.77617	0.00162635	0.727273	0.00165294	0.0145552	Mouse Phenotype	PHALANGEAL
MP:0005503	abnormal tendon morphology	0.00572269	27.7493	60	2.16222	0.0123737	6.8544e-08	1.5769e-06	38	9.95484	23	2.31043	0.00467575	0.605263	8.4365e-06	0.00016461	Mouse Phenotype	PHALANGEAL
MP:0012768	decreased KLRG1-positive NK cell number	0.00114161	5.53567	22	3.97422	0.00453702	1.0025e-07	2.25e-06	9	2.35772	7	2.96896	0.00142305	0.777778	0.00180891	0.0152648	Mouse Phenotype	PHALANGEAL
MP:0004459	small alisphenoid bone	0.00328724	15.9398	41	2.57217	0.00845535	1.0735e-07	2.3869e-06	16	4.19151	13	3.10151	0.00264281	0.8125	6.5871e-06	0.00013287	Mouse Phenotype	PHALANGEAL
MP:0003931	absent molars	0.00086856	4.21167	19	4.51127	0.00391833	1.1026e-07	2.446e-06	8	2.09576	6	2.86293	0.00121976	0.75	0.00544219	0.0362341	Mouse Phenotype	PHALANGEAL
MP:0000018	small ears	0.00512719	24.8618	55	2.21223	0.0113425	1.1562e-07	2.5471e-06	32	8.38302	17	2.02791	0.00345599	0.53125	0.00105786	0.0102061	Mouse Phenotype	PHALANGEAL
MP:0013511	increased CD4-negative NK T cell number	0.00127358	6.17559	23	3.72434	0.00474325	1.6074e-07	3.4536e-06	5	1.30985	5	3.81724	0.00101647	1	0.00123197	0.0114247	Mouse Phenotype	PHALANGEAL
MP:0002256	abnormal laryngeal cartilage morphology	0.00672938	32.6308	66	2.02263	0.013611	1.6851e-07	3.5963e-06	35	9.16893	20	2.18128	0.00406587	0.571429	0.00010307	0.00140172	Mouse Phenotype	PHALANGEAL
MP:0004537	abnormal palatine bone horizontal plate morphology	0.00507582	24.6126	54	2.194	0.0111363	1.925e-07	4.0186e-06	29	7.59711	15	1.97443	0.0030494	0.517241	0.00292108	0.0226692	Mouse Phenotype	PHALANGEAL
MP:0006343	enlarged first pharyngeal arch	0.00150672	7.30608	25	3.42181	0.0051557	2.2694e-07	4.6661e-06	4	1.04788	4	3.81724	0.00081317	1	0.00470556	0.0325698	Mouse Phenotype	PHALANGEAL
MP:0004912	absent mandibular coronoid process	0.00230761	11.1896	32	2.8598	0.0065993	2.7546e-07	5.5563e-06	12	3.14363	9	2.86293	0.00182964	0.75	0.00056989	0.00600599	Mouse Phenotype	PHALANGEAL
MP:0010150	abnormal mandibule ramus morphology	0.00628936	30.4971	62	2.03298	0.0127861	3.3015e-07	6.5354e-06	31	8.12105	20	2.46273	0.00406587	0.645161	8.3193e-06	0.00016266	Mouse Phenotype	PHALANGEAL
MP:0002750	exophthalmos	0.00245656	11.9119	33	2.77034	0.00680553	3.6296e-07	7.0533e-06	20	5.23939	13	2.48121	0.00264281	0.65	0.00030276	0.00357364	Mouse Phenotype	PHALANGEAL
MP:0010802	abnormal intestinal enteroendocrine cell morphology	0.00145133	7.03748	24	3.41031	0.00494947	4.1469e-07	7.9138e-06	12	3.14363	8	2.54483	0.00162635	0.666667	0.00381906	0.0281044	Mouse Phenotype	PHALANGEAL
MP:0011481	anterior iris synechia	0.0039968	19.3805	45	2.32192	0.00928026	4.3713e-07	8.3255e-06	22	5.76333	15	2.60266	0.0030494	0.681818	4.4467e-05	0.00069469	Mouse Phenotype	PHALANGEAL
MP:0003072	abnormal metatarsal bone morphology	0.00621018	30.1132	61	2.02569	0.0125799	4.5804e-07	8.6719e-06	40	10.4788	22	2.09948	0.00447245	0.55	0.00010224	0.0013925	Mouse Phenotype	PHALANGEAL
MP:0003126	abnormal external female genitalia morphology	0.00607469	29.4562	60	2.03692	0.0123737	4.7494e-07	8.9741e-06	27	7.07317	14	1.97931	0.00284611	0.518518	0.00389161	0.0284898	Mouse Phenotype	PHALANGEAL
MP:0004222	iris synechia	0.00457272	22.1731	49	2.20988	0.0101052	5.6126e-07	1.0475e-05	26	6.81121	18	2.6427	0.00365928	0.692308	5.3452e-06	0.00010967	Mouse Phenotype	PHALANGEAL
MP:0011025	abnormal branching involved in trachea morphogenesis	0.00147752	7.16447	24	3.34986	0.00494947	5.6509e-07	1.0511e-05	4	1.04788	4	3.81724	0.00081317	1	0.00470556	0.0325698	Mouse Phenotype	PHALANGEAL
MP:0004594	abnormal mandibular coronoid process morphology	0.00477828	23.1699	50	2.15797	0.0103114	8.4364e-07	1.4909e-05	23	6.0253	16	2.65547	0.00325269	0.695652	1.6549e-05	0.00029582	Mouse Phenotype	PHALANGEAL
MP:0003138	absent tympanic ring	0.00426264	20.6695	46	2.2255	0.00948649	1.0137e-06	1.7648e-05	19	4.97742	16	3.21452	0.00325269	0.842105	2.0097e-07	5.7768e-06	Mouse Phenotype	PHALANGEAL
MP:0000118	arrest of tooth development	0.0027011	13.0976	34	2.59588	0.00701176	1.0152e-06	1.7648e-05	9	2.35772	9	3.81724	0.00182964	1	5.7797e-06	0.00011757	Mouse Phenotype	PHALANGEAL
MP:0013785	abnormal mammary gland bud morphology	0.0017669	8.56769	26	3.03466	0.00536193	1.1951e-06	2.0552e-05	6	1.57182	6	3.81724	0.00121976	1	0.0003225	0.00375566	Mouse Phenotype	PHALANGEAL
MP:0009274	buphthalmos	0.00248174	12.0339	32	2.65915	0.0065993	1.2654e-06	2.1528e-05	12	3.14363	9	2.86293	0.00182964	0.75	0.00056989	0.00600599	Mouse Phenotype	PHALANGEAL
MP:0012132	abnormal midbrain-hindbrain boundary morphology	0.00376346	18.249	42	2.30149	0.00866158	1.2849e-06	2.182e-05	22	5.76333	12	2.08213	0.00243952	0.545454	0.00434852	0.0313783	Mouse Phenotype	PHALANGEAL
MP:0000133	abnormal long bone metaphysis morphology	0.00585445	28.3882	57	2.00787	0.011755	1.3845e-06	2.3264e-05	48	12.5745	23	1.82909	0.00467575	0.479167	0.00099214	0.00964988	Mouse Phenotype	PHALANGEAL
MP:0030123	small middle ear ossicles	0.00231085	11.2053	30	2.67731	0.00618684	2.3334e-06	3.706e-05	14	3.66757	10	2.7266	0.00203293	0.714286	0.00051336	0.00553977	Mouse Phenotype	PHALANGEAL
MP:0009545	abnormal dermis papillary layer morphology	0.0016091	7.80254	24	3.07592	0.00494947	2.4005e-06	3.7999e-05	7	1.83379	6	3.27192	0.00121976	0.857143	0.00175103	0.0151097	Mouse Phenotype	PHALANGEAL
MP:0014077	ectopic Paneth cells	0.00210667	10.2152	28	2.74101	0.00577439	3.2303e-06	4.9895e-05	10	2.61969	7	2.67207	0.00142305	0.7	0.00466222	0.0325698	Mouse Phenotype	PHALANGEAL
MP:0010324	abnormal malleus processus brevis morphology	0.00152637	7.40139	23	3.10753	0.00474325	3.2642e-06	5.0175e-05	8	2.09576	6	2.86293	0.00121976	0.75	0.00544219	0.0362341	Mouse Phenotype	PHALANGEAL
MP:0008372	small malleus	0.00216713	10.5084	28	2.66454	0.00577439	5.4066e-06	8.0518e-05	12	3.14363	8	2.54483	0.00162635	0.666667	0.00381906	0.0281044	Mouse Phenotype	PHALANGEAL
MP:0004141	abnormal enteroendocrine cell morphology	0.00230906	11.1966	29	2.59007	0.00598062	6.2928e-06	9.2562e-05	20	5.23939	11	2.09948	0.00223623	0.55	0.00579054	0.0375599	Mouse Phenotype	PHALANGEAL
MP:0000956	decreased spinal cord size	0.00321037	15.5671	36	2.31257	0.00742421	6.3301e-06	9.2967e-05	17	4.45348	11	2.46998	0.00223623	0.647059	0.00095541	0.00934018	Mouse Phenotype	PHALANGEAL
MP:0011334	abnormal nephrogenic zone morphology	0.00431756	20.9358	44	2.10166	0.00907404	6.9809e-06	0.00010052	16	4.19151	14	3.34008	0.00284611	0.875	4.8529e-07	1.2853e-05	Mouse Phenotype	PHALANGEAL
MP:0010587	conotruncal ridge hypoplasia	0.00244959	11.878	30	2.52567	0.00618684	7.0922e-06	0.00010166	11	2.88166	9	3.1232	0.00182964	0.818182	0.00018599	0.00231844	Mouse Phenotype	PHALANGEAL
MP:0005258	ocular hypertension	0.00297405	14.4212	34	2.35765	0.00701176	7.6063e-06	0.00010838	15	3.92954	10	2.54483	0.00203293	0.666667	0.00117784	0.0111168	Mouse Phenotype	PHALANGEAL
MP:0002237	abnormal nasal cavity morphology	0.00338866	16.4316	37	2.25176	0.00763044	8.446e-06	0.00011881	26	6.81121	14	2.05544	0.00284611	0.538462	0.00246216	0.0196336	Mouse Phenotype	PHALANGEAL
MP:0001296	macrophthalmia	0.00342867	16.6256	37	2.22548	0.00763044	1.084e-05	0.00014934	18	4.71545	12	2.54483	0.00243952	0.666667	0.00036944	0.00422004	Mouse Phenotype	PHALANGEAL
MP:0003703	abnormal vestibulocochlear ganglion morphology	0.00412262	19.9906	42	2.10099	0.00866158	1.1181e-05	0.00015337	19	4.97742	15	3.01361	0.0030494	0.789474	2.3337e-06	5.2499e-05	Mouse Phenotype	PHALANGEAL
MP:0003843	abnormal sagittal suture morphology	0.00291527	14.1361	33	2.33445	0.00680553	1.2446e-05	0.00016927	16	4.19151	10	2.38578	0.00203293	0.625	0.0024044	0.0193668	Mouse Phenotype	PHALANGEAL
MP:0008274	failure of bone ossification	0.00358976	17.4068	38	2.18306	0.00783667	1.2609e-05	0.00017051	20	5.23939	11	2.09948	0.00223623	0.55	0.00579054	0.0375599	Mouse Phenotype	PHALANGEAL
MP:0013442	abnormal Harderian gland size	0.0022739	11.0261	28	2.53942	0.00577439	1.2745e-05	0.00017159	8	2.09576	6	2.86293	0.00121976	0.75	0.00544219	0.0362341	Mouse Phenotype	PHALANGEAL
MP:0000094	absent alveolar process	0.00099809	4.83972	17	3.5126	0.00350588	1.3059e-05	0.00017536	5	1.30985	5	3.81724	0.00101647	1	0.00123197	0.0114247	Mouse Phenotype	PHALANGEAL
MP:0008374	abnormal malleus manubrium morphology	0.00215244	10.4372	27	2.5869	0.00556816	1.3114e-05	0.00017561	9	2.35772	8	3.3931	0.00162635	0.888889	0.00015256	0.0019527	Mouse Phenotype	PHALANGEAL
MP:0000085	large anterior fontanelle	0.002286	11.0848	28	2.52598	0.00577439	1.399e-05	0.00018603	9	2.35772	8	3.3931	0.00162635	0.888889	0.00015256	0.0019527	Mouse Phenotype	PHALANGEAL
MP:0011028	impaired branching involved in bronchus morphogenesis	0.00320085	15.5209	35	2.25502	0.00721798	1.4105e-05	0.00018646	12	3.14363	9	2.86293	0.00182964	0.75	0.00056989	0.00600599	Mouse Phenotype	PHALANGEAL
MP:0000378	absent hair follicles	0.00293897	14.2511	33	2.31562	0.00680553	1.4579e-05	0.00019086	15	3.92954	10	2.54483	0.00203293	0.666667	0.00117784	0.0111168	Mouse Phenotype	PHALANGEAL
MP:0006322	abnormal perichondrium morphology	0.00193078	9.36236	25	2.67027	0.0051557	1.6092e-05	0.00020875	10	2.61969	7	2.67207	0.00142305	0.7	0.00466222	0.0325698	Mouse Phenotype	PHALANGEAL
MP:0003417	premature endochondral bone ossification	0.00269112	13.0492	31	2.37562	0.00639307	1.6167e-05	0.00020945	8	2.09576	6	2.86293	0.00121976	0.75	0.00544219	0.0362341	Mouse Phenotype	PHALANGEAL
MP:0003124	hypospadia	0.00283982	13.7703	32	2.32385	0.0065993	1.8182e-05	0.0002324	11	2.88166	9	3.1232	0.00182964	0.818182	0.00018599	0.00231844	Mouse Phenotype	PHALANGEAL
MP:0009247	meteorism	0.00407748	19.7717	41	2.07367	0.00845535	1.8868e-05	0.00024021	25	6.54924	15	2.29034	0.0030494	0.6	0.00037071	0.00422448	Mouse Phenotype	PHALANGEAL
MP:0005663	abnormal circulating noradrenaline level	0.00410118	19.8866	41	2.06169	0.00845535	2.1446e-05	0.00026923	25	6.54924	15	2.29034	0.0030494	0.6	0.00037071	0.00422448	Mouse Phenotype	PHALANGEAL
MP:0000301	decreased atrioventricular cushion size	0.00425138	20.615	42	2.03736	0.00866158	2.242e-05	0.00027947	23	6.0253	14	2.32354	0.00284611	0.608696	0.00047455	0.00519718	Mouse Phenotype	PHALANGEAL
MP:0000430	absent maxillary shelf	0.00201346	9.76326	25	2.56062	0.0051557	3.1494e-05	0.00037452	14	3.66757	10	2.7266	0.00203293	0.714286	0.00051336	0.00553977	Mouse Phenotype	PHALANGEAL
MP:0004377	small frontal bone	0.00319923	15.5131	34	2.1917	0.00701176	3.2262e-05	0.00038223	15	3.92954	10	2.54483	0.00203293	0.666667	0.00117784	0.0111168	Mouse Phenotype	PHALANGEAL
MP:0010906	abnormal lung bud morphology	0.00256411	12.4334	29	2.33243	0.00598062	4.0823e-05	0.00046968	9	2.35772	7	2.96896	0.00142305	0.777778	0.00180891	0.0152648	Mouse Phenotype	PHALANGEAL
MP:0009914	abnormal hyoid bone lesser horn morphology	0.00324289	15.7248	34	2.16219	0.00701176	4.1845e-05	0.00047914	14	3.66757	11	2.99926	0.00223623	0.785714	6.3395e-05	0.00092537	Mouse Phenotype	PHALANGEAL
MP:0013331	abnormal lacrimal gland development	0.00111416	5.40257	17	3.14665	0.00350588	5.0385e-05	0.0005701	8	2.09576	6	2.86293	0.00121976	0.75	0.00544219	0.0362341	Mouse Phenotype	PHALANGEAL
MP:0005203	abnormal trabecular meshwork morphology	0.00287012	13.9172	31	2.22746	0.00639307	5.236e-05	0.00058757	15	3.92954	10	2.54483	0.00203293	0.666667	0.00117784	0.0111168	Mouse Phenotype	PHALANGEAL
MP:0000553	absent radius	0.00273775	13.2753	30	2.25983	0.00618684	5.321e-05	0.00059571	13	3.4056	8	2.34907	0.00162635	0.615385	0.00765719	0.0471716	Mouse Phenotype	PHALANGEAL
MP:0004575	small limb buds	0.0040128	19.4581	39	2.00431	0.0080429	6.0083e-05	0.00066029	20	5.23939	13	2.48121	0.00264281	0.65	0.00030276	0.00357364	Mouse Phenotype	PHALANGEAL
MP:0004539	absent maxilla	0.00344932	16.7258	35	2.09258	0.00721798	6.1524e-05	0.00067457	13	3.4056	9	2.6427	0.00182964	0.692308	0.00142023	0.0128321	Mouse Phenotype	PHALANGEAL
MP:0006402	small molars	0.00304389	14.7598	32	2.16805	0.0065993	6.5651e-05	0.00071818	13	3.4056	9	2.6427	0.00182964	0.692308	0.00142023	0.0128321	Mouse Phenotype	PHALANGEAL
MP:0005208	abnormal iris stroma morphology	0.00322153	15.6212	33	2.11251	0.00680553	8.2329e-05	0.00088543	18	4.71545	12	2.54483	0.00243952	0.666667	0.00036944	0.00422004	Mouse Phenotype	PHALANGEAL
MP:0005218	abnormal pancreatic delta cell morphology	0.00364832	17.6907	36	2.03497	0.00742421	8.4017e-05	0.00090257	18	4.71545	11	2.33276	0.00223623	0.611111	0.00187623	0.0155582	Mouse Phenotype	PHALANGEAL
MP:0006226	iris hypoplasia	0.00267722	12.9818	29	2.23389	0.00598062	8.5108e-05	0.00091122	13	3.4056	9	2.6427	0.00182964	0.692308	0.00142023	0.0128321	Mouse Phenotype	PHALANGEAL
MP:0004418	small parietal bone	0.00365499	17.7231	36	2.03125	0.00742421	8.7021e-05	0.00092548	19	4.97742	12	2.41089	0.00243952	0.631579	0.00076367	0.00767761	Mouse Phenotype	PHALANGEAL
MP:0004372	bowed fibula	0.00228874	11.0981	26	2.34274	0.00536193	9.2152e-05	0.00097355	9	2.35772	7	2.96896	0.00142305	0.777778	0.00180891	0.0152648	Mouse Phenotype	PHALANGEAL
MP:0000441	increased cranium width	0.00205338	9.95684	24	2.4104	0.00494947	0.00011054	0.00114632	14	3.66757	9	2.45394	0.00182964	0.642857	0.0030526	0.0233304	Mouse Phenotype	PHALANGEAL
MP:0008173	increased follicular B cell number	0.00332329	16.1146	33	2.04783	0.00680553	0.00014408	0.00144697	32	8.38302	16	1.90862	0.00325269	0.5	0.00333423	0.025121	Mouse Phenotype	PHALANGEAL
MP:0004872	absent nasal septum	0.00209432	10.1554	24	2.36328	0.00494947	0.00014746	0.00147378	12	3.14363	8	2.54483	0.00162635	0.666667	0.00381906	0.0281044	Mouse Phenotype	PHALANGEAL
MP:0010743	delayed suture closure	0.0021011	10.1883	24	2.35565	0.00494947	0.00015454	0.0015359	15	3.92954	9	2.29034	0.00182964	0.6	0.00586473	0.0376579	Mouse Phenotype	PHALANGEAL
MP:0006210	abnormal orbit size	0.00089213	4.32592	14	3.23631	0.00288719	0.00016819	0.00164828	6	1.57182	5	3.18103	0.00101647	0.833333	0.00577935	0.0375599	Mouse Phenotype	PHALANGEAL
MP:0008066	small endolymphatic duct	0.00294191	14.2653	30	2.103	0.00618684	0.00018098	0.00175311	12	3.14363	11	3.49914	0.00223623	0.916667	3.6084e-06	7.7527e-05	Mouse Phenotype	PHALANGEAL
MP:0005204	abnormal canal of Schlemm morphology	0.00280537	13.6033	29	2.13184	0.00598062	0.00018398	0.00177319	14	3.66757	10	2.7266	0.00203293	0.714286	0.00051336	0.00553977	Mouse Phenotype	PHALANGEAL
MP:0003873	pharyngeal arch hypoplasia	0.0032555	15.7859	32	2.02712	0.0065993	0.00021396	0.00202345	20	5.23939	11	2.09948	0.00223623	0.55	0.00579054	0.0375599	Mouse Phenotype	PHALANGEAL
MP:0011759	absent Rathke's pouch	0.00190033	9.21468	22	2.3875	0.00453702	0.00023661	0.00221137	8	2.09576	6	2.86293	0.00121976	0.75	0.00544219	0.0362341	Mouse Phenotype	PHALANGEAL
MP:0002976	vascular smooth muscle hypotrophy	0.00041515	2.01308	9	4.47076	0.00185605	0.0002478	0.00230468	4	1.04788	4	3.81724	0.00081317	1	0.00470556	0.0325698	Mouse Phenotype	PHALANGEAL
MP:0013743	ciliary body hypoplasia	0.00140633	6.81927	18	2.63958	0.00371211	0.00026369	0.00242886	6	1.57182	5	3.18103	0.00101647	0.833333	0.00577935	0.0375599	Mouse Phenotype	PHALANGEAL
MP:0010809	abnormal Clara cell morphology	0.00302383	14.6625	30	2.04603	0.00618684	0.00028382	0.00258682	21	5.50136	12	2.18128	0.00243952	0.571429	0.00258947	0.020478	Mouse Phenotype	PHALANGEAL
MP:0004337	clavicle hypoplasia	0.00219736	10.655	24	2.25246	0.00494947	0.00029282	0.00265874	10	2.61969	8	3.05379	0.00162635	0.8	0.00058607	0.00614407	Mouse Phenotype	PHALANGEAL
MP:0000431	absent palatine bone horizontal plate	0.00180411	8.74812	21	2.40051	0.00433079	0.00030134	0.00272313	12	3.14363	8	2.54483	0.00162635	0.666667	0.00381906	0.0281044	Mouse Phenotype	PHALANGEAL
MP:0004366	abnormal strial marginal cell morphology	0.00130238	6.31526	17	2.69189	0.00350588	0.00030889	0.00277042	9	2.35772	7	2.96896	0.00142305	0.777778	0.00180891	0.0152648	Mouse Phenotype	PHALANGEAL
MP:0011964	increased total retina thickness	0.00207774	10.075	23	2.28288	0.00474325	0.00032198	0.0028663	10	2.61969	7	2.67207	0.00142305	0.7	0.00466222	0.0325698	Mouse Phenotype	PHALANGEAL
MP:0005313	absent adrenal gland	0.00222147	10.7719	24	2.22802	0.00494947	0.00034116	0.00300632	9	2.35772	7	2.96896	0.00142305	0.777778	0.00180891	0.0152648	Mouse Phenotype	PHALANGEAL
MP:0004224	absent trabecular meshwork	0.00119807	5.80946	16	2.75413	0.00329965	0.0003581	0.00313531	5	1.30985	5	3.81724	0.00101647	1	0.00123197	0.0114247	Mouse Phenotype	PHALANGEAL
MP:0009917	abnormal hyoid bone body morphology	0.00197815	9.59204	22	2.29357	0.00453702	0.00040284	0.00346816	9	2.35772	7	2.96896	0.00142305	0.777778	0.00180891	0.0152648	Mouse Phenotype	PHALANGEAL
MP:0010976	small lung lobe	0.00254799	12.3552	26	2.10438	0.00536193	0.00046201	0.00388507	11	2.88166	9	3.1232	0.00182964	0.818182	0.00018599	0.00231844	Mouse Phenotype	PHALANGEAL
MP:0003760	decreased palatal length	0.00164504	7.97678	19	2.38191	0.00391833	0.00062124	0.00498295	5	1.30985	5	3.81724	0.00101647	1	0.00123197	0.0114247	Mouse Phenotype	PHALANGEAL
MP:0011365	small metanephros	0.00102033	4.9476	14	2.82965	0.00288719	0.00062664	0.00501785	7	1.83379	6	3.27192	0.00121976	0.857143	0.00175103	0.0151097	Mouse Phenotype	PHALANGEAL
MP:0006288	small otic capsule	0.00220609	10.6973	23	2.15007	0.00474325	0.0007163	0.00563663	12	3.14363	10	3.18103	0.00203293	0.833333	5.8023e-05	0.00086277	Mouse Phenotype	PHALANGEAL
MP:0010098	abnormal retinal blood vessel pattern	0.00221409	10.7361	23	2.1423	0.00474325	0.00075092	0.00587524	12	3.14363	8	2.54483	0.00162635	0.666667	0.00381906	0.0281044	Mouse Phenotype	PHALANGEAL
MP:0008854	bleb	0.00250879	12.1651	25	2.05506	0.0051557	0.00081316	0.00627785	9	2.35772	7	2.96896	0.00142305	0.777778	0.00180891	0.0152648	Mouse Phenotype	PHALANGEAL
MP:0011387	absent metanephric mesenchyme	0.00143598	6.96305	17	2.44146	0.00350588	0.00089698	0.00678482	6	1.57182	6	3.81724	0.00121976	1	0.0003225	0.00375566	Mouse Phenotype	PHALANGEAL
MP:0004692	small pubis	0.00212455	10.3019	22	2.13552	0.00453702	0.0010029	0.00745048	7	1.83379	6	3.27192	0.00121976	0.857143	0.00175103	0.0151097	Mouse Phenotype	PHALANGEAL
MP:0005548	retinal pigment epithelium atrophy	0.00255009	12.3654	25	2.02177	0.0051557	0.00101494	0.00753404	13	3.4056	9	2.6427	0.00182964	0.692308	0.00142023	0.0128321	Mouse Phenotype	PHALANGEAL
MP:0010617	thick mitral valve cusps	0.00146639	7.11054	17	2.39082	0.00350588	0.00111927	0.00817523	7	1.83379	6	3.27192	0.00121976	0.857143	0.00175103	0.0151097	Mouse Phenotype	PHALANGEAL
MP:0006133	calcified artery	0.0017475	8.4736	19	2.24226	0.00391833	0.00123938	0.00891628	15	3.92954	9	2.29034	0.00182964	0.6	0.00586473	0.0376579	Mouse Phenotype	PHALANGEAL
MP:0010620	thick mitral valve	0.00189634	9.19534	20	2.17502	0.00412456	0.00133876	0.00950954	11	2.88166	8	2.77617	0.00162635	0.727273	0.00165294	0.0145552	Mouse Phenotype	PHALANGEAL
MP:0006433	abnormal articular cartilage morphology	0.00205701	9.97444	21	2.10538	0.00433079	0.00152247	0.0105481	17	4.45348	10	2.24544	0.00203293	0.588235	0.00447437	0.0320445	Mouse Phenotype	PHALANGEAL
MP:0001721	absent visceral yolk sac blood islands	0.00179007	8.68003	19	2.18893	0.00391833	0.0016197	0.011109	15	3.92954	9	2.29034	0.00182964	0.6	0.00586473	0.0376579	Mouse Phenotype	PHALANGEAL
MP:0008065	short endolymphatic duct	0.00141509	6.86176	16	2.33176	0.00329965	0.00196745	0.0130269	7	1.83379	6	3.27192	0.00121976	0.857143	0.00175103	0.0151097	Mouse Phenotype	PHALANGEAL
MP:0001062	absent oculomotor nerve	0.0013071	6.33814	15	2.36662	0.00309342	0.00232761	0.0149157	6	1.57182	5	3.18103	0.00101647	0.833333	0.00577935	0.0375599	Mouse Phenotype	PHALANGEAL
MP:0008380	abnormal gonial bone morphology	0.00213399	10.3477	21	2.02943	0.00433079	0.00233413	0.0149475	15	3.92954	9	2.29034	0.00182964	0.6	0.00586473	0.0376579	Mouse Phenotype	PHALANGEAL
MP:0004679	xiphoid process foramen	0.00068705	3.3315	10	3.00165	0.00206228	0.00233756	0.0149594	5	1.30985	5	3.81724	0.00101647	1	0.00123197	0.0114247	Mouse Phenotype	PHALANGEAL
MP:0011485	abnormal urethra urothelium morphology	0.00096025	4.65624	12	2.57719	0.00247474	0.00313385	0.0191455	4	1.04788	4	3.81724	0.00081317	1	0.00470556	0.0325698	Mouse Phenotype	PHALANGEAL
MP:0004913	absent mandibular angle	0.00205049	9.94283	20	2.0115	0.00412456	0.00321356	0.01957	7	1.83379	7	3.81724	0.00142305	1	8.4408e-05	0.00117643	Mouse Phenotype	PHALANGEAL
MP:0009189	abnormal pancreatic epsilon cell morphology	0.00149743	7.26105	16	2.20354	0.00329965	0.00338434	0.0203892	6	1.57182	5	3.18103	0.00101647	0.833333	0.00577935	0.0375599	Mouse Phenotype	PHALANGEAL
MP:0013166	small forelimb buds	0.0014987	7.26721	16	2.20167	0.00329965	0.00341148	0.0204753	7	1.83379	6	3.27192	0.00121976	0.857143	0.00175103	0.0151097	Mouse Phenotype	PHALANGEAL
MP:0011457	abnormal metanephric ureteric bud development	0.00124132	6.01916	14	2.32591	0.00288719	0.00370622	0.0218466	5	1.30985	5	3.81724	0.00101647	1	0.00123197	0.0114247	Mouse Phenotype	PHALANGEAL
MP:0006258	abnormal circumvallate papillae morphology	0.00062769	3.04366	9	2.95697	0.00185605	0.00415625	0.0239385	4	1.04788	4	3.81724	0.00081317	1	0.00470556	0.0325698	Mouse Phenotype	PHALANGEAL
MP:0003529	enlarged clitoris	0.00114545	5.55429	13	2.34053	0.00268097	0.00479167	0.026836	4	1.04788	4	3.81724	0.00081317	1	0.00470556	0.0325698	Mouse Phenotype	PHALANGEAL
MP:0006095	absent amacrine cells	0.00090087	4.3683	11	2.51814	0.00226851	0.00537996	0.0294841	6	1.57182	5	3.18103	0.00101647	0.833333	0.00577935	0.0375599	Mouse Phenotype	PHALANGEAL
MP:0010642	absent third pharyngeal arch	0.00117607	5.70278	13	2.27959	0.00268097	0.00591413	0.031749	9	2.35772	7	2.96896	0.00142305	0.777778	0.00180891	0.0152648	Mouse Phenotype	PHALANGEAL
MP:0003874	absent pharyngeal arches	0.00147099	7.13283	15	2.10295	0.00309342	0.00668329	0.0348685	12	3.14363	8	2.54483	0.00162635	0.666667	0.00381906	0.0281044	Mouse Phenotype	PHALANGEAL
MP:0010939	abnormal mandibular prominence morphology	0.0016135	7.82386	16	2.04503	0.00329965	0.00671477	0.0350054	7	1.83379	6	3.27192	0.00121976	0.857143	0.00175103	0.0151097	Mouse Phenotype	PHALANGEAL
MP:0005665	increased circulating noradrenaline level	0.00161701	7.84089	16	2.04059	0.00329965	0.00684639	0.0355945	11	2.88166	8	2.77617	0.00162635	0.727273	0.00165294	0.0145552	Mouse Phenotype	PHALANGEAL
MP:0012575	increased noradrenaline level	0.00162514	7.8803	16	2.03038	0.00329965	0.00715897	0.0369185	12	3.14363	8	2.54483	0.00162635	0.666667	0.00381906	0.0281044	Mouse Phenotype	PHALANGEAL
MP:0010452	retina microaneurysm	0.00121766	5.90441	13	2.20174	0.00268097	0.0077632	0.039397	6	1.57182	5	3.18103	0.00101647	0.833333	0.00577935	0.0375599	Mouse Phenotype	PHALANGEAL
MP:0004682	small intervertebral disk	0.00098389	4.77089	11	2.30565	0.00226851	0.00995819	0.0482322	4	1.04788	4	3.81724	0.00081317	1	0.00470556	0.0325698	Mouse Phenotype	PHALANGEAL
GO:0061036	positive regulation of cartilage development	0.00655467	34.2743	75	2.18823	0.0143431	1.0731e-09	1.5022e-07	29	8.45737	20	2.3648	0.0036523	0.689655	1.0571e-05	0.00045312	GO Biological Process	SHARED
GO:0035331	negative regulation of hippo signaling	0.00083226	4.35188	18	4.13614	0.00344234	8.011e-07	6.672e-05	8	2.33307	7	3.00034	0.00127831	0.875	0.00106649	0.0223827	GO Biological Process	SHARED
GO:0032332	positive regulation of chondrocyte differentiation	0.00426301	22.2913	47	2.10845	0.00898833	3.2249e-06	0.00023576	18	5.2494	13	2.47647	0.002374	0.722222	0.00019501	0.00540251	GO Biological Process	SHARED
GO:0008631	intrinsic apoptotic signaling pathway in response to oxidative stress	0.00164684	8.61135	24	2.78702	0.00458979	1.199e-05	0.00066292	17	4.95777	11	2.21874	0.00200877	0.647059	0.00251073	0.043301	GO Biological Process	SHARED
GO:0003272	endocardial cushion formation	0.00224088	11.7176	29	2.47491	0.00554599	1.4409e-05	0.00077707	17	4.95777	11	2.21874	0.00200877	0.647059	0.00251073	0.043301	GO Biological Process	SHARED
GO:0023019	signal transduction involved in regulation of gene expression	0.00309341	16.1755	35	2.16377	0.00669344	3.224e-05	0.00150978	20	5.83267	13	2.22883	0.002374	0.65	0.0009472	0.0203	GO Biological Process	SHARED
GO:0003149	membranous septum morphogenesis	0.00247911	12.9633	30	2.31423	0.00573724	3.5074e-05	0.00160815	9	2.6247	8	3.04797	0.00146092	0.888889	0.0003477	0.00883284	GO Biological Process	SHARED
GO:0007212	dopamine receptor signaling pathway	0.00358359	18.7386	38	2.0279	0.00726716	5.8652e-05	0.0024241	37	10.7904	21	1.94617	0.00383492	0.567568	0.00041425	0.0101134	GO Biological Process	SHARED
GO:0061029	eyelid development in camera-type eye	0.00248131	12.9748	29	2.23511	0.00554599	8.4492e-05	0.00327975	13	3.79123	10	2.63766	0.00182615	0.769231	0.00050451	0.011771	GO Biological Process	SHARED
GO:0032808	lacrimal gland development	0.00202127	10.5692	25	2.36535	0.00478103	0.00010759	0.00407995	7	2.04143	7	3.42896	0.00127831	1	0.00017893	0.00506349	GO Biological Process	SHARED
GO:0030575	nuclear body organization	0.00145783	7.62297	20	2.62365	0.00382482	0.00013483	0.00482963	11	3.20797	9	2.80552	0.00164354	0.818182	0.00045534	0.0109541	GO Biological Process	SHARED
GO:1903392	negative regulation of adherens junction organization	0.001828	9.55862	23	2.4062	0.00439855	0.00015558	0.00543031	16	4.66613	11	2.35741	0.00200877	0.6875	0.00120283	0.0245395	GO Biological Process	SHARED
GO:0051895	negative regulation of focal adhesion assembly	0.00171549	8.9703	22	2.45254	0.00420731	0.00016465	0.0056422	15	4.3745	10	2.28598	0.00182615	0.666667	0.00288624	0.0480761	GO Biological Process	SHARED
GO:0090037	positive regulation of protein kinase C signaling	0.00127518	6.66791	17	2.54952	0.0032511	0.00056334	0.0158058	8	2.33307	7	3.00034	0.00127831	0.875	0.00106649	0.0223827	GO Biological Process	SHARED
GO:0060394	negative regulation of pathway-restricted SMAD protein phosphorylation	0.0020194	10.5594	23	2.17815	0.00439855	0.00060485	0.0166457	10	2.91633	8	2.74317	0.00146092	0.8	0.00129025	0.0259212	GO Biological Process	SHARED
GO:0071679	commissural neuron axon guidance	0.00165063	8.63115	20	2.31719	0.00382482	0.00063562	0.0171046	8	2.33307	8	3.42896	0.00146092	1	5.2134e-05	0.00183924	GO Biological Process	SHARED
GO:0002072	optic cup morphogenesis involved in camera-type eye development	0.00191193	9.9975	22	2.20055	0.00420731	0.00068815	0.0180745	8	2.33307	7	3.00034	0.00127831	0.875	0.00106649	0.0223827	GO Biological Process	SHARED
GO:0060536	cartilage morphogenesis	0.00233576	12.2137	25	2.04689	0.00478103	0.00085961	0.0211432	12	3.4996	11	3.14322	0.00200877	0.916667	1.1335e-05	0.00048101	GO Biological Process	SHARED
GO:0048755	branching morphogenesis of a nerve	0.00145928	7.63059	18	2.35893	0.00344234	0.00094649	0.0227279	5	1.45817	5	3.42896	0.00091308	1	0.0021068	0.0379253	GO Biological Process	SHARED
GO:0008091	spectrin	0.00051339	2.68451	11	4.09759	0.00210365	0.00011358	0.00417594	8	2.33307	7	3.00034	0.00127831	0.875	0.00106649	0.0259563	GO Cellular Component	SHARED
GO:0033612	receptor serine/threonine kinase binding	0.00350273	18.3158	38	2.07472	0.00726716	3.6834e-05	0.00388786	15	4.3745	11	2.51457	0.00200877	0.733333	0.00051077	0.0295408	GO Molecular Function	SHARED
HP:0009832	Abnormality of the distal phalanx of finger	0.0101096	52.8633	107	2.02409	0.0204628	3.1327e-11	1.0452e-07	72	20.9976	40	1.90498	0.0073046	0.555556	2.5144e-06	0.00057858	Human Phenotype	SHARED
HP:0009833	Abnormality of the middle phalanges of the hand	0.00658462	34.431	77	2.23636	0.0147256	2.5361e-10	3.0961e-07	39	11.3737	21	1.84637	0.00383492	0.538462	0.00105992	0.0382935	Human Phenotype	SHARED
HP:0009658	Aplasia/Hypoplasia of the phalanges of the thumb	0.00286436	14.9778	45	3.00446	0.00860585	2.7839e-10	3.0961e-07	16	4.66613	13	2.78603	0.002374	0.8125	2.382e-05	0.00283841	Human Phenotype	SHARED
HP:0010183	Abnormality of the middle phalanges of the toes	0.00212196	11.0958	37	3.33461	0.00707592	6.8248e-10	4.5542e-07	11	3.20797	9	2.80552	0.00164354	0.818182	0.00045534	0.0225075	Human Phenotype	SHARED
HP:0010161	Abnormality of the phalanges of the toes	0.00589993	30.8507	70	2.26899	0.0133869	8.9611e-10	5.4361e-07	35	10.2072	20	1.95941	0.0036523	0.571429	0.00050252	0.0234509	Human Phenotype	SHARED
HP:0009835	Aplasia/Hypoplasia of the distal phalanges of the hand	0.00684991	35.8182	76	2.12183	0.0145343	3.0288e-09	1.2763e-06	52	15.1649	30	1.97825	0.00547845	0.576923	1.6443e-05	0.00219454	Human Phenotype	SHARED
HP:0009660	Short phalanx of the thumb	0.00204603	10.6987	35	3.27143	0.00669344	3.1125e-09	1.2763e-06	13	3.79123	11	2.90143	0.00200877	0.846154	5.406e-05	0.00515344	Human Phenotype	SHARED
HP:0008368	Tarsal synostosis	0.00217569	11.3767	35	3.07647	0.00669344	1.3976e-08	3.656e-06	12	3.4996	10	2.85747	0.00182615	0.833333	0.00015801	0.0121196	Human Phenotype	SHARED
HP:0000563	Keratoconus	0.00210042	10.9831	34	3.09566	0.0065022	1.9242e-08	3.656e-06	15	4.3745	13	2.97177	0.002374	0.866667	6.1125e-06	0.00104736	Human Phenotype	SHARED
HP:0100689	Decreased corneal thickness	0.00213474	11.1625	34	3.0459	0.0065022	2.8124e-08	4.4683e-06	16	4.66613	13	2.78603	0.002374	0.8125	2.382e-05	0.00283841	Human Phenotype	SHARED
HP:0010760	Absent toe	0.00372097	19.457	46	2.36419	0.00879709	2.0216e-07	2.1243e-05	29	8.45737	17	2.01008	0.00310446	0.586207	0.00088892	0.0340907	Human Phenotype	SHARED
HP:0011486	Abnormality of corneal thickness	0.0024847	12.9925	35	2.69387	0.00669344	3.1163e-07	2.9573e-05	17	4.95777	14	2.82385	0.00255661	0.823529	8.3723e-06	0.00124152	Human Phenotype	SHARED
HP:0009140	Synostosis involving bones of the feet	0.00304695	15.9325	37	2.3223	0.00707592	4.3542e-06	0.00023432	15	4.3745	12	2.74317	0.00219138	0.8	6.6916e-05	0.00620177	Human Phenotype	SHARED
HP:0010173	Aplasia/Hypoplasia of the phalanges of the toes	0.00255535	13.3619	32	2.39487	0.00611972	1.0245e-05	0.00044976	11	3.20797	9	2.80552	0.00164354	0.818182	0.00045534	0.0225075	Human Phenotype	SHARED
HP:0000421	Epistaxis	0.0029546	15.4496	34	2.20071	0.0065022	2.9881e-05	0.00097743	40	11.6653	22	1.88593	0.00401753	0.55	0.00055038	0.0251412	Human Phenotype	SHARED
HP:0010009	Abnormality of the 1st metacarpal	0.00137958	7.21385	20	2.77245	0.00382482	6.5416e-05	0.00172538	9	2.6247	8	3.04797	0.00146092	0.888889	0.0003477	0.0198309	Human Phenotype	SHARED
HP:0010034	Short 1st metacarpal	0.00134101	7.01212	19	2.70959	0.00363358	0.00013096	0.00289361	8	2.33307	7	3.00034	0.00127831	0.875	0.00106649	0.0382935	Human Phenotype	SHARED
HP:0003554	Type 2 muscle fiber atrophy	0.00052339	2.73683	11	4.01926	0.00210365	0.00013401	0.00294171	8	2.33307	7	3.00034	0.00127831	0.875	0.00106649	0.0382935	Human Phenotype	SHARED
HP:0000586	Shallow orbits	0.00238741	12.4838	27	2.16281	0.00516351	0.00024101	0.00450501	14	4.08287	10	2.44926	0.00182615	0.714286	0.0013026	0.0450374	Human Phenotype	SHARED
HP:0003041	Humeroradial synostosis	0.00201074	10.5142	24	2.28264	0.00458979	0.00024298	0.00452912	9	2.6247	8	3.04797	0.00146092	0.888889	0.0003477	0.0198309	Human Phenotype	SHARED
HP:0003070	Elbow ankylosis	0.00091942	4.80765	14	2.91202	0.00267738	0.00047635	0.00777177	6	1.7498	6	3.42896	0.00109569	1	0.00061402	0.026425	Human Phenotype	SHARED
HP:0002647	Aortic dissection	0.00134941	7.05606	17	2.40928	0.0032511	0.001033	0.0147607	8	2.33307	8	3.42896	0.00146092	1	5.2134e-05	0.00504192	Human Phenotype	SHARED
HP:0031013	Ankylosis	0.00130225	6.80946	16	2.34967	0.00305986	0.00182664	0.0232182	8	2.33307	8	3.42896	0.00146092	1	5.2134e-05	0.00504192	Human Phenotype	SHARED
MP:0013743	ciliary body hypoplasia	0.00140633	7.35367	33	4.48755	0.00631096	3.4723e-12	1.4434e-09	6	1.7498	6	3.42896	0.00109569	1	0.00061402	0.00799811	Mouse Phenotype	SHARED
MP:0003073	abnormal metacarpal bone morphology	0.00749194	39.1754	85	2.16973	0.0162555	1.3051e-10	3.2838e-08	44	12.8319	30	2.33793	0.00547845	0.681818	9.5588e-08	4.4145e-06	Mouse Phenotype	SHARED
MP:0000084	abnormal fontanelle morphology	0.00505002	26.4065	63	2.38577	0.0120482	9.4369e-10	1.7351e-07	28	8.16573	19	2.3268	0.00346969	0.678571	2.5298e-05	0.00058425	Mouse Phenotype	SHARED
MP:0006226	iris hypoplasia	0.00267722	13.9992	42	3.00018	0.00803213	1.1109e-09	1.9312e-07	13	3.79123	10	2.63766	0.00182615	0.769231	0.00050451	0.00690076	Mouse Phenotype	SHARED
MP:0005208	abnormal iris stroma morphology	0.00322153	16.8454	46	2.73072	0.00879709	3.2876e-09	4.9113e-07	18	5.2494	14	2.66697	0.00255661	0.777778	2.7491e-05	0.00062284	Mouse Phenotype	SHARED
MP:0002543	brachyphalangia	0.00338327	17.6911	47	2.6567	0.00898833	5.1308e-09	6.6291e-07	21	6.1243	18	2.93911	0.00328707	0.857143	1.1553e-07	5.1374e-06	Mouse Phenotype	SHARED
MP:0011481	anterior iris synechia	0.0039968	20.8992	52	2.48813	0.00994454	6.8926e-09	8.3418e-07	22	6.41593	16	2.49379	0.00292184	0.727273	2.9693e-05	0.00066643	Mouse Phenotype	SHARED
MP:0011772	genital tubercle hypoplasia	0.00200394	10.4786	33	3.14928	0.00631096	2.0779e-08	1.967e-06	7	2.04143	7	3.42896	0.00127831	1	0.00017893	0.00300657	Mouse Phenotype	SHARED
MP:0005354	abnormal ilium morphology	0.00212785	11.1265	34	3.05576	0.0065022	2.6079e-08	2.3523e-06	10	2.91633	8	2.74317	0.00146092	0.8	0.00129025	0.0145301	Mouse Phenotype	SHARED
MP:0003842	abnormal metopic suture morphology	0.0015422	8.06419	28	3.47214	0.00535475	3.3173e-08	2.758e-06	7	2.04143	7	3.42896	0.00127831	1	0.00017893	0.00300657	Mouse Phenotype	SHARED
MP:0005203	abnormal trabecular meshwork morphology	0.00287012	15.0078	40	2.66527	0.00764965	6.2003e-08	4.8591e-06	15	4.3745	11	2.51457	0.00200877	0.733333	0.00051077	0.00693678	Mouse Phenotype	SHARED
MP:0004222	iris synechia	0.00457272	23.9107	54	2.2584	0.010327	7.9876e-08	6.0532e-06	26	7.58247	17	2.24201	0.00310446	0.653846	0.00013823	0.0024475	Mouse Phenotype	SHARED
MP:0010860	abnormal anterior commissure pars posterior morphology	0.00252853	13.2217	36	2.7228	0.00688468	1.6643e-07	1.1033e-05	9	2.6247	7	2.66697	0.00127831	0.777778	0.00358225	0.0310797	Mouse Phenotype	SHARED
MP:0004596	abnormal mandibular angle morphology	0.00346793	18.1338	44	2.42641	0.00841461	1.845e-07	1.1919e-05	13	3.79123	12	3.1652	0.00219138	0.923077	3.5672e-06	0.00010559	Mouse Phenotype	SHARED
MP:0008727	enlarged heart right atrium	0.0027035	14.1366	37	2.61732	0.00707592	2.8949e-07	1.7857e-05	13	3.79123	11	2.90143	0.00200877	0.846154	5.406e-05	0.00109567	Mouse Phenotype	SHARED
MP:0005211	increased stomach mucosa thickness	0.00124023	6.48516	23	3.54656	0.00439855	3.7059e-07	2.2007e-05	11	3.20797	9	2.80552	0.00164354	0.818182	0.00045534	0.0063835	Mouse Phenotype	SHARED
MP:0000904	abnormal superior colliculus morphology	0.00333704	17.4494	42	2.40697	0.00803213	4.2261e-07	2.4753e-05	18	5.2494	11	2.09548	0.00200877	0.611111	0.00476175	0.0385823	Mouse Phenotype	SHARED
MP:0010980	ectopic ureteric bud	0.0024077	12.5898	34	2.70059	0.0065022	4.3077e-07	2.4811e-05	12	3.4996	9	2.57172	0.00164354	0.75	0.00134735	0.0148239	Mouse Phenotype	SHARED
MP:0004221	abnormal iridocorneal angle	0.00487813	25.5077	53	2.0778	0.0101358	1.2171e-06	5.8671e-05	26	7.58247	19	2.50578	0.00346969	0.730769	4.5745e-06	0.0001294	Mouse Phenotype	SHARED
MP:0011771	abnormal genital tubercle morphology	0.00294946	15.4228	37	2.39905	0.00707592	2.1258e-06	9.4532e-05	10	2.91633	9	3.08607	0.00164354	0.9	0.00011207	0.0020526	Mouse Phenotype	SHARED
MP:0008274	failure of bone ossification	0.00358976	18.7709	42	2.23751	0.00803213	2.559e-06	0.00011021	20	5.83267	12	2.05738	0.00219138	0.6	0.00395759	0.0335151	Mouse Phenotype	SHARED
MP:0001699	increased embryo size	0.00182398	9.53757	27	2.83091	0.00516351	2.6953e-06	0.00011504	9	2.6247	7	2.66697	0.00127831	0.777778	0.00358225	0.0310797	Mouse Phenotype	SHARED
MP:0000081	premature suture closure	0.00311614	16.2943	38	2.3321	0.00726716	2.9704e-06	0.00012348	13	3.79123	9	2.3739	0.00164354	0.692308	0.00324372	0.0293728	Mouse Phenotype	SHARED
MP:0004619	caudal vertebral fusion	0.00340338	17.7963	40	2.24766	0.00764965	3.9274e-06	0.00015568	17	4.95777	12	2.42044	0.00219138	0.705882	0.00048943	0.00675241	Mouse Phenotype	SHARED
MP:0004453	abnormal pterygoid bone morphology	0.00271683	14.2063	34	2.3933	0.0065022	5.6167e-06	0.00020497	15	4.3745	12	2.74317	0.00219138	0.8	6.6916e-05	0.00130834	Mouse Phenotype	SHARED
MP:0009274	buphthalmos	0.00248174	12.977	32	2.4659	0.00611972	5.7931e-06	0.0002106	12	3.4996	10	2.85747	0.00182615	0.833333	0.00015801	0.00274679	Mouse Phenotype	SHARED
MP:0010595	abnormal aortic valve cusp morphology	0.00401002	20.9684	44	2.0984	0.00841461	7.2746e-06	0.00025109	38	11.0821	22	1.98519	0.00401753	0.578947	0.00020489	0.0033259	Mouse Phenotype	SHARED
MP:0030026	small Meckel's cartilage	0.00384177	20.0886	42	2.09074	0.00803213	1.2548e-05	0.00039771	21	6.1243	13	2.12269	0.002374	0.619048	0.00182414	0.0189855	Mouse Phenotype	SHARED
MP:0014077	ectopic Paneth cells	0.00210667	11.0158	28	2.54181	0.00535475	1.2562e-05	0.00039771	10	2.91633	8	2.74317	0.00146092	0.8	0.00129025	0.0145301	Mouse Phenotype	SHARED
MP:0004634	short metacarpal bones	0.00253887	13.2757	31	2.33509	0.00592848	2.2294e-05	0.00065184	16	4.66613	11	2.35741	0.00200877	0.6875	0.00120283	0.0138892	Mouse Phenotype	SHARED
MP:0010587	conotruncal ridge hypoplasia	0.00244959	12.8089	30	2.34212	0.00573724	2.8331e-05	0.00079436	11	3.20797	9	2.80552	0.00164354	0.818182	0.00045534	0.0063835	Mouse Phenotype	SHARED
MP:0005353	abnormal patella morphology	0.00271362	14.1895	32	2.25518	0.00611972	3.1989e-05	0.00088141	22	6.41593	13	2.02621	0.002374	0.590909	0.00327435	0.0294848	Mouse Phenotype	SHARED
MP:0005258	ocular hypertension	0.00297405	15.5513	34	2.18631	0.0065022	3.3915e-05	0.0009134	15	4.3745	11	2.51457	0.00200877	0.733333	0.00051077	0.00693678	Mouse Phenotype	SHARED
MP:0000478	delayed intestine development	0.00123632	6.46473	19	2.93902	0.00363358	4.6433e-05	0.00115914	9	2.6247	7	2.66697	0.00127831	0.777778	0.00358225	0.0310797	Mouse Phenotype	SHARED
MP:0004068	dilated dorsal aorta	0.00358277	18.7343	38	2.02837	0.00726716	5.8378e-05	0.00139191	22	6.41593	15	2.33793	0.00273923	0.681818	0.00017177	0.00291189	Mouse Phenotype	SHARED
MP:0005204	abnormal canal of Schlemm morphology	0.00280537	14.6693	32	2.18143	0.00611972	5.8871e-05	0.00140017	14	4.08287	10	2.44926	0.00182615	0.714286	0.0013026	0.0145833	Mouse Phenotype	SHARED
MP:0003124	hypospadia	0.00283982	14.8494	32	2.15497	0.00611972	7.3366e-05	0.00168619	11	3.20797	9	2.80552	0.00164354	0.818182	0.00045534	0.0063835	Mouse Phenotype	SHARED
MP:0006400	decreased molar number	0.00151658	7.93017	21	2.64811	0.00401606	8.2129e-05	0.00182614	9	2.6247	7	2.66697	0.00127831	0.777778	0.00358225	0.0310797	Mouse Phenotype	SHARED
MP:0009735	abnormal prostate gland development	0.00315012	16.472	34	2.06411	0.0065022	0.00010016	0.00216172	15	4.3745	10	2.28598	0.00182615	0.666667	0.00288624	0.0271608	Mouse Phenotype	SHARED
MP:0011365	small metanephros	0.00102033	5.33533	16	2.99888	0.00305986	0.00014172	0.00286395	7	2.04143	6	2.93911	0.00109569	0.857143	0.00322455	0.0293728	Mouse Phenotype	SHARED
MP:0004912	absent mandibular coronoid process	0.00230761	12.0665	27	2.2376	0.00516351	0.0001424	0.00286624	12	3.4996	9	2.57172	0.00164354	0.75	0.00134735	0.0148239	Mouse Phenotype	SHARED
MP:0008006	increased stomach pH	0.00146764	7.6743	20	2.6061	0.00382482	0.00014703	0.0029225	16	4.66613	10	2.1431	0.00182615	0.625	0.00569194	0.0447538	Mouse Phenotype	SHARED
MP:0004360	absent ulna	0.0023178	12.1198	27	2.22777	0.00516351	0.00015256	0.00300124	11	3.20797	9	2.80552	0.00164354	0.818182	0.00045534	0.0063835	Mouse Phenotype	SHARED
MP:0011486	ectopic ureter	0.00175997	9.20288	22	2.39056	0.00420731	0.00023285	0.00408491	7	2.04143	6	2.93911	0.00109569	0.857143	0.00322455	0.0293728	Mouse Phenotype	SHARED
MP:0008457	abnormal cortical intermediate zone morphology	0.00176334	9.22051	22	2.38598	0.00420731	0.00023891	0.00416834	11	3.20797	8	2.49379	0.00146092	0.727273	0.00351666	0.0310797	Mouse Phenotype	SHARED
MP:0008915	fused carpal bones	0.00214739	11.2287	25	2.22644	0.00478103	0.0002635	0.00449076	16	4.66613	12	2.57172	0.00219138	0.75	0.0001962	0.00323988	Mouse Phenotype	SHARED
MP:0009728	abnormal calcaneum morphology	0.00253383	13.2494	28	2.1133	0.00535475	0.00026948	0.00456823	8	2.33307	7	3.00034	0.00127831	0.875	0.00106649	0.01265	Mouse Phenotype	SHARED
MP:0000085	large anterior fontanelle	0.002286	11.9535	26	2.1751	0.00497227	0.00028529	0.00478535	9	2.6247	7	2.66697	0.00127831	0.777778	0.00358225	0.0310797	Mouse Phenotype	SHARED
MP:0004226	absent Schlemm's canal	0.00182318	9.5334	22	2.30768	0.00420731	0.00037213	0.00590045	9	2.6247	7	2.66697	0.00127831	0.777778	0.00358225	0.0310797	Mouse Phenotype	SHARED
MP:0013496	abnormal trachea development	0.00222783	11.6493	25	2.14605	0.00478103	0.000446	0.00673648	7	2.04143	6	2.93911	0.00109569	0.857143	0.00322455	0.0293728	Mouse Phenotype	SHARED
MP:0001307	fused cornea and lens	0.00262402	13.721	28	2.04067	0.00535475	0.00046092	0.00686423	16	4.66613	11	2.35741	0.00200877	0.6875	0.00120283	0.0138892	Mouse Phenotype	SHARED
MP:0011724	ectopic cortical neuron	0.00082581	4.31814	13	3.01056	0.00248614	0.00055132	0.00797456	9	2.6247	7	2.66697	0.00127831	0.777778	0.00358225	0.0310797	Mouse Phenotype	SHARED
MP:0008919	fused tarsal bones	0.00253033	13.2311	27	2.04065	0.00516351	0.00057501	0.00823156	15	4.3745	10	2.28598	0.00182615	0.666667	0.00288624	0.0271608	Mouse Phenotype	SHARED
MP:0006295	absent sclerotome	0.00180811	9.45462	21	2.22113	0.00401606	0.00080071	0.0107977	7	2.04143	6	2.93911	0.00109569	0.857143	0.00322455	0.0293728	Mouse Phenotype	SHARED
MP:0004635	short metatarsal bones	0.00184529	9.64903	21	2.17638	0.00401606	0.00102566	0.01289	11	3.20797	8	2.49379	0.00146092	0.727273	0.00351666	0.0310797	Mouse Phenotype	SHARED
MP:0010484	bicuspid aortic valve	0.00211864	11.0784	23	2.07612	0.00439855	0.00112588	0.013854	22	6.41593	15	2.33793	0.00273923	0.681818	0.00017177	0.00291189	Mouse Phenotype	SHARED
MP:0010734	abnormal paranode morphology	0.0016159	8.44952	19	2.24865	0.00363358	0.00120139	0.0145953	11	3.20797	8	2.49379	0.00146092	0.727273	0.00351666	0.0310797	Mouse Phenotype	SHARED
MP:0013742	absent ciliary body	0.00124862	6.52902	16	2.4506	0.00305986	0.00120311	0.0145976	5	1.45817	5	3.42896	0.00091308	1	0.0021068	0.0211366	Mouse Phenotype	SHARED
MP:0009252	absent urinary bladder	0.00200155	10.4661	21	2.00648	0.00401606	0.00265985	0.0262444	9	2.6247	7	2.66697	0.00127831	0.777778	0.00358225	0.0310797	Mouse Phenotype	SHARED
MP:0003800	monodactyly	0.00089549	4.68249	12	2.56274	0.00229489	0.00327637	0.0306211	8	2.33307	8	3.42896	0.00146092	1	5.2134e-05	0.00106508	Mouse Phenotype	SHARED
MP:0013511	increased CD4-negative NK T cell number	0.00127358	6.65955	15	2.25241	0.00286862	0.00365755	0.0331468	5	1.45817	5	3.42896	0.00091308	1	0.0021068	0.0211366	Mouse Phenotype	SHARED
GO:0035437	maintenance of protein localization in endoplasmic reticulum	0.00024257	0.768699	8	10.4072	0.00252446	1.5204e-06	0.0003923	10	2.25542	7	3.10364	0.00165289	0.7	0.00184222	0.0476229	GO Biological Process	HAND
GO:1903312	negative regulation of mRNA metabolic process	0.00326465	10.3457	27	2.60979	0.00852004	1.1105e-05	0.00175321	39	8.79613	18	2.04635	0.0042503	0.461539	0.00094898	0.0287073	GO Biological Process	HAND
GO:0061013	regulation of mRNA catabolic process	0.00330553	10.4752	25	2.38658	0.00788892	9.2778e-05	0.00797953	31	6.9918	15	2.14537	0.00354191	0.483871	0.00137518	0.0381773	GO Biological Process	HAND
GO:2000738	positive regulation of stem cell differentiation	0.00430464	13.6414	29	2.12588	0.00915115	0.00019006	0.0133744	17	3.83421	11	2.86891	0.0025974	0.647059	0.00023696	0.00936393	GO Biological Process	HAND
GO:0014897	striated muscle hypertrophy	0.0044324	14.0463	29	2.0646	0.00915115	0.00030354	0.017596	29	6.54071	17	2.5991	0.00401417	0.586207	2.9637e-05	0.0017567	GO Biological Process	HAND
GO:0043313	regulation of neutrophil degranulation	0.00065463	2.07454	9	4.33831	0.00284001	0.00030702	0.017642	8	1.80434	7	3.87954	0.00165289	0.875	0.00018997	0.00804042	GO Biological Process	HAND
GO:0030828	positive regulation of cGMP biosynthetic process	0.00188396	5.97028	16	2.67994	0.00504891	0.00047598	0.0229562	19	4.2853	11	2.56692	0.0025974	0.578947	0.00091759	0.0281687	GO Biological Process	HAND
GO:0003300	cardiac muscle hypertrophy	0.0043457	13.7715	28	2.03318	0.0088356	0.00048119	0.0230437	28	6.31517	16	2.53358	0.00377804	0.571429	7.8225e-05	0.00392889	GO Biological Process	HAND
GO:1902563	regulation of neutrophil activation	0.00071057	2.2518	9	3.99681	0.00284001	0.00054964	0.0255571	10	2.25542	7	3.10364	0.00165289	0.7	0.00184222	0.0476229	GO Biological Process	HAND
GO:0034199	activation of protein kinase A activity	0.00207023	6.56057	16	2.43881	0.00504891	0.00125611	0.0440808	17	3.83421	10	2.6081	0.00236128	0.588235	0.00133859	0.0374776	GO Biological Process	HAND
GO:0002102	podosome	0.00275815	8.74058	25	2.86022	0.00788892	5.1104e-06	0.00020387	29	6.54071	18	2.75199	0.0042503	0.62069	5.5692e-06	0.00037266	GO Cellular Component	HAND
GO:0005201	extracellular matrix structural constituent	0.00811312	25.7105	62	2.41147	0.0195645	7.8938e-10	8.3319e-07	78	17.5923	36	2.04635	0.00850059	0.461539	3.4456e-06	0.00161638	GO Molecular Function	HAND
HP:0001007	Hirsutism	0.00870861	27.5976	56	2.02916	0.0176712	1.1947e-06	0.00056944	73	16.4646	36	2.18651	0.00850059	0.493151	4.6903e-07	0.00076836	Human Phenotype	HAND
HP:0001600	Abnormality of the larynx	0.0070226	22.2546	45	2.02205	0.0142001	1.3659e-05	0.00260414	67	15.1113	29	1.91909	0.0068477	0.432836	0.00012653	0.0141287	Human Phenotype	HAND
HP:0001572	Macrodontia	0.00158932	5.03657	16	3.17677	0.00504891	7.3642e-05	0.00722669	7	1.57879	6	3.80037	0.00141677	0.857143	0.00074145	0.0368069	Human Phenotype	HAND
HP:0009617	Abnormality of the distal phalanx of the thumb	0.00224881	7.12647	19	2.66612	0.00599558	0.00015884	0.0119283	17	3.83421	11	2.86891	0.0025974	0.647059	0.00023696	0.0197087	Human Phenotype	HAND
HP:0003431	Decreased motor nerve conduction velocity	0.00365908	11.5956	24	2.06975	0.00757337	0.00092077	0.0384019	38	8.57059	18	2.1002	0.0042503	0.473684	0.00064607	0.0335045	Human Phenotype	HAND
MP:0004134	abnormal chest morphology	0.00646668	20.4929	48	2.34227	0.0151467	1.3884e-07	6.6371e-05	51	11.5026	21	1.82567	0.00495868	0.411765	0.0022309	0.0323923	Mouse Phenotype	HAND
MP:0008190	decreased transitional stage B cell number	0.00540753	17.1365	38	2.21749	0.0119912	8.7884e-06	0.00145159	64	14.4347	28	1.93977	0.00661157	0.4375	0.00013138	0.00385322	Mouse Phenotype	HAND
MP:0003122	maternal imprinting	0.00277104	8.78143	24	2.73304	0.00757337	1.6115e-05	0.00220104	22	4.96192	12	2.41842	0.00283353	0.545454	0.00109978	0.0194199	Mouse Phenotype	HAND
MP:0008481	increased spleen germinal center number	0.00316703	10.0363	26	2.59059	0.00820448	1.8051e-05	0.0024308	33	7.44288	15	2.01535	0.00354191	0.454545	0.00298837	0.0390858	Mouse Phenotype	HAND
MP:0000065	abnormal bone marrow cavity morphology	0.00555321	17.5981	36	2.04567	0.0113601	7.4548e-05	0.00614445	40	9.02168	17	1.88435	0.00401417	0.425	0.00385642	0.0476989	Mouse Phenotype	HAND
MP:0009919	abnormal transitional stage T1 B cell morphology	0.00246664	7.81679	20	2.55859	0.00631114	0.00018447	0.0108249	27	6.08963	14	2.29899	0.00330579	0.518518	0.00083385	0.0160411	Mouse Phenotype	HAND
MP:0006236	absent Meibomian glands	0.00137975	4.37242	14	3.20189	0.0044178	0.00018637	0.0108249	8	1.80434	6	3.32532	0.00141677	0.75	0.00239592	0.0340377	Mouse Phenotype	HAND
MP:0009920	abnormal transitional stage T2 B cell morphology	0.00271733	8.61122	21	2.43868	0.0066267	0.0002437	0.01309	29	6.54071	14	2.14044	0.00330579	0.482759	0.00203242	0.0302208	Mouse Phenotype	HAND
MP:0009926	decreased transitional stage T2 B cell number	0.00239792	7.59901	19	2.50033	0.00599558	0.00034777	0.0169645	26	5.86409	13	2.21688	0.00306966	0.5	0.00196203	0.0294028	Mouse Phenotype	HAND
MP:0008189	increased transitional stage B cell number	0.00373063	11.8224	25	2.11464	0.00788892	0.0005428	0.0233771	36	8.11951	16	1.97056	0.00377804	0.444444	0.00290752	0.0383363	Mouse Phenotype	HAND
MP:0003842	abnormal metopic suture morphology	0.0015422	4.88725	14	2.8646	0.0044178	0.00055501	0.0236896	7	1.57879	6	3.80037	0.00141677	0.857143	0.00074145	0.0145267	Mouse Phenotype	HAND
MP:0009867	abnormal ascending aorta morphology	0.00423373	13.4167	27	2.01242	0.00852004	0.00069608	0.0276149	31	6.9918	16	2.28839	0.00377804	0.516129	0.00038281	0.00871448	Mouse Phenotype	HAND
MP:0008274	failure of bone ossification	0.00358976	11.376	24	2.10971	0.00757337	0.0007136	0.027848	20	4.51084	12	2.66026	0.00283353	0.6	0.00033873	0.00801634	Mouse Phenotype	HAND
MP:0010816	decreased type I pneumocyte number	0.00245622	7.78376	18	2.31251	0.00568003	0.00116877	0.0382693	14	3.15759	9	2.85028	0.00212515	0.642857	0.00097447	0.0176779	Mouse Phenotype	HAND
MP:0005223	abnormal dorsal-ventral polarity of the somites	0.00189332	5.99994	15	2.50003	0.00473335	0.0013834	0.0426667	16	3.60867	9	2.49399	0.00212515	0.5625	0.00356738	0.0447608	Mouse Phenotype	HAND
MP:0000932	absent notochord	0.00292665	9.27455	20	2.15644	0.00631114	0.00146843	0.043874	23	5.18746	13	2.50604	0.00306966	0.565217	0.00043019	0.00956525	Mouse Phenotype	HAND
GO:0060021	palate development	0.0160527	65.0134	148	2.27645	0.0365432	3.5681e-19	2.1405e-16	92	20.5931	46	2.23376	0.0109446	0.5	5.5872e-09	3.6761e-07	GO Biological Process	FOOT
GO:0061036	positive regulation of cartilage development	0.00655467	26.5464	76	2.86291	0.0187654	2.9577e-15	4.9267e-13	29	6.49129	17	2.61889	0.00404473	0.586207	2.6683e-05	0.00076165	GO Biological Process	FOOT
GO:0001707	mesoderm formation	0.010219	41.3869	100	2.41623	0.0246914	6.0706e-15	8.9756e-13	67	14.9971	31	2.06706	0.00737568	0.462687	1.2913e-05	0.00038972	GO Biological Process	FOOT
GO:0060686	negative regulation of prostatic bud formation	0.00164417	6.6589	34	5.10595	0.00839506	4.8473e-14	5.1228e-12	4	0.895351	4	4.46752	0.0009517	1	0.00250756	0.0361017	GO Biological Process	FOOT
GO:0048332	mesoderm morphogenesis	0.0107504	43.539	101	2.31976	0.0249383	5.0613e-14	5.2858e-12	69	15.4448	32	2.0719	0.00761361	0.463768	8.8552e-06	0.00027678	GO Biological Process	FOOT
GO:0072201	negative regulation of mesenchymal cell proliferation	0.00229545	9.29658	40	4.30266	0.00987654	6.9992e-14	6.9808e-12	8	1.7907	6	3.35064	0.00142755	0.75	0.00229751	0.0338555	GO Biological Process	FOOT
GO:0060900	embryonic camera-type eye formation	0.0026429	10.7037	43	4.01729	0.0106173	8.0426e-14	7.898e-12	12	2.68605	9	3.35064	0.00214133	0.75	0.00015747	0.00354827	GO Biological Process	FOOT
GO:0061035	regulation of cartilage development	0.012862	52.091	113	2.16928	0.0279012	1.2121e-13	1.1e-11	62	13.8779	33	2.37787	0.00785154	0.532258	1.162e-07	5.8151e-06	GO Biological Process	FOOT
GO:0038030	non-canonical Wnt signaling pathway via MAPK cascade	0.00104506	4.23249	27	6.37922	0.00666667	1.2213e-13	1.1008e-11	6	1.34303	5	3.72294	0.00118963	0.833333	0.00273809	0.0387009	GO Biological Process	FOOT
GO:0048048	embryonic eye morphogenesis	0.0060632	24.556	69	2.80991	0.017037	1.2681e-13	1.1275e-11	34	7.61048	21	2.75935	0.00499643	0.617647	8.9789e-07	3.658e-05	GO Biological Process	FOOT
GO:0042733	embryonic digit morphogenesis	0.0114377	46.3228	103	2.22353	0.0254321	3.4878e-13	2.8157e-11	63	14.1018	28	1.98557	0.00666191	0.444444	8.1624e-05	0.00200018	GO Biological Process	FOOT
GO:0048340	paraxial mesoderm morphogenesis	0.00220903	8.94655	38	4.24744	0.00938272	4.2351e-13	3.3775e-11	10	2.23838	8	3.57402	0.0019034	0.8	0.00018129	0.00400945	GO Biological Process	FOOT
GO:0031076	embryonic camera-type eye development	0.00599251	24.2697	67	2.76065	0.0165432	6.1557e-13	4.8216e-11	37	8.28199	22	2.65637	0.00523436	0.594595	1.2458e-06	4.8502e-05	GO Biological Process	FOOT
GO:1905331	negative regulation of morphogenesis of an epithelium	0.00380842	15.4241	51	3.30651	0.0125926	6.2116e-13	4.8366e-11	18	4.02908	11	2.73015	0.00261718	0.611111	0.00045229	0.00894985	GO Biological Process	FOOT
GO:0048596	embryonic camera-type eye morphogenesis	0.00462425	18.7282	57	3.04354	0.0140741	7.5982e-13	5.8131e-11	25	5.59594	17	3.03792	0.00404473	0.68	1.4205e-06	5.4179e-05	GO Biological Process	FOOT
GO:0045836	positive regulation of meiotic nuclear division	0.00261382	10.586	41	3.87306	0.0101235	9.2975e-13	6.9122e-11	12	2.68605	8	2.97835	0.0019034	0.666667	0.00128554	0.0213861	GO Biological Process	FOOT
GO:0072132	mesenchyme morphogenesis	0.00877871	35.5538	84	2.36262	0.0207407	2.6265e-12	1.7908e-10	43	9.62502	23	2.3896	0.00547228	0.534884	8.5984e-06	0.00027069	GO Biological Process	FOOT
GO:0010595	positive regulation of endothelial cell migration	0.0123856	50.1617	106	2.11317	0.0261728	3.1434e-12	2.0997e-10	75	16.7878	33	1.96571	0.00785154	0.44	2.5229e-05	0.00072172	GO Biological Process	FOOT
GO:0048341	paraxial mesoderm formation	0.00161714	6.54941	31	4.73325	0.00765432	4.0767e-12	2.6557e-10	7	1.56686	6	3.82931	0.00142755	0.857143	0.00070973	0.0129487	GO Biological Process	FOOT
GO:0010464	regulation of mesenchymal cell proliferation	0.00905871	36.6878	85	2.31685	0.0209877	5.1774e-12	3.3072e-10	36	8.05816	25	3.10245	0.00594813	0.694444	2.2575e-09	1.5971e-07	GO Biological Process	FOOT
GO:0007223	Wnt signaling pathway, calcium modulating pathway	0.0057072	23.1142	62	2.68234	0.0153086	1.3794e-11	8.0674e-10	37	8.28199	18	2.17339	0.00428266	0.486486	0.00038967	0.00788867	GO Biological Process	FOOT
GO:0040037	negative regulation of fibroblast growth factor receptor signaling pathway	0.0042027	17.0209	51	2.99631	0.0125926	2.0249e-11	1.1375e-09	12	2.68605	9	3.35064	0.00214133	0.75	0.00015747	0.00354827	GO Biological Process	FOOT
GO:0030279	negative regulation of ossification	0.0093168	37.733	85	2.25267	0.0209877	2.049e-11	1.1425e-09	70	15.6686	35	2.23376	0.00832739	0.5	3.6395e-07	1.6345e-05	GO Biological Process	FOOT
GO:0002072	optic cup morphogenesis involved in camera-type eye development	0.00191193	7.74333	32	4.13259	0.00790124	5.5831e-11	2.9154e-09	8	1.7907	6	3.35064	0.00142755	0.75	0.00229751	0.0338555	GO Biological Process	FOOT
GO:0040036	regulation of fibroblast growth factor receptor signaling pathway	0.00699562	28.3323	69	2.43539	0.017037	6.3586e-11	3.2813e-09	26	5.81978	17	2.92107	0.00404473	0.653846	3.2447e-06	0.00011478	GO Biological Process	FOOT
GO:0060685	regulation of prostatic bud formation	0.00265114	10.7371	38	3.53913	0.00938272	7.7872e-11	3.9412e-09	6	1.34303	6	4.46752	0.00142755	1	0.00012543	0.00292175	GO Biological Process	FOOT
GO:1904948	midbrain dopaminergic neuron differentiation	0.0026548	10.7519	38	3.53424	0.00938272	8.0908e-11	4.0792e-09	12	2.68605	9	3.35064	0.00214133	0.75	0.00015747	0.00354827	GO Biological Process	FOOT
GO:0001837	epithelial to mesenchymal transition	0.0112123	45.4097	94	2.07004	0.0232099	1.4622e-10	6.9712e-09	66	14.7733	32	2.16607	0.00761361	0.484849	2.7003e-06	9.735e-05	GO Biological Process	FOOT
GO:0009880	embryonic pattern specification	0.0105707	42.8113	90	2.10225	0.0222222	1.6885e-10	7.8789e-09	65	14.5495	31	2.13067	0.00737568	0.476923	5.945e-06	0.00019656	GO Biological Process	FOOT
GO:0060602	branch elongation of an epithelium	0.00493453	19.9849	54	2.70205	0.0133333	2.1245e-10	9.7072e-09	16	3.5814	11	3.07142	0.00261718	0.6875	9.764e-05	0.0023489	GO Biological Process	FOOT
GO:2001237	negative regulation of extrinsic apoptotic signaling pathway	0.0113377	45.9176	94	2.04714	0.0232099	2.5434e-10	1.1462e-08	101	22.6076	40	1.76932	0.00951701	0.39604	7.183e-05	0.00179357	GO Biological Process	FOOT
GO:0061053	somite development	0.011509	46.6114	94	2.01668	0.0232099	5.3185e-10	2.2418e-08	78	17.4593	32	1.83283	0.00761361	0.410256	0.00016969	0.00379099	GO Biological Process	FOOT
GO:1904953	Wnt signaling pathway involved in midbrain dopaminergic neuron differentiation	0.00198036	8.02046	31	3.86511	0.00765432	5.3487e-10	2.2418e-08	10	2.23838	7	3.12727	0.00166548	0.7	0.00175655	0.0277152	GO Biological Process	FOOT
GO:0060443	mammary gland morphogenesis	0.00784879	31.7876	72	2.26504	0.0177778	5.3494e-10	2.2418e-08	41	9.17735	19	2.07032	0.00452058	0.463415	0.0005867	0.0111405	GO Biological Process	FOOT
GO:0022405	hair cycle process	0.0108606	43.9855	90	2.04613	0.0222222	6.1842e-10	2.5352e-08	76	17.0117	37	2.17498	0.00880324	0.486842	4.0308e-07	1.798e-05	GO Biological Process	FOOT
GO:0051785	positive regulation of nuclear division	0.00676873	27.4134	65	2.37111	0.0160494	6.3087e-10	2.5702e-08	61	13.6541	25	1.83095	0.00594813	0.409836	0.00085796	0.0153395	GO Biological Process	FOOT
GO:0045668	negative regulation of osteoblast differentiation	0.00559054	22.6417	57	2.51748	0.0140741	8.6675e-10	3.4046e-08	41	9.17735	22	2.39721	0.00523436	0.536585	1.2597e-05	0.00038194	GO Biological Process	FOOT
GO:0048546	digestive tract morphogenesis	0.0101214	40.9917	85	2.07359	0.0209877	9.9834e-10	3.8753e-08	49	10.968	21	1.91465	0.00499643	0.428571	0.00109993	0.0189699	GO Biological Process	FOOT
GO:0042633	hair cycle	0.0112197	45.4399	91	2.00265	0.0224691	1.3815e-09	5.2847e-08	90	20.1454	38	1.88629	0.00904116	0.422222	2.0176e-05	0.00058737	GO Biological Process	FOOT
GO:0003156	regulation of animal organ formation	0.00852612	34.5308	75	2.17198	0.0185185	1.3976e-09	5.3306e-08	33	7.38664	23	3.11373	0.00547228	0.69697	8.9821e-09	5.6553e-07	GO Biological Process	FOOT
GO:0060039	pericardium development	0.00405794	16.4347	46	2.79896	0.011358	1.531e-09	5.8057e-08	20	4.47675	13	2.90389	0.00309303	0.65	5.3592e-05	0.00140337	GO Biological Process	FOOT
GO:0001942	hair follicle development	0.010438	42.2739	86	2.03435	0.0212346	1.9042e-09	6.9604e-08	73	16.3402	35	2.14196	0.00832739	0.479452	1.3009e-06	5.0053e-05	GO Biological Process	FOOT
GO:0002053	positive regulation of mesenchymal cell proliferation	0.00698228	28.2782	65	2.29859	0.0160494	2.061e-09	7.4508e-08	28	6.26745	19	3.03153	0.00452058	0.678571	3.518e-07	1.5908e-05	GO Biological Process	FOOT
GO:0032332	positive regulation of chondrocyte differentiation	0.00426301	17.2652	47	2.72224	0.0116049	2.4e-09	8.6288e-08	18	4.02908	13	3.22655	0.00309303	0.722222	9.3901e-06	0.00029185	GO Biological Process	FOOT
GO:0001658	branching involved in ureteric bud morphogenesis	0.00926129	37.5082	78	2.07954	0.0192593	4.2176e-09	1.4158e-07	44	9.84886	26	2.6399	0.00618606	0.590909	1.5992e-07	7.794e-06	GO Biological Process	FOOT
GO:0003401	axis elongation	0.00635095	25.7213	60	2.33269	0.0148148	4.9904e-09	1.6364e-07	26	5.81978	14	2.40559	0.00333095	0.538462	0.00046587	0.00916346	GO Biological Process	FOOT
GO:0032330	regulation of chondrocyte differentiation	0.01015	41.1074	83	2.0191	0.0204938	4.9991e-09	1.6364e-07	45	10.0727	26	2.58124	0.00618606	0.577778	2.9808e-07	1.3811e-05	GO Biological Process	FOOT
GO:0060363	cranial suture morphogenesis	0.0021004	8.5066	30	3.52667	0.00740741	7.727e-09	2.4483e-07	9	2.01454	7	3.47474	0.00166548	0.777778	0.00065387	0.0121701	GO Biological Process	FOOT
GO:0071542	dopaminergic neuron differentiation	0.00617648	25.0147	58	2.31863	0.014321	1.0915e-08	3.348e-07	30	6.71513	18	2.68051	0.00428266	0.6	9.8155e-06	0.00030178	GO Biological Process	FOOT
GO:0009948	anterior/posterior axis specification	0.00663126	26.8566	60	2.23409	0.0148148	2.2296e-08	6.4767e-07	51	11.4157	22	1.92717	0.00523436	0.431372	0.00075936	0.0137447	GO Biological Process	FOOT
GO:0043507	positive regulation of JUN kinase activity	0.00825749	33.4428	69	2.06322	0.017037	4.2529e-08	1.1882e-06	66	14.7733	25	1.69224	0.00594813	0.378788	0.00315337	0.0436332	GO Biological Process	FOOT
GO:0045992	negative regulation of embryonic development	0.00488019	19.7648	48	2.42856	0.0118519	5.0498e-08	1.3931e-06	26	5.81978	13	2.23376	0.00309303	0.5	0.00182325	0.0284553	GO Biological Process	FOOT
GO:0097094	craniofacial suture morphogenesis	0.00354352	14.3512	39	2.71753	0.00962963	5.4227e-08	1.4774e-06	18	4.02908	10	2.48196	0.00237925	0.555556	0.00226389	0.0338555	GO Biological Process	FOOT
GO:0048841	regulation of axon extension involved in axon guidance	0.00445885	18.0583	45	2.49193	0.0111111	6.3732e-08	1.708e-06	16	3.5814	10	2.7922	0.00237925	0.625	0.00064749	0.0121701	GO Biological Process	FOOT
GO:0048333	mesodermal cell differentiation	0.00433702	17.5649	44	2.50499	0.0108642	7.6856e-08	1.9948e-06	26	5.81978	14	2.40559	0.00333095	0.538462	0.00046587	0.00916346	GO Biological Process	FOOT
GO:0035116	embryonic hindlimb morphogenesis	0.00630202	25.5232	56	2.19408	0.0138272	1.136e-07	2.8758e-06	29	6.49129	19	2.927	0.00452058	0.655172	8.0538e-07	3.3432e-05	GO Biological Process	FOOT
GO:0002067	glandular epithelial cell differentiation	0.00692937	28.0639	59	2.10234	0.0145679	2.1284e-07	5.1674e-06	39	8.72967	18	2.06193	0.00428266	0.461539	0.00086321	0.0153915	GO Biological Process	FOOT
GO:0035137	hindlimb morphogenesis	0.00763216	30.9102	63	2.03816	0.0155556	2.4024e-07	5.7374e-06	37	8.28199	22	2.65637	0.00523436	0.594595	1.2458e-06	4.8502e-05	GO Biological Process	FOOT
GO:0030514	negative regulation of BMP signaling pathway	0.00748492	30.3139	62	2.04526	0.0153086	2.656e-07	6.2748e-06	48	10.7442	24	2.23376	0.00571021	0.5	2.4585e-05	0.00070791	GO Biological Process	FOOT
GO:0001702	gastrulation with mouth forming second	0.00476487	19.2977	45	2.33188	0.0111111	3.8515e-07	8.9229e-06	27	6.04362	13	2.15103	0.00309303	0.481482	0.00280202	0.0392671	GO Biological Process	FOOT
GO:1902667	regulation of axon guidance	0.00560092	22.6837	50	2.20423	0.0123457	4.5908e-07	1.0543e-05	21	4.70059	12	2.55287	0.0028551	0.571429	0.00058383	0.0111405	GO Biological Process	FOOT
GO:0060603	mammary gland duct morphogenesis	0.00519339	21.0332	47	2.23456	0.0116049	6.8983e-07	1.5464e-05	29	6.49129	14	2.15673	0.00333095	0.482759	0.00188197	0.0289986	GO Biological Process	FOOT
GO:0021532	neural tube patterning	0.00491497	19.9057	45	2.26066	0.0111111	8.6875e-07	1.9085e-05	34	7.61048	17	2.23376	0.00404473	0.5	0.00037393	0.0076288	GO Biological Process	FOOT
GO:0098868	bone growth	0.00354285	14.3485	36	2.50897	0.00888889	1.0645e-06	2.2964e-05	22	4.92443	15	3.04604	0.00356888	0.681818	5.7692e-06	0.00019241	GO Biological Process	FOOT
GO:0003416	endochondral bone growth	0.00340058	13.7723	35	2.54133	0.00864198	1.1253e-06	2.4195e-05	20	4.47675	14	3.12727	0.00333095	0.7	7.4691e-06	0.00024031	GO Biological Process	FOOT
GO:0021889	olfactory bulb interneuron differentiation	0.00412455	16.7044	39	2.33471	0.00962963	2.1361e-06	4.3988e-05	12	2.68605	8	2.97835	0.0019034	0.666667	0.00128554	0.0213861	GO Biological Process	FOOT
GO:0035115	embryonic forelimb morphogenesis	0.00596398	24.1541	49	2.02864	0.0120988	5.4849e-06	0.00010537	32	7.16281	18	2.51298	0.00428266	0.5625	3.3456e-05	0.00093076	GO Biological Process	FOOT
GO:0043586	tongue development	0.00354288	14.3486	34	2.36956	0.00839506	6.8122e-06	0.00012885	21	4.70059	14	2.97835	0.00333095	0.666667	1.7772e-05	0.00052672	GO Biological Process	FOOT
GO:0030318	melanocyte differentiation	0.00438423	17.7561	39	2.19642	0.00962963	8.479e-06	0.00015671	18	4.02908	11	2.73015	0.00261718	0.611111	0.00045229	0.00894985	GO Biological Process	FOOT
GO:0021871	forebrain regionalization	0.00422688	17.1189	37	2.16136	0.0091358	1.9838e-05	0.00033991	24	5.3721	14	2.60606	0.00333095	0.583333	0.00014989	0.00342423	GO Biological Process	FOOT
GO:0014911	positive regulation of smooth muscle cell migration	0.00457591	18.5324	39	2.10442	0.00962963	2.1484e-05	0.00036619	32	7.16281	18	2.51298	0.00428266	0.5625	3.3456e-05	0.00093076	GO Biological Process	FOOT
GO:0072273	metanephric nephron morphogenesis	0.0039418	15.9643	35	2.19239	0.00864198	2.4626e-05	0.00041176	21	4.70059	15	3.19109	0.00356888	0.714286	2.3175e-06	8.4713e-05	GO Biological Process	FOOT
GO:0033688	regulation of osteoblast proliferation	0.00301188	12.1981	29	2.37742	0.00716049	2.9125e-05	0.00047968	23	5.14827	12	2.33088	0.0028551	0.521739	0.00170686	0.027061	GO Biological Process	FOOT
GO:0002052	positive regulation of neuroblast proliferation	0.00430792	17.4471	37	2.1207	0.0091358	2.9324e-05	0.00048234	21	4.70059	11	2.34013	0.00261718	0.52381	0.00255193	0.0366203	GO Biological Process	FOOT
GO:0010092	specification of animal organ identity	0.00382125	15.4761	34	2.19694	0.00839506	3.0595e-05	0.00050137	15	3.35757	9	2.68051	0.00214133	0.6	0.0018412	0.0285376	GO Biological Process	FOOT
GO:0023019	signal transduction involved in regulation of gene expression	0.00309341	12.5283	29	2.31476	0.00716049	4.6286e-05	0.00073122	20	4.47675	11	2.45714	0.00261718	0.55	0.00152102	0.0247712	GO Biological Process	FOOT
GO:1901213	regulation of transcription from RNA polymerase II promoter involved in heart development	0.00282851	11.4555	26	2.26966	0.00641975	0.00014961	0.00210776	13	2.90989	8	2.74925	0.0019034	0.615385	0.00268695	0.0383487	GO Biological Process	FOOT
GO:0060442	branching involved in prostate gland morphogenesis	0.00207801	8.41594	21	2.49526	0.00518519	0.00018139	0.00250461	10	2.23838	7	3.12727	0.00166548	0.7	0.00175655	0.0277152	GO Biological Process	FOOT
GO:0002043	blood vessel endothelial cell proliferation involved in sprouting angiogenesis	0.00149465	6.05334	17	2.80837	0.00419753	0.00019082	0.00261831	7	1.56686	6	3.82931	0.00142755	0.857143	0.00070973	0.0129487	GO Biological Process	FOOT
GO:0021521	ventral spinal cord interneuron specification	0.0022705	9.19553	22	2.39247	0.0054321	0.00022934	0.00310537	11	2.46221	8	3.24911	0.0019034	0.727273	0.00053349	0.010385	GO Biological Process	FOOT
GO:0072087	renal vesicle development	0.00347513	14.0743	29	2.0605	0.00716049	0.00031564	0.00407204	14	3.13373	12	3.82931	0.0028551	0.857143	8.9655e-07	3.658e-05	GO Biological Process	FOOT
GO:0060592	mammary gland formation	0.00297822	12.0618	26	2.15557	0.00641975	0.00032418	0.00416585	7	1.56686	6	3.82931	0.00142755	0.857143	0.00070973	0.0129487	GO Biological Process	FOOT
GO:0072077	renal vesicle morphogenesis	0.00303042	12.2732	26	2.11844	0.00641975	0.00041795	0.00518442	13	2.90989	11	3.78021	0.00261718	0.846154	3.4525e-06	0.00012115	GO Biological Process	FOOT
GO:0071679	commissural neuron axon guidance	0.00165063	6.68506	17	2.54298	0.00419753	0.00057766	0.00691248	8	1.7907	6	3.35064	0.00142755	0.75	0.00229751	0.0338555	GO Biological Process	FOOT
GO:0033002	muscle cell proliferation	0.00331446	13.4236	27	2.01139	0.00666667	0.00070567	0.00822488	19	4.25292	11	2.58646	0.00261718	0.578947	0.00085721	0.0153395	GO Biological Process	FOOT
GO:0061304	retinal blood vessel morphogenesis	0.00046157	1.86938	8	4.27951	0.00197531	0.00071261	0.00829838	4	0.895351	4	4.46752	0.0009517	1	0.00250756	0.0361017	GO Biological Process	FOOT
GO:0003337	mesenchymal to epithelial transition involved in metanephros morphogenesis	0.00185044	7.49427	18	2.40184	0.00444444	0.00077318	0.00889362	8	1.7907	6	3.35064	0.00142755	0.75	0.00229751	0.0338555	GO Biological Process	FOOT
GO:0070166	enamel mineralization	0.00217687	8.81632	20	2.26852	0.00493827	0.00081626	0.00928366	11	2.46221	8	3.24911	0.0019034	0.727273	0.00053349	0.010385	GO Biological Process	FOOT
GO:0038065	collagen-activated signaling pathway	0.0012754	5.16538	14	2.71035	0.00345679	0.00093892	0.0105151	11	2.46221	8	3.24911	0.0019034	0.727273	0.00053349	0.010385	GO Biological Process	FOOT
GO:0071676	negative regulation of mononuclear cell migration	0.00144797	5.86427	15	2.55786	0.0037037	0.00111315	0.012166	6	1.34303	5	3.72294	0.00118963	0.833333	0.00273809	0.0387009	GO Biological Process	FOOT
GO:0072283	metanephric renal vesicle morphogenesis	0.00240789	9.75197	21	2.15341	0.00518519	0.00116137	0.0126337	11	2.46221	9	3.65525	0.00214133	0.818182	4.9216e-05	0.00130836	GO Biological Process	FOOT
GO:0061309	cardiac neural crest cell development involved in outflow tract morphogenesis	0.00161134	6.52593	16	2.45176	0.00395062	0.00119456	0.012927	6	1.34303	5	3.72294	0.00118963	0.833333	0.00273809	0.0387009	GO Biological Process	FOOT
GO:0060038	cardiac muscle cell proliferation	0.00261934	10.6083	22	2.07385	0.0054321	0.00143533	0.0150498	14	3.13373	9	2.87198	0.00214133	0.642857	0.00091878	0.0161851	GO Biological Process	FOOT
GO:0009129	pyrimidine nucleoside monophosphate metabolic process	0.00165238	6.69214	16	2.39086	0.00395062	0.00153553	0.0159705	15	3.35757	9	2.68051	0.00214133	0.6	0.0018412	0.0285376	GO Biological Process	FOOT
GO:1990000	amyloid fibril formation	0.00065107	2.63685	9	3.41316	0.00222222	0.001627	0.0167394	8	1.7907	6	3.35064	0.00142755	0.75	0.00229751	0.0338555	GO Biological Process	FOOT
GO:0060449	bud elongation involved in lung branching	0.00248223	10.0531	21	2.08892	0.00518519	0.00166572	0.0170313	6	1.34303	6	4.46752	0.00142755	1	0.00012543	0.00292175	GO Biological Process	FOOT
GO:0035581	sequestering of extracellular ligand from receptor	0.00137014	5.54906	14	2.52295	0.00345679	0.00181036	0.0182685	8	1.7907	6	3.35064	0.00142755	0.75	0.00229751	0.0338555	GO Biological Process	FOOT
GO:0061299	retina vasculature morphogenesis in camera-type eye	0.00129576	5.24782	13	2.47722	0.00320988	0.00301002	0.0279724	9	2.01454	7	3.47474	0.00166548	0.777778	0.00065387	0.0121701	GO Biological Process	FOOT
GO:0072161	mesenchymal cell differentiation involved in kidney development	0.00184349	7.46612	16	2.14301	0.00395062	0.0043822	0.038467	8	1.7907	6	3.35064	0.00142755	0.75	0.00229751	0.0338555	GO Biological Process	FOOT
GO:0050923	regulation of negative chemotaxis	0.00206345	8.35699	17	2.03423	0.00419753	0.00559328	0.0473629	4	0.895351	4	4.46752	0.0009517	1	0.00250756	0.0361017	GO Biological Process	FOOT
GO:0030669	clathrin-coated endocytic vesicle membrane	0.00577401	23.3847	53	2.26644	0.0130864	9.1594e-08	6.331e-06	48	10.7442	22	2.04761	0.00523436	0.458333	0.00026977	0.0105039	GO Cellular Component	FOOT
GO:0005160	transforming growth factor beta receptor binding	0.00669834	27.1283	59	2.17485	0.0145679	7.0873e-08	1.2468e-05	49	10.968	25	2.27935	0.00594813	0.510204	1.0608e-05	0.00139959	GO Molecular Function	FOOT
GO:0070411	I-SMAD binding	0.0020989	8.50053	22	2.58807	0.0054321	7.7747e-05	0.00468925	11	2.46221	8	3.24911	0.0019034	0.727273	0.00053349	0.0320697	GO Molecular Function	FOOT
HP:0009774	Triangular shaped phalanges of the hand	0.0123962	50.2045	104	2.07153	0.025679	1.523e-11	8.4689e-09	76	17.0117	30	1.7635	0.00713776	0.394737	0.00058556	0.0337505	Human Phenotype	FOOT
HP:0001363	Craniosynostosis	0.00766524	31.0442	72	2.31927	0.0177778	1.9977e-10	6.6652e-08	57	12.7587	24	1.88106	0.00571021	0.421053	0.00068161	0.0372816	Human Phenotype	FOOT
HP:0006101	Finger syndactyly	0.00733739	29.7164	60	2.01909	0.0148148	6.1478e-07	3.1079e-05	40	8.95351	21	2.34545	0.00499643	0.525	3.0687e-05	0.00455049	Human Phenotype	FOOT
HP:0000072	Hydroureter	0.0042459	17.1959	38	2.20983	0.00938272	9.6149e-06	0.00034	17	3.80524	11	2.89075	0.00261718	0.647059	0.00022053	0.0173129	Human Phenotype	FOOT
HP:0008053	Aplasia/Hypoplasia of the iris	0.00395362	16.0122	34	2.12339	0.00839506	5.8605e-05	0.00161601	29	6.49129	15	2.31079	0.00356888	0.517241	0.0005179	0.0319995	Human Phenotype	FOOT
HP:0004122	Midline defect of the nose	0.0016067	6.50713	17	2.61252	0.00419753	0.00042988	0.00754884	7	1.56686	6	3.82931	0.00142755	0.857143	0.00070973	0.0381938	Human Phenotype	FOOT
HP:0100266	Synostosis of carpals/tarsals	0.0030616	12.3995	26	2.09686	0.00641975	0.00048469	0.00831442	22	4.92443	12	2.43683	0.0028551	0.545454	0.00102371	0.0461567	Human Phenotype	FOOT
HP:0001360	Holoprosencephaly	0.00290877	11.7805	25	2.12215	0.00617284	0.00051958	0.00873341	14	3.13373	9	2.87198	0.00214133	0.642857	0.00091878	0.0433949	Human Phenotype	FOOT
HP:0004327	Abnormality of the vitreous humor	0.00259811	10.5223	23	2.18583	0.00567901	0.00057495	0.00945432	19	4.25292	11	2.58646	0.00261718	0.578947	0.00085721	0.042688	Human Phenotype	FOOT
HP:0000813	Bicornuate uterus	0.00287878	11.6591	24	2.05849	0.00592593	0.00099466	0.014652	17	3.80524	11	2.89075	0.00261718	0.647059	0.00022053	0.0173129	Human Phenotype	FOOT
MP:0003189	fused joints	0.0232607	94.2058	193	2.04871	0.0476543	9.89e-20	2.364e-17	168	37.6047	65	1.72851	0.0154651	0.386905	1.2703e-06	2.8712e-05	Mouse Phenotype	FOOT
MP:0004609	vertebral fusion	0.0209406	84.8096	172	2.02807	0.0424691	2.5251e-17	4.2356e-15	156	34.9187	59	1.68964	0.0140376	0.378205	8.8196e-06	0.00015757	Mouse Phenotype	FOOT
MP:0003119	abnormal digestive system development	0.0186791	75.6503	155	2.0489	0.0382716	4.1763e-16	5.5839e-14	104	23.2791	53	2.27672	0.01261	0.509615	1.5952e-10	7.9436e-09	Mouse Phenotype	FOOT
MP:0000081	premature suture closure	0.00311614	12.6204	50	3.96184	0.0123457	1.3746e-15	1.6637e-13	13	2.90989	12	4.12387	0.0028551	0.923077	1.6128e-07	4.6585e-06	Mouse Phenotype	FOOT
MP:0011999	abnormal tail length	0.0184612	74.7678	151	2.01959	0.037284	3.1342e-15	3.6544e-13	116	25.9652	56	2.15673	0.0133238	0.482759	7.0257e-10	3.1243e-08	Mouse Phenotype	FOOT
MP:0011772	genital tubercle hypoplasia	0.00200394	8.11594	39	4.80536	0.00962963	4.7603e-15	5.2314e-13	7	1.56686	7	4.46752	0.00166548	1	2.8044e-05	0.00044246	Mouse Phenotype	FOOT
MP:0003048	abnormal cervical vertebrae morphology	0.0165047	66.8441	135	2.01963	0.0333333	9.1236e-14	7.93e-12	141	31.5611	56	1.77433	0.0133238	0.397163	2.61e-06	5.3896e-05	Mouse Phenotype	FOOT
MP:0003120	abnormal tracheal cartilage morphology	0.00831169	33.6623	84	2.49537	0.0207407	1.6624e-13	1.3821e-11	36	8.05816	20	2.48196	0.00475851	0.555556	1.5742e-05	0.0002678	Mouse Phenotype	FOOT
MP:0005222	abnormal somite size	0.00737463	29.8672	76	2.54459	0.0187654	9.2228e-13	6.6802e-11	51	11.4157	24	2.10236	0.00571021	0.470588	8.5909e-05	0.00115039	Mouse Phenotype	FOOT
MP:0001178	pulmonary hypoplasia	0.0110435	44.7263	99	2.21346	0.0244444	1.2776e-12	9.1158e-11	63	14.1018	28	1.98557	0.00666191	0.444444	8.1624e-05	0.00110383	Mouse Phenotype	FOOT
MP:0002544	brachydactyly	0.00575933	23.3253	64	2.7438	0.0158025	2.5707e-12	1.7556e-10	36	8.05816	17	2.10966	0.00404473	0.472222	0.00086606	0.0080004	Mouse Phenotype	FOOT
MP:0011771	abnormal genital tubercle morphology	0.00294946	11.9453	43	3.59973	0.0106173	2.7287e-12	1.8503e-10	10	2.23838	9	4.02077	0.00214133	0.9	1.1194e-05	0.00019674	Mouse Phenotype	FOOT
MP:0011732	decreased somite size	0.00626861	25.3879	67	2.63905	0.0165432	4.2686e-12	2.7764e-10	38	8.50583	20	2.35133	0.00475851	0.526316	4.5142e-05	0.00067022	Mouse Phenotype	FOOT
MP:0000018	small ears	0.00512719	20.7651	59	2.8413	0.0145679	4.6464e-12	3.0016e-10	32	7.16281	17	2.37337	0.00404473	0.53125	0.00014438	0.00179744	Mouse Phenotype	FOOT
MP:0014139	abnormal ectoderm morphology	0.00906686	36.7208	85	2.31477	0.0209877	5.4128e-12	3.4733e-10	45	10.0727	31	3.07763	0.00737568	0.688889	3.6224e-11	1.9791e-09	Mouse Phenotype	FOOT
MP:0004355	short radius	0.0100927	40.8753	91	2.22628	0.0224691	7.5232e-12	4.6406e-10	55	12.3111	24	1.94947	0.00571021	0.436364	0.00036147	0.00398622	Mouse Phenotype	FOOT
MP:0001676	abnormal apical ectodermal ridge morphology	0.00794113	32.1616	77	2.39416	0.0190124	1.1363e-11	6.7481e-10	39	8.72967	28	3.20745	0.00666191	0.717949	6.8786e-11	3.7156e-09	Mouse Phenotype	FOOT
MP:0009907	decreased tongue size	0.00471175	19.0826	55	2.88221	0.0135803	1.4263e-11	8.2649e-10	24	5.3721	14	2.60606	0.00333095	0.583333	0.00014989	0.0018563	Mouse Phenotype	FOOT
MP:0002543	brachyphalangia	0.00338327	13.7022	45	3.28414	0.0111111	1.6872e-11	9.6019e-10	21	4.70059	13	2.76561	0.00309303	0.619048	0.0001118	0.00145628	Mouse Phenotype	FOOT
MP:0000561	adactyly	0.00321852	13.035	43	3.29881	0.0106173	4.0843e-11	2.1694e-09	9	2.01454	8	3.97113	0.0019034	0.888889	4.5214e-05	0.00067022	Mouse Phenotype	FOOT
MP:0004726	abnormal nasal capsule morphology	0.00756511	30.6387	73	2.38261	0.0180247	4.7211e-11	2.4802e-09	30	6.71513	22	3.27618	0.00523436	0.733333	4.1276e-09	1.6307e-07	Mouse Phenotype	FOOT
MP:0005225	abnormal vertebrae development	0.0126729	51.3251	104	2.0263	0.025679	5.1065e-11	2.6444e-09	72	16.1163	32	1.98557	0.00761361	0.444444	2.6023e-05	0.00041746	Mouse Phenotype	FOOT
MP:0002230	abnormal primitive streak formation	0.00871307	35.2879	79	2.23873	0.0195062	1.3548e-10	6.542e-09	67	14.9971	27	1.80035	0.00642398	0.402985	0.00074153	0.00703348	Mouse Phenotype	FOOT
MP:0000154	rib fusion	0.0117076	47.4158	97	2.04573	0.0239506	1.3769e-10	6.5824e-09	98	21.9361	34	1.54996	0.00808946	0.346939	0.00356806	0.0248646	Mouse Phenotype	FOOT
MP:0009705	abnormal midgut morphology	0.0021071	8.53374	33	3.867	0.00814815	1.4983e-10	7.057e-09	7	1.56686	5	3.19109	0.00118963	0.714286	0.00780898	0.0449769	Mouse Phenotype	FOOT
MP:0001727	abnormal embryo implantation	0.00813924	32.9639	75	2.27521	0.0185185	1.9539e-10	9.0247e-09	65	14.5495	29	1.9932	0.00689983	0.446154	5.6237e-05	0.00079894	Mouse Phenotype	FOOT
MP:0003416	premature bone ossification	0.00566311	22.9356	59	2.57242	0.0145679	2.0154e-10	9.2278e-09	26	5.81978	16	2.74925	0.00380681	0.615385	1.9744e-05	0.00032443	Mouse Phenotype	FOOT
MP:0008273	abnormal intramembranous bone ossification	0.0102762	41.6186	88	2.11444	0.0217284	2.0323e-10	9.2528e-09	59	13.2064	34	2.5745	0.00808946	0.576271	4.988e-09	1.9466e-07	Mouse Phenotype	FOOT
MP:0005170	cleft upper lip	0.00643478	26.0609	64	2.45579	0.0158025	2.2098e-10	9.966e-09	34	7.61048	17	2.23376	0.00404473	0.5	0.00037393	0.00409996	Mouse Phenotype	FOOT
MP:0011024	abnormal branching involved in lung morphogenesis	0.00909834	36.8483	80	2.17107	0.0197531	4.1219e-10	1.7515e-08	39	8.72967	24	2.74925	0.00571021	0.615385	1.636e-07	4.7113e-06	Mouse Phenotype	FOOT
MP:0003604	single kidney	0.00845858	34.2572	76	2.21851	0.0187654	4.4289e-10	1.8736e-08	47	10.5204	29	2.75656	0.00689983	0.617021	7.689e-09	2.8943e-07	Mouse Phenotype	FOOT
MP:0004359	short ulna	0.0110667	44.8202	91	2.03033	0.0224691	7.2155e-10	2.9109e-08	59	13.2064	27	2.04446	0.00642398	0.457627	5.8448e-05	0.000823	Mouse Phenotype	FOOT
MP:0006301	abnormal mesenchyme morphology	0.0021295	8.62447	32	3.71037	0.00790124	7.5712e-10	3.0225e-08	19	4.25292	10	2.35133	0.00237925	0.526316	0.00382685	0.0262284	Mouse Phenotype	FOOT
MP:0003073	abnormal metacarpal bone morphology	0.00749194	30.3423	69	2.27405	0.017037	1.0318e-09	4.01e-08	44	9.84886	25	2.53837	0.00594813	0.568182	7.794e-07	1.877e-05	Mouse Phenotype	FOOT
MP:0004452	abnormal pterygoid process morphology	0.00593508	24.0371	59	2.45454	0.0145679	1.1084e-09	4.2905e-08	29	6.49129	23	3.54321	0.00547228	0.793103	1.2008e-10	6.2396e-09	Mouse Phenotype	FOOT
MP:0000492	abnormal rectum morphology	0.0078366	31.7382	71	2.23705	0.0175309	1.1612e-09	4.441e-08	53	11.8634	23	1.93874	0.00547228	0.433962	0.00052401	0.00541629	Mouse Phenotype	FOOT
MP:0005104	abnormal tarsal bone morphology	0.00835835	33.8513	74	2.18603	0.0182716	1.3732e-09	5.1689e-08	45	10.0727	29	2.87907	0.00689983	0.644444	1.7622e-09	7.3575e-08	Mouse Phenotype	FOOT
MP:0012523	abnormal upper lip morphology	0.00775455	31.4059	70	2.22888	0.0172839	1.7492e-09	6.4886e-08	42	9.40118	20	2.12739	0.00475851	0.476191	0.00026982	0.00308951	Mouse Phenotype	FOOT
MP:0009053	abnormal anal canal morphology	0.00795118	32.2023	71	2.20481	0.0175309	2.0784e-09	7.5845e-08	38	8.50583	20	2.35133	0.00475851	0.526316	4.5142e-05	0.00067022	Mouse Phenotype	FOOT
MP:0003052	omphalocele	0.0106368	43.0792	87	2.01953	0.0214815	2.1457e-09	7.8005e-08	62	13.8779	30	2.1617	0.00713776	0.483871	5.7902e-06	0.00010791	Mouse Phenotype	FOOT
MP:0008430	short squamosal bone	0.00047505	1.92396	15	7.79642	0.0037037	2.2777e-09	8.1867e-08	4	0.895351	4	4.46752	0.0009517	1	0.00250756	0.0189076	Mouse Phenotype	FOOT
MP:0000484	abnormal pulmonary artery morphology	0.0107054	43.3567	87	2.00661	0.0214815	2.8676e-09	1.0155e-07	67	14.9971	32	2.13374	0.00761361	0.477612	4.0645e-06	7.947e-05	Mouse Phenotype	FOOT
MP:0004423	abnormal squamosal bone morphology	0.00632241	25.6058	60	2.34322	0.0148148	4.258e-09	1.4087e-07	36	8.05816	23	2.85425	0.00547228	0.638889	1.0952e-07	3.2722e-06	Mouse Phenotype	FOOT
MP:0009743	preaxial polydactyly	0.00493808	19.9992	51	2.5501	0.0125926	4.2864e-09	1.4132e-07	45	10.0727	20	1.98557	0.00475851	0.444444	0.00082472	0.00773052	Mouse Phenotype	FOOT
MP:0002982	abnormal primordial germ cell migration	0.00282475	11.4402	36	3.14679	0.00888889	4.9141e-09	1.5981e-07	11	2.46221	8	3.24911	0.0019034	0.727273	0.00053349	0.00548467	Mouse Phenotype	FOOT
MP:0004936	impaired branching involved in ureteric bud morphogenesis	0.00998578	40.4424	82	2.02758	0.0202469	5.1503e-09	1.6524e-07	56	12.5349	32	2.55287	0.00761361	0.571429	1.8677e-08	6.4934e-07	Mouse Phenotype	FOOT
MP:0000554	abnormal carpal bone morphology	0.00720972	29.1993	65	2.22608	0.0160494	6.804e-09	2.147e-07	41	9.17735	24	2.61514	0.00571021	0.585366	6.1184e-07	1.5314e-05	Mouse Phenotype	FOOT
MP:0010985	abnormal kidney mesenchyme morphology	0.00890848	36.0793	75	2.07875	0.0185185	8.3978e-09	2.6069e-07	40	8.95351	26	2.90389	0.00618606	0.65	9.4086e-09	3.4732e-07	Mouse Phenotype	FOOT
MP:0002260	abnormal thyroid cartilage morphology	0.00430436	17.4327	46	2.63872	0.011358	8.8355e-09	2.7115e-07	26	5.81978	15	2.57742	0.00356888	0.576923	0.0001032	0.00134979	Mouse Phenotype	FOOT
MP:0020363	abnormal germ cell physiology	0.00421296	17.0625	45	2.63736	0.0111111	1.2906e-08	3.8322e-07	22	4.92443	12	2.43683	0.0028551	0.545454	0.00102371	0.00927741	Mouse Phenotype	FOOT
MP:0002264	abnormal bronchus morphology	0.00844612	34.2068	71	2.07561	0.0175309	2.1815e-08	6.2824e-07	50	11.1919	22	1.96571	0.00523436	0.44	0.00054613	0.00559049	Mouse Phenotype	FOOT
MP:0003235	abnormal alisphenoid bone morphology	0.00583379	23.6269	55	2.32786	0.0135803	2.2604e-08	6.4704e-07	33	7.38664	22	2.97835	0.00523436	0.666667	6.6717e-08	2.1192e-06	Mouse Phenotype	FOOT
MP:0005034	abnormal anus morphology	0.00714587	28.9408	63	2.17686	0.0155556	2.5342e-08	7.1053e-07	32	7.16281	17	2.37337	0.00404473	0.53125	0.00014438	0.00179744	Mouse Phenotype	FOOT
MP:0006020	decreased tympanic ring size	0.00421462	17.0692	44	2.57774	0.0108642	3.5079e-08	9.5553e-07	22	4.92443	17	3.45218	0.00404473	0.772727	7.0063e-08	2.1963e-06	Mouse Phenotype	FOOT
MP:0010975	abnormal lung lobe morphology	0.00743456	30.11	64	2.12554	0.0158025	4.5841e-08	1.2243e-06	39	8.72967	18	2.06193	0.00428266	0.461539	0.00086321	0.0079972	Mouse Phenotype	FOOT
MP:0013916	decreased intestine length	0.00411838	16.6794	43	2.57802	0.0106173	4.9626e-08	1.3107e-06	27	6.04362	13	2.15103	0.00309303	0.481482	0.00280202	0.0202802	Mouse Phenotype	FOOT
MP:0005262	coloboma	0.00732378	29.6613	63	2.12398	0.0155556	5.956e-08	1.5644e-06	44	9.84886	24	2.43683	0.00571021	0.545454	3.4764e-06	6.9245e-05	Mouse Phenotype	FOOT
MP:0003769	abnormal lip morphology	0.0085061	34.4497	70	2.03195	0.0172839	6.0031e-08	1.5725e-06	52	11.6396	20	1.71828	0.00475851	0.384615	0.0064309	0.0388168	Mouse Phenotype	FOOT
MP:0008392	decreased primordial germ cell number	0.00540307	21.8824	51	2.33064	0.0125926	6.8971e-08	1.7822e-06	37	8.28199	16	1.9319	0.00380681	0.432432	0.00375097	0.0259689	Mouse Phenotype	FOOT
MP:0003072	abnormal metatarsal bone morphology	0.00621018	25.1512	56	2.22653	0.0138272	7.1423e-08	1.8357e-06	40	8.95351	20	2.23376	0.00475851	0.5	0.00011577	0.00150389	Mouse Phenotype	FOOT
MP:0002256	abnormal laryngeal cartilage morphology	0.00672938	27.254	59	2.16482	0.0145679	8.2484e-08	2.0974e-06	35	7.83432	18	2.29758	0.00428266	0.514286	0.00015956	0.00194334	Mouse Phenotype	FOOT
MP:0030131	abnormal periodontium morphology	0.00408968	16.5632	42	2.53574	0.0103704	1.0874e-07	2.7146e-06	29	6.49129	14	2.15673	0.00333095	0.482759	0.00188197	0.015146	Mouse Phenotype	FOOT
MP:0004462	small basisphenoid bone	0.00265728	10.762	32	2.97343	0.00790124	1.1789e-07	2.9277e-06	17	3.80524	12	3.15355	0.0028551	0.705882	3.0609e-05	0.00048055	Mouse Phenotype	FOOT
MP:0013956	decreased colon length	0.00396429	16.0554	41	2.55366	0.0101235	1.2761e-07	3.1445e-06	22	4.92443	12	2.43683	0.0028551	0.545454	0.00102371	0.00927741	Mouse Phenotype	FOOT
MP:0004181	abnormal carotid artery morphology	0.00716085	29.0015	61	2.10334	0.0150617	1.3207e-07	3.246e-06	50	11.1919	20	1.78701	0.00475851	0.4	0.00382506	0.0262284	Mouse Phenotype	FOOT
MP:0000084	abnormal fontanelle morphology	0.00505002	20.4526	48	2.34689	0.0118519	1.3476e-07	3.2927e-06	28	6.26745	15	2.39332	0.00356888	0.535714	0.00031491	0.00351733	Mouse Phenotype	FOOT
MP:0002267	abnormal bronchiole morphology	0.00750185	30.3825	63	2.07356	0.0155556	1.35e-07	3.2927e-06	51	11.4157	24	2.10236	0.00571021	0.470588	8.5909e-05	0.00115039	Mouse Phenotype	FOOT
MP:0009914	abnormal hyoid bone lesser horn morphology	0.00324289	13.1337	36	2.74104	0.00888889	1.4032e-07	3.4138e-06	14	3.13373	10	3.19109	0.00237925	0.714286	0.00012681	0.00160586	Mouse Phenotype	FOOT
MP:0010982	abnormal ureteric bud elongation	0.0036932	14.9574	39	2.6074	0.00962963	1.5248e-07	3.7001e-06	21	4.70059	12	2.55287	0.0028551	0.571429	0.00058383	0.00586966	Mouse Phenotype	FOOT
MP:0008391	abnormal primordial germ cell morphology	0.00574745	23.2772	52	2.23395	0.0128395	1.8494e-07	4.4205e-06	40	8.95351	17	1.8987	0.00404473	0.425	0.00354713	0.0247548	Mouse Phenotype	FOOT
MP:0004459	small alisphenoid bone	0.00328724	13.3133	36	2.70406	0.00888889	1.9278e-07	4.5965e-06	16	3.5814	13	3.62986	0.00309303	0.8125	9.7442e-07	2.2723e-05	Mouse Phenotype	FOOT
MP:0004596	abnormal mandibular angle morphology	0.00346793	14.0451	37	2.63437	0.0091358	2.4489e-07	5.6831e-06	13	2.90989	11	3.78021	0.00261718	0.846154	3.4525e-06	6.8912e-05	Mouse Phenotype	FOOT
MP:0002249	abnormal larynx morphology	0.00769473	31.1637	63	2.02159	0.0155556	3.1478e-07	7.1658e-06	46	10.2965	21	2.03952	0.00499643	0.456522	0.00039511	0.00430252	Mouse Phenotype	FOOT
MP:0004784	abnormal anterior cardinal vein morphology	0.00282147	11.427	32	2.80039	0.00790124	4.2659e-07	9.4439e-06	15	3.35757	9	2.68051	0.00214133	0.6	0.0018412	0.0148932	Mouse Phenotype	FOOT
MP:0003924	diaphragmatic hernia	0.00594444	24.075	52	2.15992	0.0128395	4.9572e-07	1.0796e-05	35	7.83432	17	2.16994	0.00404473	0.485714	0.0005764	0.00583169	Mouse Phenotype	FOOT
MP:0013509	abnormal CD4-negative NK T cell number	0.00140977	5.70957	21	3.67804	0.00518519	6.5615e-07	1.3879e-05	7	1.56686	5	3.19109	0.00118963	0.714286	0.00780898	0.0449769	Mouse Phenotype	FOOT
MP:0000474	abnormal foregut morphology	0.00705284	28.564	58	2.03053	0.014321	7.8722e-07	1.6362e-05	38	8.50583	19	2.23376	0.00452058	0.5	0.00017093	0.00207393	Mouse Phenotype	FOOT
MP:0003827	abnormal Wolffian duct morphology	0.00691698	28.0138	57	2.03471	0.0140741	9.1538e-07	1.8582e-05	43	9.62502	21	2.18181	0.00499643	0.488372	0.00012121	0.00156602	Mouse Phenotype	FOOT
MP:0009806	abnormal otic vesicle morphology	0.00726267	29.4138	59	2.00586	0.0145679	9.2822e-07	1.8777e-05	35	7.83432	20	2.55287	0.00475851	0.571429	8.8589e-06	0.00015757	Mouse Phenotype	FOOT
MP:0004506	abnormal pubis morphology	0.00624886	25.3079	53	2.09421	0.0130864	9.5145e-07	1.9111e-05	24	5.3721	16	2.97835	0.00380681	0.666667	4.3616e-06	8.4076e-05	Mouse Phenotype	FOOT
MP:0013496	abnormal trachea development	0.00222783	9.02271	27	2.99245	0.00666667	9.7173e-07	1.9315e-05	7	1.56686	5	3.19109	0.00118963	0.714286	0.00780898	0.0449769	Mouse Phenotype	FOOT
MP:0008854	bleb	0.00250879	10.1606	29	2.85417	0.00716049	9.978e-07	1.9711e-05	9	2.01454	9	4.46752	0.00214133	1	1.4012e-06	3.0869e-05	Mouse Phenotype	FOOT
MP:0010856	dilated respiratory conducting tubes	0.00514811	20.8498	46	2.20625	0.011358	1.2553e-06	2.3782e-05	24	5.3721	16	2.97835	0.00380681	0.666667	4.3616e-06	8.4076e-05	Mouse Phenotype	FOOT
MP:0004320	split sternum	0.00485264	19.6532	44	2.23882	0.0108642	1.4577e-06	2.7274e-05	27	6.04362	13	2.15103	0.00309303	0.481482	0.00280202	0.0202802	Mouse Phenotype	FOOT
MP:0000133	abnormal long bone metaphysis morphology	0.00585445	23.7105	50	2.10877	0.0123457	1.5682e-06	2.9001e-05	48	10.7442	21	1.95454	0.00499643	0.4375	0.00079435	0.00749732	Mouse Phenotype	FOOT
MP:0004453	abnormal pterygoid bone morphology	0.00271683	11.0032	30	2.72648	0.00740741	1.6254e-06	2.9943e-05	15	3.35757	13	3.87185	0.00309303	0.866667	2.3034e-07	6.2743e-06	Mouse Phenotype	FOOT
MP:0011028	impaired branching involved in bronchus morphogenesis	0.00320085	12.9635	33	2.54562	0.00814815	2.1586e-06	3.9162e-05	12	2.68605	9	3.35064	0.00214133	0.75	0.00015747	0.00192532	Mouse Phenotype	FOOT
MP:0004639	fused metacarpal bones	0.0011597	4.69677	18	3.83242	0.00444444	2.2824e-06	4.133e-05	7	1.56686	5	3.19109	0.00118963	0.714286	0.00780898	0.0449769	Mouse Phenotype	FOOT
MP:0000039	abnormal otic capsule morphology	0.00431291	17.4673	40	2.29	0.00987654	2.5139e-06	4.4758e-05	21	4.70059	15	3.19109	0.00356888	0.714286	2.3175e-06	4.8592e-05	Mouse Phenotype	FOOT
MP:0011334	abnormal nephrogenic zone morphology	0.00431756	17.4861	40	2.28753	0.00987654	2.5779e-06	4.5812e-05	16	3.5814	13	3.62986	0.00309303	0.8125	9.7442e-07	2.2723e-05	Mouse Phenotype	FOOT
MP:0011364	abnormal metanephros morphology	0.00400342	16.2139	38	2.34368	0.00938272	2.6228e-06	4.6524e-05	27	6.04362	16	2.64742	0.00380681	0.592593	3.8383e-05	0.00058812	Mouse Phenotype	FOOT
MP:0003841	abnormal lambdoidal suture morphology	0.00141882	5.74623	20	3.48054	0.00493827	2.7028e-06	4.7678e-05	7	1.56686	5	3.19109	0.00118963	0.714286	0.00780898	0.0449769	Mouse Phenotype	FOOT
MP:0010802	abnormal intestinal enteroendocrine cell morphology	0.00145133	5.87787	20	3.40259	0.00493827	3.7599e-06	6.4771e-05	12	2.68605	8	2.97835	0.0019034	0.666667	0.00128554	0.011194	Mouse Phenotype	FOOT
MP:0012132	abnormal midbrain-hindbrain boundary morphology	0.00376346	15.242	36	2.36189	0.00888889	4.0007e-06	6.8796e-05	22	4.92443	13	2.6399	0.00309303	0.590909	0.00021727	0.00255833	Mouse Phenotype	FOOT
MP:0002621	delayed neural tube closure	0.00490901	19.8815	43	2.16281	0.0106173	4.4092e-06	7.4969e-05	35	7.83432	15	1.91465	0.00356888	0.428571	0.00547796	0.035083	Mouse Phenotype	FOOT
MP:0013721	abnormal mammary placode morphology	0.00147065	5.95614	20	3.35788	0.00493827	4.5535e-06	7.7054e-05	4	0.895351	4	4.46752	0.0009517	1	0.00250756	0.0189076	Mouse Phenotype	FOOT
MP:0003792	abnormal major salivary gland morphology	0.00592643	24.002	49	2.04149	0.0120988	4.656e-06	7.8511e-05	40	8.95351	18	2.01038	0.00428266	0.45	0.00124413	0.0110242	Mouse Phenotype	FOOT
MP:0003408	increased width of hypertrophic chondrocyte zone	0.0056666	22.9497	47	2.04795	0.0116049	6.6318e-06	0.00010876	48	10.7442	20	1.86147	0.00475851	0.416667	0.00216257	0.0170879	Mouse Phenotype	FOOT
MP:0002237	abnormal nasal cavity morphology	0.00338866	13.7241	33	2.40453	0.00814815	6.8816e-06	0.00011247	26	5.81978	14	2.40559	0.00333095	0.538462	0.00046587	0.00491629	Mouse Phenotype	FOOT
MP:0005313	absent adrenal gland	0.00222147	8.99695	25	2.77872	0.00617284	8.345e-06	0.00013387	9	2.01454	7	3.47474	0.00166548	0.777778	0.00065387	0.00637923	Mouse Phenotype	FOOT
MP:0000528	delayed kidney development	0.00358684	14.5267	34	2.34052	0.00839506	8.7494e-06	0.00013873	22	4.92443	15	3.04604	0.00356888	0.681818	5.7692e-06	0.00010773	Mouse Phenotype	FOOT
MP:0000023	abnormal ear position	0.00540076	21.8731	45	2.05733	0.0111111	9.1946e-06	0.00014489	34	7.61048	17	2.23376	0.00404473	0.5	0.00037393	0.00409996	Mouse Phenotype	FOOT
MP:0008919	fused tarsal bones	0.00253033	10.2478	27	2.6347	0.00666667	9.5105e-06	0.00014907	15	3.35757	8	2.38268	0.0019034	0.533333	0.00870541	0.0490179	Mouse Phenotype	FOOT
MP:0010743	delayed suture closure	0.0021011	8.50947	24	2.82039	0.00592593	9.8521e-06	0.00015364	15	3.35757	9	2.68051	0.00214133	0.6	0.0018412	0.0148932	Mouse Phenotype	FOOT
MP:0003417	premature endochondral bone ossification	0.00269112	10.899	28	2.56904	0.00691358	1.0326e-05	0.00015976	8	1.7907	6	3.35064	0.00142755	0.75	0.00229751	0.0177867	Mouse Phenotype	FOOT
MP:0004610	small vertebrae	0.00477348	19.3326	41	2.12077	0.0101235	1.1314e-05	0.00017228	24	5.3721	13	2.41991	0.00309303	0.541667	0.00069009	0.0066781	Mouse Phenotype	FOOT
MP:0004594	abnormal mandibular coronoid process morphology	0.00477828	19.352	41	2.11864	0.0101235	1.1573e-05	0.00017592	23	5.14827	15	2.9136	0.00356888	0.652174	1.3142e-05	0.00022721	Mouse Phenotype	FOOT
MP:0006030	abnormal otic vesicle development	0.00512014	20.7366	43	2.07363	0.0106173	1.1916e-05	0.00018027	24	5.3721	13	2.41991	0.00309303	0.541667	0.00069009	0.0066781	Mouse Phenotype	FOOT
MP:0002750	exophthalmos	0.00245656	9.94908	26	2.61331	0.00641975	1.575e-05	0.00023167	20	4.47675	11	2.45714	0.00261718	0.55	0.00152102	0.0129382	Mouse Phenotype	FOOT
MP:0004135	abnormal mammary gland embryonic development	0.00307536	12.4552	30	2.40863	0.00740741	1.6946e-05	0.00024698	12	2.68605	9	3.35064	0.00214133	0.75	0.00015747	0.00192532	Mouse Phenotype	FOOT
MP:0004337	clavicle hypoplasia	0.00219736	8.89931	24	2.69684	0.00592593	2.0024e-05	0.00028789	10	2.23838	7	3.12727	0.00166548	0.7	0.00175655	0.0145029	Mouse Phenotype	FOOT
MP:0010030	abnormal orbit morphology	0.00327729	13.273	31	2.33556	0.00765432	2.202e-05	0.00031229	19	4.25292	10	2.35133	0.00237925	0.526316	0.00382685	0.0262284	Mouse Phenotype	FOOT
MP:0010280	increased skeletal tumor incidence	0.00463258	18.7619	39	2.07868	0.00962963	2.7909e-05	0.00038505	33	7.38664	18	2.43683	0.00428266	0.545454	5.8227e-05	0.00082232	Mouse Phenotype	FOOT
MP:0009883	palatal shelf hypoplasia	0.00463648	18.7778	39	2.07693	0.00962963	2.8411e-05	0.00039085	20	4.47675	12	2.68051	0.0028551	0.6	0.0003141	0.00351652	Mouse Phenotype	FOOT
MP:0010976	small lung lobe	0.00254799	10.3194	26	2.51954	0.00641975	2.8751e-05	0.00039496	11	2.46221	8	3.24911	0.0019034	0.727273	0.00053349	0.00548467	Mouse Phenotype	FOOT
MP:0009111	pancreas hypoplasia	0.00365005	14.7827	33	2.23234	0.00814815	2.9295e-05	0.00040071	16	3.5814	13	3.62986	0.00309303	0.8125	9.7442e-07	2.2723e-05	Mouse Phenotype	FOOT
MP:0002235	abnormal external nares morphology	0.00182696	7.39918	21	2.83815	0.00518519	3.1275e-05	0.00042535	9	2.01454	7	3.47474	0.00166548	0.777778	0.00065387	0.00637923	Mouse Phenotype	FOOT
MP:0013442	abnormal Harderian gland size	0.0022739	9.20928	24	2.60607	0.00592593	3.4057e-05	0.00045862	8	1.7907	6	3.35064	0.00142755	0.75	0.00229751	0.0177867	Mouse Phenotype	FOOT
MP:0005248	abnormal Harderian gland morphology	0.00434895	17.6133	37	2.10069	0.0091358	3.5563e-05	0.00047689	19	4.25292	10	2.35133	0.00237925	0.526316	0.00382685	0.0262284	Mouse Phenotype	FOOT
MP:0000828	abnormal fourth ventricle morphology	0.00419276	16.9807	36	2.12005	0.00888889	3.7447e-05	0.00049796	29	6.49129	13	2.00268	0.00309303	0.448276	0.00602923	0.037071	Mouse Phenotype	FOOT
MP:0003793	abnormal submandibular gland morphology	0.00488246	19.774	40	2.02286	0.00987654	3.9852e-05	0.00052628	28	6.26745	13	2.07421	0.00309303	0.464286	0.00417011	0.0276878	Mouse Phenotype	FOOT
MP:0000566	synostosis	0.00323791	13.1135	30	2.28772	0.00740741	4.2666e-05	0.00056111	15	3.35757	8	2.38268	0.0019034	0.533333	0.00870541	0.0490179	Mouse Phenotype	FOOT
MP:0004141	abnormal enteroendocrine cell morphology	0.00230906	9.35169	24	2.56638	0.00592593	4.3074e-05	0.0005657	20	4.47675	10	2.23376	0.00237925	0.5	0.00613268	0.0374184	Mouse Phenotype	FOOT
MP:0004268	abnormal optic stalk morphology	0.00441086	17.864	37	2.0712	0.0091358	4.7288e-05	0.00061346	29	6.49129	13	2.00268	0.00309303	0.448276	0.00602923	0.037071	Mouse Phenotype	FOOT
MP:0004083	polysyndactyly	0.00265278	10.7438	26	2.42001	0.00641975	5.5029e-05	0.00070151	20	4.47675	10	2.23376	0.00237925	0.5	0.00613268	0.0374184	Mouse Phenotype	FOOT
MP:0000441	increased cranium width	0.00205338	8.31619	22	2.64544	0.0054321	5.7e-05	0.0007247	14	3.13373	9	2.87198	0.00214133	0.642857	0.00091878	0.0084385	Mouse Phenotype	FOOT
MP:0011386	increased metanephric mesenchyme apoptosis	0.00480402	19.4563	39	2.00449	0.00962963	5.9505e-05	0.00075355	20	4.47675	12	2.68051	0.0028551	0.6	0.0003141	0.00351652	Mouse Phenotype	FOOT
MP:0010098	abnormal retinal blood vessel pattern	0.00221409	8.96707	23	2.56494	0.00567901	6.1877e-05	0.00077945	12	2.68605	8	2.97835	0.0019034	0.666667	0.00128554	0.011194	Mouse Phenotype	FOOT
MP:0004872	absent nasal septum	0.00209432	8.48199	22	2.59373	0.0054321	7.5394e-05	0.00092653	12	2.68605	8	2.97835	0.0019034	0.666667	0.00128554	0.011194	Mouse Phenotype	FOOT
MP:0005324	ascites	0.00453579	18.3699	37	2.01416	0.0091358	8.223e-05	0.00099771	45	10.0727	18	1.78701	0.00428266	0.4	0.00592354	0.0365387	Mouse Phenotype	FOOT
MP:0001699	increased embryo size	0.00182398	7.38711	20	2.70742	0.00493827	8.9137e-05	0.00107335	9	2.01454	6	2.97835	0.00142755	0.666667	0.0055848	0.035083	Mouse Phenotype	FOOT
MP:0008039	increased NK T cell number	0.00421926	17.088	35	2.04822	0.00864198	9.1784e-05	0.00110244	36	8.05816	15	1.86147	0.00356888	0.416667	0.00747755	0.0445438	Mouse Phenotype	FOOT
MP:0011376	abnormal kidney corticomedullary boundary morphology	0.00227694	9.2216	23	2.49414	0.00567901	9.2865e-05	0.00111264	13	2.90989	9	3.0929	0.00214133	0.692308	0.00040966	0.00442069	Mouse Phenotype	FOOT
MP:0009917	abnormal hyoid bone body morphology	0.00197815	8.0115	21	2.62123	0.00518519	9.3907e-05	0.00112371	9	2.01454	8	3.97113	0.0019034	0.888889	4.5214e-05	0.00067022	Mouse Phenotype	FOOT
MP:0010897	abnormal bronchiole epithelium morphology	0.00406037	16.4445	34	2.06756	0.00839506	9.6302e-05	0.00114949	32	7.16281	15	2.09415	0.00356888	0.46875	0.00189498	0.0151996	Mouse Phenotype	FOOT
MP:0004372	bowed fibula	0.00228874	9.2694	23	2.48128	0.00567901	0.00010003	0.00118948	9	2.01454	7	3.47474	0.00166548	0.777778	0.00065387	0.00637923	Mouse Phenotype	FOOT
MP:0004338	small clavicle	0.00276742	11.208	26	2.31976	0.00641975	0.00010693	0.00126063	15	3.35757	9	2.68051	0.00214133	0.6	0.0018412	0.0148932	Mouse Phenotype	FOOT
MP:0008098	decreased plasma cell number	0.00410823	16.6383	34	2.04347	0.00839506	0.00011941	0.0013839	31	6.93897	15	2.1617	0.00356888	0.483871	0.00126649	0.01115	Mouse Phenotype	FOOT
MP:0003703	abnormal vestibulocochlear ganglion morphology	0.00412262	16.6966	34	2.03634	0.00839506	0.00012728	0.00145738	19	4.25292	14	3.29186	0.00333095	0.736842	2.8261e-06	5.8108e-05	Mouse Phenotype	FOOT
MP:0005204	abnormal canal of Schlemm morphology	0.00280537	11.3618	26	2.28838	0.00641975	0.00013193	0.00150162	14	3.13373	10	3.19109	0.00237925	0.714286	0.00012681	0.00160586	Mouse Phenotype	FOOT
MP:0003789	increased osteosarcoma incidence	0.00346643	14.0391	30	2.13689	0.00740741	0.00013793	0.00156068	29	6.49129	15	2.31079	0.00356888	0.517241	0.0005179	0.00538807	Mouse Phenotype	FOOT
MP:0011025	abnormal branching involved in trachea morphogenesis	0.00147752	5.98394	17	2.84094	0.00419753	0.00016718	0.00183741	4	0.895351	4	4.46752	0.0009517	1	0.00250756	0.0189076	Mouse Phenotype	FOOT
MP:0003668	abnormal periodontal ligament morphology	0.00106769	4.32413	14	3.23765	0.00345679	0.00016719	0.00183741	7	1.56686	5	3.19109	0.00118963	0.714286	0.00780898	0.0449769	Mouse Phenotype	FOOT
MP:0008730	fused phalanges	0.00318839	12.913	28	2.16836	0.00691358	0.00017878	0.00192273	23	5.14827	12	2.33088	0.0028551	0.521739	0.00170686	0.0142527	Mouse Phenotype	FOOT
MP:0006322	abnormal perichondrium morphology	0.00193078	7.81967	20	2.55765	0.00493827	0.00018625	0.0019941	10	2.23838	7	3.12727	0.00166548	0.7	0.00175655	0.0145029	Mouse Phenotype	FOOT
MP:0013166	small forelimb buds	0.0014987	6.06975	17	2.80077	0.00419753	0.00019681	0.00208384	7	1.56686	6	3.82931	0.00142755	0.857143	0.00070973	0.00680616	Mouse Phenotype	FOOT
MP:0000124	absent teeth	0.00271963	11.0145	25	2.26974	0.00617284	0.00019786	0.00209266	18	4.02908	12	2.97835	0.0028551	0.666667	7.3048e-05	0.00099916	Mouse Phenotype	FOOT
MP:0010906	abnormal lung bud morphology	0.00256411	10.3847	24	2.3111	0.00592593	0.00020265	0.00213383	9	2.01454	6	2.97835	0.00142755	0.666667	0.0055848	0.035083	Mouse Phenotype	FOOT
MP:0002268	abnormal terminal bronchiole morphology	0.00209936	8.5024	21	2.46989	0.00518519	0.00020747	0.00217266	14	3.13373	9	2.87198	0.00214133	0.642857	0.00091878	0.0084385	Mouse Phenotype	FOOT
MP:0006343	enlarged first pharyngeal arch	0.00150672	6.10222	17	2.78587	0.00419753	0.00020916	0.00218792	4	0.895351	4	4.46752	0.0009517	1	0.00250756	0.0189076	Mouse Phenotype	FOOT
MP:0003722	absent ureter	0.00322132	13.0463	28	2.1462	0.00691358	0.00021031	0.0021952	26	5.81978	14	2.40559	0.00333095	0.538462	0.00046587	0.00491629	Mouse Phenotype	FOOT
MP:0005480	increased circulating triiodothyronine level	0.00195472	7.91662	20	2.52633	0.00493827	0.00021783	0.00226149	13	2.90989	8	2.74925	0.0019034	0.615385	0.00268695	0.0199686	Mouse Phenotype	FOOT
MP:0009520	decreased submandibular gland size	0.00166834	6.75676	18	2.664	0.00444444	0.00023608	0.0024271	7	1.56686	5	3.19109	0.00118963	0.714286	0.00780898	0.0449769	Mouse Phenotype	FOOT
MP:0012300	abnormal umbilical cord blood vessel morphology	0.00292433	11.8436	26	2.19529	0.00641975	0.00024734	0.00252649	21	4.70059	12	2.55287	0.0028551	0.571429	0.00058383	0.00586966	Mouse Phenotype	FOOT
MP:0004670	small vertebral body	0.00260334	10.5435	24	2.27628	0.00592593	0.00025153	0.00256113	17	3.80524	9	2.36516	0.00214133	0.529412	0.00575932	0.0359406	Mouse Phenotype	FOOT
MP:0011031	abnormal branching involved in terminal bronchiole morphogenesis	0.00182781	7.40261	19	2.56666	0.00469136	0.00025459	0.00258678	11	2.46221	7	2.84297	0.00166548	0.636364	0.0038969	0.0263309	Mouse Phenotype	FOOT
MP:0008380	abnormal gonial bone morphology	0.00213399	8.64267	21	2.4298	0.00518519	0.00025683	0.00259849	15	3.35757	8	2.38268	0.0019034	0.533333	0.00870541	0.0490179	Mouse Phenotype	FOOT
MP:0003842	abnormal metopic suture morphology	0.0015422	6.24593	17	2.72177	0.00419753	0.00027226	0.00273723	7	1.56686	6	3.82931	0.00142755	0.857143	0.00070973	0.00680616	Mouse Phenotype	FOOT
MP:0012535	abnormal optic fissure closure	0.00262458	10.6295	24	2.25786	0.00592593	0.00028212	0.00282442	13	2.90989	8	2.74925	0.0019034	0.615385	0.00268695	0.0199686	Mouse Phenotype	FOOT
MP:0004418	small parietal bone	0.00365499	14.8027	30	2.02665	0.00740741	0.00032939	0.0032334	19	4.25292	10	2.35133	0.00237925	0.526316	0.00382685	0.0262284	Mouse Phenotype	FOOT
MP:0008173	increased follicular B cell number	0.00332329	13.4593	28	2.08034	0.00691358	0.00034163	0.00333976	32	7.16281	16	2.23376	0.00380681	0.5	0.0005542	0.00566101	Mouse Phenotype	FOOT
MP:0011365	small metanephros	0.00102033	4.13235	13	3.14591	0.00320988	0.00036737	0.00354437	7	1.56686	5	3.19109	0.00118963	0.714286	0.00780898	0.0449769	Mouse Phenotype	FOOT
MP:0006226	iris hypoplasia	0.00267722	10.8427	24	2.21346	0.00592593	0.00037246	0.00357901	13	2.90989	9	3.0929	0.00214133	0.692308	0.00040966	0.00442069	Mouse Phenotype	FOOT
MP:0004366	abnormal strial marginal cell morphology	0.00130238	5.27465	15	2.84379	0.0037037	0.00038827	0.00370702	9	2.01454	7	3.47474	0.00166548	0.777778	0.00065387	0.00637923	Mouse Phenotype	FOOT
MP:0006133	calcified artery	0.0017475	7.07735	18	2.54332	0.00444444	0.0004048	0.00379445	15	3.35757	9	2.68051	0.00214133	0.6	0.0018412	0.0148932	Mouse Phenotype	FOOT
MP:0004377	small frontal bone	0.00319923	12.9569	27	2.08383	0.00666667	0.00042001	0.00392547	15	3.35757	9	2.68051	0.00214133	0.6	0.0018412	0.0148932	Mouse Phenotype	FOOT
MP:0006402	small molars	0.00304389	12.3277	26	2.10906	0.00641975	0.00044572	0.00411741	13	2.90989	10	3.43656	0.00237925	0.769231	4.5391e-05	0.00067077	Mouse Phenotype	FOOT
MP:0003270	intestinal obstruction	0.00338326	13.7022	28	2.04347	0.00691358	0.0004489	0.00414277	21	4.70059	12	2.55287	0.0028551	0.571429	0.00058383	0.00586966	Mouse Phenotype	FOOT
MP:0013785	abnormal mammary gland bud morphology	0.0017669	7.15594	18	2.51539	0.00444444	0.00045938	0.00422727	6	1.34303	5	3.72294	0.00118963	0.833333	0.00273809	0.0199686	Mouse Phenotype	FOOT
MP:0009783	abnormal melanoblast morphology	0.00271902	11.012	24	2.17944	0.00592593	0.00046136	0.00423734	11	2.46221	7	2.84297	0.00166548	0.636364	0.0038969	0.0263309	Mouse Phenotype	FOOT
MP:0000090	absent premaxilla	0.00305193	12.3603	26	2.10351	0.00641975	0.00046305	0.00424468	13	2.90989	9	3.0929	0.00214133	0.692308	0.00040966	0.00442069	Mouse Phenotype	FOOT
MP:0005430	absent fibula	0.00322873	13.0763	27	2.0648	0.00666667	0.00048119	0.00437743	14	3.13373	11	3.5102	0.00261718	0.785714	1.2824e-05	0.00022212	Mouse Phenotype	FOOT
MP:0010980	ectopic ureteric bud	0.0024077	9.75117	22	2.25614	0.0054321	0.00049757	0.00447952	12	2.68605	7	2.60606	0.00166548	0.583333	0.0075528	0.0445743	Mouse Phenotype	FOOT
MP:0009179	abnormal pancreatic alpha cell differentiation	0.00148526	6.01532	16	2.65988	0.00395062	0.00051684	0.00461826	7	1.56686	5	3.19109	0.00118963	0.714286	0.00780898	0.0449769	Mouse Phenotype	FOOT
MP:0006031	abnormal pharyngeal pouch morphology	0.00257862	10.4434	23	2.20235	0.00567901	0.00052034	0.00464514	20	4.47675	10	2.23376	0.00237925	0.5	0.00613268	0.0374184	Mouse Phenotype	FOOT
MP:0013576	small forestomach	0.00080921	3.2773	11	3.35643	0.00271605	0.00059927	0.00527592	4	0.895351	4	4.46752	0.0009517	1	0.00250756	0.0189076	Mouse Phenotype	FOOT
MP:0004539	absent maxilla	0.00344932	13.9698	28	2.00433	0.00691358	0.00060044	0.00528132	13	2.90989	9	3.0929	0.00214133	0.692308	0.00040966	0.00442069	Mouse Phenotype	FOOT
MP:0002258	abnormal cricoid cartilage morphology	0.00295973	11.9869	25	2.08561	0.00617284	0.00066168	0.00575118	17	3.80524	10	2.62796	0.00237925	0.588235	0.00125744	0.0110806	Mouse Phenotype	FOOT
MP:0004912	absent mandibular coronoid process	0.00230761	9.34581	21	2.247	0.00518519	0.00069191	0.00597051	12	2.68605	9	3.35064	0.00214133	0.75	0.00015747	0.00192532	Mouse Phenotype	FOOT
MP:0030123	small middle ear ossicles	0.00231085	9.35893	21	2.24385	0.00518519	0.00070399	0.00605813	14	3.13373	10	3.19109	0.00237925	0.714286	0.00012681	0.00160586	Mouse Phenotype	FOOT
MP:0008374	abnormal malleus manubrium morphology	0.00215244	8.71739	20	2.29427	0.00493827	0.00071361	0.00610815	9	2.01454	7	3.47474	0.00166548	0.777778	0.00065387	0.00637923	Mouse Phenotype	FOOT
MP:0011457	abnormal metanephric ureteric bud development	0.00124132	5.02735	14	2.78477	0.00345679	0.0007281	0.0061989	5	1.11919	5	4.46752	0.00118963	1	0.00056087	0.00569753	Mouse Phenotype	FOOT
MP:0004360	absent ulna	0.0023178	9.38708	21	2.23712	0.00518519	0.00073055	0.00620868	11	2.46221	7	2.84297	0.00166548	0.636364	0.0038969	0.0263309	Mouse Phenotype	FOOT
MP:0000394	absent hair follicle melanin granules	0.00249531	10.106	22	2.17692	0.0054321	0.00078605	0.00658666	9	2.01454	7	3.47474	0.00166548	0.777778	0.00065387	0.00637923	Mouse Phenotype	FOOT
MP:0013743	ciliary body hypoplasia	0.00140633	5.69562	15	2.63361	0.0037037	0.00083748	0.00696882	6	1.34303	5	3.72294	0.00118963	0.833333	0.00273809	0.0199686	Mouse Phenotype	FOOT
MP:0011960	abnormal eye anterior chamber depth	0.00112876	4.57147	13	2.84373	0.00320988	0.00091892	0.00751568	7	1.56686	5	3.19109	0.00118963	0.714286	0.00780898	0.0449769	Mouse Phenotype	FOOT
MP:0005203	abnormal trabecular meshwork morphology	0.00287012	11.624	24	2.0647	0.00592593	0.00095593	0.00776518	15	3.35757	10	2.97835	0.00237925	0.666667	0.00030384	0.00342567	Mouse Phenotype	FOOT
MP:0011575	dilated aorta bulb	0.00099402	4.02577	12	2.98079	0.00296296	0.000959	0.00778353	4	0.895351	4	4.46752	0.0009517	1	0.00250756	0.0189076	Mouse Phenotype	FOOT
MP:0005171	absent coat pigmentation	0.00271585	10.9992	23	2.09106	0.00567901	0.0010234	0.00818806	15	3.35757	8	2.38268	0.0019034	0.533333	0.00870541	0.0490179	Mouse Phenotype	FOOT
MP:0003200	calcified joint	0.00100306	4.06239	12	2.95392	0.00296296	0.00103461	0.00826391	6	1.34303	5	3.72294	0.00118963	0.833333	0.00273809	0.0199686	Mouse Phenotype	FOOT
MP:0013977	symmetric azygos veins	0.0011481	4.64981	13	2.79581	0.00320988	0.00106806	0.00848147	9	2.01454	6	2.97835	0.00142755	0.666667	0.0055848	0.035083	Mouse Phenotype	FOOT
MP:0010987	abnormal nephrogenic mesenchyme morphogenesis	0.00175881	7.12317	17	2.38658	0.00419753	0.00113815	0.00892686	7	1.56686	5	3.19109	0.00118963	0.714286	0.00780898	0.0449769	Mouse Phenotype	FOOT
MP:0006429	abnormal hyaline cartilage morphology	0.00292516	11.8469	24	2.02585	0.00592593	0.00122594	0.00949084	24	5.3721	12	2.23376	0.0028551	0.5	0.00272364	0.0199686	Mouse Phenotype	FOOT
MP:0003874	absent pharyngeal arches	0.00147099	5.95751	15	2.51783	0.0037037	0.0012959	0.00995185	12	2.68605	8	2.97835	0.0019034	0.666667	0.00128554	0.011194	Mouse Phenotype	FOOT
MP:0000378	absent hair follicles	0.00293897	11.9028	24	2.01633	0.00592593	0.00130319	0.0099918	15	3.35757	9	2.68051	0.00214133	0.6	0.0018412	0.0148932	Mouse Phenotype	FOOT
MP:0010587	conotruncal ridge hypoplasia	0.00244959	9.92082	21	2.11676	0.00518519	0.00142505	0.0107963	11	2.46221	7	2.84297	0.00166548	0.636364	0.0038969	0.0263309	Mouse Phenotype	FOOT
MP:0006303	abnormal retinal nerve fiber layer morphology	0.00230797	9.34727	20	2.13966	0.00493827	0.00161173	0.0120389	18	4.02908	10	2.48196	0.00237925	0.555556	0.00226389	0.0177709	Mouse Phenotype	FOOT
MP:0004226	absent Schlemm's canal	0.00182318	7.38387	17	2.30231	0.00419753	0.00165263	0.0122773	9	2.01454	6	2.97835	0.00142755	0.666667	0.0055848	0.035083	Mouse Phenotype	FOOT
MP:0008372	small malleus	0.00216713	8.77686	19	2.16478	0.00469136	0.00182587	0.0133566	12	2.68605	8	2.97835	0.0019034	0.666667	0.00128554	0.011194	Mouse Phenotype	FOOT
MP:0006425	absent Mullerian ducts	0.0009394	3.80459	11	2.89125	0.00271605	0.00193538	0.0140396	6	1.34303	5	3.72294	0.00118963	0.833333	0.00273809	0.0199686	Mouse Phenotype	FOOT
MP:0001679	thin apical ectodermal ridge	0.00138894	5.62519	14	2.48881	0.00345679	0.00204552	0.0147158	6	1.34303	5	3.72294	0.00118963	0.833333	0.00273809	0.0199686	Mouse Phenotype	FOOT
MP:0005243	hemothorax	0.00154739	6.26694	15	2.39351	0.0037037	0.00209252	0.0150087	11	2.46221	7	2.84297	0.00166548	0.636364	0.0038969	0.0263309	Mouse Phenotype	FOOT
MP:0004913	absent mandibular angle	0.00205049	8.30449	18	2.1675	0.00444444	0.00233585	0.0164698	7	1.56686	6	3.82931	0.00142755	0.857143	0.00070973	0.00680616	Mouse Phenotype	FOOT
MP:0009524	absent submandibular gland	0.00207648	8.40974	18	2.14038	0.00444444	0.00266154	0.0183847	7	1.56686	5	3.19109	0.00118963	0.714286	0.00780898	0.0449769	Mouse Phenotype	FOOT
MP:0011486	ectopic ureter	0.00175997	7.12787	16	2.24471	0.00395062	0.00283561	0.0193652	7	1.56686	5	3.19109	0.00118963	0.714286	0.00780898	0.0449769	Mouse Phenotype	FOOT
MP:0002946	delayed axon extension	0.00114081	4.62028	12	2.59725	0.00296296	0.00294534	0.0199436	7	1.56686	5	3.19109	0.00118963	0.714286	0.00780898	0.0449769	Mouse Phenotype	FOOT
MP:0009545	abnormal dermis papillary layer morphology	0.0016091	6.51686	15	2.30172	0.0037037	0.00300094	0.0201914	7	1.56686	5	3.19109	0.00118963	0.714286	0.00780898	0.0449769	Mouse Phenotype	FOOT
MP:0001721	absent visceral yolk sac blood islands	0.00179007	7.24977	16	2.20697	0.00395062	0.00333016	0.0218022	15	3.35757	8	2.38268	0.0019034	0.533333	0.00870541	0.0490179	Mouse Phenotype	FOOT
MP:0010642	absent third pharyngeal arch	0.00117607	4.7631	12	2.51937	0.00296296	0.00373772	0.0238879	9	2.01454	7	3.47474	0.00166548	0.777778	0.00065387	0.00637923	Mouse Phenotype	FOOT
MP:0004790	absent upper incisors	0.00133911	5.42339	13	2.39703	0.00320988	0.00394603	0.0250019	8	1.7907	6	3.35064	0.00142755	0.75	0.00229751	0.0177867	Mouse Phenotype	FOOT
MP:0002898	absent cartilage	0.00234214	9.48567	19	2.00302	0.00469136	0.00417267	0.0261883	6	1.34303	5	3.72294	0.00118963	0.833333	0.00273809	0.0199686	Mouse Phenotype	FOOT
MP:0006400	decreased molar number	0.00151658	6.14213	14	2.27934	0.00345679	0.00439946	0.0272961	9	2.01454	6	2.97835	0.00142755	0.666667	0.0055848	0.035083	Mouse Phenotype	FOOT
MP:0000430	absent maxillary shelf	0.00201346	8.15451	17	2.08474	0.00419753	0.0044299	0.0274315	14	3.13373	10	3.19109	0.00237925	0.714286	0.00012681	0.00160586	Mouse Phenotype	FOOT
MP:0011488	abnormal ureterovesical junction morphology	0.00168461	6.82265	15	2.19856	0.0037037	0.0045303	0.0279627	6	1.34303	5	3.72294	0.00118963	0.833333	0.00273809	0.0199686	Mouse Phenotype	FOOT
MP:0003246	loss of GABAergic neurons	0.00152683	6.18367	14	2.26403	0.00345679	0.00465788	0.0286748	12	2.68605	7	2.60606	0.00166548	0.583333	0.0075528	0.0445743	Mouse Phenotype	FOOT
MP:0009957	abnormal cerebellum vermis lobule morphology	0.00219917	8.90665	18	2.02096	0.00444444	0.00475414	0.0291001	9	2.01454	6	2.97835	0.00142755	0.666667	0.0055848	0.035083	Mouse Phenotype	FOOT
MP:0010695	abnormal blood pressure regulation	0.00121615	4.92542	12	2.43634	0.00296296	0.00483757	0.0294974	11	2.46221	7	2.84297	0.00166548	0.636364	0.0038969	0.0263309	Mouse Phenotype	FOOT
MP:0010452	retina microaneurysm	0.00121766	4.9315	12	2.43333	0.00296296	0.00488332	0.0296441	6	1.34303	5	3.72294	0.00118963	0.833333	0.00273809	0.0199686	Mouse Phenotype	FOOT
MP:0009897	decreased maxillary shelf size	0.00188184	7.62146	16	2.09933	0.00395062	0.00529362	0.0314167	9	2.01454	8	3.97113	0.0019034	0.888889	4.5214e-05	0.00067022	Mouse Phenotype	FOOT
MP:0010784	abnormal forestomach morphology	0.00172297	6.97802	15	2.14961	0.0037037	0.00552109	0.0325244	8	1.7907	6	3.35064	0.00142755	0.75	0.00229751	0.0177867	Mouse Phenotype	FOOT
MP:0011366	absent metanephros	0.001418	5.74289	13	2.26367	0.00320988	0.00624441	0.0360306	12	2.68605	7	2.60606	0.00166548	0.583333	0.0075528	0.0445743	Mouse Phenotype	FOOT
MP:0004456	small pterygoid bone	0.00110431	4.47243	11	2.45951	0.00271605	0.0063554	0.0365828	5	1.11919	5	4.46752	0.00118963	1	0.00056087	0.00569753	Mouse Phenotype	FOOT
MP:0012251	abnormal diaphragm development	0.00175199	7.09556	15	2.114	0.0037037	0.00638113	0.0366867	12	2.68605	7	2.60606	0.00166548	0.583333	0.0075528	0.0445743	Mouse Phenotype	FOOT
MP:0000128	growth retardation of molars	0.00176	7.12798	15	2.10438	0.0037037	0.00663644	0.0377684	9	2.01454	6	2.97835	0.00142755	0.666667	0.0055848	0.035083	Mouse Phenotype	FOOT
MP:0005186	increased circulating progesterone level	0.00096246	3.89798	10	2.56543	0.00246914	0.00683758	0.0385688	17	3.80524	9	2.36516	0.00214133	0.529412	0.00575932	0.0359406	Mouse Phenotype	FOOT
MP:0011387	absent metanephric mesenchyme	0.00143598	5.8157	13	2.23533	0.00320988	0.00689367	0.0387252	6	1.34303	6	4.46752	0.00142755	1	0.00012543	0.00160586	Mouse Phenotype	FOOT
MP:0010939	abnormal mandibular prominence morphology	0.0016135	6.53467	14	2.14242	0.00345679	0.00736695	0.0407376	7	1.56686	5	3.19109	0.00118963	0.714286	0.00780898	0.0449769	Mouse Phenotype	FOOT
MP:0006098	absent cerebellar lobules	0.00113763	4.6074	11	2.38747	0.00271605	0.00782747	0.042716	7	1.56686	5	3.19109	0.00118963	0.714286	0.00780898	0.0449769	Mouse Phenotype	FOOT
MP:0009181	decreased pancreatic delta cell number	0.00180786	7.32185	15	2.04866	0.0037037	0.00833855	0.0449915	9	2.01454	6	2.97835	0.00142755	0.666667	0.0055848	0.035083	Mouse Phenotype	FOOT

## Sheet: Autopod-specific Sets TFs
FeatureID	SampleID	motif.id	motif.name	motif.percentGC	negLog10Padj	log2enr	comparison	type
MA0105.4	HAND	MA0105.4	NFKB1	66.4587	7.16677	1.00225	HAND_vs_FOOT	limb
MA0796.1	HAND	MA0796.1	TGIF1	49.1154	4.00149	0.943297	HAND_vs_FOOT	limb
MA0470.2	HAND	MA0470.2	E2F4	52.6545	6.63101	0.90716	HAND_vs_FOOT	limb
MA0727.1	HAND	MA0727.1	NR3C2	47.0764	4.52819	0.847717	HAND_vs_FOOT	limb
MA1509.1	HAND	MA1509.1	IRF6	46.2147	7.45123	0.807691	HAND_vs_FOOT	limb
MA1573.1	HAND	MA1573.1	THAP11	48.6327	8.81973	0.779046	HAND_vs_FOOT	limb
MA1584.1	HAND	MA1584.1	ZIC5	75.1427	10.4535	0.741068	HAND_vs_FOOT	limb
MA0783.1	HAND	MA0783.1	PKNOX2	49.4515	4.29656	0.684592	HAND_vs_FOOT	limb
MA0797.1	HAND	MA0797.1	TGIF2	48.855	9.39106	0.680945	HAND_vs_FOOT	limb
MA1538.1	HAND	MA1538.1	NR2F1(var.3)	53.893	7.05017	0.679505	HAND_vs_FOOT	limb
MA0696.1	HAND	MA0696.1	ZIC1	76.6328	10.8695	0.673559	HAND_vs_FOOT	limb
MA0028.2	HAND	MA0028.2	ELK1	58.0875	8.78381	0.67319	HAND_vs_FOOT	limb
MA1527.1	FOOT	MA1527.1	NFIC(var.2)	60.5499	6.53662	0.635904	HAND_vs_FOOT	limb
MA0778.1	HAND	MA0778.1	NFKB2	67.0837	12.892	0.630215	HAND_vs_FOOT	limb
MA0844.1	HAND	MA0844.1	XBP1	52.689	5.37062	0.612903	HAND_vs_FOOT	limb
MA1575.1	HAND	MA1575.1	THRB(var.2)	54.1555	6.35806	0.584518	HAND_vs_FOOT	limb
MA1493.1	HAND	MA1493.1	HES6	62.132	9.99131	0.575438	HAND_vs_FOOT	limb
MA0685.1	HAND	MA0685.1	SP4	66.368	7.10122	0.569305	HAND_vs_FOOT	limb
MA1553.1	HAND	MA1553.1	RARG(var.3)	50.5095	7.05017	0.551509	HAND_vs_FOOT	limb
MA0464.2	HAND	MA0464.2	BHLHE40	60.8122	7.45796	0.548915	HAND_vs_FOOT	limb
MA0828.1	HAND	MA0828.1	SREBF2(var.2)	49.4405	7.52343	0.540831	HAND_vs_FOOT	limb
MA1600.1	HAND	MA1600.1	ZNF684	54.4734	6.67483	0.540313	HAND_vs_FOOT	limb
MA0864.2	HAND	MA0864.2	E2F2	53.4987	4.50957	0.529812	HAND_vs_FOOT	limb
MA1485.1	HAND	MA1485.1	FERD3L	59.3455	6.67135	0.526507	HAND_vs_FOOT	limb
MA1484.1	HAND	MA1484.1	ETS2	59.1278	10.3902	0.522129	HAND_vs_FOOT	limb
MA1531.1	HAND	MA1531.1	NR1D1	54.7667	4.95976	0.511849	HAND_vs_FOOT	limb
MA0066.1	HAND	MA0066.1	PPARG	52.1872	7.17471	0.511464	HAND_vs_FOOT	limb
MA0748.2	HAND	MA0748.2	YY2	67.2542	10.8625	0.505577	HAND_vs_FOOT	limb
MA0697.1	HAND	MA0697.1	ZIC3	75.848	9.21136	0.486047	HAND_vs_FOOT	limb
MA0131.2	HAND	MA0131.2	HINFP	72.6503	8.60999	0.485301	HAND_vs_FOOT	limb
MA1537.1	HAND	MA1537.1	NR2F1(var.2)	50.8141	4.90259	0.484957	HAND_vs_FOOT	limb
MA0773.1	HAND	MA0773.1	MEF2D	22.5126	9.34856	0.479143	HAND_vs_FOOT	limb
MA1552.1	HAND	MA1552.1	RARB(var.3)	53.5714	5.7457	0.479095	HAND_vs_FOOT	limb
MA0660.1	HAND	MA0660.1	MEF2B	25.4008	9.27183	0.468789	HAND_vs_FOOT	limb
MA0694.1	HAND	MA0694.1	ZBTB7B	65.1695	11.4199	0.467558	HAND_vs_FOOT	limb
MA1643.1	FOOT	MA1643.1	NFIB	59.0379	7.80416	0.465014	HAND_vs_FOOT	limb
MA1541.1	HAND	MA1541.1	NR6A1	46.5548	10.4271	0.454265	HAND_vs_FOOT	limb
MA0641.1	HAND	MA0641.1	ELF4	55.0847	4.41091	0.450754	HAND_vs_FOOT	limb
MA0664.1	HAND	MA0664.1	MLXIPL	51.3211	5.84563	0.450447	HAND_vs_FOOT	limb
MA1146.1	HAND	MA1146.1	NR1H4::RXRA	52.3422	8.32042	0.446671	HAND_vs_FOOT	limb
MA1505.1	FOOT	MA1505.1	HOXC8	27.5032	7.75565	0.441946	HAND_vs_FOOT	limb
MA1556.1	HAND	MA1556.1	RXRG(var.2)	59.2593	4.09408	0.438251	HAND_vs_FOOT	limb
MA0074.1	HAND	MA0074.1	RXRA::VDR	52.4949	4.92984	0.436198	HAND_vs_FOOT	limb
MA0759.1	HAND	MA0759.1	ELK3	55.646	6.60059	0.431057	HAND_vs_FOOT	limb
MA1147.1	HAND	MA1147.1	NR4A2::RXRA	56.7255	6.86867	0.429312	HAND_vs_FOOT	limb
MA0119.1	FOOT	MA0119.1	NFIC::TLX1	59.3931	7.24646	0.428954	HAND_vs_FOOT	limb
MA1495.1	FOOT	MA1495.1	HOXA1	28.9708	9.47793	0.427936	HAND_vs_FOOT	limb
MA1583.1	HAND	MA1583.1	ZFP57	62.8235	4.13599	0.42528	HAND_vs_FOOT	limb
MA1533.1	HAND	MA1533.1	NR1I2	53.0185	7.30511	0.424407	HAND_vs_FOOT	limb
MA0642.1	FOOT	MA0642.1	EN2	38.634	10.8123	0.423005	HAND_vs_FOOT	limb
MA1571.1	HAND	MA1571.1	TGIF2LX	51.5718	6.12923	0.422517	HAND_vs_FOOT	limb
MA0632.2	HAND	MA0632.2	TCFL5	75.3313	5.83995	0.422124	HAND_vs_FOOT	limb
MA0616.2	HAND	MA0616.2	HES2	72.6348	7.1624	0.419359	HAND_vs_FOOT	limb
MA1572.1	HAND	MA1572.1	TGIF2LY	51.147	6.83271	0.415672	HAND_vs_FOOT	limb
MA0903.1	FOOT	MA0903.1	HOXB3	30.5102	15.38	0.414629	HAND_vs_FOOT	limb
MA0734.2	HAND	MA0734.2	GLI2	66.9607	6.80288	0.412095	HAND_vs_FOOT	limb
MA0141.3	HAND	MA0141.3	ESRRB	42.2899	4.98349	0.411484	HAND_vs_FOOT	limb
MA0904.2	FOOT	MA0904.2	HOXB5	29.4043	11.3909	0.40553	HAND_vs_FOOT	limb
MA1560.1	HAND	MA1560.1	SOHLH2	65.412	5.43832	0.403812	HAND_vs_FOOT	limb
MA0726.1	FOOT	MA0726.1	VSX2	20.6633	13.6332	0.395494	HAND_vs_FOOT	limb
MA1464.1	HAND	MA1464.1	ARNT2	60.4675	5.37247	0.393275	HAND_vs_FOOT	limb
MA1529.1	HAND	MA1529.1	NHLH2	68.0045	5.7695	0.390434	HAND_vs_FOOT	limb
MA1528.1	FOOT	MA1528.1	NFIX(var.2)	61.7365	6.15775	0.388744	HAND_vs_FOOT	limb
MA0703.2	FOOT	MA0703.2	LMX1B	12.0849	11.1071	0.388181	HAND_vs_FOOT	limb
MA0675.1	FOOT	MA0675.1	NKX6-2	22.6752	15.2578	0.386944	HAND_vs_FOOT	limb
MA0139.1	HAND	MA0139.1	CTCF	64.8605	12.327	0.386651	HAND_vs_FOOT	limb
MA1555.1	HAND	MA1555.1	RXRB(var.2)	58.1514	4.45155	0.386279	HAND_vs_FOOT	limb
MA0662.1	FOOT	MA0662.1	MIXL1	28.8776	12.585	0.386228	HAND_vs_FOOT	limb
MA0886.1	FOOT	MA0886.1	EMX2	29.2089	14.9912	0.386101	HAND_vs_FOOT	limb
MA0634.1	FOOT	MA0634.1	ALX3	27.0961	14.841	0.385042	HAND_vs_FOOT	limb
MA0650.2	FOOT	MA0650.2	HOXA13	34.3173	11.9386	0.382446	HAND_vs_FOOT	limb
MA0892.1	FOOT	MA0892.1	GSX1	30.683	6.18309	0.381417	HAND_vs_FOOT	limb
MA0701.2	FOOT	MA0701.2	LHX9	22.2503	13.8985	0.381158	HAND_vs_FOOT	limb
MA0722.1	FOOT	MA0722.1	VAX1	23.8217	11.8106	0.379161	HAND_vs_FOOT	limb
MA0725.1	FOOT	MA0725.1	VSX1	21.4013	11.8106	0.379161	HAND_vs_FOOT	limb
MA0893.2	FOOT	MA0893.2	GSX2	31.385	16.0163	0.378903	HAND_vs_FOOT	limb
MA0823.1	HAND	MA0823.1	HEY1	68.8708	5.72579	0.377677	HAND_vs_FOOT	limb
MA0760.1	HAND	MA0760.1	ERF	54.3235	5.36842	0.375814	HAND_vs_FOOT	limb
MA1574.1	HAND	MA1574.1	THRB	52.0353	7.59196	0.374732	HAND_vs_FOOT	limb
MA1497.1	FOOT	MA1497.1	HOXA6	34.7208	6.09457	0.372134	HAND_vs_FOOT	limb
MA1487.1	HAND	MA1487.1	FOXE1	29.4396	5.93852	0.369755	HAND_vs_FOOT	limb
MA0474.2	HAND	MA0474.2	ERG	54.0102	7.43807	0.369696	HAND_vs_FOOT	limb
MA0876.1	FOOT	MA0876.1	BSX	31.0038	12.3781	0.365837	HAND_vs_FOOT	limb
MA0902.2	FOOT	MA0902.2	HOXB2	29.9873	13.9487	0.365133	HAND_vs_FOOT	limb
MA0158.2	FOOT	MA0158.2	HOXA5	32.0659	12.4653	0.362981	HAND_vs_FOOT	limb
MA0912.2	FOOT	MA0912.2	HOXD3	25.4753	12.4936	0.362974	HAND_vs_FOOT	limb
MA0763.1	HAND	MA0763.1	ETV3	54.527	5.03712	0.3624	HAND_vs_FOOT	limb
MA0723.1	FOOT	MA0723.1	VAX2	25.54	12.8153	0.362164	HAND_vs_FOOT	limb
MA0699.1	FOOT	MA0699.1	LBX2	32.7551	9.63099	0.361286	HAND_vs_FOOT	limb
MA0156.2	HAND	MA0156.2	FEV	54.2218	5.25996	0.360036	HAND_vs_FOOT	limb
MA0014.3	HAND	MA0014.3	PAX5	64.5408	8.81973	0.359712	HAND_vs_FOOT	limb
MA0027.2	FOOT	MA0027.2	EN1	25	16.0163	0.358214	HAND_vs_FOOT	limb
MA1474.1	HAND	MA1474.1	CREB3L4	60.2716	5.85518	0.356889	HAND_vs_FOOT	limb
MA0721.1	FOOT	MA0721.1	UNCX	22.9008	11.2839	0.356684	HAND_vs_FOOT	limb
MA1463.1	FOOT	MA1463.1	ARGFX	20	13.0658	0.356588	HAND_vs_FOOT	limb
MA0661.1	FOOT	MA0661.1	MEOX1	32.0082	12.4653	0.356054	HAND_vs_FOOT	limb
MA0644.1	FOOT	MA0644.1	ESX1	30.0102	10.1016	0.355419	HAND_vs_FOOT	limb
MA0079.4	HAND	MA0079.4	SP1	69.5122	4.55266	0.354634	HAND_vs_FOOT	limb
MA0098.3	HAND	MA0098.3	ETS1	54.6748	6.96098	0.353819	HAND_vs_FOOT	limb
MA0914.1	FOOT	MA0914.1	ISL2	35.0765	10.7864	0.353491	HAND_vs_FOOT	limb
MA0888.1	FOOT	MA0888.1	EVX2	34.0793	7.01784	0.349426	HAND_vs_FOOT	limb
MA0829.2	HAND	MA0829.2	SREBF1(var.2)	46.7836	7.20108	0.348602	HAND_vs_FOOT	limb
MA1566.1	HAND	MA1566.1	TBX3	57.1138	11.0468	0.348519	HAND_vs_FOOT	limb
MA0887.1	FOOT	MA0887.1	EVX1	34.3177	6.19778	0.343678	HAND_vs_FOOT	limb
MA0159.1	HAND	MA0159.1	RARA::RXRA	53.4411	9.11277	0.342881	HAND_vs_FOOT	limb
MA0612.2	FOOT	MA0612.2	EMX1	23.1646	12.9081	0.342709	HAND_vs_FOOT	limb
MA1500.1	FOOT	MA1500.1	HOXB6	31.0433	10.0836	0.341793	HAND_vs_FOOT	limb
MA0708.1	FOOT	MA0708.1	MSX2	26.3024	16.6137	0.339719	HAND_vs_FOOT	limb
MA0667.1	HAND	MA0667.1	MYF6	40.3455	4.87747	0.339688	HAND_vs_FOOT	limb
MA1532.1	HAND	MA1532.1	NR1D2	50.1355	7.73407	0.339179	HAND_vs_FOOT	limb
MA0630.1	FOOT	MA0630.1	SHOX	22.293	8.03316	0.338211	HAND_vs_FOOT	limb
MA0132.2	FOOT	MA0132.2	PDX1	23.6041	22.3323	0.336483	HAND_vs_FOOT	limb
MA0910.2	FOOT	MA0910.2	HOXD8	31.519	11.503	0.335334	HAND_vs_FOOT	limb
MA0875.1	FOOT	MA0875.1	BARX1	29.9873	11.5095	0.332193	HAND_vs_FOOT	limb
MA0889.1	FOOT	MA0889.1	GBX1	31.8737	11.7237	0.331108	HAND_vs_FOOT	limb
MA0900.2	FOOT	MA0900.2	HOXA2	22.6582	16.562	0.330981	HAND_vs_FOOT	limb
MA0815.1	HAND	MA0815.1	TFAP2C(var.3)	76.6224	6.902	0.330389	HAND_vs_FOOT	limb
MA1496.1	FOOT	MA1496.1	HOXA4	32.6996	10.0836	0.326594	HAND_vs_FOOT	limb
MA1501.1	FOOT	MA1501.1	HOXB7	35.4315	9.28094	0.322543	HAND_vs_FOOT	limb
MA0646.1	HAND	MA0646.1	GCM1	62.037	5.02632	0.322426	HAND_vs_FOOT	limb
MA0890.1	FOOT	MA0890.1	GBX2	29.4898	15.8628	0.322157	HAND_vs_FOOT	limb
MA0665.1	HAND	MA0665.1	MSC	46.1851	7.14586	0.319296	HAND_vs_FOOT	limb
MA0717.1	FOOT	MA0717.1	RAX2	24.6173	8.59113	0.316569	HAND_vs_FOOT	limb
MA0706.1	FOOT	MA0706.1	MEOX2	30.9184	7.54564	0.316561	HAND_vs_FOOT	limb
MA0825.1	HAND	MA0825.1	MNT	60.1015	4.90983	0.316094	HAND_vs_FOOT	limb
MA0651.1	FOOT	MA0651.1	HOXC11	33.4566	5.70803	0.314985	HAND_vs_FOOT	limb
MA1651.1	HAND	MA1651.1	ZFP42	52.8412	5.88861	0.31498	HAND_vs_FOOT	limb
MA1498.1	FOOT	MA1498.1	HOXA7	31.8528	10.285	0.314568	HAND_vs_FOOT	limb
MA1587.1	HAND	MA1587.1	ZNF135	64.1867	12.1435	0.314377	HAND_vs_FOOT	limb
MA1519.1	FOOT	MA1519.1	LHX5	19.8986	16.322	0.312752	HAND_vs_FOOT	limb
MA0894.1	FOOT	MA0894.1	HESX1	27.0876	16.4165	0.312699	HAND_vs_FOOT	limb
MA1099.2	HAND	MA1099.2	HES1	73.7854	4.90863	0.312001	HAND_vs_FOOT	limb
MA0658.1	FOOT	MA0658.1	LHX6	27.5407	7.19286	0.31084	HAND_vs_FOOT	limb
MA0695.1	HAND	MA0695.1	ZBTB7C	64.7359	9.03909	0.307937	HAND_vs_FOOT	limb
MA0095.2	HAND	MA0095.2	YY1	52.6718	9.11277	0.305971	HAND_vs_FOOT	limb
MA0702.2	FOOT	MA0702.2	LMX1A	11.0127	9.28094	0.305243	HAND_vs_FOOT	limb
MA0075.3	FOOT	MA0075.3	PRRX2	19.4162	13.8985	0.302331	HAND_vs_FOOT	limb
MA0259.1	HAND	MA0259.1	ARNT::HIF1A	65.8196	5.9891	0.301691	HAND_vs_FOOT	limb
MA1502.1	FOOT	MA1502.1	HOXB8	30.2149	11.4276	0.300804	HAND_vs_FOOT	limb
MA0628.1	FOOT	MA0628.1	POU6F1	20.5703	6.64667	0.299287	HAND_vs_FOOT	limb
MA0690.1	HAND	MA0690.1	TBX21	42.9009	7.46021	0.298808	HAND_vs_FOOT	limb
MA0740.1	HAND	MA0740.1	KLF14	68.7727	4.81555	0.297925	HAND_vs_FOOT	limb
MA0666.1	FOOT	MA0666.1	MSX1	28.535	13.0338	0.296053	HAND_vs_FOOT	limb
MA0700.2	FOOT	MA0700.2	LHX2	28.0037	12.585	0.295504	HAND_vs_FOOT	limb
MA1106.1	HAND	MA1106.1	HIF1A	61.9675	4.32237	0.295038	HAND_vs_FOOT	limb
MA1585.1	HAND	MA1585.1	ZKSCAN1	46.4975	4.56159	0.293173	HAND_vs_FOOT	limb
MA0707.1	FOOT	MA0707.1	MNX1	23.4756	14.841	0.286545	HAND_vs_FOOT	limb
MA0716.1	FOOT	MA0716.1	PRRX1	21.2005	13.5584	0.28462	HAND_vs_FOOT	limb
MA1577.1	FOOT	MA1577.1	TLX2	20.7858	12.4653	0.283794	HAND_vs_FOOT	limb
MA0872.1	HAND	MA0872.1	TFAP2A(var.3)	76.5442	5.91591	0.282796	HAND_vs_FOOT	limb
MA1503.1	FOOT	MA1503.1	HOXB9	31.2373	4.48103	0.282569	HAND_vs_FOOT	limb
MA1473.1	FOOT	MA1473.1	CDX4	31.7972	9.15052	0.281916	HAND_vs_FOOT	limb
MA0654.1	FOOT	MA0654.1	ISX	19.8986	15.0781	0.280668	HAND_vs_FOOT	limb
MA0724.1	FOOT	MA0724.1	VENTX	31.6027	6.33311	0.278001	HAND_vs_FOOT	limb
MA0765.2	HAND	MA0765.2	ETV5	59.1837	6.5217	0.274803	HAND_vs_FOOT	limb
MA1507.1	FOOT	MA1507.1	HOXD4	23.9544	15.38	0.273667	HAND_vs_FOOT	limb
MA0744.2	HAND	MA0744.2	SCRT2	49.5541	5.8067	0.273035	HAND_vs_FOOT	limb
MA0793.1	FOOT	MA0793.1	POU6F2	28.5132	8.62475	0.27063	HAND_vs_FOOT	limb
MA0076.2	HAND	MA0076.2	ELK4	63.0996	6.33078	0.26804	HAND_vs_FOOT	limb
MA0071.1	HAND	MA0071.1	RORA	42.5051	6.57128	0.264769	HAND_vs_FOOT	limb
MA0743.2	HAND	MA0743.2	SCRT1	48.5022	4.71632	0.26451	HAND_vs_FOOT	limb
MA0718.1	FOOT	MA0718.1	RAX	25.4842	10.8797	0.264024	HAND_vs_FOOT	limb
MA0504.1	HAND	MA0504.1	NR2C2	58.9952	6.40207	0.263919	HAND_vs_FOOT	limb
MA1491.1	HAND	MA1491.1	GLI3	66.9377	4.57024	0.263582	HAND_vs_FOOT	limb
MA1549.1	FOOT	MA1549.1	POU6F1(var.2)	32.5534	7.60206	0.261542	HAND_vs_FOOT	limb
MA1481.1	FOOT	MA1481.1	DRGX	22.8717	11.3974	0.257485	HAND_vs_FOOT	limb
MA1513.1	HAND	MA1513.1	KLF15	90.4982	4.56159	0.257134	HAND_vs_FOOT	limb
MA0618.1	FOOT	MA0618.1	LBX1	23.731	9.46552	0.256063	HAND_vs_FOOT	limb
MA0802.1	HAND	MA0802.1	TBR1	42.5662	6.24045	0.2525	HAND_vs_FOOT	limb
MA0163.1	HAND	MA0163.1	PLAG1	78.7988	5.50965	0.248068	HAND_vs_FOOT	limb
MA1468.1	FOOT	MA1468.1	ATOH7	44.9644	5.33142	0.245305	HAND_vs_FOOT	limb
MA0597.1	HAND	MA0597.1	THAP1	60.7223	4.21424	0.24387	HAND_vs_FOOT	limb
MA0905.1	FOOT	MA0905.1	HOXC10	28.3249	7.14009	0.24338	HAND_vs_FOOT	limb
MA0807.1	HAND	MA0807.1	TBX5	52.6048	7.41542	0.243254	HAND_vs_FOOT	limb
MA0878.2	FOOT	MA0878.2	CDX1	34.8666	5.11105	0.242248	HAND_vs_FOOT	limb
MA0710.1	FOOT	MA0710.1	NOTO	28.8325	9.1642	0.241846	HAND_vs_FOOT	limb
MA0913.2	FOOT	MA0913.2	HOXD9	25.1521	11.9386	0.241292	HAND_vs_FOOT	limb
MA1149.1	HAND	MA1149.1	RARA::RXRG	55.2036	5.26982	0.240684	HAND_vs_FOOT	limb
MA0674.1	FOOT	MA0674.1	NKX6-1	19.797	9.8005	0.239704	HAND_vs_FOOT	limb
MA0882.1	FOOT	MA0882.1	DLX6	23.2143	11.34	0.239694	HAND_vs_FOOT	limb
MA0908.1	FOOT	MA0908.1	HOXD11	28.1377	6.18309	0.238311	HAND_vs_FOOT	limb
MA0068.2	FOOT	MA0068.2	PAX4	24.7776	4.48103	0.23515	HAND_vs_FOOT	limb
MA0751.1	HAND	MA0751.1	ZIC4	72.3014	4.51152	0.233517	HAND_vs_FOOT	limb
MA0073.1	HAND	MA0073.1	RREB1	61.676	7.06166	0.230978	HAND_vs_FOOT	limb
MA0782.2	HAND	MA0782.2	PKNOX1	49.0476	5.43832	0.229513	HAND_vs_FOOT	limb
MA0645.1	HAND	MA0645.1	ETV6	57.5788	4.48856	0.228143	HAND_vs_FOOT	limb
MA0899.1	FOOT	MA0899.1	HOXA10	26.4624	12.6987	0.225302	HAND_vs_FOOT	limb
MA0498.2	HAND	MA0498.2	MEIS1	45.1379	4.21424	0.224507	HAND_vs_FOOT	limb
MA0750.2	HAND	MA0750.2	ZBTB7A	65.2038	5.37247	0.22445	HAND_vs_FOOT	limb
MA1499.1	FOOT	MA1499.1	HOXB4	22.9404	9.99307	0.224314	HAND_vs_FOOT	limb
MA0805.1	HAND	MA0805.1	TBX1	48.9848	5.98427	0.220875	HAND_vs_FOOT	limb
MA1567.1	HAND	MA1567.1	TBX6	51.3706	6.22713	0.219951	HAND_vs_FOOT	limb
MA0592.3	HAND	MA0592.3	ESRRA	49.2549	5.07801	0.219948	HAND_vs_FOOT	limb
MA1103.2	HAND	MA1103.2	FOXK2	32.4699	4.87747	0.218389	HAND_vs_FOOT	limb
MA0047.3	HAND	MA0047.3	FOXA2	29.5097	4.68522	0.217568	HAND_vs_FOOT	limb
MA1504.1	FOOT	MA1504.1	HOXC4	25.1899	10.5751	0.214653	HAND_vs_FOOT	limb
MA1476.1	FOOT	MA1476.1	DLX5	22.5888	11.3588	0.21291	HAND_vs_FOOT	limb
MA1111.1	HAND	MA1111.1	NR2F2	43.3488	4.61877	0.212702	HAND_vs_FOOT	limb
MA1523.1	HAND	MA1523.1	MSANTD3	51.222	4.93278	0.211213	HAND_vs_FOOT	limb
MA0042.2	HAND	MA0042.2	FOXI1	26.3081	7.05017	0.20991	HAND_vs_FOOT	limb
MA0848.1	HAND	MA0848.1	FOXO4	26.6376	7.05017	0.20991	HAND_vs_FOOT	limb
MA0803.1	HAND	MA0803.1	TBX15	50.7024	6.49865	0.209855	HAND_vs_FOOT	limb
MA1534.1	HAND	MA1534.1	NR1I3	33.6712	4.01981	0.208777	HAND_vs_FOOT	limb
MA0693.2	HAND	MA0693.2	VDR	41.8367	6.35956	0.208059	HAND_vs_FOOT	limb
MA1596.1	HAND	MA1596.1	ZNF460	74.5223	6.35962	0.206854	HAND_vs_FOOT	limb
MA0849.1	HAND	MA0849.1	FOXO6	27.7457	5.32377	0.204589	HAND_vs_FOOT	limb
MA0852.2	HAND	MA0852.2	FOXK1	38.5569	4.28313	0.203378	HAND_vs_FOOT	limb
MA0258.2	HAND	MA0258.2	ESR2	58.2597	4.97553	0.201895	HAND_vs_FOOT	limb
MA0812.1	HAND	MA0812.1	TFAP2B(var.2)	73.1054	4.05161	0.199062	HAND_vs_FOOT	limb
MA0806.1	HAND	MA0806.1	TBX4	49.6823	6.27726	0.198727	HAND_vs_FOOT	limb
MA0100.3	HAND	MA0100.3	MYB	50.1526	5.22441	0.197788	HAND_vs_FOOT	limb
MA0847.2	HAND	MA0847.2	FOXD2	27.1306	4.44576	0.196488	HAND_vs_FOOT	limb
MA0522.3	HAND	MA0522.3	TCF3	66.7285	4.58348	0.195104	HAND_vs_FOOT	limb
MA0481.3	HAND	MA0481.3	FOXP1	30.2412	4.3504	0.194896	HAND_vs_FOOT	limb
MA1648.1	HAND	MA1648.1	TCF12(var.2)	66.3889	4.52819	0.194826	HAND_vs_FOOT	limb
MA1565.1	HAND	MA1565.1	TBX18	50.5932	6.63657	0.194634	HAND_vs_FOOT	limb
MA0745.2	HAND	MA0745.2	SNAI2	56.4465	5.74403	0.194603	HAND_vs_FOOT	limb
MA1559.1	HAND	MA1559.1	SNAI3	56.8528	5.63223	0.191664	HAND_vs_FOOT	limb
MA0688.1	HAND	MA0688.1	TBX2	43.9408	4.6932	0.191536	HAND_vs_FOOT	limb
MA0136.2	HAND	MA0136.2	ELF5	51.105	5.12982	0.185087	HAND_vs_FOOT	limb
MA0801.1	HAND	MA0801.1	MGA	51.465	5.26982	0.183503	HAND_vs_FOOT	limb
MA1109.1	HAND	MA1109.1	NEUROD1	54.1601	4.93278	0.179569	HAND_vs_FOOT	limb
MA1530.1	FOOT	MA1530.1	NKX6-3	29.4582	4.73116	0.174371	HAND_vs_FOOT	limb
MA0497.1	HAND	MA0497.1	MEF2C	27.7665	5.64244	0.172665	HAND_vs_FOOT	limb
MA0901.2	FOOT	MA0901.2	HOXB13	23.0825	9.11277	0.169069	HAND_vs_FOOT	limb
MA0670.1	FOOT	MA0670.1	NFIA	49.3401	6.67483	0.165918	HAND_vs_FOOT	limb
MA0062.3	HAND	MA0062.3	GABPA	50.4727	6.00691	0.165826	HAND_vs_FOOT	limb
MA0846.1	HAND	MA0846.1	FOXC2	22.7504	5.38356	0.162838	HAND_vs_FOOT	limb
MA0017.2	HAND	MA0017.2	NR2F1	53.3958	4.05922	0.158742	HAND_vs_FOOT	limb
MA0465.2	FOOT	MA0465.2	CDX2	28.887	5.70613	0.157351	HAND_vs_FOOT	limb
MA0081.2	HAND	MA0081.2	SPIB	46.1292	4.10505	0.152392	HAND_vs_FOOT	limb
MA0598.3	HAND	MA0598.3	EHF	47.9266	4.659	0.147111	HAND_vs_FOOT	limb
MA0781.1	SHARED	MA0781.1	PAX9	57.3643	7.46128	1.37251	SHARED_vs_FOOT	limb
MA0821.1	SHARED	MA0821.1	HES5	70.3046	11.0124	1.13055	SHARED_vs_FOOT	limb
MA0779.1	SHARED	MA0779.1	PAX1	56.5632	7.89984	1.04872	SHARED_vs_FOOT	limb
MA0822.1	SHARED	MA0822.1	HES7	72.827	15.3368	1.02085	SHARED_vs_FOOT	limb
MA1573.1	SHARED	MA1573.1	THAP11	48.6327	18.3056	1.0055	SHARED_vs_FOOT	limb
MA0636.1	SHARED	MA0636.1	BHLHE41	58.8235	9.60709	0.980161	SHARED_vs_FOOT	limb
MA0796.1	SHARED	MA0796.1	TGIF1	49.1154	5.20836	0.934518	SHARED_vs_FOOT	limb
MA0657.1	SHARED	MA0657.1	KLF13	57.6749	9.37826	0.926402	SHARED_vs_FOOT	limb
MA0732.1	SHARED	MA0732.1	EGR3	69.5799	15.0949	0.915408	SHARED_vs_FOOT	limb
MA1654.1	SHARED	MA1654.1	ZNF16	54.1223	15.8884	0.905872	SHARED_vs_FOOT	limb
MA0105.4	SHARED	MA0105.4	NFKB1	66.4587	6.65516	0.904486	SHARED_vs_FOOT	limb
MA0470.2	SHARED	MA0470.2	E2F4	52.6545	8.84166	0.898207	SHARED_vs_FOOT	limb
MA0727.1	SHARED	MA0727.1	NR3C2	47.0764	6.18188	0.897419	SHARED_vs_FOOT	limb
MA0828.1	SHARED	MA0828.1	SREBF2(var.2)	49.4405	28.7728	0.894704	SHARED_vs_FOOT	limb
MA0797.1	SHARED	MA0797.1	TGIF2	48.855	21.3213	0.882046	SHARED_vs_FOOT	limb
MA1575.1	SHARED	MA1575.1	THRB(var.2)	54.1555	16.7644	0.878375	SHARED_vs_FOOT	limb
MA0115.1	SHARED	MA0115.1	NR1H2::RXRA	44.4982	7.16735	0.871368	SHARED_vs_FOOT	limb
MA0464.2	SHARED	MA0464.2	BHLHE40	60.8122	22.4964	0.867721	SHARED_vs_FOOT	limb
MA0777.1	SHARED	MA0777.1	MYBL2	47.7906	6.338	0.862986	SHARED_vs_FOOT	limb
MA0778.1	SHARED	MA0778.1	NFKB2	67.0837	29.8688	0.860357	SHARED_vs_FOOT	limb
MA1539.1	SHARED	MA1539.1	NR2F6(var.3)	53.144	6.71768	0.848297	SHARED_vs_FOOT	limb
MA1509.1	SHARED	MA1509.1	IRF6	46.2147	12.4719	0.848092	SHARED_vs_FOOT	limb
MA0783.1	SHARED	MA0783.1	PKNOX2	49.4515	8.75373	0.845164	SHARED_vs_FOOT	limb
MA1538.1	SHARED	MA1538.1	NR2F1(var.3)	53.893	13.3095	0.838706	SHARED_vs_FOOT	limb
MA1531.1	SHARED	MA1531.1	NR1D1	54.7667	15.1983	0.833858	SHARED_vs_FOOT	limb
MA0773.1	SHARED	MA0773.1	MEF2D	22.5126	48.9	0.833085	SHARED_vs_FOOT	limb
MA0632.2	SHARED	MA0632.2	TCFL5	75.3313	24.8506	0.831427	SHARED_vs_FOOT	limb
MA1493.1	SHARED	MA1493.1	HES6	62.132	26.9152	0.818496	SHARED_vs_FOOT	limb
MA1533.1	SHARED	MA1533.1	NR1I2	53.0185	33.5482	0.817864	SHARED_vs_FOOT	limb
MA0696.1	SHARED	MA0696.1	ZIC1	76.6328	17.4663	0.81786	SHARED_vs_FOOT	limb
MA1600.1	SHARED	MA1600.1	ZNF684	54.4734	18.2655	0.813389	SHARED_vs_FOOT	limb
MA0131.2	SHARED	MA0131.2	HINFP	72.6503	25.8996	0.812059	SHARED_vs_FOOT	limb
MA0660.1	SHARED	MA0660.1	MEF2B	25.4008	47.3913	0.810706	SHARED_vs_FOOT	limb
MA0794.1	SHARED	MA0794.1	PROX1	46.2384	10.7184	0.809692	SHARED_vs_FOOT	limb
MA0112.3	SHARED	MA0112.3	ESR1	56.3506	4.05639	0.808087	SHARED_vs_FOOT	limb
MA0685.1	SHARED	MA0685.1	SP4	66.368	15.5181	0.80667	SHARED_vs_FOOT	limb
MA0113.3	SHARED	MA0113.3	NR3C1	45.9379	5.05783	0.796743	SHARED_vs_FOOT	limb
MA0149.1	SHARED	MA0149.1	EWSR1-FLI1	55.4494	8.84166	0.794623	SHARED_vs_FOOT	limb
MA0028.2	SHARED	MA0028.2	ELK1	58.0875	13.5995	0.787423	SHARED_vs_FOOT	limb
MA0616.2	SHARED	MA0616.2	HES2	72.6348	29.2429	0.78339	SHARED_vs_FOOT	limb
MA1560.1	SHARED	MA1560.1	SOHLH2	65.412	23.7737	0.782039	SHARED_vs_FOOT	limb
MA0865.1	SHARED	MA0865.1	E2F8	50.5485	7.79483	0.774255	SHARED_vs_FOOT	limb
MA0472.2	SHARED	MA0472.2	EGR2	74.6753	18.3509	0.772561	SHARED_vs_FOOT	limb
MA1571.1	SHARED	MA1571.1	TGIF2LX	51.5718	26.38	0.754668	SHARED_vs_FOOT	limb
MA0664.1	SHARED	MA0664.1	MLXIPL	51.3211	19.9292	0.737841	SHARED_vs_FOOT	limb
MA1556.1	SHARED	MA1556.1	RXRG(var.2)	59.2593	13.0585	0.735925	SHARED_vs_FOOT	limb
MA1537.1	SHARED	MA1537.1	NR2F1(var.2)	50.8141	13.0086	0.735031	SHARED_vs_FOOT	limb
MA0506.1	SHARED	MA0506.1	NRF1	81.1408	19.8708	0.731622	SHARED_vs_FOOT	limb
MA1545.1	SHARED	MA1545.1	OVOL2	46.4481	8.14216	0.731521	SHARED_vs_FOOT	limb
MA1584.1	SHARED	MA1584.1	ZIC5	75.1427	10.8793	0.730827	SHARED_vs_FOOT	limb
MA1154.1	SHARED	MA1154.1	ZNF282	50.8677	9.46377	0.727483	SHARED_vs_FOOT	limb
MA1484.1	SHARED	MA1484.1	ETS2	59.1278	26.1982	0.726241	SHARED_vs_FOOT	limb
MA0829.2	SHARED	MA0829.2	SREBF1(var.2)	46.7836	45.6736	0.726041	SHARED_vs_FOOT	limb
MA0734.2	SHARED	MA0734.2	GLI2	66.9607	22.4567	0.725701	SHARED_vs_FOOT	limb
MA0871.2	SHARED	MA0871.2	TFEC	60.8133	19.3187	0.724946	SHARED_vs_FOOT	limb
MA1553.1	SHARED	MA1553.1	RARG(var.3)	50.5095	15.8117	0.724665	SHARED_vs_FOOT	limb
MA0141.3	SHARED	MA0141.3	ESRRB	42.2899	20.5253	0.719285	SHARED_vs_FOOT	limb
MA0823.1	SHARED	MA0823.1	HEY1	68.8708	24.021	0.718818	SHARED_vs_FOOT	limb
MA0066.1	SHARED	MA0066.1	PPARG	52.1872	16.5174	0.715362	SHARED_vs_FOOT	limb
MA0138.2	SHARED	MA0138.2	REST	59.7472	13.3848	0.715323	SHARED_vs_FOOT	limb
MA0861.1	SHARED	MA0861.1	TP73	48.953	12.7443	0.712339	SHARED_vs_FOOT	limb
MA1485.1	SHARED	MA1485.1	FERD3L	59.3455	14.6574	0.709004	SHARED_vs_FOOT	limb
MA1418.1	SHARED	MA1418.1	IRF3	45.8111	7.36499	0.707822	SHARED_vs_FOOT	limb
MA1552.1	SHARED	MA1552.1	RARB(var.3)	53.5714	15.4357	0.704188	SHARED_vs_FOOT	limb
MA0637.1	SHARED	MA0637.1	CENPB	56.7641	12.3742	0.701432	SHARED_vs_FOOT	limb
MA1589.1	SHARED	MA1589.1	ZNF140	50.3887	10.7239	0.700305	SHARED_vs_FOOT	limb
MA1557.1	SHARED	MA1557.1	SMAD5	50.3067	10.8087	0.699676	SHARED_vs_FOOT	limb
MA1464.1	SHARED	MA1464.1	ARNT2	60.4675	19.9222	0.699651	SHARED_vs_FOOT	limb
MA1147.1	SHARED	MA1147.1	NR4A2::RXRA	56.7255	22.1783	0.699041	SHARED_vs_FOOT	limb
MA0074.1	SHARED	MA0074.1	RXRA::VDR	52.4949	16.7475	0.69806	SHARED_vs_FOOT	limb
MA0641.1	SHARED	MA0641.1	ELF4	55.0847	12.7478	0.696974	SHARED_vs_FOOT	limb
MA0877.2	SHARED	MA0877.2	BARHL1	36.5019	7.53848	0.692235	SHARED_vs_FOOT	limb
MA0748.2	SHARED	MA0748.2	YY2	67.2542	21.1756	0.689979	SHARED_vs_FOOT	limb
MA1489.1	SHARED	MA1489.1	FOXN3	25	7.83356	0.689913	SHARED_vs_FOOT	limb
MA1155.1	SHARED	MA1155.1	ZSCAN4	47.6351	8.58239	0.686744	SHARED_vs_FOOT	limb
MA0863.1	SHARED	MA0863.1	MTF1	57.9942	8.18409	0.684083	SHARED_vs_FOOT	limb
MA0864.2	SHARED	MA0864.2	E2F2	53.4987	9.57795	0.683997	SHARED_vs_FOOT	limb
MA0697.1	SHARED	MA0697.1	ZIC3	75.848	19.5627	0.682842	SHARED_vs_FOOT	limb
MA0527.1	SHARED	MA0527.1	ZBTB33	61.1413	7.1952	0.679486	SHARED_vs_FOOT	limb
MA0795.1	SHARED	MA0795.1	SMAD3	46.9512	7.8539	0.675273	SHARED_vs_FOOT	limb
MA1483.1	SHARED	MA1483.1	ELF2	54.6531	12.7744	0.674628	SHARED_vs_FOOT	limb
MA0079.4	SHARED	MA0079.4	SP1	69.5122	17.5493	0.67004	SHARED_vs_FOOT	limb
MA1572.1	SHARED	MA1572.1	TGIF2LY	51.147	24.2417	0.669452	SHARED_vs_FOOT	limb
MA1420.1	SHARED	MA1420.1	IRF5	48.0671	17.917	0.668292	SHARED_vs_FOOT	limb
MA1518.1	SHARED	MA1518.1	LHX1	32.2293	4.86938	0.666004	SHARED_vs_FOOT	limb
MA1494.1	SHARED	MA1494.1	HNF4A(var.2)	50.5763	5.32175	0.661844	SHARED_vs_FOOT	limb
MA0844.1	SHARED	MA0844.1	XBP1	52.689	7.96279	0.661734	SHARED_vs_FOOT	limb
MA0475.2	SHARED	MA0475.2	FLI1	54.4625	19.6939	0.660351	SHARED_vs_FOOT	limb
MA1146.1	SHARED	MA1146.1	NR1H4::RXRA	52.3422	25.2441	0.660233	SHARED_vs_FOOT	limb
MA0772.1	SHARED	MA0772.1	IRF7	37.3004	25.8457	0.654364	SHARED_vs_FOOT	limb
MA1099.2	SHARED	MA1099.2	HES1	73.7854	23.5452	0.652875	SHARED_vs_FOOT	limb
MA1574.1	SHARED	MA1574.1	THRB	52.0353	28.4353	0.651624	SHARED_vs_FOOT	limb
MA0694.1	SHARED	MA0694.1	ZBTB7B	65.1695	25.6559	0.65008	SHARED_vs_FOOT	limb
MA0474.2	SHARED	MA0474.2	ERG	54.0102	32.2689	0.649395	SHARED_vs_FOOT	limb
MA1541.1	SHARED	MA1541.1	NR6A1	46.5548	29.2872	0.648164	SHARED_vs_FOOT	limb
MA0760.1	SHARED	MA0760.1	ERF	54.3235	21.0981	0.647199	SHARED_vs_FOOT	limb
MA1555.1	SHARED	MA1555.1	RXRB(var.2)	58.1514	14.8081	0.64594	SHARED_vs_FOOT	limb
MA1583.1	SHARED	MA1583.1	ZFP57	62.8235	10.4051	0.64519	SHARED_vs_FOOT	limb
MA0740.1	SHARED	MA0740.1	KLF14	68.7727	24.9741	0.64364	SHARED_vs_FOOT	limb
MA1532.1	SHARED	MA1532.1	NR1D2	50.1355	37.2161	0.640909	SHARED_vs_FOOT	limb
MA0819.1	SHARED	MA0819.1	CLOCK	51.9348	23.8471	0.639303	SHARED_vs_FOOT	limb
MA1106.1	SHARED	MA1106.1	HIF1A	61.9675	23.6732	0.638342	SHARED_vs_FOOT	limb
MA1602.1	SHARED	MA1602.1	ZSCAN29	56.9374	10.564	0.63589	SHARED_vs_FOOT	limb
MA0088.2	SHARED	MA0088.2	ZNF143	49.4617	4.74986	0.635691	SHARED_vs_FOOT	limb
MA1550.1	SHARED	MA1550.1	PPARD	48.6023	9.09635	0.634559	SHARED_vs_FOOT	limb
MA0825.1	SHARED	MA0825.1	MNT	60.1015	22.8254	0.631918	SHARED_vs_FOOT	limb
MA0156.2	SHARED	MA0156.2	FEV	54.2218	21.0334	0.628883	SHARED_vs_FOOT	limb
MA0759.1	SHARED	MA0759.1	ELK3	55.646	17.1183	0.627807	SHARED_vs_FOOT	limb
MA1487.1	SHARED	MA1487.1	FOXE1	29.4396	29.8688	0.627749	SHARED_vs_FOOT	limb
MA0667.1	SHARED	MA0667.1	MYF6	40.3455	24.5646	0.625804	SHARED_vs_FOOT	limb
MA0649.1	SHARED	MA0649.1	HEY2	67.5153	20.4845	0.62385	SHARED_vs_FOOT	limb
MA0486.2	SHARED	MA0486.2	HSF1	36.9616	11.3743	0.622288	SHARED_vs_FOOT	limb
MA1491.1	SHARED	MA1491.1	GLI3	66.9377	26.8093	0.621009	SHARED_vs_FOOT	limb
MA0737.1	SHARED	MA0737.1	GLIS3	68.2643	4.86688	0.619191	SHARED_vs_FOOT	limb
MA1529.1	SHARED	MA1529.1	NHLH2	68.0045	15.6768	0.618724	SHARED_vs_FOOT	limb
MA0763.1	SHARED	MA0763.1	ETV3	54.527	18.63	0.618206	SHARED_vs_FOOT	limb
MA0838.1	SHARED	MA0838.1	CEBPG	42.6829	9.02183	0.616929	SHARED_vs_FOOT	limb
MA1566.1	SHARED	MA1566.1	TBX3	57.1138	44.5902	0.616752	SHARED_vs_FOOT	limb
MA0736.1	SHARED	MA0736.1	GLIS2	75.4895	12.7443	0.610976	SHARED_vs_FOOT	limb
MA0743.2	SHARED	MA0743.2	SCRT1	48.5022	36.4833	0.610775	SHARED_vs_FOOT	limb
MA1585.1	SHARED	MA1585.1	ZKSCAN1	46.4975	26.2397	0.610342	SHARED_vs_FOOT	limb
MA1475.1	SHARED	MA1475.1	CREB3L4(var.2)	54.6383	10.6143	0.609537	SHARED_vs_FOOT	limb
MA0762.1	SHARED	MA0762.1	ETV2	46.7221	20.7411	0.609365	SHARED_vs_FOOT	limb
MA0098.3	SHARED	MA0098.3	ETS1	54.6748	27.4775	0.60383	SHARED_vs_FOOT	limb
MA0014.3	SHARED	MA0014.3	PAX5	64.5408	29.2705	0.603439	SHARED_vs_FOOT	limb
MA0744.2	SHARED	MA0744.2	SCRT2	49.5541	40.3101	0.603035	SHARED_vs_FOOT	limb
MA0757.1	SHARED	MA0757.1	ONECUT3	19.0407	22.9985	0.600257	SHARED_vs_FOOT	limb
MA0466.2	SHARED	MA0466.2	CEBPB	41.6497	12.6911	0.597964	SHARED_vs_FOOT	limb
MA0647.1	SHARED	MA0647.1	GRHL1	39.5586	17.2448	0.596429	SHARED_vs_FOOT	limb
MA0058.3	SHARED	MA0058.3	MAX	60.6707	20.7033	0.594014	SHARED_vs_FOOT	limb
MA0259.1	SHARED	MA0259.1	ARNT::HIF1A	65.8196	25.8688	0.590542	SHARED_vs_FOOT	limb
MA0646.1	SHARED	MA0646.1	GCM1	62.037	19.2271	0.586173	SHARED_vs_FOOT	limb
MA0009.2	SHARED	MA0009.2	TBXT	46.7218	4.7361	0.585972	SHARED_vs_FOOT	limb
MA0770.1	SHARED	MA0770.1	HSF2	36.072	15.7829	0.582463	SHARED_vs_FOOT	limb
MA0095.2	SHARED	MA0095.2	YY1	52.6718	49.3095	0.580269	SHARED_vs_FOOT	limb
MA1124.1	SHARED	MA1124.1	ZNF24	31.9466	27.5655	0.577522	SHARED_vs_FOOT	limb
MA1576.1	SHARED	MA1576.1	THRB(var.3)	51.1765	7.6847	0.57605	SHARED_vs_FOOT	limb
MA0620.3	SHARED	MA0620.3	MITF	47.5651	14.2511	0.575329	SHARED_vs_FOOT	limb
MA0663.1	SHARED	MA0663.1	MLX	49.3401	6.82767	0.57185	SHARED_vs_FOOT	limb
MA0733.1	SHARED	MA0733.1	EGR4	64.0944	23.9823	0.568027	SHARED_vs_FOOT	limb
MA0609.2	SHARED	MA0609.2	CREM	53.2402	13.1191	0.564686	SHARED_vs_FOOT	limb
MA1474.1	SHARED	MA1474.1	CREB3L4	60.2716	17.0675	0.56405	SHARED_vs_FOOT	limb
MA0463.2	SHARED	MA0463.2	BCL6	44.8759	15.5791	0.563857	SHARED_vs_FOOT	limb
MA1588.1	SHARED	MA1588.1	ZNF136	39.741	15.7233	0.563191	SHARED_vs_FOOT	limb
MA0815.1	SHARED	MA0815.1	TFAP2C(var.3)	76.6224	20.9492	0.563161	SHARED_vs_FOOT	limb
MA0766.2	SHARED	MA0766.2	GATA5	38.4381	31.7357	0.562768	SHARED_vs_FOOT	limb
MA0071.1	SHARED	MA0071.1	RORA	42.5051	44.8654	0.562558	SHARED_vs_FOOT	limb
MA0157.2	SHARED	MA0157.2	FOXO3	26.2357	28.3638	0.560862	SHARED_vs_FOOT	limb
MA0594.2	SHARED	MA0594.2	HOXA9	40.6728	5.88838	0.5606	SHARED_vs_FOOT	limb
MA1587.1	SHARED	MA1587.1	ZNF135	64.1867	49.4843	0.558775	SHARED_vs_FOOT	limb
MA0147.3	SHARED	MA0147.3	MYC	66.9499	23.6443	0.557624	SHARED_vs_FOOT	limb
MA0159.1	SHARED	MA0159.1	RARA::RXRA	53.4411	29.3723	0.557026	SHARED_vs_FOOT	limb
MA0031.1	SHARED	MA0031.1	FOXD1	27.5418	18.8041	0.556767	SHARED_vs_FOOT	limb
MA0756.1	SHARED	MA0756.1	ONECUT2	23.2169	17.0465	0.556621	SHARED_vs_FOOT	limb
MA0804.1	SHARED	MA0804.1	TBX19	43.0464	6.51879	0.553384	SHARED_vs_FOOT	limb
MA0638.1	SHARED	MA0638.1	CREB3	56.0816	6.15675	0.551438	SHARED_vs_FOOT	limb
MA0504.1	SHARED	MA0504.1	NR2C2	58.9952	31.2764	0.549155	SHARED_vs_FOOT	limb
MA0906.1	SHARED	MA0906.1	HOXC12	33.7937	17.2917	0.54893	SHARED_vs_FOOT	limb
MA0692.1	SHARED	MA0692.1	TFEB	55.499	26.3982	0.548677	SHARED_vs_FOOT	limb
MA0872.1	SHARED	MA0872.1	TFAP2A(var.3)	76.5442	23.0669	0.548134	SHARED_vs_FOOT	limb
MA0498.2	SHARED	MA0498.2	MEIS1	45.1379	35.9986	0.546748	SHARED_vs_FOOT	limb
MA0833.2	SHARED	MA0833.2	ATF4	35.9534	21.8728	0.546326	SHARED_vs_FOOT	limb
MA0072.1	SHARED	MA0072.1	RORA(var.2)	36.8805	13.0073	0.545312	SHARED_vs_FOOT	limb
MA0024.3	SHARED	MA0024.3	E2F1	58.1001	4.91984	0.543406	SHARED_vs_FOOT	limb
MA0059.1	SHARED	MA0059.1	MAX::MYC	60.0186	17.7596	0.543048	SHARED_vs_FOOT	limb
MA0839.1	SHARED	MA0839.1	CREB3L1	57.3401	5.84392	0.542415	SHARED_vs_FOOT	limb
MA0104.4	SHARED	MA0104.4	MYCN	68.4746	16.4405	0.539435	SHARED_vs_FOOT	limb
MA1580.1	SHARED	MA1580.1	ZBTB32	34.3813	18.5596	0.53851	SHARED_vs_FOOT	limb
MA1554.1	SHARED	MA1554.1	RFX7	53.0405	22.6735	0.537304	SHARED_vs_FOOT	limb
MA0093.3	SHARED	MA0093.3	USF1	51.0234	25.6258	0.536531	SHARED_vs_FOOT	limb
MA0765.2	SHARED	MA0765.2	ETV5	59.1837	30.8651	0.53389	SHARED_vs_FOOT	limb
MA0163.1	SHARED	MA0163.1	PLAG1	78.7988	26.7381	0.531747	SHARED_vs_FOOT	limb
MA0782.2	SHARED	MA0782.2	PKNOX1	49.0476	41.3632	0.531137	SHARED_vs_FOOT	limb
MA1536.1	SHARED	MA1536.1	NR2C2(var.2)	54.0609	29.881	0.529133	SHARED_vs_FOOT	limb
MA0837.1	SHARED	MA0837.1	CEBPE	40.9969	15.0073	0.52683	SHARED_vs_FOOT	limb
MA0754.1	SHARED	MA0754.1	CUX1	29.5617	15.0119	0.525711	SHARED_vs_FOOT	limb
MA1110.1	SHARED	MA1110.1	NR1H4	45.7909	26.6682	0.525567	SHARED_vs_FOOT	limb
MA1650.1	SHARED	MA1650.1	ZBTB14	81.3084	15.2388	0.523943	SHARED_vs_FOOT	limb
MA0690.1	SHARED	MA0690.1	TBX21	42.9009	33.7847	0.523595	SHARED_vs_FOOT	limb
MA1117.1	SHARED	MA1117.1	RELB	54.9074	23.1985	0.522922	SHARED_vs_FOOT	limb
MA0695.1	SHARED	MA0695.1	ZBTB7C	64.7359	29.8399	0.522155	SHARED_vs_FOOT	limb
MA0139.1	SHARED	MA0139.1	CTCF	64.8605	25.5729	0.521048	SHARED_vs_FOOT	limb
MA1506.1	SHARED	MA1506.1	HOXD10	34.5304	14.8028	0.520993	SHARED_vs_FOOT	limb
MA1149.1	SHARED	MA1149.1	RARA::RXRG	55.2036	28.2259	0.519035	SHARED_vs_FOOT	limb
MA1516.1	SHARED	MA1516.1	KLF3	77.634	28.2267	0.518633	SHARED_vs_FOOT	limb
MA0686.1	SHARED	MA0686.1	SPDEF	54.8476	7.55634	0.518167	SHARED_vs_FOOT	limb
MA0751.1	SHARED	MA0751.1	ZIC4	72.3014	22.7458	0.518151	SHARED_vs_FOOT	limb
MA0507.1	SHARED	MA0507.1	POU2F2	28.6943	34.8964	0.517402	SHARED_vs_FOOT	limb
MA1563.1	SHARED	MA1563.1	SOX18	54.9618	13.228	0.516664	SHARED_vs_FOOT	limb
MA1561.1	SHARED	MA1561.1	SOX12	44.0333	13.4177	0.516089	SHARED_vs_FOOT	limb
MA1592.1	SHARED	MA1592.1	ZNF274	48.8579	10.8625	0.515834	SHARED_vs_FOOT	limb
MA0043.3	SHARED	MA0043.3	HLF	33.8192	17.9921	0.5155	SHARED_vs_FOOT	limb
MA0711.1	SHARED	MA0711.1	OTX1	38.8041	46.546	0.515061	SHARED_vs_FOOT	limb
MA0807.1	SHARED	MA0807.1	TBX5	52.6048	43.4709	0.514453	SHARED_vs_FOOT	limb
MA0891.1	SHARED	MA0891.1	GSC2	39.8167	19.7852	0.514057	SHARED_vs_FOOT	limb
MA0526.3	SHARED	MA0526.3	USF2	51.4931	24.6734	0.51285	SHARED_vs_FOOT	limb
MA0051.1	SHARED	MA0051.1	IRF2	41.5959	16.2425	0.512445	SHARED_vs_FOOT	limb
MA0836.2	SHARED	MA0836.2	CEBPD	38.631	32.3123	0.511941	SHARED_vs_FOOT	limb
MA0862.1	SHARED	MA0862.1	GMEB2	41.0941	4.31968	0.511792	SHARED_vs_FOOT	limb
MA0030.1	SHARED	MA0030.1	FOXF2	34.2125	29.6402	0.510789	SHARED_vs_FOOT	limb
MA0831.2	SHARED	MA0831.2	TFE3	57.0701	29.214	0.510362	SHARED_vs_FOOT	limb
MA0501.1	SHARED	MA0501.1	MAF::NFE2	42.8765	14.6708	0.510126	SHARED_vs_FOOT	limb
MA0799.1	SHARED	MA0799.1	RFX4	49.1385	9.38785	0.510065	SHARED_vs_FOOT	limb
MA0645.1	SHARED	MA0645.1	ETV6	57.5788	28.1068	0.507892	SHARED_vs_FOOT	limb
MA1513.1	SHARED	MA1513.1	KLF15	90.4982	16.3912	0.505946	SHARED_vs_FOOT	limb
MA0597.1	SHARED	MA0597.1	THAP1	60.7223	19.2566	0.502647	SHARED_vs_FOOT	limb
MA1597.1	SHARED	MA1597.1	ZNF528	55.9159	8.23128	0.502416	SHARED_vs_FOOT	limb
MA1542.1	SHARED	MA1542.1	OSR1	53.6585	23.833	0.501951	SHARED_vs_FOOT	limb
MA1523.1	SHARED	MA1523.1	MSANTD3	51.222	36.0772	0.501949	SHARED_vs_FOOT	limb
MA0689.1	SHARED	MA0689.1	TBX20	43.0157	29.6435	0.501362	SHARED_vs_FOOT	limb
MA0595.1	SHARED	MA0595.1	SREBF1	57.0265	39.6128	0.50132	SHARED_vs_FOOT	limb
MA0610.1	SHARED	MA0610.1	DMRT3	34.1667	31.982	0.500535	SHARED_vs_FOOT	limb
MA0745.2	SHARED	MA0745.2	SNAI2	56.4465	46.7745	0.500235	SHARED_vs_FOOT	limb
MA0063.2	SHARED	MA0063.2	NKX2-5	43.7732	28.0458	0.499269	SHARED_vs_FOOT	limb
MA0802.1	SHARED	MA0802.1	TBR1	42.5662	37.1207	0.498926	SHARED_vs_FOOT	limb
MA1559.1	SHARED	MA1559.1	SNAI3	56.8528	47.0858	0.498529	SHARED_vs_FOOT	limb
MA0771.1	SHARED	MA0771.1	HSF4	41.7058	20.1785	0.497872	SHARED_vs_FOOT	limb
MA1122.1	SHARED	MA1122.1	TFDP1	71.0306	15.6505	0.497428	SHARED_vs_FOOT	limb
MA0803.1	SHARED	MA0803.1	TBX15	50.7024	47.3976	0.497416	SHARED_vs_FOOT	limb
MA0069.1	SHARED	MA0069.1	PAX6	43.2945	13.5753	0.496525	SHARED_vs_FOOT	limb
MA0613.1	SHARED	MA0613.1	FOXG1	22.3767	32.1631	0.496441	SHARED_vs_FOOT	limb
MA0714.1	SHARED	MA0714.1	PITX3	39.887	33.5482	0.495859	SHARED_vs_FOOT	limb
MA0665.1	SHARED	MA0665.1	MSC	46.1851	23.7372	0.494872	SHARED_vs_FOOT	limb
MA0038.2	SHARED	MA0038.2	GFI1	44.4068	20.3357	0.494657	SHARED_vs_FOOT	limb
MA0160.1	SHARED	MA0160.1	NR4A2	49.2366	45.6353	0.494604	SHARED_vs_FOOT	limb
MA0089.2	SHARED	MA0089.2	NFE2L1	44.232	12.7478	0.492877	SHARED_vs_FOOT	limb
MA0522.3	SHARED	MA0522.3	TCF3	66.7285	32.2168	0.491543	SHARED_vs_FOOT	limb
MA0102.4	SHARED	MA0102.4	CEBPA	35.2256	32.2665	0.491323	SHARED_vs_FOOT	limb
MA0485.2	SHARED	MA0485.2	HOXC9	32.0526	15.1615	0.490784	SHARED_vs_FOOT	limb
MA0755.1	SHARED	MA0755.1	CUX2	27.6531	11.7088	0.490354	SHARED_vs_FOOT	limb
MA0516.2	SHARED	MA0516.2	SP2	65.9472	17.1746	0.489979	SHARED_vs_FOOT	limb
MA0060.3	SHARED	MA0060.3	NFYA	49.0251	18.966	0.488057	SHARED_vs_FOOT	limb
MA0648.1	SHARED	MA0648.1	GSC	40.9553	23.8144	0.488031	SHARED_vs_FOOT	limb
MA1534.1	SHARED	MA1534.1	NR1I3	33.6712	38.0598	0.487458	SHARED_vs_FOOT	limb
MA1114.1	SHARED	MA1114.1	PBX3	53.3893	36.7017	0.487025	SHARED_vs_FOOT	limb
MA0767.1	SHARED	MA0767.1	GCM2	61.0601	17.8561	0.485674	SHARED_vs_FOOT	limb
MA1648.1	SHARED	MA1648.1	TCF12(var.2)	66.3889	30.7638	0.485303	SHARED_vs_FOOT	limb
MA0719.1	SHARED	MA0719.1	RHOXF1	44.2332	23.1763	0.485271	SHARED_vs_FOOT	limb
MA0482.2	SHARED	MA0482.2	GATA4	37.0623	35.3172	0.485201	SHARED_vs_FOOT	limb
MA0693.2	SHARED	MA0693.2	VDR	41.8367	55.2981	0.48518	SHARED_vs_FOOT	limb
MA1644.1	SHARED	MA1644.1	NFYC	47.3048	19.6674	0.484312	SHARED_vs_FOOT	limb
MA1596.1	SHARED	MA1596.1	ZNF460	74.5223	42.8602	0.484052	SHARED_vs_FOOT	limb
MA0047.3	SHARED	MA0047.3	FOXA2	29.5097	43.796	0.483024	SHARED_vs_FOOT	limb
MA1521.1	SHARED	MA1521.1	MAFA	54.0082	14.9969	0.482623	SHARED_vs_FOOT	limb
MA0800.1	SHARED	MA0800.1	EOMES	42.79	36.1726	0.482227	SHARED_vs_FOOT	limb
MA0140.2	SHARED	MA0140.2	GATA1::TAL1	44.3252	16.7093	0.481433	SHARED_vs_FOOT	limb
MA0805.1	SHARED	MA0805.1	TBX1	48.9848	39.6483	0.481036	SHARED_vs_FOOT	limb
MA1514.1	SHARED	MA1514.1	KLF17	65.7609	23.0274	0.481006	SHARED_vs_FOOT	limb
MA1151.1	SHARED	MA1151.1	RORC	41.7657	29.1321	0.48042	SHARED_vs_FOOT	limb
MA0813.1	SHARED	MA0813.1	TFAP2B(var.3)	73.9437	18.4697	0.480347	SHARED_vs_FOOT	limb
MA0137.3	SHARED	MA0137.3	STAT1	41.5129	32.7051	0.479813	SHARED_vs_FOOT	limb
MA0076.2	SHARED	MA0076.2	ELK4	63.0996	24.2714	0.47898	SHARED_vs_FOOT	limb
MA1111.1	SHARED	MA1111.1	NR2F2	43.3488	33.997	0.478503	SHARED_vs_FOOT	limb
MA1649.1	SHARED	MA1649.1	ZBTB12	51.1606	25.7397	0.478307	SHARED_vs_FOOT	limb
MA0852.2	SHARED	MA0852.2	FOXK1	38.5569	42.24	0.478213	SHARED_vs_FOOT	limb
MA1150.1	SHARED	MA1150.1	RORB	42.076	27.8394	0.477893	SHARED_vs_FOOT	limb
MA0873.1	SHARED	MA0873.1	HOXD12	33.6716	12.1758	0.477827	SHARED_vs_FOOT	limb
MA0145.3	SHARED	MA0145.3	TFCP2	45.6765	10.4383	0.475969	SHARED_vs_FOOT	limb
MA1148.1	SHARED	MA1148.1	PPARA::RXRA	46.1234	29.9386	0.472696	SHARED_vs_FOOT	limb
MA1480.1	SHARED	MA1480.1	DPRX	39.7762	18.6197	0.471418	SHARED_vs_FOOT	limb
MA1421.1	SHARED	MA1421.1	TCF7L1	35.1397	18.1699	0.471358	SHARED_vs_FOOT	limb
MA0787.1	SHARED	MA0787.1	POU3F2	21.9492	33.7215	0.469763	SHARED_vs_FOOT	limb
MA1651.1	SHARED	MA1651.1	ZFP42	52.8412	17.0073	0.46957	SHARED_vs_FOOT	limb
MA1103.2	SHARED	MA1103.2	FOXK2	32.4699	41.7382	0.469495	SHARED_vs_FOOT	limb
MA0627.2	SHARED	MA0627.2	POU2F3	28.0345	40.157	0.467919	SHARED_vs_FOOT	limb
MA0596.1	SHARED	MA0596.1	SREBF2	54.0347	33.5599	0.466776	SHARED_vs_FOOT	limb
MA0488.1	SHARED	MA0488.1	JUN	38.0469	19.9045	0.46641	SHARED_vs_FOOT	limb
MA0592.3	SHARED	MA0592.3	ESRRA	49.2549	30.0022	0.465595	SHARED_vs_FOOT	limb
MA0056.2	SHARED	MA0056.2	MZF1	51.8025	33.1752	0.465048	SHARED_vs_FOOT	limb
MA0806.1	SHARED	MA0806.1	TBX4	49.6823	45.9351	0.464829	SHARED_vs_FOOT	limb
MA0698.1	SHARED	MA0698.1	ZBTB18	45.7031	26.2685	0.464585	SHARED_vs_FOOT	limb
MA0789.1	SHARED	MA0789.1	POU3F4	21.3394	27.8018	0.46421	SHARED_vs_FOOT	limb
MA0847.2	SHARED	MA0847.2	FOXD2	27.1306	48.277	0.464185	SHARED_vs_FOOT	limb
MA1133.1	SHARED	MA1133.1	JUN::JUNB(var.2)	46.0102	12.5792	0.464098	SHARED_vs_FOOT	limb
MA0517.1	SHARED	MA0517.1	STAT1::STAT2	37.0421	43.329	0.462801	SHARED_vs_FOOT	limb
MA0073.1	SHARED	MA0073.1	RREB1	61.676	33.6422	0.461783	SHARED_vs_FOOT	limb
MA0907.1	SHARED	MA0907.1	HOXC13	35.2778	20.6434	0.460917	SHARED_vs_FOOT	limb
MA0679.2	SHARED	MA0679.2	ONECUT1	23.3078	30.4798	0.460568	SHARED_vs_FOOT	limb
MA0843.1	SHARED	MA0843.1	TEF	30.906	5.92025	0.460409	SHARED_vs_FOOT	limb
MA1567.1	SHARED	MA1567.1	TBX6	51.3706	36.8531	0.459872	SHARED_vs_FOOT	limb
MA0668.1	SHARED	MA0668.1	NEUROD2	47.6673	16.8663	0.459506	SHARED_vs_FOOT	limb
MA0842.2	SHARED	MA0842.2	NRL	43.1587	14.3944	0.457965	SHARED_vs_FOOT	limb
MA0258.2	SHARED	MA0258.2	ESR2	58.2597	29.2269	0.457891	SHARED_vs_FOOT	limb
MA0774.1	SHARED	MA0774.1	MEIS2	50.5089	36.5278	0.457658	SHARED_vs_FOOT	limb
MA1126.1	SHARED	MA1126.1	FOS::JUN(var.2)	44.7903	15.7651	0.45678	SHARED_vs_FOOT	limb
MA1636.1	SHARED	MA1636.1	CEBPG(var.2)	35.3061	26.029	0.456719	SHARED_vs_FOOT	limb
MA0691.1	SHARED	MA0691.1	TFAP4	46.599	17.8613	0.455297	SHARED_vs_FOOT	limb
MA0712.2	SHARED	MA0712.2	OTX2	38.7097	46.7484	0.454725	SHARED_vs_FOOT	limb
MA0687.1	SHARED	MA0687.1	SPIC	40.9848	38.8236	0.454058	SHARED_vs_FOOT	limb
MA0037.3	SHARED	MA0037.3	GATA3	32.4461	30.1995	0.45379	SHARED_vs_FOOT	limb
MA0502.2	SHARED	MA0502.2	NFYB	57.6041	21.6567	0.452633	SHARED_vs_FOOT	limb
MA0635.1	SHARED	MA0635.1	BARHL2	34.3177	19.5879	0.452438	SHARED_vs_FOOT	limb
MA1503.1	SHARED	MA1503.1	HOXB9	31.2373	16.3959	0.452432	SHARED_vs_FOOT	limb
MA0100.3	SHARED	MA0100.3	MYB	50.1526	41.7538	0.451157	SHARED_vs_FOOT	limb
MA0036.3	SHARED	MA0036.3	GATA2	34.1057	31.1821	0.451098	SHARED_vs_FOOT	limb
MA0784.1	SHARED	MA0784.1	POU1F1	24.6905	27.3219	0.450542	SHARED_vs_FOOT	limb
MA1565.1	SHARED	MA1565.1	TBX18	50.5932	46.904	0.450216	SHARED_vs_FOOT	limb
MA1568.1	SHARED	MA1568.1	TCF21(var.2)	49.2373	13.5428	0.448546	SHARED_vs_FOOT	limb
MA0017.2	SHARED	MA0017.2	NR2F1	53.3958	42.2071	0.448469	SHARED_vs_FOOT	limb
MA1599.1	SHARED	MA1599.1	ZNF682	65.2451	22.7458	0.447891	SHARED_vs_FOOT	limb
MA1645.1	SHARED	MA1645.1	NKX2-2	48.9424	38.9304	0.4478	SHARED_vs_FOOT	limb
MA0153.2	SHARED	MA0153.2	HNF1B	20.3443	11.4728	0.447248	SHARED_vs_FOOT	limb
MA0070.1	SHARED	MA0070.1	PBX1	31.53	17.1896	0.447177	SHARED_vs_FOOT	limb
MA0688.1	SHARED	MA0688.1	TBX2	43.9408	37.1839	0.446679	SHARED_vs_FOOT	limb
MA0046.2	SHARED	MA0046.2	HNF1A	22.29	18.7239	0.446653	SHARED_vs_FOOT	limb
MA0798.2	SHARED	MA0798.2	RFX3	52.7697	18.2594	0.446257	SHARED_vs_FOOT	limb
MA0812.1	SHARED	MA0812.1	TFAP2B(var.2)	73.1054	21.4725	0.445551	SHARED_vs_FOOT	limb
MA0101.1	SHARED	MA0101.1	REL	55.7927	25.2949	0.445186	SHARED_vs_FOOT	limb
MA0801.1	SHARED	MA0801.1	MGA	51.465	43.5915	0.444021	SHARED_vs_FOOT	limb
MA1131.1	SHARED	MA1131.1	FOSL2::JUN(var.2)	43.5589	11.8723	0.443531	SHARED_vs_FOOT	limb
MA1104.2	SHARED	MA1104.2	GATA6	30.8176	29.0297	0.443447	SHARED_vs_FOOT	limb
MA1632.1	SHARED	MA1632.1	ATF2	41.4118	22.9169	0.44258	SHARED_vs_FOOT	limb
MA0850.1	SHARED	MA0850.1	FOXP3	29.0276	33.997	0.44125	SHARED_vs_FOOT	limb
MA1105.2	SHARED	MA1105.2	GRHL2	41.1915	31.3086	0.44027	SHARED_vs_FOOT	limb
MA0895.1	SHARED	MA0895.1	HMBOX1	35.5397	17.0465	0.439411	SHARED_vs_FOOT	limb
MA0788.1	SHARED	MA0788.1	POU3F3	20.1258	35.5188	0.439177	SHARED_vs_FOOT	limb
MA0651.1	SHARED	MA0651.1	HOXC11	33.4566	16.3617	0.438122	SHARED_vs_FOOT	limb
MA1683.1	SHARED	MA1683.1	FOXA3	31.3544	39.0567	0.438102	SHARED_vs_FOOT	limb
MA1517.1	SHARED	MA1517.1	KLF6	71.0988	36.5518	0.436113	SHARED_vs_FOOT	limb
MA0136.2	SHARED	MA0136.2	ELF5	51.105	41.7413	0.435002	SHARED_vs_FOOT	limb
MA0786.1	SHARED	MA0786.1	POU3F1	22.1374	41.6186	0.434817	SHARED_vs_FOOT	limb
MA0107.1	SHARED	MA0107.1	RELA	56.3636	19.0185	0.432735	SHARED_vs_FOOT	limb
MA0746.2	SHARED	MA0746.2	SP3	74.7459	24.477	0.431984	SHARED_vs_FOOT	limb
MA1479.1	SHARED	MA1479.1	DMRTC2	29.4317	24.4753	0.43153	SHARED_vs_FOOT	limb
MA0035.4	SHARED	MA0035.4	GATA1	30.4833	18.4955	0.431352	SHARED_vs_FOOT	limb
MA0492.1	SHARED	MA0492.1	JUND(var.2)	39.1069	15.3866	0.431147	SHARED_vs_FOOT	limb
MA0780.1	SHARED	MA0780.1	PAX3	14.4162	5.19725	0.4309	SHARED_vs_FOOT	limb
MA0682.2	SHARED	MA0682.2	PITX1	38.9873	45.9351	0.430696	SHARED_vs_FOOT	limb
MA0511.2	SHARED	MA0511.2	RUNX2	50	22.2762	0.430194	SHARED_vs_FOOT	limb
MA0750.2	SHARED	MA0750.2	ZBTB7A	65.2038	21.5336	0.430009	SHARED_vs_FOOT	limb
MA0785.1	SHARED	MA0785.1	POU2F1	24.5106	34.4595	0.429325	SHARED_vs_FOOT	limb
MA1562.1	SHARED	MA1562.1	SOX14	41.0987	11.4377	0.429145	SHARED_vs_FOOT	limb
MA1656.1	SHARED	MA1656.1	ZNF449	60.6856	27.9048	0.428822	SHARED_vs_FOOT	limb
MA0792.1	SHARED	MA0792.1	POU5F1B	21.9955	36.7479	0.428353	SHARED_vs_FOOT	limb
MA1143.1	SHARED	MA1143.1	FOSL1::JUND(var.2)	44.2406	9.40167	0.426705	SHARED_vs_FOOT	limb
MA0669.1	SHARED	MA0669.1	NEUROG2	39.6552	7.57313	0.425892	SHARED_vs_FOOT	limb
MA0481.3	SHARED	MA0481.3	FOXP1	30.2412	38.8843	0.424136	SHARED_vs_FOOT	limb
MA0909.2	SHARED	MA0909.2	HOXD13	40.8088	12.5984	0.423289	SHARED_vs_FOOT	limb
MA0018.4	SHARED	MA0018.4	CREB1	42.2624	26.9797	0.422958	SHARED_vs_FOOT	limb
MA1145.1	SHARED	MA1145.1	FOSL2::JUND(var.2)	47.0428	9.44068	0.422806	SHARED_vs_FOOT	limb
MA1102.2	SHARED	MA1102.2	CTCFL	78.6078	28.0458	0.422506	SHARED_vs_FOOT	limb
MA0673.1	SHARED	MA0673.1	NKX2-8	47.9143	31.361	0.421894	SHARED_vs_FOOT	limb
MA0479.1	SHARED	MA0479.1	FOXH1	40.1843	26.3053	0.419656	SHARED_vs_FOOT	limb
MA1547.1	SHARED	MA1547.1	PITX2	37.4684	46.904	0.418658	SHARED_vs_FOOT	limb
MA0849.1	SHARED	MA0849.1	FOXO6	27.7457	39.2076	0.417646	SHARED_vs_FOOT	limb
MA0077.1	SHARED	MA0077.1	SOX9	35.7548	20.5253	0.41656	SHARED_vs_FOOT	limb
MA0468.1	SHARED	MA0468.1	DUX4	23.7351	14.5189	0.415886	SHARED_vs_FOOT	limb
MA0826.1	SHARED	MA0826.1	OLIG1	34.0771	5.57278	0.415811	SHARED_vs_FOOT	limb
MA0496.3	SHARED	MA0496.3	MAFK	50.5442	37.705	0.414861	SHARED_vs_FOOT	limb
MA0678.1	SHARED	MA0678.1	OLIG2	37.3604	10.609	0.414545	SHARED_vs_FOOT	limb
MA0768.1	SHARED	MA0768.1	LEF1	35.3501	10.5776	0.413831	SHARED_vs_FOOT	limb
MA0523.1	SHARED	MA0523.1	TCF7L2	39.6514	33.1877	0.41292	SHARED_vs_FOOT	limb
MA1540.1	SHARED	MA1540.1	NR5A1	55.0832	29.9491	0.409554	SHARED_vs_FOOT	limb
MA0499.2	SHARED	MA0499.2	MYOD1	58.9159	39.2076	0.408302	SHARED_vs_FOOT	limb
MA0091.1	SHARED	MA0091.1	TAL1::TCF3	45.3311	18.5942	0.406675	SHARED_vs_FOOT	limb
MA1109.1	SHARED	MA1109.1	NEUROD1	54.1601	32.4102	0.40658	SHARED_vs_FOOT	limb
MA0775.1	SHARED	MA0775.1	MEIS3	48.1576	30.0126	0.404909	SHARED_vs_FOOT	limb
MA0845.1	SHARED	MA0845.1	FOXB1	18.721	42.0307	0.404715	SHARED_vs_FOOT	limb
MA0509.2	SHARED	MA0509.2	RFX1	49.3071	16.5909	0.40405	SHARED_vs_FOOT	limb
MA0048.2	SHARED	MA0048.2	NHLH1	68.4584	24.2895	0.403491	SHARED_vs_FOOT	limb
MA0827.1	SHARED	MA0827.1	OLIG3	38.1098	13.1469	0.403014	SHARED_vs_FOOT	limb
MA0639.1	SHARED	MA0639.1	DBP	31.4721	6.1632	0.400738	SHARED_vs_FOOT	limb
MA1655.1	SHARED	MA1655.1	ZNF341	57.0943	28.7728	0.400558	SHARED_vs_FOOT	limb
MA1468.1	SHARED	MA1468.1	ATOH7	44.9644	23.1193	0.400194	SHARED_vs_FOOT	limb
MA1652.1	SHARED	MA1652.1	ZKSCAN5	54.7636	38.8517	0.398937	SHARED_vs_FOOT	limb
MA0884.1	SHARED	MA0884.1	DUXA	29.8742	18.966	0.39671	SHARED_vs_FOOT	limb
MA0155.1	SHARED	MA0155.1	INSM1	66.5526	24.312	0.396675	SHARED_vs_FOOT	limb
MA1136.1	SHARED	MA1136.1	FOSB::JUNB(var.2)	43.8454	7.59232	0.395948	SHARED_vs_FOOT	limb
MA0050.2	SHARED	MA0050.2	IRF1	35.5588	45.9351	0.395855	SHARED_vs_FOOT	limb
MA1524.1	SHARED	MA1524.1	MSGN1	49.7036	23.8776	0.395326	SHARED_vs_FOOT	limb
MA0025.2	SHARED	MA0025.2	NFIL3	29.1438	18.7176	0.394407	SHARED_vs_FOOT	limb
MA1558.1	SHARED	MA1558.1	SNAI1	59.7152	43.0324	0.393552	SHARED_vs_FOOT	limb
MA0769.2	SHARED	MA0769.2	TCF7	37.164	33.533	0.390695	SHARED_vs_FOOT	limb
MA0162.4	SHARED	MA0162.4	EGR1	75.4909	21.8008	0.389821	SHARED_vs_FOOT	limb
MA0042.2	SHARED	MA0042.2	FOXI1	26.3081	45.7171	0.389487	SHARED_vs_FOOT	limb
MA0848.1	SHARED	MA0848.1	FOXO4	26.6376	45.7171	0.389487	SHARED_vs_FOOT	limb
MA1546.1	SHARED	MA1546.1	PAX3(var.2)	47.7403	4.15962	0.38941	SHARED_vs_FOOT	limb
MA1118.1	SHARED	MA1118.1	SIX1	40.9091	16.6967	0.38795	SHARED_vs_FOOT	limb
MA0715.1	SHARED	MA0715.1	PROP1	7.77058	16.6204	0.386961	SHARED_vs_FOOT	limb
MA0148.4	SHARED	MA0148.4	FOXA1	29.5319	35.9602	0.386224	SHARED_vs_FOOT	limb
MA1113.2	SHARED	MA1113.2	PBX2	27.2799	28.3567	0.385815	SHARED_vs_FOOT	limb
MA0593.1	SHARED	MA0593.1	FOXP2	30.4788	36.8314	0.385515	SHARED_vs_FOOT	limb
MA1633.1	SHARED	MA1633.1	BACH1	50.4334	19.2915	0.384829	SHARED_vs_FOOT	limb
MA0659.2	SHARED	MA0659.2	MAFG	40.0409	24.9271	0.384501	SHARED_vs_FOOT	limb
MA1129.1	SHARED	MA1129.1	FOSL1::JUN(var.2)	42.449	6.26662	0.383384	SHARED_vs_FOOT	limb
MA1511.1	SHARED	MA1511.1	KLF10	71.5605	26.8679	0.383304	SHARED_vs_FOOT	limb
MA1657.1	SHARED	MA1657.1	ZNF652	32.7103	21.0057	0.383056	SHARED_vs_FOOT	limb
MA1639.1	SHARED	MA1639.1	MEIS1(var.2)	31.6863	17.8665	0.38223	SHARED_vs_FOOT	limb
MA1471.1	SHARED	MA1471.1	BARX2	24.5331	38.6715	0.381452	SHARED_vs_FOOT	limb
MA0057.1	SHARED	MA0057.1	MZF1(var.2)	58.4008	28.4998	0.38087	SHARED_vs_FOOT	limb
MA0868.2	SHARED	MA0868.2	SOX8	35.102	27.4001	0.380488	SHARED_vs_FOOT	limb
MA1640.1	SHARED	MA1640.1	MEIS2(var.2)	30.3134	25.353	0.378578	SHARED_vs_FOOT	limb
MA0684.2	SHARED	MA0684.2	RUNX3	43.6224	34.5441	0.3781	SHARED_vs_FOOT	limb
MA0672.1	SHARED	MA0672.1	NKX2-3	47.8217	30.9924	0.377827	SHARED_vs_FOOT	limb
MA0818.1	SHARED	MA0818.1	BHLHE22	39.5727	6.46218	0.377674	SHARED_vs_FOOT	limb
MA0081.2	SHARED	MA0081.2	SPIB	46.1292	35.8768	0.377631	SHARED_vs_FOOT	limb
MA1139.1	SHARED	MA1139.1	FOSL2::JUNB(var.2)	43.1005	5.22818	0.37744	SHARED_vs_FOOT	limb
MA1548.1	SHARED	MA1548.1	PLAGL2	83.8742	17.0197	0.377029	SHARED_vs_FOOT	limb
MA0753.2	SHARED	MA0753.2	ZNF740	79.8589	17.9331	0.37654	SHARED_vs_FOOT	limb
MA1578.1	SHARED	MA1578.1	VEZF1	77.2819	20.3066	0.375784	SHARED_vs_FOOT	limb
MA1512.1	SHARED	MA1512.1	KLF11	75.0923	23.443	0.37572	SHARED_vs_FOOT	limb
MA0513.1	SHARED	MA0513.1	SMAD2::SMAD3::SMAD4	55.5991	30.5338	0.374755	SHARED_vs_FOOT	limb
MA0738.1	SHARED	MA0738.1	HIC2	63.2054	31.0706	0.373708	SHARED_vs_FOOT	limb
MA0068.2	SHARED	MA0068.2	PAX4	24.7776	15.5146	0.373666	SHARED_vs_FOOT	limb
MA0683.1	SHARED	MA0683.1	POU4F2	23.3121	5.49285	0.373365	SHARED_vs_FOOT	limb
MA1520.1	SHARED	MA1520.1	MAF	49.83	10.065	0.373063	SHARED_vs_FOOT	limb
MA0484.2	SHARED	MA0484.2	HNF4G	46.202	21.7229	0.37301	SHARED_vs_FOOT	limb
MA0623.2	SHARED	MA0623.2	NEUROG1	40.4883	5.3681	0.372427	SHARED_vs_FOOT	limb
MA0791.1	SHARED	MA0791.1	POU4F3	24.5379	24.3929	0.372417	SHARED_vs_FOOT	limb
MA0144.2	SHARED	MA0144.2	STAT3	43.675	42.2071	0.372126	SHARED_vs_FOOT	limb
MA1478.1	SHARED	MA1478.1	DMRTA2	34.8639	20.9793	0.371682	SHARED_vs_FOOT	limb
MA0478.1	SHARED	MA0478.1	FOSL2	47.6937	19.2666	0.370532	SHARED_vs_FOOT	limb
MA0090.3	SHARED	MA0090.3	TEAD1	46.2687	29.6265	0.369891	SHARED_vs_FOOT	limb
MA0905.1	SHARED	MA0905.1	HOXC10	28.3249	23.5246	0.369366	SHARED_vs_FOOT	limb
MA0817.1	SHARED	MA0817.1	BHLHE23	34.3486	4.34689	0.369269	SHARED_vs_FOOT	limb
MA1127.1	SHARED	MA1127.1	FOSB::JUN	43.8483	7.14466	0.368208	SHARED_vs_FOOT	limb
MA0497.1	SHARED	MA0497.1	MEF2C	27.7665	51.7724	0.36733	SHARED_vs_FOOT	limb
MA1112.2	SHARED	MA1112.2	NR4A1	40.102	28.7454	0.365454	SHARED_vs_FOOT	limb
MA0062.3	SHARED	MA0062.3	GABPA	50.4727	39.7994	0.365142	SHARED_vs_FOOT	limb
MA0508.3	SHARED	MA0508.3	PRDM1	41.7593	32.4708	0.365125	SHARED_vs_FOOT	limb
MA1570.1	SHARED	MA1570.1	TFAP4(var.2)	43.3503	19.549	0.360757	SHARED_vs_FOOT	limb
MA1647.1	SHARED	MA1647.1	PRDM4	42.6716	31.0695	0.360181	SHARED_vs_FOOT	limb
MA0114.4	SHARED	MA0114.4	HNF4A	45.712	20.4748	0.360148	SHARED_vs_FOOT	limb
MA0032.2	SHARED	MA0032.2	FOXC1	19.87	46.8612	0.359507	SHARED_vs_FOOT	limb
MA0830.2	SHARED	MA0830.2	TCF4	66.143	36.6965	0.359436	SHARED_vs_FOOT	limb
MA1581.1	SHARED	MA1581.1	ZBTB6	60.7227	29.1366	0.359383	SHARED_vs_FOOT	limb
MA0143.4	SHARED	MA0143.4	SOX2	37.4421	23.0123	0.358422	SHARED_vs_FOOT	limb
MA1515.1	SHARED	MA1515.1	KLF2	73.3766	30.7041	0.356849	SHARED_vs_FOOT	limb
MA0846.1	SHARED	MA0846.1	FOXC2	22.7504	55.2981	0.356017	SHARED_vs_FOOT	limb
MA1119.1	SHARED	MA1119.1	SIX2	42.5478	16.7159	0.354936	SHARED_vs_FOOT	limb
MA1121.1	SHARED	MA1121.1	TEAD2	47.0173	27.6185	0.353485	SHARED_vs_FOOT	limb
MA1120.1	SHARED	MA1120.1	SOX13	40.8163	23.9217	0.349924	SHARED_vs_FOOT	limb
MA0706.1	SHARED	MA0706.1	MEOX2	30.9184	13.4377	0.349777	SHARED_vs_FOOT	limb
MA0598.3	SHARED	MA0598.3	EHF	47.9266	38.0598	0.348831	SHARED_vs_FOOT	limb
MA0080.5	SHARED	MA0080.5	SPI1	42.7769	45.6149	0.346293	SHARED_vs_FOOT	limb
MA0495.3	SHARED	MA0495.3	MAFF	38.0831	19.877	0.34612	SHARED_vs_FOOT	limb
MA0471.2	SHARED	MA0471.2	E2F6	68.2602	26.7958	0.345642	SHARED_vs_FOOT	limb
MA0084.1	SHARED	MA0084.1	SRY	24.0363	28.4439	0.344259	SHARED_vs_FOOT	limb
MA1467.1	SHARED	MA1467.1	ATOH1(var.2)	52.6849	19.1331	0.342427	SHARED_vs_FOOT	limb
MA0681.2	SHARED	MA0681.2	PHOX2B	15.0606	25.7221	0.341756	SHARED_vs_FOOT	limb
MA1115.1	SHARED	MA1115.1	POU5F1	30.0186	31.1217	0.34044	SHARED_vs_FOOT	limb
MA0908.1	SHARED	MA0908.1	HOXD11	28.1377	17.6192	0.340169	SHARED_vs_FOOT	limb
MA0642.1	SHARED	MA0642.1	EN2	38.634	12.1239	0.339874	SHARED_vs_FOOT	limb
MA0820.1	SHARED	MA0820.1	FIGLA	54.4898	39.7417	0.338549	SHARED_vs_FOOT	limb
MA1601.1	SHARED	MA1601.1	ZNF75D	52.8993	28.6751	0.336635	SHARED_vs_FOOT	limb
MA0650.2	SHARED	MA0650.2	HOXA13	34.3173	14.4043	0.335631	SHARED_vs_FOOT	limb
MA0875.1	SHARED	MA0875.1	BARX1	29.9873	18.4605	0.335496	SHARED_vs_FOOT	limb
MA1641.1	SHARED	MA1641.1	MYF5	55.7627	17.6192	0.335062	SHARED_vs_FOOT	limb
MA0790.1	SHARED	MA0790.1	POU4F1	20.8879	22.3673	0.334502	SHARED_vs_FOOT	limb
MA1535.1	SHARED	MA1535.1	NR2C1	58.0135	42.2816	0.33434	SHARED_vs_FOOT	limb
MA1564.1	SHARED	MA1564.1	SP9	74.1277	21.8812	0.333388	SHARED_vs_FOOT	limb
MA0119.1	SHARED	MA0119.1	NFIC::TLX1	59.3931	8.9914	0.331437	SHARED_vs_FOOT	limb
MA0033.2	SHARED	MA0033.2	FOXL1	22.1739	44.8633	0.331078	SHARED_vs_FOOT	limb
MA0793.1	SHARED	MA0793.1	POU6F2	28.5132	18.918	0.33107	SHARED_vs_FOOT	limb
MA1505.1	SHARED	MA1505.1	HOXC8	27.5032	6.86523	0.330713	SHARED_vs_FOOT	limb
MA1631.1	SHARED	MA1631.1	ASCL1(var.2)	65.7255	28.9056	0.330462	SHARED_vs_FOOT	limb
MA1593.1	SHARED	MA1593.1	ZNF317	45.9574	25.2441	0.329953	SHARED_vs_FOOT	limb
MA0761.2	SHARED	MA0761.2	ETV1	49.7817	33.4134	0.328451	SHARED_vs_FOOT	limb
MA0747.1	SHARED	MA0747.1	SP8	70.5433	24.4448	0.328424	SHARED_vs_FOOT	limb
MA0052.4	SHARED	MA0052.4	MEF2A	25.2553	53.6326	0.326494	SHARED_vs_FOOT	limb
MA1522.1	SHARED	MA1522.1	MAZ	78.8745	17.3993	0.326472	SHARED_vs_FOOT	limb
MA1642.1	SHARED	MA1642.1	NEUROG2(var.2)	52.4333	25.9796	0.325849	SHARED_vs_FOOT	limb
MA0809.2	SHARED	MA0809.2	TEAD4	43.9252	28.4224	0.325798	SHARED_vs_FOOT	limb
MA1123.2	SHARED	MA1123.2	TWIST1	48.8226	26.9278	0.324276	SHARED_vs_FOOT	limb
MA0878.2	SHARED	MA0878.2	CDX1	34.8666	12.6402	0.324082	SHARED_vs_FOOT	limb
MA1497.1	SHARED	MA1497.1	HOXA6	34.7208	7.11256	0.324071	SHARED_vs_FOOT	limb
MA0442.2	SHARED	MA0442.2	SOX10	38.8323	38.9557	0.323965	SHARED_vs_FOOT	limb
MA1646.1	SHARED	MA1646.1	OSR2	51.9182	27.8119	0.323893	SHARED_vs_FOOT	limb
MA1107.2	SHARED	MA1107.2	KLF9	66.3903	27.5507	0.32363	SHARED_vs_FOOT	limb
MA1501.1	SHARED	MA1501.1	HOXB7	35.4315	14.2421	0.323464	SHARED_vs_FOOT	limb
MA0703.2	SHARED	MA0703.2	LMX1B	12.0849	11.7862	0.323292	SHARED_vs_FOOT	limb
MA1100.2	SHARED	MA1100.2	ASCL1	63.313	24.8861	0.321964	SHARED_vs_FOOT	limb
MA0154.4	SHARED	MA0154.4	EBF1	64.0572	16.9289	0.319328	SHARED_vs_FOOT	limb
MA0888.1	SHARED	MA0888.1	EVX2	34.0793	9.06855	0.318206	SHARED_vs_FOOT	limb
MA0814.2	SHARED	MA0814.2	TFAP2C(var.2)	70.1308	26.2397	0.317493	SHARED_vs_FOOT	limb
MA0658.1	SHARED	MA0658.1	LHX6	27.5407	10.9769	0.316338	SHARED_vs_FOOT	limb
MA1569.1	SHARED	MA1569.1	TFAP2E	79.2244	15.3443	0.316161	SHARED_vs_FOOT	limb
MA1579.1	SHARED	MA1579.1	ZBTB26	47.1826	32.3921	0.31607	SHARED_vs_FOOT	limb
MA0161.2	SHARED	MA0161.2	NFIC	52.5534	10.6303	0.315955	SHARED_vs_FOOT	limb
MA0892.1	SHARED	MA0892.1	GSX1	30.683	6.64041	0.315354	SHARED_vs_FOOT	limb
MA1525.1	SHARED	MA1525.1	NFATC4	40.2229	32.5396	0.313733	SHARED_vs_FOOT	limb
MA0644.1	SHARED	MA0644.1	ESX1	30.0102	12.1758	0.31099	SHARED_vs_FOOT	limb
MA1498.1	SHARED	MA1498.1	HOXA7	31.8528	15.1681	0.309823	SHARED_vs_FOOT	limb
MA0003.4	SHARED	MA0003.4	TFAP2A	65.9606	25.7637	0.309093	SHARED_vs_FOOT	limb
MA1108.2	SHARED	MA1108.2	MXI1	51.5244	35.8497	0.309023	SHARED_vs_FOOT	limb
MA1495.1	SHARED	MA1495.1	HOXA1	28.9708	7.74524	0.307984	SHARED_vs_FOOT	limb
MA0500.2	SHARED	MA0500.2	MYOG	59.5238	20.0019	0.307754	SHARED_vs_FOOT	limb
MA0628.1	SHARED	MA0628.1	POU6F1	20.5703	9.88018	0.307088	SHARED_vs_FOOT	limb
MA0473.3	SHARED	MA0473.3	ELF1	52	26.393	0.306926	SHARED_vs_FOOT	limb
MA0876.1	SHARED	MA0876.1	BSX	31.0038	14.0622	0.306485	SHARED_vs_FOOT	limb
MA0741.1	SHARED	MA0741.1	KLF16	78.9474	17.4931	0.30084	SHARED_vs_FOOT	limb
MA1500.1	SHARED	MA1500.1	HOXB6	31.0433	12.3317	0.300707	SHARED_vs_FOOT	limb
MA0887.1	SHARED	MA0887.1	EVX1	34.3177	7.33865	0.300669	SHARED_vs_FOOT	limb
MA0723.1	SHARED	MA0723.1	VAX2	25.54	13.5846	0.299535	SHARED_vs_FOOT	limb
MA0524.2	SHARED	MA0524.2	TFAP2C	72.449	13.1962	0.298857	SHARED_vs_FOOT	limb
MA0722.1	SHARED	MA0722.1	VAX1	23.8217	11.1766	0.297653	SHARED_vs_FOOT	limb
MA0725.1	SHARED	MA0725.1	VSX1	21.4013	11.1766	0.297653	SHARED_vs_FOOT	limb
MA0713.1	SHARED	MA0713.1	PHOX2A	15.7553	14.9969	0.2962	SHARED_vs_FOOT	limb
MA0103.3	SHARED	MA0103.3	ZEB1	65.2739	37.4693	0.295969	SHARED_vs_FOOT	limb
MA0811.1	SHARED	MA0811.1	TFAP2B	72.6887	13.3804	0.295822	SHARED_vs_FOOT	limb
MA0889.1	SHARED	MA0889.1	GBX1	31.8737	14.424	0.29515	SHARED_vs_FOOT	limb
MA1132.1	SHARED	MA1132.1	JUN::JUNB	42.5662	12.5619	0.294727	SHARED_vs_FOOT	limb
MA0465.2	SHARED	MA0465.2	CDX2	28.887	25.9514	0.294446	SHARED_vs_FOOT	limb
MA0612.2	SHARED	MA0612.2	EMX1	23.1646	14.975	0.29389	SHARED_vs_FOOT	limb
MA1549.1	SHARED	MA1549.1	POU6F1(var.2)	32.5534	14.058	0.292423	SHARED_vs_FOOT	limb
MA1637.1	SHARED	MA1637.1	EBF3	64.1287	14.8231	0.292026	SHARED_vs_FOOT	limb
MA1152.1	SHARED	MA1152.1	SOX15	30.7614	42.8753	0.29094	SHARED_vs_FOOT	limb
MA0702.2	SHARED	MA0702.2	LMX1A	11.0127	12.1063	0.289301	SHARED_vs_FOOT	limb
MA1496.1	SHARED	MA1496.1	HOXA4	32.6996	11.9627	0.288804	SHARED_vs_FOOT	limb
MA0808.1	SHARED	MA0808.1	TEAD3	44.3038	20.8231	0.287858	SHARED_vs_FOOT	limb
MA0912.2	SHARED	MA0912.2	HOXD3	25.4753	12.3915	0.285858	SHARED_vs_FOOT	limb
MA0661.1	SHARED	MA0661.1	MEOX1	32.0082	12.6662	0.284807	SHARED_vs_FOOT	limb
MA1463.1	SHARED	MA1463.1	ARGFX	20	12.7752	0.283747	SHARED_vs_FOOT	limb
MA1125.1	SHARED	MA1125.1	ZNF384	15.1055	46.9249	0.283065	SHARED_vs_FOOT	limb
MA0726.1	SHARED	MA0726.1	VSX2	20.6633	11.0527	0.283033	SHARED_vs_FOOT	limb
MA0640.2	SHARED	MA0640.2	ELF3	50.3282	29.4347	0.282898	SHARED_vs_FOOT	limb
MA0867.2	SHARED	MA0867.2	SOX4	40.2041	32.9246	0.282624	SHARED_vs_FOOT	limb
MA0625.1	SHARED	MA0625.1	NFATC3	37.9065	29.1663	0.28192	SHARED_vs_FOOT	limb
MA0886.1	SHARED	MA0886.1	EMX2	29.2089	12.8152	0.2818	SHARED_vs_FOOT	limb
MA0902.2	SHARED	MA0902.2	HOXB2	29.9873	13.6943	0.281702	SHARED_vs_FOOT	limb
MA1473.1	SHARED	MA1473.1	CDX4	31.7972	13.3557	0.28139	SHARED_vs_FOOT	limb
MA0810.1	SHARED	MA0810.1	TFAP2A(var.2)	75.2332	13.3911	0.280129	SHARED_vs_FOOT	limb
MA0910.2	SHARED	MA0910.2	HOXD8	31.519	12.6552	0.27917	SHARED_vs_FOOT	limb
MA0528.2	SHARED	MA0528.2	ZNF263	67.4339	19.6185	0.275589	SHARED_vs_FOOT	limb
MA0158.2	SHARED	MA0158.2	HOXA5	32.0659	11.8827	0.27518	SHARED_vs_FOOT	limb
MA0724.1	SHARED	MA0724.1	VENTX	31.6027	8.89324	0.273363	SHARED_vs_FOOT	limb
MA1142.1	SHARED	MA1142.1	FOSL1::JUND	39.7358	10.4372	0.272175	SHARED_vs_FOOT	limb
MA1530.1	SHARED	MA1530.1	NKX6-3	29.4582	15.1425	0.271111	SHARED_vs_FOOT	limb
MA1134.1	SHARED	MA1134.1	FOS::JUNB	42.9297	9.31946	0.268079	SHARED_vs_FOOT	limb
MA0099.3	SHARED	MA0099.3	FOS::JUN	41.4634	11.9533	0.267936	SHARED_vs_FOOT	limb
MA1502.1	SHARED	MA1502.1	HOXB8	30.2149	13.9443	0.267711	SHARED_vs_FOOT	limb
MA0152.1	SHARED	MA0152.1	NFATC2	34.7953	32.7	0.267293	SHARED_vs_FOOT	limb
MA0027.2	SHARED	MA0027.2	EN1	25	14.4405	0.26659	SHARED_vs_FOOT	limb
MA0675.1	SHARED	MA0675.1	NKX6-2	22.6752	11.5896	0.266496	SHARED_vs_FOOT	limb
MA1144.1	SHARED	MA1144.1	FOSL2::JUND	41.3374	10.5094	0.266093	SHARED_vs_FOOT	limb
MA0662.1	SHARED	MA0662.1	MIXL1	28.8776	9.59952	0.265289	SHARED_vs_FOOT	limb
MA0710.1	SHARED	MA0710.1	NOTO	28.8325	16.1332	0.263807	SHARED_vs_FOOT	limb
MA0462.2	SHARED	MA0462.2	BATF::JUN	38.197	12.3634	0.263275	SHARED_vs_FOOT	limb
MA0699.1	SHARED	MA0699.1	LBX2	32.7551	8.17763	0.262858	SHARED_vs_FOOT	limb
MA0674.1	SHARED	MA0674.1	NKX6-1	19.797	16.5052	0.262614	SHARED_vs_FOOT	limb
MA0904.2	SHARED	MA0904.2	HOXB5	29.4043	7.80017	0.261922	SHARED_vs_FOOT	limb
MA0701.2	SHARED	MA0701.2	LHX9	22.2503	10.6114	0.261365	SHARED_vs_FOOT	limb
MA0700.2	SHARED	MA0700.2	LHX2	28.0037	14.5091	0.259325	SHARED_vs_FOOT	limb
MA1130.1	SHARED	MA1130.1	FOSL2::JUN	43.1239	11.4216	0.259301	SHARED_vs_FOOT	limb
MA1137.1	SHARED	MA1137.1	FOSL1::JUNB	41.9937	10.918	0.259191	SHARED_vs_FOOT	limb
MA1508.1	SHARED	MA1508.1	IKZF1	44.8217	33.5482	0.258964	SHARED_vs_FOOT	limb
MA1634.1	SHARED	MA1634.1	BATF	38.0334	12.0985	0.258726	SHARED_vs_FOOT	limb
MA0882.1	SHARED	MA0882.1	DLX6	23.2143	18.7896	0.258538	SHARED_vs_FOOT	limb
MA0666.1	SHARED	MA0666.1	MSX1	28.535	15.3476	0.258536	SHARED_vs_FOOT	limb
MA1638.1	SHARED	MA1638.1	HAND2	52.1783	27.8	0.257021	SHARED_vs_FOOT	limb
MA0717.1	SHARED	MA0717.1	RAX2	24.6173	8.69771	0.256835	SHARED_vs_FOOT	limb
MA0903.1	SHARED	MA0903.1	HOXB3	30.5102	9.74046	0.256279	SHARED_vs_FOOT	limb
MA1653.1	SHARED	MA1653.1	ZNF148	81.3084	15.6509	0.254979	SHARED_vs_FOOT	limb
MA0890.1	SHARED	MA0890.1	GBX2	29.4898	15.7717	0.25487	SHARED_vs_FOOT	limb
MA1128.1	SHARED	MA1128.1	FOSL1::JUN	43.0479	11.0452	0.253293	SHARED_vs_FOOT	limb
MA1138.1	SHARED	MA1138.1	FOSL2::JUNB	40.081	9.70419	0.252923	SHARED_vs_FOOT	limb
MA0893.2	SHARED	MA0893.2	GSX2	31.385	12.1758	0.252659	SHARED_vs_FOOT	limb
MA1141.1	SHARED	MA1141.1	FOS::JUND	44.7307	9.67326	0.252444	SHARED_vs_FOOT	limb
MA1643.1	SHARED	MA1643.1	NFIB	59.0379	5.3577	0.251742	SHARED_vs_FOOT	limb
MA0899.1	SHARED	MA0899.1	HOXA10	26.4624	22.8089	0.251608	SHARED_vs_FOOT	limb
MA0618.1	SHARED	MA0618.1	LBX1	23.731	13.2621	0.250035	SHARED_vs_FOOT	limb
MA1577.1	SHARED	MA1577.1	TLX2	20.7858	14.6005	0.249287	SHARED_vs_FOOT	limb
MA0477.2	SHARED	MA0477.2	FOSL1	41.7125	9.12669	0.248646	SHARED_vs_FOOT	limb
MA1635.1	SHARED	MA1635.1	BHLHE22(var.2)	64.503	18.1536	0.248548	SHARED_vs_FOOT	limb
MA0901.2	SHARED	MA0901.2	HOXB13	23.0825	26.6881	0.248282	SHARED_vs_FOOT	limb
MA0835.2	SHARED	MA0835.2	BATF3	36.3383	11.4695	0.246224	SHARED_vs_FOOT	limb
MA0708.1	SHARED	MA0708.1	MSX2	26.3024	14.4405	0.245381	SHARED_vs_FOOT	limb
MA1135.1	SHARED	MA1135.1	FOSB::JUNB	41.0987	9.245	0.24529	SHARED_vs_FOOT	limb
MA0914.1	SHARED	MA0914.1	ISL2	35.0765	8.60397	0.243577	SHARED_vs_FOOT	limb
MA1519.1	SHARED	MA1519.1	LHX5	19.8986	15.3885	0.243111	SHARED_vs_FOOT	limb
MA0718.1	SHARED	MA0718.1	RAX	25.4842	13.4627	0.242836	SHARED_vs_FOOT	limb
MA0913.2	SHARED	MA0913.2	HOXD9	25.1521	17.1951	0.242422	SHARED_vs_FOOT	limb
MA1476.1	SHARED	MA1476.1	DLX5	22.5888	20.3477	0.241211	SHARED_vs_FOOT	limb
MA0707.1	SHARED	MA0707.1	MNX1	23.4756	15.3885	0.240649	SHARED_vs_FOOT	limb
MA0634.1	SHARED	MA0634.1	ALX3	27.0961	9.33282	0.240621	SHARED_vs_FOOT	limb
MA0630.1	SHARED	MA0630.1	SHOX	22.293	6.33441	0.239272	SHARED_vs_FOOT	limb
MA0721.1	SHARED	MA0721.1	UNCX	22.9008	8.09035	0.239078	SHARED_vs_FOOT	limb
MA0489.1	SHARED	MA0489.1	JUN(var.2)	42.547	8.93605	0.237225	SHARED_vs_FOOT	limb
MA0671.1	SHARED	MA0671.1	NFIX	57.1267	13.0086	0.235392	SHARED_vs_FOOT	limb
MA1499.1	SHARED	MA1499.1	HOXB4	22.9404	16.0118	0.234484	SHARED_vs_FOOT	limb
MA0075.3	SHARED	MA0075.3	PRRX2	19.4162	12.7168	0.234357	SHARED_vs_FOOT	limb
MA1481.1	SHARED	MA1481.1	DRGX	22.8717	13.639	0.233562	SHARED_vs_FOOT	limb
MA0894.1	SHARED	MA0894.1	HESX1	27.0876	14.5927	0.233345	SHARED_vs_FOOT	limb
MA0491.2	SHARED	MA0491.2	JUND	39.8585	7.25151	0.233106	SHARED_vs_FOOT	limb
MA0599.1	SHARED	MA0599.1	KLF5	79.4742	21.5285	0.231565	SHARED_vs_FOOT	limb
MA0490.2	SHARED	MA0490.2	JUNB	38.5647	7.80017	0.230457	SHARED_vs_FOOT	limb
MA1528.1	SHARED	MA1528.1	NFIX(var.2)	61.7365	4.80133	0.228426	SHARED_vs_FOOT	limb
MA0900.2	SHARED	MA0900.2	HOXA2	22.6582	12.9714	0.2275	SHARED_vs_FOOT	limb
MA0764.2	SHARED	MA0764.2	ETV4	53.3469	33.3258	0.22625	SHARED_vs_FOOT	limb
MA1504.1	SHARED	MA1504.1	HOXC4	25.1899	16.2425	0.221774	SHARED_vs_FOOT	limb
MA0716.1	SHARED	MA0716.1	PRRX1	21.2005	12.2248	0.219881	SHARED_vs_FOOT	limb
MA1472.1	SHARED	MA1472.1	BHLHA15(var.2)	54.842	13.7214	0.219061	SHARED_vs_FOOT	limb
MA1116.1	SHARED	MA1116.1	RBPJ	52.9412	28.0458	0.213756	SHARED_vs_FOOT	limb
MA0039.4	SHARED	MA0039.4	KLF4	73.3844	17.1838	0.210706	SHARED_vs_FOOT	limb
MA0654.1	SHARED	MA0654.1	ISX	19.8986	12.8383	0.210122	SHARED_vs_FOOT	limb
MA0476.1	SHARED	MA0476.1	FOS	42.2899	6.96593	0.208869	SHARED_vs_FOOT	limb
MA1507.1	SHARED	MA1507.1	HOXD4	23.9544	12.5792	0.198551	SHARED_vs_FOOT	limb
MA0132.2	SHARED	MA0132.2	PDX1	23.6041	11.3444	0.186231	SHARED_vs_FOOT	limb
MA0670.1	SHARED	MA0670.1	NFIA	49.3401	12.2465	0.176195	SHARED_vs_FOOT	limb
MA1518.1	SHARED	MA1518.1	LHX1	32.2293	6.98806	0.907143	SHARED_vs_HAND	limb
MA0777.1	SHARED	MA0777.1	MYBL2	47.7906	5.44459	0.836016	SHARED_vs_HAND	limb
MA0865.1	SHARED	MA0865.1	E2F8	50.5485	6.68853	0.763752	SHARED_vs_HAND	limb
MA0873.1	SHARED	MA0873.1	HOXD12	33.6716	22.0056	0.739585	SHARED_vs_HAND	limb
MA0527.1	SHARED	MA0527.1	ZBTB33	61.1413	7.27258	0.735132	SHARED_vs_HAND	limb
MA0594.2	SHARED	MA0594.2	HOXA9	40.6728	7.98707	0.733634	SHARED_vs_HAND	limb
MA1505.1	SHARED	MA1505.1	HOXC8	27.5032	22.4993	0.724684	SHARED_vs_HAND	limb
MA0485.2	SHARED	MA0485.2	HOXC9	32.0526	25.0293	0.720936	SHARED_vs_HAND	limb
MA0906.1	SHARED	MA0906.1	HOXC12	33.7937	23.4062	0.714121	SHARED_vs_HAND	limb
MA1495.1	SHARED	MA1495.1	HOXA1	28.9708	27.8675	0.712276	SHARED_vs_HAND	limb
MA0907.1	SHARED	MA0907.1	HOXC13	35.2778	36.7977	0.707305	SHARED_vs_HAND	limb
MA0106.3	SHARED	MA0106.3	TP53	52.6256	4.7968	0.701862	SHARED_vs_HAND	limb
MA0642.1	SHARED	MA0642.1	EN2	38.634	35.7661	0.698816	SHARED_vs_HAND	limb
MA0892.1	SHARED	MA0892.1	GSX1	30.683	21.9925	0.697369	SHARED_vs_HAND	limb
MA0651.1	SHARED	MA0651.1	HOXC11	33.4566	31.0939	0.696476	SHARED_vs_HAND	limb
MA0703.2	SHARED	MA0703.2	LMX1B	12.0849	37.351	0.694633	SHARED_vs_HAND	limb
MA0821.1	SHARED	MA0821.1	HES5	70.3046	4.56407	0.688803	SHARED_vs_HAND	limb
MA1503.1	SHARED	MA1503.1	HOXB9	31.2373	28.8107	0.686684	SHARED_vs_HAND	limb
MA0822.1	SHARED	MA0822.1	HES7	72.827	7.31145	0.685108	SHARED_vs_HAND	limb
MA1506.1	SHARED	MA1506.1	HOXD10	34.5304	20.0098	0.677397	SHARED_vs_HAND	limb
MA0662.1	SHARED	MA0662.1	MIXL1	28.8776	38.9576	0.657993	SHARED_vs_HAND	limb
MA0637.1	SHARED	MA0637.1	CENPB	56.7641	9.86493	0.656986	SHARED_vs_HAND	limb
MA0726.1	SHARED	MA0726.1	VSX2	20.6633	39.5502	0.650912	SHARED_vs_HAND	limb
MA0644.1	SHARED	MA0644.1	ESX1	30.0102	36.3782	0.643801	SHARED_vs_HAND	limb
MA0722.1	SHARED	MA0722.1	VAX1	23.8217	35.853	0.642503	SHARED_vs_HAND	limb
MA0725.1	SHARED	MA0725.1	VSX1	21.4013	35.853	0.642503	SHARED_vs_HAND	limb
MA1497.1	SHARED	MA1497.1	HOXA6	34.7208	19.4861	0.639133	SHARED_vs_HAND	limb
MA0699.1	SHARED	MA0699.1	LBX2	32.7551	31.9449	0.634019	SHARED_vs_HAND	limb
MA0675.1	SHARED	MA0675.1	NKX6-2	22.6752	43.7132	0.633677	SHARED_vs_HAND	limb
MA0650.2	SHARED	MA0650.2	HOXA13	34.3173	36.7697	0.633607	SHARED_vs_HAND	limb
MA0903.1	SHARED	MA0903.1	HOXB3	30.5102	38.9576	0.627665	SHARED_vs_HAND	limb
MA0886.1	SHARED	MA0886.1	EMX2	29.2089	43.2902	0.627354	SHARED_vs_HAND	limb
MA0706.1	SHARED	MA0706.1	MEOX2	30.9184	31.5641	0.62724	SHARED_vs_HAND	limb
MA1527.1	SHARED	MA1527.1	NFIC(var.2)	60.5499	9.48266	0.625502	SHARED_vs_HAND	limb
MA0732.1	SHARED	MA0732.1	EGR3	69.5799	7.16632	0.623526	SHARED_vs_HAND	limb
MA0904.2	SHARED	MA0904.2	HOXB5	29.4043	29.5879	0.620352	SHARED_vs_HAND	limb
MA0634.1	SHARED	MA0634.1	ALX3	27.0961	40.3535	0.616744	SHARED_vs_HAND	limb
MA0723.1	SHARED	MA0723.1	VAX2	25.54	40.2491	0.616486	SHARED_vs_HAND	limb
MA0721.1	SHARED	MA0721.1	UNCX	22.9008	35.1318	0.613437	SHARED_vs_HAND	limb
MA0701.2	SHARED	MA0701.2	LHX9	22.2503	39.1741	0.611492	SHARED_vs_HAND	limb
MA0757.1	SHARED	MA0757.1	ONECUT3	19.0407	20.784	0.610236	SHARED_vs_HAND	limb
MA1418.1	SHARED	MA1418.1	IRF3	45.8111	5.1019	0.609265	SHARED_vs_HAND	limb
MA0630.1	SHARED	MA0630.1	SHOX	22.293	27.0339	0.607981	SHARED_vs_HAND	limb
MA0861.1	SHARED	MA0861.1	TP73	48.953	8.66289	0.605475	SHARED_vs_HAND	limb
MA0912.2	SHARED	MA0912.2	HOXD3	25.4753	38.6768	0.605427	SHARED_vs_HAND	limb
MA1463.1	SHARED	MA1463.1	ARGFX	20	40.219	0.604017	SHARED_vs_HAND	limb
MA0612.2	SHARED	MA0612.2	EMX1	23.1646	43.9976	0.602816	SHARED_vs_HAND	limb
MA0766.2	SHARED	MA0766.2	GATA5	38.4381	31.0306	0.600906	SHARED_vs_HAND	limb
MA0661.1	SHARED	MA0661.1	MEOX1	32.0082	39.0712	0.600012	SHARED_vs_HAND	limb
MA0119.1	SHARED	MA0119.1	NFIC::TLX1	59.3931	21.5021	0.598741	SHARED_vs_HAND	limb
MA0909.2	SHARED	MA0909.2	HOXD13	40.8088	19.6366	0.597674	SHARED_vs_HAND	limb
MA0902.2	SHARED	MA0902.2	HOXB2	29.9873	42.5998	0.596107	SHARED_vs_HAND	limb
MA0875.1	SHARED	MA0875.1	BARX1	29.9873	42.493	0.595942	SHARED_vs_HAND	limb
MA0658.1	SHARED	MA0658.1	LHX6	27.5407	27.9276	0.593302	SHARED_vs_HAND	limb
MA0891.1	SHARED	MA0891.1	GSC2	39.8167	21.9894	0.591605	SHARED_vs_HAND	limb
MA0876.1	SHARED	MA0876.1	BSX	31.0038	37.351	0.591332	SHARED_vs_HAND	limb
MA0893.2	SHARED	MA0893.2	GSX2	31.385	44.4924	0.589476	SHARED_vs_HAND	limb
MA0888.1	SHARED	MA0888.1	EVX2	34.0793	22.4068	0.587706	SHARED_vs_HAND	limb
MA0889.1	SHARED	MA0889.1	GBX1	31.8737	40.2057	0.585284	SHARED_vs_HAND	limb
MA0702.2	SHARED	MA0702.2	LMX1A	11.0127	34.852	0.58336	SHARED_vs_HAND	limb
MA0905.1	SHARED	MA0905.1	HOXC10	28.3249	44.1215	0.583333	SHARED_vs_HAND	limb
MA1501.1	SHARED	MA1501.1	HOXB7	35.4315	33.8901	0.582885	SHARED_vs_HAND	limb
MA0756.1	SHARED	MA0756.1	ONECUT2	23.2169	16.1758	0.582724	SHARED_vs_HAND	limb
MA0717.1	SHARED	MA0717.1	RAX2	24.6173	30.6855	0.582133	SHARED_vs_HAND	limb
MA0027.2	SHARED	MA0027.2	EN1	25	46.9993	0.581925	SHARED_vs_HAND	limb
MA0628.1	SHARED	MA0628.1	POU6F1	20.5703	25.2727	0.57765	SHARED_vs_HAND	limb
MA1500.1	SHARED	MA1500.1	HOXB6	31.0433	32.6267	0.575734	SHARED_vs_HAND	limb
MA0158.2	SHARED	MA0158.2	HOXA5	32.0659	36.1758	0.572538	SHARED_vs_HAND	limb
MA1124.1	SHARED	MA1124.1	ZNF24	31.9466	23.6481	0.56864	SHARED_vs_HAND	limb
MA0887.1	SHARED	MA0887.1	EVX1	34.3177	18.9786	0.568557	SHARED_vs_HAND	limb
MA1589.1	SHARED	MA1589.1	ZNF140	50.3887	6.73619	0.567583	SHARED_vs_HAND	limb
MA0623.2	SHARED	MA0623.2	NEUROG1	40.4883	9.42558	0.563274	SHARED_vs_HAND	limb
MA0910.2	SHARED	MA0910.2	HOXD8	31.519	36.4507	0.561899	SHARED_vs_HAND	limb
MA1496.1	SHARED	MA1496.1	HOXA4	32.6996	32.4477	0.561742	SHARED_vs_HAND	limb
MA0871.2	SHARED	MA0871.2	TFEC	60.8133	11.2625	0.561629	SHARED_vs_HAND	limb
MA0708.1	SHARED	MA0708.1	MSX2	26.3024	50.8355	0.561395	SHARED_vs_HAND	limb
MA0818.1	SHARED	MA0818.1	BHLHE22	39.5727	10.9985	0.559405	SHARED_vs_HAND	limb
MA0826.1	SHARED	MA0826.1	OLIG1	34.0771	7.93943	0.557803	SHARED_vs_HAND	limb
MA1498.1	SHARED	MA1498.1	HOXA7	31.8528	35.7187	0.554976	SHARED_vs_HAND	limb
MA0620.3	SHARED	MA0620.3	MITF	47.5651	11.7568	0.554578	SHARED_vs_HAND	limb
MA0793.1	SHARED	MA0793.1	POU6F2	28.5132	39.5312	0.55453	SHARED_vs_HAND	limb
MA0817.1	SHARED	MA0817.1	BHLHE23	34.3486	7.53786	0.554521	SHARED_vs_HAND	limb
MA0068.2	SHARED	MA0068.2	PAX4	24.7776	26.4976	0.554374	SHARED_vs_HAND	limb
MA0908.1	SHARED	MA0908.1	HOXD11	28.1377	35.3689	0.554126	SHARED_vs_HAND	limb
MA0862.1	SHARED	MA0862.1	GMEB2	41.0941	4.3191	0.553207	SHARED_vs_HAND	limb
MA0863.1	SHARED	MA0863.1	MTF1	57.9942	5.07117	0.552029	SHARED_vs_HAND	limb
MA1557.1	SHARED	MA1557.1	SMAD5	50.3067	6.48378	0.551891	SHARED_vs_HAND	limb
MA0877.2	SHARED	MA0877.2	BARHL1	36.5019	4.69386	0.549959	SHARED_vs_HAND	limb
MA0795.1	SHARED	MA0795.1	SMAD3	46.9512	5.06388	0.548358	SHARED_vs_HAND	limb
MA0890.1	SHARED	MA0890.1	GBX2	29.4898	49.7365	0.546357	SHARED_vs_HAND	limb
MA0884.1	SHARED	MA0884.1	DUXA	29.8742	28.5398	0.54588	SHARED_vs_HAND	limb
MA0468.1	SHARED	MA0468.1	DUX4	23.7351	20.0871	0.54558	SHARED_vs_HAND	limb
MA0063.2	SHARED	MA0063.2	NKX2-5	43.7732	28.4993	0.544717	SHARED_vs_HAND	limb
MA0900.2	SHARED	MA0900.2	HOXA2	22.6582	49.308	0.542819	SHARED_vs_HAND	limb
MA0878.2	SHARED	MA0878.2	CDX1	34.8666	26.3761	0.539905	SHARED_vs_HAND	limb
MA1473.1	SHARED	MA1473.1	CDX4	31.7972	35.3087	0.539465	SHARED_vs_HAND	limb
MA1643.1	SHARED	MA1643.1	NFIB	59.0379	16.8487	0.533956	SHARED_vs_HAND	limb
MA1545.1	SHARED	MA1545.1	OVOL2	46.4481	4.32122	0.533881	SHARED_vs_HAND	limb
MA0666.1	SHARED	MA0666.1	MSX1	28.535	45.736	0.533869	SHARED_vs_HAND	limb
MA0714.1	SHARED	MA0714.1	PITX3	39.887	33.3299	0.533503	SHARED_vs_HAND	limb
MA0827.1	SHARED	MA0827.1	OLIG3	38.1098	18.5033	0.531692	SHARED_vs_HAND	limb
MA0894.1	SHARED	MA0894.1	HESX1	27.0876	50.8355	0.530995	SHARED_vs_HAND	limb
MA0914.1	SHARED	MA0914.1	ISL2	35.0765	28.482	0.530554	SHARED_vs_HAND	limb
MA0648.1	SHARED	MA0648.1	GSC	40.9553	24.0586	0.530353	SHARED_vs_HAND	limb
MA0700.2	SHARED	MA0700.2	LHX2	28.0037	42.6115	0.52947	SHARED_vs_HAND	limb
MA1139.1	SHARED	MA1139.1	FOSL2::JUNB(var.2)	43.1005	7.94724	0.525821	SHARED_vs_HAND	limb
MA0668.1	SHARED	MA0668.1	NEUROD2	47.6673	18.6333	0.525522	SHARED_vs_HAND	limb
MA0137.3	SHARED	MA0137.3	STAT1	41.5129	33.4946	0.524644	SHARED_vs_HAND	limb
MA1502.1	SHARED	MA1502.1	HOXB8	30.2149	38.3974	0.524541	SHARED_vs_HAND	limb
MA0075.3	SHARED	MA0075.3	PRRX2	19.4162	43.6895	0.524463	SHARED_vs_HAND	limb
MA0819.1	SHARED	MA0819.1	CLOCK	51.9348	15.156	0.524353	SHARED_vs_HAND	limb
MA0678.1	SHARED	MA0678.1	OLIG2	37.3604	13.8412	0.523701	SHARED_vs_HAND	limb
MA0780.1	SHARED	MA0780.1	PAX3	14.4162	6.3299	0.522316	SHARED_vs_HAND	limb
MA1519.1	SHARED	MA1519.1	LHX5	19.8986	48.799	0.521767	SHARED_vs_HAND	limb
MA0833.2	SHARED	MA0833.2	ATF4	35.9534	17.8458	0.521759	SHARED_vs_HAND	limb
MA1654.1	SHARED	MA1654.1	ZNF16	54.1223	5.74565	0.520585	SHARED_vs_HAND	limb
MA0724.1	SHARED	MA0724.1	VENTX	31.6027	23.2077	0.518326	SHARED_vs_HAND	limb
MA1468.1	SHARED	MA1468.1	ATOH7	44.9644	31.3848	0.5182	SHARED_vs_HAND	limb
MA1549.1	SHARED	MA1549.1	POU6F1(var.2)	32.5534	32.6204	0.517748	SHARED_vs_HAND	limb
MA1150.1	SHARED	MA1150.1	RORB	42.076	27.9053	0.517644	SHARED_vs_HAND	limb
MA1644.1	SHARED	MA1644.1	NFYC	47.3048	19.1749	0.515512	SHARED_vs_HAND	limb
MA0153.2	SHARED	MA0153.2	HNF1B	20.3443	12.775	0.51408	SHARED_vs_HAND	limb
MA1129.1	SHARED	MA1129.1	FOSL1::JUN(var.2)	42.449	9.05081	0.514007	SHARED_vs_HAND	limb
MA0669.1	SHARED	MA0669.1	NEUROG2	39.6552	9.12595	0.513125	SHARED_vs_HAND	limb
MA0060.3	SHARED	MA0060.3	NFYA	49.0251	18.1182	0.512692	SHARED_vs_HAND	limb
MA1577.1	SHARED	MA1577.1	TLX2	20.7858	43.3088	0.51234	SHARED_vs_HAND	limb
MA1143.1	SHARED	MA1143.1	FOSL1::JUND(var.2)	44.2406	11.2711	0.511726	SHARED_vs_HAND	limb
MA0772.1	SHARED	MA0772.1	IRF7	37.3004	14.9476	0.509241	SHARED_vs_HAND	limb
MA0472.2	SHARED	MA0472.2	EGR2	74.6753	8.09332	0.507976	SHARED_vs_HAND	limb
MA0132.2	SHARED	MA0132.2	PDX1	23.6041	53.2053	0.506386	SHARED_vs_HAND	limb
MA0828.1	SHARED	MA0828.1	SREBF2(var.2)	49.4405	10.0433	0.506065	SHARED_vs_HAND	limb
MA0038.2	SHARED	MA0038.2	GFI1	44.4068	18.5116	0.505041	SHARED_vs_HAND	limb
MA1580.1	SHARED	MA1580.1	ZBTB32	34.3813	14.6593	0.504331	SHARED_vs_HAND	limb
MA0707.1	SHARED	MA0707.1	MNX1	23.4756	46.8204	0.503396	SHARED_vs_HAND	limb
MA0831.2	SHARED	MA0831.2	TFE3	57.0701	25.0256	0.502147	SHARED_vs_HAND	limb
MA0771.1	SHARED	MA0771.1	HSF4	41.7058	17.8714	0.499737	SHARED_vs_HAND	limb
MA0718.1	SHARED	MA0718.1	RAX	25.4842	40.1461	0.498277	SHARED_vs_HAND	limb
MA0506.1	SHARED	MA0506.1	NRF1	81.1408	9.29869	0.498177	SHARED_vs_HAND	limb
MA1563.1	SHARED	MA1563.1	SOX18	54.9618	10.9223	0.497239	SHARED_vs_HAND	limb
MA0077.1	SHARED	MA0077.1	SOX9	35.7548	24.2977	0.496641	SHARED_vs_HAND	limb
MA0743.2	SHARED	MA0743.2	SCRT1	48.5022	22.678	0.496094	SHARED_vs_HAND	limb
MA0692.1	SHARED	MA0692.1	TFEB	55.499	19.6542	0.495977	SHARED_vs_HAND	limb
MA0715.1	SHARED	MA0715.1	PROP1	7.77058	22.1092	0.494032	SHARED_vs_HAND	limb
MA1420.1	SHARED	MA1420.1	IRF5	48.0671	9.50467	0.493378	SHARED_vs_HAND	limb
MA1571.1	SHARED	MA1571.1	TGIF2LX	51.5718	11.3962	0.490823	SHARED_vs_HAND	limb
MA0716.1	SHARED	MA0716.1	PRRX1	21.2005	41.9188	0.489691	SHARED_vs_HAND	limb
MA1117.1	SHARED	MA1117.1	RELB	54.9074	18.2884	0.489574	SHARED_vs_HAND	limb
MA1636.1	SHARED	MA1636.1	CEBPG(var.2)	35.3061	25.63	0.488822	SHARED_vs_HAND	limb
MA1154.1	SHARED	MA1154.1	ZNF282	50.8677	4.44078	0.487895	SHARED_vs_HAND	limb
MA0710.1	SHARED	MA0710.1	NOTO	28.8325	39.8287	0.484921	SHARED_vs_HAND	limb
MA1481.1	SHARED	MA1481.1	DRGX	22.8717	40.9907	0.48252	SHARED_vs_HAND	limb
MA0609.2	SHARED	MA0609.2	CREM	53.2402	8.87316	0.482303	SHARED_vs_HAND	limb
MA0674.1	SHARED	MA0674.1	NKX6-1	19.797	40.4569	0.480959	SHARED_vs_HAND	limb
MA0632.2	SHARED	MA0632.2	TCFL5	75.3313	8.93159	0.479101	SHARED_vs_HAND	limb
MA0140.2	SHARED	MA0140.2	GATA1::TAL1	44.3252	14.5468	0.479017	SHARED_vs_HAND	limb
MA0838.1	SHARED	MA0838.1	CEBPG	42.6829	5.26698	0.477026	SHARED_vs_HAND	limb
MA1136.1	SHARED	MA1136.1	FOSB::JUNB(var.2)	43.8454	9.14622	0.476076	SHARED_vs_HAND	limb
MA0618.1	SHARED	MA0618.1	LBX1	23.731	34.8818	0.476004	SHARED_vs_HAND	limb
MA0654.1	SHARED	MA0654.1	ISX	19.8986	44.6868	0.474243	SHARED_vs_HAND	limb
MA0093.3	SHARED	MA0093.3	USF1	51.0234	18.2878	0.473464	SHARED_vs_HAND	limb
MA0145.3	SHARED	MA0145.3	TFCP2	45.6765	9.10027	0.472924	SHARED_vs_HAND	limb
MA0770.1	SHARED	MA0770.1	HSF2	36.072	9.7508	0.471569	SHARED_vs_HAND	limb
MA0035.4	SHARED	MA0035.4	GATA1	30.4833	18.8365	0.470851	SHARED_vs_HAND	limb
MA1560.1	SHARED	MA1560.1	SOHLH2	65.412	9.06435	0.470339	SHARED_vs_HAND	limb
MA1133.1	SHARED	MA1133.1	JUN::JUNB(var.2)	46.0102	11.3134	0.470276	SHARED_vs_HAND	limb
MA1507.1	SHARED	MA1507.1	HOXD4	23.9544	47.3229	0.46897	SHARED_vs_HAND	limb
MA0466.2	SHARED	MA0466.2	CEBPB	41.6497	7.49704	0.468667	SHARED_vs_HAND	limb
MA1145.1	SHARED	MA1145.1	FOSL2::JUND(var.2)	47.0428	9.92839	0.468641	SHARED_vs_HAND	limb
MA0482.2	SHARED	MA0482.2	GATA4	37.0623	29.3209	0.46864	SHARED_vs_HAND	limb
MA1131.1	SHARED	MA1131.1	FOSL2::JUN(var.2)	43.5589	11.4275	0.467047	SHARED_vs_HAND	limb
MA0829.2	SHARED	MA0829.2	SREBF1(var.2)	46.7836	19.4356	0.466982	SHARED_vs_HAND	limb
MA0037.3	SHARED	MA0037.3	GATA3	32.4461	27.8536	0.466852	SHARED_vs_HAND	limb
MA0882.1	SHARED	MA0882.1	DLX6	23.2143	44.3	0.464973	SHARED_vs_HAND	limb
MA1554.1	SHARED	MA1554.1	RFX7	53.0405	15.6449	0.464376	SHARED_vs_HAND	limb
MA0486.2	SHARED	MA0486.2	HSF1	36.9616	6.18138	0.462862	SHARED_vs_HAND	limb
MA0072.1	SHARED	MA0072.1	RORA(var.2)	36.8805	8.59807	0.460076	SHARED_vs_HAND	limb
MA0635.1	SHARED	MA0635.1	BARHL2	34.3177	17.6877	0.45856	SHARED_vs_HAND	limb
MA0046.2	SHARED	MA0046.2	HNF1A	22.29	17.2027	0.458125	SHARED_vs_HAND	limb
MA0773.1	SHARED	MA0773.1	MEF2D	22.5126	16.269	0.457306	SHARED_vs_HAND	limb
MA0069.1	SHARED	MA0069.1	PAX6	43.2945	10.3898	0.455342	SHARED_vs_HAND	limb
MA1657.1	SHARED	MA1657.1	ZNF652	32.7103	24.6655	0.455136	SHARED_vs_HAND	limb
MA0836.2	SHARED	MA0836.2	CEBPD	38.631	23.3204	0.455102	SHARED_vs_HAND	limb
MA1645.1	SHARED	MA1645.1	NKX2-2	48.9424	35.1411	0.454405	SHARED_vs_HAND	limb
MA0868.2	SHARED	MA0868.2	SOX8	35.102	32.4374	0.453599	SHARED_vs_HAND	limb
MA0711.1	SHARED	MA0711.1	OTX1	38.8041	33.3437	0.453471	SHARED_vs_HAND	limb
MA1533.1	SHARED	MA1533.1	NR1I2	53.0185	11.2083	0.45324	SHARED_vs_HAND	limb
MA1151.1	SHARED	MA1151.1	RORC	41.7657	23.2835	0.453143	SHARED_vs_HAND	limb
MA0526.3	SHARED	MA0526.3	USF2	51.4931	17.5127	0.452183	SHARED_vs_HAND	limb
MA1479.1	SHARED	MA1479.1	DMRTC2	29.4317	23.2748	0.452139	SHARED_vs_HAND	limb
MA1493.1	SHARED	MA1493.1	HES6	62.132	8.87313	0.451518	SHARED_vs_HAND	limb
MA1106.1	SHARED	MA1106.1	HIF1A	61.9675	11.6396	0.451138	SHARED_vs_HAND	limb
MA0913.2	SHARED	MA0913.2	HOXD9	25.1521	42.8078	0.448824	SHARED_vs_HAND	limb
MA0823.1	SHARED	MA0823.1	HEY1	68.8708	9.64759	0.447203	SHARED_vs_HAND	limb
MA0649.1	SHARED	MA0649.1	HEY2	67.5153	10.3279	0.447187	SHARED_vs_HAND	limb
MA0463.2	SHARED	MA0463.2	BCL6	44.8759	9.27158	0.445104	SHARED_vs_HAND	limb
MA0837.1	SHARED	MA0837.1	CEBPE	40.9969	9.94306	0.44508	SHARED_vs_HAND	limb
MA0101.1	SHARED	MA0101.1	REL	55.7927	22.158	0.444458	SHARED_vs_HAND	limb
MA0667.1	SHARED	MA0667.1	MYF6	40.3455	12.2503	0.444413	SHARED_vs_HAND	limb
MA0660.1	SHARED	MA0660.1	MEF2B	25.4008	15.6238	0.444273	SHARED_vs_HAND	limb
MA0744.2	SHARED	MA0744.2	SCRT2	49.5541	21.3684	0.444146	SHARED_vs_HAND	limb
MA1640.1	SHARED	MA1640.1	MEIS2(var.2)	30.3134	29.0746	0.443091	SHARED_vs_HAND	limb
MA0899.1	SHARED	MA0899.1	HOXA10	26.4624	51.0666	0.443031	SHARED_vs_HAND	limb
MA0107.1	SHARED	MA0107.1	RELA	56.3636	17.3049	0.441612	SHARED_vs_HAND	limb
MA0616.2	SHARED	MA0616.2	HES2	72.6348	10.0075	0.441504	SHARED_vs_HAND	limb
MA1110.1	SHARED	MA1110.1	NR1H4	45.7909	17.4462	0.441236	SHARED_vs_HAND	limb
MA1475.1	SHARED	MA1475.1	CREB3L4(var.2)	54.6383	5.54654	0.440208	SHARED_vs_HAND	limb
MA0036.3	SHARED	MA0036.3	GATA2	34.1057	26.2128	0.439189	SHARED_vs_HAND	limb
MA1499.1	SHARED	MA1499.1	HOXB4	22.9404	40.7525	0.438836	SHARED_vs_HAND	limb
MA0762.1	SHARED	MA0762.1	ETV2	46.7221	10.5256	0.438541	SHARED_vs_HAND	limb
MA0733.1	SHARED	MA0733.1	EGR4	64.0944	13.6488	0.438326	SHARED_vs_HAND	limb
MA0492.1	SHARED	MA0492.1	JUND(var.2)	39.1069	13.8884	0.436643	SHARED_vs_HAND	limb
MA0719.1	SHARED	MA0719.1	RHOXF1	44.2332	17.0203	0.436028	SHARED_vs_HAND	limb
MA1127.1	SHARED	MA1127.1	FOSB::JUN	43.8483	8.38058	0.435852	SHARED_vs_HAND	limb
MA1421.1	SHARED	MA1421.1	TCF7L1	35.1397	14.0208	0.435616	SHARED_vs_HAND	limb
MA0664.1	SHARED	MA0664.1	MLXIPL	51.3211	7.31302	0.434884	SHARED_vs_HAND	limb
MA0895.1	SHARED	MA0895.1	HMBOX1	35.5397	14.711	0.434481	SHARED_vs_HAND	limb
MA0464.2	SHARED	MA0464.2	BHLHE40	60.8122	6.39271	0.433828	SHARED_vs_HAND	limb
MA1126.1	SHARED	MA1126.1	FOS::JUN(var.2)	44.7903	12.7183	0.433261	SHARED_vs_HAND	limb
MA0043.3	SHARED	MA0043.3	HLF	33.8192	11.7924	0.432544	SHARED_vs_HAND	limb
MA0074.1	SHARED	MA0074.1	RXRA::VDR	52.4949	6.70864	0.432252	SHARED_vs_HAND	limb
MA1099.2	SHARED	MA1099.2	HES1	73.7854	10.315	0.43106	SHARED_vs_HAND	limb
MA0842.2	SHARED	MA0842.2	NRL	43.1587	11.3947	0.431036	SHARED_vs_HAND	limb
MA1528.1	SHARED	MA1528.1	NFIX(var.2)	61.7365	12.4335	0.430976	SHARED_vs_HAND	limb
MA1602.1	SHARED	MA1602.1	ZSCAN29	56.9374	4.87997	0.430522	SHARED_vs_HAND	limb
MA1476.1	SHARED	MA1476.1	DLX5	22.5888	47.0256	0.428931	SHARED_vs_HAND	limb
MA0141.3	SHARED	MA0141.3	ESRRB	42.2899	7.67733	0.428316	SHARED_vs_HAND	limb
MA0475.2	SHARED	MA0475.2	FLI1	54.4625	8.4119	0.426495	SHARED_vs_HAND	limb
MA0768.1	SHARED	MA0768.1	LEF1	35.3501	9.7508	0.425855	SHARED_vs_HAND	limb
MA0754.1	SHARED	MA0754.1	CUX1	29.5617	9.2339	0.424775	SHARED_vs_HAND	limb
MA0799.1	SHARED	MA0799.1	RFX4	49.1385	6.12188	0.424621	SHARED_vs_HAND	limb
MA1585.1	SHARED	MA1585.1	ZKSCAN1	46.4975	12.5305	0.424616	SHARED_vs_HAND	limb
MA1504.1	SHARED	MA1504.1	HOXC4	25.1899	42.7861	0.42418	SHARED_vs_HAND	limb
MA0161.2	SHARED	MA0161.2	NFIC	52.5534	15.4183	0.423676	SHARED_vs_HAND	limb
MA1593.1	SHARED	MA1593.1	ZNF317	45.9574	33.9647	0.423649	SHARED_vs_HAND	limb
MA0740.1	SHARED	MA0740.1	KLF14	68.7727	10.9234	0.423124	SHARED_vs_HAND	limb
MA0712.2	SHARED	MA0712.2	OTX2	38.7097	36.7687	0.423005	SHARED_vs_HAND	limb
MA0841.1	SHARED	MA0841.1	NFE2	42.2263	4.16876	0.421957	SHARED_vs_HAND	limb
MA0713.1	SHARED	MA0713.1	PHOX2A	15.7553	24.0342	0.420859	SHARED_vs_HAND	limb
MA0798.2	SHARED	MA0798.2	RFX3	52.7697	14.5026	0.420361	SHARED_vs_HAND	limb
MA0672.1	SHARED	MA0672.1	NKX2-3	47.8217	32.7226	0.420233	SHARED_vs_HAND	limb
MA0488.1	SHARED	MA0488.1	JUN	38.0469	14.6498	0.419643	SHARED_vs_HAND	limb
MA0755.1	SHARED	MA0755.1	CUX2	27.6531	7.9146	0.419382	SHARED_vs_HAND	limb
MA0147.3	SHARED	MA0147.3	MYC	66.9499	12.9024	0.419289	SHARED_vs_HAND	limb
MA1464.1	SHARED	MA1464.1	ARNT2	60.4675	7.49023	0.418893	SHARED_vs_HAND	limb
MA0595.1	SHARED	MA0595.1	SREBF1	57.0265	25.8368	0.418393	SHARED_vs_HAND	limb
MA1562.1	SHARED	MA1562.1	SOX14	41.0987	9.59488	0.41773	SHARED_vs_HAND	limb
MA0647.1	SHARED	MA0647.1	GRHL1	39.5586	8.37022	0.417722	SHARED_vs_HAND	limb
MA1120.1	SHARED	MA1120.1	SOX13	40.8163	28.2885	0.417116	SHARED_vs_HAND	limb
MA0058.3	SHARED	MA0058.3	MAX	60.6707	10.0338	0.415847	SHARED_vs_HAND	limb
MA1647.1	SHARED	MA1647.1	PRDM4	42.6716	34.851	0.41558	SHARED_vs_HAND	limb
MA0025.2	SHARED	MA0025.2	NFIL3	29.1438	18.022	0.415452	SHARED_vs_HAND	limb
MA0051.1	SHARED	MA0051.1	IRF2	41.5959	10.0654	0.414932	SHARED_vs_HAND	limb
MA1480.1	SHARED	MA1480.1	DPRX	39.7762	13.229	0.414888	SHARED_vs_HAND	limb
MA1597.1	SHARED	MA1597.1	ZNF528	55.9159	5.22197	0.41293	SHARED_vs_HAND	limb
MA1530.1	SHARED	MA1530.1	NKX6-3	29.4582	27.3415	0.412506	SHARED_vs_HAND	limb
MA1572.1	SHARED	MA1572.1	TGIF2LY	51.147	9.48814	0.412448	SHARED_vs_HAND	limb
MA1536.1	SHARED	MA1536.1	NR2C2(var.2)	54.0609	17.2944	0.412342	SHARED_vs_HAND	limb
MA0502.2	SHARED	MA0502.2	NFYB	57.6041	16.2709	0.41233	SHARED_vs_HAND	limb
MA0155.1	SHARED	MA0155.1	INSM1	66.5526	22.7964	0.412058	SHARED_vs_HAND	limb
MA0059.1	SHARED	MA0059.1	MAX::MYC	60.0186	9.82576	0.411881	SHARED_vs_HAND	limb
MA0679.2	SHARED	MA0679.2	ONECUT1	23.3078	22.2795	0.411874	SHARED_vs_HAND	limb
MA0524.2	SHARED	MA0524.2	TFAP2C	72.449	20.0839	0.411207	SHARED_vs_HAND	limb
MA0465.2	SHARED	MA0465.2	CDX2	28.887	39.9225	0.410464	SHARED_vs_HAND	limb
MA0825.1	SHARED	MA0825.1	MNT	60.1015	9.72537	0.410074	SHARED_vs_HAND	limb
MA0143.4	SHARED	MA0143.4	SOX2	37.4421	25.2689	0.408845	SHARED_vs_HAND	limb
MA0056.2	SHARED	MA0056.2	MZF1	51.8025	23.4545	0.408568	SHARED_vs_HAND	limb
MA0811.1	SHARED	MA0811.1	TFAP2B	72.6887	20.4261	0.408434	SHARED_vs_HAND	limb
MA0517.1	SHARED	MA0517.1	STAT1::STAT2	37.0421	31.0119	0.407813	SHARED_vs_HAND	limb
MA0102.4	SHARED	MA0102.4	CEBPA	35.2256	20.6941	0.407298	SHARED_vs_HAND	limb
MA0071.1	SHARED	MA0071.1	RORA	42.5051	23.0604	0.407125	SHARED_vs_HAND	limb
MA0057.1	SHARED	MA0057.1	MZF1(var.2)	58.4008	28.0257	0.406986	SHARED_vs_HAND	limb
MA1483.1	SHARED	MA1483.1	ELF2	54.6531	4.89827	0.40665	SHARED_vs_HAND	limb
MA1570.1	SHARED	MA1570.1	TFAP4(var.2)	43.3503	21.085	0.406151	SHARED_vs_HAND	limb
MA0767.1	SHARED	MA0767.1	GCM2	61.0601	11.6576	0.405999	SHARED_vs_HAND	limb
MA0682.2	SHARED	MA0682.2	PITX1	38.9873	36.6303	0.404523	SHARED_vs_HAND	limb
MA1524.1	SHARED	MA1524.1	MSGN1	49.7036	21.8226	0.404014	SHARED_vs_HAND	limb
MA1113.2	SHARED	MA1113.2	PBX2	27.2799	26.8836	0.403049	SHARED_vs_HAND	limb
MA0782.2	SHARED	MA0782.2	PKNOX1	49.0476	22.9783	0.402671	SHARED_vs_HAND	limb
MA1471.1	SHARED	MA1471.1	BARX2	24.5331	37.3234	0.402599	SHARED_vs_HAND	limb
MA1467.1	SHARED	MA1467.1	ATOH1(var.2)	52.6849	22.107	0.401284	SHARED_vs_HAND	limb
MA0160.1	SHARED	MA0160.1	NR4A2	49.2366	28.3877	0.400626	SHARED_vs_HAND	limb
MA1588.1	SHARED	MA1588.1	ZNF136	39.741	7.83432	0.400528	SHARED_vs_HAND	limb
MA1134.1	SHARED	MA1134.1	FOS::JUNB	42.9297	16.2415	0.399148	SHARED_vs_HAND	limb
MA1547.1	SHARED	MA1547.1	PITX2	37.4684	38.3974	0.398598	SHARED_vs_HAND	limb
MA1148.1	SHARED	MA1148.1	PPARA::RXRA	46.1234	19.7233	0.398008	SHARED_vs_HAND	limb
MA0095.2	SHARED	MA0095.2	YY1	52.6718	23.3155	0.396736	SHARED_vs_HAND	limb
MA0698.1	SHARED	MA0698.1	ZBTB18	45.7031	17.7704	0.396714	SHARED_vs_HAND	limb
MA1568.1	SHARED	MA1568.1	TCF21(var.2)	49.2373	9.69562	0.396377	SHARED_vs_HAND	limb
MA0474.2	SHARED	MA0474.2	ERG	54.0102	12.3826	0.395246	SHARED_vs_HAND	limb
MA0498.2	SHARED	MA0498.2	MEIS1	45.1379	18.2915	0.39359	SHARED_vs_HAND	limb
MA0157.2	SHARED	MA0157.2	FOXO3	26.2357	13.764	0.393257	SHARED_vs_HAND	limb
MA1146.1	SHARED	MA1146.1	NR1H4::RXRA	52.3422	9.30983	0.392908	SHARED_vs_HAND	limb
MA0901.2	SHARED	MA0901.2	HOXB13	23.0825	49.7185	0.390951	SHARED_vs_HAND	limb
MA1532.1	SHARED	MA1532.1	NR1D2	50.1355	14.2322	0.390298	SHARED_vs_HAND	limb
MA0084.1	SHARED	MA0084.1	SRY	24.0363	31.0072	0.390272	SHARED_vs_HAND	limb
MA0810.1	SHARED	MA0810.1	TFAP2A(var.2)	75.2332	20.8377	0.390096	SHARED_vs_HAND	limb
MA1537.1	SHARED	MA1537.1	NR2F1(var.2)	50.8141	4.09943	0.389682	SHARED_vs_HAND	limb
MA0778.1	SHARED	MA0778.1	NFKB2	67.0837	7.14293	0.389557	SHARED_vs_HAND	limb
MA0683.1	SHARED	MA0683.1	POU4F2	23.3121	5.22197	0.388551	SHARED_vs_HAND	limb
MA0523.1	SHARED	MA0523.1	TCF7L2	39.6514	26.3924	0.388477	SHARED_vs_HAND	limb
MA1561.1	SHARED	MA1561.1	SOX12	44.0333	7.39724	0.388453	SHARED_vs_HAND	limb
MA0613.1	SHARED	MA0613.1	FOXG1	22.3767	18.7068	0.387891	SHARED_vs_HAND	limb
MA1523.1	SHARED	MA1523.1	MSANTD3	51.222	20.5816	0.387462	SHARED_vs_HAND	limb
MA0090.3	SHARED	MA0090.3	TEAD1	46.2687	28.1484	0.387017	SHARED_vs_HAND	limb
MA0507.1	SHARED	MA0507.1	POU2F2	28.6943	18.7993	0.386068	SHARED_vs_HAND	limb
MA0791.1	SHARED	MA0791.1	POU4F3	24.5379	22.7493	0.385321	SHARED_vs_HAND	limb
MA0138.2	SHARED	MA0138.2	REST	59.7472	4.29957	0.384947	SHARED_vs_HAND	limb
MA1478.1	SHARED	MA1478.1	DMRTA2	34.8639	19.5634	0.384946	SHARED_vs_HAND	limb
MA1118.1	SHARED	MA1118.1	SIX1	40.9091	14.5482	0.38473	SHARED_vs_HAND	limb
MA1122.1	SHARED	MA1122.1	TFDP1	71.0306	8.95352	0.384646	SHARED_vs_HAND	limb
MA1512.1	SHARED	MA1512.1	KLF11	75.0923	21.3283	0.383604	SHARED_vs_HAND	limb
MA1516.1	SHARED	MA1516.1	KLF3	77.634	14.7506	0.38044	SHARED_vs_HAND	limb
MA0508.3	SHARED	MA0508.3	PRDM1	41.7593	30.6817	0.37998	SHARED_vs_HAND	limb
MA1104.2	SHARED	MA1104.2	GATA6	30.8176	19.5858	0.379326	SHARED_vs_HAND	limb
MA0673.1	SHARED	MA0673.1	NKX2-8	47.9143	23.0283	0.378552	SHARED_vs_HAND	limb
MA0645.1	SHARED	MA0645.1	ETV6	57.5788	14.9358	0.377314	SHARED_vs_HAND	limb
MA0786.1	SHARED	MA0786.1	POU3F1	22.1374	28.8533	0.376945	SHARED_vs_HAND	limb
MA1600.1	SHARED	MA1600.1	ZNF684	54.4734	4.59919	0.376832	SHARED_vs_HAND	limb
MA0687.1	SHARED	MA0687.1	SPIC	40.9848	24.9808	0.376797	SHARED_vs_HAND	limb
MA0079.4	SHARED	MA0079.4	SP1	69.5122	5.91171	0.375876	SHARED_vs_HAND	limb
MA0513.1	SHARED	MA0513.1	SMAD2::SMAD3::SMAD4	55.5991	26.9029	0.374889	SHARED_vs_HAND	limb
MA0830.2	SHARED	MA0830.2	TCF4	66.143	34.7473	0.374702	SHARED_vs_HAND	limb
MA0790.1	SHARED	MA0790.1	POU4F1	20.8879	23.9147	0.374368	SHARED_vs_HAND	limb
MA1542.1	SHARED	MA1542.1	OSR1	53.6585	12.7452	0.374073	SHARED_vs_HAND	limb
MA1138.1	SHARED	MA1138.1	FOSL2::JUNB	40.081	16.7001	0.37375	SHARED_vs_HAND	limb
MA1105.2	SHARED	MA1105.2	GRHL2	41.1915	20.8916	0.37339	SHARED_vs_HAND	limb
MA0031.1	SHARED	MA0031.1	FOXD1	27.5418	8.46292	0.373329	SHARED_vs_HAND	limb
MA1114.1	SHARED	MA1114.1	PBX3	53.3893	20.5565	0.371977	SHARED_vs_HAND	limb
MA0736.1	SHARED	MA0736.1	GLIS2	75.4895	4.97088	0.371713	SHARED_vs_HAND	limb
MA0162.4	SHARED	MA0162.4	EGR1	75.4909	17.6644	0.371422	SHARED_vs_HAND	limb
MA1534.1	SHARED	MA1534.1	NR1I3	33.6712	21.171	0.371355	SHARED_vs_HAND	limb
MA0610.1	SHARED	MA0610.1	DMRT3	34.1667	17.0092	0.371241	SHARED_vs_HAND	limb
MA0509.2	SHARED	MA0509.2	RFX1	49.3071	12.5781	0.370808	SHARED_vs_HAND	limb
MA0747.1	SHARED	MA0747.1	SP8	70.5433	26.4528	0.370563	SHARED_vs_HAND	limb
MA1119.1	SHARED	MA1119.1	SIX2	42.5478	15.8015	0.36999	SHARED_vs_HAND	limb
MA0156.2	SHARED	MA0156.2	FEV	54.2218	7.62595	0.369797	SHARED_vs_HAND	limb
MA1655.1	SHARED	MA1655.1	ZNF341	57.0943	22.1161	0.369596	SHARED_vs_HAND	limb
MA0479.1	SHARED	MA0479.1	FOXH1	40.1843	18.6594	0.369142	SHARED_vs_HAND	limb
MA1540.1	SHARED	MA1540.1	NR5A1	55.0832	22.1564	0.368775	SHARED_vs_HAND	limb
MA0646.1	SHARED	MA0646.1	GCM1	62.037	7.74241	0.368749	SHARED_vs_HAND	limb
MA1559.1	SHARED	MA1559.1	SNAI3	56.8528	25.2353	0.368114	SHARED_vs_HAND	limb
MA1121.1	SHARED	MA1121.1	TEAD2	47.0173	26.0348	0.367989	SHARED_vs_HAND	limb
MA0738.1	SHARED	MA0738.1	HIC2	63.2054	26.5963	0.367475	SHARED_vs_HAND	limb
MA1108.2	SHARED	MA1108.2	MXI1	51.5244	42.1866	0.367406	SHARED_vs_HAND	limb
MA0144.2	SHARED	MA0144.2	STAT3	43.675	36.4746	0.367204	SHARED_vs_HAND	limb
MA1111.1	SHARED	MA1111.1	NR2F2	43.3488	19.0704	0.366494	SHARED_vs_HAND	limb
MA1650.1	SHARED	MA1650.1	ZBTB14	81.3084	7.37928	0.366419	SHARED_vs_HAND	limb
MA1144.1	SHARED	MA1144.1	FOSL2::JUND	41.3374	16.0132	0.366153	SHARED_vs_HAND	limb
MA0499.2	SHARED	MA0499.2	MYOD1	58.9159	28.8261	0.365904	SHARED_vs_HAND	limb
MA1485.1	SHARED	MA1485.1	FERD3L	59.3455	4.38453	0.365831	SHARED_vs_HAND	limb
MA0760.1	SHARED	MA0760.1	ERF	54.3235	7.14294	0.365659	SHARED_vs_HAND	limb
MA0691.1	SHARED	MA0691.1	TFAP4	46.599	10.849	0.36551	SHARED_vs_HAND	limb
MA1529.1	SHARED	MA1529.1	NHLH2	68.0045	5.77125	0.365341	SHARED_vs_HAND	limb
MA0495.3	SHARED	MA0495.3	MAFF	38.0831	19.1815	0.365259	SHARED_vs_HAND	limb
MA1574.1	SHARED	MA1574.1	THRB	52.0353	9.41316	0.363875	SHARED_vs_HAND	limb
MA0745.2	SHARED	MA0745.2	SNAI2	56.4465	24.3052	0.363438	SHARED_vs_HAND	limb
MA0091.1	SHARED	MA0091.1	TAL1::TCF3	45.3311	13.4427	0.362688	SHARED_vs_HAND	limb
MA1135.1	SHARED	MA1135.1	FOSB::JUNB	41.0987	15.9522	0.36261	SHARED_vs_HAND	limb
MA0809.2	SHARED	MA0809.2	TEAD4	43.9252	29.7918	0.361069	SHARED_vs_HAND	limb
MA0018.4	SHARED	MA0018.4	CREB1	42.2624	18.1365	0.360908	SHARED_vs_HAND	limb
MA0131.2	SHARED	MA0131.2	HINFP	72.6503	5.91973	0.360554	SHARED_vs_HAND	limb
MA0788.1	SHARED	MA0788.1	POU3F3	20.1258	22.3377	0.359673	SHARED_vs_HAND	limb
MA0787.1	SHARED	MA0787.1	POU3F2	21.9492	18.8053	0.358976	SHARED_vs_HAND	limb
MA1123.2	SHARED	MA1123.2	TWIST1	48.8226	28.2043	0.358927	SHARED_vs_HAND	limb
MA1142.1	SHARED	MA1142.1	FOSL1::JUND	39.7358	14.7559	0.358727	SHARED_vs_HAND	limb
MA1149.1	SHARED	MA1149.1	RARA::RXRG	55.2036	13.3197	0.358707	SHARED_vs_HAND	limb
MA0114.4	SHARED	MA0114.4	HNF4A	45.712	17.8956	0.3587	SHARED_vs_HAND	limb
MA0596.1	SHARED	MA0596.1	SREBF2	54.0347	18.9165	0.357969	SHARED_vs_HAND	limb
MA0693.2	SHARED	MA0693.2	VDR	41.8367	29.6901	0.357347	SHARED_vs_HAND	limb
MA1141.1	SHARED	MA1141.1	FOS::JUND	44.7307	15.4905	0.357177	SHARED_vs_HAND	limb
MA0797.1	SHARED	MA0797.1	TGIF2	48.855	4.2763	0.357167	SHARED_vs_HAND	limb
MA1491.1	SHARED	MA1491.1	GLI3	66.9377	9.30059	0.356461	SHARED_vs_HAND	limb
MA0154.4	SHARED	MA0154.4	EBF1	64.0572	17.9905	0.356218	SHARED_vs_HAND	limb
MA1147.1	SHARED	MA1147.1	NR4A2::RXRA	56.7255	6.32089	0.356076	SHARED_vs_HAND	limb
MA0689.1	SHARED	MA0689.1	TBX20	43.0157	14.6092	0.355599	SHARED_vs_HAND	limb
MA0098.3	SHARED	MA0098.3	ETS1	54.6748	9.91094	0.355407	SHARED_vs_HAND	limb
MA0484.2	SHARED	MA0484.2	HNF4G	46.202	17.595	0.355312	SHARED_vs_HAND	limb
MA1649.1	SHARED	MA1649.1	ZBTB12	51.1606	13.5686	0.354456	SHARED_vs_HAND	limb
MA0774.1	SHARED	MA0774.1	MEIS2	50.5089	20.8344	0.353698	SHARED_vs_HAND	limb
MA1569.1	SHARED	MA1569.1	TFAP2E	79.2244	16.3925	0.353282	SHARED_vs_HAND	limb
MA0471.2	SHARED	MA0471.2	E2F6	68.2602	24.4653	0.35306	SHARED_vs_HAND	limb
MA0089.2	SHARED	MA0089.2	NFE2L1	44.232	6.44599	0.353031	SHARED_vs_HAND	limb
MA0659.2	SHARED	MA0659.2	MAFG	40.0409	18.9347	0.353029	SHARED_vs_HAND	limb
MA0163.1	SHARED	MA0163.1	PLAG1	78.7988	11.7396	0.352931	SHARED_vs_HAND	limb
MA0259.1	SHARED	MA0259.1	ARNT::HIF1A	65.8196	9.5755	0.352736	SHARED_vs_HAND	limb
MA1631.1	SHARED	MA1631.1	ASCL1(var.2)	65.7255	28.3709	0.351715	SHARED_vs_HAND	limb
MA0516.2	SHARED	MA0516.2	SP2	65.9472	8.61017	0.351427	SHARED_vs_HAND	limb
MA0775.1	SHARED	MA0775.1	MEIS3	48.1576	20.8327	0.351014	SHARED_vs_HAND	limb
MA1601.1	SHARED	MA1601.1	ZNF75D	52.8993	27.1886	0.350914	SHARED_vs_HAND	limb
MA0504.1	SHARED	MA0504.1	NR2C2	58.9952	12.9143	0.349942	SHARED_vs_HAND	limb
MA1520.1	SHARED	MA1520.1	MAF	49.83	7.96226	0.349898	SHARED_vs_HAND	limb
MA0099.3	SHARED	MA0099.3	FOS::JUN	41.4634	16.5803	0.349343	SHARED_vs_HAND	limb
MA0808.1	SHARED	MA0808.1	TEAD3	44.3038	25.4405	0.348336	SHARED_vs_HAND	limb
MA1484.1	SHARED	MA1484.1	ETS2	59.1278	6.72914	0.347852	SHARED_vs_HAND	limb
MA0852.2	SHARED	MA0852.2	FOXK1	38.5569	21.8036	0.347785	SHARED_vs_HAND	limb
MA0789.1	SHARED	MA0789.1	POU3F4	21.3394	14.9567	0.347708	SHARED_vs_HAND	limb
MA0048.2	SHARED	MA0048.2	NHLH1	68.4584	16.5547	0.347282	SHARED_vs_HAND	limb
MA1521.1	SHARED	MA1521.1	MAFA	54.0082	7.54957	0.347254	SHARED_vs_HAND	limb
MA1128.1	SHARED	MA1128.1	FOSL1::JUN	43.0479	16.7468	0.346778	SHARED_vs_HAND	limb
MA0681.2	SHARED	MA0681.2	PHOX2B	15.0606	23.1412	0.34627	SHARED_vs_HAND	limb
MA1581.1	SHARED	MA1581.1	ZBTB6	60.7227	24.0597	0.345793	SHARED_vs_HAND	limb
MA1109.1	SHARED	MA1109.1	NEUROD1	54.1601	21.7177	0.345672	SHARED_vs_HAND	limb
MA1633.1	SHARED	MA1633.1	BACH1	50.4334	14.1591	0.345271	SHARED_vs_HAND	limb
MA0627.2	SHARED	MA0627.2	POU2F3	28.0345	21.2511	0.345208	SHARED_vs_HAND	limb
MA0592.3	SHARED	MA0592.3	ESRRA	49.2549	15.7735	0.343806	SHARED_vs_HAND	limb
MA0100.3	SHARED	MA0100.3	MYB	50.1526	23.2951	0.343462	SHARED_vs_HAND	limb
MA1130.1	SHARED	MA1130.1	FOSL2::JUN	43.1239	16.2687	0.342928	SHARED_vs_HAND	limb
MA0496.3	SHARED	MA0496.3	MAFK	50.5442	24.116	0.342696	SHARED_vs_HAND	limb
MA1137.1	SHARED	MA1137.1	FOSL1::JUNB	41.9937	15.5416	0.342084	SHARED_vs_HAND	limb
MA0655.1	SHARED	MA0655.1	JDP2	36.036	6.43099	0.341843	SHARED_vs_HAND	limb
MA0136.2	SHARED	MA0136.2	ELF5	51.105	24.4451	0.341087	SHARED_vs_HAND	limb
MA0792.1	SHARED	MA0792.1	POU5F1B	21.9955	22.0761	0.340867	SHARED_vs_HAND	limb
MA1599.1	SHARED	MA1599.1	ZNF682	65.2451	12.5184	0.340437	SHARED_vs_HAND	limb
MA0763.1	SHARED	MA0763.1	ETV3	54.527	6.04376	0.339986	SHARED_vs_HAND	limb
MA1553.1	SHARED	MA1553.1	RARG(var.3)	50.5095	4.03381	0.339716	SHARED_vs_HAND	limb
MA0741.1	SHARED	MA0741.1	KLF16	78.9474	18.9877	0.339661	SHARED_vs_HAND	limb
MA1112.2	SHARED	MA1112.2	NR4A1	40.102	22.3883	0.33965	SHARED_vs_HAND	limb
MA0522.3	SHARED	MA0522.3	TCF3	66.7285	15.1311	0.339091	SHARED_vs_HAND	limb
MA1652.1	SHARED	MA1652.1	ZKSCAN5	54.7636	25.9946	0.338574	SHARED_vs_HAND	limb
MA1525.1	SHARED	MA1525.1	NFATC4	40.2229	32.6322	0.338209	SHARED_vs_HAND	limb
MA1642.1	SHARED	MA1642.1	NEUROG2(var.2)	52.4333	24.4009	0.338197	SHARED_vs_HAND	limb
MA1656.1	SHARED	MA1656.1	ZNF449	60.6856	16.3557	0.337382	SHARED_vs_HAND	limb
MA0872.1	SHARED	MA0872.1	TFAP2A(var.3)	76.5442	8.95623	0.337295	SHARED_vs_HAND	limb
MA0784.1	SHARED	MA0784.1	POU1F1	24.6905	14.711	0.337104	SHARED_vs_HAND	limb
MA0813.1	SHARED	MA0813.1	TFAP2B(var.3)	73.9437	8.92619	0.337058	SHARED_vs_HAND	limb
MA0148.4	SHARED	MA0148.4	FOXA1	29.5319	25.1223	0.336498	SHARED_vs_HAND	limb
MA0746.2	SHARED	MA0746.2	SP3	74.7459	14.0368	0.336134	SHARED_vs_HAND	limb
MA1639.1	SHARED	MA1639.1	MEIS1(var.2)	31.6863	12.5416	0.334959	SHARED_vs_HAND	limb
MA0030.1	SHARED	MA0030.1	FOXF2	34.2125	12.7424	0.334876	SHARED_vs_HAND	limb
MA1552.1	SHARED	MA1552.1	RARB(var.3)	53.5714	4.0224	0.334792	SHARED_vs_HAND	limb
MA0104.4	SHARED	MA0104.4	MYCN	68.4746	6.52085	0.334642	SHARED_vs_HAND	limb
MA1555.1	SHARED	MA1555.1	RXRB(var.2)	58.1514	4.37988	0.334208	SHARED_vs_HAND	limb
MA0442.2	SHARED	MA0442.2	SOX10	38.8323	36.168	0.33389	SHARED_vs_HAND	limb
MA0845.1	SHARED	MA0845.1	FOXB1	18.721	26.8296	0.33385	SHARED_vs_HAND	limb
MA0769.2	SHARED	MA0769.2	TCF7	37.164	22.5361	0.332501	SHARED_vs_HAND	limb
MA0050.2	SHARED	MA0050.2	IRF1	35.5588	30.441	0.332488	SHARED_vs_HAND	limb
MA1487.1	SHARED	MA1487.1	FOXE1	29.4396	8.99279	0.331321	SHARED_vs_HAND	limb
MA0017.2	SHARED	MA0017.2	NR2F1	53.3958	22.4158	0.331161	SHARED_vs_HAND	limb
MA1637.1	SHARED	MA1637.1	EBF3	64.1287	16.2073	0.331018	SHARED_vs_HAND	limb
MA0528.2	SHARED	MA0528.2	ZNF263	67.4339	23.6416	0.330723	SHARED_vs_HAND	limb
MA0070.1	SHARED	MA0070.1	PBX1	31.53	9.04716	0.330115	SHARED_vs_HAND	limb
MA0491.2	SHARED	MA0491.2	JUND	39.8585	11.5808	0.330057	SHARED_vs_HAND	limb
MA0812.1	SHARED	MA0812.1	TFAP2B(var.2)	73.1054	11.3698	0.32998	SHARED_vs_HAND	limb
MA0820.1	SHARED	MA0820.1	FIGLA	54.4898	33.4739	0.328811	SHARED_vs_HAND	limb
MA0477.2	SHARED	MA0477.2	FOSL1	41.7125	12.9545	0.32839	SHARED_vs_HAND	limb
MA0800.1	SHARED	MA0800.1	EOMES	42.79	16.6483	0.328389	SHARED_vs_HAND	limb
MA0080.5	SHARED	MA0080.5	SPI1	42.7769	36.9062	0.328238	SHARED_vs_HAND	limb
MA1648.1	SHARED	MA1648.1	TCF12(var.2)	66.3889	13.9453	0.32806	SHARED_vs_HAND	limb
MA0489.1	SHARED	MA0489.1	JUN(var.2)	42.547	13.6997	0.327519	SHARED_vs_HAND	limb
MA0047.3	SHARED	MA0047.3	FOXA2	29.5097	20.1005	0.326932	SHARED_vs_HAND	limb
MA0734.2	SHARED	MA0734.2	GLI2	66.9607	5.1988	0.325712	SHARED_vs_HAND	limb
MA0478.1	SHARED	MA0478.1	FOSL2	47.6937	13.6156	0.325253	SHARED_vs_HAND	limb
MA1632.1	SHARED	MA1632.1	ATF2	41.4118	11.8799	0.325244	SHARED_vs_HAND	limb
MA0850.1	SHARED	MA0850.1	FOXP3	29.0276	17.801	0.324593	SHARED_vs_HAND	limb
MA1132.1	SHARED	MA1132.1	JUN::JUNB	42.5662	13.0964	0.324568	SHARED_vs_HAND	limb
MA1641.1	SHARED	MA1641.1	MYF5	55.7627	14.6245	0.324068	SHARED_vs_HAND	limb
MA1558.1	SHARED	MA1558.1	SNAI1	59.7152	27.292	0.323006	SHARED_vs_HAND	limb
MA1100.2	SHARED	MA1100.2	ASCL1	63.313	22.0468	0.322751	SHARED_vs_HAND	limb
MA0847.2	SHARED	MA0847.2	FOXD2	27.1306	23.239	0.321467	SHARED_vs_HAND	limb
MA1107.2	SHARED	MA1107.2	KLF9	66.3903	23.9508	0.320959	SHARED_vs_HAND	limb
MA0625.1	SHARED	MA0625.1	NFATC3	37.9065	32.0435	0.320697	SHARED_vs_HAND	limb
MA0501.1	SHARED	MA0501.1	MAF::NFE2	42.8765	5.91085	0.320638	SHARED_vs_HAND	limb
MA0751.1	SHARED	MA0751.1	ZIC4	72.3014	8.85143	0.320325	SHARED_vs_HAND	limb
MA0697.1	SHARED	MA0697.1	ZIC3	75.848	4.911	0.319716	SHARED_vs_HAND	limb
MA1683.1	SHARED	MA1683.1	FOXA3	31.3544	20.2019	0.319512	SHARED_vs_HAND	limb
MA0476.1	SHARED	MA0476.1	FOS	42.2899	12.7108	0.319507	SHARED_vs_HAND	limb
MA1596.1	SHARED	MA1596.1	ZNF460	74.5223	18.7734	0.319402	SHARED_vs_HAND	limb
MA1514.1	SHARED	MA1514.1	KLF17	65.7609	9.99482	0.318583	SHARED_vs_HAND	limb
MA1522.1	SHARED	MA1522.1	MAZ	78.8745	14.6439	0.318425	SHARED_vs_HAND	limb
MA1579.1	SHARED	MA1579.1	ZBTB26	47.1826	28.8107	0.317695	SHARED_vs_HAND	limb
MA0490.2	SHARED	MA0490.2	JUNB	38.5647	11.8687	0.316373	SHARED_vs_HAND	limb
MA0003.4	SHARED	MA0003.4	TFAP2A	65.9606	23.587	0.316268	SHARED_vs_HAND	limb
MA0785.1	SHARED	MA0785.1	POU2F1	24.5106	18.1069	0.316095	SHARED_vs_HAND	limb
MA1102.2	SHARED	MA1102.2	CTCFL	78.6078	15.0547	0.315736	SHARED_vs_HAND	limb
MA0765.2	SHARED	MA0765.2	ETV5	59.1837	11.165	0.315678	SHARED_vs_HAND	limb
MA1646.1	SHARED	MA1646.1	OSR2	51.9182	23.3622	0.315154	SHARED_vs_HAND	limb
MA1517.1	SHARED	MA1517.1	KLF6	71.0988	18.5849	0.315074	SHARED_vs_HAND	limb
MA1635.1	SHARED	MA1635.1	BHLHE22(var.2)	64.503	23.9795	0.314874	SHARED_vs_HAND	limb
MA0815.1	SHARED	MA0815.1	TFAP2C(var.3)	76.6224	6.93606	0.314638	SHARED_vs_HAND	limb
MA0814.2	SHARED	MA0814.2	TFAP2C(var.2)	70.1308	22.7277	0.314005	SHARED_vs_HAND	limb
MA0500.2	SHARED	MA0500.2	MYOG	59.5238	18.1426	0.313009	SHARED_vs_HAND	limb
MA0014.3	SHARED	MA0014.3	PAX5	64.5408	8.47041	0.31274	SHARED_vs_HAND	limb
MA1474.1	SHARED	MA1474.1	CREB3L4	60.2716	5.54736	0.311083	SHARED_vs_HAND	limb
MA0159.1	SHARED	MA0159.1	RARA::RXRA	53.4411	9.57332	0.30972	SHARED_vs_HAND	limb
MA1103.2	SHARED	MA1103.2	FOXK2	32.4699	18.2074	0.309545	SHARED_vs_HAND	limb
MA0103.3	SHARED	MA0103.3	ZEB1	65.2739	35.1742	0.306614	SHARED_vs_HAND	limb
MA0803.1	SHARED	MA0803.1	TBX15	50.7024	18.6578	0.305873	SHARED_vs_HAND	limb
MA0671.1	SHARED	MA0671.1	NFIX	57.1267	17.8563	0.304653	SHARED_vs_HAND	limb
MA1472.1	SHARED	MA1472.1	BHLHA15(var.2)	54.842	21.2	0.303531	SHARED_vs_HAND	limb
MA0684.2	SHARED	MA0684.2	RUNX3	43.6224	21.0046	0.303151	SHARED_vs_HAND	limb
MA0258.2	SHARED	MA0258.2	ESR2	58.2597	12.6867	0.302043	SHARED_vs_HAND	limb
MA1578.1	SHARED	MA1578.1	VEZF1	77.2819	12.2861	0.301316	SHARED_vs_HAND	limb
MA0073.1	SHARED	MA0073.1	RREB1	61.676	14.2516	0.300022	SHARED_vs_HAND	limb
MA1513.1	SHARED	MA1513.1	KLF15	90.4982	5.97129	0.300003	SHARED_vs_HAND	limb
MA1511.1	SHARED	MA1511.1	KLF10	71.5605	15.5972	0.299909	SHARED_vs_HAND	limb
MA0076.2	SHARED	MA0076.2	ELK4	63.0996	9.61869	0.299735	SHARED_vs_HAND	limb
MA0802.1	SHARED	MA0802.1	TBR1	42.5662	13.7038	0.298967	SHARED_vs_HAND	limb
MA1152.1	SHARED	MA1152.1	SOX15	30.7614	39.0524	0.296242	SHARED_vs_HAND	limb
MA0597.1	SHARED	MA0597.1	THAP1	60.7223	6.86344	0.295376	SHARED_vs_HAND	limb
MA0598.3	SHARED	MA0598.3	EHF	47.9266	25.3291	0.294962	SHARED_vs_HAND	limb
MA0665.1	SHARED	MA0665.1	MSC	46.1851	8.5889	0.293766	SHARED_vs_HAND	limb
MA0806.1	SHARED	MA0806.1	TBX4	49.6823	18.7332	0.293335	SHARED_vs_HAND	limb
MA0462.2	SHARED	MA0462.2	BATF::JUN	38.197	13.0639	0.292698	SHARED_vs_HAND	limb
MA0593.1	SHARED	MA0593.1	FOXP2	30.4788	20.3095	0.29174	SHARED_vs_HAND	limb
MA0081.2	SHARED	MA0081.2	SPIB	46.1292	20.3444	0.291355	SHARED_vs_HAND	limb
MA1548.1	SHARED	MA1548.1	PLAGL2	83.8742	9.56769	0.289949	SHARED_vs_HAND	limb
MA1515.1	SHARED	MA1515.1	KLF2	73.3766	19.024	0.289544	SHARED_vs_HAND	limb
MA0152.1	SHARED	MA0152.1	NFATC2	34.7953	33.0188	0.289223	SHARED_vs_HAND	limb
MA1541.1	SHARED	MA1541.1	NR6A1	46.5548	6.58835	0.288894	SHARED_vs_HAND	limb
MA0759.1	SHARED	MA0759.1	ELK3	55.646	4.0993	0.288183	SHARED_vs_HAND	limb
MA1564.1	SHARED	MA1564.1	SP9	74.1277	14.9808	0.287832	SHARED_vs_HAND	limb
MA0599.1	SHARED	MA0599.1	KLF5	79.4742	27.5929	0.287785	SHARED_vs_HAND	limb
MA1566.1	SHARED	MA1566.1	TBX3	57.1138	10.8646	0.287248	SHARED_vs_HAND	limb
MA1587.1	SHARED	MA1587.1	ZNF135	64.1867	14.29	0.285969	SHARED_vs_HAND	limb
MA0473.3	SHARED	MA0473.3	ELF1	52	20.6144	0.285934	SHARED_vs_HAND	limb
MA0801.1	SHARED	MA0801.1	MGA	51.465	18.2896	0.28562	SHARED_vs_HAND	limb
MA0688.1	SHARED	MA0688.1	TBX2	43.9408	15.3628	0.285456	SHARED_vs_HAND	limb
MA1638.1	SHARED	MA1638.1	HAND2	52.1783	29.2735	0.285167	SHARED_vs_HAND	limb
MA1535.1	SHARED	MA1535.1	NR2C1	58.0135	28.3975	0.283661	SHARED_vs_HAND	limb
MA0805.1	SHARED	MA0805.1	TBX1	48.9848	14.3279	0.283645	SHARED_vs_HAND	limb
MA0867.2	SHARED	MA0867.2	SOX4	40.2041	29.1005	0.282799	SHARED_vs_HAND	limb
MA1634.1	SHARED	MA1634.1	BATF	38.0334	12.3923	0.282202	SHARED_vs_HAND	limb
MA0032.2	SHARED	MA0032.2	FOXC1	19.87	27.7011	0.28193	SHARED_vs_HAND	limb
MA0670.1	SHARED	MA0670.1	NFIA	49.3401	23.9035	0.279899	SHARED_vs_HAND	limb
MA1115.1	SHARED	MA1115.1	POU5F1	30.0186	19.6354	0.279365	SHARED_vs_HAND	limb
MA0807.1	SHARED	MA0807.1	TBX5	52.6048	13.6059	0.278491	SHARED_vs_HAND	limb
MA1567.1	SHARED	MA1567.1	TBX6	51.3706	13.7657	0.277876	SHARED_vs_HAND	limb
MA1565.1	SHARED	MA1565.1	TBX18	50.5932	18.4027	0.277414	SHARED_vs_HAND	limb
MA0062.3	SHARED	MA0062.3	GABPA	50.4727	22.0468	0.276803	SHARED_vs_HAND	limb
MA0481.3	SHARED	MA0481.3	FOXP1	30.2412	16.6229	0.276519	SHARED_vs_HAND	limb
MA1508.1	SHARED	MA1508.1	IKZF1	44.8217	32.7226	0.274561	SHARED_vs_HAND	limb
MA0761.2	SHARED	MA0761.2	ETV1	49.7817	21.6937	0.273843	SHARED_vs_HAND	limb
MA0753.2	SHARED	MA0753.2	ZNF740	79.8589	9.10027	0.273251	SHARED_vs_HAND	limb
MA0690.1	SHARED	MA0690.1	TBX21	42.9009	9.7517	0.272019	SHARED_vs_HAND	limb
MA0695.1	SHARED	MA0695.1	ZBTB7C	64.7359	8.53679	0.269831	SHARED_vs_HAND	limb
MA0849.1	SHARED	MA0849.1	FOXO6	27.7457	16.3513	0.268507	SHARED_vs_HAND	limb
MA0640.2	SHARED	MA0640.2	ELF3	50.3282	23.6949	0.267781	SHARED_vs_HAND	limb
MA0052.4	SHARED	MA0052.4	MEF2A	25.2553	34.3013	0.266094	SHARED_vs_HAND	limb
MA0497.1	SHARED	MA0497.1	MEF2C	27.7665	27.0674	0.265845	SHARED_vs_HAND	limb
MA0835.2	SHARED	MA0835.2	BATF3	36.3383	11.3942	0.264209	SHARED_vs_HAND	limb
MA0511.2	SHARED	MA0511.2	RUNX2	50	8.4626	0.262301	SHARED_vs_HAND	limb
MA1653.1	SHARED	MA1653.1	ZNF148	81.3084	14.4754	0.261512	SHARED_vs_HAND	limb
MA0750.2	SHARED	MA0750.2	ZBTB7A	65.2038	8.02143	0.259842	SHARED_vs_HAND	limb
MA0694.1	SHARED	MA0694.1	ZBTB7B	65.1695	4.78782	0.259197	SHARED_vs_HAND	limb
MA1651.1	SHARED	MA1651.1	ZFP42	52.8412	5.30241	0.254482	SHARED_vs_HAND	limb
MA0846.1	SHARED	MA0846.1	FOXC2	22.7504	28.4722	0.254302	SHARED_vs_HAND	limb
MA1116.1	SHARED	MA1116.1	RBPJ	52.9412	32.4387	0.250833	SHARED_vs_HAND	limb
MA1125.1	SHARED	MA1125.1	ZNF384	15.1055	33.6844	0.248041	SHARED_vs_HAND	limb
MA0033.2	SHARED	MA0033.2	FOXL1	22.1739	24.2941	0.247189	SHARED_vs_HAND	limb
MA0039.4	SHARED	MA0039.4	KLF4	73.3844	18.9391	0.239782	SHARED_vs_HAND	limb
MA0764.2	SHARED	MA0764.2	ETV4	53.3469	32.4132	0.239263	SHARED_vs_HAND	limb
MA0042.2	SHARED	MA0042.2	FOXI1	26.3081	16.269	0.227024	SHARED_vs_HAND	limb
MA0848.1	SHARED	MA0848.1	FOXO4	26.6376	16.269	0.227024	SHARED_vs_HAND	limb
MA1518.1	BOTH_REGIONS	MA1518.1	LHX1	32.2293	10.8354	1.25536	BOTH_REGIONS_vs_METAPODIAL	REGION
MA0083.3	BOTH_REGIONS	MA0083.3	SRF	41.8147	5.3698	0.896509	BOTH_REGIONS_vs_METAPODIAL	REGION
MA0906.1	BOTH_REGIONS	MA0906.1	HOXC12	33.7937	29.5001	0.885828	BOTH_REGIONS_vs_METAPODIAL	REGION
MA0112.3	BOTH_REGIONS	MA0112.3	ESR1	56.3506	4.96865	0.880586	BOTH_REGIONS_vs_METAPODIAL	REGION
MA0780.1	BOTH_REGIONS	MA0780.1	PAX3	14.4162	12.6947	0.870585	BOTH_REGIONS_vs_METAPODIAL	REGION
MA0865.1	BOTH_REGIONS	MA0865.1	E2F8	50.5485	8.17334	0.846006	BOTH_REGIONS_vs_METAPODIAL	REGION
MA0115.1	BOTH_REGIONS	MA0115.1	NR1H2::RXRA	44.4982	6.16208	0.805062	BOTH_REGIONS_vs_METAPODIAL	REGION
MA0873.1	BOTH_REGIONS	MA0873.1	HOXD12	33.6716	21.6317	0.794861	BOTH_REGIONS_vs_METAPODIAL	REGION
MA0485.2	BOTH_REGIONS	MA0485.2	HOXC9	32.0526	25.4422	0.782441	BOTH_REGIONS_vs_METAPODIAL	REGION
MA0907.1	BOTH_REGIONS	MA0907.1	HOXC13	35.2778	37.101	0.776831	BOTH_REGIONS_vs_METAPODIAL	REGION
MA1594.1	BOTH_REGIONS	MA1594.1	ZNF382	48.9371	4.31581	0.771854	BOTH_REGIONS_vs_METAPODIAL	REGION
MA1466.1	BOTH_REGIONS	MA1466.1	ATF6	57.7342	4.30441	0.767429	BOTH_REGIONS_vs_METAPODIAL	REGION
MA0757.1	BOTH_REGIONS	MA0757.1	ONECUT3	19.0407	25.9381	0.745064	BOTH_REGIONS_vs_METAPODIAL	REGION
MA1506.1	BOTH_REGIONS	MA1506.1	HOXD10	34.5304	20.6526	0.742589	BOTH_REGIONS_vs_METAPODIAL	REGION
MA1503.1	BOTH_REGIONS	MA1503.1	HOXB9	31.2373	27.9967	0.73717	BOTH_REGIONS_vs_METAPODIAL	REGION
MA0594.2	BOTH_REGIONS	MA0594.2	HOXA9	40.6728	7.55835	0.737142	BOTH_REGIONS_vs_METAPODIAL	REGION
MA1557.1	BOTH_REGIONS	MA1557.1	SMAD5	50.3067	10.301	0.730747	BOTH_REGIONS_vs_METAPODIAL	REGION
MA0826.1	BOTH_REGIONS	MA0826.1	OLIG1	34.0771	10.9969	0.729506	BOTH_REGIONS_vs_METAPODIAL	REGION
MA0822.1	BOTH_REGIONS	MA0822.1	HES7	72.827	8.4093	0.728524	BOTH_REGIONS_vs_METAPODIAL	REGION
MA1527.1	BOTH_REGIONS	MA1527.1	NFIC(var.2)	60.5499	12.8653	0.727889	BOTH_REGIONS_vs_METAPODIAL	REGION
MA0863.1	BOTH_REGIONS	MA0863.1	MTF1	57.9942	8.55174	0.725721	BOTH_REGIONS_vs_METAPODIAL	REGION
MA0651.1	BOTH_REGIONS	MA0651.1	HOXC11	33.4566	28.3603	0.719409	BOTH_REGIONS_vs_METAPODIAL	REGION
MA0892.1	BOTH_REGIONS	MA0892.1	GSX1	30.683	19.0241	0.712061	BOTH_REGIONS_vs_METAPODIAL	REGION
MA0669.1	BOTH_REGIONS	MA0669.1	NEUROG2	39.6552	15.3187	0.710925	BOTH_REGIONS_vs_METAPODIAL	REGION
MA1136.1	BOTH_REGIONS	MA1136.1	FOSB::JUNB(var.2)	43.8454	17.7028	0.710332	BOTH_REGIONS_vs_METAPODIAL	REGION
MA1505.1	BOTH_REGIONS	MA1505.1	HOXC8	27.5032	18.3136	0.704788	BOTH_REGIONS_vs_METAPODIAL	REGION
MA0756.1	BOTH_REGIONS	MA0756.1	ONECUT2	23.2169	19.7445	0.702152	BOTH_REGIONS_vs_METAPODIAL	REGION
MA1139.1	BOTH_REGIONS	MA1139.1	FOSL2::JUNB(var.2)	43.1005	12.5068	0.697944	BOTH_REGIONS_vs_METAPODIAL	REGION
MA1129.1	BOTH_REGIONS	MA1129.1	FOSL1::JUN(var.2)	42.449	14.768	0.695762	BOTH_REGIONS_vs_METAPODIAL	REGION
MA0106.3	BOTH_REGIONS	MA0106.3	TP53	52.6256	4.56436	0.692168	BOTH_REGIONS_vs_METAPODIAL	REGION
MA0642.1	BOTH_REGIONS	MA0642.1	EN2	38.634	30.6512	0.691755	BOTH_REGIONS_vs_METAPODIAL	REGION
MA0468.1	BOTH_REGIONS	MA0468.1	DUX4	23.7351	27.7561	0.690271	BOTH_REGIONS_vs_METAPODIAL	REGION
MA0088.2	BOTH_REGIONS	MA0088.2	ZNF143	49.4617	5.07276	0.682855	BOTH_REGIONS_vs_METAPODIAL	REGION
MA1537.1	BOTH_REGIONS	MA1537.1	NR2F1(var.2)	50.8141	11.612	0.677454	BOTH_REGIONS_vs_METAPODIAL	REGION
MA0794.1	BOTH_REGIONS	MA0794.1	PROX1	46.2384	7.43131	0.677338	BOTH_REGIONS_vs_METAPODIAL	REGION
MA0793.1	BOTH_REGIONS	MA0793.1	POU6F2	28.5132	44.0274	0.671342	BOTH_REGIONS_vs_METAPODIAL	REGION
MA0703.2	BOTH_REGIONS	MA0703.2	LMX1B	12.0849	28.3114	0.664382	BOTH_REGIONS_vs_METAPODIAL	REGION
MA0878.2	BOTH_REGIONS	MA0878.2	CDX1	34.8666	31.6951	0.664037	BOTH_REGIONS_vs_METAPODIAL	REGION
MA1418.1	BOTH_REGIONS	MA1418.1	IRF3	45.8111	5.58051	0.662661	BOTH_REGIONS_vs_METAPODIAL	REGION
MA0149.1	BOTH_REGIONS	MA0149.1	EWSR1-FLI1	55.4494	6.24022	0.661015	BOTH_REGIONS_vs_METAPODIAL	REGION
MA0650.2	BOTH_REGIONS	MA0650.2	HOXA13	34.3173	33.2672	0.655089	BOTH_REGIONS_vs_METAPODIAL	REGION
MA0630.1	BOTH_REGIONS	MA0630.1	SHOX	22.293	24.9767	0.648858	BOTH_REGIONS_vs_METAPODIAL	REGION
MA0623.2	BOTH_REGIONS	MA0623.2	NEUROG1	40.4883	10.827	0.6486	BOTH_REGIONS_vs_METAPODIAL	REGION
MA1539.1	BOTH_REGIONS	MA1539.1	NR2F6(var.3)	53.144	4.38461	0.645165	BOTH_REGIONS_vs_METAPODIAL	REGION
MA1538.1	BOTH_REGIONS	MA1538.1	NR2F1(var.3)	53.893	8.67597	0.645027	BOTH_REGIONS_vs_METAPODIAL	REGION
MA0795.1	BOTH_REGIONS	MA0795.1	SMAD3	46.9512	6.45499	0.643441	BOTH_REGIONS_vs_METAPODIAL	REGION
MA0680.1	BOTH_REGIONS	MA0680.1	PAX7	15.3455	5.85346	0.643111	BOTH_REGIONS_vs_METAPODIAL	REGION
MA0817.1	BOTH_REGIONS	MA0817.1	BHLHE23	34.3486	8.76311	0.642963	BOTH_REGIONS_vs_METAPODIAL	REGION
MA0138.2	BOTH_REGIONS	MA0138.2	REST	59.7472	11.6007	0.641794	BOTH_REGIONS_vs_METAPODIAL	REGION
MA0821.1	BOTH_REGIONS	MA0821.1	HES5	70.3046	4.29899	0.641311	BOTH_REGIONS_vs_METAPODIAL	REGION
MA1473.1	BOTH_REGIONS	MA1473.1	CDX4	31.7972	39.2826	0.639942	BOTH_REGIONS_vs_METAPODIAL	REGION
MA0527.1	BOTH_REGIONS	MA0527.1	ZBTB33	61.1413	6.67628	0.639324	BOTH_REGIONS_vs_METAPODIAL	REGION
MA1545.1	BOTH_REGIONS	MA1545.1	OVOL2	46.4481	5.93929	0.63827	BOTH_REGIONS_vs_METAPODIAL	REGION
MA0675.1	BOTH_REGIONS	MA0675.1	NKX6-2	22.6752	35.7819	0.638191	BOTH_REGIONS_vs_METAPODIAL	REGION
MA0656.1	BOTH_REGIONS	MA0656.1	JDP2(var.2)	48.2671	4.20708	0.637472	BOTH_REGIONS_vs_METAPODIAL	REGION
MA0887.1	BOTH_REGIONS	MA0887.1	EVX1	34.3177	19.9695	0.63554	BOTH_REGIONS_vs_METAPODIAL	REGION
MA0895.1	BOTH_REGIONS	MA0895.1	HMBOX1	35.5397	25.7711	0.635369	BOTH_REGIONS_vs_METAPODIAL	REGION
MA0843.1	BOTH_REGIONS	MA0843.1	TEF	30.906	8.3449	0.634858	BOTH_REGIONS_vs_METAPODIAL	REGION
MA0024.3	BOTH_REGIONS	MA0024.3	E2F1	58.1001	6.61498	0.634821	BOTH_REGIONS_vs_METAPODIAL	REGION
MA1495.1	BOTH_REGIONS	MA1495.1	HOXA1	28.9708	18.4051	0.631799	BOTH_REGIONS_vs_METAPODIAL	REGION
MA0605.2	BOTH_REGIONS	MA0605.2	ATF3	49.5784	4.02846	0.630673	BOTH_REGIONS_vs_METAPODIAL	REGION
MA0910.2	BOTH_REGIONS	MA0910.2	HOXD8	31.519	37.7142	0.628041	BOTH_REGIONS_vs_METAPODIAL	REGION
MA1580.1	BOTH_REGIONS	MA1580.1	ZBTB32	34.3813	19.2964	0.626677	BOTH_REGIONS_vs_METAPODIAL	REGION
MA0662.1	BOTH_REGIONS	MA0662.1	MIXL1	28.8776	29.2321	0.626044	BOTH_REGIONS_vs_METAPODIAL	REGION
MA0904.2	BOTH_REGIONS	MA0904.2	HOXB5	29.4043	25.8725	0.624083	BOTH_REGIONS_vs_METAPODIAL	REGION
MA0888.1	BOTH_REGIONS	MA0888.1	EVX2	34.0793	21.0341	0.623533	BOTH_REGIONS_vs_METAPODIAL	REGION
MA0634.1	BOTH_REGIONS	MA0634.1	ALX3	27.0961	33.8381	0.622037	BOTH_REGIONS_vs_METAPODIAL	REGION
MA0153.2	BOTH_REGIONS	MA0153.2	HNF1B	20.3443	15.4712	0.620523	BOTH_REGIONS_vs_METAPODIAL	REGION
MA0908.1	BOTH_REGIONS	MA0908.1	HOXD11	28.1377	36.2962	0.620292	BOTH_REGIONS_vs_METAPODIAL	REGION
MA0475.2	BOTH_REGIONS	MA0475.2	FLI1	54.4625	17.1872	0.620116	BOTH_REGIONS_vs_METAPODIAL	REGION
MA0510.2	BOTH_REGIONS	MA0510.2	RFX5	51.1791	4.64444	0.619802	BOTH_REGIONS_vs_METAPODIAL	REGION
MA0068.2	BOTH_REGIONS	MA0068.2	PAX4	24.7776	26.5712	0.619052	BOTH_REGIONS_vs_METAPODIAL	REGION
MA0721.1	BOTH_REGIONS	MA0721.1	UNCX	22.9008	28.9019	0.618632	BOTH_REGIONS_vs_METAPODIAL	REGION
MA1497.1	BOTH_REGIONS	MA1497.1	HOXA6	34.7208	15.6857	0.618449	BOTH_REGIONS_vs_METAPODIAL	REGION
MA1549.1	BOTH_REGIONS	MA1549.1	POU6F1(var.2)	32.5534	37.0303	0.618143	BOTH_REGIONS_vs_METAPODIAL	REGION
MA0818.1	BOTH_REGIONS	MA0818.1	BHLHE22	39.5727	11.8277	0.61777	BOTH_REGIONS_vs_METAPODIAL	REGION
MA0715.1	BOTH_REGIONS	MA0715.1	PROP1	7.77058	27.2696	0.617469	BOTH_REGIONS_vs_METAPODIAL	REGION
MA1131.1	BOTH_REGIONS	MA1131.1	FOSL2::JUN(var.2)	43.5589	18.0472	0.616287	BOTH_REGIONS_vs_METAPODIAL	REGION
MA0463.2	BOTH_REGIONS	MA0463.2	BCL6	44.8759	15.196	0.615856	BOTH_REGIONS_vs_METAPODIAL	REGION
MA0875.1	BOTH_REGIONS	MA0875.1	BARX1	29.9873	37.4225	0.61564	BOTH_REGIONS_vs_METAPODIAL	REGION
MA0783.1	BOTH_REGIONS	MA0783.1	PKNOX2	49.4515	5.03042	0.615326	BOTH_REGIONS_vs_METAPODIAL	REGION
MA1146.1	BOTH_REGIONS	MA1146.1	NR1H4::RXRA	52.3422	20.9616	0.613442	BOTH_REGIONS_vs_METAPODIAL	REGION
MA1501.1	BOTH_REGIONS	MA1501.1	HOXB7	35.4315	31.1283	0.613408	BOTH_REGIONS_vs_METAPODIAL	REGION
MA1563.1	BOTH_REGIONS	MA1563.1	SOX18	54.9618	15.4969	0.61229	BOTH_REGIONS_vs_METAPODIAL	REGION
MA0877.2	BOTH_REGIONS	MA0877.2	BARHL1	36.5019	5.37156	0.611974	BOTH_REGIONS_vs_METAPODIAL	REGION
MA0077.1	BOTH_REGIONS	MA0077.1	SOX9	35.7548	31.3323	0.610888	BOTH_REGIONS_vs_METAPODIAL	REGION
MA0644.1	BOTH_REGIONS	MA0644.1	ESX1	30.0102	27.3002	0.610174	BOTH_REGIONS_vs_METAPODIAL	REGION
MA0051.1	BOTH_REGIONS	MA0051.1	IRF2	41.5959	18.0344	0.60988	BOTH_REGIONS_vs_METAPODIAL	REGION
MA0909.2	BOTH_REGIONS	MA0909.2	HOXD13	40.8088	18.3874	0.608333	BOTH_REGIONS_vs_METAPODIAL	REGION
MA0772.1	BOTH_REGIONS	MA0772.1	IRF7	37.3004	18.2274	0.606442	BOTH_REGIONS_vs_METAPODIAL	REGION
MA0876.1	BOTH_REGIONS	MA0876.1	BSX	31.0038	33.3715	0.60622	BOTH_REGIONS_vs_METAPODIAL	REGION
MA0717.1	BOTH_REGIONS	MA0717.1	RAX2	24.6173	27.0602	0.605543	BOTH_REGIONS_vs_METAPODIAL	REGION
MA0722.1	BOTH_REGIONS	MA0722.1	VAX1	23.8217	26.1467	0.604489	BOTH_REGIONS_vs_METAPODIAL	REGION
MA0725.1	BOTH_REGIONS	MA0725.1	VSX1	21.4013	26.1467	0.604489	BOTH_REGIONS_vs_METAPODIAL	REGION
MA0639.1	BOTH_REGIONS	MA0639.1	DBP	31.4721	10.1698	0.604193	BOTH_REGIONS_vs_METAPODIAL	REGION
MA1475.1	BOTH_REGIONS	MA1475.1	CREB3L4(var.2)	54.6383	10.0363	0.601114	BOTH_REGIONS_vs_METAPODIAL	REGION
MA0902.2	BOTH_REGIONS	MA0902.2	HOXB2	29.9873	35.8558	0.600548	BOTH_REGIONS_vs_METAPODIAL	REGION
MA0905.1	BOTH_REGIONS	MA0905.1	HOXC10	28.3249	38.2698	0.600342	BOTH_REGIONS_vs_METAPODIAL	REGION
MA0636.1	BOTH_REGIONS	MA0636.1	BHLHE41	58.8235	4.30989	0.598076	BOTH_REGIONS_vs_METAPODIAL	REGION
MA0699.1	BOTH_REGIONS	MA0699.1	LBX2	32.7551	23.5294	0.597496	BOTH_REGIONS_vs_METAPODIAL	REGION
MA0726.1	BOTH_REGIONS	MA0726.1	VSX2	20.6633	27.6292	0.597102	BOTH_REGIONS_vs_METAPODIAL	REGION
MA0141.3	BOTH_REGIONS	MA0141.3	ESRRB	42.2899	13.3331	0.591242	BOTH_REGIONS_vs_METAPODIAL	REGION
MA1588.1	BOTH_REGIONS	MA1588.1	ZNF136	39.741	14.8275	0.591235	BOTH_REGIONS_vs_METAPODIAL	REGION
MA0158.2	BOTH_REGIONS	MA0158.2	HOXA5	32.0659	32.7933	0.590261	BOTH_REGIONS_vs_METAPODIAL	REGION
MA0702.2	BOTH_REGIONS	MA0702.2	LMX1A	11.0127	28.8726	0.589325	BOTH_REGIONS_vs_METAPODIAL	REGION
MA0755.1	BOTH_REGIONS	MA0755.1	CUX2	27.6531	12.6511	0.587292	BOTH_REGIONS_vs_METAPODIAL	REGION
MA0891.1	BOTH_REGIONS	MA0891.1	GSC2	39.8167	20.9701	0.585176	BOTH_REGIONS_vs_METAPODIAL	REGION
MA1155.1	BOTH_REGIONS	MA1155.1	ZSCAN4	47.6351	6.09941	0.584209	BOTH_REGIONS_vs_METAPODIAL	REGION
MA1145.1	BOTH_REGIONS	MA1145.1	FOSL2::JUND(var.2)	47.0428	14.1979	0.583651	BOTH_REGIONS_vs_METAPODIAL	REGION
MA0009.2	BOTH_REGIONS	MA0009.2	TBXT	46.7218	4.4314	0.582883	BOTH_REGIONS_vs_METAPODIAL	REGION
MA0612.2	BOTH_REGIONS	MA0612.2	EMX1	23.1646	33.5409	0.58282	BOTH_REGIONS_vs_METAPODIAL	REGION
MA1498.1	BOTH_REGIONS	MA1498.1	HOXA7	31.8528	33.0229	0.582605	BOTH_REGIONS_vs_METAPODIAL	REGION
MA1500.1	BOTH_REGIONS	MA1500.1	HOXB6	31.0433	28.5908	0.581352	BOTH_REGIONS_vs_METAPODIAL	REGION
MA0063.2	BOTH_REGIONS	MA0063.2	NKX2-5	43.7732	29.5888	0.581091	BOTH_REGIONS_vs_METAPODIAL	REGION
MA0736.1	BOTH_REGIONS	MA0736.1	GLIS2	75.4895	12.3584	0.580985	BOTH_REGIONS_vs_METAPODIAL	REGION
MA0706.1	BOTH_REGIONS	MA0706.1	MEOX2	30.9184	22.6605	0.580823	BOTH_REGIONS_vs_METAPODIAL	REGION
MA0797.1	BOTH_REGIONS	MA0797.1	TGIF2	48.855	10.0433	0.578568	BOTH_REGIONS_vs_METAPODIAL	REGION
MA0701.2	BOTH_REGIONS	MA0701.2	LHX9	22.2503	28.7005	0.577296	BOTH_REGIONS_vs_METAPODIAL	REGION
MA0886.1	BOTH_REGIONS	MA0886.1	EMX2	29.2089	30.5638	0.577283	BOTH_REGIONS_vs_METAPODIAL	REGION
MA1561.1	BOTH_REGIONS	MA1561.1	SOX12	44.0333	14.3831	0.576699	BOTH_REGIONS_vs_METAPODIAL	REGION
MA0723.1	BOTH_REGIONS	MA0723.1	VAX2	25.54	29.2614	0.576114	BOTH_REGIONS_vs_METAPODIAL	REGION
MA0661.1	BOTH_REGIONS	MA0661.1	MEOX1	32.0082	29.5962	0.575231	BOTH_REGIONS_vs_METAPODIAL	REGION
MA0861.1	BOTH_REGIONS	MA0861.1	TP73	48.953	7.63437	0.57508	BOTH_REGIONS_vs_METAPODIAL	REGION
MA0912.2	BOTH_REGIONS	MA0912.2	HOXD3	25.4753	29.2897	0.574839	BOTH_REGIONS_vs_METAPODIAL	REGION
MA0768.1	BOTH_REGIONS	MA0768.1	LEF1	35.3501	15.4986	0.574122	BOTH_REGIONS_vs_METAPODIAL	REGION
MA0658.1	BOTH_REGIONS	MA0658.1	LHX6	27.5407	21.5171	0.573112	BOTH_REGIONS_vs_METAPODIAL	REGION
MA0668.1	BOTH_REGIONS	MA0668.1	NEUROD2	47.6673	19.7182	0.572954	BOTH_REGIONS_vs_METAPODIAL	REGION
MA0833.2	BOTH_REGIONS	MA0833.2	ATF4	35.9534	19.4758	0.572758	BOTH_REGIONS_vs_METAPODIAL	REGION
MA1575.1	BOTH_REGIONS	MA1575.1	THRB(var.2)	54.1555	8.21047	0.572516	BOTH_REGIONS_vs_METAPODIAL	REGION
MA0732.1	BOTH_REGIONS	MA0732.1	EGR3	69.5799	7.16362	0.571696	BOTH_REGIONS_vs_METAPODIAL	REGION
MA0648.1	BOTH_REGIONS	MA0648.1	GSC	40.9553	26.2924	0.56852	BOTH_REGIONS_vs_METAPODIAL	REGION
MA0839.1	BOTH_REGIONS	MA0839.1	CREB3L1	57.3401	6.14154	0.567923	BOTH_REGIONS_vs_METAPODIAL	REGION
MA0027.2	BOTH_REGIONS	MA0027.2	EN1	25	36.3772	0.566797	BOTH_REGIONS_vs_METAPODIAL	REGION
MA0754.1	BOTH_REGIONS	MA0754.1	CUX1	29.5617	13.751	0.566376	BOTH_REGIONS_vs_METAPODIAL	REGION
MA1546.1	BOTH_REGIONS	MA1546.1	PAX3(var.2)	47.7403	6.94462	0.566121	BOTH_REGIONS_vs_METAPODIAL	REGION
MA0903.1	BOTH_REGIONS	MA0903.1	HOXB3	30.5102	26.6594	0.5661	BOTH_REGIONS_vs_METAPODIAL	REGION
MA1143.1	BOTH_REGIONS	MA1143.1	FOSL1::JUND(var.2)	44.2406	12.723	0.565972	BOTH_REGIONS_vs_METAPODIAL	REGION
MA0884.1	BOTH_REGIONS	MA0884.1	DUXA	29.8742	26.8287	0.564843	BOTH_REGIONS_vs_METAPODIAL	REGION
MA1502.1	BOTH_REGIONS	MA1502.1	HOXB8	30.2149	36.8521	0.563449	BOTH_REGIONS_vs_METAPODIAL	REGION
MA0799.1	BOTH_REGIONS	MA0799.1	RFX4	49.1385	9.90243	0.563101	BOTH_REGIONS_vs_METAPODIAL	REGION
MA1124.1	BOTH_REGIONS	MA1124.1	ZNF24	31.9466	20.7666	0.561136	BOTH_REGIONS_vs_METAPODIAL	REGION
MA0893.2	BOTH_REGIONS	MA0893.2	GSX2	31.385	33.8512	0.561034	BOTH_REGIONS_vs_METAPODIAL	REGION
MA0678.1	BOTH_REGIONS	MA0678.1	OLIG2	37.3604	13.4437	0.560125	BOTH_REGIONS_vs_METAPODIAL	REGION
MA1420.1	BOTH_REGIONS	MA1420.1	IRF5	48.0671	11.2426	0.559369	BOTH_REGIONS_vs_METAPODIAL	REGION
MA0719.1	BOTH_REGIONS	MA0719.1	RHOXF1	44.2332	24.8756	0.557194	BOTH_REGIONS_vs_METAPODIAL	REGION
MA1493.1	BOTH_REGIONS	MA1493.1	HES6	62.132	13.6102	0.556974	BOTH_REGIONS_vs_METAPODIAL	REGION
MA0713.1	BOTH_REGIONS	MA0713.1	PHOX2A	15.7553	32.5047	0.556526	BOTH_REGIONS_vs_METAPODIAL	REGION
MA1463.1	BOTH_REGIONS	MA1463.1	ARGFX	20	28.1066	0.55588	BOTH_REGIONS_vs_METAPODIAL	REGION
MA0145.3	BOTH_REGIONS	MA0145.3	TFCP2	45.6765	11.7689	0.555674	BOTH_REGIONS_vs_METAPODIAL	REGION
MA0700.2	BOTH_REGIONS	MA0700.2	LHX2	28.0037	38.1403	0.554916	BOTH_REGIONS_vs_METAPODIAL	REGION
MA0819.1	BOTH_REGIONS	MA0819.1	CLOCK	51.9348	16.9401	0.553958	BOTH_REGIONS_vs_METAPODIAL	REGION
MA0638.1	BOTH_REGIONS	MA0638.1	CREB3	56.0816	6.14179	0.548085	BOTH_REGIONS_vs_METAPODIAL	REGION
MA0140.2	BOTH_REGIONS	MA0140.2	GATA1::TAL1	44.3252	17.6742	0.54682	BOTH_REGIONS_vs_METAPODIAL	REGION
MA1589.1	BOTH_REGIONS	MA1589.1	ZNF140	50.3887	6.25879	0.546191	BOTH_REGIONS_vs_METAPODIAL	REGION
MA0609.2	BOTH_REGIONS	MA0609.2	CREM	53.2402	11.3751	0.546163	BOTH_REGIONS_vs_METAPODIAL	REGION
MA1484.1	BOTH_REGIONS	MA1484.1	ETS2	59.1278	16.2493	0.544557	BOTH_REGIONS_vs_METAPODIAL	REGION
MA1483.1	BOTH_REGIONS	MA1483.1	ELF2	54.6531	8.5917	0.542303	BOTH_REGIONS_vs_METAPODIAL	REGION
MA0038.2	BOTH_REGIONS	MA0038.2	GFI1	44.4068	20.661	0.542126	BOTH_REGIONS_vs_METAPODIAL	REGION
MA0632.2	BOTH_REGIONS	MA0632.2	TCFL5	75.3313	12.5989	0.54082	BOTH_REGIONS_vs_METAPODIAL	REGION
MA0647.1	BOTH_REGIONS	MA0647.1	GRHL1	39.5586	12.4752	0.540417	BOTH_REGIONS_vs_METAPODIAL	REGION
MA0737.1	BOTH_REGIONS	MA0737.1	GLIS3	68.2643	4.19997	0.540271	BOTH_REGIONS_vs_METAPODIAL	REGION
MA1562.1	BOTH_REGIONS	MA1562.1	SOX14	41.0987	13.9874	0.538683	BOTH_REGIONS_vs_METAPODIAL	REGION
MA0743.2	BOTH_REGIONS	MA0743.2	SCRT1	48.5022	25.8658	0.538665	BOTH_REGIONS_vs_METAPODIAL	REGION
MA0889.1	BOTH_REGIONS	MA0889.1	GBX1	31.8737	28.1151	0.53794	BOTH_REGIONS_vs_METAPODIAL	REGION
MA1127.1	BOTH_REGIONS	MA1127.1	FOSB::JUN	43.8483	11.6361	0.536512	BOTH_REGIONS_vs_METAPODIAL	REGION
MA1577.1	BOTH_REGIONS	MA1577.1	TLX2	20.7858	37.6161	0.535866	BOTH_REGIONS_vs_METAPODIAL	REGION
MA0646.1	BOTH_REGIONS	MA0646.1	GCM1	62.037	15.9814	0.534296	BOTH_REGIONS_vs_METAPODIAL	REGION
MA0618.1	BOTH_REGIONS	MA0618.1	LBX1	23.731	34.5653	0.533628	BOTH_REGIONS_vs_METAPODIAL	REGION
MA0708.1	BOTH_REGIONS	MA0708.1	MSX2	26.3024	37.5728	0.533572	BOTH_REGIONS_vs_METAPODIAL	REGION
MA0666.1	BOTH_REGIONS	MA0666.1	MSX1	28.535	36.9326	0.533518	BOTH_REGIONS_vs_METAPODIAL	REGION
MA0046.2	BOTH_REGIONS	MA0046.2	HNF1A	22.29	19.5116	0.532526	BOTH_REGIONS_vs_METAPODIAL	REGION
MA0836.2	BOTH_REGIONS	MA0836.2	CEBPD	38.631	28.2537	0.531533	BOTH_REGIONS_vs_METAPODIAL	REGION
MA0628.1	BOTH_REGIONS	MA0628.1	POU6F1	20.5703	17.6286	0.531464	BOTH_REGIONS_vs_METAPODIAL	REGION
MA0771.1	BOTH_REGIONS	MA0771.1	HSF4	41.7058	19.1296	0.530016	BOTH_REGIONS_vs_METAPODIAL	REGION
MA0844.1	BOTH_REGIONS	MA0844.1	XBP1	52.689	5.41562	0.529653	BOTH_REGIONS_vs_METAPODIAL	REGION
MA1600.1	BOTH_REGIONS	MA1600.1	ZNF684	54.4734	8.30212	0.529307	BOTH_REGIONS_vs_METAPODIAL	REGION
MA1554.1	BOTH_REGIONS	MA1554.1	RFX7	53.0405	19.275	0.52911	BOTH_REGIONS_vs_METAPODIAL	REGION
MA0770.1	BOTH_REGIONS	MA0770.1	HSF2	36.072	11.5693	0.528788	BOTH_REGIONS_vs_METAPODIAL	REGION
MA1147.1	BOTH_REGIONS	MA1147.1	NR4A2::RXRA	56.7255	13.1771	0.528312	BOTH_REGIONS_vs_METAPODIAL	REGION
MA0075.3	BOTH_REGIONS	MA0075.3	PRRX2	19.4162	35.8025	0.528108	BOTH_REGIONS_vs_METAPODIAL	REGION
MA0710.1	BOTH_REGIONS	MA0710.1	NOTO	28.8325	37.0658	0.527803	BOTH_REGIONS_vs_METAPODIAL	REGION
MA0804.1	BOTH_REGIONS	MA0804.1	TBX19	43.0464	5.23557	0.527178	BOTH_REGIONS_vs_METAPODIAL	REGION
MA0043.3	BOTH_REGIONS	MA0043.3	HLF	33.8192	14.8193	0.526915	BOTH_REGIONS_vs_METAPODIAL	REGION
MA0714.1	BOTH_REGIONS	MA0714.1	PITX3	39.887	30.8452	0.526589	BOTH_REGIONS_vs_METAPODIAL	REGION
MA0119.1	BOTH_REGIONS	MA0119.1	NFIC::TLX1	59.3931	17.3865	0.526546	BOTH_REGIONS_vs_METAPODIAL	REGION
MA0798.2	BOTH_REGIONS	MA0798.2	RFX3	52.7697	21.7237	0.526538	BOTH_REGIONS_vs_METAPODIAL	REGION
MA0827.1	BOTH_REGIONS	MA0827.1	OLIG3	38.1098	15.9837	0.526443	BOTH_REGIONS_vs_METAPODIAL	REGION
MA0900.2	BOTH_REGIONS	MA0900.2	HOXA2	22.6582	37.8951	0.525288	BOTH_REGIONS_vs_METAPODIAL	REGION
MA0842.2	BOTH_REGIONS	MA0842.2	NRL	43.1587	15.5766	0.524436	BOTH_REGIONS_vs_METAPODIAL	REGION
MA1530.1	BOTH_REGIONS	MA1530.1	NKX6-3	29.4582	35.2522	0.523777	BOTH_REGIONS_vs_METAPODIAL	REGION
MA1110.1	BOTH_REGIONS	MA1110.1	NR1H4	45.7909	22.4832	0.522213	BOTH_REGIONS_vs_METAPODIAL	REGION
MA0486.2	BOTH_REGIONS	MA0486.2	HSF1	36.9616	7.47462	0.522063	BOTH_REGIONS_vs_METAPODIAL	REGION
MA1560.1	BOTH_REGIONS	MA1560.1	SOHLH2	65.412	11.5999	0.521913	BOTH_REGIONS_vs_METAPODIAL	REGION
MA1533.1	BOTH_REGIONS	MA1533.1	NR1I2	53.0185	15.0779	0.521671	BOTH_REGIONS_vs_METAPODIAL	REGION
MA1496.1	BOTH_REGIONS	MA1496.1	HOXA4	32.6996	24.1191	0.521574	BOTH_REGIONS_vs_METAPODIAL	REGION
MA0072.1	BOTH_REGIONS	MA0072.1	RORA(var.2)	36.8805	9.8089	0.520912	BOTH_REGIONS_vs_METAPODIAL	REGION
MA0472.2	BOTH_REGIONS	MA0472.2	EGR2	74.6753	9.64438	0.520685	BOTH_REGIONS_vs_METAPODIAL	REGION
MA0667.1	BOTH_REGIONS	MA0667.1	MYF6	40.3455	14.7953	0.520575	BOTH_REGIONS_vs_METAPODIAL	REGION
MA1133.1	BOTH_REGIONS	MA1133.1	JUN::JUNB(var.2)	46.0102	13.5203	0.519532	BOTH_REGIONS_vs_METAPODIAL	REGION
MA0838.1	BOTH_REGIONS	MA0838.1	CEBPG	42.6829	5.65389	0.519281	BOTH_REGIONS_vs_METAPODIAL	REGION
MA0635.1	BOTH_REGIONS	MA0635.1	BARHL2	34.3177	19.5045	0.519277	BOTH_REGIONS_vs_METAPODIAL	REGION
MA0724.1	BOTH_REGIONS	MA0724.1	VENTX	31.6027	20.0478	0.518715	BOTH_REGIONS_vs_METAPODIAL	REGION
MA1542.1	BOTH_REGIONS	MA1542.1	OSR1	53.6585	23.3362	0.517605	BOTH_REGIONS_vs_METAPODIAL	REGION
MA0894.1	BOTH_REGIONS	MA0894.1	HESX1	27.0876	39.2826	0.517551	BOTH_REGIONS_vs_METAPODIAL	REGION
MA1519.1	BOTH_REGIONS	MA1519.1	LHX5	19.8986	38.2769	0.516469	BOTH_REGIONS_vs_METAPODIAL	REGION
MA0660.1	BOTH_REGIONS	MA0660.1	MEF2B	25.4008	19.2086	0.515804	BOTH_REGIONS_vs_METAPODIAL	REGION
MA0767.1	BOTH_REGIONS	MA0767.1	GCM2	61.0601	19.0291	0.515797	BOTH_REGIONS_vs_METAPODIAL	REGION
MA1574.1	BOTH_REGIONS	MA1574.1	THRB	52.0353	18.2468	0.515208	BOTH_REGIONS_vs_METAPODIAL	REGION
MA0914.1	BOTH_REGIONS	MA0914.1	ISL2	35.0765	24.2689	0.514405	BOTH_REGIONS_vs_METAPODIAL	REGION
MA1481.1	BOTH_REGIONS	MA1481.1	DRGX	22.8717	36.9326	0.513822	BOTH_REGIONS_vs_METAPODIAL	REGION
MA1571.1	BOTH_REGIONS	MA1571.1	TGIF2LX	51.5718	12.4616	0.512827	BOTH_REGIONS_vs_METAPODIAL	REGION
MA1640.1	BOTH_REGIONS	MA1640.1	MEIS2(var.2)	30.3134	31.2537	0.512345	BOTH_REGIONS_vs_METAPODIAL	REGION
MA0464.2	BOTH_REGIONS	MA0464.2	BHLHE40	60.8122	8.87443	0.510932	BOTH_REGIONS_vs_METAPODIAL	REGION
MA0679.2	BOTH_REGIONS	MA0679.2	ONECUT1	23.3078	27.7808	0.51082	BOTH_REGIONS_vs_METAPODIAL	REGION
MA0516.2	BOTH_REGIONS	MA0516.2	SP2	65.9472	18.6219	0.51054	BOTH_REGIONS_vs_METAPODIAL	REGION
MA0506.1	BOTH_REGIONS	MA0506.1	NRF1	81.1408	11.3167	0.508973	BOTH_REGIONS_vs_METAPODIAL	REGION
MA0718.1	BOTH_REGIONS	MA0718.1	RAX	25.4842	33.1591	0.50873	BOTH_REGIONS_vs_METAPODIAL	REGION
MA1572.1	BOTH_REGIONS	MA1572.1	TGIF2LY	51.147	13.8845	0.507972	BOTH_REGIONS_vs_METAPODIAL	REGION
MA0095.2	BOTH_REGIONS	MA0095.2	YY1	52.6718	36.2901	0.506626	BOTH_REGIONS_vs_METAPODIAL	REGION
MA1468.1	BOTH_REGIONS	MA1468.1	ATOH7	44.9644	28.1363	0.506608	BOTH_REGIONS_vs_METAPODIAL	REGION
MA1657.1	BOTH_REGIONS	MA1657.1	ZNF652	32.7103	26.0201	0.505142	BOTH_REGIONS_vs_METAPODIAL	REGION
MA0707.1	BOTH_REGIONS	MA0707.1	MNX1	23.4756	37.2806	0.504299	BOTH_REGIONS_vs_METAPODIAL	REGION
MA0871.2	BOTH_REGIONS	MA0871.2	TFEC	60.8133	9.75812	0.501183	BOTH_REGIONS_vs_METAPODIAL	REGION
MA1421.1	BOTH_REGIONS	MA1421.1	TCF7L1	35.1397	16.6232	0.500387	BOTH_REGIONS_vs_METAPODIAL	REGION
MA0156.2	BOTH_REGIONS	MA0156.2	FEV	54.2218	13.5245	0.49984	BOTH_REGIONS_vs_METAPODIAL	REGION
MA1528.1	BOTH_REGIONS	MA1528.1	NFIX(var.2)	61.7365	17.0446	0.499599	BOTH_REGIONS_vs_METAPODIAL	REGION
MA0868.2	BOTH_REGIONS	MA0868.2	SOX8	35.102	34.3581	0.499538	BOTH_REGIONS_vs_METAPODIAL	REGION
MA0913.2	BOTH_REGIONS	MA0913.2	HOXD9	25.1521	41.6672	0.499326	BOTH_REGIONS_vs_METAPODIAL	REGION
MA0674.1	BOTH_REGIONS	MA0674.1	NKX6-1	19.797	34.0605	0.499284	BOTH_REGIONS_vs_METAPODIAL	REGION
MA1643.1	BOTH_REGIONS	MA1643.1	NFIB	59.0379	15.268	0.497487	BOTH_REGIONS_vs_METAPODIAL	REGION
MA0620.3	BOTH_REGIONS	MA0620.3	MITF	47.5651	9.42121	0.495526	BOTH_REGIONS_vs_METAPODIAL	REGION
MA0734.2	BOTH_REGIONS	MA0734.2	GLI2	66.9607	11.7848	0.49484	BOTH_REGIONS_vs_METAPODIAL	REGION
MA1509.1	BOTH_REGIONS	MA1509.1	IRF6	46.2147	4.7515	0.494743	BOTH_REGIONS_vs_METAPODIAL	REGION
MA0641.1	BOTH_REGIONS	MA0641.1	ELF4	55.0847	6.99626	0.494579	BOTH_REGIONS_vs_METAPODIAL	REGION
MA0890.1	BOTH_REGIONS	MA0890.1	GBX2	29.4898	33.6878	0.494042	BOTH_REGIONS_vs_METAPODIAL	REGION
MA0760.1	BOTH_REGIONS	MA0760.1	ERF	54.3235	12.3108	0.493942	BOTH_REGIONS_vs_METAPODIAL	REGION
MA0716.1	BOTH_REGIONS	MA0716.1	PRRX1	21.2005	34.1182	0.492993	BOTH_REGIONS_vs_METAPODIAL	REGION
MA0766.2	BOTH_REGIONS	MA0766.2	GATA5	38.4381	20.757	0.492965	BOTH_REGIONS_vs_METAPODIAL	REGION
MA0864.2	BOTH_REGIONS	MA0864.2	E2F2	53.4987	5.61805	0.49275	BOTH_REGIONS_vs_METAPODIAL	REGION
MA0474.2	BOTH_REGIONS	MA0474.2	ERG	54.0102	18.5076	0.492309	BOTH_REGIONS_vs_METAPODIAL	REGION
MA1529.1	BOTH_REGIONS	MA1529.1	NHLH2	68.0045	10.6195	0.491855	BOTH_REGIONS_vs_METAPODIAL	REGION
MA1583.1	BOTH_REGIONS	MA1583.1	ZFP57	62.8235	6.78008	0.491381	BOTH_REGIONS_vs_METAPODIAL	REGION
MA1573.1	BOTH_REGIONS	MA1573.1	THAP11	48.6327	5.38587	0.488699	BOTH_REGIONS_vs_METAPODIAL	REGION
MA0773.1	BOTH_REGIONS	MA0773.1	MEF2D	22.5126	16.9401	0.488306	BOTH_REGIONS_vs_METAPODIAL	REGION
MA1126.1	BOTH_REGIONS	MA1126.1	FOS::JUN(var.2)	44.7903	14.8556	0.487334	BOTH_REGIONS_vs_METAPODIAL	REGION
MA0060.3	BOTH_REGIONS	MA0060.3	NFYA	49.0251	16.4596	0.486824	BOTH_REGIONS_vs_METAPODIAL	REGION
MA0132.2	BOTH_REGIONS	MA0132.2	PDX1	23.6041	40.0459	0.485795	BOTH_REGIONS_vs_METAPODIAL	REGION
MA1480.1	BOTH_REGIONS	MA1480.1	DPRX	39.7762	16.5781	0.484149	BOTH_REGIONS_vs_METAPODIAL	REGION
MA0143.4	BOTH_REGIONS	MA0143.4	SOX2	37.4421	31.3017	0.483104	BOTH_REGIONS_vs_METAPODIAL	REGION
MA1117.1	BOTH_REGIONS	MA1117.1	RELB	54.9074	17.924	0.482694	BOTH_REGIONS_vs_METAPODIAL	REGION
MA1550.1	BOTH_REGIONS	MA1550.1	PPARD	48.6023	5.48585	0.482204	BOTH_REGIONS_vs_METAPODIAL	REGION
MA0882.1	BOTH_REGIONS	MA0882.1	DLX6	23.2143	37.4119	0.481921	BOTH_REGIONS_vs_METAPODIAL	REGION
MA1491.1	BOTH_REGIONS	MA1491.1	GLI3	66.9377	17.2459	0.481706	BOTH_REGIONS_vs_METAPODIAL	REGION
MA1654.1	BOTH_REGIONS	MA1654.1	ZNF16	54.1223	5.24666	0.481203	BOTH_REGIONS_vs_METAPODIAL	REGION
MA0025.2	BOTH_REGIONS	MA0025.2	NFIL3	29.1438	19.8918	0.480312	BOTH_REGIONS_vs_METAPODIAL	REGION
MA1651.1	BOTH_REGIONS	MA1651.1	ZFP42	52.8412	16.8463	0.479543	BOTH_REGIONS_vs_METAPODIAL	REGION
MA0649.1	BOTH_REGIONS	MA0649.1	HEY2	67.5153	12.8085	0.479279	BOTH_REGIONS_vs_METAPODIAL	REGION
MA1570.1	BOTH_REGIONS	MA1570.1	TFAP4(var.2)	43.3503	26.0547	0.478548	BOTH_REGIONS_vs_METAPODIAL	REGION
MA0069.1	BOTH_REGIONS	MA0069.1	PAX6	43.2945	10.6109	0.475864	BOTH_REGIONS_vs_METAPODIAL	REGION
MA0498.2	BOTH_REGIONS	MA0498.2	MEIS1	45.1379	24.1887	0.475004	BOTH_REGIONS_vs_METAPODIAL	REGION
MA1602.1	BOTH_REGIONS	MA1602.1	ZSCAN29	56.9374	5.97595	0.472895	BOTH_REGIONS_vs_METAPODIAL	REGION
MA0837.1	BOTH_REGIONS	MA0837.1	CEBPE	40.9969	10.2471	0.471575	BOTH_REGIONS_vs_METAPODIAL	REGION
MA0831.2	BOTH_REGIONS	MA0831.2	TFE3	57.0701	22.3216	0.470782	BOTH_REGIONS_vs_METAPODIAL	REGION
MA0740.1	BOTH_REGIONS	MA0740.1	KLF14	68.7727	14.8653	0.470551	BOTH_REGIONS_vs_METAPODIAL	REGION
MA1154.1	BOTH_REGIONS	MA1154.1	ZNF282	50.8677	4.10164	0.468737	BOTH_REGIONS_vs_METAPODIAL	REGION
MA0495.3	BOTH_REGIONS	MA0495.3	MAFF	38.0831	26.5798	0.467297	BOTH_REGIONS_vs_METAPODIAL	REGION
MA0685.1	BOTH_REGIONS	MA0685.1	SP4	66.368	6.75717	0.467206	BOTH_REGIONS_vs_METAPODIAL	REGION
MA0692.1	BOTH_REGIONS	MA0692.1	TFEB	55.499	17.5846	0.467079	BOTH_REGIONS_vs_METAPODIAL	REGION
MA0659.2	BOTH_REGIONS	MA0659.2	MAFG	40.0409	28.5801	0.466536	BOTH_REGIONS_vs_METAPODIAL	REGION
MA1507.1	BOTH_REGIONS	MA1507.1	HOXD4	23.9544	37.7463	0.466486	BOTH_REGIONS_vs_METAPODIAL	REGION
MA0492.1	BOTH_REGIONS	MA0492.1	JUND(var.2)	39.1069	15.0384	0.466002	BOTH_REGIONS_vs_METAPODIAL	REGION
MA0654.1	BOTH_REGIONS	MA0654.1	ISX	19.8986	35.1287	0.465951	BOTH_REGIONS_vs_METAPODIAL	REGION
MA0744.2	BOTH_REGIONS	MA0744.2	SCRT2	49.5541	22.9592	0.465665	BOTH_REGIONS_vs_METAPODIAL	REGION
MA0683.1	BOTH_REGIONS	MA0683.1	POU4F2	23.3121	6.05582	0.465357	BOTH_REGIONS_vs_METAPODIAL	REGION
MA0828.1	BOTH_REGIONS	MA0828.1	SREBF2(var.2)	49.4405	8.86159	0.464357	BOTH_REGIONS_vs_METAPODIAL	REGION
MA0663.1	BOTH_REGIONS	MA0663.1	MLX	49.3401	4.62466	0.463937	BOTH_REGIONS_vs_METAPODIAL	REGION
MA1556.1	BOTH_REGIONS	MA1556.1	RXRG(var.2)	59.2593	5.96188	0.462868	BOTH_REGIONS_vs_METAPODIAL	REGION
MA1120.1	BOTH_REGIONS	MA1120.1	SOX13	40.8163	31.7806	0.462865	BOTH_REGIONS_vs_METAPODIAL	REGION
MA0102.4	BOTH_REGIONS	MA0102.4	CEBPA	35.2256	23.312	0.462674	BOTH_REGIONS_vs_METAPODIAL	REGION
MA1119.1	BOTH_REGIONS	MA1119.1	SIX2	42.5478	22.6425	0.46261	BOTH_REGIONS_vs_METAPODIAL	REGION
MA0517.1	BOTH_REGIONS	MA0517.1	STAT1::STAT2	37.0421	35.0281	0.460948	BOTH_REGIONS_vs_METAPODIAL	REGION
MA0664.1	BOTH_REGIONS	MA0664.1	MLXIPL	51.3211	8.35002	0.460704	BOTH_REGIONS_vs_METAPODIAL	REGION
MA1552.1	BOTH_REGIONS	MA1552.1	RARB(var.3)	53.5714	7.11797	0.460677	BOTH_REGIONS_vs_METAPODIAL	REGION
MA0098.3	BOTH_REGIONS	MA0098.3	ETS1	54.6748	15.6828	0.459694	BOTH_REGIONS_vs_METAPODIAL	REGION
MA0482.2	BOTH_REGIONS	MA0482.2	GATA4	37.0623	26.6939	0.459406	BOTH_REGIONS_vs_METAPODIAL	REGION
MA0610.1	BOTH_REGIONS	MA0610.1	DMRT3	34.1667	21.6284	0.4586	BOTH_REGIONS_vs_METAPODIAL	REGION
MA1636.1	BOTH_REGIONS	MA1636.1	CEBPG(var.2)	35.3061	20.7239	0.457789	BOTH_REGIONS_vs_METAPODIAL	REGION
MA1499.1	BOTH_REGIONS	MA1499.1	HOXB4	22.9404	35.5761	0.457699	BOTH_REGIONS_vs_METAPODIAL	REGION
MA1585.1	BOTH_REGIONS	MA1585.1	ZKSCAN1	46.4975	14.9546	0.456921	BOTH_REGIONS_vs_METAPODIAL	REGION
MA0093.3	BOTH_REGIONS	MA0093.3	USF1	51.0234	16.8666	0.456474	BOTH_REGIONS_vs_METAPODIAL	REGION
MA0511.2	BOTH_REGIONS	MA0511.2	RUNX2	50	21.0306	0.456265	BOTH_REGIONS_vs_METAPODIAL	REGION
MA0526.3	BOTH_REGIONS	MA0526.3	USF2	51.4931	17.3314	0.455364	BOTH_REGIONS_vs_METAPODIAL	REGION
MA1649.1	BOTH_REGIONS	MA1649.1	ZBTB12	51.1606	21.4633	0.455177	BOTH_REGIONS_vs_METAPODIAL	REGION
MA0789.1	BOTH_REGIONS	MA0789.1	POU3F4	21.3394	20.5266	0.453418	BOTH_REGIONS_vs_METAPODIAL	REGION
MA1150.1	BOTH_REGIONS	MA1150.1	RORB	42.076	20.5025	0.45277	BOTH_REGIONS_vs_METAPODIAL	REGION
MA0787.1	BOTH_REGIONS	MA0787.1	POU3F2	21.9492	23.34	0.450683	BOTH_REGIONS_vs_METAPODIAL	REGION
MA0465.2	BOTH_REGIONS	MA0465.2	CDX2	28.887	38.2698	0.449866	BOTH_REGIONS_vs_METAPODIAL	REGION
MA0616.2	BOTH_REGIONS	MA0616.2	HES2	72.6348	11.2443	0.449151	BOTH_REGIONS_vs_METAPODIAL	REGION
MA0791.1	BOTH_REGIONS	MA0791.1	POU4F3	24.5379	24.6015	0.448542	BOTH_REGIONS_vs_METAPODIAL	REGION
MA0035.4	BOTH_REGIONS	MA0035.4	GATA1	30.4833	16.2751	0.448295	BOTH_REGIONS_vs_METAPODIAL	REGION
MA0778.1	BOTH_REGIONS	MA0778.1	NFKB2	67.0837	9.75276	0.447804	BOTH_REGIONS_vs_METAPODIAL	REGION
MA1597.1	BOTH_REGIONS	MA1597.1	ZNF528	55.9159	6.306	0.44706	BOTH_REGIONS_vs_METAPODIAL	REGION
MA1536.1	BOTH_REGIONS	MA1536.1	NR2C2(var.2)	54.0609	20.2282	0.447029	BOTH_REGIONS_vs_METAPODIAL	REGION
MA0899.1	BOTH_REGIONS	MA0899.1	HOXA10	26.4624	41.2264	0.446502	BOTH_REGIONS_vs_METAPODIAL	REGION
MA0161.2	BOTH_REGIONS	MA0161.2	NFIC	52.5534	16.6931	0.445756	BOTH_REGIONS_vs_METAPODIAL	REGION
MA0523.1	BOTH_REGIONS	MA0523.1	TCF7L2	39.6514	29.843	0.445246	BOTH_REGIONS_vs_METAPODIAL	REGION
MA1632.1	BOTH_REGIONS	MA1632.1	ATF2	41.4118	20.2547	0.444943	BOTH_REGIONS_vs_METAPODIAL	REGION
MA0091.1	BOTH_REGIONS	MA0091.1	TAL1::TCF3	45.3311	18.5726	0.44488	BOTH_REGIONS_vs_METAPODIAL	REGION
MA0036.3	BOTH_REGIONS	MA0036.3	GATA2	34.1057	24.5943	0.444764	BOTH_REGIONS_vs_METAPODIAL	REGION
MA1485.1	BOTH_REGIONS	MA1485.1	FERD3L	59.3455	6.30622	0.444753	BOTH_REGIONS_vs_METAPODIAL	REGION
MA1479.1	BOTH_REGIONS	MA1479.1	DMRTC2	29.4317	19.681	0.443882	BOTH_REGIONS_vs_METAPODIAL	REGION
MA1106.1	BOTH_REGIONS	MA1106.1	HIF1A	61.9675	11.9236	0.443653	BOTH_REGIONS_vs_METAPODIAL	REGION
MA0689.1	BOTH_REGIONS	MA0689.1	TBX20	43.0157	20.9849	0.442022	BOTH_REGIONS_vs_METAPODIAL	REGION
MA1504.1	BOTH_REGIONS	MA1504.1	HOXC4	25.1899	36.5753	0.441682	BOTH_REGIONS_vs_METAPODIAL	REGION
MA1555.1	BOTH_REGIONS	MA1555.1	RXRB(var.2)	58.1514	7.58198	0.441571	BOTH_REGIONS_vs_METAPODIAL	REGION
MA1148.1	BOTH_REGIONS	MA1148.1	PPARA::RXRA	46.1234	23.1502	0.441026	BOTH_REGIONS_vs_METAPODIAL	REGION
MA0059.1	BOTH_REGIONS	MA0059.1	MAX::MYC	60.0186	11.5002	0.441021	BOTH_REGIONS_vs_METAPODIAL	REGION
MA0163.1	BOTH_REGIONS	MA0163.1	PLAG1	78.7988	19.3901	0.440242	BOTH_REGIONS_vs_METAPODIAL	REGION
MA0507.1	BOTH_REGIONS	MA0507.1	POU2F2	28.6943	20.2166	0.440097	BOTH_REGIONS_vs_METAPODIAL	REGION
MA0028.2	BOTH_REGIONS	MA0028.2	ELK1	58.0875	5.56482	0.439954	BOTH_REGIONS_vs_METAPODIAL	REGION
MA1644.1	BOTH_REGIONS	MA1644.1	NFYC	47.3048	14.2047	0.438361	BOTH_REGIONS_vs_METAPODIAL	REGION
MA1645.1	BOTH_REGIONS	MA1645.1	NKX2-2	48.9424	31.8343	0.438311	BOTH_REGIONS_vs_METAPODIAL	REGION
MA1592.1	BOTH_REGIONS	MA1592.1	ZNF274	48.8579	7.38183	0.437926	BOTH_REGIONS_vs_METAPODIAL	REGION
MA1576.1	BOTH_REGIONS	MA1576.1	THRB(var.3)	51.1765	4.71321	0.437713	BOTH_REGIONS_vs_METAPODIAL	REGION
MA1524.1	BOTH_REGIONS	MA1524.1	MSGN1	49.7036	23.3288	0.437169	BOTH_REGIONS_vs_METAPODIAL	REGION
MA1531.1	BOTH_REGIONS	MA1531.1	NR1D1	54.7667	4.77173	0.436947	BOTH_REGIONS_vs_METAPODIAL	REGION
MA0137.3	BOTH_REGIONS	MA0137.3	STAT1	41.5129	22.9206	0.436809	BOTH_REGIONS_vs_METAPODIAL	REGION
MA0784.1	BOTH_REGIONS	MA0784.1	POU1F1	24.6905	19.2954	0.43672	BOTH_REGIONS_vs_METAPODIAL	REGION
MA0790.1	BOTH_REGIONS	MA0790.1	POU4F1	20.8879	26.0388	0.436038	BOTH_REGIONS_vs_METAPODIAL	REGION
MA0509.2	BOTH_REGIONS	MA0509.2	RFX1	49.3071	16.4923	0.435523	BOTH_REGIONS_vs_METAPODIAL	REGION
MA1655.1	BOTH_REGIONS	MA1655.1	ZNF341	57.0943	29.3604	0.43409	BOTH_REGIONS_vs_METAPODIAL	REGION
MA0788.1	BOTH_REGIONS	MA0788.1	POU3F3	20.1258	25.2257	0.433953	BOTH_REGIONS_vs_METAPODIAL	REGION
MA1113.2	BOTH_REGIONS	MA1113.2	PBX2	27.2799	25.6594	0.433522	BOTH_REGIONS_vs_METAPODIAL	REGION
MA1476.1	BOTH_REGIONS	MA1476.1	DLX5	22.5888	37.7463	0.433255	BOTH_REGIONS_vs_METAPODIAL	REGION
MA0812.1	BOTH_REGIONS	MA0812.1	TFAP2B(var.2)	73.1054	18.9405	0.431625	BOTH_REGIONS_vs_METAPODIAL	REGION
MA0686.1	BOTH_REGIONS	MA0686.1	SPDEF	54.8476	5.46385	0.431118	BOTH_REGIONS_vs_METAPODIAL	REGION
MA0070.1	BOTH_REGIONS	MA0070.1	PBX1	31.53	13.0266	0.43074	BOTH_REGIONS_vs_METAPODIAL	REGION
MA0107.1	BOTH_REGIONS	MA0107.1	RELA	56.3636	16.7653	0.427673	BOTH_REGIONS_vs_METAPODIAL	REGION
MA0792.1	BOTH_REGIONS	MA0792.1	POU5F1B	21.9955	27.2278	0.42661	BOTH_REGIONS_vs_METAPODIAL	REGION
MA0690.1	BOTH_REGIONS	MA0690.1	TBX21	42.9009	20.9528	0.42639	BOTH_REGIONS_vs_METAPODIAL	REGION
MA1467.1	BOTH_REGIONS	MA1467.1	ATOH1(var.2)	52.6849	24.9263	0.426026	BOTH_REGIONS_vs_METAPODIAL	REGION
MA0681.2	BOTH_REGIONS	MA0681.2	PHOX2B	15.0606	27.4112	0.425907	BOTH_REGIONS_vs_METAPODIAL	REGION
MA1104.2	BOTH_REGIONS	MA1104.2	GATA6	30.8176	22.0323	0.425612	BOTH_REGIONS_vs_METAPODIAL	REGION
MA1105.2	BOTH_REGIONS	MA1105.2	GRHL2	41.1915	24.7359	0.425498	BOTH_REGIONS_vs_METAPODIAL	REGION
MA0488.1	BOTH_REGIONS	MA0488.1	JUN	38.0469	14.3835	0.425427	BOTH_REGIONS_vs_METAPODIAL	REGION
MA0079.4	BOTH_REGIONS	MA0079.4	SP1	69.5122	8.42485	0.425413	BOTH_REGIONS_vs_METAPODIAL	REGION
MA0745.2	BOTH_REGIONS	MA0745.2	SNAI2	56.4465	32.9532	0.425057	BOTH_REGIONS_vs_METAPODIAL	REGION
MA1514.1	BOTH_REGIONS	MA1514.1	KLF17	65.7609	18.5292	0.424876	BOTH_REGIONS_vs_METAPODIAL	REGION
MA1474.1	BOTH_REGIONS	MA1474.1	CREB3L4	60.2716	10.2806	0.42469	BOTH_REGIONS_vs_METAPODIAL	REGION
MA0502.2	BOTH_REGIONS	MA0502.2	NFYB	57.6041	17.7178	0.424551	BOTH_REGIONS_vs_METAPODIAL	REGION
MA0782.2	BOTH_REGIONS	MA0782.2	PKNOX1	49.0476	24.5547	0.4231	BOTH_REGIONS_vs_METAPODIAL	REGION
MA0014.3	BOTH_REGIONS	MA0014.3	PAX5	64.5408	15.9785	0.422813	BOTH_REGIONS_vs_METAPODIAL	REGION
MA1111.1	BOTH_REGIONS	MA1111.1	NR2F2	43.3488	24.493	0.421165	BOTH_REGIONS_vs_METAPODIAL	REGION
MA0037.3	BOTH_REGIONS	MA0037.3	GATA3	32.4461	21.4545	0.421024	BOTH_REGIONS_vs_METAPODIAL	REGION
MA0672.1	BOTH_REGIONS	MA0672.1	NKX2-3	47.8217	30.671	0.419602	BOTH_REGIONS_vs_METAPODIAL	REGION
MA1553.1	BOTH_REGIONS	MA1553.1	RARG(var.3)	50.5095	5.89007	0.41953	BOTH_REGIONS_vs_METAPODIAL	REGION
MA0147.3	BOTH_REGIONS	MA0147.3	MYC	66.9499	13.8336	0.419489	BOTH_REGIONS_vs_METAPODIAL	REGION
MA1521.1	BOTH_REGIONS	MA1521.1	MAFA	54.0082	10.9982	0.41925	BOTH_REGIONS_vs_METAPODIAL	REGION
MA1118.1	BOTH_REGIONS	MA1118.1	SIX1	40.9091	15.9662	0.417252	BOTH_REGIONS_vs_METAPODIAL	REGION
MA1099.2	BOTH_REGIONS	MA1099.2	HES1	73.7854	10.9896	0.416167	BOTH_REGIONS_vs_METAPODIAL	REGION
MA1464.1	BOTH_REGIONS	MA1464.1	ARNT2	60.4675	7.81427	0.416137	BOTH_REGIONS_vs_METAPODIAL	REGION
MA0759.1	BOTH_REGIONS	MA0759.1	ELK3	55.646	8.54437	0.41591	BOTH_REGIONS_vs_METAPODIAL	REGION
MA1151.1	BOTH_REGIONS	MA1151.1	RORC	41.7657	18.3473	0.414829	BOTH_REGIONS_vs_METAPODIAL	REGION
MA0775.1	BOTH_REGIONS	MA0775.1	MEIS3	48.1576	27.1988	0.414521	BOTH_REGIONS_vs_METAPODIAL	REGION
MA1114.1	BOTH_REGIONS	MA1114.1	PBX3	53.3893	25.4088	0.414402	BOTH_REGIONS_vs_METAPODIAL	REGION
MA1569.1	BOTH_REGIONS	MA1569.1	TFAP2E	79.2244	22.9241	0.413726	BOTH_REGIONS_vs_METAPODIAL	REGION
MA0101.1	BOTH_REGIONS	MA0101.1	REL	55.7927	19.9214	0.413482	BOTH_REGIONS_vs_METAPODIAL	REGION
MA0800.1	BOTH_REGIONS	MA0800.1	EOMES	42.79	23.7334	0.413263	BOTH_REGIONS_vs_METAPODIAL	REGION
MA0627.2	BOTH_REGIONS	MA0627.2	POU2F3	28.0345	24.8699	0.413135	BOTH_REGIONS_vs_METAPODIAL	REGION
MA0786.1	BOTH_REGIONS	MA0786.1	POU3F1	22.1374	27.7298	0.412513	BOTH_REGIONS_vs_METAPODIAL	REGION
MA1478.1	BOTH_REGIONS	MA1478.1	DMRTA2	34.8639	18.8377	0.412022	BOTH_REGIONS_vs_METAPODIAL	REGION
MA0823.1	BOTH_REGIONS	MA0823.1	HEY1	68.8708	8.89097	0.411852	BOTH_REGIONS_vs_METAPODIAL	REGION
MA0084.1	BOTH_REGIONS	MA0084.1	SRY	24.0363	29.0973	0.411845	BOTH_REGIONS_vs_METAPODIAL	REGION
MA0157.2	BOTH_REGIONS	MA0157.2	FOXO3	26.2357	13.3981	0.411423	BOTH_REGIONS_vs_METAPODIAL	REGION
MA0524.2	BOTH_REGIONS	MA0524.2	TFAP2C	72.449	21.137	0.411059	BOTH_REGIONS_vs_METAPODIAL	REGION
MA0691.1	BOTH_REGIONS	MA0691.1	TFAP4	46.599	13.3487	0.41101	BOTH_REGIONS_vs_METAPODIAL	REGION
MA0613.1	BOTH_REGIONS	MA0613.1	FOXG1	22.3767	18.0891	0.41053	BOTH_REGIONS_vs_METAPODIAL	REGION
MA1534.1	BOTH_REGIONS	MA1534.1	NR1I3	33.6712	22.3216	0.410431	BOTH_REGIONS_vs_METAPODIAL	REGION
MA0765.2	BOTH_REGIONS	MA0765.2	ETV5	59.1837	18.3718	0.410178	BOTH_REGIONS_vs_METAPODIAL	REGION
MA1112.2	BOTH_REGIONS	MA1112.2	NR4A1	40.102	28.9342	0.409959	BOTH_REGIONS_vs_METAPODIAL	REGION
MA0499.2	BOTH_REGIONS	MA0499.2	MYOD1	58.9159	36.2901	0.409658	BOTH_REGIONS_vs_METAPODIAL	REGION
MA0104.4	BOTH_REGIONS	MA0104.4	MYCN	68.4746	10.012	0.408957	BOTH_REGIONS_vs_METAPODIAL	REGION
MA1471.1	BOTH_REGIONS	MA1471.1	BARX2	24.5331	30.6974	0.408542	BOTH_REGIONS_vs_METAPODIAL	REGION
MA0811.1	BOTH_REGIONS	MA0811.1	TFAP2B	72.6887	21.3491	0.408021	BOTH_REGIONS_vs_METAPODIAL	REGION
MA0687.1	BOTH_REGIONS	MA0687.1	SPIC	40.9848	26.1515	0.407914	BOTH_REGIONS_vs_METAPODIAL	REGION
MA0076.2	BOTH_REGIONS	MA0076.2	ELK4	63.0996	17.8862	0.407695	BOTH_REGIONS_vs_METAPODIAL	REGION
MA0733.1	BOTH_REGIONS	MA0733.1	EGR4	64.0944	13.4316	0.407246	BOTH_REGIONS_vs_METAPODIAL	REGION
MA0774.1	BOTH_REGIONS	MA0774.1	MEIS2	50.5089	26.3942	0.407018	BOTH_REGIONS_vs_METAPODIAL	REGION
MA0696.1	BOTH_REGIONS	MA0696.1	ZIC1	76.6328	5.52089	0.406914	BOTH_REGIONS_vs_METAPODIAL	REGION
MA0829.2	BOTH_REGIONS	MA0829.2	SREBF1(var.2)	46.7836	14.9425	0.404835	BOTH_REGIONS_vs_METAPODIAL	REGION
MA0504.1	BOTH_REGIONS	MA0504.1	NR2C2	58.9952	18.119	0.403453	BOTH_REGIONS_vs_METAPODIAL	REGION
MA0056.2	BOTH_REGIONS	MA0056.2	MZF1	51.8025	23.3362	0.402616	BOTH_REGIONS_vs_METAPODIAL	REGION
MA1541.1	BOTH_REGIONS	MA1541.1	NR6A1	46.5548	11.4706	0.401252	BOTH_REGIONS_vs_METAPODIAL	REGION
MA1568.1	BOTH_REGIONS	MA1568.1	TCF21(var.2)	49.2373	9.35737	0.401023	BOTH_REGIONS_vs_METAPODIAL	REGION
MA0522.3	BOTH_REGIONS	MA0522.3	TCF3	66.7285	21.744	0.400204	BOTH_REGIONS_vs_METAPODIAL	REGION
MA0762.1	BOTH_REGIONS	MA0762.1	ETV2	46.7221	8.80993	0.400091	BOTH_REGIONS_vs_METAPODIAL	REGION
MA0815.1	BOTH_REGIONS	MA0815.1	TFAP2C(var.3)	76.6224	11.8868	0.39984	BOTH_REGIONS_vs_METAPODIAL	REGION
MA0508.3	BOTH_REGIONS	MA0508.3	PRDM1	41.7593	31.568	0.399257	BOTH_REGIONS_vs_METAPODIAL	REGION
MA0825.1	BOTH_REGIONS	MA0825.1	MNT	60.1015	9.80555	0.398862	BOTH_REGIONS_vs_METAPODIAL	REGION
MA1648.1	BOTH_REGIONS	MA1648.1	TCF12(var.2)	66.3889	21.3039	0.398746	BOTH_REGIONS_vs_METAPODIAL	REGION
MA0695.1	BOTH_REGIONS	MA0695.1	ZBTB7C	64.7359	18.8526	0.398465	BOTH_REGIONS_vs_METAPODIAL	REGION
MA0673.1	BOTH_REGIONS	MA0673.1	NKX2-8	47.9143	23.9315	0.398385	BOTH_REGIONS_vs_METAPODIAL	REGION
MA1650.1	BOTH_REGIONS	MA1650.1	ZBTB14	81.3084	10.4396	0.398381	BOTH_REGIONS_vs_METAPODIAL	REGION
MA1639.1	BOTH_REGIONS	MA1639.1	MEIS1(var.2)	31.6863	14.8653	0.397417	BOTH_REGIONS_vs_METAPODIAL	REGION
MA0592.3	BOTH_REGIONS	MA0592.3	ESRRA	49.2549	20.1803	0.397219	BOTH_REGIONS_vs_METAPODIAL	REGION
MA0050.2	BOTH_REGIONS	MA0050.2	IRF1	35.5588	36.3857	0.397093	BOTH_REGIONS_vs_METAPODIAL	REGION
MA0596.1	BOTH_REGIONS	MA0596.1	SREBF2	54.0347	22.9807	0.395629	BOTH_REGIONS_vs_METAPODIAL	REGION
MA0131.2	BOTH_REGIONS	MA0131.2	HINFP	72.6503	8.12051	0.395052	BOTH_REGIONS_vs_METAPODIAL	REGION
MA0155.1	BOTH_REGIONS	MA0155.1	INSM1	66.5526	22.5451	0.394764	BOTH_REGIONS_vs_METAPODIAL	REGION
MA0763.1	BOTH_REGIONS	MA0763.1	ETV3	54.527	8.1728	0.394633	BOTH_REGIONS_vs_METAPODIAL	REGION
MA1559.1	BOTH_REGIONS	MA1559.1	SNAI3	56.8528	29.1695	0.393391	BOTH_REGIONS_vs_METAPODIAL	REGION
MA0058.3	BOTH_REGIONS	MA0058.3	MAX	60.6707	9.53942	0.393331	BOTH_REGIONS_vs_METAPODIAL	REGION
MA0813.1	BOTH_REGIONS	MA0813.1	TFAP2B(var.3)	73.9437	13.1021	0.392655	BOTH_REGIONS_vs_METAPODIAL	REGION
MA0802.1	BOTH_REGIONS	MA0802.1	TBR1	42.5662	21.0784	0.391865	BOTH_REGIONS_vs_METAPODIAL	REGION
MA0751.1	BOTH_REGIONS	MA0751.1	ZIC4	72.3014	14.124	0.39185	BOTH_REGIONS_vs_METAPODIAL	REGION
MA1656.1	BOTH_REGIONS	MA1656.1	ZNF449	60.6856	22.6923	0.390257	BOTH_REGIONS_vs_METAPODIAL	REGION
MA0738.1	BOTH_REGIONS	MA0738.1	HIC2	63.2054	30.8425	0.389945	BOTH_REGIONS_vs_METAPODIAL	REGION
MA0160.1	BOTH_REGIONS	MA0160.1	NR4A2	49.2366	26.6717	0.389542	BOTH_REGIONS_vs_METAPODIAL	REGION
MA0645.1	BOTH_REGIONS	MA0645.1	ETV6	57.5788	16.3542	0.389516	BOTH_REGIONS_vs_METAPODIAL	REGION
MA0595.1	BOTH_REGIONS	MA0595.1	SREBF1	57.0265	23.213	0.389058	BOTH_REGIONS_vs_METAPODIAL	REGION
MA1532.1	BOTH_REGIONS	MA1532.1	NR1D2	50.1355	13.9184	0.388977	BOTH_REGIONS_vs_METAPODIAL	REGION
MA0048.2	BOTH_REGIONS	MA0048.2	NHLH1	68.4584	21.3456	0.388375	BOTH_REGIONS_vs_METAPODIAL	REGION
MA0711.1	BOTH_REGIONS	MA0711.1	OTX1	38.8041	24.1226	0.388307	BOTH_REGIONS_vs_METAPODIAL	REGION
MA1149.1	BOTH_REGIONS	MA1149.1	RARA::RXRG	55.2036	16.4702	0.388302	BOTH_REGIONS_vs_METAPODIAL	REGION
MA0785.1	BOTH_REGIONS	MA0785.1	POU2F1	24.5106	21.331	0.387284	BOTH_REGIONS_vs_METAPODIAL	REGION
MA0513.1	BOTH_REGIONS	MA0513.1	SMAD2::SMAD3::SMAD4	55.5991	28.481	0.38708	BOTH_REGIONS_vs_METAPODIAL	REGION
MA0810.1	BOTH_REGIONS	MA0810.1	TFAP2A(var.2)	75.2332	21.7014	0.38683	BOTH_REGIONS_vs_METAPODIAL	REGION
MA0698.1	BOTH_REGIONS	MA0698.1	ZBTB18	45.7031	16.3982	0.386577	BOTH_REGIONS_vs_METAPODIAL	REGION
MA0018.4	BOTH_REGIONS	MA0018.4	CREB1	42.2624	19.7667	0.386239	BOTH_REGIONS_vs_METAPODIAL	REGION
MA0712.2	BOTH_REGIONS	MA0712.2	OTX2	38.7097	29.3606	0.386145	BOTH_REGIONS_vs_METAPODIAL	REGION
MA1566.1	BOTH_REGIONS	MA1566.1	TBX3	57.1138	18.6159	0.386083	BOTH_REGIONS_vs_METAPODIAL	REGION
MA0682.2	BOTH_REGIONS	MA0682.2	PITX1	38.9873	31.7922	0.385996	BOTH_REGIONS_vs_METAPODIAL	REGION
MA0259.1	BOTH_REGIONS	MA0259.1	ARNT::HIF1A	65.8196	12.2718	0.385415	BOTH_REGIONS_vs_METAPODIAL	REGION
MA0501.1	BOTH_REGIONS	MA0501.1	MAF::NFE2	42.8765	7.73937	0.38508	BOTH_REGIONS_vs_METAPODIAL	REGION
MA0872.1	BOTH_REGIONS	MA0872.1	TFAP2A(var.3)	76.5442	12.4531	0.382988	BOTH_REGIONS_vs_METAPODIAL	REGION
MA1547.1	BOTH_REGIONS	MA1547.1	PITX2	37.4684	33.329	0.382103	BOTH_REGIONS_vs_METAPODIAL	REGION
MA0901.2	BOTH_REGIONS	MA0901.2	HOXB13	23.0825	38.3744	0.381773	BOTH_REGIONS_vs_METAPODIAL	REGION
MA0750.2	BOTH_REGIONS	MA0750.2	ZBTB7A	65.2038	17.4777	0.381665	BOTH_REGIONS_vs_METAPODIAL	REGION
MA0684.2	BOTH_REGIONS	MA0684.2	RUNX3	43.6224	28.9113	0.380045	BOTH_REGIONS_vs_METAPODIAL	REGION
MA0694.1	BOTH_REGIONS	MA0694.1	ZBTB7B	65.1695	10.3973	0.379895	BOTH_REGIONS_vs_METAPODIAL	REGION
MA1109.1	BOTH_REGIONS	MA1109.1	NEUROD1	54.1601	25.3489	0.379204	BOTH_REGIONS_vs_METAPODIAL	REGION
MA1108.2	BOTH_REGIONS	MA1108.2	MXI1	51.5244	39.9972	0.378855	BOTH_REGIONS_vs_METAPODIAL	REGION
MA0688.1	BOTH_REGIONS	MA0688.1	TBX2	43.9408	24.0914	0.378691	BOTH_REGIONS_vs_METAPODIAL	REGION
MA0693.2	BOTH_REGIONS	MA0693.2	VDR	41.8367	31.5155	0.378407	BOTH_REGIONS_vs_METAPODIAL	REGION
MA0769.2	BOTH_REGIONS	MA0769.2	TCF7	37.164	25.2973	0.377441	BOTH_REGIONS_vs_METAPODIAL	REGION
MA0671.1	BOTH_REGIONS	MA0671.1	NFIX	57.1267	24.5676	0.37694	BOTH_REGIONS_vs_METAPODIAL	REGION
MA1523.1	BOTH_REGIONS	MA1523.1	MSANTD3	51.222	19.6282	0.37686	BOTH_REGIONS_vs_METAPODIAL	REGION
MA1513.1	BOTH_REGIONS	MA1513.1	KLF15	90.4982	11.0636	0.376744	BOTH_REGIONS_vs_METAPODIAL	REGION
MA1122.1	BOTH_REGIONS	MA1122.1	TFDP1	71.0306	10.205	0.375575	BOTH_REGIONS_vs_METAPODIAL	REGION
MA1578.1	BOTH_REGIONS	MA1578.1	VEZF1	77.2819	19.7879	0.375566	BOTH_REGIONS_vs_METAPODIAL	REGION
MA1487.1	BOTH_REGIONS	MA1487.1	FOXE1	29.4396	10.139	0.375534	BOTH_REGIONS_vs_METAPODIAL	REGION
MA1593.1	BOTH_REGIONS	MA1593.1	ZNF317	45.9574	25.4603	0.371923	BOTH_REGIONS_vs_METAPODIAL	REGION
MA0031.1	BOTH_REGIONS	MA0031.1	FOXD1	27.5418	7.56577	0.37114	BOTH_REGIONS_vs_METAPODIAL	REGION
MA0665.1	BOTH_REGIONS	MA0665.1	MSC	46.1851	12.4172	0.370877	BOTH_REGIONS_vs_METAPODIAL	REGION
MA0805.1	BOTH_REGIONS	MA0805.1	TBX1	48.9848	22.524	0.37084	BOTH_REGIONS_vs_METAPODIAL	REGION
MA1516.1	BOTH_REGIONS	MA1516.1	KLF3	77.634	15.1822	0.370446	BOTH_REGIONS_vs_METAPODIAL	REGION
MA0697.1	BOTH_REGIONS	MA0697.1	ZIC3	75.848	7.02344	0.36938	BOTH_REGIONS_vs_METAPODIAL	REGION
MA0159.1	BOTH_REGIONS	MA0159.1	RARA::RXRA	53.4411	13.7178	0.369137	BOTH_REGIONS_vs_METAPODIAL	REGION
MA0071.1	BOTH_REGIONS	MA0071.1	RORA	42.5051	18.1461	0.365632	BOTH_REGIONS_vs_METAPODIAL	REGION
MA1599.1	BOTH_REGIONS	MA1599.1	ZNF682	65.2451	15.4376	0.364778	BOTH_REGIONS_vs_METAPODIAL	REGION
MA0057.1	BOTH_REGIONS	MA0057.1	MZF1(var.2)	58.4008	23.4096	0.363673	BOTH_REGIONS_vs_METAPODIAL	REGION
MA1567.1	BOTH_REGIONS	MA1567.1	TBX6	51.3706	22.2133	0.363478	BOTH_REGIONS_vs_METAPODIAL	REGION
MA0003.4	BOTH_REGIONS	MA0003.4	TFAP2A	65.9606	30.0168	0.363209	BOTH_REGIONS_vs_METAPODIAL	REGION
MA0073.1	BOTH_REGIONS	MA0073.1	RREB1	61.676	20.6652	0.36036	BOTH_REGIONS_vs_METAPODIAL	REGION
MA1123.2	BOTH_REGIONS	MA1123.2	TWIST1	48.8226	27.1169	0.358654	BOTH_REGIONS_vs_METAPODIAL	REGION
MA0814.2	BOTH_REGIONS	MA0814.2	TFAP2C(var.2)	70.1308	29.6057	0.357842	BOTH_REGIONS_vs_METAPODIAL	REGION
MA0466.2	BOTH_REGIONS	MA0466.2	CEBPB	41.6497	4.35374	0.357508	BOTH_REGIONS_vs_METAPODIAL	REGION
MA0867.2	BOTH_REGIONS	MA0867.2	SOX4	40.2041	40.1377	0.35565	BOTH_REGIONS_vs_METAPODIAL	REGION
MA1641.1	BOTH_REGIONS	MA1641.1	MYF5	55.7627	17.709	0.354173	BOTH_REGIONS_vs_METAPODIAL	REGION
MA0089.2	BOTH_REGIONS	MA0089.2	NFE2L1	44.232	6.08869	0.353574	BOTH_REGIONS_vs_METAPODIAL	REGION
MA1596.1	BOTH_REGIONS	MA1596.1	ZNF460	74.5223	23.7901	0.352376	BOTH_REGIONS_vs_METAPODIAL	REGION
MA0597.1	BOTH_REGIONS	MA0597.1	THAP1	60.7223	9.65798	0.35218	BOTH_REGIONS_vs_METAPODIAL	REGION
MA0484.2	BOTH_REGIONS	MA0484.2	HNF4G	46.202	16.6472	0.351475	BOTH_REGIONS_vs_METAPODIAL	REGION
MA0847.2	BOTH_REGIONS	MA0847.2	FOXD2	27.1306	23.0716	0.351329	BOTH_REGIONS_vs_METAPODIAL	REGION
MA0100.3	BOTH_REGIONS	MA0100.3	MYB	50.1526	22.5043	0.350517	BOTH_REGIONS_vs_METAPODIAL	REGION
MA1121.1	BOTH_REGIONS	MA1121.1	TEAD2	47.0173	22.826	0.350405	BOTH_REGIONS_vs_METAPODIAL	REGION
MA1540.1	BOTH_REGIONS	MA1540.1	NR5A1	55.0832	20.074	0.349448	BOTH_REGIONS_vs_METAPODIAL	REGION
MA1520.1	BOTH_REGIONS	MA1520.1	MAF	49.83	8.19666	0.349354	BOTH_REGIONS_vs_METAPODIAL	REGION
MA0807.1	BOTH_REGIONS	MA0807.1	TBX5	52.6048	20.2976	0.347351	BOTH_REGIONS_vs_METAPODIAL	REGION
MA1647.1	BOTH_REGIONS	MA1647.1	PRDM4	42.6716	22.9383	0.347309	BOTH_REGIONS_vs_METAPODIAL	REGION
MA0850.1	BOTH_REGIONS	MA0850.1	FOXP3	29.0276	17.3507	0.346054	BOTH_REGIONS_vs_METAPODIAL	REGION
MA0808.1	BOTH_REGIONS	MA0808.1	TEAD3	44.3038	22.8358	0.34543	BOTH_REGIONS_vs_METAPODIAL	REGION
MA1115.1	BOTH_REGIONS	MA1115.1	POU5F1	30.0186	24.2829	0.344815	BOTH_REGIONS_vs_METAPODIAL	REGION
MA0114.4	BOTH_REGIONS	MA0114.4	HNF4A	45.712	15.8783	0.344518	BOTH_REGIONS_vs_METAPODIAL	REGION
MA0074.1	BOTH_REGIONS	MA0074.1	RXRA::VDR	52.4949	4.59058	0.342781	BOTH_REGIONS_vs_METAPODIAL	REGION
MA0030.1	BOTH_REGIONS	MA0030.1	FOXF2	34.2125	11.5352	0.341479	BOTH_REGIONS_vs_METAPODIAL	REGION
MA0066.1	BOTH_REGIONS	MA0066.1	PPARG	52.1872	4.61067	0.341227	BOTH_REGIONS_vs_METAPODIAL	REGION
MA0442.2	BOTH_REGIONS	MA0442.2	SOX10	38.8323	35.0324	0.340527	BOTH_REGIONS_vs_METAPODIAL	REGION
MA1152.1	BOTH_REGIONS	MA1152.1	SOX15	30.7614	43.7192	0.340476	BOTH_REGIONS_vs_METAPODIAL	REGION
MA0830.2	BOTH_REGIONS	MA0830.2	TCF4	66.143	30.8452	0.340329	BOTH_REGIONS_vs_METAPODIAL	REGION
MA0852.2	BOTH_REGIONS	MA0852.2	FOXK1	38.5569	18.0278	0.340269	BOTH_REGIONS_vs_METAPODIAL	REGION
MA0479.1	BOTH_REGIONS	MA0479.1	FOXH1	40.1843	15.0172	0.339927	BOTH_REGIONS_vs_METAPODIAL	REGION
MA0080.5	BOTH_REGIONS	MA0080.5	SPI1	42.7769	35.4425	0.339035	BOTH_REGIONS_vs_METAPODIAL	REGION
MA0090.3	BOTH_REGIONS	MA0090.3	TEAD1	46.2687	20.8318	0.337346	BOTH_REGIONS_vs_METAPODIAL	REGION
MA1548.1	BOTH_REGIONS	MA1548.1	PLAGL2	83.8742	14.2635	0.336741	BOTH_REGIONS_vs_METAPODIAL	REGION
MA1646.1	BOTH_REGIONS	MA1646.1	OSR2	51.9182	25.8011	0.33627	BOTH_REGIONS_vs_METAPODIAL	REGION
MA1642.1	BOTH_REGIONS	MA1642.1	NEUROG2(var.2)	52.4333	22.6755	0.333474	BOTH_REGIONS_vs_METAPODIAL	REGION
MA1601.1	BOTH_REGIONS	MA1601.1	ZNF75D	52.8993	24.3533	0.333058	BOTH_REGIONS_vs_METAPODIAL	REGION
MA0047.3	BOTH_REGIONS	MA0047.3	FOXA2	29.5097	17.5543	0.332205	BOTH_REGIONS_vs_METAPODIAL	REGION
MA0801.1	BOTH_REGIONS	MA0801.1	MGA	51.465	23.2271	0.331919	BOTH_REGIONS_vs_METAPODIAL	REGION
MA1558.1	BOTH_REGIONS	MA1558.1	SNAI1	59.7152	29.0487	0.330576	BOTH_REGIONS_vs_METAPODIAL	REGION
MA0258.2	BOTH_REGIONS	MA0258.2	ESR2	58.2597	15.3283	0.330006	BOTH_REGIONS_vs_METAPODIAL	REGION
MA1652.1	BOTH_REGIONS	MA1652.1	ZKSCAN5	54.7636	25.4088	0.329811	BOTH_REGIONS_vs_METAPODIAL	REGION
MA0162.4	BOTH_REGIONS	MA0162.4	EGR1	75.4909	15.9029	0.329682	BOTH_REGIONS_vs_METAPODIAL	REGION
MA1683.1	BOTH_REGIONS	MA1683.1	FOXA3	31.3544	18.0422	0.328995	BOTH_REGIONS_vs_METAPODIAL	REGION
MA0746.2	BOTH_REGIONS	MA0746.2	SP3	74.7459	14.8433	0.328738	BOTH_REGIONS_vs_METAPODIAL	REGION
MA0471.2	BOTH_REGIONS	MA0471.2	E2F6	68.2602	22.9737	0.327954	BOTH_REGIONS_vs_METAPODIAL	REGION
MA0154.4	BOTH_REGIONS	MA0154.4	EBF1	64.0572	16.436	0.326961	BOTH_REGIONS_vs_METAPODIAL	REGION
MA1100.2	BOTH_REGIONS	MA1100.2	ASCL1	63.313	22.9647	0.325631	BOTH_REGIONS_vs_METAPODIAL	REGION
MA1631.1	BOTH_REGIONS	MA1631.1	ASCL1(var.2)	65.7255	26.3415	0.325239	BOTH_REGIONS_vs_METAPODIAL	REGION
MA1135.1	BOTH_REGIONS	MA1135.1	FOSB::JUNB	41.0987	12.2793	0.323345	BOTH_REGIONS_vs_METAPODIAL	REGION
MA1103.2	BOTH_REGIONS	MA1103.2	FOXK2	32.4699	16.8027	0.323164	BOTH_REGIONS_vs_METAPODIAL	REGION
MA1472.1	BOTH_REGIONS	MA1472.1	BHLHA15(var.2)	54.842	23.5835	0.321454	BOTH_REGIONS_vs_METAPODIAL	REGION
MA0017.2	BOTH_REGIONS	MA0017.2	NR2F1	53.3958	21.2496	0.320978	BOTH_REGIONS_vs_METAPODIAL	REGION
MA0152.1	BOTH_REGIONS	MA0152.1	NFATC2	34.7953	34.7048	0.3201	BOTH_REGIONS_vs_METAPODIAL	REGION
MA0497.1	BOTH_REGIONS	MA0497.1	MEF2C	27.7665	31.7806	0.320066	BOTH_REGIONS_vs_METAPODIAL	REGION
MA0845.1	BOTH_REGIONS	MA0845.1	FOXB1	18.721	20.5729	0.319714	BOTH_REGIONS_vs_METAPODIAL	REGION
MA1144.1	BOTH_REGIONS	MA1144.1	FOSL2::JUND	41.3374	11.9236	0.318941	BOTH_REGIONS_vs_METAPODIAL	REGION
MA1142.1	BOTH_REGIONS	MA1142.1	FOSL1::JUND	39.7358	10.9067	0.318484	BOTH_REGIONS_vs_METAPODIAL	REGION
MA0803.1	BOTH_REGIONS	MA0803.1	TBX15	50.7024	19.5452	0.31752	BOTH_REGIONS_vs_METAPODIAL	REGION
MA0144.2	BOTH_REGIONS	MA0144.2	STAT3	43.675	26.5577	0.316734	BOTH_REGIONS_vs_METAPODIAL	REGION
MA1134.1	BOTH_REGIONS	MA1134.1	FOS::JUNB	42.9297	10.1238	0.315912	BOTH_REGIONS_vs_METAPODIAL	REGION
MA1579.1	BOTH_REGIONS	MA1579.1	ZBTB26	47.1826	27.1988	0.315689	BOTH_REGIONS_vs_METAPODIAL	REGION
MA1512.1	BOTH_REGIONS	MA1512.1	KLF11	75.0923	16.305	0.315374	BOTH_REGIONS_vs_METAPODIAL	REGION
MA0849.1	BOTH_REGIONS	MA0849.1	FOXO6	27.7457	18.9328	0.313889	BOTH_REGIONS_vs_METAPODIAL	REGION
MA1565.1	BOTH_REGIONS	MA1565.1	TBX18	50.5932	22.6755	0.313786	BOTH_REGIONS_vs_METAPODIAL	REGION
MA0670.1	BOTH_REGIONS	MA0670.1	NFIA	49.3401	26.4127	0.312341	BOTH_REGIONS_vs_METAPODIAL	REGION
MA0478.1	BOTH_REGIONS	MA0478.1	FOSL2	47.6937	12.0474	0.310958	BOTH_REGIONS_vs_METAPODIAL	REGION
MA1138.1	BOTH_REGIONS	MA1138.1	FOSL2::JUNB	40.081	11.3824	0.310611	BOTH_REGIONS_vs_METAPODIAL	REGION
MA0099.3	BOTH_REGIONS	MA0099.3	FOS::JUN	41.4634	12.6352	0.31042	BOTH_REGIONS_vs_METAPODIAL	REGION
MA0625.1	BOTH_REGIONS	MA0625.1	NFATC3	37.9065	26.0617	0.30967	BOTH_REGIONS_vs_METAPODIAL	REGION
MA1517.1	BOTH_REGIONS	MA1517.1	KLF6	71.0988	18.6629	0.308381	BOTH_REGIONS_vs_METAPODIAL	REGION
MA1511.1	BOTH_REGIONS	MA1511.1	KLF10	71.5605	17.3507	0.308186	BOTH_REGIONS_vs_METAPODIAL	REGION
MA1102.2	BOTH_REGIONS	MA1102.2	CTCFL	78.6078	16.3467	0.307719	BOTH_REGIONS_vs_METAPODIAL	REGION
MA1525.1	BOTH_REGIONS	MA1525.1	NFATC4	40.2229	23.9578	0.307014	BOTH_REGIONS_vs_METAPODIAL	REGION
MA0500.2	BOTH_REGIONS	MA0500.2	MYOG	59.5238	17.6452	0.304841	BOTH_REGIONS_vs_METAPODIAL	REGION
MA0528.2	BOTH_REGIONS	MA0528.2	ZNF263	67.4339	21.4774	0.303505	BOTH_REGIONS_vs_METAPODIAL	REGION
MA1581.1	BOTH_REGIONS	MA1581.1	ZBTB6	60.7227	19.3439	0.300903	BOTH_REGIONS_vs_METAPODIAL	REGION
MA0753.2	BOTH_REGIONS	MA0753.2	ZNF740	79.8589	12.2283	0.300715	BOTH_REGIONS_vs_METAPODIAL	REGION
MA0741.1	BOTH_REGIONS	MA0741.1	KLF16	78.9474	17.0936	0.299814	BOTH_REGIONS_vs_METAPODIAL	REGION
MA0481.3	BOTH_REGIONS	MA0481.3	FOXP1	30.2412	16.0064	0.297725	BOTH_REGIONS_vs_METAPODIAL	REGION
MA0496.3	BOTH_REGIONS	MA0496.3	MAFK	50.5442	18.1382	0.297264	BOTH_REGIONS_vs_METAPODIAL	REGION
MA0820.1	BOTH_REGIONS	MA0820.1	FIGLA	54.4898	27.8463	0.297163	BOTH_REGIONS_vs_METAPODIAL	REGION
MA0809.2	BOTH_REGIONS	MA0809.2	TEAD4	43.9252	19.1553	0.295093	BOTH_REGIONS_vs_METAPODIAL	REGION
MA0136.2	BOTH_REGIONS	MA0136.2	ELF5	51.105	18.0449	0.294858	BOTH_REGIONS_vs_METAPODIAL	REGION
MA0148.4	BOTH_REGIONS	MA0148.4	FOXA1	29.5319	16.8037	0.294821	BOTH_REGIONS_vs_METAPODIAL	REGION
MA0748.2	BOTH_REGIONS	MA0748.2	YY2	67.2542	5.29896	0.294242	BOTH_REGIONS_vs_METAPODIAL	REGION
MA1637.1	BOTH_REGIONS	MA1637.1	EBF3	64.1287	13.9925	0.293527	BOTH_REGIONS_vs_METAPODIAL	REGION
MA0806.1	BOTH_REGIONS	MA0806.1	TBX4	49.6823	18.532	0.291994	BOTH_REGIONS_vs_METAPODIAL	REGION
MA0747.1	BOTH_REGIONS	MA0747.1	SP8	70.5433	18.7979	0.2919	BOTH_REGIONS_vs_METAPODIAL	REGION
MA1587.1	BOTH_REGIONS	MA1587.1	ZNF135	64.1867	15.3956	0.29179	BOTH_REGIONS_vs_METAPODIAL	REGION
[truncated: 2,076 more rows]

## Sheet: All regions annotated hg38
chr	start	end	Number of peak sets containing peak	E54 Metatarsal 1	E54 Metatarsal 2	E54 Metatarsal 3	E54 Metatarsal 4	E54 Metatarsal 5	E54 Foot phalanges 1	E54 Foot phalanges 2	E54 Foot phalanges 3	E54 Foot phalanges 4	E54 Foot phalanges 5	E54 Metacarpal 1	E54 Metacarpal 2	E54 Metacarpal 3	E54 Metacarpal 4	E54 Metacarpal 5	E54 Hand phalanges 1	E54 Hand phalanges 2	E54 Hand phalanges 3	E54 Hand phalanges 4	E54 Hand phalanges 5	E67 Metatarsal 1	E67 Metatarsal 2	E67 Metatarsal 3	E67 Metatarsal 4	E67 Metatarsal 5	E67 Foot phalanges 1	E67 Foot phalanges 2	E67 Foot phalanges 3	E67 Foot phalanges 4	E67 Foot phalanges 5	E67 Metacarpal 1	E67 Metacarpal 2	E67 Metacarpal 3	E67 Metacarpal 4	E67 Metacarpal 5	E67 Hand phalanges 1	E67 Hand phalanges 2	E67 Hand phalanges 3	E67 Hand phalanges 4	E67 Hand phalanges 5	Overlap with non autopod skeletal elements	HARs	hCONDELs	HAQERs	Structurally divergent region	Human inversion
[truncated: 60,246 more rows]
[truncated: 1 more columns]
