# Supplementary material for: Complex genetic architecture underlies human hand and foot evolution
Source: Research Square preprint supplement (doi:10.21203/rs.3.rs-7124496/v1), 2025-08-18
Supplement: Supplementary file 6 [file a2d6778ffd20746d68c54f9d.xlsx]

## Sheet: Samples and Sequencing Info
Replicate	Age	Sample ID	Sex	Date of Collection	Sample Name	RIN Score	Library Preparation Method	i7	i7 Sequence	i5	i5 Sequence NovaSeq	Sequencing Platform	Read Type	Read Length	Sequencing Lane	Reads	Total Reads	% Bases >= Q30	Description
Early 1	E57	H28769	Female	2021-04-17	28769_HP1	8.3	Kapa mRNA Hyper prep (25 ng)	IDT_8nt_UDI_TruSeq_i7_56	GAAGTTGG	IDT_8nt_UDI_TruSeq_i5_56	CGAACAAC	MiSeq Nano	Paired End	150	1	4122	25111466	96.63	RNA-seq on Human E57 Skeletal Tissue
												NovaSeq S4	Paired End	100	4	3675440		93.88	RNA-seq on Human E57 Skeletal Tissue
												NovaSeq S4	Paired End	100	2	3201545		93.97	RNA-seq on Human E57 Skeletal Tissue
												NovaSeq S4	Paired End	100	3	3435355		93.93	RNA-seq on Human E57 Skeletal Tissue
												NovaSeq S4	Paired End	100	4	2377058		93.48	RNA-seq on Human E57 Skeletal Tissue
												NovaSeq S4	Paired End	100	2	5302980		93.53	RNA-seq on Human E57 Skeletal Tissue
												NovaSeq S4	Paired End	100	1	7114966		94.49	RNA-seq on Human E57 Skeletal Tissue
					28769_HP2	7.8	Kapa mRNA Hyper prep (25 ng)	IDT_8nt_UDI_TruSeq_i7_68	ACGTTCAG	IDT_8nt_UDI_TruSeq_i5_68	AGTTGTGC	MiSeq Nano	Paired End	150	1	3649	24277608	96.56	RNA-seq on Human E57 Skeletal Tissue
												NovaSeq S4	Paired End	100	4	3377804		93.53	RNA-seq on Human E57 Skeletal Tissue
												NovaSeq S4	Paired End	100	2	3351955		93.81	RNA-seq on Human E57 Skeletal Tissue
												NovaSeq S4	Paired End	100	3	3621682		93.76	RNA-seq on Human E57 Skeletal Tissue
												NovaSeq S4	Paired End	100	4	3134349		93.32	RNA-seq on Human E57 Skeletal Tissue
												NovaSeq S4	Paired End	100	2	4665652		93.56	RNA-seq on Human E57 Skeletal Tissue
												NovaSeq S4	Paired End	100	1	6122517		94.34	RNA-seq on Human E57 Skeletal Tissue
					28769_HP3	8.1	Kapa mRNA Hyper prep (25 ng)	IDT_8nt_UDI_TruSeq_i7_80	ATGCACGA	IDT_8nt_UDI_TruSeq_i5_80	AGATCGTC	MiSeq Nano	Paired End	150	1	3645	26186304	96.34	RNA-seq on Human E57 Skeletal Tissue
												NovaSeq S4	Paired End	100	4	3661718		93.65	RNA-seq on Human E57 Skeletal Tissue
												NovaSeq S4	Paired End	100	2	3579454		93.91	RNA-seq on Human E57 Skeletal Tissue
												NovaSeq S4	Paired End	100	3	3883867		93.81	RNA-seq on Human E57 Skeletal Tissue
												NovaSeq S4	Paired End	100	4	3346869		93.38	RNA-seq on Human E57 Skeletal Tissue
												NovaSeq S4	Paired End	100	2	5049076		93.41	RNA-seq on Human E57 Skeletal Tissue
												NovaSeq S4	Paired End	100	1	6661675		94.5	RNA-seq on Human E57 Skeletal Tissue
					28769_HP4	7.9	Kapa mRNA Hyper prep (25 ng)	IDT_8nt_UDI_TruSeq_i7_92	GAACATCG	IDT_8nt_UDI_TruSeq_i5_92	TCGACAAG	MiSeq Nano	Paired End	150	1	3787	21284844	97.13	RNA-seq on Human E57 Skeletal Tissue
												NovaSeq S4	Paired End	100	4	3165374		93.86	RNA-seq on Human E57 Skeletal Tissue
												NovaSeq S4	Paired End	100	2	2730654		94.13	RNA-seq on Human E57 Skeletal Tissue
												NovaSeq S4	Paired End	100	3	2927568		94.08	RNA-seq on Human E57 Skeletal Tissue
												NovaSeq S4	Paired End	100	4	2011390		93.69	RNA-seq on Human E57 Skeletal Tissue
												NovaSeq S4	Paired End	100	2	4520892		93.58	RNA-seq on Human E57 Skeletal Tissue
												NovaSeq S4	Paired End	100	1	5925179		94.57	RNA-seq on Human E57 Skeletal Tissue
					28769_HP5	8.2	Kapa mRNA Hyper prep (25 ng)	IDT_8nt_UDI_TruSeq_i7_9	CGGCTAAT	IDT_8nt_UDI_TruSeq_i5_9	CTCGTTCT	MiSeq Nano	Paired End	150	1	3808	26592845	96.71	RNA-seq on Human E57 Skeletal Tissue
												NovaSeq S4	Paired End	100	4	3721924		93.94	RNA-seq on Human E57 Skeletal Tissue
												NovaSeq S4	Paired End	100	2	3409713		94.15	RNA-seq on Human E57 Skeletal Tissue
												NovaSeq S4	Paired End	100	3	3976148		94.05	RNA-seq on Human E57 Skeletal Tissue
												NovaSeq S4	Paired End	100	4	3366495		93.65	RNA-seq on Human E57 Skeletal Tissue
												NovaSeq S4	Paired End	100	2	5311545		93.57	RNA-seq on Human E57 Skeletal Tissue
												NovaSeq S4	Paired End	100	1	6803212		94.69	RNA-seq on Human E57 Skeletal Tissue
					28769_HM1	8.1	Kapa mRNA Hyper prep (25 ng)	IDT_8nt_UDI_TruSeq_i7_21	GAATCCGA	IDT_8nt_UDI_TruSeq_i5_21	AGCTAGTG	MiSeq Nano	Paired End	150	1	4175	25460691	96.18	RNA-seq on Human E57 Skeletal Tissue
												NovaSeq S4	Paired End	100	4	3569230		93.36	RNA-seq on Human E57 Skeletal Tissue
												NovaSeq S4	Paired End	100	2	3443703		93.66	RNA-seq on Human E57 Skeletal Tissue
												NovaSeq S4	Paired End	100	3	3755886		93.58	RNA-seq on Human E57 Skeletal Tissue
												NovaSeq S4	Paired End	100	4	3201911		93.19	RNA-seq on Human E57 Skeletal Tissue
												NovaSeq S4	Paired End	100	2	5008480		93.15	RNA-seq on Human E57 Skeletal Tissue
												NovaSeq S4	Paired End	100	1	6477306		94.11	RNA-seq on Human E57 Skeletal Tissue
					28769_HM2	8.1	Kapa mRNA Hyper prep (25 ng)	IDT_8nt_UDI_TruSeq_i7_33	GTGAAGTG	IDT_8nt_UDI_TruSeq_i5_33	GAGCAATC	MiSeq Nano	Paired End	150	1	3646	21487073	96.72	RNA-seq on Human E57 Skeletal Tissue
												NovaSeq S4	Paired End	100	4	3259266		93.47	RNA-seq on Human E57 Skeletal Tissue
												NovaSeq S4	Paired End	100	2	2516939		93.84	RNA-seq on Human E57 Skeletal Tissue
												NovaSeq S4	Paired End	100	3	2923633		93.73	RNA-seq on Human E57 Skeletal Tissue
												NovaSeq S4	Paired End	100	4	1759055		93.43	RNA-seq on Human E57 Skeletal Tissue
												NovaSeq S4	Paired End	100	2	4676629		93.18	RNA-seq on Human E57 Skeletal Tissue
												NovaSeq S4	Paired End	100	1	6347905		94.22	RNA-seq on Human E57 Skeletal Tissue
					28769_HM3	7.7	Kapa mRNA Hyper prep (25 ng)	IDT_8nt_UDI_TruSeq_i7_45	GTTACGCA	IDT_8nt_UDI_TruSeq_i5_45	ATGGCGAT	MiSeq Nano	Paired End	150	1	4234	29387161	96.1	RNA-seq on Human E57 Skeletal Tissue
												NovaSeq S4	Paired End	100	4	4162345		93.29	RNA-seq on Human E57 Skeletal Tissue
												NovaSeq S4	Paired End	100	2	3897650		93.5	RNA-seq on Human E57 Skeletal Tissue
												NovaSeq S4	Paired End	100	3	4406025		93.44	RNA-seq on Human E57 Skeletal Tissue
												NovaSeq S4	Paired End	100	4	3759168		92.98	RNA-seq on Human E57 Skeletal Tissue
												NovaSeq S4	Paired End	100	2	5672062		93.05	RNA-seq on Human E57 Skeletal Tissue
												NovaSeq S4	Paired End	100	1	7485677		94.22	RNA-seq on Human E57 Skeletal Tissue
					28769_HM4	7.8	Kapa mRNA Hyper prep (25 ng)	IDT_8nt_UDI_TruSeq_i7_57	ATGACGTC	IDT_8nt_UDI_TruSeq_i5_57	CTTCCTTC	MiSeq Nano	Paired End	150	1	3104	18746054	97.19	RNA-seq on Human E57 Skeletal Tissue
												NovaSeq S4	Paired End	100	4	2741554		93.36	RNA-seq on Human E57 Skeletal Tissue
												NovaSeq S4	Paired End	100	2	2370319		93.79	RNA-seq on Human E57 Skeletal Tissue
												NovaSeq S4	Paired End	100	3	2654107		93.58	RNA-seq on Human E57 Skeletal Tissue
												NovaSeq S4	Paired End	100	4	2050296		93.25	RNA-seq on Human E57 Skeletal Tissue
												NovaSeq S4	Paired End	100	2	3819396		93.21	RNA-seq on Human E57 Skeletal Tissue
												NovaSeq S4	Paired End	100	1	5107278		94.24	RNA-seq on Human E57 Skeletal Tissue
					28769_HM5	8.1	Kapa mRNA Hyper prep (25 ng)	IDT_8nt_UDI_TruSeq_i7_69	CAGTCCAA	IDT_8nt_UDI_TruSeq_i5_69	CGGTAATC	MiSeq Nano	Paired End	150	1	4064	27901996	96.29	RNA-seq on Human E57 Skeletal Tissue
												NovaSeq S4	Paired End	100	4	3872594		93.23	RNA-seq on Human E57 Skeletal Tissue
												NovaSeq S4	Paired End	100	2	3838873		93.45	RNA-seq on Human E57 Skeletal Tissue
												NovaSeq S4	Paired End	100	3	4145992		93.37	RNA-seq on Human E57 Skeletal Tissue
												NovaSeq S4	Paired End	100	4	3588871		92.9	RNA-seq on Human E57 Skeletal Tissue
												NovaSeq S4	Paired End	100	2	5416263		92.98	RNA-seq on Human E57 Skeletal Tissue
												NovaSeq S4	Paired End	100	1	7035339		94.2	RNA-seq on Human E57 Skeletal Tissue
					28769_FP1	8.8	Kapa mRNA Hyper prep (25 ng)	IDT_8nt_UDI_TruSeq_i7_81	CGACGTTA	IDT_8nt_UDI_TruSeq_i5_81	CTCTGGAT	MiSeq Nano	Paired End	150	1	3273	25988180	97.83	RNA-seq on Human E57 Skeletal Tissue
												NovaSeq S4	Paired End	100	4	3671633		93.46	RNA-seq on Human E57 Skeletal Tissue
												NovaSeq S4	Paired End	100	2	3298154		93.75	RNA-seq on Human E57 Skeletal Tissue
												NovaSeq S4	Paired End	100	3	3851402		93.65	RNA-seq on Human E57 Skeletal Tissue
												NovaSeq S4	Paired End	100	4	3230749		93.22	RNA-seq on Human E57 Skeletal Tissue
												NovaSeq S4	Paired End	100	2	5221314		93.23	RNA-seq on Human E57 Skeletal Tissue
												NovaSeq S4	Paired End	100	1	6711655		94.33	RNA-seq on Human E57 Skeletal Tissue
					28769_FP2	8.3	Kapa mRNA Hyper prep (25 ng)	IDT_8nt_UDI_TruSeq_i7_93	TAACCGGT	IDT_8nt_UDI_TruSeq_i5_93	ATCGTCTC	MiSeq Nano	Paired End	150	1	4129	28380305	97.33	RNA-seq on Human E57 Skeletal Tissue
												NovaSeq S4	Paired End	100	4	4015041		93.18	RNA-seq on Human E57 Skeletal Tissue
												NovaSeq S4	Paired End	100	2	3620044		93.63	RNA-seq on Human E57 Skeletal Tissue
												NovaSeq S4	Paired End	100	3	4255078		93.36	RNA-seq on Human E57 Skeletal Tissue
												NovaSeq S4	Paired End	100	4	3579266		93	RNA-seq on Human E57 Skeletal Tissue
												NovaSeq S4	Paired End	100	2	5638728		92.97	RNA-seq on Human E57 Skeletal Tissue
												NovaSeq S4	Paired End	100	1	7268019		94.14	RNA-seq on Human E57 Skeletal Tissue
					28769_FP3	8.4	Kapa mRNA Hyper prep (25 ng)	IDT_8nt_UDI_TruSeq_i7_10	ATCGATCG	IDT_8nt_UDI_TruSeq_i5_10	TGGAAGCA	MiSeq Nano	Paired End	150	1	3371	18761211	96.88	RNA-seq on Human E57 Skeletal Tissue
												NovaSeq S4	Paired End	100	4	2945568		93.82	RNA-seq on Human E57 Skeletal Tissue
												NovaSeq S4	Paired End	100	2	2281907		94.2	RNA-seq on Human E57 Skeletal Tissue
												NovaSeq S4	Paired End	100	3	2476898		94.12	RNA-seq on Human E57 Skeletal Tissue
												NovaSeq S4	Paired End	100	4	1738714		93.73	RNA-seq on Human E57 Skeletal Tissue
												NovaSeq S4	Paired End	100	2	3589420		93.66	RNA-seq on Human E57 Skeletal Tissue
												NovaSeq S4	Paired End	100	1	5725333		94.4	RNA-seq on Human E57 Skeletal Tissue
					28769_FP4	8.6	Kapa mRNA Hyper prep (25 ng)	IDT_8nt_UDI_TruSeq_i7_22	TCGCTGTT	IDT_8nt_UDI_TruSeq_i5_22	CAAGTCGT	MiSeq Nano	Paired End	150	1	3405	25592117	96.09	RNA-seq on Human E57 Skeletal Tissue
												NovaSeq S4	Paired End	100	4	3821619		92.77	RNA-seq on Human E57 Skeletal Tissue
												NovaSeq S4	Paired End	100	2	3191028		93.24	RNA-seq on Human E57 Skeletal Tissue
												NovaSeq S4	Paired End	100	3	3514519		93.05	RNA-seq on Human E57 Skeletal Tissue
												NovaSeq S4	Paired End	100	4	2193508		92.78	RNA-seq on Human E57 Skeletal Tissue
												NovaSeq S4	Paired End	100	2	5518357		92.57	RNA-seq on Human E57 Skeletal Tissue
												NovaSeq S4	Paired End	100	1	7349681		93.48	RNA-seq on Human E57 Skeletal Tissue
					28769_FP5	8.5	Kapa mRNA Hyper prep (25 ng)	IDT_8nt_UDI_TruSeq_i7_34	CATGGCTA	IDT_8nt_UDI_TruSeq_i5_34	CACACATC	MiSeq Nano	Paired End	150	1	3630	21904377	96.66	RNA-seq on Human E57 Skeletal Tissue
												NovaSeq S4	Paired End	100	4	3255981		93.53	RNA-seq on Human E57 Skeletal Tissue
												NovaSeq S4	Paired End	100	2	2662388		93.73	RNA-seq on Human E57 Skeletal Tissue
												NovaSeq S4	Paired End	100	3	2950604		93.64	RNA-seq on Human E57 Skeletal Tissue
												NovaSeq S4	Paired End	100	4	1746669		93.24	RNA-seq on Human E57 Skeletal Tissue
												NovaSeq S4	Paired End	100	2	4825833		92.99	RNA-seq on Human E57 Skeletal Tissue
												NovaSeq S4	Paired End	100	1	6459272		94.29	RNA-seq on Human E57 Skeletal Tissue
					28769_FM1	8.1	Kapa mRNA Hyper prep (25 ng)	IDT_8nt_UDI_TruSeq_i7_46	AGCGTGTT	IDT_8nt_UDI_TruSeq_i5_46	CTTCGCAA	MiSeq Nano	Paired End	150	1	3348	28130306	97.13	RNA-seq on Human E57 Skeletal Tissue
												NovaSeq S4	Paired End	100	4	4013997		93	RNA-seq on Human E57 Skeletal Tissue
												NovaSeq S4	Paired End	100	2	3596377		93.37	RNA-seq on Human E57 Skeletal Tissue
												NovaSeq S4	Paired End	100	3	4119473		93.2	RNA-seq on Human E57 Skeletal Tissue
												NovaSeq S4	Paired End	100	4	3354510		92.87	RNA-seq on Human E57 Skeletal Tissue
												NovaSeq S4	Paired End	100	2	5632542		92.94	RNA-seq on Human E57 Skeletal Tissue
												NovaSeq S4	Paired End	100	1	7410059		93.95	RNA-seq on Human E57 Skeletal Tissue
					28769_FM2	8.5	Kapa mRNA Hyper prep (25 ng)	IDT_8nt_UDI_TruSeq_i7_58	TTGGACGT	IDT_8nt_UDI_TruSeq_i5_58	GAAGTGCT	MiSeq Nano	Paired End	150	1	4120	26427945	97.25	RNA-seq on Human E57 Skeletal Tissue
												NovaSeq S4	Paired End	100	4	3962177		93.67	RNA-seq on Human E57 Skeletal Tissue
												NovaSeq S4	Paired End	100	2	3020423		94.12	RNA-seq on Human E57 Skeletal Tissue
												NovaSeq S4	Paired End	100	3	3561587		93.98	RNA-seq on Human E57 Skeletal Tissue
												NovaSeq S4	Paired End	100	4	2125139		93.72	RNA-seq on Human E57 Skeletal Tissue
												NovaSeq S4	Paired End	100	2	5827980		93.36	RNA-seq on Human E57 Skeletal Tissue
												NovaSeq S4	Paired End	100	1	7926519		94.28	RNA-seq on Human E57 Skeletal Tissue
					28769_FM3	8.1	Kapa mRNA Hyper prep (25 ng)	IDT_8nt_UDI_TruSeq_i7_70	TTGCAGAC	IDT_8nt_UDI_TruSeq_i5_70	ATCGTGGT	MiSeq Nano	Paired End	150	1	3659	25428987	96.89	RNA-seq on Human E57 Skeletal Tissue
												NovaSeq S4	Paired End	100	4	3612722		93.35	RNA-seq on Human E57 Skeletal Tissue
												NovaSeq S4	Paired End	100	2	3148324		93.83	RNA-seq on Human E57 Skeletal Tissue
												NovaSeq S4	Paired End	100	3	3736458		93.61	RNA-seq on Human E57 Skeletal Tissue
												NovaSeq S4	Paired End	100	4	3041141		93.31	RNA-seq on Human E57 Skeletal Tissue
												NovaSeq S4	Paired End	100	2	5102732		93.15	RNA-seq on Human E57 Skeletal Tissue
												NovaSeq S4	Paired End	100	1	6783951		94.17	RNA-seq on Human E57 Skeletal Tissue
					28769_FM4	8.3	Kapa mRNA Hyper prep (25 ng)	IDT_8nt_UDI_TruSeq_i7_82	TACGCCTT	IDT_8nt_UDI_TruSeq_i5_82	GCTACTCT	MiSeq Nano	Paired End	150	1	3967	34603075	97.51	RNA-seq on Human E57 Skeletal Tissue
												NovaSeq S4	Paired End	100	4	5209945		93.8	RNA-seq on Human E57 Skeletal Tissue
												NovaSeq S4	Paired End	100	2	4367701		94.01	RNA-seq on Human E57 Skeletal Tissue
												NovaSeq S4	Paired End	100	3	4716749		93.94	RNA-seq on Human E57 Skeletal Tissue
												NovaSeq S4	Paired End	100	4	3180895		93.59	RNA-seq on Human E57 Skeletal Tissue
												NovaSeq S4	Paired End	100	2	7422177		93.38	RNA-seq on Human E57 Skeletal Tissue
												NovaSeq S4	Paired End	100	1	9701641		94.52	RNA-seq on Human E57 Skeletal Tissue
					28769_FM5	8	Kapa mRNA Hyper prep (25 ng)	IDT_8nt_UDI_TruSeq_i7_94	AACCGTTC	IDT_8nt_UDI_TruSeq_i5_94	CTAGCTCA	MiSeq Nano	Paired End	150	1	3734	27675582	97.92	RNA-seq on Human E57 Skeletal Tissue
												NovaSeq S4	Paired End	100	4	3896713		94.11	RNA-seq on Human E57 Skeletal Tissue
												NovaSeq S4	Paired End	100	2	3607588		94.31	RNA-seq on Human E57 Skeletal Tissue
												NovaSeq S4	Paired End	100	3	4164669		94.18	RNA-seq on Human E57 Skeletal Tissue
												NovaSeq S4	Paired End	100	4	3536012		93.79	RNA-seq on Human E57 Skeletal Tissue
												NovaSeq S4	Paired End	100	2	5457357		93.86	RNA-seq on Human E57 Skeletal Tissue
												NovaSeq S4	Paired End	100	1	7009509		94.79	RNA-seq on Human E57 Skeletal Tissue
Late 1	E67	H28743	Male	2021-03-27	H28743_HP1	7.2	Kapa mRNA Hyper prep (25 ng)	IDT_8nt_UDI_TruSeq_i7_100	CTCATCAG	IDT_8nt_UDI_TruSeq_i5_100	TACTAGCG	MiSeq Nano	Paired End	150	1	4458	21317743	93.67	RNA-seq on Human E67 Skeletal Tissue	2
												NovaSeq S4	Paired End	100	4	2506299		91.68	RNA-seq on Human E67 Skeletal Tissue	2
												NovaSeq S4	Paired End	100	2	2135540		91.94	RNA-seq on Human E67 Skeletal Tissue	2
												NovaSeq S4	Paired End	100	3	2360867		91.86	RNA-seq on Human E67 Skeletal Tissue	2
												NovaSeq S4	Paired End	100	4	1456989		91.43	RNA-seq on Human E67 Skeletal Tissue	2
												NovaSeq S4	Paired End	100	2	5621661		91.57	RNA-seq on Human E67 Skeletal Tissue	2
												NovaSeq S4	Paired End	100	1	7231929		92.63	RNA-seq on Human E67 Skeletal Tissue	2
					H28743_HP2	7.8	Kapa mRNA Hyper prep (25 ng)	IDT_8nt_UDI_TruSeq_i7_112	TAGAGCTC	IDT_8nt_UDI_TruSeq_i5_112	AGAAGCCT	MiSeq Nano	Paired End	150	1	6018	33282830	91.76	RNA-seq on Human E67 Skeletal Tissue	3
												NovaSeq S4	Paired End	100	4	4024274		91.21	RNA-seq on Human E67 Skeletal Tissue	3
												NovaSeq S4	Paired End	100	2	3481353		91.48	RNA-seq on Human E67 Skeletal Tissue	3
												NovaSeq S4	Paired End	100	3	3740853		91.37	RNA-seq on Human E67 Skeletal Tissue	3
												NovaSeq S4	Paired End	100	4	2607454		90.99	RNA-seq on Human E67 Skeletal Tissue	3
												NovaSeq S4	Paired End	100	2	8208138		91.52	RNA-seq on Human E67 Skeletal Tissue	3
												NovaSeq S4	Paired End	100	1	11214740		91.85	RNA-seq on Human E67 Skeletal Tissue	3
					H28743_HP3	7.2	Kapa mRNA Hyper prep (25 ng)	IDT_8nt_UDI_TruSeq_i7_124	AGTTACGG	IDT_8nt_UDI_TruSeq_i5_124	GAGACCAA	MiSeq Nano	Paired End	150	1	4686	29397424	93	RNA-seq on Human E67 Skeletal Tissue	4
												NovaSeq S4	Paired End	100	4	3526474		91.59	RNA-seq on Human E67 Skeletal Tissue	4
												NovaSeq S4	Paired End	100	2	2894891		91.98	RNA-seq on Human E67 Skeletal Tissue	4
												NovaSeq S4	Paired End	100	3	3221923		91.85	RNA-seq on Human E67 Skeletal Tissue	4
												NovaSeq S4	Paired End	100	4	1905108		91.48	RNA-seq on Human E67 Skeletal Tissue	4
												NovaSeq S4	Paired End	100	2	7646257		91.6	RNA-seq on Human E67 Skeletal Tissue	4
												NovaSeq S4	Paired End	100	1	10198085		92.44	RNA-seq on Human E67 Skeletal Tissue	4
					H28743_HP4	7.3	Kapa mRNA Hyper prep (25 ng)	IDT_8nt_UDI_TruSeq_i7_136	GCTGACTA	IDT_8nt_UDI_TruSeq_i5_136	GACATCTC	MiSeq Nano	Paired End	150	1	5396	24941707	95.06	RNA-seq on Human E67 Skeletal Tissue	5
												NovaSeq S4	Paired End	100	4	2929617		92.6	RNA-seq on Human E67 Skeletal Tissue	5
												NovaSeq S4	Paired End	100	2	2311672		92.99	RNA-seq on Human E67 Skeletal Tissue	5
												NovaSeq S4	Paired End	100	3	2611786		92.89	RNA-seq on Human E67 Skeletal Tissue	5
												NovaSeq S4	Paired End	100	4	1513190		92.5	RNA-seq on Human E67 Skeletal Tissue	5
												NovaSeq S4	Paired End	100	2	6651798		92.26	RNA-seq on Human E67 Skeletal Tissue	5
												NovaSeq S4	Paired End	100	1	8918248		93.25	RNA-seq on Human E67 Skeletal Tissue	5
					H28743_HP5	6.4	Kapa mRNA Hyper prep (25 ng)	IDT_8nt_UDI_TruSeq_i7_148	TCGCATTG	IDT_8nt_UDI_TruSeq_i5_148	ACAGCAAG	MiSeq Nano	Paired End	150	1	5074	29171887	94.31	RNA-seq on Human E67 Skeletal Tissue	6
												NovaSeq S4	Paired End	100	4	3420426		92	RNA-seq on Human E67 Skeletal Tissue	6
												NovaSeq S4	Paired End	100	2	3367005		92.36	RNA-seq on Human E67 Skeletal Tissue	6
												NovaSeq S4	Paired End	100	3	3294779		92.26	RNA-seq on Human E67 Skeletal Tissue	6
												NovaSeq S4	Paired End	100	4	2561324		91.82	RNA-seq on Human E67 Skeletal Tissue	6
												NovaSeq S4	Paired End	100	2	7115366		92	RNA-seq on Human E67 Skeletal Tissue	6
												NovaSeq S4	Paired End	100	1	9407913		92.96	RNA-seq on Human E67 Skeletal Tissue	6
					H28743_HM1	7.1	Kapa mRNA Hyper prep (25 ng)	IDT_8nt_UDI_TruSeq_i7_160	TCGTCTCA	IDT_8nt_UDI_TruSeq_i5_160	AACGCACA	MiSeq Nano	Paired End	150	1	4807	26748131	95.38	RNA-seq on Human E67 Skeletal Tissue	7
												NovaSeq S4	Paired End	100	4	3165929		92.41	RNA-seq on Human E67 Skeletal Tissue	7
												NovaSeq S4	Paired End	100	2	2622902		92.83	RNA-seq on Human E67 Skeletal Tissue	7
												NovaSeq S4	Paired End	100	3	2921596		92.63	RNA-seq on Human E67 Skeletal Tissue	7
												NovaSeq S4	Paired End	100	4	1777422		92.24	RNA-seq on Human E67 Skeletal Tissue	7
												NovaSeq S4	Paired End	100	2	6951586		92.25	RNA-seq on Human E67 Skeletal Tissue	7
												NovaSeq S4	Paired End	100	1	9303889		93.24	RNA-seq on Human E67 Skeletal Tissue	7
					H28743_HM2	7.9	Kapa mRNA Hyper prep (25 ng)	IDT_8nt_UDI_TruSeq_i7_172	AACGTGGA	IDT_8nt_UDI_TruSeq_i5_172	CCGATGTA	MiSeq Nano	Paired End	150	1	5622	30763797	95.49	RNA-seq on Human E67 Skeletal Tissue	8
												NovaSeq S4	Paired End	100	4	3650509		92.5	RNA-seq on Human E67 Skeletal Tissue	8
												NovaSeq S4	Paired End	100	2	3104801		92.96	RNA-seq on Human E67 Skeletal Tissue	8
												NovaSeq S4	Paired End	100	3	3323558		92.77	RNA-seq on Human E67 Skeletal Tissue	8
												NovaSeq S4	Paired End	100	4	2219991		92.4	RNA-seq on Human E67 Skeletal Tissue	8
												NovaSeq S4	Paired End	100	2	7857286		92.41	RNA-seq on Human E67 Skeletal Tissue	8
												NovaSeq S4	Paired End	100	1	10602030		93.38	RNA-seq on Human E67 Skeletal Tissue	8
					H28743_HM3	7.3	Kapa mRNA Hyper prep (25 ng)	IDT_8nt_UDI_TruSeq_i7_184	ACCTCTGT	IDT_8nt_UDI_TruSeq_i5_184	ATGCCTAG	MiSeq Nano	Paired End	150	1	5921	33993334	94.83	RNA-seq on Human E67 Skeletal Tissue	9
												NovaSeq S4	Paired End	100	4	3975482		92.27	RNA-seq on Human E67 Skeletal Tissue	9
												NovaSeq S4	Paired End	100	2	3525083		92.79	RNA-seq on Human E67 Skeletal Tissue	9
												NovaSeq S4	Paired End	100	3	4058319		92.62	RNA-seq on Human E67 Skeletal Tissue	9
												NovaSeq S4	Paired End	100	4	3295950		92.3	RNA-seq on Human E67 Skeletal Tissue	9
												NovaSeq S4	Paired End	100	2	8121696		92.46	RNA-seq on Human E67 Skeletal Tissue	9
												NovaSeq S4	Paired End	100	1	11010883		93.14	RNA-seq on Human E67 Skeletal Tissue	9
					H28743_HM4	7.2	Kapa mRNA Hyper prep (25 ng)	IDT_8nt_UDI_TruSeq_i7_101	TGTACCGT	IDT_8nt_UDI_TruSeq_i5_101	CCTAGAGA	MiSeq Nano	Paired End	150	1	5153	31513649	95.25	RNA-seq on Human E67 Skeletal Tissue	10
												NovaSeq S4	Paired End	100	4	3736379		92.41	RNA-seq on Human E67 Skeletal Tissue	10
												NovaSeq S4	Paired End	100	2	3212812		92.85	RNA-seq on Human E67 Skeletal Tissue	10
												NovaSeq S4	Paired End	100	3	3464020		92.67	RNA-seq on Human E67 Skeletal Tissue	10
												NovaSeq S4	Paired End	100	4	2335240		92.3	RNA-seq on Human E67 Skeletal Tissue	10
												NovaSeq S4	Paired End	100	2	8058959		92.41	RNA-seq on Human E67 Skeletal Tissue	10
												NovaSeq S4	Paired End	100	1	10701086		93.29	RNA-seq on Human E67 Skeletal Tissue	10
					H28743_HM5	7.5	Kapa mRNA Hyper prep (25 ng)	IDT_8nt_UDI_TruSeq_i7_113	TGACTGAC	IDT_8nt_UDI_TruSeq_i5_113	CAGAACTG	MiSeq Nano	Paired End	150	1	5528	30567345	96.04	RNA-seq on Human E67 Skeletal Tissue	11
												NovaSeq S4	Paired End	100	4	3635968		92.73	RNA-seq on Human E67 Skeletal Tissue	11
												NovaSeq S4	Paired End	100	2	3000249		93.1	RNA-seq on Human E67 Skeletal Tissue	11
												NovaSeq S4	Paired End	100	3	3314440		92.97	RNA-seq on Human E67 Skeletal Tissue	11
												NovaSeq S4	Paired End	100	4	1946951		92.59	RNA-seq on Human E67 Skeletal Tissue	11
												NovaSeq S4	Paired End	100	2	8062529		92.43	RNA-seq on Human E67 Skeletal Tissue	11
												NovaSeq S4	Paired End	100	1	10601680		93.53	RNA-seq on Human E67 Skeletal Tissue	11
					H28743_FP1	6.8	Kapa mRNA Hyper prep (25 ng)	IDT_8nt_UDI_TruSeq_i7_125	GTGTCTGA	IDT_8nt_UDI_TruSeq_i5_125	ATAGTCGG	MiSeq Nano	Paired End	150	1	5036	29262359	93.94	RNA-seq on Human E67 Skeletal Tissue	12
												NovaSeq S4	Paired End	100	4	3358204		91.52	RNA-seq on Human E67 Skeletal Tissue	12
												NovaSeq S4	Paired End	100	2	2988529		92.04	RNA-seq on Human E67 Skeletal Tissue	12
												NovaSeq S4	Paired End	100	3	3562222		91.77	RNA-seq on Human E67 Skeletal Tissue	12
												NovaSeq S4	Paired End	100	4	2906519		91.5	RNA-seq on Human E67 Skeletal Tissue	12
												NovaSeq S4	Paired End	100	2	7051956		91.63	RNA-seq on Human E67 Skeletal Tissue	12
												NovaSeq S4	Paired End	100	1	9389893		92.51	RNA-seq on Human E67 Skeletal Tissue	12
					H28743_FP2	8.2	Kapa mRNA Hyper prep (25 ng)	IDT_8nt_UDI_TruSeq_i7_137	GTGGTGTT	IDT_8nt_UDI_TruSeq_i5_137	GCTGTAAG	MiSeq Nano	Paired End	150	1	5207	32261439	95.22	RNA-seq on Human E67 Skeletal Tissue	13
												NovaSeq S4	Paired End	100	4	3872201		92.35	RNA-seq on Human E67 Skeletal Tissue	13
												NovaSeq S4	Paired End	100	2	3476041		92.83	RNA-seq on Human E67 Skeletal Tissue	13
												NovaSeq S4	Paired End	100	3	3603274		92.65	RNA-seq on Human E67 Skeletal Tissue	13
												NovaSeq S4	Paired End	100	4	2441686		92.34	RNA-seq on Human E67 Skeletal Tissue	13
												NovaSeq S4	Paired End	100	2	7945203		92.42	RNA-seq on Human E67 Skeletal Tissue	13
												NovaSeq S4	Paired End	100	1	10917827		93.22	RNA-seq on Human E67 Skeletal Tissue	13
					H28743_FP3	5.9	Kapa mRNA Hyper prep (25 ng)	IDT_8nt_UDI_TruSeq_i7_149	TGACGCAT	IDT_8nt_UDI_TruSeq_i5_149	TCAGTAGG	MiSeq Nano	Paired End	150	1	5086	41777687	95.71	RNA-seq on Human E67 Skeletal Tissue	14
												NovaSeq S4	Paired End	100	4	4940729		92.91	RNA-seq on Human E67 Skeletal Tissue	14
												NovaSeq S4	Paired End	100	2	4604928		93.39	RNA-seq on Human E67 Skeletal Tissue	14
												NovaSeq S4	Paired End	100	3	4586328		93.25	RNA-seq on Human E67 Skeletal Tissue	14
												NovaSeq S4	Paired End	100	4	3288345		92.91	RNA-seq on Human E67 Skeletal Tissue	14
												NovaSeq S4	Paired End	100	2	10476529		92.83	RNA-seq on Human E67 Skeletal Tissue	14
												NovaSeq S4	Paired End	100	1	13875742		93.71	RNA-seq on Human E67 Skeletal Tissue	14
					H28743_FP4	7.7	Kapa mRNA Hyper prep (25 ng)	IDT_8nt_UDI_TruSeq_i7_161	TTCCTGTG	IDT_8nt_UDI_TruSeq_i5_161	CTCCTGAA	MiSeq Nano	Paired End	150	1	4773	25857206	95.48	RNA-seq on Human E67 Skeletal Tissue	15
												NovaSeq S4	Paired End	100	4	2974088		92.43	RNA-seq on Human E67 Skeletal Tissue	15
												NovaSeq S4	Paired End	100	2	2618631		92.78	RNA-seq on Human E67 Skeletal Tissue	15
												NovaSeq S4	Paired End	100	3	2880323		92.61	RNA-seq on Human E67 Skeletal Tissue	15
												NovaSeq S4	Paired End	100	4	2131892		92.21	RNA-seq on Human E67 Skeletal Tissue	15
												NovaSeq S4	Paired End	100	2	6457845		92.26	RNA-seq on Human E67 Skeletal Tissue	15
												NovaSeq S4	Paired End	100	1	8789654		93.24	RNA-seq on Human E67 Skeletal Tissue	15
					H28743_FP5	7.8	Kapa mRNA Hyper prep (25 ng)	IDT_8nt_UDI_TruSeq_i7_173	GTTGCGAT	IDT_8nt_UDI_TruSeq_i5_173	GACTTGTG	MiSeq Nano	Paired End	150	1	5614	34570380	95.31	RNA-seq on Human E67 Skeletal Tissue	16
												NovaSeq S4	Paired End	100	4	4187671		92.97	RNA-seq on Human E67 Skeletal Tissue	16
												NovaSeq S4	Paired End	100	2	3361086		93.44	RNA-seq on Human E67 Skeletal Tissue	16
												NovaSeq S4	Paired End	100	3	3801671		93.32	RNA-seq on Human E67 Skeletal Tissue	16
												NovaSeq S4	Paired End	100	4	2326492		93.07	RNA-seq on Human E67 Skeletal Tissue	16
												NovaSeq S4	Paired End	100	2	8851746		92.82	RNA-seq on Human E67 Skeletal Tissue	16
												NovaSeq S4	Paired End	100	1	12036100		93.67	RNA-seq on Human E67 Skeletal Tissue	16
					H28743_FM1	7	Kapa mRNA Hyper prep (25 ng)	IDT_8nt_UDI_TruSeq_i7_185	GCCACTTA	IDT_8nt_UDI_TruSeq_i5_185	GAGTAGAG	MiSeq Nano	Paired End	150	1	5753	28283420	94.94	RNA-seq on Human E67 Skeletal Tissue	17
												NovaSeq S4	Paired End	100	4	3351589		92.52	RNA-seq on Human E67 Skeletal Tissue	17
												NovaSeq S4	Paired End	100	2	2678453		92.92	RNA-seq on Human E67 Skeletal Tissue	17
												NovaSeq S4	Paired End	100	3	3078716		92.85	RNA-seq on Human E67 Skeletal Tissue	17
												NovaSeq S4	Paired End	100	4	1861932		92.47	RNA-seq on Human E67 Skeletal Tissue	17
												NovaSeq S4	Paired End	100	2	7415143		92.32	RNA-seq on Human E67 Skeletal Tissue	17
												NovaSeq S4	Paired End	100	1	9891834		93.31	RNA-seq on Human E67 Skeletal Tissue	17
					H28743_FM2	6.6	Kapa mRNA Hyper prep (25 ng)	IDT_8nt_UDI_TruSeq_i7_102	AAGTCGAG	IDT_8nt_UDI_TruSeq_i5_102	CGCAATGT	MiSeq Nano	Paired End	150	1	4732	28649907	94.37	RNA-seq on Human E67 Skeletal Tissue	18
												NovaSeq S4	Paired End	100	4	3426845		92.06	RNA-seq on Human E67 Skeletal Tissue	18
												NovaSeq S4	Paired End	100	2	2975414		92.39	RNA-seq on Human E67 Skeletal Tissue	18
												NovaSeq S4	Paired End	100	3	3164750		92.24	RNA-seq on Human E67 Skeletal Tissue	18
												NovaSeq S4	Paired End	100	4	2180085		91.9	RNA-seq on Human E67 Skeletal Tissue	18
												NovaSeq S4	Paired End	100	2	7063119		92.17	RNA-seq on Human E67 Skeletal Tissue	18
												NovaSeq S4	Paired End	100	1	9834962		92.69	RNA-seq on Human E67 Skeletal Tissue	18
					H28743_FM3	7.6	Kapa mRNA Hyper prep (25 ng)	IDT_8nt_UDI_TruSeq_i7_114	TAGACGTG	IDT_8nt_UDI_TruSeq_i5_114	CTCACCAA	MiSeq Nano	Paired End	150	1	5190	31002514	92.21	RNA-seq on Human E67 Skeletal Tissue	19
												NovaSeq S4	Paired End	100	4	3657297		90.72	RNA-seq on Human E67 Skeletal Tissue	19
												NovaSeq S4	Paired End	100	2	3257841		90.9	RNA-seq on Human E67 Skeletal Tissue	19
												NovaSeq S4	Paired End	100	3	3470979		90.79	RNA-seq on Human E67 Skeletal Tissue	19
												NovaSeq S4	Paired End	100	4	2423832		90.29	RNA-seq on Human E67 Skeletal Tissue	19
												NovaSeq S4	Paired End	100	2	7785836		90.84	RNA-seq on Human E67 Skeletal Tissue	19
												NovaSeq S4	Paired End	100	1	10401539		91.69	RNA-seq on Human E67 Skeletal Tissue	19
					H28743_FM4	7.8	Kapa mRNA Hyper prep (25 ng)	IDT_8nt_UDI_TruSeq_i7_126	TGACTTCG	IDT_8nt_UDI_TruSeq_i5_126	CTTAGGAC	MiSeq Nano	Paired End	150	1	5064	24827672	95.6	RNA-seq on Human E67 Skeletal Tissue	20
												NovaSeq S4	Paired End	100	4	2930916		92.82	RNA-seq on Human E67 Skeletal Tissue	20
												NovaSeq S4	Paired End	100	2	2552864		93.09	RNA-seq on Human E67 Skeletal Tissue	20
												NovaSeq S4	Paired End	100	3	2761329		93.03	RNA-seq on Human E67 Skeletal Tissue	20
												NovaSeq S4	Paired End	100	4	1898735		92.61	RNA-seq on Human E67 Skeletal Tissue	20
												NovaSeq S4	Paired End	100	2	6407410		92.67	RNA-seq on Human E67 Skeletal Tissue	20
												NovaSeq S4	Paired End	100	1	8271354		93.63	RNA-seq on Human E67 Skeletal Tissue	20
					H28743_FM5	7	Kapa mRNA Hyper prep (25 ng)	IDT_8nt_UDI_TruSeq_i7_138	GTGCTTAC	IDT_8nt_UDI_TruSeq_i5_138	TTCCTCCT	MiSeq Nano	Paired End	150	1	5237	29794736	93.76	RNA-seq on Human E67 Skeletal Tissue	21
												NovaSeq S4	Paired End	100	4	3515849		91.97	RNA-seq on Human E67 Skeletal Tissue	21
												NovaSeq S4	Paired End	100	2	3090433		92.28	RNA-seq on Human E67 Skeletal Tissue	21
												NovaSeq S4	Paired End	100	3	3428720		92.16	RNA-seq on Human E67 Skeletal Tissue	21
												NovaSeq S4	Paired End	100	4	2627764		91.81	RNA-seq on Human E67 Skeletal Tissue	21
												NovaSeq S4	Paired End	100	2	7415172		91.94	RNA-seq on Human E67 Skeletal Tissue	21
												NovaSeq S4	Paired End	100	1	9711561		92.78	RNA-seq on Human E67 Skeletal Tissue	21
																				22
Late 2	E67	H28670	Male	2021-01-07	H28670_HP1	7.3	Kapa mRNA Hyper prep (25 ng)	IDT_8nt_UDI_TruSeq_i7_150	CCGATGTA	IDT_8nt_UDI_TruSeq_i5_150	CAACTTGG	MiSeq Nano	Paired End	150	1	5192	28738481	94.58	RNA-seq on Human E67 Skeletal Tissue	23
												NovaSeq S4	Paired End	100	4	3386630		92.44	RNA-seq on Human E67 Skeletal Tissue	23
												NovaSeq S4	Paired End	100	2	2815222		92.71	RNA-seq on Human E67 Skeletal Tissue	23
												NovaSeq S4	Paired End	100	3	3121056		92.68	RNA-seq on Human E67 Skeletal Tissue	23
												NovaSeq S4	Paired End	100	4	1916393		92.29	RNA-seq on Human E67 Skeletal Tissue	23
												NovaSeq S4	Paired End	100	2	7354113		92.37	RNA-seq on Human E67 Skeletal Tissue	23
												NovaSeq S4	Paired End	100	1	10139875		93.16	RNA-seq on Human E67 Skeletal Tissue	23
					H28670_HP2	7.5	Kapa mRNA Hyper prep (25 ng)	IDT_8nt_UDI_TruSeq_i7_162	CGTTGAGT	IDT_8nt_UDI_TruSeq_i5_162	GCATAGTC	MiSeq Nano	Paired End	150	1	5135	27674868	94.56	RNA-seq on Human E67 Skeletal Tissue	24
												NovaSeq S4	Paired End	100	4	3228529		92.35	RNA-seq on Human E67 Skeletal Tissue	24
												NovaSeq S4	Paired End	100	2	3056795		92.8	RNA-seq on Human E67 Skeletal Tissue	24
												NovaSeq S4	Paired End	100	3	3108028		92.61	RNA-seq on Human E67 Skeletal Tissue	24
												NovaSeq S4	Paired End	100	4	2240040		92.32	RNA-seq on Human E67 Skeletal Tissue	24
												NovaSeq S4	Paired End	100	2	6883520		92.23	RNA-seq on Human E67 Skeletal Tissue	24
												NovaSeq S4	Paired End	100	1	9152821		93.22	RNA-seq on Human E67 Skeletal Tissue	24
					H28670_HP3	7.8	Kapa mRNA Hyper prep (25 ng)	IDT_8nt_UDI_TruSeq_i7_174	AACGACGT	IDT_8nt_UDI_TruSeq_i5_174	TCAATCCG	MiSeq Nano	Paired End	150	1	5593	30354132	96.3	RNA-seq on Human E67 Skeletal Tissue	25
												NovaSeq S4	Paired End	100	4	3625608		92.92	RNA-seq on Human E67 Skeletal Tissue	25
												NovaSeq S4	Paired End	100	2	3104549		93.29	RNA-seq on Human E67 Skeletal Tissue	25
												NovaSeq S4	Paired End	100	3	3310943		93.17	RNA-seq on Human E67 Skeletal Tissue	25
												NovaSeq S4	Paired End	100	4	2268546		92.78	RNA-seq on Human E67 Skeletal Tissue	25
												NovaSeq S4	Paired End	100	2	7685865		92.74	RNA-seq on Human E67 Skeletal Tissue	25
												NovaSeq S4	Paired End	100	1	10353028		93.75	RNA-seq on Human E67 Skeletal Tissue	25
					H28670_HP4	7.8	Kapa mRNA Hyper prep (25 ng)	IDT_8nt_UDI_TruSeq_i7_186	ACCTGACT	IDT_8nt_UDI_TruSeq_i5_186	ACGCTTCT	MiSeq Nano	Paired End	150	1	6515	33662831	95.32	RNA-seq on Human E67 Skeletal Tissue	26
												NovaSeq S4	Paired End	100	4	4007436		92.47	RNA-seq on Human E67 Skeletal Tissue	26
												NovaSeq S4	Paired End	100	2	3469557		92.98	RNA-seq on Human E67 Skeletal Tissue	26
												NovaSeq S4	Paired End	100	3	3739715		92.79	RNA-seq on Human E67 Skeletal Tissue	26
												NovaSeq S4	Paired End	100	4	2656985		92.47	RNA-seq on Human E67 Skeletal Tissue	26
												NovaSeq S4	Paired End	100	2	8493219		92.44	RNA-seq on Human E67 Skeletal Tissue	26
												NovaSeq S4	Paired End	100	1	11289404		93.37	RNA-seq on Human E67 Skeletal Tissue	26
					H28670_HP5	6.5	Kapa mRNA Hyper prep (25 ng)	IDT_8nt_UDI_TruSeq_i7_103	CACGTTGT	IDT_8nt_UDI_TruSeq_i5_103	ACACCTCA	MiSeq Nano	Paired End	150	1	4643	30517576	95.71	RNA-seq on Human E67 Skeletal Tissue	27
												NovaSeq S4	Paired End	100	4	3566006		92.07	RNA-seq on Human E67 Skeletal Tissue	27
												NovaSeq S4	Paired End	100	2	3180931		92.43	RNA-seq on Human E67 Skeletal Tissue	27
												NovaSeq S4	Paired End	100	3	3428367		92.21	RNA-seq on Human E67 Skeletal Tissue	27
												NovaSeq S4	Paired End	100	4	2580972		91.86	RNA-seq on Human E67 Skeletal Tissue	27
												NovaSeq S4	Paired End	100	2	7657896		91.96	RNA-seq on Human E67 Skeletal Tissue	27
												NovaSeq S4	Paired End	100	1	10098761		92.99	RNA-seq on Human E67 Skeletal Tissue	27
					H28670_HM1	7.8	Kapa mRNA Hyper prep (25 ng)	IDT_8nt_UDI_TruSeq_i7_115	CCGGAATT	IDT_8nt_UDI_TruSeq_i5_115	ACCGAATG	MiSeq Nano	Paired End	150	1	5332	34587537	95.58	RNA-seq on Human E67 Skeletal Tissue	28
												NovaSeq S4	Paired End	100	4	4053601		92.66	RNA-seq on Human E67 Skeletal Tissue	28
												NovaSeq S4	Paired End	100	2	3925192		93.05	RNA-seq on Human E67 Skeletal Tissue	28
												NovaSeq S4	Paired End	100	3	3831746		92.95	RNA-seq on Human E67 Skeletal Tissue	28
												NovaSeq S4	Paired End	100	4	2850575		92.57	RNA-seq on Human E67 Skeletal Tissue	28
												NovaSeq S4	Paired End	100	2	8568284		92.58	RNA-seq on Human E67 Skeletal Tissue	28
												NovaSeq S4	Paired End	100	1	11352807		93.44	RNA-seq on Human E67 Skeletal Tissue	28
					H28670_HM2	7.5	Kapa mRNA Hyper prep (25 ng)	IDT_8nt_UDI_TruSeq_i7_127	TGGATCAC	IDT_8nt_UDI_TruSeq_i5_127	GCATTGGT	MiSeq Nano	Paired End	150	1	5165	30777118	95.48	RNA-seq on Human E67 Skeletal Tissue	29
												NovaSeq S4	Paired End	100	4	3660826		92.75	RNA-seq on Human E67 Skeletal Tissue	29
												NovaSeq S4	Paired End	100	2	3260002		93.14	RNA-seq on Human E67 Skeletal Tissue	29
												NovaSeq S4	Paired End	100	3	3351733		93.01	RNA-seq on Human E67 Skeletal Tissue	29
												NovaSeq S4	Paired End	100	4	2229995		92.65	RNA-seq on Human E67 Skeletal Tissue	29
												NovaSeq S4	Paired End	100	2	7759005		92.65	RNA-seq on Human E67 Skeletal Tissue	29
												NovaSeq S4	Paired End	100	1	10510392		93.49	RNA-seq on Human E67 Skeletal Tissue	29
																				29
					H28670_HM3	7.3	Kapa mRNA Hyper prep (25 ng)	IDT_8nt_UDI_TruSeq_i7_139	TCAAGGAC	IDT_8nt_UDI_TruSeq_i5_139	CATTCGTC	MiSeq Nano	Paired End	150	1	4883	26854981	96.28	RNA-seq on Human E67 Skeletal Tissue	30
												NovaSeq S4	Paired End	100	4	3149338		92.95	RNA-seq on Human E67 Skeletal Tissue	30
												NovaSeq S4	Paired End	100	2	2616631		93.31	RNA-seq on Human E67 Skeletal Tissue	30
												NovaSeq S4	Paired End	100	3	2924197		93.17	RNA-seq on Human E67 Skeletal Tissue	30
												NovaSeq S4	Paired End	100	4	1781011		92.79	RNA-seq on Human E67 Skeletal Tissue	30
												NovaSeq S4	Paired End	100	2	7009466		92.63	RNA-seq on Human E67 Skeletal Tissue	30
												NovaSeq S4	Paired End	100	1	9369455		93.77	RNA-seq on Human E67 Skeletal Tissue	30
					H28670_HM4	7.9	Kapa mRNA Hyper prep (25 ng)	IDT_8nt_UDI_TruSeq_i7_151	TTCGCAGT	IDT_8nt_UDI_TruSeq_i5_151	TCCGATCA	MiSeq Nano	Paired End	150	1	5911	35628017	94.67	RNA-seq on Human E67 Skeletal Tissue	31
												NovaSeq S4	Paired End	100	4	4174783		91.96	RNA-seq on Human E67 Skeletal Tissue	31
												NovaSeq S4	Paired End	100	2	4084809		92.32	RNA-seq on Human E67 Skeletal Tissue	31
												NovaSeq S4	Paired End	100	3	3997459		92.13	RNA-seq on Human E67 Skeletal Tissue	31
												NovaSeq S4	Paired End	100	4	3055074		91.71	RNA-seq on Human E67 Skeletal Tissue	31
												NovaSeq S4	Paired End	100	2	8734843		91.93	RNA-seq on Human E67 Skeletal Tissue	31
												NovaSeq S4	Paired End	100	1	11575138		92.86	RNA-seq on Human E67 Skeletal Tissue	31
					H28670_HM5	7.2	Kapa mRNA Hyper prep (25 ng)	IDT_8nt_UDI_TruSeq_i7_163	AGTCGCTT	IDT_8nt_UDI_TruSeq_i5_163	TCGAACCT	MiSeq Nano	Paired End	150	1	5207	15164875	94	RNA-seq on Human E67 Skeletal Tissue	32
												NovaSeq S4	Paired End	100	4	468421		88.56	RNA-seq on Human E67 Skeletal Tissue	32
												NovaSeq S4	Paired End	100	2	814720		89.74	RNA-seq on Human E67 Skeletal Tissue	32
												NovaSeq S4	Paired End	100	3	712792		89.51	RNA-seq on Human E67 Skeletal Tissue	32
												NovaSeq S4	Paired End	100	4	633803		89.41	RNA-seq on Human E67 Skeletal Tissue	32
												NovaSeq S4	Paired End	100	2	1438991		89.52	RNA-seq on Human E67 Skeletal Tissue	32
												NovaSeq S4	Paired End	100	1	11090941		92.54	RNA-seq on Human E67 Skeletal Tissue	32
					H28670_FP1	7.1	Kapa mRNA Hyper prep (25 ng)	IDT_8nt_UDI_TruSeq_i7_175	CGTATTCG	IDT_8nt_UDI_TruSeq_i5_175	TGTCGACT	MiSeq Nano	Paired End	150	1	5394	27150050	93.57	RNA-seq on Human E67 Skeletal Tissue	33
												NovaSeq S4	Paired End	100	4	3184212		91.85	RNA-seq on Human E67 Skeletal Tissue	33
												NovaSeq S4	Paired End	100	2	2885284		92.08	RNA-seq on Human E67 Skeletal Tissue	33
												NovaSeq S4	Paired End	100	3	3149579		91.98	RNA-seq on Human E67 Skeletal Tissue	33
												NovaSeq S4	Paired End	100	4	2457584		91.52	RNA-seq on Human E67 Skeletal Tissue	33
												NovaSeq S4	Paired End	100	2	6620085		91.82	RNA-seq on Human E67 Skeletal Tissue	33
												NovaSeq S4	Paired End	100	1	8847912		92.66	RNA-seq on Human E67 Skeletal Tissue	33
					H28670_FP2	7.6	Kapa mRNA Hyper prep (25 ng)	IDT_8nt_UDI_TruSeq_i7_187	GTTAAGGC	IDT_8nt_UDI_TruSeq_i5_187	ACCTTCGA	MiSeq Nano	Paired End	150	1	5211	28775503	93.99	RNA-seq on Human E67 Skeletal Tissue	34
												NovaSeq S4	Paired End	100	4	3425147		92.39	RNA-seq on Human E67 Skeletal Tissue	34
												NovaSeq S4	Paired End	100	2	3275045		92.79	RNA-seq on Human E67 Skeletal Tissue	34
												NovaSeq S4	Paired End	100	3	3219352		92.63	RNA-seq on Human E67 Skeletal Tissue	34
												NovaSeq S4	Paired End	100	4	2372945		92.25	RNA-seq on Human E67 Skeletal Tissue	34
												NovaSeq S4	Paired End	100	2	6989199		92.28	RNA-seq on Human E67 Skeletal Tissue	34
												NovaSeq S4	Paired End	100	1	9488604		93.44	RNA-seq on Human E67 Skeletal Tissue	34
					H28670_FP3	8.2	Kapa mRNA Hyper prep (25 ng)	IDT_8nt_UDI_TruSeq_i7_104	TCACAGCA	IDT_8nt_UDI_TruSeq_i5_104	GAGGCATT	MiSeq Nano	Paired End	150	1	5034	26728142	93.58	RNA-seq on Human E67 Skeletal Tissue	35
												NovaSeq S4	Paired End	100	4	3173315		91.21	RNA-seq on Human E67 Skeletal Tissue	35
												NovaSeq S4	Paired End	100	2	2198889		91.61	RNA-seq on Human E67 Skeletal Tissue	35
												NovaSeq S4	Paired End	100	3	2670510		91.49	RNA-seq on Human E67 Skeletal Tissue	35
												NovaSeq S4	Paired End	100	4	1568416		91.02	RNA-seq on Human E67 Skeletal Tissue	35
												NovaSeq S4	Paired End	100	2	7016916		91.27	RNA-seq on Human E67 Skeletal Tissue	35
												NovaSeq S4	Paired End	100	1	10095062		92.11	RNA-seq on Human E67 Skeletal Tissue	35
					H28670_FP4	9	Kapa mRNA Hyper prep (25 ng)	IDT_8nt_UDI_TruSeq_i7_116	CTCCTAGA	IDT_8nt_UDI_TruSeq_i5_116	GCTTCACA	MiSeq Nano	Paired End	150	1	3492	18004906	95.89	RNA-seq on Human E67 Skeletal Tissue	36
												NovaSeq S4	Paired End	100	4	2142590		92.15	RNA-seq on Human E67 Skeletal Tissue	36
												NovaSeq S4	Paired End	100	2	1940561		92.66	RNA-seq on Human E67 Skeletal Tissue	36
												NovaSeq S4	Paired End	100	3	2016873		92.52	RNA-seq on Human E67 Skeletal Tissue	36
												NovaSeq S4	Paired End	100	4	1353162		92.1	RNA-seq on Human E67 Skeletal Tissue	36
												NovaSeq S4	Paired End	100	2	4562787		92.09	RNA-seq on Human E67 Skeletal Tissue	36
												NovaSeq S4	Paired End	100	1	5985441		93.35	RNA-seq on Human E67 Skeletal Tissue	36
					H28670_FP5	8.9	Kapa mRNA Hyper prep (25 ng)	IDT_8nt_UDI_TruSeq_i7_128	ACACCAGT	IDT_8nt_UDI_TruSeq_i5_128	AGTGCATC	MiSeq Nano	Paired End	150	1	6262	38764093	93.81	RNA-seq on Human E67 Skeletal Tissue	37
												NovaSeq S4	Paired End	100	4	4410385		91.49	RNA-seq on Human E67 Skeletal Tissue	37
												NovaSeq S4	Paired End	100	2	4363518		91.99	RNA-seq on Human E67 Skeletal Tissue	37
												NovaSeq S4	Paired End	100	3	4717222		91.77	RNA-seq on Human E67 Skeletal Tissue	37
												NovaSeq S4	Paired End	100	4	4080174		91.41	RNA-seq on Human E67 Skeletal Tissue	37
												NovaSeq S4	Paired End	100	2	9049026		91.72	RNA-seq on Human E67 Skeletal Tissue	37
												NovaSeq S4	Paired End	100	1	12137506		92.48	RNA-seq on Human E67 Skeletal Tissue	37
					H28670_FM1	8	Kapa mRNA Hyper prep (25 ng)	IDT_8nt_UDI_TruSeq_i7_140	TGAACCTG	IDT_8nt_UDI_TruSeq_i5_140	ACCTCTTC	MiSeq Nano	Paired End	150	1	4759	29762789	95.12	RNA-seq on Human E67 Skeletal Tissue	38
												NovaSeq S4	Paired End	100	4	3458375		92.37	RNA-seq on Human E67 Skeletal Tissue	38
												NovaSeq S4	Paired End	100	2	3387485		92.71	RNA-seq on Human E67 Skeletal Tissue	38
												NovaSeq S4	Paired End	100	3	3344052		92.54	RNA-seq on Human E67 Skeletal Tissue	38
												NovaSeq S4	Paired End	100	4	2577133		92.16	RNA-seq on Human E67 Skeletal Tissue	38
												NovaSeq S4	Paired End	100	2	7268407		92.3	RNA-seq on Human E67 Skeletal Tissue	38
												NovaSeq S4	Paired End	100	1	9722578		93.1	RNA-seq on Human E67 Skeletal Tissue	38
					H28670_FM2	7.7	Kapa mRNA Hyper prep (25 ng)	IDT_8nt_UDI_TruSeq_i7_152	ACGACAGA	IDT_8nt_UDI_TruSeq_i5_152	CGCAACTA	MiSeq Nano	Paired End	150	1	5217	27455429	95.53	RNA-seq on Human E67 Skeletal Tissue	39
												NovaSeq S4	Paired End	100	4	3194296		92.52	RNA-seq on Human E67 Skeletal Tissue	39
												NovaSeq S4	Paired End	100	2	2787859		92.9	RNA-seq on Human E67 Skeletal Tissue	39
												NovaSeq S4	Paired End	100	3	2962320		92.78	RNA-seq on Human E67 Skeletal Tissue	39
												NovaSeq S4	Paired End	100	4	2021855		92.29	RNA-seq on Human E67 Skeletal Tissue	39
												NovaSeq S4	Paired End	100	2	7020755		92.37	RNA-seq on Human E67 Skeletal Tissue	39
												NovaSeq S4	Paired End	100	1	9463127		93.39	RNA-seq on Human E67 Skeletal Tissue	39
					H28670_FM3	7.7	Kapa mRNA Hyper prep (25 ng)	IDT_8nt_UDI_TruSeq_i7_164	TAGGTAGG	IDT_8nt_UDI_TruSeq_i5_164	CACAGACT	MiSeq Nano	Paired End	150	1	5488	31105331	94.32	RNA-seq on Human E67 Skeletal Tissue	40
												NovaSeq S4	Paired End	100	4	3618145		91.94	RNA-seq on Human E67 Skeletal Tissue	40
												NovaSeq S4	Paired End	100	2	2993884		92.36	RNA-seq on Human E67 Skeletal Tissue	40
												NovaSeq S4	Paired End	100	3	3346618		92.16	RNA-seq on Human E67 Skeletal Tissue	40
												NovaSeq S4	Paired End	100	4	1941774		91.77	RNA-seq on Human E67 Skeletal Tissue	40
												NovaSeq S4	Paired End	100	2	8032658		91.92	RNA-seq on Human E67 Skeletal Tissue	40
												NovaSeq S4	Paired End	100	1	11166764		92.69	RNA-seq on Human E67 Skeletal Tissue	40
					H28670_FM4	7.8	Kapa mRNA Hyper prep (25 ng)	IDT_8nt_UDI_TruSeq_i7_176	AGCAAGCA	IDT_8nt_UDI_TruSeq_i5_176	AAGGAGAC	MiSeq Nano	Paired End	150	1	5346	29115307	95.72	RNA-seq on Human E67 Skeletal Tissue	41
												NovaSeq S4	Paired End	100	4	3447801		92.42	RNA-seq on Human E67 Skeletal Tissue	41
												NovaSeq S4	Paired End	100	2	2901108		92.99	RNA-seq on Human E67 Skeletal Tissue	41
												NovaSeq S4	Paired End	100	3	3227348		92.83	RNA-seq on Human E67 Skeletal Tissue	41
												NovaSeq S4	Paired End	100	4	1956128		92.53	RNA-seq on Human E67 Skeletal Tissue	41
												NovaSeq S4	Paired End	100	2	7550681		92.47	RNA-seq on Human E67 Skeletal Tissue	41
												NovaSeq S4	Paired End	100	1	10026895		93.4	RNA-seq on Human E67 Skeletal Tissue	41
					H28670_FM5	6.8	Kapa mRNA Hyper prep (25 ng)	IDT_8nt_UDI_TruSeq_i7_188	ATGCCAAC	IDT_8nt_UDI_TruSeq_i5_188	TTACCGAC	MiSeq Nano	Paired End	150	1	5225	27659567	95.58	RNA-seq on Human E67 Skeletal Tissue	42
												NovaSeq S4	Paired End	100	4	3263505		92.32	RNA-seq on Human E67 Skeletal Tissue	42
												NovaSeq S4	Paired End	100	2	2852193		92.89	RNA-seq on Human E67 Skeletal Tissue	42
												NovaSeq S4	Paired End	100	3	3172536		92.68	RNA-seq on Human E67 Skeletal Tissue	42
												NovaSeq S4	Paired End	100	4	2413637		92.34	RNA-seq on Human E67 Skeletal Tissue	42
												NovaSeq S4	Paired End	100	2	6844088		92.39	RNA-seq on Human E67 Skeletal Tissue	42
												NovaSeq S4	Paired End	100	1	9108383		93.36	RNA-seq on Human E67 Skeletal Tissue	42
																				43
Late 3	E72	H28662	Male	2020-12-03	H28662_HP1	8.1	Kapa mRNA Hyper prep (25 ng)	IDT_8nt_UDI_TruSeq_i7_105	CTACTTGG	IDT_8nt_UDI_TruSeq_i5_105	TACTCCAG	MiSeq Nano	Paired End	150	1	4213	26524087	94.63	RNA-seq on Human E72 Skeletal Tissue	44
												NovaSeq S4	Paired End	100	4	3112158		91.75	RNA-seq on Human E72 Skeletal Tissue	44
												NovaSeq S4	Paired End	100	2	2650577		92.11	RNA-seq on Human E72 Skeletal Tissue	44
												NovaSeq S4	Paired End	100	3	2920295		91.93	RNA-seq on Human E72 Skeletal Tissue	44
												NovaSeq S4	Paired End	100	4	1797087		91.54	RNA-seq on Human E72 Skeletal Tissue	44
												NovaSeq S4	Paired End	100	2	6908157		91.67	RNA-seq on Human E72 Skeletal Tissue	44
												NovaSeq S4	Paired End	100	1	9131600		92.61	RNA-seq on Human E72 Skeletal Tissue	44
					H28662_HP2	7.2	Kapa mRNA Hyper prep (25 ng)	IDT_8nt_UDI_TruSeq_i7_117	CAACGGAT	IDT_8nt_UDI_TruSeq_i5_117	GCCACTTA	MiSeq Nano	Paired End	150	1	5160	31745812	95.81	RNA-seq on Human E72 Skeletal Tissue	45
												NovaSeq S4	Paired End	100	4	3742797		92.84	RNA-seq on Human E72 Skeletal Tissue	45
												NovaSeq S4	Paired End	100	2	3135621		93.21	RNA-seq on Human E72 Skeletal Tissue	45
												NovaSeq S4	Paired End	100	3	3383502		93.1	RNA-seq on Human E72 Skeletal Tissue	45
												NovaSeq S4	Paired End	100	4	2250804		92.77	RNA-seq on Human E72 Skeletal Tissue	45
												NovaSeq S4	Paired End	100	2	8211762		92.59	RNA-seq on Human E72 Skeletal Tissue	45
												NovaSeq S4	Paired End	100	1	11016166		93.57	RNA-seq on Human E72 Skeletal Tissue	45
					H28662_HP3	7.7	Kapa mRNA Hyper prep (25 ng)	IDT_8nt_UDI_TruSeq_i7_129	CAGGTTAG	IDT_8nt_UDI_TruSeq_i5_129	AATCCAGC	MiSeq Nano	Paired End	150	1	5269	29756262	94.79	RNA-seq on Human E72 Skeletal Tissue	46
												NovaSeq S4	Paired End	100	4	3475181		92.15	RNA-seq on Human E72 Skeletal Tissue	46
												NovaSeq S4	Paired End	100	2	2923567		92.53	RNA-seq on Human E72 Skeletal Tissue	46
												NovaSeq S4	Paired End	100	3	3238194		92.39	RNA-seq on Human E72 Skeletal Tissue	46
												NovaSeq S4	Paired End	100	4	2015407		92.01	RNA-seq on Human E72 Skeletal Tissue	46
												NovaSeq S4	Paired End	100	2	7650822		92.17	RNA-seq on Human E72 Skeletal Tissue	46
												NovaSeq S4	Paired End	100	1	10447822		92.92	RNA-seq on Human E72 Skeletal Tissue	46
					H28662_HP4	7.8	Kapa mRNA Hyper prep (25 ng)	IDT_8nt_UDI_TruSeq_i7_141	AGTGTTGG	IDT_8nt_UDI_TruSeq_i5_141	CATTGACG	MiSeq Nano	Paired End	150	1	4443	25733155	96.39	RNA-seq on Human E72 Skeletal Tissue	47
												NovaSeq S4	Paired End	100	4	3033807		92.92	RNA-seq on Human E72 Skeletal Tissue	47
												NovaSeq S4	Paired End	100	2	2547771		93.32	RNA-seq on Human E72 Skeletal Tissue	47
												NovaSeq S4	Paired End	100	3	2830156		93.14	RNA-seq on Human E72 Skeletal Tissue	47
												NovaSeq S4	Paired End	100	4	1733605		92.83	RNA-seq on Human E72 Skeletal Tissue	47
												NovaSeq S4	Paired End	100	2	6595847		92.8	RNA-seq on Human E72 Skeletal Tissue	47
												NovaSeq S4	Paired End	100	1	8987526		93.63	RNA-seq on Human E72 Skeletal Tissue	47
					H28662_HP5	7.9	Kapa mRNA Hyper prep (25 ng)	IDT_8nt_UDI_TruSeq_i7_153	AGCTTGAG	IDT_8nt_UDI_TruSeq_i5_153	GATCAGAC	MiSeq Nano	Paired End	150	1	4876	23265625	95.53	RNA-seq on Human E72 Skeletal Tissue	48
												NovaSeq S4	Paired End	100	4	2677097		92.6	RNA-seq on Human E72 Skeletal Tissue	48
												NovaSeq S4	Paired End	100	2	2148233		93.16	RNA-seq on Human E72 Skeletal Tissue	48
												NovaSeq S4	Paired End	100	3	2448999		93.01	RNA-seq on Human E72 Skeletal Tissue	48
												NovaSeq S4	Paired End	100	4	1555633		92.73	RNA-seq on Human E72 Skeletal Tissue	48
												NovaSeq S4	Paired End	100	2	5340336		92.67	RNA-seq on Human E72 Skeletal Tissue	48
												NovaSeq S4	Paired End	100	1	9090451		93.22	RNA-seq on Human E72 Skeletal Tissue	48
					H28662_HM1	7.7	Kapa mRNA Hyper prep (25 ng)	IDT_8nt_UDI_TruSeq_i7_165	CAGGAGAT	IDT_8nt_UDI_TruSeq_i5_165	CCTTAGGT	MiSeq Nano	Paired End	150	1	5514	30469773	94.36	RNA-seq on Human E72 Skeletal Tissue	49
												NovaSeq S4	Paired End	100	4	3455523		92.52	RNA-seq on Human E72 Skeletal Tissue	49
												NovaSeq S4	Paired End	100	2	3176267		92.89	RNA-seq on Human E72 Skeletal Tissue	49
												NovaSeq S4	Paired End	100	3	3425141		92.74	RNA-seq on Human E72 Skeletal Tissue	49
												NovaSeq S4	Paired End	100	4	2159775		92.53	RNA-seq on Human E72 Skeletal Tissue	49
												NovaSeq S4	Paired End	100	2	6598288		92.66	RNA-seq on Human E72 Skeletal Tissue	49
												NovaSeq S4	Paired End	100	1	11649265		93.14	RNA-seq on Human E72 Skeletal Tissue	49
					H28662_HM2	8.4	Kapa mRNA Hyper prep (25 ng)	IDT_8nt_UDI_TruSeq_i7_177	TGTTCGAG	IDT_8nt_UDI_TruSeq_i5_177	CGTATCTC	MiSeq Nano	Paired End	150	1	4983	29159272	95.42	RNA-seq on Human E72 Skeletal Tissue	50
												NovaSeq S4	Paired End	100	4	3453809		92.68	RNA-seq on Human E72 Skeletal Tissue	50
												NovaSeq S4	Paired End	100	2	2956082		93.13	RNA-seq on Human E72 Skeletal Tissue	50
												NovaSeq S4	Paired End	100	3	3222158		92.93	RNA-seq on Human E72 Skeletal Tissue	50
												NovaSeq S4	Paired End	100	4	2192091		92.57	RNA-seq on Human E72 Skeletal Tissue	50
												NovaSeq S4	Paired End	100	2	7230975		92.67	RNA-seq on Human E72 Skeletal Tissue	50
												NovaSeq S4	Paired End	100	1	10099174		93.27	RNA-seq on Human E72 Skeletal Tissue	50
					H28662_HM3	7	Kapa mRNA Hyper prep (25 ng)	IDT_8nt_UDI_TruSeq_i7_189	AGAGGTTG	IDT_8nt_UDI_TruSeq_i5_189	GTCATCGT	MiSeq Nano	Paired End	150	1	4891	27971151	94.87	RNA-seq on Human E72 Skeletal Tissue	51
												NovaSeq S4	Paired End	100	4	3340393		92.36	RNA-seq on Human E72 Skeletal Tissue	51
												NovaSeq S4	Paired End	100	2	2857964		92.83	RNA-seq on Human E72 Skeletal Tissue	51
												NovaSeq S4	Paired End	100	3	3066450		92.67	RNA-seq on Human E72 Skeletal Tissue	51
												NovaSeq S4	Paired End	100	4	2092399		92.3	RNA-seq on Human E72 Skeletal Tissue	51
												NovaSeq S4	Paired End	100	2	6871394		92.41	RNA-seq on Human E72 Skeletal Tissue	51
												NovaSeq S4	Paired End	100	1	9737660		93.06	RNA-seq on Human E72 Skeletal Tissue	51
					H28662_HM4	7	Kapa mRNA Hyper prep (25 ng)	IDT_8nt_UDI_TruSeq_i7_106	CCTCAGTT	IDT_8nt_UDI_TruSeq_i5_106	CAGCATAC	MiSeq Nano	Paired End	150	1	5098	29919717	94.14	RNA-seq on Human E72 Skeletal Tissue	52
												NovaSeq S4	Paired End	100	4	3503582		91.58	RNA-seq on Human E72 Skeletal Tissue	52
												NovaSeq S4	Paired End	100	2	2960966		91.96	RNA-seq on Human E72 Skeletal Tissue	52
												NovaSeq S4	Paired End	100	3	3287850		91.85	RNA-seq on Human E72 Skeletal Tissue	52
												NovaSeq S4	Paired End	100	4	2040785		91.39	RNA-seq on Human E72 Skeletal Tissue	52
												NovaSeq S4	Paired End	100	2	7825036		91.51	RNA-seq on Human E72 Skeletal Tissue	52
												NovaSeq S4	Paired End	100	1	10296400		92.61	RNA-seq on Human E72 Skeletal Tissue	52
					H28662_HM5	7.1	Kapa mRNA Hyper prep (25 ng)	IDT_8nt_UDI_TruSeq_i7_118	TGGCTATC	IDT_8nt_UDI_TruSeq_i5_118	CATCACGT	MiSeq Nano	Paired End	150	1	5740	28000093	95.52	RNA-seq on Human E72 Skeletal Tissue	53
												NovaSeq S4	Paired End	100	4	3226369		92.68	RNA-seq on Human E72 Skeletal Tissue	53
												NovaSeq S4	Paired End	100	2	2628758		92.92	RNA-seq on Human E72 Skeletal Tissue	53
												NovaSeq S4	Paired End	100	3	2945893		92.83	RNA-seq on Human E72 Skeletal Tissue	53
												NovaSeq S4	Paired End	100	4	1776680		92.35	RNA-seq on Human E72 Skeletal Tissue	53
												NovaSeq S4	Paired End	100	2	7436528		92.48	RNA-seq on Human E72 Skeletal Tissue	53
												NovaSeq S4	Paired End	100	1	9980125		93.46	RNA-seq on Human E72 Skeletal Tissue	53
					H28662_FP1	7.7	Kapa mRNA Hyper prep (25 ng)	IDT_8nt_UDI_TruSeq_i7_130	AGTTGGCT	IDT_8nt_UDI_TruSeq_i5_130	GCAACCAT	MiSeq Nano	Paired End	150	1	4889	30869790	96.03	RNA-seq on Human E72 Skeletal Tissue	54
												NovaSeq S4	Paired End	100	4	3608311		92	RNA-seq on Human E72 Skeletal Tissue	54
												NovaSeq S4	Paired End	100	2	2946209		92.45	RNA-seq on Human E72 Skeletal Tissue	54
												NovaSeq S4	Paired End	100	3	3179649		92.24	RNA-seq on Human E72 Skeletal Tissue	54
												NovaSeq S4	Paired End	100	4	2045414		91.83	RNA-seq on Human E72 Skeletal Tissue	54
												NovaSeq S4	Paired End	100	2	8058100		91.84	RNA-seq on Human E72 Skeletal Tissue	54
												NovaSeq S4	Paired End	100	1	11027218		93.04	RNA-seq on Human E72 Skeletal Tissue	54
					H28662_FP2	7.9	Kapa mRNA Hyper prep (25 ng)	IDT_8nt_UDI_TruSeq_i7_142	GTACTCTC	IDT_8nt_UDI_TruSeq_i5_142	TCCTGGTA	MiSeq Nano	Paired End	150	1	5192	27242693	97.1	RNA-seq on Human E72 Skeletal Tissue	55
												NovaSeq S4	Paired End	100	4	3238882		93.47	RNA-seq on Human E72 Skeletal Tissue	55
												NovaSeq S4	Paired End	100	2	3015306		93.88	RNA-seq on Human E72 Skeletal Tissue	55
												NovaSeq S4	Paired End	100	3	3000204		93.79	RNA-seq on Human E72 Skeletal Tissue	55
												NovaSeq S4	Paired End	100	4	2141395		93.44	RNA-seq on Human E72 Skeletal Tissue	55
												NovaSeq S4	Paired End	100	2	6731259		93.44	RNA-seq on Human E72 Skeletal Tissue	55
												NovaSeq S4	Paired End	100	1	9110455		94.18	RNA-seq on Human E72 Skeletal Tissue	55
					H28662_FP3	7.5	Kapa mRNA Hyper prep (25 ng)	IDT_8nt_UDI_TruSeq_i7_154	GAGTGGTT	IDT_8nt_UDI_TruSeq_i5_154	GCATAACG	MiSeq Nano	Paired End	150	1	5269	33331224	96.28	RNA-seq on Human E72 Skeletal Tissue	56
												NovaSeq S4	Paired End	100	4	3911269		92.35	RNA-seq on Human E72 Skeletal Tissue	56
												NovaSeq S4	Paired End	100	2	3792094		92.7	RNA-seq on Human E72 Skeletal Tissue	56
												NovaSeq S4	Paired End	100	3	3820097		92.56	RNA-seq on Human E72 Skeletal Tissue	56
												NovaSeq S4	Paired End	100	4	2924833		92.19	RNA-seq on Human E72 Skeletal Tissue	56
												NovaSeq S4	Paired End	100	2	8163396		92.29	RNA-seq on Human E72 Skeletal Tissue	56
												NovaSeq S4	Paired End	100	1	10714266		93.43	RNA-seq on Human E72 Skeletal Tissue	56
					H28662_FP4	7.9	Kapa mRNA Hyper prep (25 ng)	IDT_8nt_UDI_TruSeq_i7_166	CATCGTGA	IDT_8nt_UDI_TruSeq_i5_166	TACCTGCA	MiSeq Nano	Paired End	150	1	5523	29353872	94.34	RNA-seq on Human E72 Skeletal Tissue	57
												NovaSeq S4	Paired End	100	4	3334338		91.8	RNA-seq on Human E72 Skeletal Tissue	57
												NovaSeq S4	Paired End	100	2	2720122		92.12	RNA-seq on Human E72 Skeletal Tissue	57
												NovaSeq S4	Paired End	100	3	3033315		92	RNA-seq on Human E72 Skeletal Tissue	57
												NovaSeq S4	Paired End	100	4	1806168		91.55	RNA-seq on Human E72 Skeletal Tissue	57
												NovaSeq S4	Paired End	100	2	7884818		91.73	RNA-seq on Human E72 Skeletal Tissue	57
												NovaSeq S4	Paired End	100	1	10569588		92.7	RNA-seq on Human E72 Skeletal Tissue	57
					H28662_FP5	6.8	Kapa mRNA Hyper prep (25 ng)	IDT_8nt_UDI_TruSeq_i7_178	CTCCATGT	IDT_8nt_UDI_TruSeq_i5_178	ACACCGAT	MiSeq Nano	Paired End	150	1	5071	31840533	94.6	RNA-seq on Human E72 Skeletal Tissue	58
												NovaSeq S4	Paired End	100	4	3727048		91.85	RNA-seq on Human E72 Skeletal Tissue	58
												NovaSeq S4	Paired End	100	2	3335327		92.21	RNA-seq on Human E72 Skeletal Tissue	58
												NovaSeq S4	Paired End	100	3	3605683		92.03	RNA-seq on Human E72 Skeletal Tissue	58
												NovaSeq S4	Paired End	100	4	2766057		91.61	RNA-seq on Human E72 Skeletal Tissue	58
												NovaSeq S4	Paired End	100	2	7956253		91.85	RNA-seq on Human E72 Skeletal Tissue	58
												NovaSeq S4	Paired End	100	1	10445094		92.88	RNA-seq on Human E72 Skeletal Tissue	58
					H28662_FM1	8	Kapa mRNA Hyper prep (25 ng)	IDT_8nt_UDI_TruSeq_i7_190	ACCATCCA	IDT_8nt_UDI_TruSeq_i5_190	CATACGGA	MiSeq Nano	Paired End	150	1	5581	26312747	95.92	RNA-seq on Human E72 Skeletal Tissue	59
												NovaSeq S4	Paired End	100	4	3072060		93.03	RNA-seq on Human E72 Skeletal Tissue	59
												NovaSeq S4	Paired End	100	2	2556862		93.32	RNA-seq on Human E72 Skeletal Tissue	59
												NovaSeq S4	Paired End	100	3	2839851		93.22	RNA-seq on Human E72 Skeletal Tissue	59
												NovaSeq S4	Paired End	100	4	1659950		92.81	RNA-seq on Human E72 Skeletal Tissue	59
												NovaSeq S4	Paired End	100	2	6940560		92.75	RNA-seq on Human E72 Skeletal Tissue	59
												NovaSeq S4	Paired End	100	1	9237883		93.82	RNA-seq on Human E72 Skeletal Tissue	59
					H28662_FM2	8.5	Kapa mRNA Hyper prep (25 ng)	IDT_8nt_UDI_TruSeq_i7_107	TCCTACCT	IDT_8nt_UDI_TruSeq_i5_107	ACTCTCCA	MiSeq Nano	Paired End	150	1	4726	29644312	96.08	RNA-seq on Human E72 Skeletal Tissue	60
												NovaSeq S4	Paired End	100	4	3474108		92.06	RNA-seq on Human E72 Skeletal Tissue	60
												NovaSeq S4	Paired End	100	2	3049539		92.56	RNA-seq on Human E72 Skeletal Tissue	60
												NovaSeq S4	Paired End	100	3	3281237		92.34	RNA-seq on Human E72 Skeletal Tissue	60
												NovaSeq S4	Paired End	100	4	2330095		91.95	RNA-seq on Human E72 Skeletal Tissue	60
												NovaSeq S4	Paired End	100	2	7573593		92.02	RNA-seq on Human E72 Skeletal Tissue	60
												NovaSeq S4	Paired End	100	1	9931014		93.08	RNA-seq on Human E72 Skeletal Tissue	60
					H28662_FM3	7.6	Kapa mRNA Hyper prep (25 ng)	IDT_8nt_UDI_TruSeq_i7_119	CGGTCATA	IDT_8nt_UDI_TruSeq_i5_119	TGCTCTAC	MiSeq Nano	Paired End	150	1	4443	28252147	94.91	RNA-seq on Human E72 Skeletal Tissue	61
												NovaSeq S4	Paired End	100	4	3165310		91.55	RNA-seq on Human E72 Skeletal Tissue	61
												NovaSeq S4	Paired End	100	2	3175863		92.1	RNA-seq on Human E72 Skeletal Tissue	61
												NovaSeq S4	Paired End	100	3	3419423		91.78	RNA-seq on Human E72 Skeletal Tissue	61
												NovaSeq S4	Paired End	100	4	2921909		91.44	RNA-seq on Human E72 Skeletal Tissue	61
												NovaSeq S4	Paired End	100	2	6740799		91.53	RNA-seq on Human E72 Skeletal Tissue	61
												NovaSeq S4	Paired End	100	1	8824400		92.76	RNA-seq on Human E72 Skeletal Tissue	61
					H28662_FM4	7.5	Kapa mRNA Hyper prep (25 ng)	IDT_8nt_UDI_TruSeq_i7_131	TCAACTGG	IDT_8nt_UDI_TruSeq_i5_131	CGATTCTG	MiSeq Nano	Paired End	150	1	5056	28943166	94.57	RNA-seq on Human E72 Skeletal Tissue	62
												NovaSeq S4	Paired End	100	4	3184660		91.63	RNA-seq on Human E72 Skeletal Tissue	62
												NovaSeq S4	Paired End	100	2	3229583		92.21	RNA-seq on Human E72 Skeletal Tissue	62
												NovaSeq S4	Paired End	100	3	3497834		92	RNA-seq on Human E72 Skeletal Tissue	62
												NovaSeq S4	Paired End	100	4	2968429		91.66	RNA-seq on Human E72 Skeletal Tissue	62
												NovaSeq S4	Paired End	100	2	6842355		91.99	RNA-seq on Human E72 Skeletal Tissue	62
												NovaSeq S4	Paired End	100	1	9215249		92.34	RNA-seq on Human E72 Skeletal Tissue	62
					H28662_FM5	8.3	Kapa mRNA Hyper prep (25 ng)	IDT_8nt_UDI_TruSeq_i7_143	CCGTATCT	IDT_8nt_UDI_TruSeq_i5_143	TTCGTACG	MiSeq Nano	Paired End	150	1	4778	26128276	95.49	RNA-seq on Human E72 Skeletal Tissue	63
												NovaSeq S4	Paired End	100	4	2939178		91.75	RNA-seq on Human E72 Skeletal Tissue	63
												NovaSeq S4	Paired End	100	2	2682916		92.44	RNA-seq on Human E72 Skeletal Tissue	63
												NovaSeq S4	Paired End	100	3	3166987		92.15	RNA-seq on Human E72 Skeletal Tissue	63
												NovaSeq S4	Paired End	100	4	2608312		91.83	RNA-seq on Human E72 Skeletal Tissue	63
												NovaSeq S4	Paired End	100	2	6282870		91.99	RNA-seq on Human E72 Skeletal Tissue	63
												NovaSeq S4	Paired End	100	1	8443235		92.72	RNA-seq on Human E72 Skeletal Tissue	63
																				64
Late 4	E72	H28852	Male	2021-09-16	H28852_HP1	6.8	Kapa mRNA Hyper prep (25 ng)	IDT_8nt_UDI_TruSeq_i7_155	GCTGTAAG	IDT_8nt_UDI_TruSeq_i5_155	TACAGAGC	MiSeq Nano	Paired End	150	1	4692	26885305	94.48	RNA-seq on Human E72 Skeletal Tissue	65
												NovaSeq S4	Paired End	100	4	3114308		91.84	RNA-seq on Human E72 Skeletal Tissue	65
												NovaSeq S4	Paired End	100	2	2617585		92.22	RNA-seq on Human E72 Skeletal Tissue	65
												NovaSeq S4	Paired End	100	3	2902950		92.05	RNA-seq on Human E72 Skeletal Tissue	65
												NovaSeq S4	Paired End	100	4	1684172		91.71	RNA-seq on Human E72 Skeletal Tissue	65
												NovaSeq S4	Paired End	100	2	7107620		91.78	RNA-seq on Human E72 Skeletal Tissue	65
												NovaSeq S4	Paired End	100	1	9453978		92.65	RNA-seq on Human E72 Skeletal Tissue	65
					H28852_HP2	7.3	Kapa mRNA Hyper prep (25 ng)	IDT_8nt_UDI_TruSeq_i7_167	TGTTGTGG	IDT_8nt_UDI_TruSeq_i5_167	GTGTCCTT	MiSeq Nano	Paired End	150	1	5100	34031489	94.28	RNA-seq on Human E72 Skeletal Tissue	66
												NovaSeq S4	Paired End	100	4	4014636		92.26	RNA-seq on Human E72 Skeletal Tissue	66
												NovaSeq S4	Paired End	100	2	3532038		92.6	RNA-seq on Human E72 Skeletal Tissue	66
												NovaSeq S4	Paired End	100	3	4161171		92.32	RNA-seq on Human E72 Skeletal Tissue	66
												NovaSeq S4	Paired End	100	4	3490087		91.9	RNA-seq on Human E72 Skeletal Tissue	66
												NovaSeq S4	Paired End	100	2	7807376		92.15	RNA-seq on Human E72 Skeletal Tissue	66
												NovaSeq S4	Paired End	100	1	11021081		92.97	RNA-seq on Human E72 Skeletal Tissue	66
					H28852_HP3	6.8	Kapa mRNA Hyper prep (25 ng)	IDT_8nt_UDI_TruSeq_i7_179	CGTCTTGT	IDT_8nt_UDI_TruSeq_i5_179	TTGCGAGA	MiSeq Nano	Paired End	150	1	5786	32486705	94.99	RNA-seq on Human E72 Skeletal Tissue	67
												NovaSeq S4	Paired End	100	4	3732264		92.58	RNA-seq on Human E72 Skeletal Tissue	67
												NovaSeq S4	Paired End	100	2	3409642		92.98	RNA-seq on Human E72 Skeletal Tissue	67
												NovaSeq S4	Paired End	100	3	3877334		92.81	RNA-seq on Human E72 Skeletal Tissue	67
												NovaSeq S4	Paired End	100	4	3158426		92.46	RNA-seq on Human E72 Skeletal Tissue	67
												NovaSeq S4	Paired End	100	2	7917017		92.57	RNA-seq on Human E72 Skeletal Tissue	67
												NovaSeq S4	Paired End	100	1	10386236		93.45	RNA-seq on Human E72 Skeletal Tissue	67
					H28852_HP4	7.2	Kapa mRNA Hyper prep (25 ng)	IDT_8nt_UDI_TruSeq_i7_191	GTGGATAG	IDT_8nt_UDI_TruSeq_i5_191	TCACCTAG	MiSeq Nano	Paired End	150	1	4492	25518710	92.93	RNA-seq on Human E72 Skeletal Tissue	68
												NovaSeq S4	Paired End	100	4	2993510		91.5	RNA-seq on Human E72 Skeletal Tissue	68
												NovaSeq S4	Paired End	100	2	2646501		91.84	RNA-seq on Human E72 Skeletal Tissue	68
												NovaSeq S4	Paired End	100	3	2863852		91.63	RNA-seq on Human E72 Skeletal Tissue	68
												NovaSeq S4	Paired End	100	4	2094492		91.26	RNA-seq on Human E72 Skeletal Tissue	68
												NovaSeq S4	Paired End	100	2	6193735		91.66	RNA-seq on Human E72 Skeletal Tissue	68
												NovaSeq S4	Paired End	100	1	8722128		92.28	RNA-seq on Human E72 Skeletal Tissue	68
					H28852_HP5	7.1	Kapa mRNA Hyper prep (25 ng)	IDT_8nt_UDI_TruSeq_i7_108	ATGGCGAA	IDT_8nt_UDI_TruSeq_i5_108	CTCTATCG	MiSeq Nano	Paired End	150	1	4594	28959243	92.25	RNA-seq on Human E72 Skeletal Tissue	69
												NovaSeq S4	Paired End	100	4	3319409		90.29	RNA-seq on Human E72 Skeletal Tissue	69
												NovaSeq S4	Paired End	100	2	3055822		90.6	RNA-seq on Human E72 Skeletal Tissue	69
												NovaSeq S4	Paired End	100	3	3541607		90.4	RNA-seq on Human E72 Skeletal Tissue	69
												NovaSeq S4	Paired End	100	4	2947301		90	RNA-seq on Human E72 Skeletal Tissue	69
												NovaSeq S4	Paired End	100	2	6864723		90.53	RNA-seq on Human E72 Skeletal Tissue	69
												NovaSeq S4	Paired End	100	1	9225787		91.39	RNA-seq on Human E72 Skeletal Tissue	69
					H28852_HM1	8.1	Kapa mRNA Hyper prep (25 ng)	IDT_8nt_UDI_TruSeq_i7_120	TCCAATCG	IDT_8nt_UDI_TruSeq_i5_120	CAACTGAC	MiSeq Nano	Paired End	150	1	4823	22808797	95.05	RNA-seq on Human E72 Skeletal Tissue	70
												NovaSeq S4	Paired End	100	4	2667264		92.13	RNA-seq on Human E72 Skeletal Tissue	70
												NovaSeq S4	Paired End	100	2	2211557		92.43	RNA-seq on Human E72 Skeletal Tissue	70
												NovaSeq S4	Paired End	100	3	2489462		92.3	RNA-seq on Human E72 Skeletal Tissue	70
												NovaSeq S4	Paired End	100	4	1510356		91.96	RNA-seq on Human E72 Skeletal Tissue	70
												NovaSeq S4	Paired End	100	2	5981027		91.98	RNA-seq on Human E72 Skeletal Tissue	70
												NovaSeq S4	Paired End	100	1	7944308		92.93	RNA-seq on Human E72 Skeletal Tissue	70
					H28852_HM2	7.7	Kapa mRNA Hyper prep (25 ng)	IDT_8nt_UDI_TruSeq_i7_132	CTGCACTT	IDT_8nt_UDI_TruSeq_i5_132	AAGCGTTC	MiSeq Nano	Paired End	150	1	5116	34164677	95.83	RNA-seq on Human E72 Skeletal Tissue	71
												NovaSeq S4	Paired End	100	4	4064660		92.65	RNA-seq on Human E72 Skeletal Tissue	71
												NovaSeq S4	Paired End	100	2	3349535		93.11	RNA-seq on Human E72 Skeletal Tissue	71
												NovaSeq S4	Paired End	100	3	3742589		92.94	RNA-seq on Human E72 Skeletal Tissue	71
												NovaSeq S4	Paired End	100	4	2327538		92.57	RNA-seq on Human E72 Skeletal Tissue	71
												NovaSeq S4	Paired End	100	2	8925051		92.49	RNA-seq on Human E72 Skeletal Tissue	71
												NovaSeq S4	Paired End	100	1	11750188		93.47	RNA-seq on Human E72 Skeletal Tissue	71
					H28852_HM3	8	Kapa mRNA Hyper prep (25 ng)	IDT_8nt_UDI_TruSeq_i7_144	CGAAGAAC	IDT_8nt_UDI_TruSeq_i5_144	CCTAAGTC	MiSeq Nano	Paired End	150	1	5573	28180570	93.79	RNA-seq on Human E72 Skeletal Tissue	72
												NovaSeq S4	Paired End	100	4	3325354		92.14	RNA-seq on Human E72 Skeletal Tissue	72
												NovaSeq S4	Paired End	100	2	2843669		92.39	RNA-seq on Human E72 Skeletal Tissue	72
												NovaSeq S4	Paired End	100	3	3066783		92.29	RNA-seq on Human E72 Skeletal Tissue	72
												NovaSeq S4	Paired End	100	4	2028245		91.9	RNA-seq on Human E72 Skeletal Tissue	72
												NovaSeq S4	Paired End	100	2	7342150		92	RNA-seq on Human E72 Skeletal Tissue	72
												NovaSeq S4	Paired End	100	1	9568796		92.95	RNA-seq on Human E72 Skeletal Tissue	72
					H28852_HM4	7	Kapa mRNA Hyper prep (25 ng)	IDT_8nt_UDI_TruSeq_i7_156	CCAAGACT	IDT_8nt_UDI_TruSeq_i5_156	CTCGGTAA	MiSeq Nano	Paired End	150	1	5542	31205400	96.89	RNA-seq on Human E72 Skeletal Tissue	73
												NovaSeq S4	Paired End	100	4	3544374		92.88	RNA-seq on Human E72 Skeletal Tissue	73
												NovaSeq S4	Paired End	100	2	3203589		93.36	RNA-seq on Human E72 Skeletal Tissue	73
												NovaSeq S4	Paired End	100	3	3777635		93.13	RNA-seq on Human E72 Skeletal Tissue	73
												NovaSeq S4	Paired End	100	4	3140530		92.81	RNA-seq on Human E72 Skeletal Tissue	73
												NovaSeq S4	Paired End	100	2	7586089		92.76	RNA-seq on Human E72 Skeletal Tissue	73
												NovaSeq S4	Paired End	100	1	9947641		93.78	RNA-seq on Human E72 Skeletal Tissue	73
					H28852_HM5	7.8	Kapa mRNA Hyper prep (25 ng)	IDT_8nt_UDI_TruSeq_i7_168	ACAGACCT	IDT_8nt_UDI_TruSeq_i5_168	CTAGGTTG	MiSeq Nano	Paired End	150	1	5554	34043156	95.74	RNA-seq on Human E72 Skeletal Tissue	74
												NovaSeq S4	Paired End	100	4	3898597		92.32	RNA-seq on Human E72 Skeletal Tissue	74
												NovaSeq S4	Paired End	100	2	3426004		92.93	RNA-seq on Human E72 Skeletal Tissue	74
												NovaSeq S4	Paired End	100	3	4079753		92.66	RNA-seq on Human E72 Skeletal Tissue	74
												NovaSeq S4	Paired End	100	4	3369665		92.37	RNA-seq on Human E72 Skeletal Tissue	74
												NovaSeq S4	Paired End	100	2	8205934		92.4	RNA-seq on Human E72 Skeletal Tissue	74
												NovaSeq S4	Paired End	100	1	11057649		93.17	RNA-seq on Human E72 Skeletal Tissue	74
					H28852_FP1	5.5	Kapa mRNA Hyper prep (25 ng)	IDT_8nt_UDI_TruSeq_i7_180	ATAAGGCG	IDT_8nt_UDI_TruSeq_i5_180	GCGTTAGA	MiSeq Nano	Paired End	150	1	4797	26045924	95.93	RNA-seq on Human E72 Skeletal Tissue	75
												NovaSeq S4	Paired End	100	4	3133451		92.28	RNA-seq on Human E72 Skeletal Tissue	75
												NovaSeq S4	Paired End	100	2	2719379		92.62	RNA-seq on Human E72 Skeletal Tissue	75
												NovaSeq S4	Paired End	100	3	2796571		92.51	RNA-seq on Human E72 Skeletal Tissue	75
												NovaSeq S4	Paired End	100	4	1812801		92.09	RNA-seq on Human E72 Skeletal Tissue	75
												NovaSeq S4	Paired End	100	2	6537474		92.11	RNA-seq on Human E72 Skeletal Tissue	75
												NovaSeq S4	Paired End	100	1	9041451		93.24	RNA-seq on Human E72 Skeletal Tissue	75
					H28852_FP2	8.4	Kapa mRNA Hyper prep (25 ng)	IDT_8nt_UDI_TruSeq_i7_192	CTGAGATC	IDT_8nt_UDI_TruSeq_i5_192	AGGCAATG	MiSeq Nano	Paired End	150	1	5066	29905792	96.93	RNA-seq on Human E72 Skeletal Tissue	76
												NovaSeq S4	Paired End	100	4	3485092		93.42	RNA-seq on Human E72 Skeletal Tissue	76
												NovaSeq S4	Paired End	100	2	3146187		93.73	RNA-seq on Human E72 Skeletal Tissue	76
												NovaSeq S4	Paired End	100	3	3518414		93.63	RNA-seq on Human E72 Skeletal Tissue	76
												NovaSeq S4	Paired End	100	4	2830364		93.35	RNA-seq on Human E72 Skeletal Tissue	76
												NovaSeq S4	Paired End	100	2	7192884		93.25	RNA-seq on Human E72 Skeletal Tissue	76
												NovaSeq S4	Paired End	100	1	9727785		94.03	RNA-seq on Human E72 Skeletal Tissue	76
					H28852_FP3	7.8	Kapa mRNA Hyper prep (25 ng)	IDT_8nt_UDI_TruSeq_i7_193	CTTCGTTC	IDT_8nt_UDI_TruSeq_i5_193	GAGAAGGT	MiSeq Nano	Paired End	150	1	4286	23772538	96.06	RNA-seq on Human E72 Skeletal Tissue	77
												NovaSeq S4	Paired End	100	4	3754278		92.51	RNA-seq on Human E72 Skeletal Tissue	77
												NovaSeq S4	Paired End	100	2	2984984		92.8	RNA-seq on Human E72 Skeletal Tissue	77
												NovaSeq S4	Paired End	100	3	3353398		92.76	RNA-seq on Human E72 Skeletal Tissue	77
												NovaSeq S4	Paired End	100	4	1953821		92.42	RNA-seq on Human E72 Skeletal Tissue	77
												NovaSeq S4	Paired End	100	2	5069483		92.37	RNA-seq on Human E72 Skeletal Tissue	77
												NovaSeq S4	Paired End	100	1	6652288		93.17	RNA-seq on Human E72 Skeletal Tissue	77
					H28852_FP4	7.3	Kapa mRNA Hyper prep (25 ng)	IDT_8nt_UDI_TruSeq_i7_205	CTGCGTAT	IDT_8nt_UDI_TruSeq_i5_205	ACAGTTCG	MiSeq Nano	Paired End	150	1	4083	32867327	95.63	RNA-seq on Human E72 Skeletal Tissue	78
												NovaSeq S4	Paired End	100	4	4992832		91.85	RNA-seq on Human E72 Skeletal Tissue	78
												NovaSeq S4	Paired End	100	2	4748027		92.25	RNA-seq on Human E72 Skeletal Tissue	78
												NovaSeq S4	Paired End	100	3	4653674		92.06	RNA-seq on Human E72 Skeletal Tissue	78
												NovaSeq S4	Paired End	100	4	3441550		91.73	RNA-seq on Human E72 Skeletal Tissue	78
												NovaSeq S4	Paired End	100	2	6473033		91.8	RNA-seq on Human E72 Skeletal Tissue	78
												NovaSeq S4	Paired End	100	1	8554128		92.76	RNA-seq on Human E72 Skeletal Tissue	78
					H28852_FP5	7.8	Kapa mRNA Hyper prep (25 ng)	IDT_8nt_UDI_TruSeq_i7_217	ACAGCAAC	IDT_8nt_UDI_TruSeq_i5_217	TCCTGACT	MiSeq Nano	Paired End	150	1	4576	28086743	95.05	RNA-seq on Human E72 Skeletal Tissue	79
												NovaSeq S4	Paired End	100	4	4348451		91.54	RNA-seq on Human E72 Skeletal Tissue	79
												NovaSeq S4	Paired End	100	2	3961702		92.12	RNA-seq on Human E72 Skeletal Tissue	79
												NovaSeq S4	Paired End	100	3	3983475		91.88	RNA-seq on Human E72 Skeletal Tissue	79
												NovaSeq S4	Paired End	100	4	2799327		91.54	RNA-seq on Human E72 Skeletal Tissue	79
												NovaSeq S4	Paired End	100	2	5626631		91.55	RNA-seq on Human E72 Skeletal Tissue	79
												NovaSeq S4	Paired End	100	1	7362581		92.63	RNA-seq on Human E72 Skeletal Tissue	79
					H28852_FM1	7.3	Kapa mRNA Hyper prep (25 ng)	IDT_8nt_UDI_TruSeq_i7_229	AACCTTGG	IDT_8nt_UDI_TruSeq_i5_229	CAGATCCT	MiSeq Nano	Paired End	150	1	3169	20928430	92.8	RNA-seq on Human E72 Skeletal Tissue	80
												NovaSeq S4	Paired End	100	4	3252152		90.84	RNA-seq on Human E72 Skeletal Tissue	80
												NovaSeq S4	Paired End	100	2	2698517		91.18	RNA-seq on Human E72 Skeletal Tissue	80
												NovaSeq S4	Paired End	100	3	2965187		91.02	RNA-seq on Human E72 Skeletal Tissue	80
												NovaSeq S4	Paired End	100	4	1748848		90.65	RNA-seq on Human E72 Skeletal Tissue	80
												NovaSeq S4	Paired End	100	2	4363401		90.92	RNA-seq on Human E72 Skeletal Tissue	80
												NovaSeq S4	Paired End	100	1	5897156		91.66	RNA-seq on Human E72 Skeletal Tissue	80
					H28852_FM2	8.1	Kapa mRNA Hyper prep (25 ng)	IDT_8nt_UDI_TruSeq_i7_241	CAAGTGCA	IDT_8nt_UDI_TruSeq_i5_241	CATACTCG	MiSeq Nano	Paired End	150	1	3922	23661690	94	RNA-seq on Human E72 Skeletal Tissue	81
												NovaSeq S4	Paired End	100	4	3623912		90.67	RNA-seq on Human E72 Skeletal Tissue	81
												NovaSeq S4	Paired End	100	2	2961672		91.05	RNA-seq on Human E72 Skeletal Tissue	81
												NovaSeq S4	Paired End	100	3	3280933		90.84	RNA-seq on Human E72 Skeletal Tissue	81
												NovaSeq S4	Paired End	100	4	1887341		90.43	RNA-seq on Human E72 Skeletal Tissue	81
												NovaSeq S4	Paired End	100	2	5068471		90.56	RNA-seq on Human E72 Skeletal Tissue	81
												NovaSeq S4	Paired End	100	1	6835439		91.64	RNA-seq on Human E72 Skeletal Tissue	81
					H28852_FM3	5.7	Kapa mRNA Hyper prep (25 ng)	IDT_8nt_UDI_TruSeq_i7_253	GTAGCATC	IDT_8nt_UDI_TruSeq_i5_253	AGACCTTG	MiSeq Nano	Paired End	150	1	4259	26601116	94.95	RNA-seq on Human E72 Skeletal Tissue	82
												NovaSeq S4	Paired End	100	4	4011359		92.06	RNA-seq on Human E72 Skeletal Tissue	82
												NovaSeq S4	Paired End	100	2	3517312		92.43	RNA-seq on Human E72 Skeletal Tissue	82
												NovaSeq S4	Paired End	100	3	3866139		92.24	RNA-seq on Human E72 Skeletal Tissue	82
												NovaSeq S4	Paired End	100	4	2949284		91.91	RNA-seq on Human E72 Skeletal Tissue	82
												NovaSeq S4	Paired End	100	2	5243057		91.97	RNA-seq on Human E72 Skeletal Tissue	82
												NovaSeq S4	Paired End	100	1	7009706		92.78	RNA-seq on Human E72 Skeletal Tissue	82
					H28852_FM4	7.7	Kapa mRNA Hyper prep (25 ng)	IDT_8nt_UDI_TruSeq_i7_265	AAGGCTGA	IDT_8nt_UDI_TruSeq_i5_265	CTGTATGC	MiSeq Nano	Paired End	150	1	2453	15106944	91.96	RNA-seq on Human E72 Skeletal Tissue	83
												NovaSeq S4	Paired End	100	4	2204404		90.19	RNA-seq on Human E72 Skeletal Tissue	83
												NovaSeq S4	Paired End	100	2	1957657		90.49	RNA-seq on Human E72 Skeletal Tissue	83
												NovaSeq S4	Paired End	100	3	2320096		90.34	RNA-seq on Human E72 Skeletal Tissue	83
												NovaSeq S4	Paired End	100	4	1901161		89.93	RNA-seq on Human E72 Skeletal Tissue	83
												NovaSeq S4	Paired End	100	2	2867877		90.44	RNA-seq on Human E72 Skeletal Tissue	83
												NovaSeq S4	Paired End	100	1	3853296		91.25	RNA-seq on Human E72 Skeletal Tissue	83
					H28852_FM5	7.6	Kapa mRNA Hyper prep (25 ng)	IDT_8nt_UDI_TruSeq_i7_277	AACGGTCA	IDT_8nt_UDI_TruSeq_i5_277	TAGTGGTG	MiSeq Nano	Paired End	150	1	3869	22535272	95.16	RNA-seq on Human E72 Skeletal Tissue	84
												NovaSeq S4	Paired End	100	4	3563565		91.54	RNA-seq on Human E72 Skeletal Tissue	84
												NovaSeq S4	Paired End	100	2	2595343		92.34	RNA-seq on Human E72 Skeletal Tissue	84
												NovaSeq S4	Paired End	100	3	2985619		92.09	RNA-seq on Human E72 Skeletal Tissue	84
												NovaSeq S4	Paired End	100	4	1741366		91.83	RNA-seq on Human E72 Skeletal Tissue	84
												NovaSeq S4	Paired End	100	2	4757511		91.71	RNA-seq on Human E72 Skeletal Tissue	84
												NovaSeq S4	Paired End	100	1	6887999		92.34	RNA-seq on Human E72 Skeletal Tissue	84
																				85
Late 5	H28693B	E72	Male	2021-01-22	H28693B_HP1	7.7	Kapa mRNA Hyper prep (25 ng)	IDT_8nt_UDI_TruSeq_i7_194	GTCTAGGT	IDT_8nt_UDI_TruSeq_i5_194	ATCCACGA	MiSeq Nano	Paired End	150	1	4462	31550863	95.86	RNA-seq on Human E72 Skeletal Tissue	86
												NovaSeq S4	Paired End	100	4	4674235		91.18	RNA-seq on Human E72 Skeletal Tissue	86
												NovaSeq S4	Paired End	100	2	4170035		91.73	RNA-seq on Human E72 Skeletal Tissue	86
												NovaSeq S4	Paired End	100	3	4674610		91.43	RNA-seq on Human E72 Skeletal Tissue	86
												NovaSeq S4	Paired End	100	4	3643778		91.03	RNA-seq on Human E72 Skeletal Tissue	86
												NovaSeq S4	Paired End	100	2	6257212		91.17	RNA-seq on Human E72 Skeletal Tissue	86
												NovaSeq S4	Paired End	100	1	8126531		92.55	RNA-seq on Human E72 Skeletal Tissue	86
					H28693B_HP2	7.2	Kapa mRNA Hyper prep (25 ng)	IDT_8nt_UDI_TruSeq_i7_206	ACGGTCTT	IDT_8nt_UDI_TruSeq_i5_206	AACTCGGA	MiSeq Nano	Paired End	150	1	4675	35218345	95.75	RNA-seq on Human E72 Skeletal Tissue	87
												NovaSeq S4	Paired End	100	4	5373687		91.98	RNA-seq on Human E72 Skeletal Tissue	87
												NovaSeq S4	Paired End	100	2	4544470		92.38	RNA-seq on Human E72 Skeletal Tissue	87
												NovaSeq S4	Paired End	100	3	5006116		92.26	RNA-seq on Human E72 Skeletal Tissue	87
												NovaSeq S4	Paired End	100	4	3092332		91.81	RNA-seq on Human E72 Skeletal Tissue	87
												NovaSeq S4	Paired End	100	2	7506478		91.92	RNA-seq on Human E72 Skeletal Tissue	87
												NovaSeq S4	Paired End	100	1	9690587		92.96	RNA-seq on Human E72 Skeletal Tissue	87
					H28693B_HP3	6.9	Kapa mRNA Hyper prep (25 ng)	IDT_8nt_UDI_TruSeq_i7_218	CTGGTTCT	IDT_8nt_UDI_TruSeq_i5_218	GATACCTG	MiSeq Nano	Paired End	150	1	4445	31114194	95.22	RNA-seq on Human E72 Skeletal Tissue	88
												NovaSeq S4	Paired End	100	4	4861096		91.84	RNA-seq on Human E72 Skeletal Tissue	88
												NovaSeq S4	Paired End	100	2	3898472		92.32	RNA-seq on Human E72 Skeletal Tissue	88
												NovaSeq S4	Paired End	100	3	4366808		92.07	RNA-seq on Human E72 Skeletal Tissue	88
												NovaSeq S4	Paired End	100	4	2565887		91.76	RNA-seq on Human E72 Skeletal Tissue	88
												NovaSeq S4	Paired End	100	2	6591785		91.72	RNA-seq on Human E72 Skeletal Tissue	88
												NovaSeq S4	Paired End	100	1	8825701		92.57	RNA-seq on Human E72 Skeletal Tissue	88
					H28693B_HP4	7	Kapa mRNA Hyper prep (25 ng)	IDT_8nt_UDI_TruSeq_i7_230	CCATACGT	IDT_8nt_UDI_TruSeq_i5_230	CTCTTGTC	MiSeq Nano	Paired End	150	1	4778	30841185	95.85	RNA-seq on Human E72 Skeletal Tissue	89
												NovaSeq S4	Paired End	100	4	4482948		92.08	RNA-seq on Human E72 Skeletal Tissue	89
												NovaSeq S4	Paired End	100	2	3985380		92.51	RNA-seq on Human E72 Skeletal Tissue	89
												NovaSeq S4	Paired End	100	3	4712762		92.34	RNA-seq on Human E72 Skeletal Tissue	89
												NovaSeq S4	Paired End	100	4	3886429		91.99	RNA-seq on Human E72 Skeletal Tissue	89
												NovaSeq S4	Paired End	100	2	5912388		92.02	RNA-seq on Human E72 Skeletal Tissue	89
												NovaSeq S4	Paired End	100	1	7856500		93.05	RNA-seq on Human E72 Skeletal Tissue	89
					H28693B_HP5	7	Kapa mRNA Hyper prep (25 ng)	IDT_8nt_UDI_TruSeq_i7_242	TCGAGTGA	IDT_8nt_UDI_TruSeq_i5_242	AACCTACG	MiSeq Nano	Paired End	150	1	4290	26130337	93.97	RNA-seq on Human E72 Skeletal Tissue	90
												NovaSeq S4	Paired End	100	4	4031731		91.51	RNA-seq on Human E72 Skeletal Tissue	90
												NovaSeq S4	Paired End	100	2	3342674		91.88	RNA-seq on Human E72 Skeletal Tissue	90
												NovaSeq S4	Paired End	100	3	3739180		91.68	RNA-seq on Human E72 Skeletal Tissue	90
												NovaSeq S4	Paired End	100	4	2301645		91.26	RNA-seq on Human E72 Skeletal Tissue	90
												NovaSeq S4	Paired End	100	2	5526991		91.34	RNA-seq on Human E72 Skeletal Tissue	90
												NovaSeq S4	Paired End	100	1	7183826		92.56	RNA-seq on Human E72 Skeletal Tissue	90
					H28693B_HM1	7.6	Kapa mRNA Hyper prep (25 ng)	IDT_8nt_UDI_TruSeq_i7_254	GTGTTCCT	IDT_8nt_UDI_TruSeq_i5_254	TTCGAAGC	MiSeq Nano	Paired End	150	1	4313	30193000	95.22	RNA-seq on Human E72 Skeletal Tissue	91
												NovaSeq S4	Paired End	100	4	4372994		91.91	RNA-seq on Human E72 Skeletal Tissue	91
												NovaSeq S4	Paired End	100	2	3997951		92.41	RNA-seq on Human E72 Skeletal Tissue	91
												NovaSeq S4	Paired End	100	3	4659966		92.25	RNA-seq on Human E72 Skeletal Tissue	91
												NovaSeq S4	Paired End	100	4	3875973		91.88	RNA-seq on Human E72 Skeletal Tissue	91
												NovaSeq S4	Paired End	100	2	5705572		92.2	RNA-seq on Human E72 Skeletal Tissue	91
												NovaSeq S4	Paired End	100	1	7576231		92.88	RNA-seq on Human E72 Skeletal Tissue	91
					H28693B_HM2	7.7	Kapa mRNA Hyper prep (25 ng)	IDT_8nt_UDI_TruSeq_i7_266	CGATGCTT	IDT_8nt_UDI_TruSeq_i5_266	CGTAGATG	MiSeq Nano	Paired End	150	1	4239	32876727	94.29	RNA-seq on Human E72 Skeletal Tissue	92
												NovaSeq S4	Paired End	100	4	4957554		91.38	RNA-seq on Human E72 Skeletal Tissue	92
												NovaSeq S4	Paired End	100	2	4371494		91.81	RNA-seq on Human E72 Skeletal Tissue	92
												NovaSeq S4	Paired End	100	3	4666459		91.68	RNA-seq on Human E72 Skeletal Tissue	92
												NovaSeq S4	Paired End	100	4	3236857		91.25	RNA-seq on Human E72 Skeletal Tissue	92
												NovaSeq S4	Paired End	100	2	6715586		91.52	RNA-seq on Human E72 Skeletal Tissue	92
												NovaSeq S4	Paired End	100	1	8924538		92.18	RNA-seq on Human E72 Skeletal Tissue	92
					H28693B_HM3	7.3	Kapa mRNA Hyper prep (25 ng)	IDT_8nt_UDI_TruSeq_i7_278	AGCAGATG	IDT_8nt_UDI_TruSeq_i5_278	GTACCACA	MiSeq Nano	Paired End	150	1	2806	18688497	94.29	RNA-seq on Human E72 Skeletal Tissue	93
												NovaSeq S4	Paired End	100	4	2759813		90.79	RNA-seq on Human E72 Skeletal Tissue	93
												NovaSeq S4	Paired End	100	2	2470292		91.11	RNA-seq on Human E72 Skeletal Tissue	93
												NovaSeq S4	Paired End	100	3	2732778		90.86	RNA-seq on Human E72 Skeletal Tissue	93
												NovaSeq S4	Paired End	100	4	2058493		90.48	RNA-seq on Human E72 Skeletal Tissue	93
												NovaSeq S4	Paired End	100	2	3771727		90.8	RNA-seq on Human E72 Skeletal Tissue	93
												NovaSeq S4	Paired End	100	1	4892588		91.83	RNA-seq on Human E72 Skeletal Tissue	93
					H28693B_HM4	7.2	Kapa mRNA Hyper prep (25 ng)	IDT_8nt_UDI_TruSeq_i7_195	ACGTCGTA	IDT_8nt_UDI_TruSeq_i5_195	CCATGAAC	MiSeq Nano	Paired End	150	1	4259	30254674	95.08	RNA-seq on Human E72 Skeletal Tissue	94
												NovaSeq S4	Paired End	100	4	4568745		91.06	RNA-seq on Human E72 Skeletal Tissue	94
												NovaSeq S4	Paired End	100	2	4369914		91.52	RNA-seq on Human E72 Skeletal Tissue	94
												NovaSeq S4	Paired End	100	3	4285980		91.32	RNA-seq on Human E72 Skeletal Tissue	94
												NovaSeq S4	Paired End	100	4	3165581		90.9	RNA-seq on Human E72 Skeletal Tissue	94
												NovaSeq S4	Paired End	100	2	5965229		91.15	RNA-seq on Human E72 Skeletal Tissue	94
												NovaSeq S4	Paired End	100	1	7894966		92.32	RNA-seq on Human E72 Skeletal Tissue	94
					H28693B_HM5	7.4	Kapa mRNA Hyper prep (25 ng)	IDT_8nt_UDI_TruSeq_i7_207	GATTGGAG	IDT_8nt_UDI_TruSeq_i5_207	CGAGAGAA	MiSeq Nano	Paired End	150	1	4448	28665723	95.26	RNA-seq on Human E72 Skeletal Tissue	95
												NovaSeq S4	Paired End	100	4	4125224		92.58	RNA-seq on Human E72 Skeletal Tissue	95
												NovaSeq S4	Paired End	100	2	3911122		92.9	RNA-seq on Human E72 Skeletal Tissue	95
												NovaSeq S4	Paired End	100	3	4274570		92.78	RNA-seq on Human E72 Skeletal Tissue	95
												NovaSeq S4	Paired End	100	4	3703513		92.48	RNA-seq on Human E72 Skeletal Tissue	95
												NovaSeq S4	Paired End	100	2	4969537		92.7	RNA-seq on Human E72 Skeletal Tissue	95
												NovaSeq S4	Paired End	100	1	7677309		93.17	RNA-seq on Human E72 Skeletal Tissue	95
					H28693B_FP1	7.7	Kapa mRNA Hyper prep (25 ng)	IDT_8nt_UDI_TruSeq_i7_219	TCGACATC	IDT_8nt_UDI_TruSeq_i5_219	ATCGGAGA	MiSeq Nano	Paired End	150	1	4823	30814463	94.69	RNA-seq on Human E72 Skeletal Tissue	96
												NovaSeq S4	Paired End	100	4	4468801		91.74	RNA-seq on Human E72 Skeletal Tissue	96
												NovaSeq S4	Paired End	100	2	4164139		92.08	RNA-seq on Human E72 Skeletal Tissue	96
												NovaSeq S4	Paired End	100	3	4768858		91.9	RNA-seq on Human E72 Skeletal Tissue	96
												NovaSeq S4	Paired End	100	4	3996588		91.47	RNA-seq on Human E72 Skeletal Tissue	96
												NovaSeq S4	Paired End	100	2	5837583		91.75	RNA-seq on Human E72 Skeletal Tissue	96
												NovaSeq S4	Paired End	100	1	7573671		92.77	RNA-seq on Human E72 Skeletal Tissue	96
					H28693B_FP2	7.7	Kapa mRNA Hyper prep (25 ng)	IDT_8nt_UDI_TruSeq_i7_231	TGGTCCTT	IDT_8nt_UDI_TruSeq_i5_231	AGCCGTAA	MiSeq Nano	Paired End	150	1	5317	43351718	95.21	RNA-seq on Human E72 Skeletal Tissue	97
												NovaSeq S4	Paired End	100	4	6528042		91.97	RNA-seq on Human E72 Skeletal Tissue	97
												NovaSeq S4	Paired End	100	2	5813411		92.41	RNA-seq on Human E72 Skeletal Tissue	97
												NovaSeq S4	Paired End	100	3	6383910		92.16	RNA-seq on Human E72 Skeletal Tissue	97
												NovaSeq S4	Paired End	100	4	4999464		91.82	RNA-seq on Human E72 Skeletal Tissue	97
												NovaSeq S4	Paired End	100	2	8456604		91.94	RNA-seq on Human E72 Skeletal Tissue	97
												NovaSeq S4	Paired End	100	1	11164970		92.82	RNA-seq on Human E72 Skeletal Tissue	97
					H28693B_FP3	7.7	Kapa mRNA Hyper prep (25 ng)	IDT_8nt_UDI_TruSeq_i7_243	CTACAGTG	IDT_8nt_UDI_TruSeq_i5_243	ATACTGGC	MiSeq Nano	Paired End	150	1	4272	25345236	93.09	RNA-seq on Human E72 Skeletal Tissue	98
												NovaSeq S4	Paired End	100	4	3785604		91.12	RNA-seq on Human E72 Skeletal Tissue	98
												NovaSeq S4	Paired End	100	2	3375991		91.42	RNA-seq on Human E72 Skeletal Tissue	98
												NovaSeq S4	Paired End	100	3	3719328		91.27	RNA-seq on Human E72 Skeletal Tissue	98
												NovaSeq S4	Paired End	100	4	2851479		90.79	RNA-seq on Human E72 Skeletal Tissue	98
												NovaSeq S4	Paired End	100	2	5054183		91.11	RNA-seq on Human E72 Skeletal Tissue	98
												NovaSeq S4	Paired End	100	1	6554379		92.29	RNA-seq on Human E72 Skeletal Tissue	98
					H28693B_FP4	7.6	Kapa mRNA Hyper prep (25 ng)	IDT_8nt_UDI_TruSeq_i7_255	AGGATGGT	IDT_8nt_UDI_TruSeq_i5_255	GTATTCCG	MiSeq Nano	Paired End	150	1	4245	28582508	96.03	RNA-seq on Human E72 Skeletal Tissue	99
												NovaSeq S4	Paired End	100	4	4199651		92.11	RNA-seq on Human E72 Skeletal Tissue	99
												NovaSeq S4	Paired End	100	2	3724743		92.57	RNA-seq on Human E72 Skeletal Tissue	99
												NovaSeq S4	Paired End	100	3	4384348		92.36	RNA-seq on Human E72 Skeletal Tissue	99
												NovaSeq S4	Paired End	100	4	3621843		91.94	RNA-seq on Human E72 Skeletal Tissue	99
												NovaSeq S4	Paired End	100	2	5405229		92.14	RNA-seq on Human E72 Skeletal Tissue	99
												NovaSeq S4	Paired End	100	1	7242449		93.16	RNA-seq on Human E72 Skeletal Tissue	99
					H28693B_FP5	7.6	Kapa mRNA Hyper prep (25 ng)	IDT_8nt_UDI_TruSeq_i7_267	GTATTGGC	IDT_8nt_UDI_TruSeq_i5_267	ACCGACAA	MiSeq Nano	Paired End	150	1	3912	21538175	93.9	RNA-seq on Human E72 Skeletal Tissue	100
												NovaSeq S4	Paired End	100	4	3321123		90.98	RNA-seq on Human E72 Skeletal Tissue	100
												NovaSeq S4	Paired End	100	2	3132492		91.38	RNA-seq on Human E72 Skeletal Tissue	100
												NovaSeq S4	Paired End	100	3	3061278		91.25	RNA-seq on Human E72 Skeletal Tissue	100
												NovaSeq S4	Paired End	100	4	2240089		90.81	RNA-seq on Human E72 Skeletal Tissue	100
												NovaSeq S4	Paired End	100	2	4154425		91.1	RNA-seq on Human E72 Skeletal Tissue	100
												NovaSeq S4	Paired End	100	1	5624856		92.13	RNA-seq on Human E72 Skeletal Tissue	100
					H28693B_FM1	7.8	Kapa mRNA Hyper prep (25 ng)	IDT_8nt_UDI_TruSeq_i7_279	TATCAGCG	IDT_8nt_UDI_TruSeq_i5_279	GCCTATGT	MiSeq Nano	Paired End	150	1	4692	29385050	95.06	RNA-seq on Human E72 Skeletal Tissue	101
												NovaSeq S4	Paired End	100	4	4605770		91.11	RNA-seq on Human E72 Skeletal Tissue	101
												NovaSeq S4	Paired End	100	2	3977272		91.63	RNA-seq on Human E72 Skeletal Tissue	101
												NovaSeq S4	Paired End	100	3	4064456		91.45	RNA-seq on Human E72 Skeletal Tissue	101
												NovaSeq S4	Paired End	100	4	2605306		91.05	RNA-seq on Human E72 Skeletal Tissue	101
												NovaSeq S4	Paired End	100	2	5980331		91.12	RNA-seq on Human E72 Skeletal Tissue	101
												NovaSeq S4	Paired End	100	1	8147223		92.17	RNA-seq on Human E72 Skeletal Tissue	101
					H28693B_FM2	7.6	Kapa mRNA Hyper prep (25 ng)	IDT_8nt_UDI_TruSeq_i7_196	GAGCTCAA	IDT_8nt_UDI_TruSeq_i5_196	GCATCCTA	MiSeq Nano	Paired End	150	1	4923	32016274	95.84	RNA-seq on Human E72 Skeletal Tissue	102
												NovaSeq S4	Paired End	100	4	4877346		92.02	RNA-seq on Human E72 Skeletal Tissue	102
												NovaSeq S4	Paired End	100	2	4510053		92.43	RNA-seq on Human E72 Skeletal Tissue	102
												NovaSeq S4	Paired End	100	3	4559795		92.28	RNA-seq on Human E72 Skeletal Tissue	102
												NovaSeq S4	Paired End	100	4	3267058		91.9	RNA-seq on Human E72 Skeletal Tissue	102
												NovaSeq S4	Paired End	100	2	6337166		91.93	RNA-seq on Human E72 Skeletal Tissue	102
												NovaSeq S4	Paired End	100	1	8459933		93.06	RNA-seq on Human E72 Skeletal Tissue	102
					H28693B_FM3	8.1	Kapa mRNA Hyper prep (25 ng)	IDT_8nt_UDI_TruSeq_i7_208	TGTCCAGA	IDT_8nt_UDI_TruSeq_i5_208	GCCAGAAT	MiSeq Nano	Paired End	150	1	5260	30057567	94.96	RNA-seq on Human E72 Skeletal Tissue	103
												NovaSeq S4	Paired End	100	4	4664608		91.11	RNA-seq on Human E72 Skeletal Tissue	103
												NovaSeq S4	Paired End	100	2	3828593		91.57	RNA-seq on Human E72 Skeletal Tissue	103
												NovaSeq S4	Paired End	100	3	4163046		91.36	RNA-seq on Human E72 Skeletal Tissue	103
												NovaSeq S4	Paired End	100	4	2563846		90.86	RNA-seq on Human E72 Skeletal Tissue	103
												NovaSeq S4	Paired End	100	2	6385242		91.06	RNA-seq on Human E72 Skeletal Tissue	103
												NovaSeq S4	Paired End	100	1	8446972		92.28	RNA-seq on Human E72 Skeletal Tissue	103
					H28693B_FM4	8	Kapa mRNA Hyper prep (25 ng)	IDT_8nt_UDI_TruSeq_i7_220	AACCTCCT	IDT_8nt_UDI_TruSeq_i5_220	AGGCTGAA	MiSeq Nano	Paired End	150	1	5283	38279376	96.12	RNA-seq on Human E72 Skeletal Tissue	104
												NovaSeq S4	Paired End	100	4	5729773		91.68	RNA-seq on Human E72 Skeletal Tissue	104
												NovaSeq S4	Paired End	100	2	5036127		92.33	RNA-seq on Human E72 Skeletal Tissue	104
												NovaSeq S4	Paired End	100	3	5539711		92.05	RNA-seq on Human E72 Skeletal Tissue	104
												NovaSeq S4	Paired End	100	4	4205756		91.72	RNA-seq on Human E72 Skeletal Tissue	104
												NovaSeq S4	Paired End	100	2	7637853		91.8	RNA-seq on Human E72 Skeletal Tissue	104
												NovaSeq S4	Paired End	100	1	10124873		92.73	RNA-seq on Human E72 Skeletal Tissue	104
					H28693B_FM5	8.2	Kapa mRNA Hyper prep (25 ng)	IDT_8nt_UDI_TruSeq_i7_232	ACCGCATA	IDT_8nt_UDI_TruSeq_i5_232	ACAACAGC	MiSeq Nano	Paired End	150	1	4430	29487207	94.21	RNA-seq on Human E72 Skeletal Tissue	105
												NovaSeq S4	Paired End	100	4	4516600		91.03	RNA-seq on Human E72 Skeletal Tissue	105
												NovaSeq S4	Paired End	100	2	3839836		91.53	RNA-seq on Human E72 Skeletal Tissue	105
												NovaSeq S4	Paired End	100	3	4119934		91.34	RNA-seq on Human E72 Skeletal Tissue	105
												NovaSeq S4	Paired End	100	4	2783692		90.88	RNA-seq on Human E72 Skeletal Tissue	105
												NovaSeq S4	Paired End	100	2	6095174		91.1	RNA-seq on Human E72 Skeletal Tissue	105
												NovaSeq S4	Paired End	100	1	8127541		92.18	RNA-seq on Human E72 Skeletal Tissue	105
																				106
Late 6	H28693A	E74	Male	2021-01-22	H28693A_HP1	7.3	Kapa mRNA Hyper prep (25 ng)	IDT_8nt_UDI_TruSeq_i7_244	GATCGTAC	IDT_8nt_UDI_TruSeq_i5_244	CCTTCCAT	MiSeq Nano	Paired End	150	1	4645	32818177	95.05	RNA-seq on Human E74 Skeletal Tissue	107
												NovaSeq S4	Paired End	100	4	5053752		92.31	RNA-seq on Human E74 Skeletal Tissue	107
												NovaSeq S4	Paired End	100	2	4734681		92.58	RNA-seq on Human E74 Skeletal Tissue	107
												NovaSeq S4	Paired End	100	3	4671096		92.49	RNA-seq on Human E74 Skeletal Tissue	107
												NovaSeq S4	Paired End	100	4	3392341		92.09	RNA-seq on Human E74 Skeletal Tissue	107
												NovaSeq S4	Paired End	100	2	6464924		92.17	RNA-seq on Human E74 Skeletal Tissue	107
												NovaSeq S4	Paired End	100	1	8496738		93.16	RNA-seq on Human E74 Skeletal Tissue	107
					H28693A_HP2	7.2	Kapa mRNA Hyper prep (25 ng)	IDT_8nt_UDI_TruSeq_i7_256	TCACGTTC	IDT_8nt_UDI_TruSeq_i5_256	CACCAGTT	MiSeq Nano	Paired End	150	1	4341	27710722	95.24	RNA-seq on Human E74 Skeletal Tissue	108
												NovaSeq S4	Paired End	100	4	4314207		92.57	RNA-seq on Human E74 Skeletal Tissue	108
												NovaSeq S4	Paired End	100	2	3487990		92.83	RNA-seq on Human E74 Skeletal Tissue	108
												NovaSeq S4	Paired End	100	3	3905971		92.77	RNA-seq on Human E74 Skeletal Tissue	108
												NovaSeq S4	Paired End	100	4	2397324		92.33	RNA-seq on Human E74 Skeletal Tissue	108
												NovaSeq S4	Paired End	100	2	5882873		92.32	RNA-seq on Human E74 Skeletal Tissue	108
												NovaSeq S4	Paired End	100	1	7718016		93.29	RNA-seq on Human E74 Skeletal Tissue	108
					H28693A_HP3	6.7	Kapa mRNA Hyper prep (25 ng)	IDT_8nt_UDI_TruSeq_i7_268	ACTGTGTC	IDT_8nt_UDI_TruSeq_i5_268	TTCGGCTA	MiSeq Nano	Paired End	150	1	4068	28593373	95.24	RNA-seq on Human E74 Skeletal Tissue	109
												NovaSeq S4	Paired End	100	4	4169989		91.79	RNA-seq on Human E74 Skeletal Tissue	109
												NovaSeq S4	Paired End	100	2	3739607		92.13	RNA-seq on Human E74 Skeletal Tissue	109
												NovaSeq S4	Paired End	100	3	4413259		91.96	RNA-seq on Human E74 Skeletal Tissue	109
												NovaSeq S4	Paired End	100	4	3694008		91.54	RNA-seq on Human E74 Skeletal Tissue	109
												NovaSeq S4	Paired End	100	2	5389242		91.84	RNA-seq on Human E74 Skeletal Tissue	109
												NovaSeq S4	Paired End	100	1	7183200		92.64	RNA-seq on Human E74 Skeletal Tissue	109
					H28693A_HP4	6.7	Kapa mRNA Hyper prep (25 ng)	IDT_8nt_UDI_TruSeq_i7_280	TCAGACGA	IDT_8nt_UDI_TruSeq_i5_280	ACTGCTTG	MiSeq Nano	Paired End	150	1	4664	25881409	95.35	RNA-seq on Human E74 Skeletal Tissue	110
												NovaSeq S4	Paired End	100	4	3966446		92.1	RNA-seq on Human E74 Skeletal Tissue	110
												NovaSeq S4	Paired End	100	2	3740694		92.58	RNA-seq on Human E74 Skeletal Tissue	110
												NovaSeq S4	Paired End	100	3	3693484		92.39	RNA-seq on Human E74 Skeletal Tissue	110
												NovaSeq S4	Paired End	100	4	2658918		92.08	RNA-seq on Human E74 Skeletal Tissue	110
												NovaSeq S4	Paired End	100	2	4958331		92.07	RNA-seq on Human E74 Skeletal Tissue	110
												NovaSeq S4	Paired End	100	1	6858872		92.89	RNA-seq on Human E74 Skeletal Tissue	110
					H28693A_HP5	7	Kapa mRNA Hyper prep (25 ng)	IDT_8nt_UDI_TruSeq_i7_197	CGTGTACT	IDT_8nt_UDI_TruSeq_i5_197	GTTCCATG	MiSeq Nano	Paired End	150	1	4769	29292610	95.84	RNA-seq on Human E74 Skeletal Tissue	111
												NovaSeq S4	Paired End	100	4	4431934		92.12	RNA-seq on Human E74 Skeletal Tissue	111
												NovaSeq S4	Paired End	100	2	3733689		92.6	RNA-seq on Human E74 Skeletal Tissue	111
												NovaSeq S4	Paired End	100	3	4122322		92.39	RNA-seq on Human E74 Skeletal Tissue	111
												NovaSeq S4	Paired End	100	4	3153558		91.95	RNA-seq on Human E74 Skeletal Tissue	111
												NovaSeq S4	Paired End	100	2	5880063		92.1	RNA-seq on Human E74 Skeletal Tissue	111
												NovaSeq S4	Paired End	100	1	7966275		93.09	RNA-seq on Human E74 Skeletal Tissue	111
					H28693A_HM1	7.2	Kapa mRNA Hyper prep (25 ng)	IDT_8nt_UDI_TruSeq_i7_209	CCAGTGTT	IDT_8nt_UDI_TruSeq_i5_209	CTAGCAGT	MiSeq Nano	Paired End	150	1	4499	36943619	94.71	RNA-seq on Human E74 Skeletal Tissue	112
												NovaSeq S4	Paired End	100	4	5358980		91.46	RNA-seq on Human E74 Skeletal Tissue	112
												NovaSeq S4	Paired End	100	2	4907531		91.9	RNA-seq on Human E74 Skeletal Tissue	112
												NovaSeq S4	Paired End	100	3	5722978		91.7	RNA-seq on Human E74 Skeletal Tissue	112
												NovaSeq S4	Paired End	100	4	4829781		91.27	RNA-seq on Human E74 Skeletal Tissue	112
												NovaSeq S4	Paired End	100	2	6963943		91.6	RNA-seq on Human E74 Skeletal Tissue	112
												NovaSeq S4	Paired End	100	1	9155907		92.47	RNA-seq on Human E74 Skeletal Tissue	112
					H28693A_HM2	7.6	Kapa mRNA Hyper prep (25 ng)	IDT_8nt_UDI_TruSeq_i7_221	CAGCGATT	IDT_8nt_UDI_TruSeq_i5_221	CTCTCAGA	MiSeq Nano	Paired End	150	1	4313	35165497	95.19	RNA-seq on Human E74 Skeletal Tissue	113
												NovaSeq S4	Paired End	100	4	5067142		92.03	RNA-seq on Human E74 Skeletal Tissue	113
												NovaSeq S4	Paired End	100	2	4660794		92.29	RNA-seq on Human E74 Skeletal Tissue	113
												NovaSeq S4	Paired End	100	3	5425809		92.22	RNA-seq on Human E74 Skeletal Tissue	113
												NovaSeq S4	Paired End	100	4	4576964		91.75	RNA-seq on Human E74 Skeletal Tissue	113
												NovaSeq S4	Paired End	100	2	6663863		92.01	RNA-seq on Human E74 Skeletal Tissue	113
												NovaSeq S4	Paired End	100	1	8766612		93.02	RNA-seq on Human E74 Skeletal Tissue	113
					H28693A_HM3	7.3	Kapa mRNA Hyper prep (25 ng)	IDT_8nt_UDI_TruSeq_i7_233	CCTTCCTT	IDT_8nt_UDI_TruSeq_i5_233	CTTCGGTT	MiSeq Nano	Paired End	150	1	4926	33976754	95.04	RNA-seq on Human E74 Skeletal Tissue	114
												NovaSeq S4	Paired End	100	4	5047491		92.16	RNA-seq on Human E74 Skeletal Tissue	114
												NovaSeq S4	Paired End	100	2	4467439		92.55	RNA-seq on Human E74 Skeletal Tissue	114
												NovaSeq S4	Paired End	100	3	5089316		92.37	RNA-seq on Human E74 Skeletal Tissue	114
												NovaSeq S4	Paired End	100	4	4068443		92.04	RNA-seq on Human E74 Skeletal Tissue	114
												NovaSeq S4	Paired End	100	2	6593120		92.27	RNA-seq on Human E74 Skeletal Tissue	114
												NovaSeq S4	Paired End	100	1	8706019		92.94	RNA-seq on Human E74 Skeletal Tissue	114
					H28693A_HM4	6.3	Kapa mRNA Hyper prep (25 ng)	IDT_8nt_UDI_TruSeq_i7_245	CTTCACCA	IDT_8nt_UDI_TruSeq_i5_245	TGGCTCTT	MiSeq Nano	Paired End	150	1	4332	27648984	95.2	RNA-seq on Human E74 Skeletal Tissue	115
												NovaSeq S4	Paired End	100	4	4237626		92.22	RNA-seq on Human E74 Skeletal Tissue	115
												NovaSeq S4	Paired End	100	2	3603811		92.55	RNA-seq on Human E74 Skeletal Tissue	115
												NovaSeq S4	Paired End	100	3	3881450		92.41	RNA-seq on Human E74 Skeletal Tissue	115
												NovaSeq S4	Paired End	100	4	2805892		91.92	RNA-seq on Human E74 Skeletal Tissue	115
												NovaSeq S4	Paired End	100	2	5593728		92.06	RNA-seq on Human E74 Skeletal Tissue	115
												NovaSeq S4	Paired End	100	1	7522145		93.15	RNA-seq on Human E74 Skeletal Tissue	115
					H28693A_HM5	7.1	Kapa mRNA Hyper prep (25 ng)	IDT_8nt_UDI_TruSeq_i7_257	GCGTTCTA	IDT_8nt_UDI_TruSeq_i5_257	CAAGAAGC	MiSeq Nano	Paired End	150	1	3578	20074846	94.83	RNA-seq on Human E74 Skeletal Tissue	116
												NovaSeq S4	Paired End	100	4	3107232		91.85	RNA-seq on Human E74 Skeletal Tissue	116
												NovaSeq S4	Paired End	100	2	2575146		92.21	RNA-seq on Human E74 Skeletal Tissue	116
												NovaSeq S4	Paired End	100	3	2863938		92.14	RNA-seq on Human E74 Skeletal Tissue	116
												NovaSeq S4	Paired End	100	4	1747764		91.74	RNA-seq on Human E74 Skeletal Tissue	116
												NovaSeq S4	Paired End	100	2	4149297		91.87	RNA-seq on Human E74 Skeletal Tissue	116
												NovaSeq S4	Paired End	100	1	5627891		92.66	RNA-seq on Human E74 Skeletal Tissue	116
					H28693A_FP1	7.5	Kapa mRNA Hyper prep (25 ng)	IDT_8nt_UDI_TruSeq_i7_269	TGCCTCTT	IDT_8nt_UDI_TruSeq_i5_269	CTATGCCT	MiSeq Nano	Paired End	150	1	3658	31613551	94.07	RNA-seq on Human E74 Skeletal Tissue	117
												NovaSeq S4	Paired End	100	4	4582467		90.82	RNA-seq on Human E74 Skeletal Tissue	117
												NovaSeq S4	Paired End	100	2	4189963		91.17	RNA-seq on Human E74 Skeletal Tissue	117
												NovaSeq S4	Paired End	100	3	4885178		91.03	RNA-seq on Human E74 Skeletal Tissue	117
												NovaSeq S4	Paired End	100	4	4152198		90.56	RNA-seq on Human E74 Skeletal Tissue	117
												NovaSeq S4	Paired End	100	2	5926611		90.96	RNA-seq on Human E74 Skeletal Tissue	117
												NovaSeq S4	Paired End	100	1	7873476		91.86	RNA-seq on Human E74 Skeletal Tissue	117
					H28693A_FP2	7.8	Kapa mRNA Hyper prep (25 ng)	IDT_8nt_UDI_TruSeq_i7_281	ACCATGTG	IDT_8nt_UDI_TruSeq_i5_281	TTACGTGC	MiSeq Nano	Paired End	150	1	3946	24734754	94.23	RNA-seq on Human E74 Skeletal Tissue	118
												NovaSeq S4	Paired End	100	4	3723180		90.7	RNA-seq on Human E74 Skeletal Tissue	118
												NovaSeq S4	Paired End	100	2	3263858		91.29	RNA-seq on Human E74 Skeletal Tissue	118
												NovaSeq S4	Paired End	100	3	3599051		91.01	RNA-seq on Human E74 Skeletal Tissue	118
												NovaSeq S4	Paired End	100	4	2735287		90.64	RNA-seq on Human E74 Skeletal Tissue	118
												NovaSeq S4	Paired End	100	2	4811760		90.99	RNA-seq on Human E74 Skeletal Tissue	118
												NovaSeq S4	Paired End	100	1	6597672		91.77	RNA-seq on Human E74 Skeletal Tissue	118
					H28693A_FP3	7.6	Kapa mRNA Hyper prep (25 ng)	IDT_8nt_UDI_TruSeq_i7_198	CACTGACA	IDT_8nt_UDI_TruSeq_i5_198	AGCTAAGC	MiSeq Nano	Paired End	150	1	4482	29866185	95.01	RNA-seq on Human E74 Skeletal Tissue	119
												NovaSeq S4	Paired End	100	4	4279916		91.17	RNA-seq on Human E74 Skeletal Tissue	119
												NovaSeq S4	Paired End	100	2	4215065		91.62	RNA-seq on Human E74 Skeletal Tissue	119
												NovaSeq S4	Paired End	100	3	4550436		91.43	RNA-seq on Human E74 Skeletal Tissue	119
												NovaSeq S4	Paired End	100	4	3878687		91.02	RNA-seq on Human E74 Skeletal Tissue	119
												NovaSeq S4	Paired End	100	2	5622923		91.21	RNA-seq on Human E74 Skeletal Tissue	119
												NovaSeq S4	Paired End	100	1	7314676		92.37	RNA-seq on Human E74 Skeletal Tissue	119
					H28693A_FP4	7.7	Kapa mRNA Hyper prep (25 ng)	IDT_8nt_UDI_TruSeq_i7_210	TGCACCAA	IDT_8nt_UDI_TruSeq_i5_210	CCGTTATG	MiSeq Nano	Paired End	150	1	4735	29247187	95.39	RNA-seq on Human E74 Skeletal Tissue	120
												NovaSeq S4	Paired End	100	4	4475393		92.05	RNA-seq on Human E74 Skeletal Tissue	120
												NovaSeq S4	Paired End	100	2	4062613		92.56	RNA-seq on Human E74 Skeletal Tissue	120
												NovaSeq S4	Paired End	100	3	4040681		92.38	RNA-seq on Human E74 Skeletal Tissue	120
												NovaSeq S4	Paired End	100	4	2841778		92.07	RNA-seq on Human E74 Skeletal Tissue	120
												NovaSeq S4	Paired End	100	2	5870245		91.92	RNA-seq on Human E74 Skeletal Tissue	120
												NovaSeq S4	Paired End	100	1	7951742		92.97	RNA-seq on Human E74 Skeletal Tissue	120
					H28693A_FP5	6.4	Kapa mRNA Hyper prep (25 ng)	IDT_8nt_UDI_TruSeq_i7_222	AGGTCACT	IDT_8nt_UDI_TruSeq_i5_222	CGACCTAA	MiSeq Nano	Paired End	150	1	4582	32276917	95.78	RNA-seq on Human E74 Skeletal Tissue	121
												NovaSeq S4	Paired End	100	4	4845174		91.25	RNA-seq on Human E74 Skeletal Tissue	121
												NovaSeq S4	Paired End	100	2	4303748		91.81	RNA-seq on Human E74 Skeletal Tissue	121
												NovaSeq S4	Paired End	100	3	4707032		91.52	RNA-seq on Human E74 Skeletal Tissue	121
												NovaSeq S4	Paired End	100	4	3625275		91.15	RNA-seq on Human E74 Skeletal Tissue	121
												NovaSeq S4	Paired End	100	2	6375164		91.29	RNA-seq on Human E74 Skeletal Tissue	121
												NovaSeq S4	Paired End	100	1	8415942		92.46	RNA-seq on Human E74 Skeletal Tissue	121
					H28693A_FM1	7.9	Kapa mRNA Hyper prep (25 ng)	IDT_8nt_UDI_TruSeq_i7_234	TACACGCT	IDT_8nt_UDI_TruSeq_i5_234	AGAGCAGA	MiSeq Nano	Paired End	150	1	4853	35280180	95.45	RNA-seq on Human E74 Skeletal Tissue	122
												NovaSeq S4	Paired End	100	4	5067737		91.77	RNA-seq on Human E74 Skeletal Tissue	122
												NovaSeq S4	Paired End	100	2	5052299		92.29	RNA-seq on Human E74 Skeletal Tissue	122
												NovaSeq S4	Paired End	100	3	5401946		92.09	RNA-seq on Human E74 Skeletal Tissue	122
												NovaSeq S4	Paired End	100	4	4667938		91.7	RNA-seq on Human E74 Skeletal Tissue	122
												NovaSeq S4	Paired End	100	2	6532706		91.99	RNA-seq on Human E74 Skeletal Tissue	122
												NovaSeq S4	Paired End	100	1	8552701		92.96	RNA-seq on Human E74 Skeletal Tissue	122
					H28693A_FM2	7.7	Kapa mRNA Hyper prep (25 ng)	IDT_8nt_UDI_TruSeq_i7_246	CTCAGCTA	IDT_8nt_UDI_TruSeq_i5_246	TCTACGCA	MiSeq Nano	Paired End	150	1	4611	29430076	94.47	RNA-seq on Human E74 Skeletal Tissue	123
												NovaSeq S4	Paired End	100	4	4527585		91.81	RNA-seq on Human E74 Skeletal Tissue	123
												NovaSeq S4	Paired End	100	2	3836734		92.16	RNA-seq on Human E74 Skeletal Tissue	123
												NovaSeq S4	Paired End	100	3	4129295		92.01	RNA-seq on Human E74 Skeletal Tissue	123
												NovaSeq S4	Paired End	100	4	2741841		91.57	RNA-seq on Human E74 Skeletal Tissue	123
												NovaSeq S4	Paired End	100	2	6185122		91.64	RNA-seq on Human E74 Skeletal Tissue	123
												NovaSeq S4	Paired End	100	1	8004888		92.87	RNA-seq on Human E74 Skeletal Tissue	123
					H28693A_FM3	8.3	Kapa mRNA Hyper prep (25 ng)	IDT_8nt_UDI_TruSeq_i7_258	CTCTGGTT	IDT_8nt_UDI_TruSeq_i5_258	CGAATTGC	MiSeq Nano	Paired End	150	1	4698	28930703	95.73	RNA-seq on Human E74 Skeletal Tissue	124
												NovaSeq S4	Paired End	100	4	4363612		92.01	RNA-seq on Human E74 Skeletal Tissue	124
												NovaSeq S4	Paired End	100	2	3795203		92.42	RNA-seq on Human E74 Skeletal Tissue	124
												NovaSeq S4	Paired End	100	3	4069980		92.23	RNA-seq on Human E74 Skeletal Tissue	124
												NovaSeq S4	Paired End	100	4	2761961		91.82	RNA-seq on Human E74 Skeletal Tissue	124
												NovaSeq S4	Paired End	100	2	5958647		92	RNA-seq on Human E74 Skeletal Tissue	124
												NovaSeq S4	Paired End	100	1	7976602		92.91	RNA-seq on Human E74 Skeletal Tissue	124
					H28693A_FM4	8	Kapa mRNA Hyper prep (25 ng)	IDT_8nt_UDI_TruSeq_i7_270	CAGTCTTC	IDT_8nt_UDI_TruSeq_i5_270	CCTGTCAA	MiSeq Nano	Paired End	150	1	4162	26106550	94.71	RNA-seq on Human E74 Skeletal Tissue	125
												NovaSeq S4	Paired End	100	4	3991032		92.27	RNA-seq on Human E74 Skeletal Tissue	125
												NovaSeq S4	Paired End	100	2	3814240		92.53	RNA-seq on Human E74 Skeletal Tissue	125
												NovaSeq S4	Paired End	100	3	3732569		92.43	RNA-seq on Human E74 Skeletal Tissue	125
												NovaSeq S4	Paired End	100	4	2767680		92.07	RNA-seq on Human E74 Skeletal Tissue	125
												NovaSeq S4	Paired End	100	2	5112593		92.22	RNA-seq on Human E74 Skeletal Tissue	125
												NovaSeq S4	Paired End	100	1	6684274		93.06	RNA-seq on Human E74 Skeletal Tissue	125
					H28693A_FM5	8	Kapa mRNA Hyper prep (25 ng)	IDT_8nt_UDI_TruSeq_i7_282	CTAACTCG	IDT_8nt_UDI_TruSeq_i5_282	GACTACGA	MiSeq Nano	Paired End	150	1	2705	16995615	94.82	RNA-seq on Human E74 Skeletal Tissue	126
												NovaSeq S4	Paired End	100	4	2630726		91.6	RNA-seq on Human E74 Skeletal Tissue	126
												NovaSeq S4	Paired End	100	2	2210901		91.97	RNA-seq on Human E74 Skeletal Tissue	126
												NovaSeq S4	Paired End	100	3	2436894		91.83	RNA-seq on Human E74 Skeletal Tissue	126
												NovaSeq S4	Paired End	100	4	1512300		91.49	RNA-seq on Human E74 Skeletal Tissue	126
												NovaSeq S4	Paired End	100	2	3535619		91.47	RNA-seq on Human E74 Skeletal Tissue	126
												NovaSeq S4	Paired End	100	1	4666470		92.52	RNA-seq on Human E74 Skeletal Tissue	126

## Sheet: Pairwise DEGs
ensembl_gene_id	baseMean	log2FoldChange	lfcSE	stat	pvalue	padj	hgnc_symbol	tissue1	tissue2
ensembl_gene_id	baseMean	log2FoldChange	lfcSE	stat	pvalue	padj	hgnc_symbol	tissue1	tissue2
ensembl_gene_id	baseMean	log2FoldChange	lfcSE	stat	pvalue	padj	hgnc_symbol	tissue1	tissue2
ensembl_gene_id	baseMean	log2FoldChange	lfcSE	stat	pvalue	padj	hgnc_symbol	tissue1	tissue2
ensembl_gene_id	baseMean	log2FoldChange	lfcSE	stat	pvalue	padj	hgnc_symbol	tissue1	tissue2
ensembl_gene_id	baseMean	log2FoldChange	lfcSE	stat	pvalue	padj	hgnc_symbol	tissue1	tissue2
ensembl_gene_id	baseMean	log2FoldChange	lfcSE	stat	pvalue	padj	hgnc_symbol	tissue1	tissue2
ensembl_gene_id	baseMean	log2FoldChange	lfcSE	stat	pvalue	padj	hgnc_symbol	tissue1	tissue2
ensembl_gene_id	baseMean	log2FoldChange	lfcSE	stat	pvalue	padj	hgnc_symbol	tissue1	tissue2
ensembl_gene_id	baseMean	log2FoldChange	lfcSE	stat	pvalue	padj	hgnc_symbol	tissue1	tissue2
ensembl_gene_id	baseMean	log2FoldChange	lfcSE	stat	pvalue	padj	hgnc_symbol	tissue1	tissue2
ensembl_gene_id	baseMean	log2FoldChange	lfcSE	stat	pvalue	padj	hgnc_symbol	tissue1	tissue2
ensembl_gene_id	baseMean	log2FoldChange	lfcSE	stat	pvalue	padj	hgnc_symbol	tissue1	tissue2
ensembl_gene_id	baseMean	log2FoldChange	lfcSE	stat	pvalue	padj	hgnc_symbol	tissue1	tissue2
ensembl_gene_id	baseMean	log2FoldChange	lfcSE	stat	pvalue	padj	hgnc_symbol	tissue1	tissue2
ensembl_gene_id	baseMean	log2FoldChange	lfcSE	stat	pvalue	padj	hgnc_symbol	tissue1	tissue2
ensembl_gene_id	baseMean	log2FoldChange	lfcSE	stat	pvalue	padj	hgnc_symbol	tissue1	tissue2
ensembl_gene_id	baseMean	log2FoldChange	lfcSE	stat	pvalue	padj	hgnc_symbol	tissue1	tissue2
ensembl_gene_id	baseMean	log2FoldChange	lfcSE	stat	pvalue	padj	hgnc_symbol	tissue1	tissue2
ensembl_gene_id	baseMean	log2FoldChange	lfcSE	stat	pvalue	padj	hgnc_symbol	tissue1	tissue2
ensembl_gene_id	baseMean	log2FoldChange	lfcSE	stat	pvalue	padj	hgnc_symbol	tissue1	tissue2
ensembl_gene_id	baseMean	log2FoldChange	lfcSE	stat	pvalue	padj	hgnc_symbol	tissue1	tissue2
ensembl_gene_id	baseMean	log2FoldChange	lfcSE	stat	pvalue	padj	hgnc_symbol	tissue1	tissue2
ensembl_gene_id	baseMean	log2FoldChange	lfcSE	stat	pvalue	padj	hgnc_symbol	tissue1	tissue2
ensembl_gene_id	baseMean	log2FoldChange	lfcSE	stat	pvalue	padj	hgnc_symbol	tissue1	tissue2
ensembl_gene_id	baseMean	log2FoldChange	lfcSE	stat	pvalue	padj	hgnc_symbol	tissue1	tissue2
ensembl_gene_id	baseMean	log2FoldChange	lfcSE	stat	pvalue	padj	hgnc_symbol	tissue1	tissue2
ensembl_gene_id	baseMean	log2FoldChange	lfcSE	stat	pvalue	padj	hgnc_symbol	tissue1	tissue2
ensembl_gene_id	baseMean	log2FoldChange	lfcSE	stat	pvalue	padj	hgnc_symbol	tissue1	tissue2
ensembl_gene_id	baseMean	log2FoldChange	lfcSE	stat	pvalue	padj	hgnc_symbol	tissue1	tissue2
ensembl_gene_id	baseMean	log2FoldChange	lfcSE	stat	pvalue	padj	hgnc_symbol	tissue1	tissue2
ensembl_gene_id	baseMean	log2FoldChange	lfcSE	stat	pvalue	padj	hgnc_symbol	tissue1	tissue2
ensembl_gene_id	baseMean	log2FoldChange	lfcSE	stat	pvalue	padj	hgnc_symbol	tissue1	tissue2
ensembl_gene_id	baseMean	log2FoldChange	lfcSE	stat	pvalue	padj	hgnc_symbol	tissue1	tissue2
ensembl_gene_id	baseMean	log2FoldChange	lfcSE	stat	pvalue	padj	hgnc_symbol	tissue1	tissue2
ensembl_gene_id	baseMean	log2FoldChange	lfcSE	stat	pvalue	padj	hgnc_symbol	tissue1	tissue2
ensembl_gene_id	baseMean	log2FoldChange	lfcSE	stat	pvalue	padj	hgnc_symbol	tissue1	tissue2
ensembl_gene_id	baseMean	log2FoldChange	lfcSE	stat	pvalue	padj	hgnc_symbol	tissue1	tissue2
ensembl_gene_id	baseMean	log2FoldChange	lfcSE	stat	pvalue	padj	hgnc_symbol	tissue1	tissue2
ensembl_gene_id	baseMean	log2FoldChange	lfcSE	stat	pvalue	padj	hgnc_symbol	tissue1	tissue2
ensembl_gene_id	baseMean	log2FoldChange	lfcSE	stat	pvalue	padj	hgnc_symbol	tissue1	tissue2
ensembl_gene_id	baseMean	log2FoldChange	lfcSE	stat	pvalue	padj	hgnc_symbol	tissue1	tissue2
ensembl_gene_id	baseMean	log2FoldChange	lfcSE	stat	pvalue	padj	hgnc_symbol	tissue1	tissue2
ensembl_gene_id	baseMean	log2FoldChange	lfcSE	stat	pvalue	padj	hgnc_symbol	tissue1	tissue2
ensembl_gene_id	baseMean	log2FoldChange	lfcSE	stat	pvalue	padj	hgnc_symbol	tissue1	tissue2
ensembl_gene_id	baseMean	log2FoldChange	lfcSE	stat	pvalue	padj	hgnc_symbol	tissue1	tissue2
ensembl_gene_id	baseMean	log2FoldChange	lfcSE	stat	pvalue	padj	hgnc_symbol	tissue1	tissue2
ensembl_gene_id	baseMean	log2FoldChange	lfcSE	stat	pvalue	padj	hgnc_symbol	tissue1	tissue2
ensembl_gene_id	baseMean	log2FoldChange	lfcSE	stat	pvalue	padj	hgnc_symbol	tissue1	tissue2
ensembl_gene_id	baseMean	log2FoldChange	lfcSE	stat	pvalue	padj	hgnc_symbol	tissue1	tissue2
ensembl_gene_id	baseMean	log2FoldChange	lfcSE	stat	pvalue	padj	hgnc_symbol	tissue1	tissue2
ensembl_gene_id	baseMean	log2FoldChange	lfcSE	stat	pvalue	padj	hgnc_symbol	tissue1	tissue2
ensembl_gene_id	baseMean	log2FoldChange	lfcSE	stat	pvalue	padj	hgnc_symbol	tissue1	tissue2
ensembl_gene_id	baseMean	log2FoldChange	lfcSE	stat	pvalue	padj	hgnc_symbol	tissue1	tissue2
ensembl_gene_id	baseMean	log2FoldChange	lfcSE	stat	pvalue	padj	hgnc_symbol	tissue1	tissue2
ensembl_gene_id	baseMean	log2FoldChange	lfcSE	stat	pvalue	padj	hgnc_symbol	tissue1	tissue2
ensembl_gene_id	baseMean	log2FoldChange	lfcSE	stat	pvalue	padj	hgnc_symbol	tissue1	tissue2
ensembl_gene_id	baseMean	log2FoldChange	lfcSE	stat	pvalue	padj	hgnc_symbol	tissue1	tissue2
ensembl_gene_id	baseMean	log2FoldChange	lfcSE	stat	pvalue	padj	hgnc_symbol	tissue1	tissue2
ensembl_gene_id	baseMean	log2FoldChange	lfcSE	stat	pvalue	padj	hgnc_symbol	tissue1	tissue2
ensembl_gene_id	baseMean	log2FoldChange	lfcSE	stat	pvalue	padj	hgnc_symbol	tissue1	tissue2
ensembl_gene_id	baseMean	log2FoldChange	lfcSE	stat	pvalue	padj	hgnc_symbol	tissue1	tissue2
ensembl_gene_id	baseMean	log2FoldChange	lfcSE	stat	pvalue	padj	hgnc_symbol	tissue1	tissue2
ensembl_gene_id	baseMean	log2FoldChange	lfcSE	stat	pvalue	padj	hgnc_symbol	tissue1	tissue2
ensembl_gene_id	baseMean	log2FoldChange	lfcSE	stat	pvalue	padj	hgnc_symbol	tissue1	tissue2
ensembl_gene_id	baseMean	log2FoldChange	lfcSE	stat	pvalue	padj	hgnc_symbol	tissue1	tissue2
ensembl_gene_id	baseMean	log2FoldChange	lfcSE	stat	pvalue	padj	hgnc_symbol	tissue1	tissue2
ensembl_gene_id	baseMean	log2FoldChange	lfcSE	stat	pvalue	padj	hgnc_symbol	tissue1	tissue2
ensembl_gene_id	baseMean	log2FoldChange	lfcSE	stat	pvalue	padj	hgnc_symbol	tissue1	tissue2
ensembl_gene_id	baseMean	log2FoldChange	lfcSE	stat	pvalue	padj	hgnc_symbol	tissue1	tissue2
ensembl_gene_id	baseMean	log2FoldChange	lfcSE	stat	pvalue	padj	hgnc_symbol	tissue1	tissue2
ensembl_gene_id	baseMean	log2FoldChange	lfcSE	stat	pvalue	padj	hgnc_symbol	tissue1	tissue2
ensembl_gene_id	baseMean	log2FoldChange	lfcSE	stat	pvalue	padj	hgnc_symbol	tissue1	tissue2
ensembl_gene_id	baseMean	log2FoldChange	lfcSE	stat	pvalue	padj	hgnc_symbol	tissue1	tissue2
ensembl_gene_id	baseMean	log2FoldChange	lfcSE	stat	pvalue	padj	hgnc_symbol	tissue1	tissue2
ensembl_gene_id	baseMean	log2FoldChange	lfcSE	stat	pvalue	padj	hgnc_symbol	tissue1	tissue2
ensembl_gene_id	baseMean	log2FoldChange	lfcSE	stat	pvalue	padj	hgnc_symbol	tissue1	tissue2
ensembl_gene_id	baseMean	log2FoldChange	lfcSE	stat	pvalue	padj	hgnc_symbol	tissue1	tissue2
ensembl_gene_id	baseMean	log2FoldChange	lfcSE	stat	pvalue	padj	hgnc_symbol	tissue1	tissue2
ensembl_gene_id	baseMean	log2FoldChange	lfcSE	stat	pvalue	padj	hgnc_symbol	tissue1	tissue2
ensembl_gene_id	baseMean	log2FoldChange	lfcSE	stat	pvalue	padj	hgnc_symbol	tissue1	tissue2
ensembl_gene_id	baseMean	log2FoldChange	lfcSE	stat	pvalue	padj	hgnc_symbol	tissue1	tissue2
ensembl_gene_id	baseMean	log2FoldChange	lfcSE	stat	pvalue	padj	hgnc_symbol	tissue1	tissue2
ensembl_gene_id	baseMean	log2FoldChange	lfcSE	stat	pvalue	padj	hgnc_symbol	tissue1	tissue2
ensembl_gene_id	baseMean	log2FoldChange	lfcSE	stat	pvalue	padj	hgnc_symbol	tissue1	tissue2
ensembl_gene_id	baseMean	log2FoldChange	lfcSE	stat	pvalue	padj	hgnc_symbol	tissue1	tissue2
ensembl_gene_id	baseMean	log2FoldChange	lfcSE	stat	pvalue	padj	hgnc_symbol	tissue1	tissue2
ensembl_gene_id	baseMean	log2FoldChange	lfcSE	stat	pvalue	padj	hgnc_symbol	tissue1	tissue2
ensembl_gene_id	baseMean	log2FoldChange	lfcSE	stat	pvalue	padj	hgnc_symbol	tissue1	tissue2
ensembl_gene_id	baseMean	log2FoldChange	lfcSE	stat	pvalue	padj	hgnc_symbol	tissue1	tissue2
ensembl_gene_id	baseMean	log2FoldChange	lfcSE	stat	pvalue	padj	hgnc_symbol	tissue1	tissue2
ensembl_gene_id	baseMean	log2FoldChange	lfcSE	stat	pvalue	padj	hgnc_symbol	tissue1	tissue2
ensembl_gene_id	baseMean	log2FoldChange	lfcSE	stat	pvalue	padj	hgnc_symbol	tissue1	tissue2
ensembl_gene_id	baseMean	log2FoldChange	lfcSE	stat	pvalue	padj	hgnc_symbol	tissue1	tissue2
ensembl_gene_id	baseMean	log2FoldChange	lfcSE	stat	pvalue	padj	hgnc_symbol	tissue1	tissue2
ensembl_gene_id	baseMean	log2FoldChange	lfcSE	stat	pvalue	padj	hgnc_symbol	tissue1	tissue2
ensembl_gene_id	baseMean	log2FoldChange	lfcSE	stat	pvalue	padj	hgnc_symbol	tissue1	tissue2
ensembl_gene_id	baseMean	log2FoldChange	lfcSE	stat	pvalue	padj	hgnc_symbol	tissue1	tissue2
ensembl_gene_id	baseMean	log2FoldChange	lfcSE	stat	pvalue	padj	hgnc_symbol	tissue1	tissue2
ensembl_gene_id	baseMean	log2FoldChange	lfcSE	stat	pvalue	padj	hgnc_symbol	tissue1	tissue2
ensembl_gene_id	baseMean	log2FoldChange	lfcSE	stat	pvalue	padj	hgnc_symbol	tissue1	tissue2
ensembl_gene_id	baseMean	log2FoldChange	lfcSE	stat	pvalue	padj	hgnc_symbol	tissue1	tissue2
ensembl_gene_id	baseMean	log2FoldChange	lfcSE	stat	pvalue	padj	hgnc_symbol	tissue1	tissue2
ensembl_gene_id	baseMean	log2FoldChange	lfcSE	stat	pvalue	padj	hgnc_symbol	tissue1	tissue2
ensembl_gene_id	baseMean	log2FoldChange	lfcSE	stat	pvalue	padj	hgnc_symbol	tissue1	tissue2
ensembl_gene_id	baseMean	log2FoldChange	lfcSE	stat	pvalue	padj	hgnc_symbol	tissue1	tissue2
ensembl_gene_id	baseMean	log2FoldChange	lfcSE	stat	pvalue	padj	hgnc_symbol	tissue1	tissue2
ensembl_gene_id	baseMean	log2FoldChange	lfcSE	stat	pvalue	padj	hgnc_symbol	tissue1	tissue2
ensembl_gene_id	baseMean	log2FoldChange	lfcSE	stat	pvalue	padj	hgnc_symbol	tissue1	tissue2
ensembl_gene_id	baseMean	log2FoldChange	lfcSE	stat	pvalue	padj	hgnc_symbol	tissue1	tissue2
ensembl_gene_id	baseMean	log2FoldChange	lfcSE	stat	pvalue	padj	hgnc_symbol	tissue1	tissue2
ensembl_gene_id	baseMean	log2FoldChange	lfcSE	stat	pvalue	padj	hgnc_symbol	tissue1	tissue2
ensembl_gene_id	baseMean	log2FoldChange	lfcSE	stat	pvalue	padj	hgnc_symbol	tissue1	tissue2
ensembl_gene_id	baseMean	log2FoldChange	lfcSE	stat	pvalue	padj	hgnc_symbol	tissue1	tissue2
ensembl_gene_id	baseMean	log2FoldChange	lfcSE	stat	pvalue	padj	hgnc_symbol	tissue1	tissue2
ensembl_gene_id	baseMean	log2FoldChange	lfcSE	stat	pvalue	padj	hgnc_symbol	tissue1	tissue2
ensembl_gene_id	baseMean	log2FoldChange	lfcSE	stat	pvalue	padj	hgnc_symbol	tissue1	tissue2
ensembl_gene_id	baseMean	log2FoldChange	lfcSE	stat	pvalue	padj	hgnc_symbol	tissue1	tissue2
ensembl_gene_id	baseMean	log2FoldChange	lfcSE	stat	pvalue	padj	hgnc_symbol	tissue1	tissue2
ensembl_gene_id	baseMean	log2FoldChange	lfcSE	stat	pvalue	padj	hgnc_symbol	tissue1	tissue2
ensembl_gene_id	baseMean	log2FoldChange	lfcSE	stat	pvalue	padj	hgnc_symbol	tissue1	tissue2
ensembl_gene_id	baseMean	log2FoldChange	lfcSE	stat	pvalue	padj	hgnc_symbol	tissue1	tissue2
ensembl_gene_id	baseMean	log2FoldChange	lfcSE	stat	pvalue	padj	hgnc_symbol	tissue1	tissue2
ensembl_gene_id	baseMean	log2FoldChange	lfcSE	stat	pvalue	padj	hgnc_symbol	tissue1	tissue2
ensembl_gene_id	baseMean	log2FoldChange	lfcSE	stat	pvalue	padj	hgnc_symbol	tissue1	tissue2
ensembl_gene_id	baseMean	log2FoldChange	lfcSE	stat	pvalue	padj	hgnc_symbol	tissue1	tissue2
ensembl_gene_id	baseMean	log2FoldChange	lfcSE	stat	pvalue	padj	hgnc_symbol	tissue1	tissue2
ensembl_gene_id	baseMean	log2FoldChange	lfcSE	stat	pvalue	padj	hgnc_symbol	tissue1	tissue2
ensembl_gene_id	baseMean	log2FoldChange	lfcSE	stat	pvalue	padj	hgnc_symbol	tissue1	tissue2
ensembl_gene_id	baseMean	log2FoldChange	lfcSE	stat	pvalue	padj	hgnc_symbol	tissue1	tissue2
ensembl_gene_id	baseMean	log2FoldChange	lfcSE	stat	pvalue	padj	hgnc_symbol	tissue1	tissue2
ensembl_gene_id	baseMean	log2FoldChange	lfcSE	stat	pvalue	padj	hgnc_symbol	tissue1	tissue2
ensembl_gene_id	baseMean	log2FoldChange	lfcSE	stat	pvalue	padj	hgnc_symbol	tissue1	tissue2
ensembl_gene_id	baseMean	log2FoldChange	lfcSE	stat	pvalue	padj	hgnc_symbol	tissue1	tissue2
ensembl_gene_id	baseMean	log2FoldChange	lfcSE	stat	pvalue	padj	hgnc_symbol	tissue1	tissue2
ensembl_gene_id	baseMean	log2FoldChange	lfcSE	stat	pvalue	padj	hgnc_symbol	tissue1	tissue2
ensembl_gene_id	baseMean	log2FoldChange	lfcSE	stat	pvalue	padj	hgnc_symbol	tissue1	tissue2
ensembl_gene_id	baseMean	log2FoldChange	lfcSE	stat	pvalue	padj	hgnc_symbol	tissue1	tissue2
ensembl_gene_id	baseMean	log2FoldChange	lfcSE	stat	pvalue	padj	hgnc_symbol	tissue1	tissue2
ensembl_gene_id	baseMean	log2FoldChange	lfcSE	stat	pvalue	padj	hgnc_symbol	tissue1	tissue2
ensembl_gene_id	baseMean	log2FoldChange	lfcSE	stat	pvalue	padj	hgnc_symbol	tissue1	tissue2
ensembl_gene_id	baseMean	log2FoldChange	lfcSE	stat	pvalue	padj	hgnc_symbol	tissue1	tissue2
ensembl_gene_id	baseMean	log2FoldChange	lfcSE	stat	pvalue	padj	hgnc_symbol	tissue1	tissue2
ensembl_gene_id	baseMean	log2FoldChange	lfcSE	stat	pvalue	padj	hgnc_symbol	tissue1	tissue2
ensembl_gene_id	baseMean	log2FoldChange	lfcSE	stat	pvalue	padj	hgnc_symbol	tissue1	tissue2
ensembl_gene_id	baseMean	log2FoldChange	lfcSE	stat	pvalue	padj	hgnc_symbol	tissue1	tissue2
ensembl_gene_id	baseMean	log2FoldChange	lfcSE	stat	pvalue	padj	hgnc_symbol	tissue1	tissue2
ensembl_gene_id	baseMean	log2FoldChange	lfcSE	stat	pvalue	padj	hgnc_symbol	tissue1	tissue2
ensembl_gene_id	baseMean	log2FoldChange	lfcSE	stat	pvalue	padj	hgnc_symbol	tissue1	tissue2
ensembl_gene_id	baseMean	log2FoldChange	lfcSE	stat	pvalue	padj	hgnc_symbol	tissue1	tissue2
ensembl_gene_id	baseMean	log2FoldChange	lfcSE	stat	pvalue	padj	hgnc_symbol	tissue1	tissue2
ensembl_gene_id	baseMean	log2FoldChange	lfcSE	stat	pvalue	padj	hgnc_symbol	tissue1	tissue2
ensembl_gene_id	baseMean	log2FoldChange	lfcSE	stat	pvalue	padj	hgnc_symbol	tissue1	tissue2
ensembl_gene_id	baseMean	log2FoldChange	lfcSE	stat	pvalue	padj	hgnc_symbol	tissue1	tissue2
ensembl_gene_id	baseMean	log2FoldChange	lfcSE	stat	pvalue	padj	hgnc_symbol	tissue1	tissue2
ensembl_gene_id	baseMean	log2FoldChange	lfcSE	stat	pvalue	padj	hgnc_symbol	tissue1	tissue2
ensembl_gene_id	baseMean	log2FoldChange	lfcSE	stat	pvalue	padj	hgnc_symbol	tissue1	tissue2
ensembl_gene_id	baseMean	log2FoldChange	lfcSE	stat	pvalue	padj	hgnc_symbol	tissue1	tissue2
ensembl_gene_id	baseMean	log2FoldChange	lfcSE	stat	pvalue	padj	hgnc_symbol	tissue1	tissue2
ensembl_gene_id	baseMean	log2FoldChange	lfcSE	stat	pvalue	padj	hgnc_symbol	tissue1	tissue2
ensembl_gene_id	baseMean	log2FoldChange	lfcSE	stat	pvalue	padj	hgnc_symbol	tissue1	tissue2
ensembl_gene_id	baseMean	log2FoldChange	lfcSE	stat	pvalue	padj	hgnc_symbol	tissue1	tissue2
ensembl_gene_id	baseMean	log2FoldChange	lfcSE	stat	pvalue	padj	hgnc_symbol	tissue1	tissue2
ensembl_gene_id	baseMean	log2FoldChange	lfcSE	stat	pvalue	padj	hgnc_symbol	tissue1	tissue2
ensembl_gene_id	baseMean	log2FoldChange	lfcSE	stat	pvalue	padj	hgnc_symbol	tissue1	tissue2
ensembl_gene_id	baseMean	log2FoldChange	lfcSE	stat	pvalue	padj	hgnc_symbol	tissue1	tissue2
ensembl_gene_id	baseMean	log2FoldChange	lfcSE	stat	pvalue	padj	hgnc_symbol	tissue1	tissue2
ensembl_gene_id	baseMean	log2FoldChange	lfcSE	stat	pvalue	padj	hgnc_symbol	tissue1	tissue2
ensembl_gene_id	baseMean	log2FoldChange	lfcSE	stat	pvalue	padj	hgnc_symbol	tissue1	tissue2
ensembl_gene_id	baseMean	log2FoldChange	lfcSE	stat	pvalue	padj	hgnc_symbol	tissue1	tissue2
ensembl_gene_id	baseMean	log2FoldChange	lfcSE	stat	pvalue	padj	hgnc_symbol	tissue1	tissue2
ensembl_gene_id	baseMean	log2FoldChange	lfcSE	stat	pvalue	padj	hgnc_symbol	tissue1	tissue2
ensembl_gene_id	baseMean	log2FoldChange	lfcSE	stat	pvalue	padj	hgnc_symbol	tissue1	tissue2
ensembl_gene_id	baseMean	log2FoldChange	lfcSE	stat	pvalue	padj	hgnc_symbol	tissue1	tissue2
ensembl_gene_id	baseMean	log2FoldChange	lfcSE	stat	pvalue	padj	hgnc_symbol	tissue1	tissue2
ensembl_gene_id	baseMean	log2FoldChange	lfcSE	stat	pvalue	padj	hgnc_symbol	tissue1	tissue2
ensembl_gene_id	baseMean	log2FoldChange	lfcSE	stat	pvalue	padj	hgnc_symbol	tissue1	tissue2
ensembl_gene_id	baseMean	log2FoldChange	lfcSE	stat	pvalue	padj	hgnc_symbol	tissue1	tissue2
ensembl_gene_id	baseMean	log2FoldChange	lfcSE	stat	pvalue	padj	hgnc_symbol	tissue1	tissue2
ensembl_gene_id	baseMean	log2FoldChange	lfcSE	stat	pvalue	padj	hgnc_symbol	tissue1	tissue2
ensembl_gene_id	baseMean	log2FoldChange	lfcSE	stat	pvalue	padj	hgnc_symbol	tissue1	tissue2
ensembl_gene_id	baseMean	log2FoldChange	lfcSE	stat	pvalue	padj	hgnc_symbol	tissue1	tissue2
ensembl_gene_id	baseMean	log2FoldChange	lfcSE	stat	pvalue	padj	hgnc_symbol	tissue1	tissue2
ensembl_gene_id	baseMean	log2FoldChange	lfcSE	stat	pvalue	padj	hgnc_symbol	tissue1	tissue2
ensembl_gene_id	baseMean	log2FoldChange	lfcSE	stat	pvalue	padj	hgnc_symbol	tissue1	tissue2
ensembl_gene_id	baseMean	log2FoldChange	lfcSE	stat	pvalue	padj	hgnc_symbol	tissue1	tissue2
ensembl_gene_id	baseMean	log2FoldChange	lfcSE	stat	pvalue	padj	hgnc_symbol	tissue1	tissue2
ensembl_gene_id	baseMean	log2FoldChange	lfcSE	stat	pvalue	padj	hgnc_symbol	tissue1	tissue2
ensembl_gene_id	baseMean	log2FoldChange	lfcSE	stat	pvalue	padj	hgnc_symbol	tissue1	tissue2
ensembl_gene_id	baseMean	log2FoldChange	lfcSE	stat	pvalue	padj	hgnc_symbol	tissue1	tissue2
ensembl_gene_id	baseMean	log2FoldChange	lfcSE	stat	pvalue	padj	hgnc_symbol	tissue1	tissue2
ensembl_gene_id	baseMean	log2FoldChange	lfcSE	stat	pvalue	padj	hgnc_symbol	tissue1	tissue2
ensembl_gene_id	baseMean	log2FoldChange	lfcSE	stat	pvalue	padj	hgnc_symbol	tissue1	tissue2
ensembl_gene_id	baseMean	log2FoldChange	lfcSE	stat	pvalue	padj	hgnc_symbol	tissue1	tissue2
ensembl_gene_id	baseMean	log2FoldChange	lfcSE	stat	pvalue	padj	hgnc_symbol	tissue1	tissue2
ensembl_gene_id	baseMean	log2FoldChange	lfcSE	stat	pvalue	padj	hgnc_symbol	tissue1	tissue2
ensembl_gene_id	baseMean	log2FoldChange	lfcSE	stat	pvalue	padj	hgnc_symbol	tissue1	tissue2
ensembl_gene_id	baseMean	log2FoldChange	lfcSE	stat	pvalue	padj	hgnc_symbol	tissue1	tissue2
ensembl_gene_id	baseMean	log2FoldChange	lfcSE	stat	pvalue	padj	hgnc_symbol	tissue1	tissue2
ensembl_gene_id	baseMean	log2FoldChange	lfcSE	stat	pvalue	padj	hgnc_symbol	tissue1	tissue2
ensembl_gene_id	baseMean	log2FoldChange	lfcSE	stat	pvalue	padj	hgnc_symbol	tissue1	tissue2
ensembl_gene_id	baseMean	log2FoldChange	lfcSE	stat	pvalue	padj	hgnc_symbol	tissue1	tissue2
ensembl_gene_id	baseMean	log2FoldChange	lfcSE	stat	pvalue	padj	hgnc_symbol	tissue1	tissue2
ensembl_gene_id	baseMean	log2FoldChange	lfcSE	stat	pvalue	padj	hgnc_symbol	tissue1	tissue2
ensembl_gene_id	baseMean	log2FoldChange	lfcSE	stat	pvalue	padj	hgnc_symbol	tissue1	tissue2
ensembl_gene_id	baseMean	log2FoldChange	lfcSE	stat	pvalue	padj	hgnc_symbol	tissue1	tissue2
ensembl_gene_id	baseMean	log2FoldChange	lfcSE	stat	pvalue	padj	hgnc_symbol	tissue1	tissue2
ensembl_gene_id	baseMean	log2FoldChange	lfcSE	stat	pvalue	padj	hgnc_symbol	tissue1	tissue2
ensembl_gene_id	baseMean	log2FoldChange	lfcSE	stat	pvalue	padj	hgnc_symbol	tissue1	tissue2
ensembl_gene_id	baseMean	log2FoldChange	lfcSE	stat	pvalue	padj	hgnc_symbol	tissue1	tissue2
ensembl_gene_id	baseMean	log2FoldChange	lfcSE	stat	pvalue	padj	hgnc_symbol	tissue1	tissue2
ensembl_gene_id	baseMean	log2FoldChange	lfcSE	stat	pvalue	padj	hgnc_symbol	tissue1	tissue2
ensembl_gene_id	baseMean	log2FoldChange	lfcSE	stat	pvalue	padj	hgnc_symbol	tissue1	tissue2
ensembl_gene_id	baseMean	log2FoldChange	lfcSE	stat	pvalue	padj	hgnc_symbol	tissue1	tissue2
ensembl_gene_id	baseMean	log2FoldChange	lfcSE	stat	pvalue	padj	hgnc_symbol	tissue1	tissue2
ensembl_gene_id	baseMean	log2FoldChange	lfcSE	stat	pvalue	padj	hgnc_symbol	tissue1	tissue2
ensembl_gene_id	baseMean	log2FoldChange	lfcSE	stat	pvalue	padj	hgnc_symbol	tissue1	tissue2
ensembl_gene_id	baseMean	log2FoldChange	lfcSE	stat	pvalue	padj	hgnc_symbol	tissue1	tissue2
ensembl_gene_id	baseMean	log2FoldChange	lfcSE	stat	pvalue	padj	hgnc_symbol	tissue1	tissue2
ensembl_gene_id	baseMean	log2FoldChange	lfcSE	stat	pvalue	padj	hgnc_symbol	tissue1	tissue2
ensembl_gene_id	baseMean	log2FoldChange	lfcSE	stat	pvalue	padj	hgnc_symbol	tissue1	tissue2
ensembl_gene_id	baseMean	log2FoldChange	lfcSE	stat	pvalue	padj	hgnc_symbol	tissue1	tissue2
ensembl_gene_id	baseMean	log2FoldChange	lfcSE	stat	pvalue	padj	hgnc_symbol	tissue1	tissue2
ensembl_gene_id	baseMean	log2FoldChange	lfcSE	stat	pvalue	padj	hgnc_symbol	tissue1	tissue2
ensembl_gene_id	baseMean	log2FoldChange	lfcSE	stat	pvalue	padj	hgnc_symbol	tissue1	tissue2
ensembl_gene_id	baseMean	log2FoldChange	lfcSE	stat	pvalue	padj	hgnc_symbol	tissue1	tissue2
ensembl_gene_id	baseMean	log2FoldChange	lfcSE	stat	pvalue	padj	hgnc_symbol	tissue1	tissue2
ensembl_gene_id	baseMean	log2FoldChange	lfcSE	stat	pvalue	padj	hgnc_symbol	tissue1	tissue2
ensembl_gene_id	baseMean	log2FoldChange	lfcSE	stat	pvalue	padj	hgnc_symbol	tissue1	tissue2
ensembl_gene_id	baseMean	log2FoldChange	lfcSE	stat	pvalue	padj	hgnc_symbol	tissue1	tissue2
ensembl_gene_id	baseMean	log2FoldChange	lfcSE	stat	pvalue	padj	hgnc_symbol	tissue1	tissue2
ensembl_gene_id	baseMean	log2FoldChange	lfcSE	stat	pvalue	padj	hgnc_symbol	tissue1	tissue2
ensembl_gene_id	baseMean	log2FoldChange	lfcSE	stat	pvalue	padj	hgnc_symbol	tissue1	tissue2
ensembl_gene_id	baseMean	log2FoldChange	lfcSE	stat	pvalue	padj	hgnc_symbol	tissue1	tissue2
ensembl_gene_id	baseMean	log2FoldChange	lfcSE	stat	pvalue	padj	hgnc_symbol	tissue1	tissue2
ensembl_gene_id	baseMean	log2FoldChange	lfcSE	stat	pvalue	padj	hgnc_symbol	tissue1	tissue2
ensembl_gene_id	baseMean	log2FoldChange	lfcSE	stat	pvalue	padj	hgnc_symbol	tissue1	tissue2
ensembl_gene_id	baseMean	log2FoldChange	lfcSE	stat	pvalue	padj	hgnc_symbol	tissue1	tissue2
ensembl_gene_id	baseMean	log2FoldChange	lfcSE	stat	pvalue	padj	hgnc_symbol	tissue1	tissue2
ensembl_gene_id	baseMean	log2FoldChange	lfcSE	stat	pvalue	padj	hgnc_symbol	tissue1	tissue2
ensembl_gene_id	baseMean	log2FoldChange	lfcSE	stat	pvalue	padj	hgnc_symbol	tissue1	tissue2
ensembl_gene_id	baseMean	log2FoldChange	lfcSE	stat	pvalue	padj	hgnc_symbol	tissue1	tissue2
ensembl_gene_id	baseMean	log2FoldChange	lfcSE	stat	pvalue	padj	hgnc_symbol	tissue1	tissue2
ensembl_gene_id	baseMean	log2FoldChange	lfcSE	stat	pvalue	padj	hgnc_symbol	tissue1	tissue2
ensembl_gene_id	baseMean	log2FoldChange	lfcSE	stat	pvalue	padj	hgnc_symbol	tissue1	tissue2
ensembl_gene_id	baseMean	log2FoldChange	lfcSE	stat	pvalue	padj	hgnc_symbol	tissue1	tissue2
ensembl_gene_id	baseMean	log2FoldChange	lfcSE	stat	pvalue	padj	hgnc_symbol	tissue1	tissue2
ensembl_gene_id	baseMean	log2FoldChange	lfcSE	stat	pvalue	padj	hgnc_symbol	tissue1	tissue2
ensembl_gene_id	baseMean	log2FoldChange	lfcSE	stat	pvalue	padj	hgnc_symbol	tissue1	tissue2
ensembl_gene_id	baseMean	log2FoldChange	lfcSE	stat	pvalue	padj	hgnc_symbol	tissue1	tissue2
ensembl_gene_id	baseMean	log2FoldChange	lfcSE	stat	pvalue	padj	hgnc_symbol	tissue1	tissue2
ensembl_gene_id	baseMean	log2FoldChange	lfcSE	stat	pvalue	padj	hgnc_symbol	tissue1	tissue2
ensembl_gene_id	baseMean	log2FoldChange	lfcSE	stat	pvalue	padj	hgnc_symbol	tissue1	tissue2
ensembl_gene_id	baseMean	log2FoldChange	lfcSE	stat	pvalue	padj	hgnc_symbol	tissue1	tissue2
ensembl_gene_id	baseMean	log2FoldChange	lfcSE	stat	pvalue	padj	hgnc_symbol	tissue1	tissue2
ensembl_gene_id	baseMean	log2FoldChange	lfcSE	stat	pvalue	padj	hgnc_symbol	tissue1	tissue2
ensembl_gene_id	baseMean	log2FoldChange	lfcSE	stat	pvalue	padj	hgnc_symbol	tissue1	tissue2
ensembl_gene_id	baseMean	log2FoldChange	lfcSE	stat	pvalue	padj	hgnc_symbol	tissue1	tissue2
ensembl_gene_id	baseMean	log2FoldChange	lfcSE	stat	pvalue	padj	hgnc_symbol	tissue1	tissue2
ensembl_gene_id	baseMean	log2FoldChange	lfcSE	stat	pvalue	padj	hgnc_symbol	tissue1	tissue2
ensembl_gene_id	baseMean	log2FoldChange	lfcSE	stat	pvalue	padj	hgnc_symbol	tissue1	tissue2
ensembl_gene_id	baseMean	log2FoldChange	lfcSE	stat	pvalue	padj	hgnc_symbol	tissue1	tissue2
ensembl_gene_id	baseMean	log2FoldChange	lfcSE	stat	pvalue	padj	hgnc_symbol	tissue1	tissue2
ensembl_gene_id	baseMean	log2FoldChange	lfcSE	stat	pvalue	padj	hgnc_symbol	tissue1	tissue2
ensembl_gene_id	baseMean	log2FoldChange	lfcSE	stat	pvalue	padj	hgnc_symbol	tissue1	tissue2
ensembl_gene_id	baseMean	log2FoldChange	lfcSE	stat	pvalue	padj	hgnc_symbol	tissue1	tissue2
ensembl_gene_id	baseMean	log2FoldChange	lfcSE	stat	pvalue	padj	hgnc_symbol	tissue1	tissue2
ensembl_gene_id	baseMean	log2FoldChange	lfcSE	stat	pvalue	padj	hgnc_symbol	tissue1	tissue2
ensembl_gene_id	baseMean	log2FoldChange	lfcSE	stat	pvalue	padj	hgnc_symbol	tissue1	tissue2
ensembl_gene_id	baseMean	log2FoldChange	lfcSE	stat	pvalue	padj	hgnc_symbol	tissue1	tissue2
ensembl_gene_id	baseMean	log2FoldChange	lfcSE	stat	pvalue	padj	hgnc_symbol	tissue1	tissue2
ensembl_gene_id	baseMean	log2FoldChange	lfcSE	stat	pvalue	padj	hgnc_symbol	tissue1	tissue2
ensembl_gene_id	baseMean	log2FoldChange	lfcSE	stat	pvalue	padj	hgnc_symbol	tissue1	tissue2
ensembl_gene_id	baseMean	log2FoldChange	lfcSE	stat	pvalue	padj	hgnc_symbol	tissue1	tissue2
ensembl_gene_id	baseMean	log2FoldChange	lfcSE	stat	pvalue	padj	hgnc_symbol	tissue1	tissue2
ensembl_gene_id	baseMean	log2FoldChange	lfcSE	stat	pvalue	padj	hgnc_symbol	tissue1	tissue2
ensembl_gene_id	baseMean	log2FoldChange	lfcSE	stat	pvalue	padj	hgnc_symbol	tissue1	tissue2
ensembl_gene_id	baseMean	log2FoldChange	lfcSE	stat	pvalue	padj	hgnc_symbol	tissue1	tissue2
ensembl_gene_id	baseMean	log2FoldChange	lfcSE	stat	pvalue	padj	hgnc_symbol	tissue1	tissue2
ensembl_gene_id	baseMean	log2FoldChange	lfcSE	stat	pvalue	padj	hgnc_symbol	tissue1	tissue2
ensembl_gene_id	baseMean	log2FoldChange	lfcSE	stat	pvalue	padj	hgnc_symbol	tissue1	tissue2
ensembl_gene_id	baseMean	log2FoldChange	lfcSE	stat	pvalue	padj	hgnc_symbol	tissue1	tissue2
ensembl_gene_id	baseMean	log2FoldChange	lfcSE	stat	pvalue	padj	hgnc_symbol	tissue1	tissue2
ensembl_gene_id	baseMean	log2FoldChange	lfcSE	stat	pvalue	padj	hgnc_symbol	tissue1	tissue2
ensembl_gene_id	baseMean	log2FoldChange	lfcSE	stat	pvalue	padj	hgnc_symbol	tissue1	tissue2
ensembl_gene_id	baseMean	log2FoldChange	lfcSE	stat	pvalue	padj	hgnc_symbol	tissue1	tissue2
ensembl_gene_id	baseMean	log2FoldChange	lfcSE	stat	pvalue	padj	hgnc_symbol	tissue1	tissue2
ensembl_gene_id	baseMean	log2FoldChange	lfcSE	stat	pvalue	padj	hgnc_symbol	tissue1	tissue2
ensembl_gene_id	baseMean	log2FoldChange	lfcSE	stat	pvalue	padj	hgnc_symbol	tissue1	tissue2
ensembl_gene_id	baseMean	log2FoldChange	lfcSE	stat	pvalue	padj	hgnc_symbol	tissue1	tissue2
ensembl_gene_id	baseMean	log2FoldChange	lfcSE	stat	pvalue	padj	hgnc_symbol	tissue1	tissue2
ensembl_gene_id	baseMean	log2FoldChange	lfcSE	stat	pvalue	padj	hgnc_symbol	tissue1	tissue2
ensembl_gene_id	baseMean	log2FoldChange	lfcSE	stat	pvalue	padj	hgnc_symbol	tissue1	tissue2
ensembl_gene_id	baseMean	log2FoldChange	lfcSE	stat	pvalue	padj	hgnc_symbol	tissue1	tissue2
ensembl_gene_id	baseMean	log2FoldChange	lfcSE	stat	pvalue	padj	hgnc_symbol	tissue1	tissue2
ensembl_gene_id	baseMean	log2FoldChange	lfcSE	stat	pvalue	padj	hgnc_symbol	tissue1	tissue2
ensembl_gene_id	baseMean	log2FoldChange	lfcSE	stat	pvalue	padj	hgnc_symbol	tissue1	tissue2
ensembl_gene_id	baseMean	log2FoldChange	lfcSE	stat	pvalue	padj	hgnc_symbol	tissue1	tissue2
ensembl_gene_id	baseMean	log2FoldChange	lfcSE	stat	pvalue	padj	hgnc_symbol	tissue1	tissue2
ensembl_gene_id	baseMean	log2FoldChange	lfcSE	stat	pvalue	padj	hgnc_symbol	tissue1	tissue2
ensembl_gene_id	baseMean	log2FoldChange	lfcSE	stat	pvalue	padj	hgnc_symbol	tissue1	tissue2
ensembl_gene_id	baseMean	log2FoldChange	lfcSE	stat	pvalue	padj	hgnc_symbol	tissue1	tissue2
ensembl_gene_id	baseMean	log2FoldChange	lfcSE	stat	pvalue	padj	hgnc_symbol	tissue1	tissue2
ensembl_gene_id	baseMean	log2FoldChange	lfcSE	stat	pvalue	padj	hgnc_symbol	tissue1	tissue2
ensembl_gene_id	baseMean	log2FoldChange	lfcSE	stat	pvalue	padj	hgnc_symbol	tissue1	tissue2
ensembl_gene_id	baseMean	log2FoldChange	lfcSE	stat	pvalue	padj	hgnc_symbol	tissue1	tissue2
ensembl_gene_id	baseMean	log2FoldChange	lfcSE	stat	pvalue	padj	hgnc_symbol	tissue1	tissue2
ensembl_gene_id	baseMean	log2FoldChange	lfcSE	stat	pvalue	padj	hgnc_symbol	tissue1	tissue2
ensembl_gene_id	baseMean	log2FoldChange	lfcSE	stat	pvalue	padj	hgnc_symbol	tissue1	tissue2
ensembl_gene_id	baseMean	log2FoldChange	lfcSE	stat	pvalue	padj	hgnc_symbol	tissue1	tissue2
ensembl_gene_id	baseMean	log2FoldChange	lfcSE	stat	pvalue	padj	hgnc_symbol	tissue1	tissue2
ensembl_gene_id	baseMean	log2FoldChange	lfcSE	stat	pvalue	padj	hgnc_symbol	tissue1	tissue2
ensembl_gene_id	baseMean	log2FoldChange	lfcSE	stat	pvalue	padj	hgnc_symbol	tissue1	tissue2
ensembl_gene_id	baseMean	log2FoldChange	lfcSE	stat	pvalue	padj	hgnc_symbol	tissue1	tissue2
ensembl_gene_id	baseMean	log2FoldChange	lfcSE	stat	pvalue	padj	hgnc_symbol	tissue1	tissue2
ensembl_gene_id	baseMean	log2FoldChange	lfcSE	stat	pvalue	padj	hgnc_symbol	tissue1	tissue2
ensembl_gene_id	baseMean	log2FoldChange	lfcSE	stat	pvalue	padj	hgnc_symbol	tissue1	tissue2
ensembl_gene_id	baseMean	log2FoldChange	lfcSE	stat	pvalue	padj	hgnc_symbol	tissue1	tissue2
ensembl_gene_id	baseMean	log2FoldChange	lfcSE	stat	pvalue	padj	hgnc_symbol	tissue1	tissue2
ensembl_gene_id	baseMean	log2FoldChange	lfcSE	stat	pvalue	padj	hgnc_symbol	tissue1	tissue2
ensembl_gene_id	baseMean	log2FoldChange	lfcSE	stat	pvalue	padj	hgnc_symbol	tissue1	tissue2
ensembl_gene_id	baseMean	log2FoldChange	lfcSE	stat	pvalue	padj	hgnc_symbol	tissue1	tissue2
ensembl_gene_id	baseMean	log2FoldChange	lfcSE	stat	pvalue	padj	hgnc_symbol	tissue1	tissue2
ensembl_gene_id	baseMean	log2FoldChange	lfcSE	stat	pvalue	padj	hgnc_symbol	tissue1	tissue2
ensembl_gene_id	baseMean	log2FoldChange	lfcSE	stat	pvalue	padj	hgnc_symbol	tissue1	tissue2
ensembl_gene_id	baseMean	log2FoldChange	lfcSE	stat	pvalue	padj	hgnc_symbol	tissue1	tissue2
ensembl_gene_id	baseMean	log2FoldChange	lfcSE	stat	pvalue	padj	hgnc_symbol	tissue1	tissue2
ensembl_gene_id	baseMean	log2FoldChange	lfcSE	stat	pvalue	padj	hgnc_symbol	tissue1	tissue2
ensembl_gene_id	baseMean	log2FoldChange	lfcSE	stat	pvalue	padj	hgnc_symbol	tissue1	tissue2
ensembl_gene_id	baseMean	log2FoldChange	lfcSE	stat	pvalue	padj	hgnc_symbol	tissue1	tissue2
ensembl_gene_id	baseMean	log2FoldChange	lfcSE	stat	pvalue	padj	hgnc_symbol	tissue1	tissue2
ensembl_gene_id	baseMean	log2FoldChange	lfcSE	stat	pvalue	padj	hgnc_symbol	tissue1	tissue2
ensembl_gene_id	baseMean	log2FoldChange	lfcSE	stat	pvalue	padj	hgnc_symbol	tissue1	tissue2
ensembl_gene_id	baseMean	log2FoldChange	lfcSE	stat	pvalue	padj	hgnc_symbol	tissue1	tissue2
ensembl_gene_id	baseMean	log2FoldChange	lfcSE	stat	pvalue	padj	hgnc_symbol	tissue1	tissue2
ensembl_gene_id	baseMean	log2FoldChange	lfcSE	stat	pvalue	padj	hgnc_symbol	tissue1	tissue2
ensembl_gene_id	baseMean	log2FoldChange	lfcSE	stat	pvalue	padj	hgnc_symbol	tissue1	tissue2
ensembl_gene_id	baseMean	log2FoldChange	lfcSE	stat	pvalue	padj	hgnc_symbol	tissue1	tissue2
ensembl_gene_id	baseMean	log2FoldChange	lfcSE	stat	pvalue	padj	hgnc_symbol	tissue1	tissue2
ensembl_gene_id	baseMean	log2FoldChange	lfcSE	stat	pvalue	padj	hgnc_symbol	tissue1	tissue2
ensembl_gene_id	baseMean	log2FoldChange	lfcSE	stat	pvalue	padj	hgnc_symbol	tissue1	tissue2
ensembl_gene_id	baseMean	log2FoldChange	lfcSE	stat	pvalue	padj	hgnc_symbol	tissue1	tissue2
ensembl_gene_id	baseMean	log2FoldChange	lfcSE	stat	pvalue	padj	hgnc_symbol	tissue1	tissue2
ensembl_gene_id	baseMean	log2FoldChange	lfcSE	stat	pvalue	padj	hgnc_symbol	tissue1	tissue2
ensembl_gene_id	baseMean	log2FoldChange	lfcSE	stat	pvalue	padj	hgnc_symbol	tissue1	tissue2
ensembl_gene_id	baseMean	log2FoldChange	lfcSE	stat	pvalue	padj	hgnc_symbol	tissue1	tissue2
ensembl_gene_id	baseMean	log2FoldChange	lfcSE	stat	pvalue	padj	hgnc_symbol	tissue1	tissue2
ensembl_gene_id	baseMean	log2FoldChange	lfcSE	stat	pvalue	padj	hgnc_symbol	tissue1	tissue2
ensembl_gene_id	baseMean	log2FoldChange	lfcSE	stat	pvalue	padj	hgnc_symbol	tissue1	tissue2
ensembl_gene_id	baseMean	log2FoldChange	lfcSE	stat	pvalue	padj	hgnc_symbol	tissue1	tissue2
ensembl_gene_id	baseMean	log2FoldChange	lfcSE	stat	pvalue	padj	hgnc_symbol	tissue1	tissue2
ensembl_gene_id	baseMean	log2FoldChange	lfcSE	stat	pvalue	padj	hgnc_symbol	tissue1	tissue2
ensembl_gene_id	baseMean	log2FoldChange	lfcSE	stat	pvalue	padj	hgnc_symbol	tissue1	tissue2
ensembl_gene_id	baseMean	log2FoldChange	lfcSE	stat	pvalue	padj	hgnc_symbol	tissue1	tissue2
ensembl_gene_id	baseMean	log2FoldChange	lfcSE	stat	pvalue	padj	hgnc_symbol	tissue1	tissue2
ensembl_gene_id	baseMean	log2FoldChange	lfcSE	stat	pvalue	padj	hgnc_symbol	tissue1	tissue2
ensembl_gene_id	baseMean	log2FoldChange	lfcSE	stat	pvalue	padj	hgnc_symbol	tissue1	tissue2
ensembl_gene_id	baseMean	log2FoldChange	lfcSE	stat	pvalue	padj	hgnc_symbol	tissue1	tissue2
ensembl_gene_id	baseMean	log2FoldChange	lfcSE	stat	pvalue	padj	hgnc_symbol	tissue1	tissue2
ensembl_gene_id	baseMean	log2FoldChange	lfcSE	stat	pvalue	padj	hgnc_symbol	tissue1	tissue2
ensembl_gene_id	baseMean	log2FoldChange	lfcSE	stat	pvalue	padj	hgnc_symbol	tissue1	tissue2
ensembl_gene_id	baseMean	log2FoldChange	lfcSE	stat	pvalue	padj	hgnc_symbol	tissue1	tissue2
ensembl_gene_id	baseMean	log2FoldChange	lfcSE	stat	pvalue	padj	hgnc_symbol	tissue1	tissue2
ensembl_gene_id	baseMean	log2FoldChange	lfcSE	stat	pvalue	padj	hgnc_symbol	tissue1	tissue2
ensembl_gene_id	baseMean	log2FoldChange	lfcSE	stat	pvalue	padj	hgnc_symbol	tissue1	tissue2
ensembl_gene_id	baseMean	log2FoldChange	lfcSE	stat	pvalue	padj	hgnc_symbol	tissue1	tissue2
ensembl_gene_id	baseMean	log2FoldChange	lfcSE	stat	pvalue	padj	hgnc_symbol	tissue1	tissue2
ensembl_gene_id	baseMean	log2FoldChange	lfcSE	stat	pvalue	padj	hgnc_symbol	tissue1	tissue2
ensembl_gene_id	baseMean	log2FoldChange	lfcSE	stat	pvalue	padj	hgnc_symbol	tissue1	tissue2
ensembl_gene_id	baseMean	log2FoldChange	lfcSE	stat	pvalue	padj	hgnc_symbol	tissue1	tissue2
ensembl_gene_id	baseMean	log2FoldChange	lfcSE	stat	pvalue	padj	hgnc_symbol	tissue1	tissue2
ensembl_gene_id	baseMean	log2FoldChange	lfcSE	stat	pvalue	padj	hgnc_symbol	tissue1	tissue2
ensembl_gene_id	baseMean	log2FoldChange	lfcSE	stat	pvalue	padj	hgnc_symbol	tissue1	tissue2
ensembl_gene_id	baseMean	log2FoldChange	lfcSE	stat	pvalue	padj	hgnc_symbol	tissue1	tissue2
ensembl_gene_id	baseMean	log2FoldChange	lfcSE	stat	pvalue	padj	hgnc_symbol	tissue1	tissue2
ensembl_gene_id	baseMean	log2FoldChange	lfcSE	stat	pvalue	padj	hgnc_symbol	tissue1	tissue2
ensembl_gene_id	baseMean	log2FoldChange	lfcSE	stat	pvalue	padj	hgnc_symbol	tissue1	tissue2
ensembl_gene_id	baseMean	log2FoldChange	lfcSE	stat	pvalue	padj	hgnc_symbol	tissue1	tissue2
ensembl_gene_id	baseMean	log2FoldChange	lfcSE	stat	pvalue	padj	hgnc_symbol	tissue1	tissue2
ensembl_gene_id	baseMean	log2FoldChange	lfcSE	stat	pvalue	padj	hgnc_symbol	tissue1	tissue2
ensembl_gene_id	baseMean	log2FoldChange	lfcSE	stat	pvalue	padj	hgnc_symbol	tissue1	tissue2
ensembl_gene_id	baseMean	log2FoldChange	lfcSE	stat	pvalue	padj	hgnc_symbol	tissue1	tissue2
ensembl_gene_id	baseMean	log2FoldChange	lfcSE	stat	pvalue	padj	hgnc_symbol	tissue1	tissue2
ensembl_gene_id	baseMean	log2FoldChange	lfcSE	stat	pvalue	padj	hgnc_symbol	tissue1	tissue2
ensembl_gene_id	baseMean	log2FoldChange	lfcSE	stat	pvalue	padj	hgnc_symbol	tissue1	tissue2
ensembl_gene_id	baseMean	log2FoldChange	lfcSE	stat	pvalue	padj	hgnc_symbol	tissue1	tissue2
ensembl_gene_id	baseMean	log2FoldChange	lfcSE	stat	pvalue	padj	hgnc_symbol	tissue1	tissue2
ensembl_gene_id	baseMean	log2FoldChange	lfcSE	stat	pvalue	padj	hgnc_symbol	tissue1	tissue2
ensembl_gene_id	baseMean	log2FoldChange	lfcSE	stat	pvalue	padj	hgnc_symbol	tissue1	tissue2
ensembl_gene_id	baseMean	log2FoldChange	lfcSE	stat	pvalue	padj	hgnc_symbol	tissue1	tissue2
ensembl_gene_id	baseMean	log2FoldChange	lfcSE	stat	pvalue	padj	hgnc_symbol	tissue1	tissue2
ensembl_gene_id	baseMean	log2FoldChange	lfcSE	stat	pvalue	padj	hgnc_symbol	tissue1	tissue2
ensembl_gene_id	baseMean	log2FoldChange	lfcSE	stat	pvalue	padj	hgnc_symbol	tissue1	tissue2
ensembl_gene_id	baseMean	log2FoldChange	lfcSE	stat	pvalue	padj	hgnc_symbol	tissue1	tissue2
ensembl_gene_id	baseMean	log2FoldChange	lfcSE	stat	pvalue	padj	hgnc_symbol	tissue1	tissue2
ensembl_gene_id	baseMean	log2FoldChange	lfcSE	stat	pvalue	padj	hgnc_symbol	tissue1	tissue2
ensembl_gene_id	baseMean	log2FoldChange	lfcSE	stat	pvalue	padj	hgnc_symbol	tissue1	tissue2
ensembl_gene_id	baseMean	log2FoldChange	lfcSE	stat	pvalue	padj	hgnc_symbol	tissue1	tissue2
ensembl_gene_id	baseMean	log2FoldChange	lfcSE	stat	pvalue	padj	hgnc_symbol	tissue1	tissue2
ensembl_gene_id	baseMean	log2FoldChange	lfcSE	stat	pvalue	padj	hgnc_symbol	tissue1	tissue2
ensembl_gene_id	baseMean	log2FoldChange	lfcSE	stat	pvalue	padj	hgnc_symbol	tissue1	tissue2
ensembl_gene_id	baseMean	log2FoldChange	lfcSE	stat	pvalue	padj	hgnc_symbol	tissue1	tissue2
ensembl_gene_id	baseMean	log2FoldChange	lfcSE	stat	pvalue	padj	hgnc_symbol	tissue1	tissue2
ensembl_gene_id	baseMean	log2FoldChange	lfcSE	stat	pvalue	padj	hgnc_symbol	tissue1	tissue2
ensembl_gene_id	baseMean	log2FoldChange	lfcSE	stat	pvalue	padj	hgnc_symbol	tissue1	tissue2
ensembl_gene_id	baseMean	log2FoldChange	lfcSE	stat	pvalue	padj	hgnc_symbol	tissue1	tissue2
ensembl_gene_id	baseMean	log2FoldChange	lfcSE	stat	pvalue	padj	hgnc_symbol	tissue1	tissue2
ensembl_gene_id	baseMean	log2FoldChange	lfcSE	stat	pvalue	padj	hgnc_symbol	tissue1	tissue2
ensembl_gene_id	baseMean	log2FoldChange	lfcSE	stat	pvalue	padj	hgnc_symbol	tissue1	tissue2
ensembl_gene_id	baseMean	log2FoldChange	lfcSE	stat	pvalue	padj	hgnc_symbol	tissue1	tissue2
ensembl_gene_id	baseMean	log2FoldChange	lfcSE	stat	pvalue	padj	hgnc_symbol	tissue1	tissue2
ensembl_gene_id	baseMean	log2FoldChange	lfcSE	stat	pvalue	padj	hgnc_symbol	tissue1	tissue2
ensembl_gene_id	baseMean	log2FoldChange	lfcSE	stat	pvalue	padj	hgnc_symbol	tissue1	tissue2
ensembl_gene_id	baseMean	log2FoldChange	lfcSE	stat	pvalue	padj	hgnc_symbol	tissue1	tissue2
ensembl_gene_id	baseMean	log2FoldChange	lfcSE	stat	pvalue	padj	hgnc_symbol	tissue1	tissue2
ensembl_gene_id	baseMean	log2FoldChange	lfcSE	stat	pvalue	padj	hgnc_symbol	tissue1	tissue2
ensembl_gene_id	baseMean	log2FoldChange	lfcSE	stat	pvalue	padj	hgnc_symbol	tissue1	tissue2
ensembl_gene_id	baseMean	log2FoldChange	lfcSE	stat	pvalue	padj	hgnc_symbol	tissue1	tissue2
ensembl_gene_id	baseMean	log2FoldChange	lfcSE	stat	pvalue	padj	hgnc_symbol	tissue1	tissue2
ensembl_gene_id	baseMean	log2FoldChange	lfcSE	stat	pvalue	padj	hgnc_symbol	tissue1	tissue2
ensembl_gene_id	baseMean	log2FoldChange	lfcSE	stat	pvalue	padj	hgnc_symbol	tissue1	tissue2
ensembl_gene_id	baseMean	log2FoldChange	lfcSE	stat	pvalue	padj	hgnc_symbol	tissue1	tissue2
ensembl_gene_id	baseMean	log2FoldChange	lfcSE	stat	pvalue	padj	hgnc_symbol	tissue1	tissue2
ensembl_gene_id	baseMean	log2FoldChange	lfcSE	stat	pvalue	padj	hgnc_symbol	tissue1	tissue2
ensembl_gene_id	baseMean	log2FoldChange	lfcSE	stat	pvalue	padj	hgnc_symbol	tissue1	tissue2
ensembl_gene_id	baseMean	log2FoldChange	lfcSE	stat	pvalue	padj	hgnc_symbol	tissue1	tissue2
ensembl_gene_id	baseMean	log2FoldChange	lfcSE	stat	pvalue	padj	hgnc_symbol	tissue1	tissue2
ensembl_gene_id	baseMean	log2FoldChange	lfcSE	stat	pvalue	padj	hgnc_symbol	tissue1	tissue2
ensembl_gene_id	baseMean	log2FoldChange	lfcSE	stat	pvalue	padj	hgnc_symbol	tissue1	tissue2
ensembl_gene_id	baseMean	log2FoldChange	lfcSE	stat	pvalue	padj	hgnc_symbol	tissue1	tissue2
ensembl_gene_id	baseMean	log2FoldChange	lfcSE	stat	pvalue	padj	hgnc_symbol	tissue1	tissue2
ensembl_gene_id	baseMean	log2FoldChange	lfcSE	stat	pvalue	padj	hgnc_symbol	tissue1	tissue2
ensembl_gene_id	baseMean	log2FoldChange	lfcSE	stat	pvalue	padj	hgnc_symbol	tissue1	tissue2
ensembl_gene_id	baseMean	log2FoldChange	lfcSE	stat	pvalue	padj	hgnc_symbol	tissue1	tissue2
ensembl_gene_id	baseMean	log2FoldChange	lfcSE	stat	pvalue	padj	hgnc_symbol	tissue1	tissue2
ensembl_gene_id	baseMean	log2FoldChange	lfcSE	stat	pvalue	padj	hgnc_symbol	tissue1	tissue2
ensembl_gene_id	baseMean	log2FoldChange	lfcSE	stat	pvalue	padj	hgnc_symbol	tissue1	tissue2
ensembl_gene_id	baseMean	log2FoldChange	lfcSE	stat	pvalue	padj	hgnc_symbol	tissue1	tissue2
ensembl_gene_id	baseMean	log2FoldChange	lfcSE	stat	pvalue	padj	hgnc_symbol	tissue1	tissue2
ensembl_gene_id	baseMean	log2FoldChange	lfcSE	stat	pvalue	padj	hgnc_symbol	tissue1	tissue2
ensembl_gene_id	baseMean	log2FoldChange	lfcSE	stat	pvalue	padj	hgnc_symbol	tissue1	tissue2
ensembl_gene_id	baseMean	log2FoldChange	lfcSE	stat	pvalue	padj	hgnc_symbol	tissue1	tissue2
ensembl_gene_id	baseMean	log2FoldChange	lfcSE	stat	pvalue	padj	hgnc_symbol	tissue1	tissue2
ensembl_gene_id	baseMean	log2FoldChange	lfcSE	stat	pvalue	padj	hgnc_symbol	tissue1	tissue2
ensembl_gene_id	baseMean	log2FoldChange	lfcSE	stat	pvalue	padj	hgnc_symbol	tissue1	tissue2
ensembl_gene_id	baseMean	log2FoldChange	lfcSE	stat	pvalue	padj	hgnc_symbol	tissue1	tissue2
ensembl_gene_id	baseMean	log2FoldChange	lfcSE	stat	pvalue	padj	hgnc_symbol	tissue1	tissue2
ensembl_gene_id	baseMean	log2FoldChange	lfcSE	stat	pvalue	padj	hgnc_symbol	tissue1	tissue2
ensembl_gene_id	baseMean	log2FoldChange	lfcSE	stat	pvalue	padj	hgnc_symbol	tissue1	tissue2
ensembl_gene_id	baseMean	log2FoldChange	lfcSE	stat	pvalue	padj	hgnc_symbol	tissue1	tissue2
ensembl_gene_id	baseMean	log2FoldChange	lfcSE	stat	pvalue	padj	hgnc_symbol	tissue1	tissue2
ensembl_gene_id	baseMean	log2FoldChange	lfcSE	stat	pvalue	padj	hgnc_symbol	tissue1	tissue2
ensembl_gene_id	baseMean	log2FoldChange	lfcSE	stat	pvalue	padj	hgnc_symbol	tissue1	tissue2
ensembl_gene_id	baseMean	log2FoldChange	lfcSE	stat	pvalue	padj	hgnc_symbol	tissue1	tissue2
ensembl_gene_id	baseMean	log2FoldChange	lfcSE	stat	pvalue	padj	hgnc_symbol	tissue1	tissue2
ensembl_gene_id	baseMean	log2FoldChange	lfcSE	stat	pvalue	padj	hgnc_symbol	tissue1	tissue2
ensembl_gene_id	baseMean	log2FoldChange	lfcSE	stat	pvalue	padj	hgnc_symbol	tissue1	tissue2
ensembl_gene_id	baseMean	log2FoldChange	lfcSE	stat	pvalue	padj	hgnc_symbol	tissue1	tissue2
ensembl_gene_id	baseMean	log2FoldChange	lfcSE	stat	pvalue	padj	hgnc_symbol	tissue1	tissue2
ensembl_gene_id	baseMean	log2FoldChange	lfcSE	stat	pvalue	padj	hgnc_symbol	tissue1	tissue2
ensembl_gene_id	baseMean	log2FoldChange	lfcSE	stat	pvalue	padj	hgnc_symbol	tissue1	tissue2
ensembl_gene_id	baseMean	log2FoldChange	lfcSE	stat	pvalue	padj	hgnc_symbol	tissue1	tissue2
ensembl_gene_id	baseMean	log2FoldChange	lfcSE	stat	pvalue	padj	hgnc_symbol	tissue1	tissue2
ensembl_gene_id	baseMean	log2FoldChange	lfcSE	stat	pvalue	padj	hgnc_symbol	tissue1	tissue2
ensembl_gene_id	baseMean	log2FoldChange	lfcSE	stat	pvalue	padj	hgnc_symbol	tissue1	tissue2
ensembl_gene_id	baseMean	log2FoldChange	lfcSE	stat	pvalue	padj	hgnc_symbol	tissue1	tissue2
ensembl_gene_id	baseMean	log2FoldChange	lfcSE	stat	pvalue	padj	hgnc_symbol	tissue1	tissue2
ensembl_gene_id	baseMean	log2FoldChange	lfcSE	stat	pvalue	padj	hgnc_symbol	tissue1	tissue2
ensembl_gene_id	baseMean	log2FoldChange	lfcSE	stat	pvalue	padj	hgnc_symbol	tissue1	tissue2
ensembl_gene_id	baseMean	log2FoldChange	lfcSE	stat	pvalue	padj	hgnc_symbol	tissue1	tissue2
ensembl_gene_id	baseMean	log2FoldChange	lfcSE	stat	pvalue	padj	hgnc_symbol	tissue1	tissue2
ensembl_gene_id	baseMean	log2FoldChange	lfcSE	stat	pvalue	padj	hgnc_symbol	tissue1	tissue2
ensembl_gene_id	baseMean	log2FoldChange	lfcSE	stat	pvalue	padj	hgnc_symbol	tissue1	tissue2
ensembl_gene_id	baseMean	log2FoldChange	lfcSE	stat	pvalue	padj	hgnc_symbol	tissue1	tissue2
ensembl_gene_id	baseMean	log2FoldChange	lfcSE	stat	pvalue	padj	hgnc_symbol	tissue1	tissue2
ensembl_gene_id	baseMean	log2FoldChange	lfcSE	stat	pvalue	padj	hgnc_symbol	tissue1	tissue2
ensembl_gene_id	baseMean	log2FoldChange	lfcSE	stat	pvalue	padj	hgnc_symbol	tissue1	tissue2
ensembl_gene_id	baseMean	log2FoldChange	lfcSE	stat	pvalue	padj	hgnc_symbol	tissue1	tissue2
ensembl_gene_id	baseMean	log2FoldChange	lfcSE	stat	pvalue	padj	hgnc_symbol	tissue1	tissue2
ensembl_gene_id	baseMean	log2FoldChange	lfcSE	stat	pvalue	padj	hgnc_symbol	tissue1	tissue2
ensembl_gene_id	baseMean	log2FoldChange	lfcSE	stat	pvalue	padj	hgnc_symbol	tissue1	tissue2
ensembl_gene_id	baseMean	log2FoldChange	lfcSE	stat	pvalue	padj	hgnc_symbol	tissue1	tissue2
ensembl_gene_id	baseMean	log2FoldChange	lfcSE	stat	pvalue	padj	hgnc_symbol	tissue1	tissue2
ensembl_gene_id	baseMean	log2FoldChange	lfcSE	stat	pvalue	padj	hgnc_symbol	tissue1	tissue2
ensembl_gene_id	baseMean	log2FoldChange	lfcSE	stat	pvalue	padj	hgnc_symbol	tissue1	tissue2
ensembl_gene_id	baseMean	log2FoldChange	lfcSE	stat	pvalue	padj	hgnc_symbol	tissue1	tissue2
ensembl_gene_id	baseMean	log2FoldChange	lfcSE	stat	pvalue	padj	hgnc_symbol	tissue1	tissue2
ensembl_gene_id	baseMean	log2FoldChange	lfcSE	stat	pvalue	padj	hgnc_symbol	tissue1	tissue2
ensembl_gene_id	baseMean	log2FoldChange	lfcSE	stat	pvalue	padj	hgnc_symbol	tissue1	tissue2
ensembl_gene_id	baseMean	log2FoldChange	lfcSE	stat	pvalue	padj	hgnc_symbol	tissue1	tissue2
ensembl_gene_id	baseMean	log2FoldChange	lfcSE	stat	pvalue	padj	hgnc_symbol	tissue1	tissue2
ensembl_gene_id	baseMean	log2FoldChange	lfcSE	stat	pvalue	padj	hgnc_symbol	tissue1	tissue2
ensembl_gene_id	baseMean	log2FoldChange	lfcSE	stat	pvalue	padj	hgnc_symbol	tissue1	tissue2
ensembl_gene_id	baseMean	log2FoldChange	lfcSE	stat	pvalue	padj	hgnc_symbol	tissue1	tissue2
ensembl_gene_id	baseMean	log2FoldChange	lfcSE	stat	pvalue	padj	hgnc_symbol	tissue1	tissue2
ensembl_gene_id	baseMean	log2FoldChange	lfcSE	stat	pvalue	padj	hgnc_symbol	tissue1	tissue2
ensembl_gene_id	baseMean	log2FoldChange	lfcSE	stat	pvalue	padj	hgnc_symbol	tissue1	tissue2
ensembl_gene_id	baseMean	log2FoldChange	lfcSE	stat	pvalue	padj	hgnc_symbol	tissue1	tissue2
ensembl_gene_id	baseMean	log2FoldChange	lfcSE	stat	pvalue	padj	hgnc_symbol	tissue1	tissue2
ensembl_gene_id	baseMean	log2FoldChange	lfcSE	stat	pvalue	padj	hgnc_symbol	tissue1	tissue2
ensembl_gene_id	baseMean	log2FoldChange	lfcSE	stat	pvalue	padj	hgnc_symbol	tissue1	tissue2
ensembl_gene_id	baseMean	log2FoldChange	lfcSE	stat	pvalue	padj	hgnc_symbol	tissue1	tissue2
ensembl_gene_id	baseMean	log2FoldChange	lfcSE	stat	pvalue	padj	hgnc_symbol	tissue1	tissue2
ensembl_gene_id	baseMean	log2FoldChange	lfcSE	stat	pvalue	padj	hgnc_symbol	tissue1	tissue2
ensembl_gene_id	baseMean	log2FoldChange	lfcSE	stat	pvalue	padj	hgnc_symbol	tissue1	tissue2
ensembl_gene_id	baseMean	log2FoldChange	lfcSE	stat	pvalue	padj	hgnc_symbol	tissue1	tissue2
ensembl_gene_id	baseMean	log2FoldChange	lfcSE	stat	pvalue	padj	hgnc_symbol	tissue1	tissue2
ensembl_gene_id	baseMean	log2FoldChange	lfcSE	stat	pvalue	padj	hgnc_symbol	tissue1	tissue2
ensembl_gene_id	baseMean	log2FoldChange	lfcSE	stat	pvalue	padj	hgnc_symbol	tissue1	tissue2
ensembl_gene_id	baseMean	log2FoldChange	lfcSE	stat	pvalue	padj	hgnc_symbol	tissue1	tissue2
ensembl_gene_id	baseMean	log2FoldChange	lfcSE	stat	pvalue	padj	hgnc_symbol	tissue1	tissue2
ensembl_gene_id	baseMean	log2FoldChange	lfcSE	stat	pvalue	padj	hgnc_symbol	tissue1	tissue2
ensembl_gene_id	baseMean	log2FoldChange	lfcSE	stat	pvalue	padj	hgnc_symbol	tissue1	tissue2
ensembl_gene_id	baseMean	log2FoldChange	lfcSE	stat	pvalue	padj	hgnc_symbol	tissue1	tissue2
ensembl_gene_id	baseMean	log2FoldChange	lfcSE	stat	pvalue	padj	hgnc_symbol	tissue1	tissue2
ensembl_gene_id	baseMean	log2FoldChange	lfcSE	stat	pvalue	padj	hgnc_symbol	tissue1	tissue2
ensembl_gene_id	baseMean	log2FoldChange	lfcSE	stat	pvalue	padj	hgnc_symbol	tissue1	tissue2
ensembl_gene_id	baseMean	log2FoldChange	lfcSE	stat	pvalue	padj	hgnc_symbol	tissue1	tissue2
ensembl_gene_id	baseMean	log2FoldChange	lfcSE	stat	pvalue	padj	hgnc_symbol	tissue1	tissue2
ensembl_gene_id	baseMean	log2FoldChange	lfcSE	stat	pvalue	padj	hgnc_symbol	tissue1	tissue2
ensembl_gene_id	baseMean	log2FoldChange	lfcSE	stat	pvalue	padj	hgnc_symbol	tissue1	tissue2
ensembl_gene_id	baseMean	log2FoldChange	lfcSE	stat	pvalue	padj	hgnc_symbol	tissue1	tissue2
ensembl_gene_id	baseMean	log2FoldChange	lfcSE	stat	pvalue	padj	hgnc_symbol	tissue1	tissue2
ensembl_gene_id	baseMean	log2FoldChange	lfcSE	stat	pvalue	padj	hgnc_symbol	tissue1	tissue2
ensembl_gene_id	baseMean	log2FoldChange	lfcSE	stat	pvalue	padj	hgnc_symbol	tissue1	tissue2
ensembl_gene_id	baseMean	log2FoldChange	lfcSE	stat	pvalue	padj	hgnc_symbol	tissue1	tissue2
ensembl_gene_id	baseMean	log2FoldChange	lfcSE	stat	pvalue	padj	hgnc_symbol	tissue1	tissue2
ensembl_gene_id	baseMean	log2FoldChange	lfcSE	stat	pvalue	padj	hgnc_symbol	tissue1	tissue2
ensembl_gene_id	baseMean	log2FoldChange	lfcSE	stat	pvalue	padj	hgnc_symbol	tissue1	tissue2
ensembl_gene_id	baseMean	log2FoldChange	lfcSE	stat	pvalue	padj	hgnc_symbol	tissue1	tissue2
ensembl_gene_id	baseMean	log2FoldChange	lfcSE	stat	pvalue	padj	hgnc_symbol	tissue1	tissue2
ensembl_gene_id	baseMean	log2FoldChange	lfcSE	stat	pvalue	padj	hgnc_symbol	tissue1	tissue2
ensembl_gene_id	baseMean	log2FoldChange	lfcSE	stat	pvalue	padj	hgnc_symbol	tissue1	tissue2
ensembl_gene_id	baseMean	log2FoldChange	lfcSE	stat	pvalue	padj	hgnc_symbol	tissue1	tissue2
ensembl_gene_id	baseMean	log2FoldChange	lfcSE	stat	pvalue	padj	hgnc_symbol	tissue1	tissue2
ensembl_gene_id	baseMean	log2FoldChange	lfcSE	stat	pvalue	padj	hgnc_symbol	tissue1	tissue2
ensembl_gene_id	baseMean	log2FoldChange	lfcSE	stat	pvalue	padj	hgnc_symbol	tissue1	tissue2
ensembl_gene_id	baseMean	log2FoldChange	lfcSE	stat	pvalue	padj	hgnc_symbol	tissue1	tissue2
ensembl_gene_id	baseMean	log2FoldChange	lfcSE	stat	pvalue	padj	hgnc_symbol	tissue1	tissue2
ensembl_gene_id	baseMean	log2FoldChange	lfcSE	stat	pvalue	padj	hgnc_symbol	tissue1	tissue2
ensembl_gene_id	baseMean	log2FoldChange	lfcSE	stat	pvalue	padj	hgnc_symbol	tissue1	tissue2
ensembl_gene_id	baseMean	log2FoldChange	lfcSE	stat	pvalue	padj	hgnc_symbol	tissue1	tissue2
ensembl_gene_id	baseMean	log2FoldChange	lfcSE	stat	pvalue	padj	hgnc_symbol	tissue1	tissue2
ensembl_gene_id	baseMean	log2FoldChange	lfcSE	stat	pvalue	padj	hgnc_symbol	tissue1	tissue2
ensembl_gene_id	baseMean	log2FoldChange	lfcSE	stat	pvalue	padj	hgnc_symbol	tissue1	tissue2
ensembl_gene_id	baseMean	log2FoldChange	lfcSE	stat	pvalue	padj	hgnc_symbol	tissue1	tissue2
ensembl_gene_id	baseMean	log2FoldChange	lfcSE	stat	pvalue	padj	hgnc_symbol	tissue1	tissue2
ensembl_gene_id	baseMean	log2FoldChange	lfcSE	stat	pvalue	padj	hgnc_symbol	tissue1	tissue2
ensembl_gene_id	baseMean	log2FoldChange	lfcSE	stat	pvalue	padj	hgnc_symbol	tissue1	tissue2
ensembl_gene_id	baseMean	log2FoldChange	lfcSE	stat	pvalue	padj	hgnc_symbol	tissue1	tissue2
ensembl_gene_id	baseMean	log2FoldChange	lfcSE	stat	pvalue	padj	hgnc_symbol	tissue1	tissue2
ensembl_gene_id	baseMean	log2FoldChange	lfcSE	stat	pvalue	padj	hgnc_symbol	tissue1	tissue2
ensembl_gene_id	baseMean	log2FoldChange	lfcSE	stat	pvalue	padj	hgnc_symbol	tissue1	tissue2
ensembl_gene_id	baseMean	log2FoldChange	lfcSE	stat	pvalue	padj	hgnc_symbol	tissue1	tissue2
ensembl_gene_id	baseMean	log2FoldChange	lfcSE	stat	pvalue	padj	hgnc_symbol	tissue1	tissue2
ensembl_gene_id	baseMean	log2FoldChange	lfcSE	stat	pvalue	padj	hgnc_symbol	tissue1	tissue2
ensembl_gene_id	baseMean	log2FoldChange	lfcSE	stat	pvalue	padj	hgnc_symbol	tissue1	tissue2
ensembl_gene_id	baseMean	log2FoldChange	lfcSE	stat	pvalue	padj	hgnc_symbol	tissue1	tissue2
ensembl_gene_id	baseMean	log2FoldChange	lfcSE	stat	pvalue	padj	hgnc_symbol	tissue1	tissue2
ensembl_gene_id	baseMean	log2FoldChange	lfcSE	stat	pvalue	padj	hgnc_symbol	tissue1	tissue2
ensembl_gene_id	baseMean	log2FoldChange	lfcSE	stat	pvalue	padj	hgnc_symbol	tissue1	tissue2
ensembl_gene_id	baseMean	log2FoldChange	lfcSE	stat	pvalue	padj	hgnc_symbol	tissue1	tissue2
ensembl_gene_id	baseMean	log2FoldChange	lfcSE	stat	pvalue	padj	hgnc_symbol	tissue1	tissue2
ensembl_gene_id	baseMean	log2FoldChange	lfcSE	stat	pvalue	padj	hgnc_symbol	tissue1	tissue2
ensembl_gene_id	baseMean	log2FoldChange	lfcSE	stat	pvalue	padj	hgnc_symbol	tissue1	tissue2
ensembl_gene_id	baseMean	log2FoldChange	lfcSE	stat	pvalue	padj	hgnc_symbol	tissue1	tissue2
ensembl_gene_id	baseMean	log2FoldChange	lfcSE	stat	pvalue	padj	hgnc_symbol	tissue1	tissue2
ensembl_gene_id	baseMean	log2FoldChange	lfcSE	stat	pvalue	padj	hgnc_symbol	tissue1	tissue2
ensembl_gene_id	baseMean	log2FoldChange	lfcSE	stat	pvalue	padj	hgnc_symbol	tissue1	tissue2
ensembl_gene_id	baseMean	log2FoldChange	lfcSE	stat	pvalue	padj	hgnc_symbol	tissue1	tissue2
ensembl_gene_id	baseMean	log2FoldChange	lfcSE	stat	pvalue	padj	hgnc_symbol	tissue1	tissue2
ensembl_gene_id	baseMean	log2FoldChange	lfcSE	stat	pvalue	padj	hgnc_symbol	tissue1	tissue2
ensembl_gene_id	baseMean	log2FoldChange	lfcSE	stat	pvalue	padj	hgnc_symbol	tissue1	tissue2
ensembl_gene_id	baseMean	log2FoldChange	lfcSE	stat	pvalue	padj	hgnc_symbol	tissue1	tissue2
ensembl_gene_id	baseMean	log2FoldChange	lfcSE	stat	pvalue	padj	hgnc_symbol	tissue1	tissue2
ensembl_gene_id	baseMean	log2FoldChange	lfcSE	stat	pvalue	padj	hgnc_symbol	tissue1	tissue2
ensembl_gene_id	baseMean	log2FoldChange	lfcSE	stat	pvalue	padj	hgnc_symbol	tissue1	tissue2
ensembl_gene_id	baseMean	log2FoldChange	lfcSE	stat	pvalue	padj	hgnc_symbol	tissue1	tissue2
ensembl_gene_id	baseMean	log2FoldChange	lfcSE	stat	pvalue	padj	hgnc_symbol	tissue1	tissue2
ensembl_gene_id	baseMean	log2FoldChange	lfcSE	stat	pvalue	padj	hgnc_symbol	tissue1	tissue2
ensembl_gene_id	baseMean	log2FoldChange	lfcSE	stat	pvalue	padj	hgnc_symbol	tissue1	tissue2
ensembl_gene_id	baseMean	log2FoldChange	lfcSE	stat	pvalue	padj	hgnc_symbol	tissue1	tissue2
ensembl_gene_id	baseMean	log2FoldChange	lfcSE	stat	pvalue	padj	hgnc_symbol	tissue1	tissue2
ensembl_gene_id	baseMean	log2FoldChange	lfcSE	stat	pvalue	padj	hgnc_symbol	tissue1	tissue2
ensembl_gene_id	baseMean	log2FoldChange	lfcSE	stat	pvalue	padj	hgnc_symbol	tissue1	tissue2
ensembl_gene_id	baseMean	log2FoldChange	lfcSE	stat	pvalue	padj	hgnc_symbol	tissue1	tissue2
ensembl_gene_id	baseMean	log2FoldChange	lfcSE	stat	pvalue	padj	hgnc_symbol	tissue1	tissue2
ensembl_gene_id	baseMean	log2FoldChange	lfcSE	stat	pvalue	padj	hgnc_symbol	tissue1	tissue2
ensembl_gene_id	baseMean	log2FoldChange	lfcSE	stat	pvalue	padj	hgnc_symbol	tissue1	tissue2
ensembl_gene_id	baseMean	log2FoldChange	lfcSE	stat	pvalue	padj	hgnc_symbol	tissue1	tissue2
ensembl_gene_id	baseMean	log2FoldChange	lfcSE	stat	pvalue	padj	hgnc_symbol	tissue1	tissue2
ensembl_gene_id	baseMean	log2FoldChange	lfcSE	stat	pvalue	padj	hgnc_symbol	tissue1	tissue2
ensembl_gene_id	baseMean	log2FoldChange	lfcSE	stat	pvalue	padj	hgnc_symbol	tissue1	tissue2
ensembl_gene_id	baseMean	log2FoldChange	lfcSE	stat	pvalue	padj	hgnc_symbol	tissue1	tissue2
ensembl_gene_id	baseMean	log2FoldChange	lfcSE	stat	pvalue	padj	hgnc_symbol	tissue1	tissue2
ensembl_gene_id	baseMean	log2FoldChange	lfcSE	stat	pvalue	padj	hgnc_symbol	tissue1	tissue2
ensembl_gene_id	baseMean	log2FoldChange	lfcSE	stat	pvalue	padj	hgnc_symbol	tissue1	tissue2
ensembl_gene_id	baseMean	log2FoldChange	lfcSE	stat	pvalue	padj	hgnc_symbol	tissue1	tissue2
ensembl_gene_id	baseMean	log2FoldChange	lfcSE	stat	pvalue	padj	hgnc_symbol	tissue1	tissue2
ensembl_gene_id	baseMean	log2FoldChange	lfcSE	stat	pvalue	padj	hgnc_symbol	tissue1	tissue2
ensembl_gene_id	baseMean	log2FoldChange	lfcSE	stat	pvalue	padj	hgnc_symbol	tissue1	tissue2
ensembl_gene_id	baseMean	log2FoldChange	lfcSE	stat	pvalue	padj	hgnc_symbol	tissue1	tissue2
ensembl_gene_id	baseMean	log2FoldChange	lfcSE	stat	pvalue	padj	hgnc_symbol	tissue1	tissue2
ensembl_gene_id	baseMean	log2FoldChange	lfcSE	stat	pvalue	padj	hgnc_symbol	tissue1	tissue2
ensembl_gene_id	baseMean	log2FoldChange	lfcSE	stat	pvalue	padj	hgnc_symbol	tissue1	tissue2
ensembl_gene_id	baseMean	log2FoldChange	lfcSE	stat	pvalue	padj	hgnc_symbol	tissue1	tissue2
ensembl_gene_id	baseMean	log2FoldChange	lfcSE	stat	pvalue	padj	hgnc_symbol	tissue1	tissue2
ensembl_gene_id	baseMean	log2FoldChange	lfcSE	stat	pvalue	padj	hgnc_symbol	tissue1	tissue2
ensembl_gene_id	baseMean	log2FoldChange	lfcSE	stat	pvalue	padj	hgnc_symbol	tissue1	tissue2
ensembl_gene_id	baseMean	log2FoldChange	lfcSE	stat	pvalue	padj	hgnc_symbol	tissue1	tissue2
ensembl_gene_id	baseMean	log2FoldChange	lfcSE	stat	pvalue	padj	hgnc_symbol	tissue1	tissue2
ensembl_gene_id	baseMean	log2FoldChange	lfcSE	stat	pvalue	padj	hgnc_symbol	tissue1	tissue2
ensembl_gene_id	baseMean	log2FoldChange	lfcSE	stat	pvalue	padj	hgnc_symbol	tissue1	tissue2
ensembl_gene_id	baseMean	log2FoldChange	lfcSE	stat	pvalue	padj	hgnc_symbol	tissue1	tissue2
ensembl_gene_id	baseMean	log2FoldChange	lfcSE	stat	pvalue	padj	hgnc_symbol	tissue1	tissue2
ensembl_gene_id	baseMean	log2FoldChange	lfcSE	stat	pvalue	padj	hgnc_symbol	tissue1	tissue2
ensembl_gene_id	baseMean	log2FoldChange	lfcSE	stat	pvalue	padj	hgnc_symbol	tissue1	tissue2
ensembl_gene_id	baseMean	log2FoldChange	lfcSE	stat	pvalue	padj	hgnc_symbol	tissue1	tissue2
ensembl_gene_id	baseMean	log2FoldChange	lfcSE	stat	pvalue	padj	hgnc_symbol	tissue1	tissue2
ensembl_gene_id	baseMean	log2FoldChange	lfcSE	stat	pvalue	padj	hgnc_symbol	tissue1	tissue2
ensembl_gene_id	baseMean	log2FoldChange	lfcSE	stat	pvalue	padj	hgnc_symbol	tissue1	tissue2
ensembl_gene_id	baseMean	log2FoldChange	lfcSE	stat	pvalue	padj	hgnc_symbol	tissue1	tissue2
ensembl_gene_id	baseMean	log2FoldChange	lfcSE	stat	pvalue	padj	hgnc_symbol	tissue1	tissue2
ensembl_gene_id	baseMean	log2FoldChange	lfcSE	stat	pvalue	padj	hgnc_symbol	tissue1	tissue2
ensembl_gene_id	baseMean	log2FoldChange	lfcSE	stat	pvalue	padj	hgnc_symbol	tissue1	tissue2
ensembl_gene_id	baseMean	log2FoldChange	lfcSE	stat	pvalue	padj	hgnc_symbol	tissue1	tissue2
ensembl_gene_id	baseMean	log2FoldChange	lfcSE	stat	pvalue	padj	hgnc_symbol	tissue1	tissue2
ensembl_gene_id	baseMean	log2FoldChange	lfcSE	stat	pvalue	padj	hgnc_symbol	tissue1	tissue2
ensembl_gene_id	baseMean	log2FoldChange	lfcSE	stat	pvalue	padj	hgnc_symbol	tissue1	tissue2
ensembl_gene_id	baseMean	log2FoldChange	lfcSE	stat	pvalue	padj	hgnc_symbol	tissue1	tissue2
ensembl_gene_id	baseMean	log2FoldChange	lfcSE	stat	pvalue	padj	hgnc_symbol	tissue1	tissue2
ensembl_gene_id	baseMean	log2FoldChange	lfcSE	stat	pvalue	padj	hgnc_symbol	tissue1	tissue2
ensembl_gene_id	baseMean	log2FoldChange	lfcSE	stat	pvalue	padj	hgnc_symbol	tissue1	tissue2
ensembl_gene_id	baseMean	log2FoldChange	lfcSE	stat	pvalue	padj	hgnc_symbol	tissue1	tissue2
ensembl_gene_id	baseMean	log2FoldChange	lfcSE	stat	pvalue	padj	hgnc_symbol	tissue1	tissue2
ensembl_gene_id	baseMean	log2FoldChange	lfcSE	stat	pvalue	padj	hgnc_symbol	tissue1	tissue2
ensembl_gene_id	baseMean	log2FoldChange	lfcSE	stat	pvalue	padj	hgnc_symbol	tissue1	tissue2
ensembl_gene_id	baseMean	log2FoldChange	lfcSE	stat	pvalue	padj	hgnc_symbol	tissue1	tissue2
ensembl_gene_id	baseMean	log2FoldChange	lfcSE	stat	pvalue	padj	hgnc_symbol	tissue1	tissue2
ensembl_gene_id	baseMean	log2FoldChange	lfcSE	stat	pvalue	padj	hgnc_symbol	tissue1	tissue2
ensembl_gene_id	baseMean	log2FoldChange	lfcSE	stat	pvalue	padj	hgnc_symbol	tissue1	tissue2
ensembl_gene_id	baseMean	log2FoldChange	lfcSE	stat	pvalue	padj	hgnc_symbol	tissue1	tissue2
ensembl_gene_id	baseMean	log2FoldChange	lfcSE	stat	pvalue	padj	hgnc_symbol	tissue1	tissue2
ensembl_gene_id	baseMean	log2FoldChange	lfcSE	stat	pvalue	padj	hgnc_symbol	tissue1	tissue2
ensembl_gene_id	baseMean	log2FoldChange	lfcSE	stat	pvalue	padj	hgnc_symbol	tissue1	tissue2
ensembl_gene_id	baseMean	log2FoldChange	lfcSE	stat	pvalue	padj	hgnc_symbol	tissue1	tissue2
ensembl_gene_id	baseMean	log2FoldChange	lfcSE	stat	pvalue	padj	hgnc_symbol	tissue1	tissue2
ensembl_gene_id	baseMean	log2FoldChange	lfcSE	stat	pvalue	padj	hgnc_symbol	tissue1	tissue2
ensembl_gene_id	baseMean	log2FoldChange	lfcSE	stat	pvalue	padj	hgnc_symbol	tissue1	tissue2
ensembl_gene_id	baseMean	log2FoldChange	lfcSE	stat	pvalue	padj	hgnc_symbol	tissue1	tissue2
ensembl_gene_id	baseMean	log2FoldChange	lfcSE	stat	pvalue	padj	hgnc_symbol	tissue1	tissue2
ensembl_gene_id	baseMean	log2FoldChange	lfcSE	stat	pvalue	padj	hgnc_symbol	tissue1	tissue2
ensembl_gene_id	baseMean	log2FoldChange	lfcSE	stat	pvalue	padj	hgnc_symbol	tissue1	tissue2
ensembl_gene_id	baseMean	log2FoldChange	lfcSE	stat	pvalue	padj	hgnc_symbol	tissue1	tissue2
ensembl_gene_id	baseMean	log2FoldChange	lfcSE	stat	pvalue	padj	hgnc_symbol	tissue1	tissue2
ensembl_gene_id	baseMean	log2FoldChange	lfcSE	stat	pvalue	padj	hgnc_symbol	tissue1	tissue2
ensembl_gene_id	baseMean	log2FoldChange	lfcSE	stat	pvalue	padj	hgnc_symbol	tissue1	tissue2
ensembl_gene_id	baseMean	log2FoldChange	lfcSE	stat	pvalue	padj	hgnc_symbol	tissue1	tissue2
ensembl_gene_id	baseMean	log2FoldChange	lfcSE	stat	pvalue	padj	hgnc_symbol	tissue1	tissue2
ensembl_gene_id	baseMean	log2FoldChange	lfcSE	stat	pvalue	padj	hgnc_symbol	tissue1	tissue2
ensembl_gene_id	baseMean	log2FoldChange	lfcSE	stat	pvalue	padj	hgnc_symbol	tissue1	tissue2
ensembl_gene_id	baseMean	log2FoldChange	lfcSE	stat	pvalue	padj	hgnc_symbol	tissue1	tissue2
ensembl_gene_id	baseMean	log2FoldChange	lfcSE	stat	pvalue	padj	hgnc_symbol	tissue1	tissue2
ensembl_gene_id	baseMean	log2FoldChange	lfcSE	stat	pvalue	padj	hgnc_symbol	tissue1	tissue2
ensembl_gene_id	baseMean	log2FoldChange	lfcSE	stat	pvalue	padj	hgnc_symbol	tissue1	tissue2
ensembl_gene_id	baseMean	log2FoldChange	lfcSE	stat	pvalue	padj	hgnc_symbol	tissue1	tissue2
ensembl_gene_id	baseMean	log2FoldChange	lfcSE	stat	pvalue	padj	hgnc_symbol	tissue1	tissue2
ensembl_gene_id	baseMean	log2FoldChange	lfcSE	stat	pvalue	padj	hgnc_symbol	tissue1	tissue2
ensembl_gene_id	baseMean	log2FoldChange	lfcSE	stat	pvalue	padj	hgnc_symbol	tissue1	tissue2
ensembl_gene_id	baseMean	log2FoldChange	lfcSE	stat	pvalue	padj	hgnc_symbol	tissue1	tissue2
ensembl_gene_id	baseMean	log2FoldChange	lfcSE	stat	pvalue	padj	hgnc_symbol	tissue1	tissue2
ensembl_gene_id	baseMean	log2FoldChange	lfcSE	stat	pvalue	padj	hgnc_symbol	tissue1	tissue2
ensembl_gene_id	baseMean	log2FoldChange	lfcSE	stat	pvalue	padj	hgnc_symbol	tissue1	tissue2
ensembl_gene_id	baseMean	log2FoldChange	lfcSE	stat	pvalue	padj	hgnc_symbol	tissue1	tissue2
ensembl_gene_id	baseMean	log2FoldChange	lfcSE	stat	pvalue	padj	hgnc_symbol	tissue1	tissue2
ensembl_gene_id	baseMean	log2FoldChange	lfcSE	stat	pvalue	padj	hgnc_symbol	tissue1	tissue2
ensembl_gene_id	baseMean	log2FoldChange	lfcSE	stat	pvalue	padj	hgnc_symbol	tissue1	tissue2
ensembl_gene_id	baseMean	log2FoldChange	lfcSE	stat	pvalue	padj	hgnc_symbol	tissue1	tissue2
ensembl_gene_id	baseMean	log2FoldChange	lfcSE	stat	pvalue	padj	hgnc_symbol	tissue1	tissue2
ensembl_gene_id	baseMean	log2FoldChange	lfcSE	stat	pvalue	padj	hgnc_symbol	tissue1	tissue2
ensembl_gene_id	baseMean	log2FoldChange	lfcSE	stat	pvalue	padj	hgnc_symbol	tissue1	tissue2
ensembl_gene_id	baseMean	log2FoldChange	lfcSE	stat	pvalue	padj	hgnc_symbol	tissue1	tissue2
ensembl_gene_id	baseMean	log2FoldChange	lfcSE	stat	pvalue	padj	hgnc_symbol	tissue1	tissue2
ensembl_gene_id	baseMean	log2FoldChange	lfcSE	stat	pvalue	padj	hgnc_symbol	tissue1	tissue2
ensembl_gene_id	baseMean	log2FoldChange	lfcSE	stat	pvalue	padj	hgnc_symbol	tissue1	tissue2
ensembl_gene_id	baseMean	log2FoldChange	lfcSE	stat	pvalue	padj	hgnc_symbol	tissue1	tissue2
ensembl_gene_id	baseMean	log2FoldChange	lfcSE	stat	pvalue	padj	hgnc_symbol	tissue1	tissue2
ensembl_gene_id	baseMean	log2FoldChange	lfcSE	stat	pvalue	padj	hgnc_symbol	tissue1	tissue2
ensembl_gene_id	baseMean	log2FoldChange	lfcSE	stat	pvalue	padj	hgnc_symbol	tissue1	tissue2
ensembl_gene_id	baseMean	log2FoldChange	lfcSE	stat	pvalue	padj	hgnc_symbol	tissue1	tissue2
ensembl_gene_id	baseMean	log2FoldChange	lfcSE	stat	pvalue	padj	hgnc_symbol	tissue1	tissue2
ensembl_gene_id	baseMean	log2FoldChange	lfcSE	stat	pvalue	padj	hgnc_symbol	tissue1	tissue2
ensembl_gene_id	baseMean	log2FoldChange	lfcSE	stat	pvalue	padj	hgnc_symbol	tissue1	tissue2
ensembl_gene_id	baseMean	log2FoldChange	lfcSE	stat	pvalue	padj	hgnc_symbol	tissue1	tissue2
ensembl_gene_id	baseMean	log2FoldChange	lfcSE	stat	pvalue	padj	hgnc_symbol	tissue1	tissue2
ensembl_gene_id	baseMean	log2FoldChange	lfcSE	stat	pvalue	padj	hgnc_symbol	tissue1	tissue2
ensembl_gene_id	baseMean	log2FoldChange	lfcSE	stat	pvalue	padj	hgnc_symbol	tissue1	tissue2
ensembl_gene_id	baseMean	log2FoldChange	lfcSE	stat	pvalue	padj	hgnc_symbol	tissue1	tissue2
ensembl_gene_id	baseMean	log2FoldChange	lfcSE	stat	pvalue	padj	hgnc_symbol	tissue1	tissue2
ensembl_gene_id	baseMean	log2FoldChange	lfcSE	stat	pvalue	padj	hgnc_symbol	tissue1	tissue2
ensembl_gene_id	baseMean	log2FoldChange	lfcSE	stat	pvalue	padj	hgnc_symbol	tissue1	tissue2
ensembl_gene_id	baseMean	log2FoldChange	lfcSE	stat	pvalue	padj	hgnc_symbol	tissue1	tissue2
ensembl_gene_id	baseMean	log2FoldChange	lfcSE	stat	pvalue	padj	hgnc_symbol	tissue1	tissue2
ensembl_gene_id	baseMean	log2FoldChange	lfcSE	stat	pvalue	padj	hgnc_symbol	tissue1	tissue2
ensembl_gene_id	baseMean	log2FoldChange	lfcSE	stat	pvalue	padj	hgnc_symbol	tissue1	tissue2
ensembl_gene_id	baseMean	log2FoldChange	lfcSE	stat	pvalue	padj	hgnc_symbol	tissue1	tissue2
ensembl_gene_id	baseMean	log2FoldChange	lfcSE	stat	pvalue	padj	hgnc_symbol	tissue1	tissue2
ensembl_gene_id	baseMean	log2FoldChange	lfcSE	stat	pvalue	padj	hgnc_symbol	tissue1	tissue2
ensembl_gene_id	baseMean	log2FoldChange	lfcSE	stat	pvalue	padj	hgnc_symbol	tissue1	tissue2
ensembl_gene_id	baseMean	log2FoldChange	lfcSE	stat	pvalue	padj	hgnc_symbol	tissue1	tissue2
ensembl_gene_id	baseMean	log2FoldChange	lfcSE	stat	pvalue	padj	hgnc_symbol	tissue1	tissue2
ensembl_gene_id	baseMean	log2FoldChange	lfcSE	stat	pvalue	padj	hgnc_symbol	tissue1	tissue2
ensembl_gene_id	baseMean	log2FoldChange	lfcSE	stat	pvalue	padj	hgnc_symbol	tissue1	tissue2
ensembl_gene_id	baseMean	log2FoldChange	lfcSE	stat	pvalue	padj	hgnc_symbol	tissue1	tissue2
ensembl_gene_id	baseMean	log2FoldChange	lfcSE	stat	pvalue	padj	hgnc_symbol	tissue1	tissue2
ensembl_gene_id	baseMean	log2FoldChange	lfcSE	stat	pvalue	padj	hgnc_symbol	tissue1	tissue2
ensembl_gene_id	baseMean	log2FoldChange	lfcSE	stat	pvalue	padj	hgnc_symbol	tissue1	tissue2
ensembl_gene_id	baseMean	log2FoldChange	lfcSE	stat	pvalue	padj	hgnc_symbol	tissue1	tissue2
ensembl_gene_id	baseMean	log2FoldChange	lfcSE	stat	pvalue	padj	hgnc_symbol	tissue1	tissue2
ensembl_gene_id	baseMean	log2FoldChange	lfcSE	stat	pvalue	padj	hgnc_symbol	tissue1	tissue2
ensembl_gene_id	baseMean	log2FoldChange	lfcSE	stat	pvalue	padj	hgnc_symbol	tissue1	tissue2
ensembl_gene_id	baseMean	log2FoldChange	lfcSE	stat	pvalue	padj	hgnc_symbol	tissue1	tissue2
ensembl_gene_id	baseMean	log2FoldChange	lfcSE	stat	pvalue	padj	hgnc_symbol	tissue1	tissue2
ensembl_gene_id	baseMean	log2FoldChange	lfcSE	stat	pvalue	padj	hgnc_symbol	tissue1	tissue2
ensembl_gene_id	baseMean	log2FoldChange	lfcSE	stat	pvalue	padj	hgnc_symbol	tissue1	tissue2
ensembl_gene_id	baseMean	log2FoldChange	lfcSE	stat	pvalue	padj	hgnc_symbol	tissue1	tissue2
ensembl_gene_id	baseMean	log2FoldChange	lfcSE	stat	pvalue	padj	hgnc_symbol	tissue1	tissue2
ensembl_gene_id	baseMean	log2FoldChange	lfcSE	stat	pvalue	padj	hgnc_symbol	tissue1	tissue2
ensembl_gene_id	baseMean	log2FoldChange	lfcSE	stat	pvalue	padj	hgnc_symbol	tissue1	tissue2
ensembl_gene_id	baseMean	log2FoldChange	lfcSE	stat	pvalue	padj	hgnc_symbol	tissue1	tissue2
ensembl_gene_id	baseMean	log2FoldChange	lfcSE	stat	pvalue	padj	hgnc_symbol	tissue1	tissue2
ensembl_gene_id	baseMean	log2FoldChange	lfcSE	stat	pvalue	padj	hgnc_symbol	tissue1	tissue2
ensembl_gene_id	baseMean	log2FoldChange	lfcSE	stat	pvalue	padj	hgnc_symbol	tissue1	tissue2
ensembl_gene_id	baseMean	log2FoldChange	lfcSE	stat	pvalue	padj	hgnc_symbol	tissue1	tissue2
ensembl_gene_id	baseMean	log2FoldChange	lfcSE	stat	pvalue	padj	hgnc_symbol	tissue1	tissue2
ensembl_gene_id	baseMean	log2FoldChange	lfcSE	stat	pvalue	padj	hgnc_symbol	tissue1	tissue2
ensembl_gene_id	baseMean	log2FoldChange	lfcSE	stat	pvalue	padj	hgnc_symbol	tissue1	tissue2
ensembl_gene_id	baseMean	log2FoldChange	lfcSE	stat	pvalue	padj	hgnc_symbol	tissue1	tissue2
ensembl_gene_id	baseMean	log2FoldChange	lfcSE	stat	pvalue	padj	hgnc_symbol	tissue1	tissue2
ensembl_gene_id	baseMean	log2FoldChange	lfcSE	stat	pvalue	padj	hgnc_symbol	tissue1	tissue2
ensembl_gene_id	baseMean	log2FoldChange	lfcSE	stat	pvalue	padj	hgnc_symbol	tissue1	tissue2
ensembl_gene_id	baseMean	log2FoldChange	lfcSE	stat	pvalue	padj	hgnc_symbol	tissue1	tissue2
ensembl_gene_id	baseMean	log2FoldChange	lfcSE	stat	pvalue	padj	hgnc_symbol	tissue1	tissue2
ensembl_gene_id	baseMean	log2FoldChange	lfcSE	stat	pvalue	padj	hgnc_symbol	tissue1	tissue2
ensembl_gene_id	baseMean	log2FoldChange	lfcSE	stat	pvalue	padj	hgnc_symbol	tissue1	tissue2
ensembl_gene_id	baseMean	log2FoldChange	lfcSE	stat	pvalue	padj	hgnc_symbol	tissue1	tissue2
ensembl_gene_id	baseMean	log2FoldChange	lfcSE	stat	pvalue	padj	hgnc_symbol	tissue1	tissue2
ensembl_gene_id	baseMean	log2FoldChange	lfcSE	stat	pvalue	padj	hgnc_symbol	tissue1	tissue2
ensembl_gene_id	baseMean	log2FoldChange	lfcSE	stat	pvalue	padj	hgnc_symbol	tissue1	tissue2
ensembl_gene_id	baseMean	log2FoldChange	lfcSE	stat	pvalue	padj	hgnc_symbol	tissue1	tissue2
ensembl_gene_id	baseMean	log2FoldChange	lfcSE	stat	pvalue	padj	hgnc_symbol	tissue1	tissue2
ensembl_gene_id	baseMean	log2FoldChange	lfcSE	stat	pvalue	padj	hgnc_symbol	tissue1	tissue2
ensembl_gene_id	baseMean	log2FoldChange	lfcSE	stat	pvalue	padj	hgnc_symbol	tissue1	tissue2
ensembl_gene_id	baseMean	log2FoldChange	lfcSE	stat	pvalue	padj	hgnc_symbol	tissue1	tissue2
ensembl_gene_id	baseMean	log2FoldChange	lfcSE	stat	pvalue	padj	hgnc_symbol	tissue1	tissue2
ensembl_gene_id	baseMean	log2FoldChange	lfcSE	stat	pvalue	padj	hgnc_symbol	tissue1	tissue2
ensembl_gene_id	baseMean	log2FoldChange	lfcSE	stat	pvalue	padj	hgnc_symbol	tissue1	tissue2
ensembl_gene_id	baseMean	log2FoldChange	lfcSE	stat	pvalue	padj	hgnc_symbol	tissue1	tissue2
ensembl_gene_id	baseMean	log2FoldChange	lfcSE	stat	pvalue	padj	hgnc_symbol	tissue1	tissue2
ensembl_gene_id	baseMean	log2FoldChange	lfcSE	stat	pvalue	padj	hgnc_symbol	tissue1	tissue2
ensembl_gene_id	baseMean	log2FoldChange	lfcSE	stat	pvalue	padj	hgnc_symbol	tissue1	tissue2
ensembl_gene_id	baseMean	log2FoldChange	lfcSE	stat	pvalue	padj	hgnc_symbol	tissue1	tissue2
ensembl_gene_id	baseMean	log2FoldChange	lfcSE	stat	pvalue	padj	hgnc_symbol	tissue1	tissue2
ensembl_gene_id	baseMean	log2FoldChange	lfcSE	stat	pvalue	padj	hgnc_symbol	tissue1	tissue2
ensembl_gene_id	baseMean	log2FoldChange	lfcSE	stat	pvalue	padj	hgnc_symbol	tissue1	tissue2
ensembl_gene_id	baseMean	log2FoldChange	lfcSE	stat	pvalue	padj	hgnc_symbol	tissue1	tissue2
ensembl_gene_id	baseMean	log2FoldChange	lfcSE	stat	pvalue	padj	hgnc_symbol	tissue1	tissue2
ensembl_gene_id	baseMean	log2FoldChange	lfcSE	stat	pvalue	padj	hgnc_symbol	tissue1	tissue2
ensembl_gene_id	baseMean	log2FoldChange	lfcSE	stat	pvalue	padj	hgnc_symbol	tissue1	tissue2
ensembl_gene_id	baseMean	log2FoldChange	lfcSE	stat	pvalue	padj	hgnc_symbol	tissue1	tissue2
ensembl_gene_id	baseMean	log2FoldChange	lfcSE	stat	pvalue	padj	hgnc_symbol	tissue1	tissue2
ensembl_gene_id	baseMean	log2FoldChange	lfcSE	stat	pvalue	padj	hgnc_symbol	tissue1	tissue2
ensembl_gene_id	baseMean	log2FoldChange	lfcSE	stat	pvalue	padj	hgnc_symbol	tissue1	tissue2
ensembl_gene_id	baseMean	log2FoldChange	lfcSE	stat	pvalue	padj	hgnc_symbol	tissue1	tissue2
ensembl_gene_id	baseMean	log2FoldChange	lfcSE	stat	pvalue	padj	hgnc_symbol	tissue1	tissue2
ensembl_gene_id	baseMean	log2FoldChange	lfcSE	stat	pvalue	padj	hgnc_symbol	tissue1	tissue2
ensembl_gene_id	baseMean	log2FoldChange	lfcSE	stat	pvalue	padj	hgnc_symbol	tissue1	tissue2
ensembl_gene_id	baseMean	log2FoldChange	lfcSE	stat	pvalue	padj	hgnc_symbol	tissue1	tissue2
ensembl_gene_id	baseMean	log2FoldChange	lfcSE	stat	pvalue	padj	hgnc_symbol	tissue1	tissue2
ensembl_gene_id	baseMean	log2FoldChange	lfcSE	stat	pvalue	padj	hgnc_symbol	tissue1	tissue2
ensembl_gene_id	baseMean	log2FoldChange	lfcSE	stat	pvalue	padj	hgnc_symbol	tissue1	tissue2
ensembl_gene_id	baseMean	log2FoldChange	lfcSE	stat	pvalue	padj	hgnc_symbol	tissue1	tissue2
ensembl_gene_id	baseMean	log2FoldChange	lfcSE	stat	pvalue	padj	hgnc_symbol	tissue1	tissue2
ensembl_gene_id	baseMean	log2FoldChange	lfcSE	stat	pvalue	padj	hgnc_symbol	tissue1	tissue2
ensembl_gene_id	baseMean	log2FoldChange	lfcSE	stat	pvalue	padj	hgnc_symbol	tissue1	tissue2
ensembl_gene_id	baseMean	log2FoldChange	lfcSE	stat	pvalue	padj	hgnc_symbol	tissue1	tissue2
ensembl_gene_id	baseMean	log2FoldChange	lfcSE	stat	pvalue	padj	hgnc_symbol	tissue1	tissue2
ensembl_gene_id	baseMean	log2FoldChange	lfcSE	stat	pvalue	padj	hgnc_symbol	tissue1	tissue2
ensembl_gene_id	baseMean	log2FoldChange	lfcSE	stat	pvalue	padj	hgnc_symbol	tissue1	tissue2
ensembl_gene_id	baseMean	log2FoldChange	lfcSE	stat	pvalue	padj	hgnc_symbol	tissue1	tissue2
ensembl_gene_id	baseMean	log2FoldChange	lfcSE	stat	pvalue	padj	hgnc_symbol	tissue1	tissue2
ensembl_gene_id	baseMean	log2FoldChange	lfcSE	stat	pvalue	padj	hgnc_symbol	tissue1	tissue2
ensembl_gene_id	baseMean	log2FoldChange	lfcSE	stat	pvalue	padj	hgnc_symbol	tissue1	tissue2
ensembl_gene_id	baseMean	log2FoldChange	lfcSE	stat	pvalue	padj	hgnc_symbol	tissue1	tissue2
ensembl_gene_id	baseMean	log2FoldChange	lfcSE	stat	pvalue	padj	hgnc_symbol	tissue1	tissue2
ensembl_gene_id	baseMean	log2FoldChange	lfcSE	stat	pvalue	padj	hgnc_symbol	tissue1	tissue2
ensembl_gene_id	baseMean	log2FoldChange	lfcSE	stat	pvalue	padj	hgnc_symbol	tissue1	tissue2
ensembl_gene_id	baseMean	log2FoldChange	lfcSE	stat	pvalue	padj	hgnc_symbol	tissue1	tissue2
ensembl_gene_id	baseMean	log2FoldChange	lfcSE	stat	pvalue	padj	hgnc_symbol	tissue1	tissue2
ensembl_gene_id	baseMean	log2FoldChange	lfcSE	stat	pvalue	padj	hgnc_symbol	tissue1	tissue2
ensembl_gene_id	baseMean	log2FoldChange	lfcSE	stat	pvalue	padj	hgnc_symbol	tissue1	tissue2
ensembl_gene_id	baseMean	log2FoldChange	lfcSE	stat	pvalue	padj	hgnc_symbol	tissue1	tissue2
ensembl_gene_id	baseMean	log2FoldChange	lfcSE	stat	pvalue	padj	hgnc_symbol	tissue1	tissue2
ensembl_gene_id	baseMean	log2FoldChange	lfcSE	stat	pvalue	padj	hgnc_symbol	tissue1	tissue2
ensembl_gene_id	baseMean	log2FoldChange	lfcSE	stat	pvalue	padj	hgnc_symbol	tissue1	tissue2
ensembl_gene_id	baseMean	log2FoldChange	lfcSE	stat	pvalue	padj	hgnc_symbol	tissue1	tissue2
ensembl_gene_id	baseMean	log2FoldChange	lfcSE	stat	pvalue	padj	hgnc_symbol	tissue1	tissue2
ensembl_gene_id	baseMean	log2FoldChange	lfcSE	stat	pvalue	padj	hgnc_symbol	tissue1	tissue2
ensembl_gene_id	baseMean	log2FoldChange	lfcSE	stat	pvalue	padj	hgnc_symbol	tissue1	tissue2
ensembl_gene_id	baseMean	log2FoldChange	lfcSE	stat	pvalue	padj	hgnc_symbol	tissue1	tissue2
ensembl_gene_id	baseMean	log2FoldChange	lfcSE	stat	pvalue	padj	hgnc_symbol	tissue1	tissue2
ensembl_gene_id	baseMean	log2FoldChange	lfcSE	stat	pvalue	padj	hgnc_symbol	tissue1	tissue2
ensembl_gene_id	baseMean	log2FoldChange	lfcSE	stat	pvalue	padj	hgnc_symbol	tissue1	tissue2
ensembl_gene_id	baseMean	log2FoldChange	lfcSE	stat	pvalue	padj	hgnc_symbol	tissue1	tissue2
ensembl_gene_id	baseMean	log2FoldChange	lfcSE	stat	pvalue	padj	hgnc_symbol	tissue1	tissue2
ensembl_gene_id	baseMean	log2FoldChange	lfcSE	stat	pvalue	padj	hgnc_symbol	tissue1	tissue2
ensembl_gene_id	baseMean	log2FoldChange	lfcSE	stat	pvalue	padj	hgnc_symbol	tissue1	tissue2
ensembl_gene_id	baseMean	log2FoldChange	lfcSE	stat	pvalue	padj	hgnc_symbol	tissue1	tissue2
ensembl_gene_id	baseMean	log2FoldChange	lfcSE	stat	pvalue	padj	hgnc_symbol	tissue1	tissue2
ensembl_gene_id	baseMean	log2FoldChange	lfcSE	stat	pvalue	padj	hgnc_symbol	tissue1	tissue2
ensembl_gene_id	baseMean	log2FoldChange	lfcSE	stat	pvalue	padj	hgnc_symbol	tissue1	tissue2
ensembl_gene_id	baseMean	log2FoldChange	lfcSE	stat	pvalue	padj	hgnc_symbol	tissue1	tissue2
ensembl_gene_id	baseMean	log2FoldChange	lfcSE	stat	pvalue	padj	hgnc_symbol	tissue1	tissue2
ensembl_gene_id	baseMean	log2FoldChange	lfcSE	stat	pvalue	padj	hgnc_symbol	tissue1	tissue2
ensembl_gene_id	baseMean	log2FoldChange	lfcSE	stat	pvalue	padj	hgnc_symbol	tissue1	tissue2
ensembl_gene_id	baseMean	log2FoldChange	lfcSE	stat	pvalue	padj	hgnc_symbol	tissue1	tissue2
ensembl_gene_id	baseMean	log2FoldChange	lfcSE	stat	pvalue	padj	hgnc_symbol	tissue1	tissue2
ensembl_gene_id	baseMean	log2FoldChange	lfcSE	stat	pvalue	padj	hgnc_symbol	tissue1	tissue2
ensembl_gene_id	baseMean	log2FoldChange	lfcSE	stat	pvalue	padj	hgnc_symbol	tissue1	tissue2
ensembl_gene_id	baseMean	log2FoldChange	lfcSE	stat	pvalue	padj	hgnc_symbol	tissue1	tissue2
ensembl_gene_id	baseMean	log2FoldChange	lfcSE	stat	pvalue	padj	hgnc_symbol	tissue1	tissue2
ensembl_gene_id	baseMean	log2FoldChange	lfcSE	stat	pvalue	padj	hgnc_symbol	tissue1	tissue2
ensembl_gene_id	baseMean	log2FoldChange	lfcSE	stat	pvalue	padj	hgnc_symbol	tissue1	tissue2
ensembl_gene_id	baseMean	log2FoldChange	lfcSE	stat	pvalue	padj	hgnc_symbol	tissue1	tissue2
ensembl_gene_id	baseMean	log2FoldChange	lfcSE	stat	pvalue	padj	hgnc_symbol	tissue1	tissue2
ensembl_gene_id	baseMean	log2FoldChange	lfcSE	stat	pvalue	padj	hgnc_symbol	tissue1	tissue2
ensembl_gene_id	baseMean	log2FoldChange	lfcSE	stat	pvalue	padj	hgnc_symbol	tissue1	tissue2
ensembl_gene_id	baseMean	log2FoldChange	lfcSE	stat	pvalue	padj	hgnc_symbol	tissue1	tissue2
ensembl_gene_id	baseMean	log2FoldChange	lfcSE	stat	pvalue	padj	hgnc_symbol	tissue1	tissue2
ensembl_gene_id	baseMean	log2FoldChange	lfcSE	stat	pvalue	padj	hgnc_symbol	tissue1	tissue2
ensembl_gene_id	baseMean	log2FoldChange	lfcSE	stat	pvalue	padj	hgnc_symbol	tissue1	tissue2
ensembl_gene_id	baseMean	log2FoldChange	lfcSE	stat	pvalue	padj	hgnc_symbol	tissue1	tissue2
ensembl_gene_id	baseMean	log2FoldChange	lfcSE	stat	pvalue	padj	hgnc_symbol	tissue1	tissue2
ensembl_gene_id	baseMean	log2FoldChange	lfcSE	stat	pvalue	padj	hgnc_symbol	tissue1	tissue2
ensembl_gene_id	baseMean	log2FoldChange	lfcSE	stat	pvalue	padj	hgnc_symbol	tissue1	tissue2
ensembl_gene_id	baseMean	log2FoldChange	lfcSE	stat	pvalue	padj	hgnc_symbol	tissue1	tissue2
ensembl_gene_id	baseMean	log2FoldChange	lfcSE	stat	pvalue	padj	hgnc_symbol	tissue1	tissue2
ensembl_gene_id	baseMean	log2FoldChange	lfcSE	stat	pvalue	padj	hgnc_symbol	tissue1	tissue2
ensembl_gene_id	baseMean	log2FoldChange	lfcSE	stat	pvalue	padj	hgnc_symbol	tissue1	tissue2
ensembl_gene_id	baseMean	log2FoldChange	lfcSE	stat	pvalue	padj	hgnc_symbol	tissue1	tissue2
ensembl_gene_id	baseMean	log2FoldChange	lfcSE	stat	pvalue	padj	hgnc_symbol	tissue1	tissue2
ensembl_gene_id	baseMean	log2FoldChange	lfcSE	stat	pvalue	padj	hgnc_symbol	tissue1	tissue2
ensembl_gene_id	baseMean	log2FoldChange	lfcSE	stat	pvalue	padj	hgnc_symbol	tissue1	tissue2
ensembl_gene_id	baseMean	log2FoldChange	lfcSE	stat	pvalue	padj	hgnc_symbol	tissue1	tissue2
ensembl_gene_id	baseMean	log2FoldChange	lfcSE	stat	pvalue	padj	hgnc_symbol	tissue1	tissue2
ensembl_gene_id	baseMean	log2FoldChange	lfcSE	stat	pvalue	padj	hgnc_symbol	tissue1	tissue2
ensembl_gene_id	baseMean	log2FoldChange	lfcSE	stat	pvalue	padj	hgnc_symbol	tissue1	tissue2
ensembl_gene_id	baseMean	log2FoldChange	lfcSE	stat	pvalue	padj	hgnc_symbol	tissue1	tissue2
ensembl_gene_id	baseMean	log2FoldChange	lfcSE	stat	pvalue	padj	hgnc_symbol	tissue1	tissue2
ensembl_gene_id	baseMean	log2FoldChange	lfcSE	stat	pvalue	padj	hgnc_symbol	tissue1	tissue2
ensembl_gene_id	baseMean	log2FoldChange	lfcSE	stat	pvalue	padj	hgnc_symbol	tissue1	tissue2
ensembl_gene_id	baseMean	log2FoldChange	lfcSE	stat	pvalue	padj	hgnc_symbol	tissue1	tissue2
ensembl_gene_id	baseMean	log2FoldChange	lfcSE	stat	pvalue	padj	hgnc_symbol	tissue1	tissue2
ensembl_gene_id	baseMean	log2FoldChange	lfcSE	stat	pvalue	padj	hgnc_symbol	tissue1	tissue2
ensembl_gene_id	baseMean	log2FoldChange	lfcSE	stat	pvalue	padj	hgnc_symbol	tissue1	tissue2
ensembl_gene_id	baseMean	log2FoldChange	lfcSE	stat	pvalue	padj	hgnc_symbol	tissue1	tissue2
ensembl_gene_id	baseMean	log2FoldChange	lfcSE	stat	pvalue	padj	hgnc_symbol	tissue1	tissue2
ensembl_gene_id	baseMean	log2FoldChange	lfcSE	stat	pvalue	padj	hgnc_symbol	tissue1	tissue2
ensembl_gene_id	baseMean	log2FoldChange	lfcSE	stat	pvalue	padj	hgnc_symbol	tissue1	tissue2
ensembl_gene_id	baseMean	log2FoldChange	lfcSE	stat	pvalue	padj	hgnc_symbol	tissue1	tissue2
ensembl_gene_id	baseMean	log2FoldChange	lfcSE	stat	pvalue	padj	hgnc_symbol	tissue1	tissue2
ensembl_gene_id	baseMean	log2FoldChange	lfcSE	stat	pvalue	padj	hgnc_symbol	tissue1	tissue2
ensembl_gene_id	baseMean	log2FoldChange	lfcSE	stat	pvalue	padj	hgnc_symbol	tissue1	tissue2
ensembl_gene_id	baseMean	log2FoldChange	lfcSE	stat	pvalue	padj	hgnc_symbol	tissue1	tissue2
ensembl_gene_id	baseMean	log2FoldChange	lfcSE	stat	pvalue	padj	hgnc_symbol	tissue1	tissue2
ensembl_gene_id	baseMean	log2FoldChange	lfcSE	stat	pvalue	padj	hgnc_symbol	tissue1	tissue2
ensembl_gene_id	baseMean	log2FoldChange	lfcSE	stat	pvalue	padj	hgnc_symbol	tissue1	tissue2
ensembl_gene_id	baseMean	log2FoldChange	lfcSE	stat	pvalue	padj	hgnc_symbol	tissue1	tissue2
ensembl_gene_id	baseMean	log2FoldChange	lfcSE	stat	pvalue	padj	hgnc_symbol	tissue1	tissue2
ensembl_gene_id	baseMean	log2FoldChange	lfcSE	stat	pvalue	padj	hgnc_symbol	tissue1	tissue2
ensembl_gene_id	baseMean	log2FoldChange	lfcSE	stat	pvalue	padj	hgnc_symbol	tissue1	tissue2
ensembl_gene_id	baseMean	log2FoldChange	lfcSE	stat	pvalue	padj	hgnc_symbol	tissue1	tissue2
ensembl_gene_id	baseMean	log2FoldChange	lfcSE	stat	pvalue	padj	hgnc_symbol	tissue1	tissue2
ensembl_gene_id	baseMean	log2FoldChange	lfcSE	stat	pvalue	padj	hgnc_symbol	tissue1	tissue2
ensembl_gene_id	baseMean	log2FoldChange	lfcSE	stat	pvalue	padj	hgnc_symbol	tissue1	tissue2
ensembl_gene_id	baseMean	log2FoldChange	lfcSE	stat	pvalue	padj	hgnc_symbol	tissue1	tissue2
ensembl_gene_id	baseMean	log2FoldChange	lfcSE	stat	pvalue	padj	hgnc_symbol	tissue1	tissue2
ensembl_gene_id	baseMean	log2FoldChange	lfcSE	stat	pvalue	padj	hgnc_symbol	tissue1	tissue2
ensembl_gene_id	baseMean	log2FoldChange	lfcSE	stat	pvalue	padj	hgnc_symbol	tissue1	tissue2
ensembl_gene_id	baseMean	log2FoldChange	lfcSE	stat	pvalue	padj	hgnc_symbol	tissue1	tissue2
ensembl_gene_id	baseMean	log2FoldChange	lfcSE	stat	pvalue	padj	hgnc_symbol	tissue1	tissue2
ensembl_gene_id	baseMean	log2FoldChange	lfcSE	stat	pvalue	padj	hgnc_symbol	tissue1	tissue2
ensembl_gene_id	baseMean	log2FoldChange	lfcSE	stat	pvalue	padj	hgnc_symbol	tissue1	tissue2
ensembl_gene_id	baseMean	log2FoldChange	lfcSE	stat	pvalue	padj	hgnc_symbol	tissue1	tissue2
ensembl_gene_id	baseMean	log2FoldChange	lfcSE	stat	pvalue	padj	hgnc_symbol	tissue1	tissue2
ensembl_gene_id	baseMean	log2FoldChange	lfcSE	stat	pvalue	padj	hgnc_symbol	tissue1	tissue2
ensembl_gene_id	baseMean	log2FoldChange	lfcSE	stat	pvalue	padj	hgnc_symbol	tissue1	tissue2
ensembl_gene_id	baseMean	log2FoldChange	lfcSE	stat	pvalue	padj	hgnc_symbol	tissue1	tissue2
ensembl_gene_id	baseMean	log2FoldChange	lfcSE	stat	pvalue	padj	hgnc_symbol	tissue1	tissue2
ensembl_gene_id	baseMean	log2FoldChange	lfcSE	stat	pvalue	padj	hgnc_symbol	tissue1	tissue2
ensembl_gene_id	baseMean	log2FoldChange	lfcSE	stat	pvalue	padj	hgnc_symbol	tissue1	tissue2
ensembl_gene_id	baseMean	log2FoldChange	lfcSE	stat	pvalue	padj	hgnc_symbol	tissue1	tissue2
ensembl_gene_id	baseMean	log2FoldChange	lfcSE	stat	pvalue	padj	hgnc_symbol	tissue1	tissue2
ensembl_gene_id	baseMean	log2FoldChange	lfcSE	stat	pvalue	padj	hgnc_symbol	tissue1	tissue2
ensembl_gene_id	baseMean	log2FoldChange	lfcSE	stat	pvalue	padj	hgnc_symbol	tissue1	tissue2
ensembl_gene_id	baseMean	log2FoldChange	lfcSE	stat	pvalue	padj	hgnc_symbol	tissue1	tissue2
ensembl_gene_id	baseMean	log2FoldChange	lfcSE	stat	pvalue	padj	hgnc_symbol	tissue1	tissue2
ensembl_gene_id	baseMean	log2FoldChange	lfcSE	stat	pvalue	padj	hgnc_symbol	tissue1	tissue2
ensembl_gene_id	baseMean	log2FoldChange	lfcSE	stat	pvalue	padj	hgnc_symbol	tissue1	tissue2
ensembl_gene_id	baseMean	log2FoldChange	lfcSE	stat	pvalue	padj	hgnc_symbol	tissue1	tissue2
ensembl_gene_id	baseMean	log2FoldChange	lfcSE	stat	pvalue	padj	hgnc_symbol	tissue1	tissue2
ensembl_gene_id	baseMean	log2FoldChange	lfcSE	stat	pvalue	padj	hgnc_symbol	tissue1	tissue2
ensembl_gene_id	baseMean	log2FoldChange	lfcSE	stat	pvalue	padj	hgnc_symbol	tissue1	tissue2
ensembl_gene_id	baseMean	log2FoldChange	lfcSE	stat	pvalue	padj	hgnc_symbol	tissue1	tissue2
ensembl_gene_id	baseMean	log2FoldChange	lfcSE	stat	pvalue	padj	hgnc_symbol	tissue1	tissue2
ensembl_gene_id	baseMean	log2FoldChange	lfcSE	stat	pvalue	padj	hgnc_symbol	tissue1	tissue2
ensembl_gene_id	baseMean	log2FoldChange	lfcSE	stat	pvalue	padj	hgnc_symbol	tissue1	tissue2
ensembl_gene_id	baseMean	log2FoldChange	lfcSE	stat	pvalue	padj	hgnc_symbol	tissue1	tissue2
ensembl_gene_id	baseMean	log2FoldChange	lfcSE	stat	pvalue	padj	hgnc_symbol	tissue1	tissue2
ensembl_gene_id	baseMean	log2FoldChange	lfcSE	stat	pvalue	padj	hgnc_symbol	tissue1	tissue2
ensembl_gene_id	baseMean	log2FoldChange	lfcSE	stat	pvalue	padj	hgnc_symbol	tissue1	tissue2
ensembl_gene_id	baseMean	log2FoldChange	lfcSE	stat	pvalue	padj	hgnc_symbol	tissue1	tissue2
ensembl_gene_id	baseMean	log2FoldChange	lfcSE	stat	pvalue	padj	hgnc_symbol	tissue1	tissue2
ensembl_gene_id	baseMean	log2FoldChange	lfcSE	stat	pvalue	padj	hgnc_symbol	tissue1	tissue2
ensembl_gene_id	baseMean	log2FoldChange	lfcSE	stat	pvalue	padj	hgnc_symbol	tissue1	tissue2
ensembl_gene_id	baseMean	log2FoldChange	lfcSE	stat	pvalue	padj	hgnc_symbol	tissue1	tissue2
ensembl_gene_id	baseMean	log2FoldChange	lfcSE	stat	pvalue	padj	hgnc_symbol	tissue1	tissue2
ensembl_gene_id	baseMean	log2FoldChange	lfcSE	stat	pvalue	padj	hgnc_symbol	tissue1	tissue2
ensembl_gene_id	baseMean	log2FoldChange	lfcSE	stat	pvalue	padj	hgnc_symbol	tissue1	tissue2
ensembl_gene_id	baseMean	log2FoldChange	lfcSE	stat	pvalue	padj	hgnc_symbol	tissue1	tissue2
ensembl_gene_id	baseMean	log2FoldChange	lfcSE	stat	pvalue	padj	hgnc_symbol	tissue1	tissue2
ensembl_gene_id	baseMean	log2FoldChange	lfcSE	stat	pvalue	padj	hgnc_symbol	tissue1	tissue2
ensembl_gene_id	baseMean	log2FoldChange	lfcSE	stat	pvalue	padj	hgnc_symbol	tissue1	tissue2
ensembl_gene_id	baseMean	log2FoldChange	lfcSE	stat	pvalue	padj	hgnc_symbol	tissue1	tissue2
ensembl_gene_id	baseMean	log2FoldChange	lfcSE	stat	pvalue	padj	hgnc_symbol	tissue1	tissue2
ensembl_gene_id	baseMean	log2FoldChange	lfcSE	stat	pvalue	padj	hgnc_symbol	tissue1	tissue2
ensembl_gene_id	baseMean	log2FoldChange	lfcSE	stat	pvalue	padj	hgnc_symbol	tissue1	tissue2
ensembl_gene_id	baseMean	log2FoldChange	lfcSE	stat	pvalue	padj	hgnc_symbol	tissue1	tissue2
ensembl_gene_id	baseMean	log2FoldChange	lfcSE	stat	pvalue	padj	hgnc_symbol	tissue1	tissue2
ensembl_gene_id	baseMean	log2FoldChange	lfcSE	stat	pvalue	padj	hgnc_symbol	tissue1	tissue2
ensembl_gene_id	baseMean	log2FoldChange	lfcSE	stat	pvalue	padj	hgnc_symbol	tissue1	tissue2
ensembl_gene_id	baseMean	log2FoldChange	lfcSE	stat	pvalue	padj	hgnc_symbol	tissue1	tissue2
ensembl_gene_id	baseMean	log2FoldChange	lfcSE	stat	pvalue	padj	hgnc_symbol	tissue1	tissue2
ensembl_gene_id	baseMean	log2FoldChange	lfcSE	stat	pvalue	padj	hgnc_symbol	tissue1	tissue2
ensembl_gene_id	baseMean	log2FoldChange	lfcSE	stat	pvalue	padj	hgnc_symbol	tissue1	tissue2
ensembl_gene_id	baseMean	log2FoldChange	lfcSE	stat	pvalue	padj	hgnc_symbol	tissue1	tissue2
ensembl_gene_id	baseMean	log2FoldChange	lfcSE	stat	pvalue	padj	hgnc_symbol	tissue1	tissue2
ensembl_gene_id	baseMean	log2FoldChange	lfcSE	stat	pvalue	padj	hgnc_symbol	tissue1	tissue2
ensembl_gene_id	baseMean	log2FoldChange	lfcSE	stat	pvalue	padj	hgnc_symbol	tissue1	tissue2
ensembl_gene_id	baseMean	log2FoldChange	lfcSE	stat	pvalue	padj	hgnc_symbol	tissue1	tissue2
ensembl_gene_id	baseMean	log2FoldChange	lfcSE	stat	pvalue	padj	hgnc_symbol	tissue1	tissue2
ensembl_gene_id	baseMean	log2FoldChange	lfcSE	stat	pvalue	padj	hgnc_symbol	tissue1	tissue2
ensembl_gene_id	baseMean	log2FoldChange	lfcSE	stat	pvalue	padj	hgnc_symbol	tissue1	tissue2
ensembl_gene_id	baseMean	log2FoldChange	lfcSE	stat	pvalue	padj	hgnc_symbol	tissue1	tissue2
ensembl_gene_id	baseMean	log2FoldChange	lfcSE	stat	pvalue	padj	hgnc_symbol	tissue1	tissue2
ensembl_gene_id	baseMean	log2FoldChange	lfcSE	stat	pvalue	padj	hgnc_symbol	tissue1	tissue2
ensembl_gene_id	baseMean	log2FoldChange	lfcSE	stat	pvalue	padj	hgnc_symbol	tissue1	tissue2
ensembl_gene_id	baseMean	log2FoldChange	lfcSE	stat	pvalue	padj	hgnc_symbol	tissue1	tissue2
ensembl_gene_id	baseMean	log2FoldChange	lfcSE	stat	pvalue	padj	hgnc_symbol	tissue1	tissue2
ensembl_gene_id	baseMean	log2FoldChange	lfcSE	stat	pvalue	padj	hgnc_symbol	tissue1	tissue2
ensembl_gene_id	baseMean	log2FoldChange	lfcSE	stat	pvalue	padj	hgnc_symbol	tissue1	tissue2
ensembl_gene_id	baseMean	log2FoldChange	lfcSE	stat	pvalue	padj	hgnc_symbol	tissue1	tissue2
ensembl_gene_id	baseMean	log2FoldChange	lfcSE	stat	pvalue	padj	hgnc_symbol	tissue1	tissue2
ensembl_gene_id	baseMean	log2FoldChange	lfcSE	stat	pvalue	padj	hgnc_symbol	tissue1	tissue2
ensembl_gene_id	baseMean	log2FoldChange	lfcSE	stat	pvalue	padj	hgnc_symbol	tissue1	tissue2
ensembl_gene_id	baseMean	log2FoldChange	lfcSE	stat	pvalue	padj	hgnc_symbol	tissue1	tissue2
ensembl_gene_id	baseMean	log2FoldChange	lfcSE	stat	pvalue	padj	hgnc_symbol	tissue1	tissue2
ensembl_gene_id	baseMean	log2FoldChange	lfcSE	stat	pvalue	padj	hgnc_symbol	tissue1	tissue2
ensembl_gene_id	baseMean	log2FoldChange	lfcSE	stat	pvalue	padj	hgnc_symbol	tissue1	tissue2
ensembl_gene_id	baseMean	log2FoldChange	lfcSE	stat	pvalue	padj	hgnc_symbol	tissue1	tissue2
ensembl_gene_id	baseMean	log2FoldChange	lfcSE	stat	pvalue	padj	hgnc_symbol	tissue1	tissue2
ensembl_gene_id	baseMean	log2FoldChange	lfcSE	stat	pvalue	padj	hgnc_symbol	tissue1	tissue2
ensembl_gene_id	baseMean	log2FoldChange	lfcSE	stat	pvalue	padj	hgnc_symbol	tissue1	tissue2
ensembl_gene_id	baseMean	log2FoldChange	lfcSE	stat	pvalue	padj	hgnc_symbol	tissue1	tissue2
ensembl_gene_id	baseMean	log2FoldChange	lfcSE	stat	pvalue	padj	hgnc_symbol	tissue1	tissue2
ensembl_gene_id	baseMean	log2FoldChange	lfcSE	stat	pvalue	padj	hgnc_symbol	tissue1	tissue2
ensembl_gene_id	baseMean	log2FoldChange	lfcSE	stat	pvalue	padj	hgnc_symbol	tissue1	tissue2
ensembl_gene_id	baseMean	log2FoldChange	lfcSE	stat	pvalue	padj	hgnc_symbol	tissue1	tissue2
ensembl_gene_id	baseMean	log2FoldChange	lfcSE	stat	pvalue	padj	hgnc_symbol	tissue1	tissue2
ensembl_gene_id	baseMean	log2FoldChange	lfcSE	stat	pvalue	padj	hgnc_symbol	tissue1	tissue2
ensembl_gene_id	baseMean	log2FoldChange	lfcSE	stat	pvalue	padj	hgnc_symbol	tissue1	tissue2
ensembl_gene_id	baseMean	log2FoldChange	lfcSE	stat	pvalue	padj	hgnc_symbol	tissue1	tissue2
ensembl_gene_id	baseMean	log2FoldChange	lfcSE	stat	pvalue	padj	hgnc_symbol	tissue1	tissue2
ensembl_gene_id	baseMean	log2FoldChange	lfcSE	stat	pvalue	padj	hgnc_symbol	tissue1	tissue2
ensembl_gene_id	baseMean	log2FoldChange	lfcSE	stat	pvalue	padj	hgnc_symbol	tissue1	tissue2
ensembl_gene_id	baseMean	log2FoldChange	lfcSE	stat	pvalue	padj	hgnc_symbol	tissue1	tissue2
ensembl_gene_id	baseMean	log2FoldChange	lfcSE	stat	pvalue	padj	hgnc_symbol	tissue1	tissue2
ensembl_gene_id	baseMean	log2FoldChange	lfcSE	stat	pvalue	padj	hgnc_symbol	tissue1	tissue2
ensembl_gene_id	baseMean	log2FoldChange	lfcSE	stat	pvalue	padj	hgnc_symbol	tissue1	tissue2
ensembl_gene_id	baseMean	log2FoldChange	lfcSE	stat	pvalue	padj	hgnc_symbol	tissue1	tissue2
ensembl_gene_id	baseMean	log2FoldChange	lfcSE	stat	pvalue	padj	hgnc_symbol	tissue1	tissue2
ensembl_gene_id	baseMean	log2FoldChange	lfcSE	stat	pvalue	padj	hgnc_symbol	tissue1	tissue2
ensembl_gene_id	baseMean	log2FoldChange	lfcSE	stat	pvalue	padj	hgnc_symbol	tissue1	tissue2
ensembl_gene_id	baseMean	log2FoldChange	lfcSE	stat	pvalue	padj	hgnc_symbol	tissue1	tissue2
ensembl_gene_id	baseMean	log2FoldChange	lfcSE	stat	pvalue	padj	hgnc_symbol	tissue1	tissue2
ensembl_gene_id	baseMean	log2FoldChange	lfcSE	stat	pvalue	padj	hgnc_symbol	tissue1	tissue2
ensembl_gene_id	baseMean	log2FoldChange	lfcSE	stat	pvalue	padj	hgnc_symbol	tissue1	tissue2
ensembl_gene_id	baseMean	log2FoldChange	lfcSE	stat	pvalue	padj	hgnc_symbol	tissue1	tissue2
ensembl_gene_id	baseMean	log2FoldChange	lfcSE	stat	pvalue	padj	hgnc_symbol	tissue1	tissue2
ensembl_gene_id	baseMean	log2FoldChange	lfcSE	stat	pvalue	padj	hgnc_symbol	tissue1	tissue2
ensembl_gene_id	baseMean	log2FoldChange	lfcSE	stat	pvalue	padj	hgnc_symbol	tissue1	tissue2
ensembl_gene_id	baseMean	log2FoldChange	lfcSE	stat	pvalue	padj	hgnc_symbol	tissue1	tissue2
ensembl_gene_id	baseMean	log2FoldChange	lfcSE	stat	pvalue	padj	hgnc_symbol	tissue1	tissue2
ensembl_gene_id	baseMean	log2FoldChange	lfcSE	stat	pvalue	padj	hgnc_symbol	tissue1	tissue2
ensembl_gene_id	baseMean	log2FoldChange	lfcSE	stat	pvalue	padj	hgnc_symbol	tissue1	tissue2
ensembl_gene_id	baseMean	log2FoldChange	lfcSE	stat	pvalue	padj	hgnc_symbol	tissue1	tissue2
ensembl_gene_id	baseMean	log2FoldChange	lfcSE	stat	pvalue	padj	hgnc_symbol	tissue1	tissue2
ensembl_gene_id	baseMean	log2FoldChange	lfcSE	stat	pvalue	padj	hgnc_symbol	tissue1	tissue2
ensembl_gene_id	baseMean	log2FoldChange	lfcSE	stat	pvalue	padj	hgnc_symbol	tissue1	tissue2
ensembl_gene_id	baseMean	log2FoldChange	lfcSE	stat	pvalue	padj	hgnc_symbol	tissue1	tissue2
ensembl_gene_id	baseMean	log2FoldChange	lfcSE	stat	pvalue	padj	hgnc_symbol	tissue1	tissue2
ensembl_gene_id	baseMean	log2FoldChange	lfcSE	stat	pvalue	padj	hgnc_symbol	tissue1	tissue2
ensembl_gene_id	baseMean	log2FoldChange	lfcSE	stat	pvalue	padj	hgnc_symbol	tissue1	tissue2
ensembl_gene_id	baseMean	log2FoldChange	lfcSE	stat	pvalue	padj	hgnc_symbol	tissue1	tissue2
ensembl_gene_id	baseMean	log2FoldChange	lfcSE	stat	pvalue	padj	hgnc_symbol	tissue1	tissue2
ensembl_gene_id	baseMean	log2FoldChange	lfcSE	stat	pvalue	padj	hgnc_symbol	tissue1	tissue2
ensembl_gene_id	baseMean	log2FoldChange	lfcSE	stat	pvalue	padj	hgnc_symbol	tissue1	tissue2
ensembl_gene_id	baseMean	log2FoldChange	lfcSE	stat	pvalue	padj	hgnc_symbol	tissue1	tissue2
ensembl_gene_id	baseMean	log2FoldChange	lfcSE	stat	pvalue	padj	hgnc_symbol	tissue1	tissue2
ensembl_gene_id	baseMean	log2FoldChange	lfcSE	stat	pvalue	padj	hgnc_symbol	tissue1	tissue2
ensembl_gene_id	baseMean	log2FoldChange	lfcSE	stat	pvalue	padj	hgnc_symbol	tissue1	tissue2
ensembl_gene_id	baseMean	log2FoldChange	lfcSE	stat	pvalue	padj	hgnc_symbol	tissue1	tissue2
ensembl_gene_id	baseMean	log2FoldChange	lfcSE	stat	pvalue	padj	hgnc_symbol	tissue1	tissue2
ensembl_gene_id	baseMean	log2FoldChange	lfcSE	stat	pvalue	padj	hgnc_symbol	tissue1	tissue2
ensembl_gene_id	baseMean	log2FoldChange	lfcSE	stat	pvalue	padj	hgnc_symbol	tissue1	tissue2
ensembl_gene_id	baseMean	log2FoldChange	lfcSE	stat	pvalue	padj	hgnc_symbol	tissue1	tissue2
ensembl_gene_id	baseMean	log2FoldChange	lfcSE	stat	pvalue	padj	hgnc_symbol	tissue1	tissue2
ensembl_gene_id	baseMean	log2FoldChange	lfcSE	stat	pvalue	padj	hgnc_symbol	tissue1	tissue2
ensembl_gene_id	baseMean	log2FoldChange	lfcSE	stat	pvalue	padj	hgnc_symbol	tissue1	tissue2
ensembl_gene_id	baseMean	log2FoldChange	lfcSE	stat	pvalue	padj	hgnc_symbol	tissue1	tissue2
ensembl_gene_id	baseMean	log2FoldChange	lfcSE	stat	pvalue	padj	hgnc_symbol	tissue1	tissue2
ensembl_gene_id	baseMean	log2FoldChange	lfcSE	stat	pvalue	padj	hgnc_symbol	tissue1	tissue2
ensembl_gene_id	baseMean	log2FoldChange	lfcSE	stat	pvalue	padj	hgnc_symbol	tissue1	tissue2
ensembl_gene_id	baseMean	log2FoldChange	lfcSE	stat	pvalue	padj	hgnc_symbol	tissue1	tissue2
ensembl_gene_id	baseMean	log2FoldChange	lfcSE	stat	pvalue	padj	hgnc_symbol	tissue1	tissue2
ensembl_gene_id	baseMean	log2FoldChange	lfcSE	stat	pvalue	padj	hgnc_symbol	tissue1	tissue2
ensembl_gene_id	baseMean	log2FoldChange	lfcSE	stat	pvalue	padj	hgnc_symbol	tissue1	tissue2
ensembl_gene_id	baseMean	log2FoldChange	lfcSE	stat	pvalue	padj	hgnc_symbol	tissue1	tissue2
ensembl_gene_id	baseMean	log2FoldChange	lfcSE	stat	pvalue	padj	hgnc_symbol	tissue1	tissue2
ensembl_gene_id	baseMean	log2FoldChange	lfcSE	stat	pvalue	padj	hgnc_symbol	tissue1	tissue2
ensembl_gene_id	baseMean	log2FoldChange	lfcSE	stat	pvalue	padj	hgnc_symbol	tissue1	tissue2
ensembl_gene_id	baseMean	log2FoldChange	lfcSE	stat	pvalue	padj	hgnc_symbol	tissue1	tissue2
ensembl_gene_id	baseMean	log2FoldChange	lfcSE	stat	pvalue	padj	hgnc_symbol	tissue1	tissue2
ensembl_gene_id	baseMean	log2FoldChange	lfcSE	stat	pvalue	padj	hgnc_symbol	tissue1	tissue2
ensembl_gene_id	baseMean	log2FoldChange	lfcSE	stat	pvalue	padj	hgnc_symbol	tissue1	tissue2
ensembl_gene_id	baseMean	log2FoldChange	lfcSE	stat	pvalue	padj	hgnc_symbol	tissue1	tissue2
ensembl_gene_id	baseMean	log2FoldChange	lfcSE	stat	pvalue	padj	hgnc_symbol	tissue1	tissue2
ensembl_gene_id	baseMean	log2FoldChange	lfcSE	stat	pvalue	padj	hgnc_symbol	tissue1	tissue2
ensembl_gene_id	baseMean	log2FoldChange	lfcSE	stat	pvalue	padj	hgnc_symbol	tissue1	tissue2
ensembl_gene_id	baseMean	log2FoldChange	lfcSE	stat	pvalue	padj	hgnc_symbol	tissue1	tissue2
ensembl_gene_id	baseMean	log2FoldChange	lfcSE	stat	pvalue	padj	hgnc_symbol	tissue1	tissue2
ensembl_gene_id	baseMean	log2FoldChange	lfcSE	stat	pvalue	padj	hgnc_symbol	tissue1	tissue2
ensembl_gene_id	baseMean	log2FoldChange	lfcSE	stat	pvalue	padj	hgnc_symbol	tissue1	tissue2
ensembl_gene_id	baseMean	log2FoldChange	lfcSE	stat	pvalue	padj	hgnc_symbol	tissue1	tissue2
ensembl_gene_id	baseMean	log2FoldChange	lfcSE	stat	pvalue	padj	hgnc_symbol	tissue1	tissue2
ensembl_gene_id	baseMean	log2FoldChange	lfcSE	stat	pvalue	padj	hgnc_symbol	tissue1	tissue2
ensembl_gene_id	baseMean	log2FoldChange	lfcSE	stat	pvalue	padj	hgnc_symbol	tissue1	tissue2
ensembl_gene_id	baseMean	log2FoldChange	lfcSE	stat	pvalue	padj	hgnc_symbol	tissue1	tissue2
ensembl_gene_id	baseMean	log2FoldChange	lfcSE	stat	pvalue	padj	hgnc_symbol	tissue1	tissue2
ensembl_gene_id	baseMean	log2FoldChange	lfcSE	stat	pvalue	padj	hgnc_symbol	tissue1	tissue2
ensembl_gene_id	baseMean	log2FoldChange	lfcSE	stat	pvalue	padj	hgnc_symbol	tissue1	tissue2
ensembl_gene_id	baseMean	log2FoldChange	lfcSE	stat	pvalue	padj	hgnc_symbol	tissue1	tissue2
ensembl_gene_id	baseMean	log2FoldChange	lfcSE	stat	pvalue	padj	hgnc_symbol	tissue1	tissue2
ensembl_gene_id	baseMean	log2FoldChange	lfcSE	stat	pvalue	padj	hgnc_symbol	tissue1	tissue2
ensembl_gene_id	baseMean	log2FoldChange	lfcSE	stat	pvalue	padj	hgnc_symbol	tissue1	tissue2
ensembl_gene_id	baseMean	log2FoldChange	lfcSE	stat	pvalue	padj	hgnc_symbol	tissue1	tissue2
ensembl_gene_id	baseMean	log2FoldChange	lfcSE	stat	pvalue	padj	hgnc_symbol	tissue1	tissue2
ensembl_gene_id	baseMean	log2FoldChange	lfcSE	stat	pvalue	padj	hgnc_symbol	tissue1	tissue2
ensembl_gene_id	baseMean	log2FoldChange	lfcSE	stat	pvalue	padj	hgnc_symbol	tissue1	tissue2
ensembl_gene_id	baseMean	log2FoldChange	lfcSE	stat	pvalue	padj	hgnc_symbol	tissue1	tissue2
ensembl_gene_id	baseMean	log2FoldChange	lfcSE	stat	pvalue	padj	hgnc_symbol	tissue1	tissue2
ensembl_gene_id	baseMean	log2FoldChange	lfcSE	stat	pvalue	padj	hgnc_symbol	tissue1	tissue2
ensembl_gene_id	baseMean	log2FoldChange	lfcSE	stat	pvalue	padj	hgnc_symbol	tissue1	tissue2
ensembl_gene_id	baseMean	log2FoldChange	lfcSE	stat	pvalue	padj	hgnc_symbol	tissue1	tissue2
ensembl_gene_id	baseMean	log2FoldChange	lfcSE	stat	pvalue	padj	hgnc_symbol	tissue1	tissue2
ensembl_gene_id	baseMean	log2FoldChange	lfcSE	stat	pvalue	padj	hgnc_symbol	tissue1	tissue2
ensembl_gene_id	baseMean	log2FoldChange	lfcSE	stat	pvalue	padj	hgnc_symbol	tissue1	tissue2
ensembl_gene_id	baseMean	log2FoldChange	lfcSE	stat	pvalue	padj	hgnc_symbol	tissue1	tissue2
ensembl_gene_id	baseMean	log2FoldChange	lfcSE	stat	pvalue	padj	hgnc_symbol	tissue1	tissue2
ensembl_gene_id	baseMean	log2FoldChange	lfcSE	stat	pvalue	padj	hgnc_symbol	tissue1	tissue2
ensembl_gene_id	baseMean	log2FoldChange	lfcSE	stat	pvalue	padj	hgnc_symbol	tissue1	tissue2
ensembl_gene_id	baseMean	log2FoldChange	lfcSE	stat	pvalue	padj	hgnc_symbol	tissue1	tissue2
ensembl_gene_id	baseMean	log2FoldChange	lfcSE	stat	pvalue	padj	hgnc_symbol	tissue1	tissue2
ensembl_gene_id	baseMean	log2FoldChange	lfcSE	stat	pvalue	padj	hgnc_symbol	tissue1	tissue2
ensembl_gene_id	baseMean	log2FoldChange	lfcSE	stat	pvalue	padj	hgnc_symbol	tissue1	tissue2
ensembl_gene_id	baseMean	log2FoldChange	lfcSE	stat	pvalue	padj	hgnc_symbol	tissue1	tissue2
ensembl_gene_id	baseMean	log2FoldChange	lfcSE	stat	pvalue	padj	hgnc_symbol	tissue1	tissue2
ensembl_gene_id	baseMean	log2FoldChange	lfcSE	stat	pvalue	padj	hgnc_symbol	tissue1	tissue2
ensembl_gene_id	baseMean	log2FoldChange	lfcSE	stat	pvalue	padj	hgnc_symbol	tissue1	tissue2
ensembl_gene_id	baseMean	log2FoldChange	lfcSE	stat	pvalue	padj	hgnc_symbol	tissue1	tissue2
ensembl_gene_id	baseMean	log2FoldChange	lfcSE	stat	pvalue	padj	hgnc_symbol	tissue1	tissue2
ensembl_gene_id	baseMean	log2FoldChange	lfcSE	stat	pvalue	padj	hgnc_symbol	tissue1	tissue2
ensembl_gene_id	baseMean	log2FoldChange	lfcSE	stat	pvalue	padj	hgnc_symbol	tissue1	tissue2
ensembl_gene_id	baseMean	log2FoldChange	lfcSE	stat	pvalue	padj	hgnc_symbol	tissue1	tissue2
ensembl_gene_id	baseMean	log2FoldChange	lfcSE	stat	pvalue	padj	hgnc_symbol	tissue1	tissue2
ensembl_gene_id	baseMean	log2FoldChange	lfcSE	stat	pvalue	padj	hgnc_symbol	tissue1	tissue2
ensembl_gene_id	baseMean	log2FoldChange	lfcSE	stat	pvalue	padj	hgnc_symbol	tissue1	tissue2
ensembl_gene_id	baseMean	log2FoldChange	lfcSE	stat	pvalue	padj	hgnc_symbol	tissue1	tissue2
ensembl_gene_id	baseMean	log2FoldChange	lfcSE	stat	pvalue	padj	hgnc_symbol	tissue1	tissue2
ensembl_gene_id	baseMean	log2FoldChange	lfcSE	stat	pvalue	padj	hgnc_symbol	tissue1	tissue2
ensembl_gene_id	baseMean	log2FoldChange	lfcSE	stat	pvalue	padj	hgnc_symbol	tissue1	tissue2
ensembl_gene_id	baseMean	log2FoldChange	lfcSE	stat	pvalue	padj	hgnc_symbol	tissue1	tissue2
ensembl_gene_id	baseMean	log2FoldChange	lfcSE	stat	pvalue	padj	hgnc_symbol	tissue1	tissue2
ensembl_gene_id	baseMean	log2FoldChange	lfcSE	stat	pvalue	padj	hgnc_symbol	tissue1	tissue2
ensembl_gene_id	baseMean	log2FoldChange	lfcSE	stat	pvalue	padj	hgnc_symbol	tissue1	tissue2
ensembl_gene_id	baseMean	log2FoldChange	lfcSE	stat	pvalue	padj	hgnc_symbol	tissue1	tissue2
ensembl_gene_id	baseMean	log2FoldChange	lfcSE	stat	pvalue	padj	hgnc_symbol	tissue1	tissue2
ensembl_gene_id	baseMean	log2FoldChange	lfcSE	stat	pvalue	padj	hgnc_symbol	tissue1	tissue2
ensembl_gene_id	baseMean	log2FoldChange	lfcSE	stat	pvalue	padj	hgnc_symbol	tissue1	tissue2
ensembl_gene_id	baseMean	log2FoldChange	lfcSE	stat	pvalue	padj	hgnc_symbol	tissue1	tissue2
ensembl_gene_id	baseMean	log2FoldChange	lfcSE	stat	pvalue	padj	hgnc_symbol	tissue1	tissue2
ensembl_gene_id	baseMean	log2FoldChange	lfcSE	stat	pvalue	padj	hgnc_symbol	tissue1	tissue2
ensembl_gene_id	baseMean	log2FoldChange	lfcSE	stat	pvalue	padj	hgnc_symbol	tissue1	tissue2
ensembl_gene_id	baseMean	log2FoldChange	lfcSE	stat	pvalue	padj	hgnc_symbol	tissue1	tissue2
ensembl_gene_id	baseMean	log2FoldChange	lfcSE	stat	pvalue	padj	hgnc_symbol	tissue1	tissue2
ensembl_gene_id	baseMean	log2FoldChange	lfcSE	stat	pvalue	padj	hgnc_symbol	tissue1	tissue2
ensembl_gene_id	baseMean	log2FoldChange	lfcSE	stat	pvalue	padj	hgnc_symbol	tissue1	tissue2
ensembl_gene_id	baseMean	log2FoldChange	lfcSE	stat	pvalue	padj	hgnc_symbol	tissue1	tissue2
ensembl_gene_id	baseMean	log2FoldChange	lfcSE	stat	pvalue	padj	hgnc_symbol	tissue1	tissue2
ensembl_gene_id	baseMean	log2FoldChange	lfcSE	stat	pvalue	padj	hgnc_symbol	tissue1	tissue2
ensembl_gene_id	baseMean	log2FoldChange	lfcSE	stat	pvalue	padj	hgnc_symbol	tissue1	tissue2
ensembl_gene_id	baseMean	log2FoldChange	lfcSE	stat	pvalue	padj	hgnc_symbol	tissue1	tissue2
ensembl_gene_id	baseMean	log2FoldChange	lfcSE	stat	pvalue	padj	hgnc_symbol	tissue1	tissue2
ensembl_gene_id	baseMean	log2FoldChange	lfcSE	stat	pvalue	padj	hgnc_symbol	tissue1	tissue2
ensembl_gene_id	baseMean	log2FoldChange	lfcSE	stat	pvalue	padj	hgnc_symbol	tissue1	tissue2
ensembl_gene_id	baseMean	log2FoldChange	lfcSE	stat	pvalue	padj	hgnc_symbol	tissue1	tissue2
ensembl_gene_id	baseMean	log2FoldChange	lfcSE	stat	pvalue	padj	hgnc_symbol	tissue1	tissue2
ensembl_gene_id	baseMean	log2FoldChange	lfcSE	stat	pvalue	padj	hgnc_symbol	tissue1	tissue2
ensembl_gene_id	baseMean	log2FoldChange	lfcSE	stat	pvalue	padj	hgnc_symbol	tissue1	tissue2
ensembl_gene_id	baseMean	log2FoldChange	lfcSE	stat	pvalue	padj	hgnc_symbol	tissue1	tissue2
ensembl_gene_id	baseMean	log2FoldChange	lfcSE	stat	pvalue	padj	hgnc_symbol	tissue1	tissue2
ensembl_gene_id	baseMean	log2FoldChange	lfcSE	stat	pvalue	padj	hgnc_symbol	tissue1	tissue2
ensembl_gene_id	baseMean	log2FoldChange	lfcSE	stat	pvalue	padj	hgnc_symbol	tissue1	tissue2
ensembl_gene_id	baseMean	log2FoldChange	lfcSE	stat	pvalue	padj	hgnc_symbol	tissue1	tissue2
ensembl_gene_id	baseMean	log2FoldChange	lfcSE	stat	pvalue	padj	hgnc_symbol	tissue1	tissue2
ensembl_gene_id	baseMean	log2FoldChange	lfcSE	stat	pvalue	padj	hgnc_symbol	tissue1	tissue2
ensembl_gene_id	baseMean	log2FoldChange	lfcSE	stat	pvalue	padj	hgnc_symbol	tissue1	tissue2
ensembl_gene_id	baseMean	log2FoldChange	lfcSE	stat	pvalue	padj	hgnc_symbol	tissue1	tissue2
ensembl_gene_id	baseMean	log2FoldChange	lfcSE	stat	pvalue	padj	hgnc_symbol	tissue1	tissue2
ensembl_gene_id	baseMean	log2FoldChange	lfcSE	stat	pvalue	padj	hgnc_symbol	tissue1	tissue2
ensembl_gene_id	baseMean	log2FoldChange	lfcSE	stat	pvalue	padj	hgnc_symbol	tissue1	tissue2
ensembl_gene_id	baseMean	log2FoldChange	lfcSE	stat	pvalue	padj	hgnc_symbol	tissue1	tissue2
ensembl_gene_id	baseMean	log2FoldChange	lfcSE	stat	pvalue	padj	hgnc_symbol	tissue1	tissue2
ensembl_gene_id	baseMean	log2FoldChange	lfcSE	stat	pvalue	padj	hgnc_symbol	tissue1	tissue2
ensembl_gene_id	baseMean	log2FoldChange	lfcSE	stat	pvalue	padj	hgnc_symbol	tissue1	tissue2
ensembl_gene_id	baseMean	log2FoldChange	lfcSE	stat	pvalue	padj	hgnc_symbol	tissue1	tissue2
ensembl_gene_id	baseMean	log2FoldChange	lfcSE	stat	pvalue	padj	hgnc_symbol	tissue1	tissue2
ensembl_gene_id	baseMean	log2FoldChange	lfcSE	stat	pvalue	padj	hgnc_symbol	tissue1	tissue2
ensembl_gene_id	baseMean	log2FoldChange	lfcSE	stat	pvalue	padj	hgnc_symbol	tissue1	tissue2
ensembl_gene_id	baseMean	log2FoldChange	lfcSE	stat	pvalue	padj	hgnc_symbol	tissue1	tissue2
ensembl_gene_id	baseMean	log2FoldChange	lfcSE	stat	pvalue	padj	hgnc_symbol	tissue1	tissue2
ensembl_gene_id	baseMean	log2FoldChange	lfcSE	stat	pvalue	padj	hgnc_symbol	tissue1	tissue2
ensembl_gene_id	baseMean	log2FoldChange	lfcSE	stat	pvalue	padj	hgnc_symbol	tissue1	tissue2
ensembl_gene_id	baseMean	log2FoldChange	lfcSE	stat	pvalue	padj	hgnc_symbol	tissue1	tissue2
ensembl_gene_id	baseMean	log2FoldChange	lfcSE	stat	pvalue	padj	hgnc_symbol	tissue1	tissue2
ensembl_gene_id	baseMean	log2FoldChange	lfcSE	stat	pvalue	padj	hgnc_symbol	tissue1	tissue2
ensembl_gene_id	baseMean	log2FoldChange	lfcSE	stat	pvalue	padj	hgnc_symbol	tissue1	tissue2
ensembl_gene_id	baseMean	log2FoldChange	lfcSE	stat	pvalue	padj	hgnc_symbol	tissue1	tissue2
ensembl_gene_id	baseMean	log2FoldChange	lfcSE	stat	pvalue	padj	hgnc_symbol	tissue1	tissue2
ensembl_gene_id	baseMean	log2FoldChange	lfcSE	stat	pvalue	padj	hgnc_symbol	tissue1	tissue2
ensembl_gene_id	baseMean	log2FoldChange	lfcSE	stat	pvalue	padj	hgnc_symbol	tissue1	tissue2
ensembl_gene_id	baseMean	log2FoldChange	lfcSE	stat	pvalue	padj	hgnc_symbol	tissue1	tissue2
ensembl_gene_id	baseMean	log2FoldChange	lfcSE	stat	pvalue	padj	hgnc_symbol	tissue1	tissue2
ensembl_gene_id	baseMean	log2FoldChange	lfcSE	stat	pvalue	padj	hgnc_symbol	tissue1	tissue2
ensembl_gene_id	baseMean	log2FoldChange	lfcSE	stat	pvalue	padj	hgnc_symbol	tissue1	tissue2
ensembl_gene_id	baseMean	log2FoldChange	lfcSE	stat	pvalue	padj	hgnc_symbol	tissue1	tissue2
ensembl_gene_id	baseMean	log2FoldChange	lfcSE	stat	pvalue	padj	hgnc_symbol	tissue1	tissue2
ensembl_gene_id	baseMean	log2FoldChange	lfcSE	stat	pvalue	padj	hgnc_symbol	tissue1	tissue2
ensembl_gene_id	baseMean	log2FoldChange	lfcSE	stat	pvalue	padj	hgnc_symbol	tissue1	tissue2
ensembl_gene_id	baseMean	log2FoldChange	lfcSE	stat	pvalue	padj	hgnc_symbol	tissue1	tissue2
ensembl_gene_id	baseMean	log2FoldChange	lfcSE	stat	pvalue	padj	hgnc_symbol	tissue1	tissue2
ensembl_gene_id	baseMean	log2FoldChange	lfcSE	stat	pvalue	padj	hgnc_symbol	tissue1	tissue2
ensembl_gene_id	baseMean	log2FoldChange	lfcSE	stat	pvalue	padj	hgnc_symbol	tissue1	tissue2
ensembl_gene_id	baseMean	log2FoldChange	lfcSE	stat	pvalue	padj	hgnc_symbol	tissue1	tissue2
ensembl_gene_id	baseMean	log2FoldChange	lfcSE	stat	pvalue	padj	hgnc_symbol	tissue1	tissue2
ensembl_gene_id	baseMean	log2FoldChange	lfcSE	stat	pvalue	padj	hgnc_symbol	tissue1	tissue2
ensembl_gene_id	baseMean	log2FoldChange	lfcSE	stat	pvalue	padj	hgnc_symbol	tissue1	tissue2
ensembl_gene_id	baseMean	log2FoldChange	lfcSE	stat	pvalue	padj	hgnc_symbol	tissue1	tissue2
ensembl_gene_id	baseMean	log2FoldChange	lfcSE	stat	pvalue	padj	hgnc_symbol	tissue1	tissue2
ensembl_gene_id	baseMean	log2FoldChange	lfcSE	stat	pvalue	padj	hgnc_symbol	tissue1	tissue2
ensembl_gene_id	baseMean	log2FoldChange	lfcSE	stat	pvalue	padj	hgnc_symbol	tissue1	tissue2
ensembl_gene_id	baseMean	log2FoldChange	lfcSE	stat	pvalue	padj	hgnc_symbol	tissue1	tissue2
ensembl_gene_id	baseMean	log2FoldChange	lfcSE	stat	pvalue	padj	hgnc_symbol	tissue1	tissue2
ensembl_gene_id	baseMean	log2FoldChange	lfcSE	stat	pvalue	padj	hgnc_symbol	tissue1	tissue2
ensembl_gene_id	baseMean	log2FoldChange	lfcSE	stat	pvalue	padj	hgnc_symbol	tissue1	tissue2
ensembl_gene_id	baseMean	log2FoldChange	lfcSE	stat	pvalue	padj	hgnc_symbol	tissue1	tissue2
ensembl_gene_id	baseMean	log2FoldChange	lfcSE	stat	pvalue	padj	hgnc_symbol	tissue1	tissue2
ensembl_gene_id	baseMean	log2FoldChange	lfcSE	stat	pvalue	padj	hgnc_symbol	tissue1	tissue2
ensembl_gene_id	baseMean	log2FoldChange	lfcSE	stat	pvalue	padj	hgnc_symbol	tissue1	tissue2
ensembl_gene_id	baseMean	log2FoldChange	lfcSE	stat	pvalue	padj	hgnc_symbol	tissue1	tissue2
ensembl_gene_id	baseMean	log2FoldChange	lfcSE	stat	pvalue	padj	hgnc_symbol	tissue1	tissue2
ensembl_gene_id	baseMean	log2FoldChange	lfcSE	stat	pvalue	padj	hgnc_symbol	tissue1	tissue2
ensembl_gene_id	baseMean	log2FoldChange	lfcSE	stat	pvalue	padj	hgnc_symbol	tissue1	tissue2
ensembl_gene_id	baseMean	log2FoldChange	lfcSE	stat	pvalue	padj	hgnc_symbol	tissue1	tissue2
ensembl_gene_id	baseMean	log2FoldChange	lfcSE	stat	pvalue	padj	hgnc_symbol	tissue1	tissue2
ensembl_gene_id	baseMean	log2FoldChange	lfcSE	stat	pvalue	padj	hgnc_symbol	tissue1	tissue2
ensembl_gene_id	baseMean	log2FoldChange	lfcSE	stat	pvalue	padj	hgnc_symbol	tissue1	tissue2
ensembl_gene_id	baseMean	log2FoldChange	lfcSE	stat	pvalue	padj	hgnc_symbol	tissue1	tissue2
ensembl_gene_id	baseMean	log2FoldChange	lfcSE	stat	pvalue	padj	hgnc_symbol	tissue1	tissue2
ensembl_gene_id	baseMean	log2FoldChange	lfcSE	stat	pvalue	padj	hgnc_symbol	tissue1	tissue2
ensembl_gene_id	baseMean	log2FoldChange	lfcSE	stat	pvalue	padj	hgnc_symbol	tissue1	tissue2
ensembl_gene_id	baseMean	log2FoldChange	lfcSE	stat	pvalue	padj	hgnc_symbol	tissue1	tissue2
ensembl_gene_id	baseMean	log2FoldChange	lfcSE	stat	pvalue	padj	hgnc_symbol	tissue1	tissue2
ensembl_gene_id	baseMean	log2FoldChange	lfcSE	stat	pvalue	padj	hgnc_symbol	tissue1	tissue2
ensembl_gene_id	baseMean	log2FoldChange	lfcSE	stat	pvalue	padj	hgnc_symbol	tissue1	tissue2
ensembl_gene_id	baseMean	log2FoldChange	lfcSE	stat	pvalue	padj	hgnc_symbol	tissue1	tissue2
ensembl_gene_id	baseMean	log2FoldChange	lfcSE	stat	pvalue	padj	hgnc_symbol	tissue1	tissue2
ensembl_gene_id	baseMean	log2FoldChange	lfcSE	stat	pvalue	padj	hgnc_symbol	tissue1	tissue2
ensembl_gene_id	baseMean	log2FoldChange	lfcSE	stat	pvalue	padj	hgnc_symbol	tissue1	tissue2
ensembl_gene_id	baseMean	log2FoldChange	lfcSE	stat	pvalue	padj	hgnc_symbol	tissue1	tissue2
ensembl_gene_id	baseMean	log2FoldChange	lfcSE	stat	pvalue	padj	hgnc_symbol	tissue1	tissue2
ensembl_gene_id	baseMean	log2FoldChange	lfcSE	stat	pvalue	padj	hgnc_symbol	tissue1	tissue2
ensembl_gene_id	baseMean	log2FoldChange	lfcSE	stat	pvalue	padj	hgnc_symbol	tissue1	tissue2
ensembl_gene_id	baseMean	log2FoldChange	lfcSE	stat	pvalue	padj	hgnc_symbol	tissue1	tissue2
ensembl_gene_id	baseMean	log2FoldChange	lfcSE	stat	pvalue	padj	hgnc_symbol	tissue1	tissue2
ensembl_gene_id	baseMean	log2FoldChange	lfcSE	stat	pvalue	padj	hgnc_symbol	tissue1	tissue2
ensembl_gene_id	baseMean	log2FoldChange	lfcSE	stat	pvalue	padj	hgnc_symbol	tissue1	tissue2
ensembl_gene_id	baseMean	log2FoldChange	lfcSE	stat	pvalue	padj	hgnc_symbol	tissue1	tissue2
ensembl_gene_id	baseMean	log2FoldChange	lfcSE	stat	pvalue	padj	hgnc_symbol	tissue1	tissue2
ensembl_gene_id	baseMean	log2FoldChange	lfcSE	stat	pvalue	padj	hgnc_symbol	tissue1	tissue2
ensembl_gene_id	baseMean	log2FoldChange	lfcSE	stat	pvalue	padj	hgnc_symbol	tissue1	tissue2
ensembl_gene_id	baseMean	log2FoldChange	lfcSE	stat	pvalue	padj	hgnc_symbol	tissue1	tissue2
ensembl_gene_id	baseMean	log2FoldChange	lfcSE	stat	pvalue	padj	hgnc_symbol	tissue1	tissue2
ensembl_gene_id	baseMean	log2FoldChange	lfcSE	stat	pvalue	padj	hgnc_symbol	tissue1	tissue2
ensembl_gene_id	baseMean	log2FoldChange	lfcSE	stat	pvalue	padj	hgnc_symbol	tissue1	tissue2
ensembl_gene_id	baseMean	log2FoldChange	lfcSE	stat	pvalue	padj	hgnc_symbol	tissue1	tissue2
ensembl_gene_id	baseMean	log2FoldChange	lfcSE	stat	pvalue	padj	hgnc_symbol	tissue1	tissue2
ensembl_gene_id	baseMean	log2FoldChange	lfcSE	stat	pvalue	padj	hgnc_symbol	tissue1	tissue2
ensembl_gene_id	baseMean	log2FoldChange	lfcSE	stat	pvalue	padj	hgnc_symbol	tissue1	tissue2
ensembl_gene_id	baseMean	log2FoldChange	lfcSE	stat	pvalue	padj	hgnc_symbol	tissue1	tissue2
ensembl_gene_id	baseMean	log2FoldChange	lfcSE	stat	pvalue	padj	hgnc_symbol	tissue1	tissue2
ensembl_gene_id	baseMean	log2FoldChange	lfcSE	stat	pvalue	padj	hgnc_symbol	tissue1	tissue2
ensembl_gene_id	baseMean	log2FoldChange	lfcSE	stat	pvalue	padj	hgnc_symbol	tissue1	tissue2
ensembl_gene_id	baseMean	log2FoldChange	lfcSE	stat	pvalue	padj	hgnc_symbol	tissue1	tissue2
ensembl_gene_id	baseMean	log2FoldChange	lfcSE	stat	pvalue	padj	hgnc_symbol	tissue1	tissue2
ensembl_gene_id	baseMean	log2FoldChange	lfcSE	stat	pvalue	padj	hgnc_symbol	tissue1	tissue2
ensembl_gene_id	baseMean	log2FoldChange	lfcSE	stat	pvalue	padj	hgnc_symbol	tissue1	tissue2
ensembl_gene_id	baseMean	log2FoldChange	lfcSE	stat	pvalue	padj	hgnc_symbol	tissue1	tissue2
ensembl_gene_id	baseMean	log2FoldChange	lfcSE	stat	pvalue	padj	hgnc_symbol	tissue1	tissue2
ensembl_gene_id	baseMean	log2FoldChange	lfcSE	stat	pvalue	padj	hgnc_symbol	tissue1	tissue2
ensembl_gene_id	baseMean	log2FoldChange	lfcSE	stat	pvalue	padj	hgnc_symbol	tissue1	tissue2
ensembl_gene_id	baseMean	log2FoldChange	lfcSE	stat	pvalue	padj	hgnc_symbol	tissue1	tissue2
ensembl_gene_id	baseMean	log2FoldChange	lfcSE	stat	pvalue	padj	hgnc_symbol	tissue1	tissue2
ensembl_gene_id	baseMean	log2FoldChange	lfcSE	stat	pvalue	padj	hgnc_symbol	tissue1	tissue2
ensembl_gene_id	baseMean	log2FoldChange	lfcSE	stat	pvalue	padj	hgnc_symbol	tissue1	tissue2
ensembl_gene_id	baseMean	log2FoldChange	lfcSE	stat	pvalue	padj	hgnc_symbol	tissue1	tissue2
ensembl_gene_id	baseMean	log2FoldChange	lfcSE	stat	pvalue	padj	hgnc_symbol	tissue1	tissue2
ensembl_gene_id	baseMean	log2FoldChange	lfcSE	stat	pvalue	padj	hgnc_symbol	tissue1	tissue2
ensembl_gene_id	baseMean	log2FoldChange	lfcSE	stat	pvalue	padj	hgnc_symbol	tissue1	tissue2
ensembl_gene_id	baseMean	log2FoldChange	lfcSE	stat	pvalue	padj	hgnc_symbol	tissue1	tissue2
ensembl_gene_id	baseMean	log2FoldChange	lfcSE	stat	pvalue	padj	hgnc_symbol	tissue1	tissue2
ensembl_gene_id	baseMean	log2FoldChange	lfcSE	stat	pvalue	padj	hgnc_symbol	tissue1	tissue2
ensembl_gene_id	baseMean	log2FoldChange	lfcSE	stat	pvalue	padj	hgnc_symbol	tissue1	tissue2
ensembl_gene_id	baseMean	log2FoldChange	lfcSE	stat	pvalue	padj	hgnc_symbol	tissue1	tissue2
ensembl_gene_id	baseMean	log2FoldChange	lfcSE	stat	pvalue	padj	hgnc_symbol	tissue1	tissue2
ensembl_gene_id	baseMean	log2FoldChange	lfcSE	stat	pvalue	padj	hgnc_symbol	tissue1	tissue2
ensembl_gene_id	baseMean	log2FoldChange	lfcSE	stat	pvalue	padj	hgnc_symbol	tissue1	tissue2
ensembl_gene_id	baseMean	log2FoldChange	lfcSE	stat	pvalue	padj	hgnc_symbol	tissue1	tissue2
ensembl_gene_id	baseMean	log2FoldChange	lfcSE	stat	pvalue	padj	hgnc_symbol	tissue1	tissue2
ensembl_gene_id	baseMean	log2FoldChange	lfcSE	stat	pvalue	padj	hgnc_symbol	tissue1	tissue2
ensembl_gene_id	baseMean	log2FoldChange	lfcSE	stat	pvalue	padj	hgnc_symbol	tissue1	tissue2
ensembl_gene_id	baseMean	log2FoldChange	lfcSE	stat	pvalue	padj	hgnc_symbol	tissue1	tissue2
ensembl_gene_id	baseMean	log2FoldChange	lfcSE	stat	pvalue	padj	hgnc_symbol	tissue1	tissue2
ensembl_gene_id	baseMean	log2FoldChange	lfcSE	stat	pvalue	padj	hgnc_symbol	tissue1	tissue2
ensembl_gene_id	baseMean	log2FoldChange	lfcSE	stat	pvalue	padj	hgnc_symbol	tissue1	tissue2
ensembl_gene_id	baseMean	log2FoldChange	lfcSE	stat	pvalue	padj	hgnc_symbol	tissue1	tissue2
ensembl_gene_id	baseMean	log2FoldChange	lfcSE	stat	pvalue	padj	hgnc_symbol	tissue1	tissue2
ensembl_gene_id	baseMean	log2FoldChange	lfcSE	stat	pvalue	padj	hgnc_symbol	tissue1	tissue2
ensembl_gene_id	baseMean	log2FoldChange	lfcSE	stat	pvalue	padj	hgnc_symbol	tissue1	tissue2
ensembl_gene_id	baseMean	log2FoldChange	lfcSE	stat	pvalue	padj	hgnc_symbol	tissue1	tissue2
ensembl_gene_id	baseMean	log2FoldChange	lfcSE	stat	pvalue	padj	hgnc_symbol	tissue1	tissue2
ensembl_gene_id	baseMean	log2FoldChange	lfcSE	stat	pvalue	padj	hgnc_symbol	tissue1	tissue2
ensembl_gene_id	baseMean	log2FoldChange	lfcSE	stat	pvalue	padj	hgnc_symbol	tissue1	tissue2
ensembl_gene_id	baseMean	log2FoldChange	lfcSE	stat	pvalue	padj	hgnc_symbol	tissue1	tissue2
ensembl_gene_id	baseMean	log2FoldChange	lfcSE	stat	pvalue	padj	hgnc_symbol	tissue1	tissue2
ensembl_gene_id	baseMean	log2FoldChange	lfcSE	stat	pvalue	padj	hgnc_symbol	tissue1	tissue2
ensembl_gene_id	baseMean	log2FoldChange	lfcSE	stat	pvalue	padj	hgnc_symbol	tissue1	tissue2
ensembl_gene_id	baseMean	log2FoldChange	lfcSE	stat	pvalue	padj	hgnc_symbol	tissue1	tissue2
ensembl_gene_id	baseMean	log2FoldChange	lfcSE	stat	pvalue	padj	hgnc_symbol	tissue1	tissue2
ensembl_gene_id	baseMean	log2FoldChange	lfcSE	stat	pvalue	padj	hgnc_symbol	tissue1	tissue2
ensembl_gene_id	baseMean	log2FoldChange	lfcSE	stat	pvalue	padj	hgnc_symbol	tissue1	tissue2
ensembl_gene_id	baseMean	log2FoldChange	lfcSE	stat	pvalue	padj	hgnc_symbol	tissue1	tissue2
ensembl_gene_id	baseMean	log2FoldChange	lfcSE	stat	pvalue	padj	hgnc_symbol	tissue1	tissue2
ensembl_gene_id	baseMean	log2FoldChange	lfcSE	stat	pvalue	padj	hgnc_symbol	tissue1	tissue2
ensembl_gene_id	baseMean	log2FoldChange	lfcSE	stat	pvalue	padj	hgnc_symbol	tissue1	tissue2
ensembl_gene_id	baseMean	log2FoldChange	lfcSE	stat	pvalue	padj	hgnc_symbol	tissue1	tissue2
ensembl_gene_id	baseMean	log2FoldChange	lfcSE	stat	pvalue	padj	hgnc_symbol	tissue1	tissue2
ensembl_gene_id	baseMean	log2FoldChange	lfcSE	stat	pvalue	padj	hgnc_symbol	tissue1	tissue2
ensembl_gene_id	baseMean	log2FoldChange	lfcSE	stat	pvalue	padj	hgnc_symbol	tissue1	tissue2
ensembl_gene_id	baseMean	log2FoldChange	lfcSE	stat	pvalue	padj	hgnc_symbol	tissue1	tissue2
ensembl_gene_id	baseMean	log2FoldChange	lfcSE	stat	pvalue	padj	hgnc_symbol	tissue1	tissue2
ensembl_gene_id	baseMean	log2FoldChange	lfcSE	stat	pvalue	padj	hgnc_symbol	tissue1	tissue2
ensembl_gene_id	baseMean	log2FoldChange	lfcSE	stat	pvalue	padj	hgnc_symbol	tissue1	tissue2
ensembl_gene_id	baseMean	log2FoldChange	lfcSE	stat	pvalue	padj	hgnc_symbol	tissue1	tissue2
ensembl_gene_id	baseMean	log2FoldChange	lfcSE	stat	pvalue	padj	hgnc_symbol	tissue1	tissue2
ensembl_gene_id	baseMean	log2FoldChange	lfcSE	stat	pvalue	padj	hgnc_symbol	tissue1	tissue2
ensembl_gene_id	baseMean	log2FoldChange	lfcSE	stat	pvalue	padj	hgnc_symbol	tissue1	tissue2
ensembl_gene_id	baseMean	log2FoldChange	lfcSE	stat	pvalue	padj	hgnc_symbol	tissue1	tissue2
ensembl_gene_id	baseMean	log2FoldChange	lfcSE	stat	pvalue	padj	hgnc_symbol	tissue1	tissue2
ensembl_gene_id	baseMean	log2FoldChange	lfcSE	stat	pvalue	padj	hgnc_symbol	tissue1	tissue2
ensembl_gene_id	baseMean	log2FoldChange	lfcSE	stat	pvalue	padj	hgnc_symbol	tissue1	tissue2
ensembl_gene_id	baseMean	log2FoldChange	lfcSE	stat	pvalue	padj	hgnc_symbol	tissue1	tissue2
ensembl_gene_id	baseMean	log2FoldChange	lfcSE	stat	pvalue	padj	hgnc_symbol	tissue1	tissue2
ensembl_gene_id	baseMean	log2FoldChange	lfcSE	stat	pvalue	padj	hgnc_symbol	tissue1	tissue2
ensembl_gene_id	baseMean	log2FoldChange	lfcSE	stat	pvalue	padj	hgnc_symbol	tissue1	tissue2
ensembl_gene_id	baseMean	log2FoldChange	lfcSE	stat	pvalue	padj	hgnc_symbol	tissue1	tissue2
ensembl_gene_id	baseMean	log2FoldChange	lfcSE	stat	pvalue	padj	hgnc_symbol	tissue1	tissue2
ensembl_gene_id	baseMean	log2FoldChange	lfcSE	stat	pvalue	padj	hgnc_symbol	tissue1	tissue2
ensembl_gene_id	baseMean	log2FoldChange	lfcSE	stat	pvalue	padj	hgnc_symbol	tissue1	tissue2
ensembl_gene_id	baseMean	log2FoldChange	lfcSE	stat	pvalue	padj	hgnc_symbol	tissue1	tissue2
ensembl_gene_id	baseMean	log2FoldChange	lfcSE	stat	pvalue	padj	hgnc_symbol	tissue1	tissue2
ensembl_gene_id	baseMean	log2FoldChange	lfcSE	stat	pvalue	padj	hgnc_symbol	tissue1	tissue2
ensembl_gene_id	baseMean	log2FoldChange	lfcSE	stat	pvalue	padj	hgnc_symbol	tissue1	tissue2
ensembl_gene_id	baseMean	log2FoldChange	lfcSE	stat	pvalue	padj	hgnc_symbol	tissue1	tissue2
ensembl_gene_id	baseMean	log2FoldChange	lfcSE	stat	pvalue	padj	hgnc_symbol	tissue1	tissue2
ensembl_gene_id	baseMean	log2FoldChange	lfcSE	stat	pvalue	padj	hgnc_symbol	tissue1	tissue2
ensembl_gene_id	baseMean	log2FoldChange	lfcSE	stat	pvalue	padj	hgnc_symbol	tissue1	tissue2
ensembl_gene_id	baseMean	log2FoldChange	lfcSE	stat	pvalue	padj	hgnc_symbol	tissue1	tissue2
ensembl_gene_id	baseMean	log2FoldChange	lfcSE	stat	pvalue	padj	hgnc_symbol	tissue1	tissue2
ensembl_gene_id	baseMean	log2FoldChange	lfcSE	stat	pvalue	padj	hgnc_symbol	tissue1	tissue2
ensembl_gene_id	baseMean	log2FoldChange	lfcSE	stat	pvalue	padj	hgnc_symbol	tissue1	tissue2
ensembl_gene_id	baseMean	log2FoldChange	lfcSE	stat	pvalue	padj	hgnc_symbol	tissue1	tissue2
ensembl_gene_id	baseMean	log2FoldChange	lfcSE	stat	pvalue	padj	hgnc_symbol	tissue1	tissue2
ensembl_gene_id	baseMean	log2FoldChange	lfcSE	stat	pvalue	padj	hgnc_symbol	tissue1	tissue2
ensembl_gene_id	baseMean	log2FoldChange	lfcSE	stat	pvalue	padj	hgnc_symbol	tissue1	tissue2
ensembl_gene_id	baseMean	log2FoldChange	lfcSE	stat	pvalue	padj	hgnc_symbol	tissue1	tissue2
ensembl_gene_id	baseMean	log2FoldChange	lfcSE	stat	pvalue	padj	hgnc_symbol	tissue1	tissue2
ensembl_gene_id	baseMean	log2FoldChange	lfcSE	stat	pvalue	padj	hgnc_symbol	tissue1	tissue2
ensembl_gene_id	baseMean	log2FoldChange	lfcSE	stat	pvalue	padj	hgnc_symbol	tissue1	tissue2
ensembl_gene_id	baseMean	log2FoldChange	lfcSE	stat	pvalue	padj	hgnc_symbol	tissue1	tissue2
ensembl_gene_id	baseMean	log2FoldChange	lfcSE	stat	pvalue	padj	hgnc_symbol	tissue1	tissue2
ensembl_gene_id	baseMean	log2FoldChange	lfcSE	stat	pvalue	padj	hgnc_symbol	tissue1	tissue2
ensembl_gene_id	baseMean	log2FoldChange	lfcSE	stat	pvalue	padj	hgnc_symbol	tissue1	tissue2
ensembl_gene_id	baseMean	log2FoldChange	lfcSE	stat	pvalue	padj	hgnc_symbol	tissue1	tissue2
ensembl_gene_id	baseMean	log2FoldChange	lfcSE	stat	pvalue	padj	hgnc_symbol	tissue1	tissue2
ensembl_gene_id	baseMean	log2FoldChange	lfcSE	stat	pvalue	padj	hgnc_symbol	tissue1	tissue2
ensembl_gene_id	baseMean	log2FoldChange	lfcSE	stat	pvalue	padj	hgnc_symbol	tissue1	tissue2
ensembl_gene_id	baseMean	log2FoldChange	lfcSE	stat	pvalue	padj	hgnc_symbol	tissue1	tissue2
ensembl_gene_id	baseMean	log2FoldChange	lfcSE	stat	pvalue	padj	hgnc_symbol	tissue1	tissue2
ensembl_gene_id	baseMean	log2FoldChange	lfcSE	stat	pvalue	padj	hgnc_symbol	tissue1	tissue2
ensembl_gene_id	baseMean	log2FoldChange	lfcSE	stat	pvalue	padj	hgnc_symbol	tissue1	tissue2
ensembl_gene_id	baseMean	log2FoldChange	lfcSE	stat	pvalue	padj	hgnc_symbol	tissue1	tissue2
ensembl_gene_id	baseMean	log2FoldChange	lfcSE	stat	pvalue	padj	hgnc_symbol	tissue1	tissue2
ensembl_gene_id	baseMean	log2FoldChange	lfcSE	stat	pvalue	padj	hgnc_symbol	tissue1	tissue2
ensembl_gene_id	baseMean	log2FoldChange	lfcSE	stat	pvalue	padj	hgnc_symbol	tissue1	tissue2
ensembl_gene_id	baseMean	log2FoldChange	lfcSE	stat	pvalue	padj	hgnc_symbol	tissue1	tissue2
ensembl_gene_id	baseMean	log2FoldChange	lfcSE	stat	pvalue	padj	hgnc_symbol	tissue1	tissue2
ensembl_gene_id	baseMean	log2FoldChange	lfcSE	stat	pvalue	padj	hgnc_symbol	tissue1	tissue2
ensembl_gene_id	baseMean	log2FoldChange	lfcSE	stat	pvalue	padj	hgnc_symbol	tissue1	tissue2
ensembl_gene_id	baseMean	log2FoldChange	lfcSE	stat	pvalue	padj	hgnc_symbol	tissue1	tissue2
ensembl_gene_id	baseMean	log2FoldChange	lfcSE	stat	pvalue	padj	hgnc_symbol	tissue1	tissue2
ensembl_gene_id	baseMean	log2FoldChange	lfcSE	stat	pvalue	padj	hgnc_symbol	tissue1	tissue2
ensembl_gene_id	baseMean	log2FoldChange	lfcSE	stat	pvalue	padj	hgnc_symbol	tissue1	tissue2
ensembl_gene_id	baseMean	log2FoldChange	lfcSE	stat	pvalue	padj	hgnc_symbol	tissue1	tissue2
ensembl_gene_id	baseMean	log2FoldChange	lfcSE	stat	pvalue	padj	hgnc_symbol	tissue1	tissue2
ensembl_gene_id	baseMean	log2FoldChange	lfcSE	stat	pvalue	padj	hgnc_symbol	tissue1	tissue2
ensembl_gene_id	baseMean	log2FoldChange	lfcSE	stat	pvalue	padj	hgnc_symbol	tissue1	tissue2
ensembl_gene_id	baseMean	log2FoldChange	lfcSE	stat	pvalue	padj	hgnc_symbol	tissue1	tissue2
ensembl_gene_id	baseMean	log2FoldChange	lfcSE	stat	pvalue	padj	hgnc_symbol	tissue1	tissue2
ensembl_gene_id	baseMean	log2FoldChange	lfcSE	stat	pvalue	padj	hgnc_symbol	tissue1	tissue2
ensembl_gene_id	baseMean	log2FoldChange	lfcSE	stat	pvalue	padj	hgnc_symbol	tissue1	tissue2
ensembl_gene_id	baseMean	log2FoldChange	lfcSE	stat	pvalue	padj	hgnc_symbol	tissue1	tissue2
ensembl_gene_id	baseMean	log2FoldChange	lfcSE	stat	pvalue	padj	hgnc_symbol	tissue1	tissue2
ensembl_gene_id	baseMean	log2FoldChange	lfcSE	stat	pvalue	padj	hgnc_symbol	tissue1	tissue2
ensembl_gene_id	baseMean	log2FoldChange	lfcSE	stat	pvalue	padj	hgnc_symbol	tissue1	tissue2
ensembl_gene_id	baseMean	log2FoldChange	lfcSE	stat	pvalue	padj	hgnc_symbol	tissue1	tissue2
ensembl_gene_id	baseMean	log2FoldChange	lfcSE	stat	pvalue	padj	hgnc_symbol	tissue1	tissue2
ensembl_gene_id	baseMean	log2FoldChange	lfcSE	stat	pvalue	padj	hgnc_symbol	tissue1	tissue2
ensembl_gene_id	baseMean	log2FoldChange	lfcSE	stat	pvalue	padj	hgnc_symbol	tissue1	tissue2
ensembl_gene_id	baseMean	log2FoldChange	lfcSE	stat	pvalue	padj	hgnc_symbol	tissue1	tissue2
ensembl_gene_id	baseMean	log2FoldChange	lfcSE	stat	pvalue	padj	hgnc_symbol	tissue1	tissue2
ensembl_gene_id	baseMean	log2FoldChange	lfcSE	stat	pvalue	padj	hgnc_symbol	tissue1	tissue2
ensembl_gene_id	baseMean	log2FoldChange	lfcSE	stat	pvalue	padj	hgnc_symbol	tissue1	tissue2
ensembl_gene_id	baseMean	log2FoldChange	lfcSE	stat	pvalue	padj	hgnc_symbol	tissue1	tissue2
ensembl_gene_id	baseMean	log2FoldChange	lfcSE	stat	pvalue	padj	hgnc_symbol	tissue1	tissue2
ensembl_gene_id	baseMean	log2FoldChange	lfcSE	stat	pvalue	padj	hgnc_symbol	tissue1	tissue2
ensembl_gene_id	baseMean	log2FoldChange	lfcSE	stat	pvalue	padj	hgnc_symbol	tissue1	tissue2
ensembl_gene_id	baseMean	log2FoldChange	lfcSE	stat	pvalue	padj	hgnc_symbol	tissue1	tissue2
ensembl_gene_id	baseMean	log2FoldChange	lfcSE	stat	pvalue	padj	hgnc_symbol	tissue1	tissue2
ensembl_gene_id	baseMean	log2FoldChange	lfcSE	stat	pvalue	padj	hgnc_symbol	tissue1	tissue2
ensembl_gene_id	baseMean	log2FoldChange	lfcSE	stat	pvalue	padj	hgnc_symbol	tissue1	tissue2
ensembl_gene_id	baseMean	log2FoldChange	lfcSE	stat	pvalue	padj	hgnc_symbol	tissue1	tissue2
ensembl_gene_id	baseMean	log2FoldChange	lfcSE	stat	pvalue	padj	hgnc_symbol	tissue1	tissue2
ensembl_gene_id	baseMean	log2FoldChange	lfcSE	stat	pvalue	padj	hgnc_symbol	tissue1	tissue2
ensembl_gene_id	baseMean	log2FoldChange	lfcSE	stat	pvalue	padj	hgnc_symbol	tissue1	tissue2
ensembl_gene_id	baseMean	log2FoldChange	lfcSE	stat	pvalue	padj	hgnc_symbol	tissue1	tissue2
ensembl_gene_id	baseMean	log2FoldChange	lfcSE	stat	pvalue	padj	hgnc_symbol	tissue1	tissue2
ensembl_gene_id	baseMean	log2FoldChange	lfcSE	stat	pvalue	padj	hgnc_symbol	tissue1	tissue2
ensembl_gene_id	baseMean	log2FoldChange	lfcSE	stat	pvalue	padj	hgnc_symbol	tissue1	tissue2
ensembl_gene_id	baseMean	log2FoldChange	lfcSE	stat	pvalue	padj	hgnc_symbol	tissue1	tissue2
ensembl_gene_id	baseMean	log2FoldChange	lfcSE	stat	pvalue	padj	hgnc_symbol	tissue1	tissue2
ensembl_gene_id	baseMean	log2FoldChange	lfcSE	stat	pvalue	padj	hgnc_symbol	tissue1	tissue2
ensembl_gene_id	baseMean	log2FoldChange	lfcSE	stat	pvalue	padj	hgnc_symbol	tissue1	tissue2
ensembl_gene_id	baseMean	log2FoldChange	lfcSE	stat	pvalue	padj	hgnc_symbol	tissue1	tissue2
ensembl_gene_id	baseMean	log2FoldChange	lfcSE	stat	pvalue	padj	hgnc_symbol	tissue1	tissue2
ensembl_gene_id	baseMean	log2FoldChange	lfcSE	stat	pvalue	padj	hgnc_symbol	tissue1	tissue2
ensembl_gene_id	baseMean	log2FoldChange	lfcSE	stat	pvalue	padj	hgnc_symbol	tissue1	tissue2
ensembl_gene_id	baseMean	log2FoldChange	lfcSE	stat	pvalue	padj	hgnc_symbol	tissue1	tissue2
ensembl_gene_id	baseMean	log2FoldChange	lfcSE	stat	pvalue	padj	hgnc_symbol	tissue1	tissue2
ensembl_gene_id	baseMean	log2FoldChange	lfcSE	stat	pvalue	padj	hgnc_symbol	tissue1	tissue2
ensembl_gene_id	baseMean	log2FoldChange	lfcSE	stat	pvalue	padj	hgnc_symbol	tissue1	tissue2
ensembl_gene_id	baseMean	log2FoldChange	lfcSE	stat	pvalue	padj	hgnc_symbol	tissue1	tissue2
ensembl_gene_id	baseMean	log2FoldChange	lfcSE	stat	pvalue	padj	hgnc_symbol	tissue1	tissue2
ensembl_gene_id	baseMean	log2FoldChange	lfcSE	stat	pvalue	padj	hgnc_symbol	tissue1	tissue2
ensembl_gene_id	baseMean	log2FoldChange	lfcSE	stat	pvalue	padj	hgnc_symbol	tissue1	tissue2
ensembl_gene_id	baseMean	log2FoldChange	lfcSE	stat	pvalue	padj	hgnc_symbol	tissue1	tissue2
ensembl_gene_id	baseMean	log2FoldChange	lfcSE	stat	pvalue	padj	hgnc_symbol	tissue1	tissue2
ensembl_gene_id	baseMean	log2FoldChange	lfcSE	stat	pvalue	padj	hgnc_symbol	tissue1	tissue2
ensembl_gene_id	baseMean	log2FoldChange	lfcSE	stat	pvalue	padj	hgnc_symbol	tissue1	tissue2
ensembl_gene_id	baseMean	log2FoldChange	lfcSE	stat	pvalue	padj	hgnc_symbol	tissue1	tissue2
ensembl_gene_id	baseMean	log2FoldChange	lfcSE	stat	pvalue	padj	hgnc_symbol	tissue1	tissue2
ensembl_gene_id	baseMean	log2FoldChange	lfcSE	stat	pvalue	padj	hgnc_symbol	tissue1	tissue2
ensembl_gene_id	baseMean	log2FoldChange	lfcSE	stat	pvalue	padj	hgnc_symbol	tissue1	tissue2
ensembl_gene_id	baseMean	log2FoldChange	lfcSE	stat	pvalue	padj	hgnc_symbol	tissue1	tissue2
ensembl_gene_id	baseMean	log2FoldChange	lfcSE	stat	pvalue	padj	hgnc_symbol	tissue1	tissue2
ensembl_gene_id	baseMean	log2FoldChange	lfcSE	stat	pvalue	padj	hgnc_symbol	tissue1	tissue2
ensembl_gene_id	baseMean	log2FoldChange	lfcSE	stat	pvalue	padj	hgnc_symbol	tissue1	tissue2
ensembl_gene_id	baseMean	log2FoldChange	lfcSE	stat	pvalue	padj	hgnc_symbol	tissue1	tissue2
ensembl_gene_id	baseMean	log2FoldChange	lfcSE	stat	pvalue	padj	hgnc_symbol	tissue1	tissue2
ensembl_gene_id	baseMean	log2FoldChange	lfcSE	stat	pvalue	padj	hgnc_symbol	tissue1	tissue2
ensembl_gene_id	baseMean	log2FoldChange	lfcSE	stat	pvalue	padj	hgnc_symbol	tissue1	tissue2
ensembl_gene_id	baseMean	log2FoldChange	lfcSE	stat	pvalue	padj	hgnc_symbol	tissue1	tissue2
ensembl_gene_id	baseMean	log2FoldChange	lfcSE	stat	pvalue	padj	hgnc_symbol	tissue1	tissue2
ensembl_gene_id	baseMean	log2FoldChange	lfcSE	stat	pvalue	padj	hgnc_symbol	tissue1	tissue2
ensembl_gene_id	baseMean	log2FoldChange	lfcSE	stat	pvalue	padj	hgnc_symbol	tissue1	tissue2
ensembl_gene_id	baseMean	log2FoldChange	lfcSE	stat	pvalue	padj	hgnc_symbol	tissue1	tissue2
ensembl_gene_id	baseMean	log2FoldChange	lfcSE	stat	pvalue	padj	hgnc_symbol	tissue1	tissue2
ensembl_gene_id	baseMean	log2FoldChange	lfcSE	stat	pvalue	padj	hgnc_symbol	tissue1	tissue2
ensembl_gene_id	baseMean	log2FoldChange	lfcSE	stat	pvalue	padj	hgnc_symbol	tissue1	tissue2
ensembl_gene_id	baseMean	log2FoldChange	lfcSE	stat	pvalue	padj	hgnc_symbol	tissue1	tissue2
ensembl_gene_id	baseMean	log2FoldChange	lfcSE	stat	pvalue	padj	hgnc_symbol	tissue1	tissue2
ensembl_gene_id	baseMean	log2FoldChange	lfcSE	stat	pvalue	padj	hgnc_symbol	tissue1	tissue2
ensembl_gene_id	baseMean	log2FoldChange	lfcSE	stat	pvalue	padj	hgnc_symbol	tissue1	tissue2
ensembl_gene_id	baseMean	log2FoldChange	lfcSE	stat	pvalue	padj	hgnc_symbol	tissue1	tissue2
ensembl_gene_id	baseMean	log2FoldChange	lfcSE	stat	pvalue	padj	hgnc_symbol	tissue1	tissue2
ensembl_gene_id	baseMean	log2FoldChange	lfcSE	stat	pvalue	padj	hgnc_symbol	tissue1	tissue2
ensembl_gene_id	baseMean	log2FoldChange	lfcSE	stat	pvalue	padj	hgnc_symbol	tissue1	tissue2
ensembl_gene_id	baseMean	log2FoldChange	lfcSE	stat	pvalue	padj	hgnc_symbol	tissue1	tissue2
ensembl_gene_id	baseMean	log2FoldChange	lfcSE	stat	pvalue	padj	hgnc_symbol	tissue1	tissue2
ensembl_gene_id	baseMean	log2FoldChange	lfcSE	stat	pvalue	padj	hgnc_symbol	tissue1	tissue2
ensembl_gene_id	baseMean	log2FoldChange	lfcSE	stat	pvalue	padj	hgnc_symbol	tissue1	tissue2
ensembl_gene_id	baseMean	log2FoldChange	lfcSE	stat	pvalue	padj	hgnc_symbol	tissue1	tissue2
ensembl_gene_id	baseMean	log2FoldChange	lfcSE	stat	pvalue	padj	hgnc_symbol	tissue1	tissue2
ensembl_gene_id	baseMean	log2FoldChange	lfcSE	stat	pvalue	padj	hgnc_symbol	tissue1	tissue2
ensembl_gene_id	baseMean	log2FoldChange	lfcSE	stat	pvalue	padj	hgnc_symbol	tissue1	tissue2
ensembl_gene_id	baseMean	log2FoldChange	lfcSE	stat	pvalue	padj	hgnc_symbol	tissue1	tissue2
ensembl_gene_id	baseMean	log2FoldChange	lfcSE	stat	pvalue	padj	hgnc_symbol	tissue1	tissue2
ensembl_gene_id	baseMean	log2FoldChange	lfcSE	stat	pvalue	padj	hgnc_symbol	tissue1	tissue2
ensembl_gene_id	baseMean	log2FoldChange	lfcSE	stat	pvalue	padj	hgnc_symbol	tissue1	tissue2
ensembl_gene_id	baseMean	log2FoldChange	lfcSE	stat	pvalue	padj	hgnc_symbol	tissue1	tissue2
ensembl_gene_id	baseMean	log2FoldChange	lfcSE	stat	pvalue	padj	hgnc_symbol	tissue1	tissue2
ensembl_gene_id	baseMean	log2FoldChange	lfcSE	stat	pvalue	padj	hgnc_symbol	tissue1	tissue2
ensembl_gene_id	baseMean	log2FoldChange	lfcSE	stat	pvalue	padj	hgnc_symbol	tissue1	tissue2
ensembl_gene_id	baseMean	log2FoldChange	lfcSE	stat	pvalue	padj	hgnc_symbol	tissue1	tissue2
ensembl_gene_id	baseMean	log2FoldChange	lfcSE	stat	pvalue	padj	hgnc_symbol	tissue1	tissue2
ensembl_gene_id	baseMean	log2FoldChange	lfcSE	stat	pvalue	padj	hgnc_symbol	tissue1	tissue2
ensembl_gene_id	baseMean	log2FoldChange	lfcSE	stat	pvalue	padj	hgnc_symbol	tissue1	tissue2
ensembl_gene_id	baseMean	log2FoldChange	lfcSE	stat	pvalue	padj	hgnc_symbol	tissue1	tissue2
ensembl_gene_id	baseMean	log2FoldChange	lfcSE	stat	pvalue	padj	hgnc_symbol	tissue1	tissue2
ensembl_gene_id	baseMean	log2FoldChange	lfcSE	stat	pvalue	padj	hgnc_symbol	tissue1	tissue2
ensembl_gene_id	baseMean	log2FoldChange	lfcSE	stat	pvalue	padj	hgnc_symbol	tissue1	tissue2
ensembl_gene_id	baseMean	log2FoldChange	lfcSE	stat	pvalue	padj	hgnc_symbol	tissue1	tissue2
ensembl_gene_id	baseMean	log2FoldChange	lfcSE	stat	pvalue	padj	hgnc_symbol	tissue1	tissue2
ensembl_gene_id	baseMean	log2FoldChange	lfcSE	stat	pvalue	padj	hgnc_symbol	tissue1	tissue2
ensembl_gene_id	baseMean	log2FoldChange	lfcSE	stat	pvalue	padj	hgnc_symbol	tissue1	tissue2
ensembl_gene_id	baseMean	log2FoldChange	lfcSE	stat	pvalue	padj	hgnc_symbol	tissue1	tissue2
ensembl_gene_id	baseMean	log2FoldChange	lfcSE	stat	pvalue	padj	hgnc_symbol	tissue1	tissue2
ensembl_gene_id	baseMean	log2FoldChange	lfcSE	stat	pvalue	padj	hgnc_symbol	tissue1	tissue2
ensembl_gene_id	baseMean	log2FoldChange	lfcSE	stat	pvalue	padj	hgnc_symbol	tissue1	tissue2
ensembl_gene_id	baseMean	log2FoldChange	lfcSE	stat	pvalue	padj	hgnc_symbol	tissue1	tissue2
ensembl_gene_id	baseMean	log2FoldChange	lfcSE	stat	pvalue	padj	hgnc_symbol	tissue1	tissue2
ensembl_gene_id	baseMean	log2FoldChange	lfcSE	stat	pvalue	padj	hgnc_symbol	tissue1	tissue2
ensembl_gene_id	baseMean	log2FoldChange	lfcSE	stat	pvalue	padj	hgnc_symbol	tissue1	tissue2
ensembl_gene_id	baseMean	log2FoldChange	lfcSE	stat	pvalue	padj	hgnc_symbol	tissue1	tissue2
ensembl_gene_id	baseMean	log2FoldChange	lfcSE	stat	pvalue	padj	hgnc_symbol	tissue1	tissue2
ensembl_gene_id	baseMean	log2FoldChange	lfcSE	stat	pvalue	padj	hgnc_symbol	tissue1	tissue2
ensembl_gene_id	baseMean	log2FoldChange	lfcSE	stat	pvalue	padj	hgnc_symbol	tissue1	tissue2
ensembl_gene_id	baseMean	log2FoldChange	lfcSE	stat	pvalue	padj	hgnc_symbol	tissue1	tissue2
ensembl_gene_id	baseMean	log2FoldChange	lfcSE	stat	pvalue	padj	hgnc_symbol	tissue1	tissue2
ensembl_gene_id	baseMean	log2FoldChange	lfcSE	stat	pvalue	padj	hgnc_symbol	tissue1	tissue2
ensembl_gene_id	baseMean	log2FoldChange	lfcSE	stat	pvalue	padj	hgnc_symbol	tissue1	tissue2
ensembl_gene_id	baseMean	log2FoldChange	lfcSE	stat	pvalue	padj	hgnc_symbol	tissue1	tissue2
ensembl_gene_id	baseMean	log2FoldChange	lfcSE	stat	pvalue	padj	hgnc_symbol	tissue1	tissue2
ensembl_gene_id	baseMean	log2FoldChange	lfcSE	stat	pvalue	padj	hgnc_symbol	tissue1	tissue2
ensembl_gene_id	baseMean	log2FoldChange	lfcSE	stat	pvalue	padj	hgnc_symbol	tissue1	tissue2
ensembl_gene_id	baseMean	log2FoldChange	lfcSE	stat	pvalue	padj	hgnc_symbol	tissue1	tissue2
ensembl_gene_id	baseMean	log2FoldChange	lfcSE	stat	pvalue	padj	hgnc_symbol	tissue1	tissue2
ensembl_gene_id	baseMean	log2FoldChange	lfcSE	stat	pvalue	padj	hgnc_symbol	tissue1	tissue2
ensembl_gene_id	baseMean	log2FoldChange	lfcSE	stat	pvalue	padj	hgnc_symbol	tissue1	tissue2
ensembl_gene_id	baseMean	log2FoldChange	lfcSE	stat	pvalue	padj	hgnc_symbol	tissue1	tissue2
ensembl_gene_id	baseMean	log2FoldChange	lfcSE	stat	pvalue	padj	hgnc_symbol	tissue1	tissue2
ensembl_gene_id	baseMean	log2FoldChange	lfcSE	stat	pvalue	padj	hgnc_symbol	tissue1	tissue2
ensembl_gene_id	baseMean	log2FoldChange	lfcSE	stat	pvalue	padj	hgnc_symbol	tissue1	tissue2
ensembl_gene_id	baseMean	log2FoldChange	lfcSE	stat	pvalue	padj	hgnc_symbol	tissue1	tissue2
ensembl_gene_id	baseMean	log2FoldChange	lfcSE	stat	pvalue	padj	hgnc_symbol	tissue1	tissue2
ensembl_gene_id	baseMean	log2FoldChange	lfcSE	stat	pvalue	padj	hgnc_symbol	tissue1	tissue2
ensembl_gene_id	baseMean	log2FoldChange	lfcSE	stat	pvalue	padj	hgnc_symbol	tissue1	tissue2
ensembl_gene_id	baseMean	log2FoldChange	lfcSE	stat	pvalue	padj	hgnc_symbol	tissue1	tissue2
ensembl_gene_id	baseMean	log2FoldChange	lfcSE	stat	pvalue	padj	hgnc_symbol	tissue1	tissue2
ensembl_gene_id	baseMean	log2FoldChange	lfcSE	stat	pvalue	padj	hgnc_symbol	tissue1	tissue2
ensembl_gene_id	baseMean	log2FoldChange	lfcSE	stat	pvalue	padj	hgnc_symbol	tissue1	tissue2
ensembl_gene_id	baseMean	log2FoldChange	lfcSE	stat	pvalue	padj	hgnc_symbol	tissue1	tissue2
ensembl_gene_id	baseMean	log2FoldChange	lfcSE	stat	pvalue	padj	hgnc_symbol	tissue1	tissue2
ensembl_gene_id	baseMean	log2FoldChange	lfcSE	stat	pvalue	padj	hgnc_symbol	tissue1	tissue2
ensembl_gene_id	baseMean	log2FoldChange	lfcSE	stat	pvalue	padj	hgnc_symbol	tissue1	tissue2
ensembl_gene_id	baseMean	log2FoldChange	lfcSE	stat	pvalue	padj	hgnc_symbol	tissue1	tissue2
ensembl_gene_id	baseMean	log2FoldChange	lfcSE	stat	pvalue	padj	hgnc_symbol	tissue1	tissue2
ensembl_gene_id	baseMean	log2FoldChange	lfcSE	stat	pvalue	padj	hgnc_symbol	tissue1	tissue2
ensembl_gene_id	baseMean	log2FoldChange	lfcSE	stat	pvalue	padj	hgnc_symbol	tissue1	tissue2
ensembl_gene_id	baseMean	log2FoldChange	lfcSE	stat	pvalue	padj	hgnc_symbol	tissue1	tissue2
ensembl_gene_id	baseMean	log2FoldChange	lfcSE	stat	pvalue	padj	hgnc_symbol	tissue1	tissue2
ensembl_gene_id	baseMean	log2FoldChange	lfcSE	stat	pvalue	padj	hgnc_symbol	tissue1	tissue2
ensembl_gene_id	baseMean	log2FoldChange	lfcSE	stat	pvalue	padj	hgnc_symbol	tissue1	tissue2
ensembl_gene_id	baseMean	log2FoldChange	lfcSE	stat	pvalue	padj	hgnc_symbol	tissue1	tissue2
ensembl_gene_id	baseMean	log2FoldChange	lfcSE	stat	pvalue	padj	hgnc_symbol	tissue1	tissue2
ensembl_gene_id	baseMean	log2FoldChange	lfcSE	stat	pvalue	padj	hgnc_symbol	tissue1	tissue2
ensembl_gene_id	baseMean	log2FoldChange	lfcSE	stat	pvalue	padj	hgnc_symbol	tissue1	tissue2
ensembl_gene_id	baseMean	log2FoldChange	lfcSE	stat	pvalue	padj	hgnc_symbol	tissue1	tissue2
ensembl_gene_id	baseMean	log2FoldChange	lfcSE	stat	pvalue	padj	hgnc_symbol	tissue1	tissue2
ensembl_gene_id	baseMean	log2FoldChange	lfcSE	stat	pvalue	padj	hgnc_symbol	tissue1	tissue2
ensembl_gene_id	baseMean	log2FoldChange	lfcSE	stat	pvalue	padj	hgnc_symbol	tissue1	tissue2
ensembl_gene_id	baseMean	log2FoldChange	lfcSE	stat	pvalue	padj	hgnc_symbol	tissue1	tissue2
ensembl_gene_id	baseMean	log2FoldChange	lfcSE	stat	pvalue	padj	hgnc_symbol	tissue1	tissue2
ensembl_gene_id	baseMean	log2FoldChange	lfcSE	stat	pvalue	padj	hgnc_symbol	tissue1	tissue2
ensembl_gene_id	baseMean	log2FoldChange	lfcSE	stat	pvalue	padj	hgnc_symbol	tissue1	tissue2
ensembl_gene_id	baseMean	log2FoldChange	lfcSE	stat	pvalue	padj	hgnc_symbol	tissue1	tissue2
ensembl_gene_id	baseMean	log2FoldChange	lfcSE	stat	pvalue	padj	hgnc_symbol	tissue1	tissue2
ensembl_gene_id	baseMean	log2FoldChange	lfcSE	stat	pvalue	padj	hgnc_symbol	tissue1	tissue2
ensembl_gene_id	baseMean	log2FoldChange	lfcSE	stat	pvalue	padj	hgnc_symbol	tissue1	tissue2
ensembl_gene_id	baseMean	log2FoldChange	lfcSE	stat	pvalue	padj	hgnc_symbol	tissue1	tissue2
ensembl_gene_id	baseMean	log2FoldChange	lfcSE	stat	pvalue	padj	hgnc_symbol	tissue1	tissue2
ensembl_gene_id	baseMean	log2FoldChange	lfcSE	stat	pvalue	padj	hgnc_symbol	tissue1	tissue2
ensembl_gene_id	baseMean	log2FoldChange	lfcSE	stat	pvalue	padj	hgnc_symbol	tissue1	tissue2
ensembl_gene_id	baseMean	log2FoldChange	lfcSE	stat	pvalue	padj	hgnc_symbol	tissue1	tissue2
ensembl_gene_id	baseMean	log2FoldChange	lfcSE	stat	pvalue	padj	hgnc_symbol	tissue1	tissue2
ensembl_gene_id	baseMean	log2FoldChange	lfcSE	stat	pvalue	padj	hgnc_symbol	tissue1	tissue2
ensembl_gene_id	baseMean	log2FoldChange	lfcSE	stat	pvalue	padj	hgnc_symbol	tissue1	tissue2
ensembl_gene_id	baseMean	log2FoldChange	lfcSE	stat	pvalue	padj	hgnc_symbol	tissue1	tissue2
ensembl_gene_id	baseMean	log2FoldChange	lfcSE	stat	pvalue	padj	hgnc_symbol	tissue1	tissue2
ensembl_gene_id	baseMean	log2FoldChange	lfcSE	stat	pvalue	padj	hgnc_symbol	tissue1	tissue2
ensembl_gene_id	baseMean	log2FoldChange	lfcSE	stat	pvalue	padj	hgnc_symbol	tissue1	tissue2
ensembl_gene_id	baseMean	log2FoldChange	lfcSE	stat	pvalue	padj	hgnc_symbol	tissue1	tissue2
ensembl_gene_id	baseMean	log2FoldChange	lfcSE	stat	pvalue	padj	hgnc_symbol	tissue1	tissue2
ensembl_gene_id	baseMean	log2FoldChange	lfcSE	stat	pvalue	padj	hgnc_symbol	tissue1	tissue2
ensembl_gene_id	baseMean	log2FoldChange	lfcSE	stat	pvalue	padj	hgnc_symbol	tissue1	tissue2
ensembl_gene_id	baseMean	log2FoldChange	lfcSE	stat	pvalue	padj	hgnc_symbol	tissue1	tissue2
ensembl_gene_id	baseMean	log2FoldChange	lfcSE	stat	pvalue	padj	hgnc_symbol	tissue1	tissue2
ensembl_gene_id	baseMean	log2FoldChange	lfcSE	stat	pvalue	padj	hgnc_symbol	tissue1	tissue2
ensembl_gene_id	baseMean	log2FoldChange	lfcSE	stat	pvalue	padj	hgnc_symbol	tissue1	tissue2
ensembl_gene_id	baseMean	log2FoldChange	lfcSE	stat	pvalue	padj	hgnc_symbol	tissue1	tissue2
ensembl_gene_id	baseMean	log2FoldChange	lfcSE	stat	pvalue	padj	hgnc_symbol	tissue1	tissue2
ensembl_gene_id	baseMean	log2FoldChange	lfcSE	stat	pvalue	padj	hgnc_symbol	tissue1	tissue2
ensembl_gene_id	baseMean	log2FoldChange	lfcSE	stat	pvalue	padj	hgnc_symbol	tissue1	tissue2
ensembl_gene_id	baseMean	log2FoldChange	lfcSE	stat	pvalue	padj	hgnc_symbol	tissue1	tissue2
ensembl_gene_id	baseMean	log2FoldChange	lfcSE	stat	pvalue	padj	hgnc_symbol	tissue1	tissue2
ensembl_gene_id	baseMean	log2FoldChange	lfcSE	stat	pvalue	padj	hgnc_symbol	tissue1	tissue2
ensembl_gene_id	baseMean	log2FoldChange	lfcSE	stat	pvalue	padj	hgnc_symbol	tissue1	tissue2
ensembl_gene_id	baseMean	log2FoldChange	lfcSE	stat	pvalue	padj	hgnc_symbol	tissue1	tissue2
ensembl_gene_id	baseMean	log2FoldChange	lfcSE	stat	pvalue	padj	hgnc_symbol	tissue1	tissue2
ensembl_gene_id	baseMean	log2FoldChange	lfcSE	stat	pvalue	padj	hgnc_symbol	tissue1	tissue2
ensembl_gene_id	baseMean	log2FoldChange	lfcSE	stat	pvalue	padj	hgnc_symbol	tissue1	tissue2
ensembl_gene_id	baseMean	log2FoldChange	lfcSE	stat	pvalue	padj	hgnc_symbol	tissue1	tissue2
ensembl_gene_id	baseMean	log2FoldChange	lfcSE	stat	pvalue	padj	hgnc_symbol	tissue1	tissue2
ensembl_gene_id	baseMean	log2FoldChange	lfcSE	stat	pvalue	padj	hgnc_symbol	tissue1	tissue2
ensembl_gene_id	baseMean	log2FoldChange	lfcSE	stat	pvalue	padj	hgnc_symbol	tissue1	tissue2
ensembl_gene_id	baseMean	log2FoldChange	lfcSE	stat	pvalue	padj	hgnc_symbol	tissue1	tissue2
ensembl_gene_id	baseMean	log2FoldChange	lfcSE	stat	pvalue	padj	hgnc_symbol	tissue1	tissue2
ensembl_gene_id	baseMean	log2FoldChange	lfcSE	stat	pvalue	padj	hgnc_symbol	tissue1	tissue2
ensembl_gene_id	baseMean	log2FoldChange	lfcSE	stat	pvalue	padj	hgnc_symbol	tissue1	tissue2
ensembl_gene_id	baseMean	log2FoldChange	lfcSE	stat	pvalue	padj	hgnc_symbol	tissue1	tissue2
ensembl_gene_id	baseMean	log2FoldChange	lfcSE	stat	pvalue	padj	hgnc_symbol	tissue1	tissue2
ensembl_gene_id	baseMean	log2FoldChange	lfcSE	stat	pvalue	padj	hgnc_symbol	tissue1	tissue2
ensembl_gene_id	baseMean	log2FoldChange	lfcSE	stat	pvalue	padj	hgnc_symbol	tissue1	tissue2
ensembl_gene_id	baseMean	log2FoldChange	lfcSE	stat	pvalue	padj	hgnc_symbol	tissue1	tissue2
ensembl_gene_id	baseMean	log2FoldChange	lfcSE	stat	pvalue	padj	hgnc_symbol	tissue1	tissue2
ensembl_gene_id	baseMean	log2FoldChange	lfcSE	stat	pvalue	padj	hgnc_symbol	tissue1	tissue2
ensembl_gene_id	baseMean	log2FoldChange	lfcSE	stat	pvalue	padj	hgnc_symbol	tissue1	tissue2
ensembl_gene_id	baseMean	log2FoldChange	lfcSE	stat	pvalue	padj	hgnc_symbol	tissue1	tissue2
ensembl_gene_id	baseMean	log2FoldChange	lfcSE	stat	pvalue	padj	hgnc_symbol	tissue1	tissue2
ensembl_gene_id	baseMean	log2FoldChange	lfcSE	stat	pvalue	padj	hgnc_symbol	tissue1	tissue2
ensembl_gene_id	baseMean	log2FoldChange	lfcSE	stat	pvalue	padj	hgnc_symbol	tissue1	tissue2
ensembl_gene_id	baseMean	log2FoldChange	lfcSE	stat	pvalue	padj	hgnc_symbol	tissue1	tissue2
ensembl_gene_id	baseMean	log2FoldChange	lfcSE	stat	pvalue	padj	hgnc_symbol	tissue1	tissue2
ensembl_gene_id	baseMean	log2FoldChange	lfcSE	stat	pvalue	padj	hgnc_symbol	tissue1	tissue2
ensembl_gene_id	baseMean	log2FoldChange	lfcSE	stat	pvalue	padj	hgnc_symbol	tissue1	tissue2
ensembl_gene_id	baseMean	log2FoldChange	lfcSE	stat	pvalue	padj	hgnc_symbol	tissue1	tissue2
ensembl_gene_id	baseMean	log2FoldChange	lfcSE	stat	pvalue	padj	hgnc_symbol	tissue1	tissue2
ensembl_gene_id	baseMean	log2FoldChange	lfcSE	stat	pvalue	padj	hgnc_symbol	tissue1	tissue2
ensembl_gene_id	baseMean	log2FoldChange	lfcSE	stat	pvalue	padj	hgnc_symbol	tissue1	tissue2
ensembl_gene_id	baseMean	log2FoldChange	lfcSE	stat	pvalue	padj	hgnc_symbol	tissue1	tissue2
ensembl_gene_id	baseMean	log2FoldChange	lfcSE	stat	pvalue	padj	hgnc_symbol	tissue1	tissue2
ensembl_gene_id	baseMean	log2FoldChange	lfcSE	stat	pvalue	padj	hgnc_symbol	tissue1	tissue2
ensembl_gene_id	baseMean	log2FoldChange	lfcSE	stat	pvalue	padj	hgnc_symbol	tissue1	tissue2
ensembl_gene_id	baseMean	log2FoldChange	lfcSE	stat	pvalue	padj	hgnc_symbol	tissue1	tissue2
ensembl_gene_id	baseMean	log2FoldChange	lfcSE	stat	pvalue	padj	hgnc_symbol	tissue1	tissue2
ensembl_gene_id	baseMean	log2FoldChange	lfcSE	stat	pvalue	padj	hgnc_symbol	tissue1	tissue2
ensembl_gene_id	baseMean	log2FoldChange	lfcSE	stat	pvalue	padj	hgnc_symbol	tissue1	tissue2
ensembl_gene_id	baseMean	log2FoldChange	lfcSE	stat	pvalue	padj	hgnc_symbol	tissue1	tissue2
ensembl_gene_id	baseMean	log2FoldChange	lfcSE	stat	pvalue	padj	hgnc_symbol	tissue1	tissue2
ensembl_gene_id	baseMean	log2FoldChange	lfcSE	stat	pvalue	padj	hgnc_symbol	tissue1	tissue2
ensembl_gene_id	baseMean	log2FoldChange	lfcSE	stat	pvalue	padj	hgnc_symbol	tissue1	tissue2
ensembl_gene_id	baseMean	log2FoldChange	lfcSE	stat	pvalue	padj	hgnc_symbol	tissue1	tissue2
ensembl_gene_id	baseMean	log2FoldChange	lfcSE	stat	pvalue	padj	hgnc_symbol	tissue1	tissue2
ensembl_gene_id	baseMean	log2FoldChange	lfcSE	stat	pvalue	padj	hgnc_symbol	tissue1	tissue2
ensembl_gene_id	baseMean	log2FoldChange	lfcSE	stat	pvalue	padj	hgnc_symbol	tissue1	tissue2
ensembl_gene_id	baseMean	log2FoldChange	lfcSE	stat	pvalue	padj	hgnc_symbol	tissue1	tissue2
ensembl_gene_id	baseMean	log2FoldChange	lfcSE	stat	pvalue	padj	hgnc_symbol	tissue1	tissue2
ensembl_gene_id	baseMean	log2FoldChange	lfcSE	stat	pvalue	padj	hgnc_symbol	tissue1	tissue2
ensembl_gene_id	baseMean	log2FoldChange	lfcSE	stat	pvalue	padj	hgnc_symbol	tissue1	tissue2
ensembl_gene_id	baseMean	log2FoldChange	lfcSE	stat	pvalue	padj	hgnc_symbol	tissue1	tissue2
ensembl_gene_id	baseMean	log2FoldChange	lfcSE	stat	pvalue	padj	hgnc_symbol	tissue1	tissue2
ensembl_gene_id	baseMean	log2FoldChange	lfcSE	stat	pvalue	padj	hgnc_symbol	tissue1	tissue2
ensembl_gene_id	baseMean	log2FoldChange	lfcSE	stat	pvalue	padj	hgnc_symbol	tissue1	tissue2
ensembl_gene_id	baseMean	log2FoldChange	lfcSE	stat	pvalue	padj	hgnc_symbol	tissue1	tissue2
ensembl_gene_id	baseMean	log2FoldChange	lfcSE	stat	pvalue	padj	hgnc_symbol	tissue1	tissue2
ensembl_gene_id	baseMean	log2FoldChange	lfcSE	stat	pvalue	padj	hgnc_symbol	tissue1	tissue2
ensembl_gene_id	baseMean	log2FoldChange	lfcSE	stat	pvalue	padj	hgnc_symbol	tissue1	tissue2
ensembl_gene_id	baseMean	log2FoldChange	lfcSE	stat	pvalue	padj	hgnc_symbol	tissue1	tissue2
ensembl_gene_id	baseMean	log2FoldChange	lfcSE	stat	pvalue	padj	hgnc_symbol	tissue1	tissue2
ensembl_gene_id	baseMean	log2FoldChange	lfcSE	stat	pvalue	padj	hgnc_symbol	tissue1	tissue2
ensembl_gene_id	baseMean	log2FoldChange	lfcSE	stat	pvalue	padj	hgnc_symbol	tissue1	tissue2
ensembl_gene_id	baseMean	log2FoldChange	lfcSE	stat	pvalue	padj	hgnc_symbol	tissue1	tissue2
ensembl_gene_id	baseMean	log2FoldChange	lfcSE	stat	pvalue	padj	hgnc_symbol	tissue1	tissue2
ensembl_gene_id	baseMean	log2FoldChange	lfcSE	stat	pvalue	padj	hgnc_symbol	tissue1	tissue2
ensembl_gene_id	baseMean	log2FoldChange	lfcSE	stat	pvalue	padj	hgnc_symbol	tissue1	tissue2
ensembl_gene_id	baseMean	log2FoldChange	lfcSE	stat	pvalue	padj	hgnc_symbol	tissue1	tissue2
ensembl_gene_id	baseMean	log2FoldChange	lfcSE	stat	pvalue	padj	hgnc_symbol	tissue1	tissue2
ensembl_gene_id	baseMean	log2FoldChange	lfcSE	stat	pvalue	padj	hgnc_symbol	tissue1	tissue2
ensembl_gene_id	baseMean	log2FoldChange	lfcSE	stat	pvalue	padj	hgnc_symbol	tissue1	tissue2
ensembl_gene_id	baseMean	log2FoldChange	lfcSE	stat	pvalue	padj	hgnc_symbol	tissue1	tissue2
ensembl_gene_id	baseMean	log2FoldChange	lfcSE	stat	pvalue	padj	hgnc_symbol	tissue1	tissue2
ensembl_gene_id	baseMean	log2FoldChange	lfcSE	stat	pvalue	padj	hgnc_symbol	tissue1	tissue2
ensembl_gene_id	baseMean	log2FoldChange	lfcSE	stat	pvalue	padj	hgnc_symbol	tissue1	tissue2
ensembl_gene_id	baseMean	log2FoldChange	lfcSE	stat	pvalue	padj	hgnc_symbol	tissue1	tissue2
ensembl_gene_id	baseMean	log2FoldChange	lfcSE	stat	pvalue	padj	hgnc_symbol	tissue1	tissue2
ensembl_gene_id	baseMean	log2FoldChange	lfcSE	stat	pvalue	padj	hgnc_symbol	tissue1	tissue2
ensembl_gene_id	baseMean	log2FoldChange	lfcSE	stat	pvalue	padj	hgnc_symbol	tissue1	tissue2
ensembl_gene_id	baseMean	log2FoldChange	lfcSE	stat	pvalue	padj	hgnc_symbol	tissue1	tissue2
ensembl_gene_id	baseMean	log2FoldChange	lfcSE	stat	pvalue	padj	hgnc_symbol	tissue1	tissue2
ensembl_gene_id	baseMean	log2FoldChange	lfcSE	stat	pvalue	padj	hgnc_symbol	tissue1	tissue2
ensembl_gene_id	baseMean	log2FoldChange	lfcSE	stat	pvalue	padj	hgnc_symbol	tissue1	tissue2
ensembl_gene_id	baseMean	log2FoldChange	lfcSE	stat	pvalue	padj	hgnc_symbol	tissue1	tissue2
ensembl_gene_id	baseMean	log2FoldChange	lfcSE	stat	pvalue	padj	hgnc_symbol	tissue1	tissue2
ensembl_gene_id	baseMean	log2FoldChange	lfcSE	stat	pvalue	padj	hgnc_symbol	tissue1	tissue2
ensembl_gene_id	baseMean	log2FoldChange	lfcSE	stat	pvalue	padj	hgnc_symbol	tissue1	tissue2
ensembl_gene_id	baseMean	log2FoldChange	lfcSE	stat	pvalue	padj	hgnc_symbol	tissue1	tissue2
ensembl_gene_id	baseMean	log2FoldChange	lfcSE	stat	pvalue	padj	hgnc_symbol	tissue1	tissue2
ensembl_gene_id	baseMean	log2FoldChange	lfcSE	stat	pvalue	padj	hgnc_symbol	tissue1	tissue2
ensembl_gene_id	baseMean	log2FoldChange	lfcSE	stat	pvalue	padj	hgnc_symbol	tissue1	tissue2
ensembl_gene_id	baseMean	log2FoldChange	lfcSE	stat	pvalue	padj	hgnc_symbol	tissue1	tissue2
ensembl_gene_id	baseMean	log2FoldChange	lfcSE	stat	pvalue	padj	hgnc_symbol	tissue1	tissue2
ensembl_gene_id	baseMean	log2FoldChange	lfcSE	stat	pvalue	padj	hgnc_symbol	tissue1	tissue2
ensembl_gene_id	baseMean	log2FoldChange	lfcSE	stat	pvalue	padj	hgnc_symbol	tissue1	tissue2
ensembl_gene_id	baseMean	log2FoldChange	lfcSE	stat	pvalue	padj	hgnc_symbol	tissue1	tissue2
ensembl_gene_id	baseMean	log2FoldChange	lfcSE	stat	pvalue	padj	hgnc_symbol	tissue1	tissue2
ensembl_gene_id	baseMean	log2FoldChange	lfcSE	stat	pvalue	padj	hgnc_symbol	tissue1	tissue2
ensembl_gene_id	baseMean	log2FoldChange	lfcSE	stat	pvalue	padj	hgnc_symbol	tissue1	tissue2
ensembl_gene_id	baseMean	log2FoldChange	lfcSE	stat	pvalue	padj	hgnc_symbol	tissue1	tissue2
ensembl_gene_id	baseMean	log2FoldChange	lfcSE	stat	pvalue	padj	hgnc_symbol	tissue1	tissue2
ensembl_gene_id	baseMean	log2FoldChange	lfcSE	stat	pvalue	padj	hgnc_symbol	tissue1	tissue2
ensembl_gene_id	baseMean	log2FoldChange	lfcSE	stat	pvalue	padj	hgnc_symbol	tissue1	tissue2
ensembl_gene_id	baseMean	log2FoldChange	lfcSE	stat	pvalue	padj	hgnc_symbol	tissue1	tissue2
ensembl_gene_id	baseMean	log2FoldChange	lfcSE	stat	pvalue	padj	hgnc_symbol	tissue1	tissue2
ensembl_gene_id	baseMean	log2FoldChange	lfcSE	stat	pvalue	padj	hgnc_symbol	tissue1	tissue2
ensembl_gene_id	baseMean	log2FoldChange	lfcSE	stat	pvalue	padj	hgnc_symbol	tissue1	tissue2
ensembl_gene_id	baseMean	log2FoldChange	lfcSE	stat	pvalue	padj	hgnc_symbol	tissue1	tissue2
ensembl_gene_id	baseMean	log2FoldChange	lfcSE	stat	pvalue	padj	hgnc_symbol	tissue1	tissue2
ensembl_gene_id	baseMean	log2FoldChange	lfcSE	stat	pvalue	padj	hgnc_symbol	tissue1	tissue2
ensembl_gene_id	baseMean	log2FoldChange	lfcSE	stat	pvalue	padj	hgnc_symbol	tissue1	tissue2
ensembl_gene_id	baseMean	log2FoldChange	lfcSE	stat	pvalue	padj	hgnc_symbol	tissue1	tissue2
ensembl_gene_id	baseMean	log2FoldChange	lfcSE	stat	pvalue	padj	hgnc_symbol	tissue1	tissue2
ensembl_gene_id	baseMean	log2FoldChange	lfcSE	stat	pvalue	padj	hgnc_symbol	tissue1	tissue2
ensembl_gene_id	baseMean	log2FoldChange	lfcSE	stat	pvalue	padj	hgnc_symbol	tissue1	tissue2
ensembl_gene_id	baseMean	log2FoldChange	lfcSE	stat	pvalue	padj	hgnc_symbol	tissue1	tissue2
ensembl_gene_id	baseMean	log2FoldChange	lfcSE	stat	pvalue	padj	hgnc_symbol	tissue1	tissue2
ensembl_gene_id	baseMean	log2FoldChange	lfcSE	stat	pvalue	padj	hgnc_symbol	tissue1	tissue2
ensembl_gene_id	baseMean	log2FoldChange	lfcSE	stat	pvalue	padj	hgnc_symbol	tissue1	tissue2
ensembl_gene_id	baseMean	log2FoldChange	lfcSE	stat	pvalue	padj	hgnc_symbol	tissue1	tissue2
ensembl_gene_id	baseMean	log2FoldChange	lfcSE	stat	pvalue	padj	hgnc_symbol	tissue1	tissue2
ensembl_gene_id	baseMean	log2FoldChange	lfcSE	stat	pvalue	padj	hgnc_symbol	tissue1	tissue2
ensembl_gene_id	baseMean	log2FoldChange	lfcSE	stat	pvalue	padj	hgnc_symbol	tissue1	tissue2
ensembl_gene_id	baseMean	log2FoldChange	lfcSE	stat	pvalue	padj	hgnc_symbol	tissue1	tissue2
ensembl_gene_id	baseMean	log2FoldChange	lfcSE	stat	pvalue	padj	hgnc_symbol	tissue1	tissue2
ensembl_gene_id	baseMean	log2FoldChange	lfcSE	stat	pvalue	padj	hgnc_symbol	tissue1	tissue2
ensembl_gene_id	baseMean	log2FoldChange	lfcSE	stat	pvalue	padj	hgnc_symbol	tissue1	tissue2
ensembl_gene_id	baseMean	log2FoldChange	lfcSE	stat	pvalue	padj	hgnc_symbol	tissue1	tissue2
ensembl_gene_id	baseMean	log2FoldChange	lfcSE	stat	pvalue	padj	hgnc_symbol	tissue1	tissue2
ensembl_gene_id	baseMean	log2FoldChange	lfcSE	stat	pvalue	padj	hgnc_symbol	tissue1	tissue2
ensembl_gene_id	baseMean	log2FoldChange	lfcSE	stat	pvalue	padj	hgnc_symbol	tissue1	tissue2
ensembl_gene_id	baseMean	log2FoldChange	lfcSE	stat	pvalue	padj	hgnc_symbol	tissue1	tissue2
ensembl_gene_id	baseMean	log2FoldChange	lfcSE	stat	pvalue	padj	hgnc_symbol	tissue1	tissue2
ensembl_gene_id	baseMean	log2FoldChange	lfcSE	stat	pvalue	padj	hgnc_symbol	tissue1	tissue2
ensembl_gene_id	baseMean	log2FoldChange	lfcSE	stat	pvalue	padj	hgnc_symbol	tissue1	tissue2
ensembl_gene_id	baseMean	log2FoldChange	lfcSE	stat	pvalue	padj	hgnc_symbol	tissue1	tissue2
ensembl_gene_id	baseMean	log2FoldChange	lfcSE	stat	pvalue	padj	hgnc_symbol	tissue1	tissue2
ensembl_gene_id	baseMean	log2FoldChange	lfcSE	stat	pvalue	padj	hgnc_symbol	tissue1	tissue2
ensembl_gene_id	baseMean	log2FoldChange	lfcSE	stat	pvalue	padj	hgnc_symbol	tissue1	tissue2
ensembl_gene_id	baseMean	log2FoldChange	lfcSE	stat	pvalue	padj	hgnc_symbol	tissue1	tissue2
ensembl_gene_id	baseMean	log2FoldChange	lfcSE	stat	pvalue	padj	hgnc_symbol	tissue1	tissue2
ensembl_gene_id	baseMean	log2FoldChange	lfcSE	stat	pvalue	padj	hgnc_symbol	tissue1	tissue2
ensembl_gene_id	baseMean	log2FoldChange	lfcSE	stat	pvalue	padj	hgnc_symbol	tissue1	tissue2
ensembl_gene_id	baseMean	log2FoldChange	lfcSE	stat	pvalue	padj	hgnc_symbol	tissue1	tissue2
ensembl_gene_id	baseMean	log2FoldChange	lfcSE	stat	pvalue	padj	hgnc_symbol	tissue1	tissue2
ensembl_gene_id	baseMean	log2FoldChange	lfcSE	stat	pvalue	padj	hgnc_symbol	tissue1	tissue2
ensembl_gene_id	baseMean	log2FoldChange	lfcSE	stat	pvalue	padj	hgnc_symbol	tissue1	tissue2
ensembl_gene_id	baseMean	log2FoldChange	lfcSE	stat	pvalue	padj	hgnc_symbol	tissue1	tissue2
ensembl_gene_id	baseMean	log2FoldChange	lfcSE	stat	pvalue	padj	hgnc_symbol	tissue1	tissue2
ensembl_gene_id	baseMean	log2FoldChange	lfcSE	stat	pvalue	padj	hgnc_symbol	tissue1	tissue2
ensembl_gene_id	baseMean	log2FoldChange	lfcSE	stat	pvalue	padj	hgnc_symbol	tissue1	tissue2
ensembl_gene_id	baseMean	log2FoldChange	lfcSE	stat	pvalue	padj	hgnc_symbol	tissue1	tissue2
ensembl_gene_id	baseMean	log2FoldChange	lfcSE	stat	pvalue	padj	hgnc_symbol	tissue1	tissue2
ensembl_gene_id	baseMean	log2FoldChange	lfcSE	stat	pvalue	padj	hgnc_symbol	tissue1	tissue2
ensembl_gene_id	baseMean	log2FoldChange	lfcSE	stat	pvalue	padj	hgnc_symbol	tissue1	tissue2
ensembl_gene_id	baseMean	log2FoldChange	lfcSE	stat	pvalue	padj	hgnc_symbol	tissue1	tissue2
ensembl_gene_id	baseMean	log2FoldChange	lfcSE	stat	pvalue	padj	hgnc_symbol	tissue1	tissue2
ensembl_gene_id	baseMean	log2FoldChange	lfcSE	stat	pvalue	padj	hgnc_symbol	tissue1	tissue2
ensembl_gene_id	baseMean	log2FoldChange	lfcSE	stat	pvalue	padj	hgnc_symbol	tissue1	tissue2
ensembl_gene_id	baseMean	log2FoldChange	lfcSE	stat	pvalue	padj	hgnc_symbol	tissue1	tissue2
ensembl_gene_id	baseMean	log2FoldChange	lfcSE	stat	pvalue	padj	hgnc_symbol	tissue1	tissue2
ensembl_gene_id	baseMean	log2FoldChange	lfcSE	stat	pvalue	padj	hgnc_symbol	tissue1	tissue2
ensembl_gene_id	baseMean	log2FoldChange	lfcSE	stat	pvalue	padj	hgnc_symbol	tissue1	tissue2
ensembl_gene_id	baseMean	log2FoldChange	lfcSE	stat	pvalue	padj	hgnc_symbol	tissue1	tissue2
ensembl_gene_id	baseMean	log2FoldChange	lfcSE	stat	pvalue	padj	hgnc_symbol	tissue1	tissue2
ensembl_gene_id	baseMean	log2FoldChange	lfcSE	stat	pvalue	padj	hgnc_symbol	tissue1	tissue2
ensembl_gene_id	baseMean	log2FoldChange	lfcSE	stat	pvalue	padj	hgnc_symbol	tissue1	tissue2
ensembl_gene_id	baseMean	log2FoldChange	lfcSE	stat	pvalue	padj	hgnc_symbol	tissue1	tissue2
ensembl_gene_id	baseMean	log2FoldChange	lfcSE	stat	pvalue	padj	hgnc_symbol	tissue1	tissue2
ensembl_gene_id	baseMean	log2FoldChange	lfcSE	stat	pvalue	padj	hgnc_symbol	tissue1	tissue2
ensembl_gene_id	baseMean	log2FoldChange	lfcSE	stat	pvalue	padj	hgnc_symbol	tissue1	tissue2
ensembl_gene_id	baseMean	log2FoldChange	lfcSE	stat	pvalue	padj	hgnc_symbol	tissue1	tissue2
ensembl_gene_id	baseMean	log2FoldChange	lfcSE	stat	pvalue	padj	hgnc_symbol	tissue1	tissue2
ensembl_gene_id	baseMean	log2FoldChange	lfcSE	stat	pvalue	padj	hgnc_symbol	tissue1	tissue2
ensembl_gene_id	baseMean	log2FoldChange	lfcSE	stat	pvalue	padj	hgnc_symbol	tissue1	tissue2
ensembl_gene_id	baseMean	log2FoldChange	lfcSE	stat	pvalue	padj	hgnc_symbol	tissue1	tissue2
ensembl_gene_id	baseMean	log2FoldChange	lfcSE	stat	pvalue	padj	hgnc_symbol	tissue1	tissue2
ensembl_gene_id	baseMean	log2FoldChange	lfcSE	stat	pvalue	padj	hgnc_symbol	tissue1	tissue2
ensembl_gene_id	baseMean	log2FoldChange	lfcSE	stat	pvalue	padj	hgnc_symbol	tissue1	tissue2
ensembl_gene_id	baseMean	log2FoldChange	lfcSE	stat	pvalue	padj	hgnc_symbol	tissue1	tissue2
ensembl_gene_id	baseMean	log2FoldChange	lfcSE	stat	pvalue	padj	hgnc_symbol	tissue1	tissue2
ensembl_gene_id	baseMean	log2FoldChange	lfcSE	stat	pvalue	padj	hgnc_symbol	tissue1	tissue2
ensembl_gene_id	baseMean	log2FoldChange	lfcSE	stat	pvalue	padj	hgnc_symbol	tissue1	tissue2
ensembl_gene_id	baseMean	log2FoldChange	lfcSE	stat	pvalue	padj	hgnc_symbol	tissue1	tissue2
ensembl_gene_id	baseMean	log2FoldChange	lfcSE	stat	pvalue	padj	hgnc_symbol	tissue1	tissue2
ensembl_gene_id	baseMean	log2FoldChange	lfcSE	stat	pvalue	padj	hgnc_symbol	tissue1	tissue2
ensembl_gene_id	baseMean	log2FoldChange	lfcSE	stat	pvalue	padj	hgnc_symbol	tissue1	tissue2
ensembl_gene_id	baseMean	log2FoldChange	lfcSE	stat	pvalue	padj	hgnc_symbol	tissue1	tissue2
ensembl_gene_id	baseMean	log2FoldChange	lfcSE	stat	pvalue	padj	hgnc_symbol	tissue1	tissue2
ensembl_gene_id	baseMean	log2FoldChange	lfcSE	stat	pvalue	padj	hgnc_symbol	tissue1	tissue2
ensembl_gene_id	baseMean	log2FoldChange	lfcSE	stat	pvalue	padj	hgnc_symbol	tissue1	tissue2
ensembl_gene_id	baseMean	log2FoldChange	lfcSE	stat	pvalue	padj	hgnc_symbol	tissue1	tissue2
ensembl_gene_id	baseMean	log2FoldChange	lfcSE	stat	pvalue	padj	hgnc_symbol	tissue1	tissue2
ensembl_gene_id	baseMean	log2FoldChange	lfcSE	stat	pvalue	padj	hgnc_symbol	tissue1	tissue2
ensembl_gene_id	baseMean	log2FoldChange	lfcSE	stat	pvalue	padj	hgnc_symbol	tissue1	tissue2
ensembl_gene_id	baseMean	log2FoldChange	lfcSE	stat	pvalue	padj	hgnc_symbol	tissue1	tissue2
ensembl_gene_id	baseMean	log2FoldChange	lfcSE	stat	pvalue	padj	hgnc_symbol	tissue1	tissue2
ensembl_gene_id	baseMean	log2FoldChange	lfcSE	stat	pvalue	padj	hgnc_symbol	tissue1	tissue2
ensembl_gene_id	baseMean	log2FoldChange	lfcSE	stat	pvalue	padj	hgnc_symbol	tissue1	tissue2
ensembl_gene_id	baseMean	log2FoldChange	lfcSE	stat	pvalue	padj	hgnc_symbol	tissue1	tissue2
ensembl_gene_id	baseMean	log2FoldChange	lfcSE	stat	pvalue	padj	hgnc_symbol	tissue1	tissue2
ensembl_gene_id	baseMean	log2FoldChange	lfcSE	stat	pvalue	padj	hgnc_symbol	tissue1	tissue2
ensembl_gene_id	baseMean	log2FoldChange	lfcSE	stat	pvalue	padj	hgnc_symbol	tissue1	tissue2
ensembl_gene_id	baseMean	log2FoldChange	lfcSE	stat	pvalue	padj	hgnc_symbol	tissue1	tissue2
ensembl_gene_id	baseMean	log2FoldChange	lfcSE	stat	pvalue	padj	hgnc_symbol	tissue1	tissue2
ensembl_gene_id	baseMean	log2FoldChange	lfcSE	stat	pvalue	padj	hgnc_symbol	tissue1	tissue2
ensembl_gene_id	baseMean	log2FoldChange	lfcSE	stat	pvalue	padj	hgnc_symbol	tissue1	tissue2
ensembl_gene_id	baseMean	log2FoldChange	lfcSE	stat	pvalue	padj	hgnc_symbol	tissue1	tissue2
ensembl_gene_id	baseMean	log2FoldChange	lfcSE	stat	pvalue	padj	hgnc_symbol	tissue1	tissue2
ensembl_gene_id	baseMean	log2FoldChange	lfcSE	stat	pvalue	padj	hgnc_symbol	tissue1	tissue2
ensembl_gene_id	baseMean	log2FoldChange	lfcSE	stat	pvalue	padj	hgnc_symbol	tissue1	tissue2
ensembl_gene_id	baseMean	log2FoldChange	lfcSE	stat	pvalue	padj	hgnc_symbol	tissue1	tissue2
ensembl_gene_id	baseMean	log2FoldChange	lfcSE	stat	pvalue	padj	hgnc_symbol	tissue1	tissue2
ensembl_gene_id	baseMean	log2FoldChange	lfcSE	stat	pvalue	padj	hgnc_symbol	tissue1	tissue2
ensembl_gene_id	baseMean	log2FoldChange	lfcSE	stat	pvalue	padj	hgnc_symbol	tissue1	tissue2
ensembl_gene_id	baseMean	log2FoldChange	lfcSE	stat	pvalue	padj	hgnc_symbol	tissue1	tissue2
ensembl_gene_id	baseMean	log2FoldChange	lfcSE	stat	pvalue	padj	hgnc_symbol	tissue1	tissue2
ensembl_gene_id	baseMean	log2FoldChange	lfcSE	stat	pvalue	padj	hgnc_symbol	tissue1	tissue2
ensembl_gene_id	baseMean	log2FoldChange	lfcSE	stat	pvalue	padj	hgnc_symbol	tissue1	tissue2
ensembl_gene_id	baseMean	log2FoldChange	lfcSE	stat	pvalue	padj	hgnc_symbol	tissue1	tissue2
ensembl_gene_id	baseMean	log2FoldChange	lfcSE	stat	pvalue	padj	hgnc_symbol	tissue1	tissue2
ensembl_gene_id	baseMean	log2FoldChange	lfcSE	stat	pvalue	padj	hgnc_symbol	tissue1	tissue2
ensembl_gene_id	baseMean	log2FoldChange	lfcSE	stat	pvalue	padj	hgnc_symbol	tissue1	tissue2
ensembl_gene_id	baseMean	log2FoldChange	lfcSE	stat	pvalue	padj	hgnc_symbol	tissue1	tissue2
ensembl_gene_id	baseMean	log2FoldChange	lfcSE	stat	pvalue	padj	hgnc_symbol	tissue1	tissue2
ensembl_gene_id	baseMean	log2FoldChange	lfcSE	stat	pvalue	padj	hgnc_symbol	tissue1	tissue2
ensembl_gene_id	baseMean	log2FoldChange	lfcSE	stat	pvalue	padj	hgnc_symbol	tissue1	tissue2
ensembl_gene_id	baseMean	log2FoldChange	lfcSE	stat	pvalue	padj	hgnc_symbol	tissue1	tissue2
ensembl_gene_id	baseMean	log2FoldChange	lfcSE	stat	pvalue	padj	hgnc_symbol	tissue1	tissue2
ensembl_gene_id	baseMean	log2FoldChange	lfcSE	stat	pvalue	padj	hgnc_symbol	tissue1	tissue2
ensembl_gene_id	baseMean	log2FoldChange	lfcSE	stat	pvalue	padj	hgnc_symbol	tissue1	tissue2
ensembl_gene_id	baseMean	log2FoldChange	lfcSE	stat	pvalue	padj	hgnc_symbol	tissue1	tissue2
ensembl_gene_id	baseMean	log2FoldChange	lfcSE	stat	pvalue	padj	hgnc_symbol	tissue1	tissue2
ensembl_gene_id	baseMean	log2FoldChange	lfcSE	stat	pvalue	padj	hgnc_symbol	tissue1	tissue2
ensembl_gene_id	baseMean	log2FoldChange	lfcSE	stat	pvalue	padj	hgnc_symbol	tissue1	tissue2
ensembl_gene_id	baseMean	log2FoldChange	lfcSE	stat	pvalue	padj	hgnc_symbol	tissue1	tissue2
ensembl_gene_id	baseMean	log2FoldChange	lfcSE	stat	pvalue	padj	hgnc_symbol	tissue1	tissue2
ensembl_gene_id	baseMean	log2FoldChange	lfcSE	stat	pvalue	padj	hgnc_symbol	tissue1	tissue2
ensembl_gene_id	baseMean	log2FoldChange	lfcSE	stat	pvalue	padj	hgnc_symbol	tissue1	tissue2
ensembl_gene_id	baseMean	log2FoldChange	lfcSE	stat	pvalue	padj	hgnc_symbol	tissue1	tissue2
ensembl_gene_id	baseMean	log2FoldChange	lfcSE	stat	pvalue	padj	hgnc_symbol	tissue1	tissue2
ensembl_gene_id	baseMean	log2FoldChange	lfcSE	stat	pvalue	padj	hgnc_symbol	tissue1	tissue2
ensembl_gene_id	baseMean	log2FoldChange	lfcSE	stat	pvalue	padj	hgnc_symbol	tissue1	tissue2
ensembl_gene_id	baseMean	log2FoldChange	lfcSE	stat	pvalue	padj	hgnc_symbol	tissue1	tissue2
ensembl_gene_id	baseMean	log2FoldChange	lfcSE	stat	pvalue	padj	hgnc_symbol	tissue1	tissue2
ensembl_gene_id	baseMean	log2FoldChange	lfcSE	stat	pvalue	padj	hgnc_symbol	tissue1	tissue2
ensembl_gene_id	baseMean	log2FoldChange	lfcSE	stat	pvalue	padj	hgnc_symbol	tissue1	tissue2
ensembl_gene_id	baseMean	log2FoldChange	lfcSE	stat	pvalue	padj	hgnc_symbol	tissue1	tissue2
ensembl_gene_id	baseMean	log2FoldChange	lfcSE	stat	pvalue	padj	hgnc_symbol	tissue1	tissue2
ensembl_gene_id	baseMean	log2FoldChange	lfcSE	stat	pvalue	padj	hgnc_symbol	tissue1	tissue2
ensembl_gene_id	baseMean	log2FoldChange	lfcSE	stat	pvalue	padj	hgnc_symbol	tissue1	tissue2
ensembl_gene_id	baseMean	log2FoldChange	lfcSE	stat	pvalue	padj	hgnc_symbol	tissue1	tissue2
ensembl_gene_id	baseMean	log2FoldChange	lfcSE	stat	pvalue	padj	hgnc_symbol	tissue1	tissue2
ensembl_gene_id	baseMean	log2FoldChange	lfcSE	stat	pvalue	padj	hgnc_symbol	tissue1	tissue2
ensembl_gene_id	baseMean	log2FoldChange	lfcSE	stat	pvalue	padj	hgnc_symbol	tissue1	tissue2
ensembl_gene_id	baseMean	log2FoldChange	lfcSE	stat	pvalue	padj	hgnc_symbol	tissue1	tissue2
ensembl_gene_id	baseMean	log2FoldChange	lfcSE	stat	pvalue	padj	hgnc_symbol	tissue1	tissue2
ensembl_gene_id	baseMean	log2FoldChange	lfcSE	stat	pvalue	padj	hgnc_symbol	tissue1	tissue2
ensembl_gene_id	baseMean	log2FoldChange	lfcSE	stat	pvalue	padj	hgnc_symbol	tissue1	tissue2
ensembl_gene_id	baseMean	log2FoldChange	lfcSE	stat	pvalue	padj	hgnc_symbol	tissue1	tissue2
ensembl_gene_id	baseMean	log2FoldChange	lfcSE	stat	pvalue	padj	hgnc_symbol	tissue1	tissue2
ensembl_gene_id	baseMean	log2FoldChange	lfcSE	stat	pvalue	padj	hgnc_symbol	tissue1	tissue2
ensembl_gene_id	baseMean	log2FoldChange	lfcSE	stat	pvalue	padj	hgnc_symbol	tissue1	tissue2
ensembl_gene_id	baseMean	log2FoldChange	lfcSE	stat	pvalue	padj	hgnc_symbol	tissue1	tissue2
ensembl_gene_id	baseMean	log2FoldChange	lfcSE	stat	pvalue	padj	hgnc_symbol	tissue1	tissue2
ensembl_gene_id	baseMean	log2FoldChange	lfcSE	stat	pvalue	padj	hgnc_symbol	tissue1	tissue2
ensembl_gene_id	baseMean	log2FoldChange	lfcSE	stat	pvalue	padj	hgnc_symbol	tissue1	tissue2
ensembl_gene_id	baseMean	log2FoldChange	lfcSE	stat	pvalue	padj	hgnc_symbol	tissue1	tissue2
ensembl_gene_id	baseMean	log2FoldChange	lfcSE	stat	pvalue	padj	hgnc_symbol	tissue1	tissue2
ensembl_gene_id	baseMean	log2FoldChange	lfcSE	stat	pvalue	padj	hgnc_symbol	tissue1	tissue2
ensembl_gene_id	baseMean	log2FoldChange	lfcSE	stat	pvalue	padj	hgnc_symbol	tissue1	tissue2
ensembl_gene_id	baseMean	log2FoldChange	lfcSE	stat	pvalue	padj	hgnc_symbol	tissue1	tissue2
ensembl_gene_id	baseMean	log2FoldChange	lfcSE	stat	pvalue	padj	hgnc_symbol	tissue1	tissue2
ensembl_gene_id	baseMean	log2FoldChange	lfcSE	stat	pvalue	padj	hgnc_symbol	tissue1	tissue2
ensembl_gene_id	baseMean	log2FoldChange	lfcSE	stat	pvalue	padj	hgnc_symbol	tissue1	tissue2
ensembl_gene_id	baseMean	log2FoldChange	lfcSE	stat	pvalue	padj	hgnc_symbol	tissue1	tissue2
ensembl_gene_id	baseMean	log2FoldChange	lfcSE	stat	pvalue	padj	hgnc_symbol	tissue1	tissue2
ensembl_gene_id	baseMean	log2FoldChange	lfcSE	stat	pvalue	padj	hgnc_symbol	tissue1	tissue2
ensembl_gene_id	baseMean	log2FoldChange	lfcSE	stat	pvalue	padj	hgnc_symbol	tissue1	tissue2
ensembl_gene_id	baseMean	log2FoldChange	lfcSE	stat	pvalue	padj	hgnc_symbol	tissue1	tissue2
ensembl_gene_id	baseMean	log2FoldChange	lfcSE	stat	pvalue	padj	hgnc_symbol	tissue1	tissue2
ensembl_gene_id	baseMean	log2FoldChange	lfcSE	stat	pvalue	padj	hgnc_symbol	tissue1	tissue2
ensembl_gene_id	baseMean	log2FoldChange	lfcSE	stat	pvalue	padj	hgnc_symbol	tissue1	tissue2
ensembl_gene_id	baseMean	log2FoldChange	lfcSE	stat	pvalue	padj	hgnc_symbol	tissue1	tissue2
ensembl_gene_id	baseMean	log2FoldChange	lfcSE	stat	pvalue	padj	hgnc_symbol	tissue1	tissue2
ensembl_gene_id	baseMean	log2FoldChange	lfcSE	stat	pvalue	padj	hgnc_symbol	tissue1	tissue2
ensembl_gene_id	baseMean	log2FoldChange	lfcSE	stat	pvalue	padj	hgnc_symbol	tissue1	tissue2
ensembl_gene_id	baseMean	log2FoldChange	lfcSE	stat	pvalue	padj	hgnc_symbol	tissue1	tissue2
ensembl_gene_id	baseMean	log2FoldChange	lfcSE	stat	pvalue	padj	hgnc_symbol	tissue1	tissue2
ensembl_gene_id	baseMean	log2FoldChange	lfcSE	stat	pvalue	padj	hgnc_symbol	tissue1	tissue2
ensembl_gene_id	baseMean	log2FoldChange	lfcSE	stat	pvalue	padj	hgnc_symbol	tissue1	tissue2
ensembl_gene_id	baseMean	log2FoldChange	lfcSE	stat	pvalue	padj	hgnc_symbol	tissue1	tissue2
ensembl_gene_id	baseMean	log2FoldChange	lfcSE	stat	pvalue	padj	hgnc_symbol	tissue1	tissue2
ensembl_gene_id	baseMean	log2FoldChange	lfcSE	stat	pvalue	padj	hgnc_symbol	tissue1	tissue2
ensembl_gene_id	baseMean	log2FoldChange	lfcSE	stat	pvalue	padj	hgnc_symbol	tissue1	tissue2
ensembl_gene_id	baseMean	log2FoldChange	lfcSE	stat	pvalue	padj	hgnc_symbol	tissue1	tissue2
ensembl_gene_id	baseMean	log2FoldChange	lfcSE	stat	pvalue	padj	hgnc_symbol	tissue1	tissue2
ensembl_gene_id	baseMean	log2FoldChange	lfcSE	stat	pvalue	padj	hgnc_symbol	tissue1	tissue2
ensembl_gene_id	baseMean	log2FoldChange	lfcSE	stat	pvalue	padj	hgnc_symbol	tissue1	tissue2
ensembl_gene_id	baseMean	log2FoldChange	lfcSE	stat	pvalue	padj	hgnc_symbol	tissue1	tissue2
ensembl_gene_id	baseMean	log2FoldChange	lfcSE	stat	pvalue	padj	hgnc_symbol	tissue1	tissue2
ensembl_gene_id	baseMean	log2FoldChange	lfcSE	stat	pvalue	padj	hgnc_symbol	tissue1	tissue2
ensembl_gene_id	baseMean	log2FoldChange	lfcSE	stat	pvalue	padj	hgnc_symbol	tissue1	tissue2
ensembl_gene_id	baseMean	log2FoldChange	lfcSE	stat	pvalue	padj	hgnc_symbol	tissue1	tissue2
ensembl_gene_id	baseMean	log2FoldChange	lfcSE	stat	pvalue	padj	hgnc_symbol	tissue1	tissue2
ensembl_gene_id	baseMean	log2FoldChange	lfcSE	stat	pvalue	padj	hgnc_symbol	tissue1	tissue2
ensembl_gene_id	baseMean	log2FoldChange	lfcSE	stat	pvalue	padj	hgnc_symbol	tissue1	tissue2
ensembl_gene_id	baseMean	log2FoldChange	lfcSE	stat	pvalue	padj	hgnc_symbol	tissue1	tissue2
ensembl_gene_id	baseMean	log2FoldChange	lfcSE	stat	pvalue	padj	hgnc_symbol	tissue1	tissue2
ensembl_gene_id	baseMean	log2FoldChange	lfcSE	stat	pvalue	padj	hgnc_symbol	tissue1	tissue2
ensembl_gene_id	baseMean	log2FoldChange	lfcSE	stat	pvalue	padj	hgnc_symbol	tissue1	tissue2
ensembl_gene_id	baseMean	log2FoldChange	lfcSE	stat	pvalue	padj	hgnc_symbol	tissue1	tissue2
ensembl_gene_id	baseMean	log2FoldChange	lfcSE	stat	pvalue	padj	hgnc_symbol	tissue1	tissue2
ensembl_gene_id	baseMean	log2FoldChange	lfcSE	stat	pvalue	padj	hgnc_symbol	tissue1	tissue2
ensembl_gene_id	baseMean	log2FoldChange	lfcSE	stat	pvalue	padj	hgnc_symbol	tissue1	tissue2
ensembl_gene_id	baseMean	log2FoldChange	lfcSE	stat	pvalue	padj	hgnc_symbol	tissue1	tissue2
ensembl_gene_id	baseMean	log2FoldChange	lfcSE	stat	pvalue	padj	hgnc_symbol	tissue1	tissue2
ensembl_gene_id	baseMean	log2FoldChange	lfcSE	stat	pvalue	padj	hgnc_symbol	tissue1	tissue2
ensembl_gene_id	baseMean	log2FoldChange	lfcSE	stat	pvalue	padj	hgnc_symbol	tissue1	tissue2
ensembl_gene_id	baseMean	log2FoldChange	lfcSE	stat	pvalue	padj	hgnc_symbol	tissue1	tissue2
ensembl_gene_id	baseMean	log2FoldChange	lfcSE	stat	pvalue	padj	hgnc_symbol	tissue1	tissue2
ensembl_gene_id	baseMean	log2FoldChange	lfcSE	stat	pvalue	padj	hgnc_symbol	tissue1	tissue2
ensembl_gene_id	baseMean	log2FoldChange	lfcSE	stat	pvalue	padj	hgnc_symbol	tissue1	tissue2
ensembl_gene_id	baseMean	log2FoldChange	lfcSE	stat	pvalue	padj	hgnc_symbol	tissue1	tissue2
ensembl_gene_id	baseMean	log2FoldChange	lfcSE	stat	pvalue	padj	hgnc_symbol	tissue1	tissue2
ensembl_gene_id	baseMean	log2FoldChange	lfcSE	stat	pvalue	padj	hgnc_symbol	tissue1	tissue2
ensembl_gene_id	baseMean	log2FoldChange	lfcSE	stat	pvalue	padj	hgnc_symbol	tissue1	tissue2
ensembl_gene_id	baseMean	log2FoldChange	lfcSE	stat	pvalue	padj	hgnc_symbol	tissue1	tissue2
ensembl_gene_id	baseMean	log2FoldChange	lfcSE	stat	pvalue	padj	hgnc_symbol	tissue1	tissue2
ensembl_gene_id	baseMean	log2FoldChange	lfcSE	stat	pvalue	padj	hgnc_symbol	tissue1	tissue2
ensembl_gene_id	baseMean	log2FoldChange	lfcSE	stat	pvalue	padj	hgnc_symbol	tissue1	tissue2
ensembl_gene_id	baseMean	log2FoldChange	lfcSE	stat	pvalue	padj	hgnc_symbol	tissue1	tissue2
ensembl_gene_id	baseMean	log2FoldChange	lfcSE	stat	pvalue	padj	hgnc_symbol	tissue1	tissue2
ensembl_gene_id	baseMean	log2FoldChange	lfcSE	stat	pvalue	padj	hgnc_symbol	tissue1	tissue2
ensembl_gene_id	baseMean	log2FoldChange	lfcSE	stat	pvalue	padj	hgnc_symbol	tissue1	tissue2
ensembl_gene_id	baseMean	log2FoldChange	lfcSE	stat	pvalue	padj	hgnc_symbol	tissue1	tissue2
ensembl_gene_id	baseMean	log2FoldChange	lfcSE	stat	pvalue	padj	hgnc_symbol	tissue1	tissue2
ensembl_gene_id	baseMean	log2FoldChange	lfcSE	stat	pvalue	padj	hgnc_symbol	tissue1	tissue2
ensembl_gene_id	baseMean	log2FoldChange	lfcSE	stat	pvalue	padj	hgnc_symbol	tissue1	tissue2
ensembl_gene_id	baseMean	log2FoldChange	lfcSE	stat	pvalue	padj	hgnc_symbol	tissue1	tissue2
ensembl_gene_id	baseMean	log2FoldChange	lfcSE	stat	pvalue	padj	hgnc_symbol	tissue1	tissue2
ensembl_gene_id	baseMean	log2FoldChange	lfcSE	stat	pvalue	padj	hgnc_symbol	tissue1	tissue2
ensembl_gene_id	baseMean	log2FoldChange	lfcSE	stat	pvalue	padj	hgnc_symbol	tissue1	tissue2
ensembl_gene_id	baseMean	log2FoldChange	lfcSE	stat	pvalue	padj	hgnc_symbol	tissue1	tissue2
ensembl_gene_id	baseMean	log2FoldChange	lfcSE	stat	pvalue	padj	hgnc_symbol	tissue1	tissue2
ensembl_gene_id	baseMean	log2FoldChange	lfcSE	stat	pvalue	padj	hgnc_symbol	tissue1	tissue2
ensembl_gene_id	baseMean	log2FoldChange	lfcSE	stat	pvalue	padj	hgnc_symbol	tissue1	tissue2
ensembl_gene_id	baseMean	log2FoldChange	lfcSE	stat	pvalue	padj	hgnc_symbol	tissue1	tissue2
ensembl_gene_id	baseMean	log2FoldChange	lfcSE	stat	pvalue	padj	hgnc_symbol	tissue1	tissue2
ensembl_gene_id	baseMean	log2FoldChange	lfcSE	stat	pvalue	padj	hgnc_symbol	tissue1	tissue2
ensembl_gene_id	baseMean	log2FoldChange	lfcSE	stat	pvalue	padj	hgnc_symbol	tissue1	tissue2
ensembl_gene_id	baseMean	log2FoldChange	lfcSE	stat	pvalue	padj	hgnc_symbol	tissue1	tissue2
ensembl_gene_id	baseMean	log2FoldChange	lfcSE	stat	pvalue	padj	hgnc_symbol	tissue1	tissue2
ensembl_gene_id	baseMean	log2FoldChange	lfcSE	stat	pvalue	padj	hgnc_symbol	tissue1	tissue2
ensembl_gene_id	baseMean	log2FoldChange	lfcSE	stat	pvalue	padj	hgnc_symbol	tissue1	tissue2
ensembl_gene_id	baseMean	log2FoldChange	lfcSE	stat	pvalue	padj	hgnc_symbol	tissue1	tissue2
ensembl_gene_id	baseMean	log2FoldChange	lfcSE	stat	pvalue	padj	hgnc_symbol	tissue1	tissue2
ensembl_gene_id	baseMean	log2FoldChange	lfcSE	stat	pvalue	padj	hgnc_symbol	tissue1	tissue2
ensembl_gene_id	baseMean	log2FoldChange	lfcSE	stat	pvalue	padj	hgnc_symbol	tissue1	tissue2
ensembl_gene_id	baseMean	log2FoldChange	lfcSE	stat	pvalue	padj	hgnc_symbol	tissue1	tissue2
ensembl_gene_id	baseMean	log2FoldChange	lfcSE	stat	pvalue	padj	hgnc_symbol	tissue1	tissue2
ensembl_gene_id	baseMean	log2FoldChange	lfcSE	stat	pvalue	padj	hgnc_symbol	tissue1	tissue2
ensembl_gene_id	baseMean	log2FoldChange	lfcSE	stat	pvalue	padj	hgnc_symbol	tissue1	tissue2
ensembl_gene_id	baseMean	log2FoldChange	lfcSE	stat	pvalue	padj	hgnc_symbol	tissue1	tissue2
ensembl_gene_id	baseMean	log2FoldChange	lfcSE	stat	pvalue	padj	hgnc_symbol	tissue1	tissue2
ensembl_gene_id	baseMean	log2FoldChange	lfcSE	stat	pvalue	padj	hgnc_symbol	tissue1	tissue2
ensembl_gene_id	baseMean	log2FoldChange	lfcSE	stat	pvalue	padj	hgnc_symbol	tissue1	tissue2
ensembl_gene_id	baseMean	log2FoldChange	lfcSE	stat	pvalue	padj	hgnc_symbol	tissue1	tissue2
ensembl_gene_id	baseMean	log2FoldChange	lfcSE	stat	pvalue	padj	hgnc_symbol	tissue1	tissue2
ensembl_gene_id	baseMean	log2FoldChange	lfcSE	stat	pvalue	padj	hgnc_symbol	tissue1	tissue2
ensembl_gene_id	baseMean	log2FoldChange	lfcSE	stat	pvalue	padj	hgnc_symbol	tissue1	tissue2
ensembl_gene_id	baseMean	log2FoldChange	lfcSE	stat	pvalue	padj	hgnc_symbol	tissue1	tissue2
ensembl_gene_id	baseMean	log2FoldChange	lfcSE	stat	pvalue	padj	hgnc_symbol	tissue1	tissue2
ensembl_gene_id	baseMean	log2FoldChange	lfcSE	stat	pvalue	padj	hgnc_symbol	tissue1	tissue2
ensembl_gene_id	baseMean	log2FoldChange	lfcSE	stat	pvalue	padj	hgnc_symbol	tissue1	tissue2
ensembl_gene_id	baseMean	log2FoldChange	lfcSE	stat	pvalue	padj	hgnc_symbol	tissue1	tissue2
ensembl_gene_id	baseMean	log2FoldChange	lfcSE	stat	pvalue	padj	hgnc_symbol	tissue1	tissue2
ensembl_gene_id	baseMean	log2FoldChange	lfcSE	stat	pvalue	padj	hgnc_symbol	tissue1	tissue2
ensembl_gene_id	baseMean	log2FoldChange	lfcSE	stat	pvalue	padj	hgnc_symbol	tissue1	tissue2
ensembl_gene_id	baseMean	log2FoldChange	lfcSE	stat	pvalue	padj	hgnc_symbol	tissue1	tissue2
ensembl_gene_id	baseMean	log2FoldChange	lfcSE	stat	pvalue	padj	hgnc_symbol	tissue1	tissue2
ensembl_gene_id	baseMean	log2FoldChange	lfcSE	stat	pvalue	padj	hgnc_symbol	tissue1	tissue2
ensembl_gene_id	baseMean	log2FoldChange	lfcSE	stat	pvalue	padj	hgnc_symbol	tissue1	tissue2
ensembl_gene_id	baseMean	log2FoldChange	lfcSE	stat	pvalue	padj	hgnc_symbol	tissue1	tissue2
ensembl_gene_id	baseMean	log2FoldChange	lfcSE	stat	pvalue	padj	hgnc_symbol	tissue1	tissue2
ensembl_gene_id	baseMean	log2FoldChange	lfcSE	stat	pvalue	padj	hgnc_symbol	tissue1	tissue2
ensembl_gene_id	baseMean	log2FoldChange	lfcSE	stat	pvalue	padj	hgnc_symbol	tissue1	tissue2
ensembl_gene_id	baseMean	log2FoldChange	lfcSE	stat	pvalue	padj	hgnc_symbol	tissue1	tissue2
ensembl_gene_id	baseMean	log2FoldChange	lfcSE	stat	pvalue	padj	hgnc_symbol	tissue1	tissue2
ensembl_gene_id	baseMean	log2FoldChange	lfcSE	stat	pvalue	padj	hgnc_symbol	tissue1	tissue2
ensembl_gene_id	baseMean	log2FoldChange	lfcSE	stat	pvalue	padj	hgnc_symbol	tissue1	tissue2
ensembl_gene_id	baseMean	log2FoldChange	lfcSE	stat	pvalue	padj	hgnc_symbol	tissue1	tissue2
ensembl_gene_id	baseMean	log2FoldChange	lfcSE	stat	pvalue	padj	hgnc_symbol	tissue1	tissue2
ensembl_gene_id	baseMean	log2FoldChange	lfcSE	stat	pvalue	padj	hgnc_symbol	tissue1	tissue2
ensembl_gene_id	baseMean	log2FoldChange	lfcSE	stat	pvalue	padj	hgnc_symbol	tissue1	tissue2
ensembl_gene_id	baseMean	log2FoldChange	lfcSE	stat	pvalue	padj	hgnc_symbol	tissue1	tissue2
ensembl_gene_id	baseMean	log2FoldChange	lfcSE	stat	pvalue	padj	hgnc_symbol	tissue1	tissue2
ensembl_gene_id	baseMean	log2FoldChange	lfcSE	stat	pvalue	padj	hgnc_symbol	tissue1	tissue2
ensembl_gene_id	baseMean	log2FoldChange	lfcSE	stat	pvalue	padj	hgnc_symbol	tissue1	tissue2
ensembl_gene_id	baseMean	log2FoldChange	lfcSE	stat	pvalue	padj	hgnc_symbol	tissue1	tissue2
ensembl_gene_id	baseMean	log2FoldChange	lfcSE	stat	pvalue	padj	hgnc_symbol	tissue1	tissue2
ensembl_gene_id	baseMean	log2FoldChange	lfcSE	stat	pvalue	padj	hgnc_symbol	tissue1	tissue2
ensembl_gene_id	baseMean	log2FoldChange	lfcSE	stat	pvalue	padj	hgnc_symbol	tissue1	tissue2
ensembl_gene_id	baseMean	log2FoldChange	lfcSE	stat	pvalue	padj	hgnc_symbol	tissue1	tissue2
ensembl_gene_id	baseMean	log2FoldChange	lfcSE	stat	pvalue	padj	hgnc_symbol	tissue1	tissue2
ensembl_gene_id	baseMean	log2FoldChange	lfcSE	stat	pvalue	padj	hgnc_symbol	tissue1	tissue2
ensembl_gene_id	baseMean	log2FoldChange	lfcSE	stat	pvalue	padj	hgnc_symbol	tissue1	tissue2
ensembl_gene_id	baseMean	log2FoldChange	lfcSE	stat	pvalue	padj	hgnc_symbol	tissue1	tissue2
ensembl_gene_id	baseMean	log2FoldChange	lfcSE	stat	pvalue	padj	hgnc_symbol	tissue1	tissue2
ensembl_gene_id	baseMean	log2FoldChange	lfcSE	stat	pvalue	padj	hgnc_symbol	tissue1	tissue2
ensembl_gene_id	baseMean	log2FoldChange	lfcSE	stat	pvalue	padj	hgnc_symbol	tissue1	tissue2
ensembl_gene_id	baseMean	log2FoldChange	lfcSE	stat	pvalue	padj	hgnc_symbol	tissue1	tissue2
ensembl_gene_id	baseMean	log2FoldChange	lfcSE	stat	pvalue	padj	hgnc_symbol	tissue1	tissue2
ensembl_gene_id	baseMean	log2FoldChange	lfcSE	stat	pvalue	padj	hgnc_symbol	tissue1	tissue2
ensembl_gene_id	baseMean	log2FoldChange	lfcSE	stat	pvalue	padj	hgnc_symbol	tissue1	tissue2
ensembl_gene_id	baseMean	log2FoldChange	lfcSE	stat	pvalue	padj	hgnc_symbol	tissue1	tissue2
ensembl_gene_id	baseMean	log2FoldChange	lfcSE	stat	pvalue	padj	hgnc_symbol	tissue1	tissue2
ensembl_gene_id	baseMean	log2FoldChange	lfcSE	stat	pvalue	padj	hgnc_symbol	tissue1	tissue2
ensembl_gene_id	baseMean	log2FoldChange	lfcSE	stat	pvalue	padj	hgnc_symbol	tissue1	tissue2
ensembl_gene_id	baseMean	log2FoldChange	lfcSE	stat	pvalue	padj	hgnc_symbol	tissue1	tissue2
ensembl_gene_id	baseMean	log2FoldChange	lfcSE	stat	pvalue	padj	hgnc_symbol	tissue1	tissue2
ensembl_gene_id	baseMean	log2FoldChange	lfcSE	stat	pvalue	padj	hgnc_symbol	tissue1	tissue2
ensembl_gene_id	baseMean	log2FoldChange	lfcSE	stat	pvalue	padj	hgnc_symbol	tissue1	tissue2
ensembl_gene_id	baseMean	log2FoldChange	lfcSE	stat	pvalue	padj	hgnc_symbol	tissue1	tissue2
ensembl_gene_id	baseMean	log2FoldChange	lfcSE	stat	pvalue	padj	hgnc_symbol	tissue1	tissue2
ensembl_gene_id	baseMean	log2FoldChange	lfcSE	stat	pvalue	padj	hgnc_symbol	tissue1	tissue2
ensembl_gene_id	baseMean	log2FoldChange	lfcSE	stat	pvalue	padj	hgnc_symbol	tissue1	tissue2
ensembl_gene_id	baseMean	log2FoldChange	lfcSE	stat	pvalue	padj	hgnc_symbol	tissue1	tissue2
ensembl_gene_id	baseMean	log2FoldChange	lfcSE	stat	pvalue	padj	hgnc_symbol	tissue1	tissue2
ensembl_gene_id	baseMean	log2FoldChange	lfcSE	stat	pvalue	padj	hgnc_symbol	tissue1	tissue2
ensembl_gene_id	baseMean	log2FoldChange	lfcSE	stat	pvalue	padj	hgnc_symbol	tissue1	tissue2
ensembl_gene_id	baseMean	log2FoldChange	lfcSE	stat	pvalue	padj	hgnc_symbol	tissue1	tissue2
ensembl_gene_id	baseMean	log2FoldChange	lfcSE	stat	pvalue	padj	hgnc_symbol	tissue1	tissue2
ensembl_gene_id	baseMean	log2FoldChange	lfcSE	stat	pvalue	padj	hgnc_symbol	tissue1	tissue2
ensembl_gene_id	baseMean	log2FoldChange	lfcSE	stat	pvalue	padj	hgnc_symbol	tissue1	tissue2
ensembl_gene_id	baseMean	log2FoldChange	lfcSE	stat	pvalue	padj	hgnc_symbol	tissue1	tissue2
ensembl_gene_id	baseMean	log2FoldChange	lfcSE	stat	pvalue	padj	hgnc_symbol	tissue1	tissue2
ensembl_gene_id	baseMean	log2FoldChange	lfcSE	stat	pvalue	padj	hgnc_symbol	tissue1	tissue2
ensembl_gene_id	baseMean	log2FoldChange	lfcSE	stat	pvalue	padj	hgnc_symbol	tissue1	tissue2
ensembl_gene_id	baseMean	log2FoldChange	lfcSE	stat	pvalue	padj	hgnc_symbol	tissue1	tissue2
ensembl_gene_id	baseMean	log2FoldChange	lfcSE	stat	pvalue	padj	hgnc_symbol	tissue1	tissue2
ensembl_gene_id	baseMean	log2FoldChange	lfcSE	stat	pvalue	padj	hgnc_symbol	tissue1	tissue2
[truncated: 5,298 more rows]

## Sheet: WGCNA Modules (Early)
ensembl_gene_id	hgnc_symbol	cluster
ENSG00000006015	REX1BD	0
ENSG00000016391	CHDH	0
ENSG00000046653	GPM6B	0
ENSG00000065621	GSTO2	0
ENSG00000069011	PITX1	0
ENSG00000070778	PTPN21	0
ENSG00000071246	VASH1	0
ENSG00000079819	EPB41L2	0
ENSG00000083097	DOP1A	0
ENSG00000084710	EFR3B	0
ENSG00000087074	PPP1R15A	0
ENSG00000089225	TBX5	0
ENSG00000089486	CDIP1	0
ENSG00000100883	SRP54	0
ENSG00000108515	ENO3	0
ENSG00000108848	LUC7L3	0
ENSG00000113389	NPR3	0
ENSG00000116690	PRG4	0
ENSG00000119729	RHOQ	0
ENSG00000120693	SMAD9	0
ENSG00000121075	TBX4	0
ENSG00000125868	DSTN	0
ENSG00000126778	SIX1	0
ENSG00000127578	WFIKKN1	0
ENSG00000128709	HOXD9	0
ENSG00000128710	HOXD10	0
ENSG00000128713	HOXD11	0
ENSG00000132570	PCBD2	0
ENSG00000132581	SDF2	0
ENSG00000135679	MDM2	0
ENSG00000137094	DNAJB5	0
ENSG00000139083	ETV6	0
ENSG00000139351	SYCP3	0
ENSG00000145808	ADAMTS19	0
ENSG00000147364	FBXO25	0
ENSG00000148795	CYP17A1	0
ENSG00000148935	GAS2	0
ENSG00000150455	TIRAP	0
ENSG00000152464	RPP38	0
ENSG00000155252	PI4K2A	0
ENSG00000157890	MEGF11	0
ENSG00000162931	TRIM17	0
ENSG00000164307	ERAP1	0
ENSG00000164707	SLC13A4	0
ENSG00000169246	NPIPB3	0
ENSG00000169756	LIMS1	0
ENSG00000171314	PGAM1	0
ENSG00000172476	RAB40A	0
ENSG00000173933	RBM4	0
ENSG00000174579	MSL2	0
ENSG00000175309	PHYKPL	0
ENSG00000176142	TMEM39A	0
ENSG00000176401	EID2B	0
ENSG00000177202	SPACA4	0
ENSG00000177943	MAMDC4	0
ENSG00000179195	ZNF664	0
ENSG00000186628	FSD2	0
ENSG00000187815	ZFP69	0
ENSG00000188389	PDCD1	0
ENSG00000188693	CYP51A1-AS1	0
ENSG00000188735	TMEM120B	0
ENSG00000196878	LAMB3	0
ENSG00000197536	CARINH	0
ENSG00000204344	STK19	0
ENSG00000206013	IFITM5	0
ENSG00000206172	HBA1	0
ENSG00000214820	MPRIPP1	0
ENSG00000224066		0
ENSG00000224431		0
ENSG00000224881		0
ENSG00000225032		0
ENSG00000226015	CCT8P1	0
ENSG00000226390	KCNQ2-AS1	0
ENSG00000228804		0
ENSG00000230806	SRGAP2-AS1	0
ENSG00000231340	ACTG1P10	0
ENSG00000232671	ZNF687-AS1	0
ENSG00000233122	CTAGE7P	0
ENSG00000236478		0
ENSG00000237070		0
ENSG00000237380	HOXD-AS2	0
ENSG00000239503	MARK2P8	0
ENSG00000239524	RPL32P34	0
ENSG00000244513	EOGT-DT	0
ENSG00000244515	KRT18P34	0
ENSG00000245711	NADK2-AS1	0
ENSG00000247993	FOXD1-AS1	0
ENSG00000250133	HOXC-AS2	0
ENSG00000253144		0
ENSG00000253438	PCAT1	0
ENSG00000254995	STX16-NPEPL1	0
ENSG00000255566		0
ENSG00000257410		0
ENSG00000257621	PSMA3-AS1	0
ENSG00000258114		0
ENSG00000258685	AKR1B1P5	0
ENSG00000258952	SALRNA1	0
ENSG00000262966		0
ENSG00000263956	NBPF11	0
ENSG00000267137		0
ENSG00000270820	USP34-DT	0
ENSG00000271843		0
ENSG00000272078		0
ENSG00000272235		0
ENSG00000272505		0
ENSG00000274553	CICP15	0
ENSG00000276578		0
ENSG00000276692	NA	0
ENSG00000279057		0
ENSG00000279278		0
ENSG00000280183		0
ENSG00000282458	WASH5P	0
ENSG00000284830		0
ENSG00000285283		0
ENSG00000005073	HOXA11	1
ENSG00000005882	PDK2	1
ENSG00000006118	TMEM132A	1
ENSG00000006283	CACNA1G	1
ENSG00000007341	ST7L	1
ENSG00000008196	TFAP2B	1
ENSG00000013374	NUB1	1
ENSG00000026508	CD44	1
ENSG00000029559	IBSP	1
ENSG00000034510	TMSB10	1
ENSG00000048052	HDAC9	1
ENSG00000065618	COL17A1	1
ENSG00000070193	FGF10	1
ENSG00000071054	MAP4K4	1
ENSG00000080644	CHRNA3	1
ENSG00000086619	ERO1B	1
ENSG00000099219	ERMP1	1
ENSG00000100097	LGALS1	1
ENSG00000101347	SAMHD1	1
ENSG00000102466	FGF14	1
ENSG00000106069	CHN2	1
ENSG00000106689	LHX2	1
ENSG00000107731	UNC5B	1
ENSG00000108821	COL1A1	1
ENSG00000110076	NRXN2	1
ENSG00000110844	PRPF40B	1
ENSG00000110987	BCL7A	1
ENSG00000111799	COL12A1	1
ENSG00000112208	BAG2	1
ENSG00000113504	SLC12A7	1
ENSG00000113558	SKP1	1
ENSG00000114251	WNT5A	1
ENSG00000115286	NDUFS7	1
ENSG00000115902	SLC1A4	1
ENSG00000116132	PRRX1	1
ENSG00000119042	SATB2	1
ENSG00000121039	RDH10	1
ENSG00000122691	TWIST1	1
ENSG00000125246	CLYBL	1
ENSG00000126803	HSPA2	1
ENSG00000128422	KRT17	1
ENSG00000134504	KCTD1	1
ENSG00000134779	TPGS2	1
ENSG00000137203	TFAP2A	1
ENSG00000138771	SHROOM3	1
ENSG00000138944	SHISAL1	1
ENSG00000140937	CDH11	1
ENSG00000141376	BCAS3	1
ENSG00000143355	LHX9	1
ENSG00000143494	VASH2	1
ENSG00000145506	NKD2	1
ENSG00000145632	PLK2	1
ENSG00000145824	CXCL14	1
ENSG00000151498	ACAD8	1
ENSG00000152580	IGSF10	1
ENSG00000154856	APCDD1	1
ENSG00000154889	MPPE1	1
ENSG00000159023	EPB41	1
ENSG00000162997	PRORSD1P	1
ENSG00000163132	MSX1	1
ENSG00000164692	COL1A2	1
ENSG00000165443	PHYHIPL	1
ENSG00000166260	COX11	1
ENSG00000166664	CHRFAM7A	1
ENSG00000168843	FSTL5	1
ENSG00000170004	CHD3	1
ENSG00000170178	HOXD12	1
ENSG00000171861	MRM3	1
ENSG00000174586	ZNF497	1
ENSG00000175274	TP53I11	1
ENSG00000176788	BASP1	1
ENSG00000176887	SOX11	1
ENSG00000177337	DLGAP1-AS1	1
ENSG00000177889	UBE2N	1
ENSG00000178031	ADAMTSL1	1
ENSG00000182318	ZSCAN22	1
ENSG00000185551	NR2F2	1
ENSG00000186340	THBS2	1
ENSG00000188452	CERKL	1
ENSG00000188467	SLC24A5	1
ENSG00000203397	SHISA5P2	1
ENSG00000203993	ARRDC1-AS1	1
ENSG00000204977	TRIM13	1
ENSG00000205277	MUC12	1
ENSG00000214248		1
ENSG00000221866	PLXNA4	1
ENSG00000225953	SATB2-AS1	1
ENSG00000231609	EHBP1-AS1	1
ENSG00000234921		1
ENSG00000234982	RPL7AP47	1
ENSG00000235590	GNAS-AS1	1
ENSG00000236404	VLDLR-AS1	1
ENSG00000236671	PRKG1-AS1	1
ENSG00000240990	HOXA11-AS	1
ENSG00000242888		1
ENSG00000243766	HOTTIP	1
ENSG00000244586	WNT5A-AS1	1
ENSG00000249568		1
ENSG00000250328		1
ENSG00000250619		1
ENSG00000250902	SMAD1-AS1	1
ENSG00000253764	KBTBD11-AS1	1
ENSG00000254665		1
ENSG00000254902	ANO1-AS1	1
ENSG00000257761		1
ENSG00000258525		1
ENSG00000258634		1
ENSG00000259291	ZNF710-AS1	1
ENSG00000259768	ZFHX3-AS1	1
ENSG00000260577	CDH3-AS1	1
ENSG00000260834		1
ENSG00000261054	SYNM-AS2	1
ENSG00000261762		1
ENSG00000262712		1
ENSG00000263272		1
ENSG00000263424		1
ENSG00000263571		1
ENSG00000267198		1
ENSG00000267466		1
ENSG00000267601		1
ENSG00000268230		1
ENSG00000272899	SPMIP1	1
ENSG00000277443	MARCKS	1
ENSG00000277491		1
ENSG00000278592		1
ENSG00000279453		1
ENSG00000279571		1
ENSG00000280414		1
ENSG00000284770	TBCE	1
ENSG00000284966		1
ENSG00000285278		1
ENSG00000013810	TACC3	2
ENSG00000049089	COL9A2	2
ENSG00000059691	GATB	2
ENSG00000060718	COL11A1	2
ENSG00000068078	FGFR3	2
ENSG00000069188	SDK2	2
ENSG00000074695	LMAN1	2
ENSG00000075035	WSCD2	2
ENSG00000077274	CAPN6	2
ENSG00000081237	PTPRC	2
ENSG00000082196	C1QTNF3	2
ENSG00000083782	EPYC	2
ENSG00000084073	ZMPSTE24	2
ENSG00000087302	RTRAF	2
ENSG00000092607	TBX15	2
ENSG00000092758	COL9A3	2
ENSG00000099869	IGF2-AS	2
ENSG00000099904	ZDHHC8	2
ENSG00000100395	L3MBTL2	2
ENSG00000100815	TRIP11	2
ENSG00000101190	TCFL5	2
ENSG00000103489	XYLT1	2
ENSG00000105357	MYH14	2
ENSG00000105664	COMP	2
ENSG00000106484	MEST	2
ENSG00000107185	RGP1	2
ENSG00000112280	COL9A1	2
ENSG00000115380	EFEMP1	2
ENSG00000117242	PINK1-AS	2
ENSG00000118094	TREH	2
ENSG00000122432	SPATA1	2
ENSG00000122642	FKBP9	2
ENSG00000124134	KCNS1	2
ENSG00000130595	TNNT3	2
ENSG00000132031	MATN3	2
ENSG00000134107	BHLHE40	2
ENSG00000135124	P2RX4	2
ENSG00000135473	PAN2	2
ENSG00000136110	CNMD	2
ENSG00000137441	FGFBP2	2
ENSG00000139219	COL2A1	2
ENSG00000141485	SLC13A5	2
ENSG00000142453	CARM1	2
ENSG00000144161	ZC3H8	2
ENSG00000144810	COL8A1	2
ENSG00000145681	HAPLN1	2
ENSG00000152952	PLOD2	2
ENSG00000157322	CLEC18A	2
ENSG00000157766	ACAN	2
ENSG00000158623	COPG2	2
ENSG00000159173	TNNI1	2
ENSG00000160307	S100B	2
ENSG00000161671	EMC10	2
ENSG00000162510	MATN1	2
ENSG00000164713	BRI3	2
ENSG00000165416	SUGT1	2
ENSG00000165650	PDZD8	2
ENSG00000166793	YPEL4	2
ENSG00000167244	IGF2	2
ENSG00000173548	SNX33	2
ENSG00000173705	SUSD5	2
ENSG00000174177	CTU2	2
ENSG00000178409	BEND3	2
ENSG00000181541	MAB21L2	2
ENSG00000182600	SNORC	2
ENSG00000182934	SRPRA	2
ENSG00000183978	COA3	2
ENSG00000185559	DLK1	2
ENSG00000186056	MATN1-AS1	2
ENSG00000186564	FOXD2	2
ENSG00000187942	LDLRAD2	2
ENSG00000188763	FZD9	2
ENSG00000196696	PDXDC2P-NPIPB14P	2
ENSG00000196739	COL27A1	2
ENSG00000197893	NRAP	2
ENSG00000198589	LRBA	2
ENSG00000204248	COL11A2	2
ENSG00000204291	COL15A1	2
ENSG00000213222	TOMM40P4	2
ENSG00000225028		2
ENSG00000225151	GOLGA2P7	2
ENSG00000225614	ZNF469	2
ENSG00000226380	NA	2
ENSG00000231721	LINC-PINT	2
ENSG00000233110	SORBS2-AS1	2
ENSG00000236383	CCDC200	2
ENSG00000245651		2
ENSG00000254340		2
ENSG00000254369	HOXA-AS3	2
ENSG00000254656	RTL1	2
ENSG00000255399	TBX5-AS1	2
ENSG00000255508		2
ENSG00000255867	DENND5B-AS1	2
ENSG00000257671	KRT7-AS	2
ENSG00000259583	ALDH1A3-AS1	2
ENSG00000260892		2
ENSG00000261448		2
ENSG00000261604		2
ENSG00000263585	PYCR1-AS1	2
ENSG00000266718		2
ENSG00000267598		2
ENSG00000267815		2
ENSG00000269068		2
ENSG00000270823		2
ENSG00000271204		2
ENSG00000272694		2
ENSG00000278177		2
ENSG00000279660		2
ENSG00000280435		2
ENSG00000284708		2
ENSG00000285106	NA	2
ENSG00000285886		2

## Sheet: WGCNA Modules (Late)
ensembl_gene_id	hgnc_symbol	cluster
ENSG00000004838	ZMYND10	0
ENSG00000005187	ACSM3	0
ENSG00000069011	PITX1	0
ENSG00000082014	SMARCD3	0
ENSG00000089159	PXN	0
ENSG00000090487	SPG21	0
ENSG00000100033	PRODH	0
ENSG00000101236	RNF24	0
ENSG00000104375	STK3	0
ENSG00000104722	NEFM	0
ENSG00000107736	CDH23	0
ENSG00000110060	PUS3	0
ENSG00000110900	TSPAN11	0
ENSG00000111325	OGFOD2	0
ENSG00000113460	BRIX1	0
ENSG00000115107	STEAP3	0
ENSG00000116151	MORN1	0
ENSG00000118260	CREB1	0
ENSG00000119707	RBM25	0
ENSG00000120093	HOXB3	0
ENSG00000121075	TBX4	0
ENSG00000125434	SLC25A35	0
ENSG00000127533	F2RL3	0
ENSG00000127838	PNKD	0
ENSG00000128604	IRF5	0
ENSG00000128709	HOXD9	0
ENSG00000128710	HOXD10	0
ENSG00000128713	HOXD11	0
ENSG00000131409	LRRC4B	0
ENSG00000131626	PPFIA1	0
ENSG00000133740	E2F5	0
ENSG00000141086	CTRL	0
ENSG00000141431	ASXL3	0
ENSG00000142252	GEMIN7	0
ENSG00000143631	FLG	0
ENSG00000145217	SLC26A1	0
ENSG00000146205	ANO7	0
ENSG00000149929	HIRIP3	0
ENSG00000150776	NKAPD1	0
ENSG00000151131	NOPCHAP1	0
ENSG00000154736	ADAMTS5	0
ENSG00000163915	IGF2BP2-AS1	0
ENSG00000164107	HAND2	0
ENSG00000168612	ZSWIM1	0
ENSG00000174628	IQCK	0
ENSG00000175110	MRPS22	0
ENSG00000175309	PHYKPL	0
ENSG00000176020	AMIGO3	0
ENSG00000183426	NPIPA1	0
ENSG00000185633	NDUFA4L2	0
ENSG00000186564	FOXD2	0
ENSG00000188542	DUSP28	0
ENSG00000196368	NUDT11	0
ENSG00000196811	CHRNG	0
ENSG00000197114	ZGPAT	0
ENSG00000197363	ZNF517	0
ENSG00000197841	ZNF181	0
ENSG00000198712	MT-CO2	0
ENSG00000198727	MT-CYB	0
ENSG00000198763	MT-ND2	0
ENSG00000198840	MT-ND3	0
ENSG00000198888	MT-ND1	0
ENSG00000198899	MT-ATP6	0
ENSG00000198938	MT-CO3	0
ENSG00000204044	SLC12A5-AS1	0
ENSG00000204388	HSPA1B	0
ENSG00000204959	ARHGEF34P	0
ENSG00000205238	SPDYE2	0
ENSG00000205583	STAG3L1	0
ENSG00000212907	MT-ND4L	0
ENSG00000215790	SLC35E2A	0
ENSG00000225937	PCA3	0
ENSG00000226752	CUTALP	0
ENSG00000230513	THAP7-AS1	0
ENSG00000230806	SRGAP2-AS1	0
ENSG00000234684	SDCBP2-AS1	0
ENSG00000235370	DNM1P51	0
ENSG00000236841		0
ENSG00000237125	HAND2-AS1	0
ENSG00000237380	HOXD-AS2	0
ENSG00000238086	PPP1R26P1	0
ENSG00000239503	MARK2P8	0
ENSG00000240303	ACAD11	0
ENSG00000242539		0
ENSG00000243230		0
ENSG00000244056	RN7SL417P	0
ENSG00000244556	ODCP	0
ENSG00000248527	MTATP6P1	0
ENSG00000250133	HOXC-AS2	0
ENSG00000251151	HOXC-AS3	0
ENSG00000253837	LOXL2-AS1	0
ENSG00000255399	TBX5-AS1	0
ENSG00000256377	MRPS35-DT	0
ENSG00000258311		0
ENSG00000259295	CSPG4P12	0
ENSG00000262966		0
ENSG00000265666	RARA-AS1	0
ENSG00000267137		0
ENSG00000267459	NA	0
ENSG00000269890	NA	0
ENSG00000269984		0
ENSG00000271361	HTATSF1P2	0
ENSG00000271774		0
ENSG00000272163		0
ENSG00000272767	JMJD1C-AS1	0
ENSG00000273729	NA	0
ENSG00000274553	CICP15	0
ENSG00000276180	H4C9	0
ENSG00000278952		0
ENSG00000279232		0
ENSG00000279583		0
ENSG00000279716		0
ENSG00000280399		0
ENSG00000281344	HELLPAR	0
ENSG00000285329		0
ENSG00000285651		0
ENSG00000285979		0
ENSG00000004487	KDM1A	1
ENSG00000005059	MCUB	1
ENSG00000005073	HOXA11	1
ENSG00000005882	PDK2	1
ENSG00000006015	REX1BD	1
ENSG00000006283	CACNA1G	1
ENSG00000006530	AGK	1
ENSG00000007341	ST7L	1
ENSG00000019995	ZRANB1	1
ENSG00000028839	TBPL1	1
ENSG00000039123	MTREX	1
ENSG00000046653	GPM6B	1
ENSG00000047410	TPR	1
ENSG00000047662	FAM184B	1
ENSG00000048052	HDAC9	1
ENSG00000050344	NFE2L3	1
ENSG00000050767	COL23A1	1
ENSG00000059728	MXD1	1
ENSG00000065618	COL17A1	1
ENSG00000067369	TP53BP1	1
ENSG00000070182	SPTB	1
ENSG00000070193	FGF10	1
ENSG00000072736	NFATC3	1
ENSG00000073711	PPP2R3A	1
ENSG00000083099	LYRM2	1
ENSG00000088808	PPP1R13B	1
ENSG00000091164	TXNL1	1
ENSG00000096696	DSP	1
ENSG00000099377	HSD3B7	1
ENSG00000100023	PPIL2	1
ENSG00000100036	SLC35E4	1
ENSG00000102466	FGF14	1
ENSG00000102910	LONP2	1
ENSG00000106009	BRAT1	1
ENSG00000109339	MAPK10	1
ENSG00000110492	MDK	1
ENSG00000110721	CHKA	1
ENSG00000110844	PRPF40B	1
ENSG00000111266	DUSP16	1
ENSG00000112078	KCTD20	1
ENSG00000112137	PHACTR1	1
ENSG00000112208	BAG2	1
ENSG00000113083	LOX	1
ENSG00000113504	SLC12A7	1
ENSG00000114026	OGG1	1
ENSG00000114251	WNT5A	1
ENSG00000114270	COL7A1	1
ENSG00000114416	FXR1	1
ENSG00000115364	MRPL19	1
ENSG00000115459	ELMOD3	1
ENSG00000115548	KDM3A	1
ENSG00000116690	PRG4	1
ENSG00000117009	KMO	1
ENSG00000117859	OSBPL9	1
ENSG00000119042	SATB2	1
ENSG00000119185	ITGB1BP1	1
ENSG00000119285	HEATR1	1
ENSG00000119681	LTBP2	1
ENSG00000121957	GPSM2	1
ENSG00000122085	MTERF4	1
ENSG00000123342	MMP19	1
ENSG00000124151	NCOA3	1
ENSG00000124749	COL21A1	1
ENSG00000125037	EMC3	1
ENSG00000125246	CLYBL	1
ENSG00000127831	VIL1	1
ENSG00000128422	KRT17	1
ENSG00000128641	MYO1B	1
ENSG00000128849	CGNL1	1
ENSG00000131149	GSE1	1
ENSG00000131238	PPT1	1
ENSG00000131711	MAP1B	1
ENSG00000132793	LPIN3	1
ENSG00000132879	FBXO44	1
ENSG00000133703	KRAS	1
ENSG00000134504	KCTD1	1
ENSG00000134775	FHOD3	1
ENSG00000134779	TPGS2	1
ENSG00000135046	ANXA1	1
ENSG00000135454	B4GALNT1	1
ENSG00000135740	SLC9A5	1
ENSG00000136040	PLXNC1	1
ENSG00000136842	TMOD1	1
ENSG00000136891	TEX10	1
ENSG00000138185	ENTPD1	1
ENSG00000138771	SHROOM3	1
ENSG00000141376	BCAS3	1
ENSG00000142606	MMEL1	1
ENSG00000143341	HMCN1	1
ENSG00000143355	LHX9	1
ENSG00000143869	GDF7	1
ENSG00000144893	MED12L	1
ENSG00000145506	NKD2	1
ENSG00000145824	CXCL14	1
ENSG00000146555	SDK1	1
ENSG00000147419	CCDC25	1
ENSG00000148082	SHC3	1
ENSG00000148468	FAM171A1	1
ENSG00000148824	MTG1	1
ENSG00000150687	PRSS23	1
ENSG00000151498	ACAD8	1
ENSG00000151575	TEX9	1
ENSG00000151694	ADAM17	1
ENSG00000152580	IGSF10	1
ENSG00000153113	CAST	1
ENSG00000153404	PLEKHG4B	1
ENSG00000154025	SLC5A10	1
ENSG00000154305	MIA3	1
ENSG00000154856	APCDD1	1
ENSG00000154889	MPPE1	1
ENSG00000155011	DKK2	1
ENSG00000155657	TTN	1
ENSG00000157184	CPT2	1
ENSG00000158169	FANCC	1
ENSG00000160973	FOXH1	1
ENSG00000162383	SLC1A7	1
ENSG00000162520	SYNC	1
ENSG00000162521	RBBP4	1
ENSG00000162997	PRORSD1P	1
ENSG00000163132	MSX1	1
ENSG00000163291	PAQR3	1
ENSG00000163319	MRPS18C	1
ENSG00000163904	SENP2	1
ENSG00000164941	INTS8	1
ENSG00000165046	LETM2	1
ENSG00000165443	PHYHIPL	1
ENSG00000166105	GLB1L3	1
ENSG00000166260	COX11	1
ENSG00000166394	CYB5R2	1
ENSG00000166405	RIC3	1
ENSG00000166428	PLD4	1
ENSG00000166439	RNF169	1
ENSG00000166546	BEAN1	1
ENSG00000166664	CHRFAM7A	1
ENSG00000167378	IRGQ	1
ENSG00000167768	KRT1	1
ENSG00000168237	GLYCTK	1
ENSG00000168386	FILIP1L	1
ENSG00000169018	FEM1B	1
ENSG00000170242	USP47	1
ENSG00000170854	RIOX2	1
ENSG00000171659	GPR34	1
ENSG00000171861	MRM3	1
ENSG00000171953	ATPAF2	1
ENSG00000172965	MIR4435-2HG	1
ENSG00000173638	SLC19A1	1
ENSG00000174586	ZNF497	1
ENSG00000174804	FZD4	1
ENSG00000175147	TMEM51-AS1	1
ENSG00000175344	CHRNA7	1
ENSG00000176401	EID2B	1
ENSG00000176788	BASP1	1
ENSG00000177463	NR2C2	1
ENSG00000177889	UBE2N	1
ENSG00000178177	LCORL	1
ENSG00000178802	MPI	1
ENSG00000178852	EFCAB13	1
ENSG00000180139	ACTA2-AS1	1
ENSG00000180822	PSMG4	1
ENSG00000182318	ZSCAN22	1
ENSG00000182871	COL18A1	1
ENSG00000183091	NEB	1
ENSG00000183723	CMTM4	1
ENSG00000183840	GPR39	1
ENSG00000184258	NA	1
ENSG00000185551	NR2F2	1
ENSG00000185838	GNB1L	1
ENSG00000186081	KRT5	1
ENSG00000186395	KRT10	1
ENSG00000186532	SMYD4	1
ENSG00000186814	ZSCAN30	1
ENSG00000186847	KRT14	1
ENSG00000187699	C2orf88	1
ENSG00000187764	SEMA4D	1
ENSG00000188452	CERKL	1
ENSG00000188467	SLC24A5	1
ENSG00000189337	KAZN	1
ENSG00000196199	MPHOSPH8	1
ENSG00000196459	TRAPPC2	1
ENSG00000196565	HBG2	1
ENSG00000196876	SCN8A	1
ENSG00000197530	MIB2	1
ENSG00000197653	DNAH10	1
ENSG00000198324	PHETA1	1
ENSG00000198604	BAZ1A	1
ENSG00000198791	CNOT7	1
ENSG00000198857	HSD3BP5	1
ENSG00000198865	CCDC152	1
ENSG00000198951	NAGA	1
ENSG00000203506	RBMS3-AS2	1
ENSG00000203667	COX20	1
ENSG00000204420	MPIG6B	1
ENSG00000204519	ZNF551	1
ENSG00000205277	MUC12	1
ENSG00000205863	C1QTNF9B	1
ENSG00000206028		1
ENSG00000206530	CFAP44	1
ENSG00000211584	SLC48A1	1
ENSG00000212807	OR2A42	1
ENSG00000214029	ZNF891	1
ENSG00000214185	XPOTP1	1
ENSG00000214562	NUTM2D	1
ENSG00000221970	OR2A1	1
ENSG00000224597	SVIL-AS1	1
ENSG00000224660	SH3BP5-AS1	1
ENSG00000225470	JPX	1
ENSG00000227028	SLC8A1-AS1	1
ENSG00000227212	PFN1P6	1
ENSG00000228492	RAB11FIP1P1	1
ENSG00000228748		1
ENSG00000229124	VIM-AS1	1
ENSG00000229732		1
ENSG00000230630	DNM3OS	1
ENSG00000231064	THBS3-AS1	1
ENSG00000231419	LINC00689	1
ENSG00000231609	EHBP1-AS1	1
ENSG00000232300	FAM215B	1
ENSG00000232928	DDX3P1	1
ENSG00000232973	CYP1B1-AS1	1
ENSG00000232993		1
ENSG00000233016	SNHG7	1
ENSG00000233885	YEATS2-AS1	1
ENSG00000234969	AARSD1P1	1
ENSG00000235590	GNAS-AS1	1
ENSG00000235872		1
ENSG00000236404	VLDLR-AS1	1
ENSG00000237036	ZEB1-AS1	1
ENSG00000237588		1
ENSG00000238057	ZEB2-AS1	1
ENSG00000238197	PAXBP1-AS1	1
ENSG00000238258		1
ENSG00000239665	NA	1
ENSG00000241472	PTPRG-AS1	1
ENSG00000243753	HLA-L	1
ENSG00000244586	WNT5A-AS1	1
ENSG00000245958	SEPTIN7P14	1
ENSG00000247033		1
ENSG00000247679		1
ENSG00000247903		1
ENSG00000247993	FOXD1-AS1	1
ENSG00000248429	GASK1B-AS1	1
ENSG00000248769		1
ENSG00000249087	ZNF436-AS1	1
ENSG00000249568		1
ENSG00000249835	VCAN-AS1	1
ENSG00000250295	RDH10-AS1	1
ENSG00000250615		1
ENSG00000250722	SELENOP	1
ENSG00000250902	SMAD1-AS1	1
ENSG00000251239		1
ENSG00000253445		1
ENSG00000253636		1
ENSG00000253764	KBTBD11-AS1	1
ENSG00000254665		1
ENSG00000254902	ANO1-AS1	1
ENSG00000255438		1
ENSG00000255857	PXN-AS1	1
ENSG00000256469		1
ENSG00000258301	NA	1
ENSG00000258334	TROAP-AS1	1
ENSG00000258425		1
ENSG00000258525		1
ENSG00000258634		1
ENSG00000259291	ZNF710-AS1	1
ENSG00000259726	CSPG4P11	1
ENSG00000259768	ZFHX3-AS1	1
ENSG00000259948		1
ENSG00000259956	RBM15B	1
ENSG00000260285	TRMT61A-DT	1
ENSG00000261054	SYNM-AS2	1
ENSG00000261312		1
ENSG00000261586		1
ENSG00000262003		1
ENSG00000262211		1
ENSG00000262691		1
ENSG00000262712		1
ENSG00000263069	RNF213-AS1	1
ENSG00000263165		1
ENSG00000263272		1
ENSG00000263276		1
ENSG00000263424		1
ENSG00000265263	NA	1
ENSG00000265369	PCAT18	1
ENSG00000266872		1
ENSG00000267328		1
ENSG00000267387		1
ENSG00000267396		1
ENSG00000267466		1
ENSG00000267469		1
ENSG00000267519	MIR23AHG	1
ENSG00000267529		1
ENSG00000267576		1
ENSG00000267601		1
ENSG00000267934		1
ENSG00000268069		1
ENSG00000268230		1
ENSG00000270392	PFN1P2	1
ENSG00000270497		1
ENSG00000270641	TSIX	1
ENSG00000270670	MARK2P16	1
ENSG00000270696		1
ENSG00000271795		1
ENSG00000272008		1
ENSG00000272078		1
ENSG00000272899	SPMIP1	1
ENSG00000273055		1
ENSG00000274021		1
ENSG00000274415		1
ENSG00000276278	NA	1
ENSG00000276710	CSPG4P10	1
ENSG00000277443	MARCKS	1
ENSG00000277801		1
ENSG00000278766		1
ENSG00000278872		1
ENSG00000278879		1
ENSG00000279119		1
ENSG00000279296	PRAL	1
ENSG00000279417		1
ENSG00000279437		1
ENSG00000279694		1
ENSG00000279696		1
ENSG00000279753		1
ENSG00000279825		1
ENSG00000279912		1
ENSG00000280109	PLAC4	1
ENSG00000280385		1
ENSG00000280414		1
ENSG00000283208		1
ENSG00000284946		1
ENSG00000284966		1
ENSG00000285278		1
ENSG00000285444		1
ENSG00000285813		1
ENSG00000285957		1
ENSG00000008853	RHOBTB2	2
ENSG00000009954	BAZ1B	2
ENSG00000013810	TACC3	2
ENSG00000018280	SLC11A1	2
ENSG00000059691	GATB	2
ENSG00000065328	MCM10	2
ENSG00000066230	SLC9A3	2
ENSG00000072818	ACAP1	2
ENSG00000077800	FKBP6	2
ENSG00000078687	TNRC6C	2
ENSG00000079805	DNM2	2
ENSG00000081692	JMJD4	2
ENSG00000082293	COL19A1	2
ENSG00000084073	ZMPSTE24	2
ENSG00000087302	RTRAF	2
ENSG00000099326	MZF1	2
ENSG00000099869	IGF2-AS	2
ENSG00000099904	ZDHHC8	2
ENSG00000100395	L3MBTL2	2
ENSG00000100600	LGMN	2
ENSG00000100815	TRIP11	2
ENSG00000101190	TCFL5	2
ENSG00000102362	SYTL4	2
ENSG00000102934	PLLP	2
ENSG00000103227	LMF1	2
ENSG00000103260	METRN	2
ENSG00000103266	STUB1	2
ENSG00000105662	CRTC1	2
ENSG00000105928	GSDME	2
ENSG00000107185	RGP1	2
ENSG00000107551	RASSF4	2
ENSG00000108469	RECQL5	2
ENSG00000108798	ABI3	2
ENSG00000108823	SGCA	2
ENSG00000111203	ITFG2	2
ENSG00000111671	SPSB2	2
ENSG00000111817	DSE	2
ENSG00000114388	NPRL2	2
ENSG00000115317	HTRA2	2
ENSG00000117242	PINK1-AS	2
ENSG00000117682	DHDDS	2
ENSG00000120832	MTERF2	2
ENSG00000122432	SPATA1	2
ENSG00000123154	WDR83	2
ENSG00000123454	DBH	2
ENSG00000124134	KCNS1	2
ENSG00000124588	NQO2	2
ENSG00000125868	DSTN	2
ENSG00000125966	MMP24	2
ENSG00000126562	WNK4	2
ENSG00000126778	SIX1	2
ENSG00000127580	WDR24	2
ENSG00000131398	KCNC3	2
ENSG00000131969	ABHD12B	2
ENSG00000132600	PRMT7	2
ENSG00000133401	PDZD2	2
ENSG00000134243	SORT1	2
ENSG00000135473	PAN2	2
ENSG00000135679	MDM2	2
ENSG00000136457	CHAD	2
ENSG00000136536	MARCHF7	2
ENSG00000137288	UQCC2	2
ENSG00000137819	PAQR5	2
ENSG00000139438	FAM222A	2
ENSG00000139651	ZNF740	2
ENSG00000140009	ESR2	2
ENSG00000140398	NEIL1	2
ENSG00000140548	ZNF710	2
ENSG00000140992	PDPK1	2
ENSG00000141337	ARSG	2
ENSG00000141551	CSNK1D	2
ENSG00000142453	CARM1	2
ENSG00000143882	ATP6V1C2	2
ENSG00000144161	ZC3H8	2
ENSG00000146722	FKBP6P2	2
ENSG00000147408	CSGALNACT1	2
ENSG00000149016	TUT1	2
ENSG00000152700	SAR1B	2
ENSG00000153048	CARHSP1	2
ENSG00000153976	HS3ST3A1	2
ENSG00000155252	PI4K2A	2
ENSG00000156097	GPR61	2
ENSG00000157734	SNX22	2
ENSG00000157873	TNFRSF14	2
ENSG00000158014	SLC30A2	2
ENSG00000158623	COPG2	2
ENSG00000159173	TNNI1	2
ENSG00000161091	MFSD12	2
ENSG00000161671	EMC10	2
ENSG00000162576	MXRA8	2
ENSG00000162585	FAAP20	2
ENSG00000163431	LMOD1	2
ENSG00000163931	TKT	2
ENSG00000164061	BSN	2
ENSG00000164713	BRI3	2
ENSG00000165416	SUGT1	2
ENSG00000165650	PDZD8	2
ENSG00000166793	YPEL4	2
ENSG00000166912	MTMR10	2
ENSG00000167395	ZNF646	2
ENSG00000167524	RSKR	2
ENSG00000167676	PLIN4	2
ENSG00000167778	SPRYD3	2
ENSG00000168924	LETM1	2
ENSG00000170275	CRTAP	2
ENSG00000172183	ISG20	2
ENSG00000172345	STARD5	2
ENSG00000172366	MCRIP2	2
ENSG00000172508	CARNS1	2
ENSG00000172794	RAB37	2
ENSG00000173065	FAM222B	2
ENSG00000173171	MTX1	2
ENSG00000174945	AMZ1	2
ENSG00000175463	TBC1D10C	2
ENSG00000175792	RUVBL1	2
ENSG00000178409	BEND3	2
ENSG00000180104	EXOC3	2
ENSG00000181350	LRRC75A	2
ENSG00000181541	MAB21L2	2
ENSG00000182168	UNC5C	2
ENSG00000182397	DNM1P46	2
ENSG00000182873	PRKCZ-AS1	2
ENSG00000183092	BEGAIN	2
ENSG00000183978	COA3	2
ENSG00000184441		2
ENSG00000185176	AQP12B	2
ENSG00000185361	TNFAIP8L1	2
ENSG00000185532	PRKG1	2
ENSG00000185567	AHNAK2	2
ENSG00000186056	MATN1-AS1	2
ENSG00000186399	GOLGA8R	2
ENSG00000186834	HEXIM1	2
ENSG00000187325	TAF9B	2
ENSG00000187942	LDLRAD2	2
ENSG00000188315	C3orf62	2
ENSG00000188760	TMEM198	2
ENSG00000189143	CLDN4	2
ENSG00000189339	SLC35E2B	2
ENSG00000196313	POM121	2
ENSG00000196436	NPIPB15	2
ENSG00000196696	PDXDC2P-NPIPB14P	2
ENSG00000196968	FUT11	2
ENSG00000198589	LRBA	2
ENSG00000203392		2
ENSG00000204183	GDF5-AS1	2
ENSG00000204231	RXRB	2
ENSG00000204859	ZBTB48	2
ENSG00000205918	PDPK2P	2
ENSG00000213221	DNLZ	2
ENSG00000213222	TOMM40P4	2
ENSG00000214688	C10orf105	2
ENSG00000218537	MIF-AS1	2
ENSG00000224407		2
ENSG00000224614	TNK2-AS1	2
ENSG00000224721	FLVCR2-AS1	2
ENSG00000224963	ECMXP	2
ENSG00000225028		2
ENSG00000225151	GOLGA2P7	2
ENSG00000225420		2
ENSG00000226232	NPIPB14P	2
ENSG00000226380	NA	2
ENSG00000227014	FKBP14-AS1	2
ENSG00000227036	LINC00511	2
ENSG00000228109	MELTF-AS1	2
ENSG00000229743	LINC01159	2
ENSG00000230530	LIMD1-AS1	2
ENSG00000230736		2
ENSG00000230928		2
ENSG00000231721	LINC-PINT	2
ENSG00000233110	SORBS2-AS1	2
ENSG00000235257	ITGA9-AS1	2
ENSG00000236383	CCDC200	2
ENSG00000237301		2
ENSG00000240057	NEPRO-AS1	2
ENSG00000243802		2
ENSG00000244161	FLNB-AS1	2
ENSG00000245904	BTG1-DT	2
ENSG00000247315	ZCCHC3	2
ENSG00000248774		2
ENSG00000250397		2
ENSG00000251596	HADHAP1	2
ENSG00000251675		2
ENSG00000253438	PCAT1	2
ENSG00000253552	HOXA-AS2	2
ENSG00000254340		2
ENSG00000254369	HOXA-AS3	2
ENSG00000254656	RTL1	2
ENSG00000254740	NA	2
ENSG00000255508		2
ENSG00000255867	DENND5B-AS1	2
ENSG00000256040	PAPPA-AS1	2
ENSG00000257950	P2RX5-TAX1BP3	2
ENSG00000257985		2
ENSG00000258377		2
ENSG00000258727	AP1G2-AS1	2
ENSG00000258952	SALRNA1	2
ENSG00000259172	SNRPA1-DT	2
ENSG00000259583	ALDH1A3-AS1	2
ENSG00000259884	NR4A1AS	2
ENSG00000260091		2
ENSG00000260892		2
ENSG00000261505		2
ENSG00000261604		2
ENSG00000261884		2
ENSG00000262831		2
ENSG00000263585	PYCR1-AS1	2
ENSG00000264985		2
ENSG00000265168	ALDOC-AS1	2
ENSG00000265401		2
ENSG00000265474		2
ENSG00000266718		2
ENSG00000267598		2
ENSG00000267801		2
ENSG00000267815		2
ENSG00000268366	SERTAD3-AS1	2
ENSG00000269068		2
ENSG00000269926	NA	2
ENSG00000269968		2
ENSG00000270823		2
ENSG00000271204		2
ENSG00000271806		2
ENSG00000272235		2
ENSG00000272694		2
ENSG00000272916		2
ENSG00000273521		2
ENSG00000274177		2
ENSG00000275719		2
ENSG00000276101		2
ENSG00000276931		2
ENSG00000278177		2
ENSG00000278621	THBS1-AS1	2
ENSG00000278977		2
ENSG00000279057		2
ENSG00000279569		2
ENSG00000280195		2
ENSG00000280213	UCKL1-AS1	2
ENSG00000280294		2
ENSG00000280435		2
ENSG00000280634	THRIL	2
ENSG00000280780	JAKMIP2-AS1	2
ENSG00000282951		2
ENSG00000284669		2
ENSG00000284708		2
ENSG00000285106	NA	2
ENSG00000285612		2
ENSG00000285850		2
ENSG00000285886		2
ENSG00000285905	BMP8B-AS1	2
ENSG00000005513	SOX8	3
ENSG00000006747	SCIN	3
ENSG00000029559	IBSP	3
ENSG00000049089	COL9A2	3
ENSG00000054598	FOXC1	3
ENSG00000060718	COL11A1	3
ENSG00000067225	PKM	3
ENSG00000068078	FGFR3	3
ENSG00000069188	SDK2	3
ENSG00000074800	ENO1	3
ENSG00000077274	CAPN6	3
ENSG00000082196	C1QTNF3	3
ENSG00000083444	PLOD1	3
ENSG00000083782	EPYC	3
ENSG00000084636	COL16A1	3
ENSG00000087303	NID2	3
ENSG00000090615	GOLGA3	3
ENSG00000092758	COL9A3	3
ENSG00000095066	HOOK2	3
ENSG00000095637	SORBS1	3
ENSG00000099194	SCD	3
ENSG00000100678	SLC8A3	3
ENSG00000102313	ITIH6	3
ENSG00000103489	XYLT1	3
ENSG00000105357	MYH14	3
ENSG00000105664	COMP	3
ENSG00000106624	AEBP1	3
ENSG00000109472	CPE	3
ENSG00000111077	TNS2	3
ENSG00000111640	GAPDH	3
ENSG00000112280	COL9A1	3
ENSG00000112562	SMOC2	3
ENSG00000113140	SPARC	3
ENSG00000113384	GOLPH3	3
ENSG00000113721	PDGFRB	3
ENSG00000115380	EFEMP1	3
ENSG00000115414	FN1	3
ENSG00000117394	SLC2A1	3
ENSG00000118523	CCN2	3
ENSG00000118785	SPP1	3
ENSG00000120738	EGR1	3
ENSG00000122176	FMOD	3
ENSG00000123358	NR4A1	3
ENSG00000123384	LRP1	3
ENSG00000123500	COL10A1	3
ENSG00000123989	CHPF	3
ENSG00000124006	OBSL1	3
ENSG00000124159	MATN4	3
ENSG00000125398	SOX9	3
ENSG00000125844	RRBP1	3
ENSG00000127418	FGFRL1	3
ENSG00000127990	SGCE	3
ENSG00000130600	H19	3
ENSG00000131459	GFPT2	3
ENSG00000132031	MATN3	3
ENSG00000133112	TPT1	3
ENSG00000134291	TMEM106C	3
ENSG00000136026	CKAP4	3
ENSG00000136110	CNMD	3
ENSG00000137441	FGFBP2	3
ENSG00000137801	THBS1	3
ENSG00000138131	LOXL4	3
ENSG00000139219	COL2A1	3
ENSG00000140988	RPS2	3
ENSG00000142798	HSPG2	3
ENSG00000142871	CCN1	3
ENSG00000143127	ITGA10	3
ENSG00000144152	FBLN7	3
ENSG00000145681	HAPLN1	3
ENSG00000149257	SERPINH1	3
ENSG00000152592	DMP1	3
ENSG00000152952	PLOD2	3
ENSG00000157322	CLEC18A	3
ENSG00000157766	ACAN	3
ENSG00000158008	EXTL1	3
ENSG00000160307	S100B	3
ENSG00000160678	S100A1	3
ENSG00000160888	IER2	3
ENSG00000162510	MATN1	3
ENSG00000162998	FRZB	3
ENSG00000163501	IHH	3
ENSG00000163975	MELTF	3
ENSG00000164176	EDIL3	3
ENSG00000165623	UCMA	3
ENSG00000167123	CERCAM	3
ENSG00000167244	IGF2	3
ENSG00000167476	JSRP1	3
ENSG00000170345	FOS	3
ENSG00000171310	CHST11	3
ENSG00000172201	ID4	3
ENSG00000173546	CSPG4	3
ENSG00000176971	FIBIN	3
ENSG00000182600	SNORC	3
ENSG00000183098	GPC6	3
ENSG00000185559	DLK1	3
ENSG00000187955	COL14A1	3
ENSG00000188783	PRELP	3
ENSG00000189171	S100A13	3
ENSG00000196739	COL27A1	3
ENSG00000197102	DYNC1H1	3
ENSG00000198300	PEG3	3
ENSG00000198373	WWP2	3
ENSG00000198914	POU3F3	3
ENSG00000204248	COL11A2	3
ENSG00000204291	COL15A1	3
ENSG00000214548	MEG3	3
ENSG00000225606		3
ENSG00000225614	ZNF469	3
ENSG00000227220	NA	3
ENSG00000235522		3
ENSG00000242265	PEG10	3
ENSG00000253102		3
ENSG00000266028	SRGAP2	3
ENSG00000272030	NA	3
ENSG00000273149		3
ENSG00000008441	NFIX	4
ENSG00000026025	VIM	4
ENSG00000035862	TIMP2	4
ENSG00000041982	TNC	4
ENSG00000049540	ELN	4
ENSG00000050165	DKK3	4
ENSG00000064300	NGFR	4
ENSG00000070366	SMG6	4
ENSG00000080503	SMARCA2	4
ENSG00000089225	TBX5	4
ENSG00000100345	MYH9	4
ENSG00000101825	MXRA5	4
ENSG00000105894	PTN	4
ENSG00000107731	UNC5B	4
ENSG00000108821	COL1A1	4
ENSG00000111799	COL12A1	4
ENSG00000112902	SEMA5A	4
ENSG00000115457	IGFBP2	4
ENSG00000115461	IGFBP5	4
ENSG00000116132	PRRX1	4
ENSG00000124942	AHNAK	4
ENSG00000130635	COL5A1	4
ENSG00000133110	POSTN	4
ENSG00000136295	TTYH3	4
ENSG00000138829	FBN2	4
ENSG00000140937	CDH11	4
ENSG00000142156	COL6A1	4
ENSG00000142173	COL6A2	4
ENSG00000160789	LMNA	4
ENSG00000163359	COL6A3	4
ENSG00000163520	FBLN2	4
ENSG00000164692	COL1A2	4
ENSG00000164694	FNDC1	4
ENSG00000166147	FBN1	4
ENSG00000168542	COL3A1	4
ENSG00000169554	ZEB2	4
ENSG00000169604	ANTXR1	4
ENSG00000170004	CHD3	4
ENSG00000175274	TP53I11	4
ENSG00000178695	KCTD12	4
ENSG00000180447	GAS1	4
ENSG00000182492	BGN	4
ENSG00000183160	TMEM119	4
ENSG00000185650	ZFP36L1	4
ENSG00000186340	THBS2	4
ENSG00000187498	COL4A1	4
ENSG00000188536	HBA2	4
ENSG00000189060	H1-0	4
ENSG00000189184	PCDH18	4
ENSG00000197256	KANK2	4
ENSG00000197467	COL13A1	4
ENSG00000204262	COL5A2	4
ENSG00000210082	MT-RNR2	4
ENSG00000211459	MT-RNR1	4
ENSG00000213694	S1PR3	4
ENSG00000251562	MALAT1	4
ENSG00000254772	EEF1G	4

## Sheet: Early Module GO Enrichments
ID	Description	GeneRatio	BgRatio	RichFactor	FoldEnrichment	zScore	pvalue	p.adjust	qvalue	geneID	Count	gene_set
GO:0048705	skeletal system morphogenesis	'23/212'	221/16001	0.104072	7.85501	11.8905	1.95e-14	5.19e-11	4.7e-11	HOXA11/COL11A1/FGFR3/ZMPSTE24/TBX15/TRIP11/COMP/COL1A1/PRRX1/SATB2/RDH10/TBX4/TWIST1/SIX1/HOXD9/HOXD10/TFAP2A/COL2A1/MATN1/MSX1/SOX11/COL27A1/IFITM5	23	ALL_DEGs
GO:0051216	cartilage development	'22/212'	204/16001	0.107843	8.13961	11.892	3.53e-14	5.19e-11	4.7e-11	HOXA11/CD44/COL11A1/FGFR3/PITX1/EPYC/ZMPSTE24/TRIP11/COMP/COL1A1/WNT5A/EFEMP1/PRRX1/SATB2/MATN3/CNMD/COL2A1/MATN1/MSX1/SNORC/COL27A1/COL11A2	22	ALL_DEGs
GO:0048706	embryonic skeletal system development	'16/212'	125/16001	0.128	9.66098	11.2642	8.93e-12	8.75e-09	7.92e-09	HOXA11/COL11A1/TBX15/XYLT1/COL1A1/WNT5A/PRRX1/SATB2/RDH10/TWIST1/SIX1/HOXD9/HOXD10/TFAP2A/COL2A1/SOX11	16	ALL_DEGs
GO:0061448	connective tissue development	'22/212'	279/16001	0.078853	5.95155	9.66807	2.02e-11	1.48e-08	1.34e-08	HOXA11/CD44/COL11A1/FGFR3/PITX1/EPYC/ZMPSTE24/TRIP11/COMP/COL1A1/WNT5A/EFEMP1/PRRX1/SATB2/MATN3/CNMD/COL2A1/MATN1/MSX1/SNORC/COL27A1/COL11A2	22	ALL_DEGs
GO:0035107	appendage morphogenesis	'16/212'	149/16001	0.107383	8.10485	10.0962	1.33e-10	5.77e-08	5.22e-08	HOXA11/TFAP2B/PITX1/FGF10/TBX5/WNT5A/PRRX1/RDH10/TBX4/TWIST1/HOXD9/HOXD10/TFAP2A/COL2A1/MSX1/HOXD12	16	ALL_DEGs
GO:0035108	limb morphogenesis	'16/212'	149/16001	0.107383	8.10485	10.0962	1.33e-10	5.77e-08	5.22e-08	HOXA11/TFAP2B/PITX1/FGF10/TBX5/WNT5A/PRRX1/RDH10/TBX4/TWIST1/HOXD9/HOXD10/TFAP2A/COL2A1/MSX1/HOXD12	16	ALL_DEGs
GO:0030198	extracellular matrix organization	'22/212'	310/16001	0.0709677	5.35639	8.97497	1.56e-10	5.77e-08	5.22e-08	IBSP/GPM6B/COL9A2/COL11A1/COL17A1/COL9A3/COMP/COL1A1/COL12A1/COL9A1/MATN3/COL2A1/COL8A1/ADAMTS19/GAS2/MATN1/COL1A2/ADAMTSL1/COL27A1/COL11A2/COL15A1/ZNF469	22	ALL_DEGs
GO:0043062	extracellular structure organization	'22/212'	311/16001	0.0707395	5.33917	8.95418	1.66e-10	5.77e-08	5.22e-08	IBSP/GPM6B/COL9A2/COL11A1/COL17A1/COL9A3/COMP/COL1A1/COL12A1/COL9A1/MATN3/COL2A1/COL8A1/ADAMTS19/GAS2/MATN1/COL1A2/ADAMTSL1/COL27A1/COL11A2/COL15A1/ZNF469	22	ALL_DEGs
GO:0045229	external encapsulating structure organization	'22/212'	312/16001	0.0705128	5.32205	8.93348	1.77e-10	5.77e-08	5.22e-08	IBSP/GPM6B/COL9A2/COL11A1/COL17A1/COL9A3/COMP/COL1A1/COL12A1/COL9A1/MATN3/COL2A1/COL8A1/ADAMTS19/GAS2/MATN1/COL1A2/ADAMTSL1/COL27A1/COL11A2/COL15A1/ZNF469	22	ALL_DEGs
GO:0048704	embryonic skeletal system morphogenesis	'13/212'	91/16001	0.142857	10.7823	10.8437	2.07e-10	6.09e-08	5.51e-08	HOXA11/COL11A1/TBX15/PRRX1/SATB2/RDH10/TWIST1/SIX1/HOXD9/HOXD10/TFAP2A/COL2A1/SOX11	13	ALL_DEGs
GO:0048736	appendage development	'17/212'	184/16001	0.0923913	6.97336	9.44314	3.74e-10	9.15e-08	8.28e-08	HOXA11/TFAP2B/PITX1/FGF10/TBX5/COMP/WNT5A/PRRX1/RDH10/TBX4/TWIST1/HOXD9/HOXD10/TFAP2A/COL2A1/MSX1/HOXD12	17	ALL_DEGs
GO:0060173	limb development	'17/212'	184/16001	0.0923913	6.97336	9.44314	3.74e-10	9.15e-08	8.28e-08	HOXA11/TFAP2B/PITX1/FGF10/TBX5/COMP/WNT5A/PRRX1/RDH10/TBX4/TWIST1/HOXD9/HOXD10/TFAP2A/COL2A1/MSX1/HOXD12	17	ALL_DEGs
GO:0060349	bone morphogenesis	'13/212'	97/16001	0.134021	10.1154	10.4342	4.7e-10	1.06e-07	9.61e-08	HOXA11/FGFR3/ZMPSTE24/TRIP11/COMP/COL1A1/TWIST1/TFAP2A/COL2A1/MATN1/MSX1/COL27A1/IFITM5	13	ALL_DEGs
GO:0035136	forelimb morphogenesis	'9/212'	41/16001	0.219512	16.568	11.5653	2.58e-09	5.41e-07	4.89e-07	HOXA11/TFAP2B/TBX5/RDH10/TWIST1/HOXD9/HOXD10/TFAP2A/MSX1	9	ALL_DEGs
GO:0048568	embryonic organ development	'24/212'	434/16001	0.0552995	4.17381	7.76737	3.46e-09	6.78e-07	6.13e-07	HOXA11/COL11A1/FGF10/VASH1/TBX15/WNT5A/EFEMP1/PRRX1/SATB2/RDH10/TBX4/TWIST1/SIX1/HOXD9/HOXD10/TFAP2A/COL2A1/VASH2/MSX1/IGF2/SOX11/NR2F2/COL27A1/PLXNA4	24	ALL_DEGs
GO:0030326	embryonic limb morphogenesis	'13/212'	121/16001	0.107438	8.10904	9.09555	7.49e-09	1.29e-06	1.17e-06	HOXA11/PITX1/TBX5/WNT5A/PRRX1/RDH10/TBX4/TWIST1/HOXD9/HOXD10/TFAP2A/MSX1/HOXD12	13	ALL_DEGs
GO:0035113	embryonic appendage morphogenesis	'13/212'	121/16001	0.107438	8.10904	9.09555	7.49e-09	1.29e-06	1.17e-06	HOXA11/PITX1/TBX5/WNT5A/PRRX1/RDH10/TBX4/TWIST1/HOXD9/HOXD10/TFAP2A/MSX1/HOXD12	13	ALL_DEGs
GO:0060351	cartilage development involved in endochondral bone morphogenesis	'8/212'	33/16001	0.242424	18.2973	11.5255	8.69e-09	1.42e-06	1.28e-06	HOXA11/ZMPSTE24/TRIP11/COMP/COL1A1/COL2A1/MATN1/COL27A1	8	ALL_DEGs
GO:0060348	bone development	'16/212'	210/16001	0.0761905	5.75058	8.02976	2.03e-08	3.14e-06	2.84e-06	HOXA11/FGFR3/PTPRC/EPYC/ZMPSTE24/TRIP11/XYLT1/COMP/COL1A1/TWIST1/TFAP2A/COL2A1/MATN1/MSX1/COL27A1/IFITM5	16	ALL_DEGs
GO:0060350	endochondral bone morphogenesis	'9/212'	60/16001	0.15	11.3215	9.28132	8.74e-08	1.28e-05	1.16e-05	HOXA11/FGFR3/ZMPSTE24/TRIP11/COMP/COL1A1/COL2A1/MATN1/COL27A1	9	ALL_DEGs
GO:0001503	ossification	'21/212'	415/16001	0.0506024	3.81929	6.7429	1.58e-07	2.21e-05	2e-05	IBSP/GPM6B/COL11A1/FGFR3/ZMPSTE24/XYLT1/COMP/COL1A1/WNT5A/SATB2/TWIST1/TFAP2A/COL2A1/CDH11/IGSF10/MATN1/COL1A2/IGF2/SOX11/FZD9/IFITM5	21	ALL_DEGs
GO:0035115	embryonic forelimb morphogenesis	'7/212'	33/16001	0.212121	16.0101	10.0015	2.07e-07	2.76e-05	2.5e-05	HOXA11/TBX5/RDH10/TWIST1/HOXD9/TFAP2A/MSX1	7	ALL_DEGs
GO:0048562	embryonic organ morphogenesis	'17/212'	283/16001	0.0600707	4.53392	6.95027	2.34e-07	2.99e-05	2.7e-05	HOXA11/COL11A1/FGF10/TBX15/WNT5A/EFEMP1/PRRX1/SATB2/RDH10/TWIST1/SIX1/HOXD9/HOXD10/TFAP2A/COL2A1/MSX1/SOX11	17	ALL_DEGs
GO:0060021	roof of mouth development	'10/212'	89/16001	0.11236	8.4805	8.2	2.76e-07	3.37e-05	3.05e-05	WNT5A/PRRX1/SATB2/TWIST1/WFIKKN1/TFAP2A/COL2A1/MSX1/SOX11/COL11A2	10	ALL_DEGs
GO:0035137	hindlimb morphogenesis	'7/212'	35/16001	0.2	15.0953	9.67298	3.19e-07	3.74e-05	3.39e-05	TFAP2B/PITX1/TBX4/TWIST1/HOXD9/HOXD10/MSX1	7	ALL_DEGs
GO:0030282	bone mineralization	'11/212'	123/16001	0.0894309	6.74992	7.41767	7.18e-07	8.11e-05	7.34e-05	IBSP/GPM6B/FGFR3/ZMPSTE24/COMP/TWIST1/TFAP2A/MATN1/COL1A2/FZD9/IFITM5	11	ALL_DEGs
GO:0060537	muscle tissue development	'19/212'	407/16001	0.046683	3.52347	5.9754	2.1e-06	0.0002291	0.00020727	CACNA1G/TFAP2B/HDAC9/COL11A1/PITX1/ZMPSTE24/TBX5/MYH14/WNT5A/TWIST1/SIX1/HOXD9/HOXD10/TNNI1/MSX1/IGF2/SOX11/NR2F2/NRAP	19	ALL_DEGs
GO:0030199	collagen fibril organization	'8/212'	65/16001	0.123077	9.2894	7.75963	2.2e-06	0.00023056	0.00020859	COL11A1/COMP/COL1A1/COL12A1/COL2A1/COL1A2/COL27A1/COL11A2	8	ALL_DEGs
GO:0090596	sensory organ morphogenesis	'15/212'	263/16001	0.0570342	4.30474	6.26168	2.34e-06	0.00023704	0.00021445	TFAP2B/COL11A1/SDK2/FGF10/WNT5A/EFEMP1/PRRX1/TWIST1/SIX1/TFAP2A/COL2A1/COL8A1/MEGF11/MSX1/SOX11	15	ALL_DEGs
GO:0031214	biomineral tissue development	'12/212'	168/16001	0.0714286	5.39117	6.62986	2.47e-06	0.00024234	0.00021925	IBSP/GPM6B/FGFR3/ZMPSTE24/COMP/COL1A1/TWIST1/TFAP2A/MATN1/COL1A2/FZD9/IFITM5	12	ALL_DEGs
GO:0030278	regulation of ossification	'10/212'	117/16001	0.0854701	6.45098	6.85706	3.5e-06	0.00033212	0.00030047	GPM6B/ZMPSTE24/COMP/WNT5A/TWIST1/TFAP2A/MATN1/SOX11/FZD9/IFITM5	10	ALL_DEGs
GO:0060900	embryonic camera-type eye formation	'4/212'	10/16001	0.4	30.1906	10.6993	5.91e-06	0.00054276	0.00049104	WNT5A/TWIST1/TFAP2A/SOX11	4	ALL_DEGs
GO:0031076	embryonic camera-type eye development	'6/212'	36/16001	0.166667	12.5794	8.05942	7.04e-06	0.00062738	0.0005676	FGF10/WNT5A/RDH10/TWIST1/TFAP2A/SOX11	6	ALL_DEGs
GO:0030500	regulation of bone mineralization	'8/212'	78/16001	0.102564	7.74117	6.91546	8.81e-06	0.0007612	0.00068867	GPM6B/ZMPSTE24/COMP/TWIST1/TFAP2A/MATN1/FZD9/IFITM5	8	ALL_DEGs
GO:0007517	muscle organ development	'16/212'	341/16001	0.0469208	3.54142	5.49677	1.3e-05	0.00108932	0.00098552	HDAC9/COL11A1/PITX1/MYH14/WNT5A/TWIST1/SIX1/HOXD9/HOXD10/TNNI1/MSX1/IGF2/EID2B/BASP1/SOX11/NR2F2	16	ALL_DEGs
GO:0048701	embryonic cranial skeleton morphogenesis	'6/212'	43/16001	0.139535	10.5316	7.25205	2.04e-05	0.00166624	0.00150747	TBX15/PRRX1/RDH10/TWIST1/SIX1/TFAP2A	6	ALL_DEGs
GO:0002062	chondrocyte differentiation	'9/212'	115/16001	0.0782609	5.90685	6.11921	2.22e-05	0.00176182	0.00159394	HOXA11/COL11A1/FGFR3/TRIP11/COMP/EFEMP1/COL2A1/MATN1/COL27A1	9	ALL_DEGs
GO:0060538	skeletal muscle organ development	'11/212'	177/16001	0.0621469	4.69062	5.72109	2.44e-05	0.0018835	0.00170403	HDAC9/PITX1/MYH14/TWIST1/SIX1/HOXD9/HOXD10/IGF2/BASP1/SOX11/NR2F2	11	ALL_DEGs
GO:0042471	ear morphogenesis	'9/212'	118/16001	0.0762712	5.75668	6.00937	2.73e-05	0.0020537	0.00185801	COL11A1/FGF10/WNT5A/PRRX1/TWIST1/SIX1/TFAP2A/COL2A1/MSX1	9	ALL_DEGs
GO:0003416	endochondral bone growth	'5/212'	28/16001	0.178571	13.4779	7.65736	2.99e-05	0.00219381	0.00198477	FGFR3/ZMPSTE24/COMP/MATN1/COL27A1	5	ALL_DEGs
GO:0070167	regulation of biomineral tissue development	'8/212'	97/16001	0.0824742	6.22486	5.98078	4.38e-05	0.00313827	0.00283923	GPM6B/ZMPSTE24/COMP/TWIST1/TFAP2A/MATN1/FZD9/IFITM5	8	ALL_DEGs
GO:0098868	bone growth	'5/212'	31/16001	0.16129	12.1736	7.2156	5e-05	0.00349729	0.00316404	FGFR3/ZMPSTE24/COMP/MATN1/COL27A1	5	ALL_DEGs
GO:0002063	chondrocyte development	'5/212'	32/16001	0.15625	11.7932	7.08168	5.86e-05	0.00400518	0.00362354	HOXA11/COL11A1/COMP/MATN1/COL27A1	5	ALL_DEGs
GO:0007519	skeletal muscle tissue development	'10/212'	166/16001	0.060241	4.54677	5.32266	7.44e-05	0.00496638	0.00449314	HDAC9/PITX1/MYH14/TWIST1/SIX1/HOXD9/HOXD10/IGF2/SOX11/NR2F2	10	ALL_DEGs
GO:0048048	embryonic eye morphogenesis	'5/212'	34/16001	0.147059	11.0995	6.83089	7.92e-05	0.00517568	0.0046825	WNT5A/EFEMP1/TWIST1/TFAP2A/SOX11	5	ALL_DEGs
GO:0003417	growth plate cartilage development	'4/212'	19/16001	0.210526	15.8898	7.52489	9.93e-05	0.00621031	0.00561854	ZMPSTE24/COMP/MATN1/COL27A1	4	ALL_DEGs
GO:0060602	branch elongation of an epithelium	'4/212'	19/16001	0.210526	15.8898	7.52489	9.93e-05	0.00621031	0.00561854	FGF10/WNT5A/RDH10/SIX1	4	ALL_DEGs
GO:0043583	ear development	'11/212'	208/16001	0.0528846	3.99154	5.03205	0.00010556	0.00646313	0.00584727	COL11A1/FGF10/TRIP11/WNT5A/PRRX1/RDH10/TWIST1/SIX1/TFAP2A/COL2A1/MSX1	11	ALL_DEGs
GO:0045165	cell fate commitment	'12/212'	247/16001	0.048583	3.66687	4.89447	0.00011541	0.00692196	0.00626237	HOXA11/PITX1/FGF10/TBX5/TBX15/WNT5A/PRRX1/TBX4/SIX1/HOXD10/CHD3/NR2F2	12	ALL_DEGs
GO:0043516	regulation of DNA damage response, signal transduction by p53 class mediator	'5/212'	38/16001	0.131579	9.93111	6.3869	0.00013693	0.00804895	0.00728198	CD44/ZMPSTE24/TWIST1/MDM2/MSX1	5	ALL_DEGs
GO:0048645	animal organ formation	'6/212'	63/16001	0.0952381	7.18823	5.70257	0.00018254	0.0105195	0.00951714	HOXA11/FGF10/TBX5/WNT5A/RDH10/SIX1	6	ALL_DEGs
GO:0001935	endothelial cell proliferation	'9/212'	152/16001	0.0592105	4.469	4.97938	0.00019408	0.0109693	0.00992402	FGF10/VASH1/WNT5A/CNMD/VASH2/COL8A1/EMC10/IGF2/NR2F2	9	ALL_DEGs
GO:0010842	retina layer formation	'4/212'	23/16001	0.173913	13.1263	6.74346	0.00021766	0.0117938	0.01067	TFAP2B/SDK2/TFAP2A/MEGF11	4	ALL_DEGs
GO:0003231	cardiac ventricle development	'8/212'	122/16001	0.0655738	4.94927	5.07383	0.00022	0.0117938	0.01067	COL11A1/ZMPSTE24/TBX5/TRIP11/WNT5A/MDM2/TNNI1/SOX11	8	ALL_DEGs
GO:0035265	organ growth	'9/212'	155/16001	0.0580645	4.3825	4.90337	0.00022472	0.0117938	0.01067	FGFR3/FGF10/ZMPSTE24/TBX5/COMP/MATN1/IGF2/BASP1/COL27A1	9	ALL_DEGs
GO:0048592	eye morphogenesis	'9/212'	155/16001	0.0580645	4.3825	4.90337	0.00022472	0.0117938	0.01067	TFAP2B/SDK2/WNT5A/EFEMP1/TWIST1/TFAP2A/COL8A1/MEGF11/SOX11	9	ALL_DEGs
GO:0001708	cell fate specification	'7/212'	95/16001	0.0736842	5.56142	5.16692	0.0002675	0.0137927	0.0124784	HOXA11/TBX5/TBX15/TBX4/SIX1/HOXD10/CHD3	7	ALL_DEGs
GO:0048483	autonomic nervous system development	'5/212'	44/16001	0.113636	8.57687	5.83164	0.00027779	0.0138662	0.0125449	TFAP2B/SIX1/TFAP2A/SOX11/PLXNA4	5	ALL_DEGs
GO:1904888	cranial skeletal system development	'6/212'	68/16001	0.0882353	6.65968	5.41937	0.00027836	0.0138662	0.0125449	TBX15/PRRX1/RDH10/TWIST1/SIX1/TFAP2A	6	ALL_DEGs
GO:0007389	pattern specification process	'16/212'	443/16001	0.0361174	2.72601	4.26893	0.00028336	0.01388	0.0125574	HOXA11/FGF10/TBX5/LHX2/WNT5A/SATB2/SIX1/HOXD9/HOXD10/HOXD11/BHLHE40/SHROOM3/MSX1/HOXD12/BASP1/NR2F2	16	ALL_DEGs
GO:0042472	inner ear morphogenesis	'7/212'	97/16001	0.072165	5.44675	5.0901	0.00030413	0.0140204	0.0126844	COL11A1/FGF10/WNT5A/PRRX1/SIX1/TFAP2A/COL2A1	7	ALL_DEGs
GO:0003156	regulation of animal organ formation	'4/212'	25/16001	0.16	12.0762	6.42212	0.00030455	0.0140204	0.0126844	HOXA11/FGF10/WNT5A/SIX1	4	ALL_DEGs
GO:0048596	embryonic camera-type eye morphogenesis	'4/212'	25/16001	0.16	12.0762	6.42212	0.00030455	0.0140204	0.0126844	WNT5A/TWIST1/TFAP2A/SOX11	4	ALL_DEGs
GO:0048593	camera-type eye morphogenesis	'8/212'	128/16001	0.0625	4.71728	4.89273	0.00030531	0.0140204	0.0126844	TFAP2B/SDK2/WNT5A/TWIST1/TFAP2A/COL8A1/MEGF11/SOX11	8	ALL_DEGs
GO:2000648	positive regulation of stem cell proliferation	'5/212'	46/16001	0.108696	8.20396	5.6696	0.00034318	0.015517	0.0140384	FGF10/PTPRC/WNT5A/PRRX1/SOX11	5	ALL_DEGs
GO:0070234	positive regulation of T cell apoptotic process	'3/212'	11/16001	0.272727	20.5845	7.52895	0.0003498	0.0155769	0.0140926	WNT5A/ZC3H8/PDCD1	3	ALL_DEGs
GO:0001936	regulation of endothelial cell proliferation	'8/212'	131/16001	0.0610687	4.60925	4.80634	0.00035713	0.0156659	0.0141731	FGF10/VASH1/WNT5A/CNMD/VASH2/EMC10/IGF2/NR2F2	8	ALL_DEGs
GO:0043010	camera-type eye development	'13/212'	323/16001	0.0402477	3.03775	4.28704	0.00038434	0.0166112	0.0150283	TFAP2B/SDK2/FGF10/LHX2/WNT5A/EFEMP1/RDH10/TWIST1/TFAP2A/COL8A1/MEGF11/SOX11/MAB21L2	13	ALL_DEGs
GO:0030330	DNA damage response, signal transduction by p53 class mediator	'6/212'	73/16001	0.0821918	6.20354	5.16334	0.00040984	0.0173758	0.0157201	CD44/ZMPSTE24/TWIST1/MDM2/PLK2/MSX1	6	ALL_DEGs
GO:0035116	embryonic hindlimb morphogenesis	'4/212'	27/16001	0.148148	11.1817	6.13544	0.00041385	0.0173758	0.0157201	PITX1/TBX4/TWIST1/MSX1	4	ALL_DEGs
GO:0050954	sensory perception of mechanical stimulus	'9/212'	170/16001	0.0529412	3.99581	4.55025	0.00044462	0.0184046	0.0166508	COL11A1/EPYC/MYH14/COL1A1/SIX1/P2RX4/TFAP2A/COL2A1/COL11A2	9	ALL_DEGs
GO:0003401	axis elongation	'4/212'	29/16001	0.137931	10.4105	5.87739	0.00054859	0.0223933	0.0202595	FGF10/WNT5A/RDH10/SIX1	4	ALL_DEGs
GO:0003007	heart morphogenesis	'11/212'	254/16001	0.0433071	3.26866	4.22317	0.0005889	0.0229925	0.0208016	COL11A1/ZMPSTE24/TBX5/WNT5A/TWIST1/SIX1/MDM2/COL2A1/TNNI1/MSX1/SOX11	11	ALL_DEGs
GO:0048934	peripheral nervous system neuron differentiation	'3/212'	13/16001	0.230769	17.4176	6.86176	0.00059457	0.0229925	0.0208016	HOXD9/HOXD10/TBCE	3	ALL_DEGs
GO:0048935	peripheral nervous system neuron development	'3/212'	13/16001	0.230769	17.4176	6.86176	0.00059457	0.0229925	0.0208016	HOXD9/HOXD10/TBCE	3	ALL_DEGs
GO:0061029	eyelid development in camera-type eye	'3/212'	13/16001	0.230769	17.4176	6.86176	0.00059457	0.0229925	0.0208016	TWIST1/TFAP2A/SOX11	3	ALL_DEGs
GO:0045778	positive regulation of ossification	'5/212'	53/16001	0.0943396	7.12042	5.1715	0.00066655	0.0254415	0.0230172	GPM6B/WNT5A/TFAP2A/SOX11/FZD9	5	ALL_DEGs
GO:0048839	inner ear development	'9/212'	181/16001	0.0497238	3.75297	4.31607	0.00069933	0.0263505	0.0238396	COL11A1/FGF10/TRIP11/WNT5A/PRRX1/SIX1/TFAP2A/COL2A1/MSX1	9	ALL_DEGs
GO:0016331	morphogenesis of embryonic epithelium	'8/212'	146/16001	0.0547945	4.13569	4.4104	0.00073477	0.0268579	0.0242986	FGF10/LHX2/WNT5A/RDH10/TWIST1/SIX1/TFAP2A/SOX11	8	ALL_DEGs
GO:0003413	chondrocyte differentiation involved in endochondral bone morphogenesis	'3/212'	14/16001	0.214286	16.1735	6.58139	0.00074935	0.0268579	0.0242986	TRIP11/MATN1/COL27A1	3	ALL_DEGs
GO:0070230	positive regulation of lymphocyte apoptotic process	'3/212'	14/16001	0.214286	16.1735	6.58139	0.00074935	0.0268579	0.0242986	WNT5A/ZC3H8/PDCD1	3	ALL_DEGs
GO:0071599	otic vesicle development	'3/212'	14/16001	0.214286	16.1735	6.58139	0.00074935	0.0268579	0.0242986	FGF10/SIX1/COL2A1	3	ALL_DEGs
GO:0007605	sensory perception of sound	'8/212'	147/16001	0.0544218	4.10756	4.38591	0.00076838	0.027208	0.0246154	COL11A1/EPYC/MYH14/COL1A1/SIX1/TFAP2A/COL2A1/COL11A2	8	ALL_DEGs
GO:0110110	positive regulation of animal organ morphogenesis	'4/212'	32/16001	0.125	9.43455	5.53412	0.00080521	0.0281639	0.0254802	HOXA11/FGF10/SIX1/MSX1	4	ALL_DEGs
GO:2000027	regulation of animal organ morphogenesis	'6/212'	83/16001	0.0722892	5.45613	4.71632	0.00081454	0.0281639	0.0254802	HOXA11/FGF10/WNT5A/SIX1/APCDD1/MSX1	6	ALL_DEGs
GO:0010634	positive regulation of epithelial cell migration	'8/212'	149/16001	0.0536913	4.05242	4.33757	0.00083931	0.0286831	0.0259499	HDAC9/FGF10/MAP4K4/WNT5A/P2RX4/BCAS3/PLK2/EMC10	8	ALL_DEGs
GO:0010632	regulation of epithelial cell migration	'10/212'	225/16001	0.0444444	3.35451	4.12139	0.0008536	0.028836	0.0260883	HDAC9/FGF10/MAP4K4/VASH1/WNT5A/P2RX4/BCAS3/PLK2/EMC10/NR2F2	10	ALL_DEGs
GO:0001656	metanephros development	'6/212'	84/16001	0.0714286	5.39117	4.67563	0.00086766	0.028978	0.0262167	HOXA11/TFAP2B/FGF10/RDH10/SIX1/BASP1	6	ALL_DEGs
GO:0010092	specification of animal organ identity	'4/212'	33/16001	0.121212	9.14866	5.42961	0.00090685	0.029632	0.0268084	HOXA11/FGF10/WNT5A/SIX1	4	ALL_DEGs
GO:0043518	negative regulation of DNA damage response, signal transduction by p53 class mediator	'3/212'	15/16001	0.2	15.0953	6.32849	0.00092757	0.029632	0.0268084	CD44/TWIST1/MDM2	3	ALL_DEGs
GO:0043584	nose development	'3/212'	15/16001	0.2	15.0953	6.32849	0.00092757	0.029632	0.0268084	RDH10/SIX1/MSX1	3	ALL_DEGs
GO:0060572	morphogenesis of an epithelial bud	'3/212'	15/16001	0.2	15.0953	6.32849	0.00092757	0.029632	0.0268084	FGF10/WNT5A/RDH10	3	ALL_DEGs
GO:0042733	embryonic digit morphogenesis	'5/212'	58/16001	0.0862069	6.50659	4.86813	0.0010089	0.0318035	0.028773	HOXA11/WNT5A/TWIST1/MSX1/HOXD12	5	ALL_DEGs
GO:0009954	proximal/distal pattern formation	'4/212'	34/16001	0.117647	8.87958	5.32944	0.00101719	0.0318035	0.028773	HOXA11/FGF10/HOXD9/HOXD10	4	ALL_DEGs
GO:0001942	hair follicle development	'6/212'	88/16001	0.0681818	5.14612	4.51916	0.00110734	0.0342575	0.0309932	FGF10/ZMPSTE24/LHX2/WNT5A/KRT17/APCDD1	6	ALL_DEGs
GO:0001654	eye development	'13/212'	367/16001	0.0354223	2.67355	3.75827	0.00125333	0.0383703	0.034714	TFAP2B/SDK2/FGF10/LHX2/WNT5A/EFEMP1/RDH10/TWIST1/TFAP2A/COL8A1/MEGF11/SOX11/MAB21L2	13	ALL_DEGs
GO:0022404	molting cycle process	'6/212'	91/16001	0.0659341	4.97647	4.40792	0.00131813	0.0390669	0.0353443	FGF10/ZMPSTE24/LHX2/WNT5A/KRT17/APCDD1	6	ALL_DEGs
GO:0022405	hair cycle process	'6/212'	91/16001	0.0659341	4.97647	4.40792	0.00131813	0.0390669	0.0353443	FGF10/ZMPSTE24/LHX2/WNT5A/KRT17/APCDD1	6	ALL_DEGs
GO:0071772	response to BMP	'8/212'	160/16001	0.05	3.77382	4.08599	0.00132926	0.0390669	0.0353443	TFAP2B/COMP/WNT5A/SMAD9/COL2A1/MSX1/FSTL5/SOX11	8	ALL_DEGs
GO:0071773	cellular response to BMP stimulus	'8/212'	160/16001	0.05	3.77382	4.08599	0.00132926	0.0390669	0.0353443	TFAP2B/COMP/WNT5A/SMAD9/COL2A1/MSX1/FSTL5/SOX11	8	ALL_DEGs
GO:0021783	preganglionic parasympathetic fiber development	'3/212'	17/16001	0.176471	13.3194	5.88872	0.00135944	0.0395584	0.0357889	SIX1/TFAP2A/PLXNA4	3	ALL_DEGs
GO:0150063	visual system development	'13/212'	371/16001	0.0350404	2.64473	3.71408	0.00138121	0.0397978	0.0360055	TFAP2B/SDK2/FGF10/LHX2/WNT5A/EFEMP1/RDH10/TWIST1/TFAP2A/COL8A1/MEGF11/SOX11/MAB21L2	13	ALL_DEGs
GO:0003205	cardiac chamber development	'8/212'	162/16001	0.0493827	3.72723	4.04265	0.00143881	0.0410551	0.037143	COL11A1/ZMPSTE24/TBX5/TRIP11/WNT5A/MDM2/TNNI1/SOX11	8	ALL_DEGs
GO:0060993	kidney morphogenesis	'6/212'	93/16001	0.0645161	4.86945	4.33644	0.00147481	0.0416776	0.0377062	HOXA11/FGF10/ZMPSTE24/SIX1/HOXD11/BASP1	6	ALL_DEGs
GO:0010594	regulation of endothelial cell migration	'8/212'	164/16001	0.0487805	3.68178	3.99999	0.00155543	0.0431467	0.0390354	HDAC9/VASH1/WNT5A/P2RX4/BCAS3/PLK2/EMC10/NR2F2	8	ALL_DEGs
GO:0048880	sensory system development	'13/212'	376/16001	0.0345745	2.60956	3.65966	0.00155616	0.0431467	0.0390354	TFAP2B/SDK2/FGF10/LHX2/WNT5A/EFEMP1/RDH10/TWIST1/TFAP2A/COL8A1/MEGF11/SOX11/MAB21L2	13	ALL_DEGs
GO:0035137	hindlimb morphogenesis	'4/61'	35/16001	0.114286	29.9785	10.6168	9.16e-06	0.0111123	0.0101735	PITX1/TBX4/HOXD9/HOXD10	4	Cluster_0
GO:0030326	embryonic limb morphogenesis	'5/61'	121/16001	0.0413223	10.8393	6.72068	9.65e-05	0.0390301	0.0357329	PITX1/TBX5/TBX4/HOXD9/HOXD10	5	Cluster_0
GO:0035113	embryonic appendage morphogenesis	'5/61'	121/16001	0.0413223	10.8393	6.72068	9.65e-05	0.0390301	0.0357329	PITX1/TBX5/TBX4/HOXD9/HOXD10	5	Cluster_0
GO:0035107	appendage morphogenesis	'10/81'	149/16001	0.0671141	13.2579	10.7226	3.86e-09	3.61e-06	2.99e-06	HOXA11/TFAP2B/FGF10/WNT5A/PRRX1/RDH10/TWIST1/TFAP2A/MSX1/HOXD12	10	Cluster_1
GO:0035108	limb morphogenesis	'10/81'	149/16001	0.0671141	13.2579	10.7226	3.86e-09	3.61e-06	2.99e-06	HOXA11/TFAP2B/FGF10/WNT5A/PRRX1/RDH10/TWIST1/TFAP2A/MSX1/HOXD12	10	Cluster_1
GO:0048706	embryonic skeletal system development	'9/81'	125/16001	0.072	14.2231	10.5864	1.32e-08	8.2e-06	6.8e-06	HOXA11/COL1A1/WNT5A/PRRX1/SATB2/RDH10/TWIST1/TFAP2A/SOX11	9	Cluster_1
GO:0031076	embryonic camera-type eye development	'6/81'	36/16001	0.166667	32.9239	13.6777	2.41e-08	9.13e-06	7.58e-06	FGF10/WNT5A/RDH10/TWIST1/TFAP2A/SOX11	6	Cluster_1
GO:0048736	appendage development	'10/81'	184/16001	0.0543478	10.736	9.47459	2.93e-08	9.13e-06	7.58e-06	HOXA11/TFAP2B/FGF10/WNT5A/PRRX1/RDH10/TWIST1/TFAP2A/MSX1/HOXD12	10	Cluster_1
GO:0060173	limb development	'10/81'	184/16001	0.0543478	10.736	9.47459	2.93e-08	9.13e-06	7.58e-06	HOXA11/TFAP2B/FGF10/WNT5A/PRRX1/RDH10/TWIST1/TFAP2A/MSX1/HOXD12	10	Cluster_1
GO:0035136	forelimb morphogenesis	'6/81'	41/16001	0.146341	28.9088	12.7628	5.44e-08	1.45e-05	1.2e-05	HOXA11/TFAP2B/RDH10/TWIST1/TFAP2A/MSX1	6	Cluster_1
GO:0060900	embryonic camera-type eye formation	'4/81'	10/16001	0.4	79.0173	17.6029	1.25e-07	2.92e-05	2.42e-05	WNT5A/TWIST1/TFAP2A/SOX11	4	Cluster_1
GO:0030326	embryonic limb morphogenesis	'8/81'	121/16001	0.0661157	13.0607	9.49885	1.72e-07	3.21e-05	2.66e-05	HOXA11/WNT5A/PRRX1/RDH10/TWIST1/TFAP2A/MSX1/HOXD12	8	Cluster_1
GO:0035113	embryonic appendage morphogenesis	'8/81'	121/16001	0.0661157	13.0607	9.49885	1.72e-07	3.21e-05	2.66e-05	HOXA11/WNT5A/PRRX1/RDH10/TWIST1/TFAP2A/MSX1/HOXD12	8	Cluster_1
GO:0048568	embryonic organ development	'13/81'	434/16001	0.0299539	5.91719	7.40782	2.52e-07	4.28e-05	3.56e-05	HOXA11/FGF10/WNT5A/PRRX1/SATB2/RDH10/TWIST1/TFAP2A/VASH2/MSX1/SOX11/NR2F2/PLXNA4	13	Cluster_1
GO:0060021	roof of mouth development	'7/81'	89/16001	0.0786517	15.5371	9.80938	3.23e-07	5.02e-05	4.17e-05	WNT5A/PRRX1/SATB2/TWIST1/TFAP2A/MSX1/SOX11	7	Cluster_1
GO:0048704	embryonic skeletal system morphogenesis	'7/81'	91/16001	0.0769231	15.1956	9.6866	3.76e-07	5.4e-05	4.48e-05	HOXA11/PRRX1/SATB2/RDH10/TWIST1/TFAP2A/SOX11	7	Cluster_1
GO:0035115	embryonic forelimb morphogenesis	'5/81'	33/16001	0.151515	29.9308	11.8665	6.23e-07	8.31e-05	6.9e-05	HOXA11/RDH10/TWIST1/TFAP2A/MSX1	5	Cluster_1
GO:0048562	embryonic organ morphogenesis	'10/81'	283/16001	0.0353357	6.98033	7.2402	1.59e-06	0.00019756	0.00016396	HOXA11/FGF10/WNT5A/PRRX1/SATB2/RDH10/TWIST1/TFAP2A/MSX1/SOX11	10	Cluster_1
GO:0048705	skeletal system morphogenesis	'9/81'	221/16001	0.040724	8.04475	7.5221	1.71e-06	0.00019982	0.00016583	HOXA11/COL1A1/PRRX1/SATB2/RDH10/TWIST1/TFAP2A/MSX1/SOX11	9	Cluster_1
GO:0048596	embryonic camera-type eye morphogenesis	'4/81'	25/16001	0.16	31.6069	10.9241	7.11e-06	0.00078074	0.00064796	WNT5A/TWIST1/TFAP2A/SOX11	4	Cluster_1
GO:0016331	morphogenesis of embryonic epithelium	'7/81'	146/16001	0.0479452	9.47125	7.33452	9.02e-06	0.00093543	0.00077634	FGF10/LHX2/WNT5A/RDH10/TWIST1/TFAP2A/SOX11	7	Cluster_1
GO:0042733	embryonic digit morphogenesis	'5/81'	58/16001	0.0862069	17.0296	8.72333	1.09e-05	0.00107056	0.00088849	HOXA11/WNT5A/TWIST1/MSX1/HOXD12	5	Cluster_1
GO:0048048	embryonic eye morphogenesis	'4/81'	34/16001	0.117647	23.2404	9.25979	2.52e-05	0.00235013	0.00195044	WNT5A/TWIST1/TFAP2A/SOX11	4	Cluster_1
GO:0042471	ear morphogenesis	'6/81'	118/16001	0.0508475	10.0446	7.03386	2.93e-05	0.0026025	0.00215989	FGF10/WNT5A/PRRX1/TWIST1/TFAP2A/MSX1	6	Cluster_1
GO:0061029	eyelid development in camera-type eye	'3/81'	13/16001	0.230769	45.5869	11.4713	3.45e-05	0.00292438	0.00242702	TWIST1/TFAP2A/SOX11	3	Cluster_1
GO:0042476	odontogenesis	'6/81'	124/16001	0.0483871	9.55854	6.82429	3.87e-05	0.00314357	0.00260893	FGF10/COL1A1/TFAP2A/APCDD1/MSX1/COL1A2	6	Cluster_1
GO:0001503	ossification	'10/81'	415/16001	0.0240964	4.76008	5.53585	4.49e-05	0.00349316	0.00289907	IBSP/COL1A1/WNT5A/SATB2/TWIST1/TFAP2A/CDH11/IGSF10/COL1A2/SOX11	10	Cluster_1
GO:0060572	morphogenesis of an epithelial bud	'3/81'	15/16001	0.2	39.5086	10.643	5.44e-05	0.00392429	0.00325688	FGF10/WNT5A/RDH10	3	Cluster_1
GO:0090596	sensory organ morphogenesis	'8/81'	263/16001	0.0304183	6.00892	5.84222	5.47e-05	0.00392429	0.00325688	TFAP2B/FGF10/WNT5A/PRRX1/TWIST1/TFAP2A/MSX1/SOX11	8	Cluster_1
GO:2000027	regulation of animal organ morphogenesis	'5/81'	83/16001	0.060241	11.9002	7.10166	6.25e-05	0.00412226	0.00342118	HOXA11/FGF10/WNT5A/APCDD1/MSX1	5	Cluster_1
GO:0043588	skin development	'8/81'	269/16001	0.0297398	5.87489	5.75149	6.4e-05	0.00412226	0.00342118	TFAP2B/FGF10/LHX2/COL1A1/WNT5A/KRT17/APCDD1/COL1A2	8	Cluster_1
GO:0048701	embryonic cranial skeleton morphogenesis	'4/81'	43/16001	0.0930233	18.3761	8.1382	6.47e-05	0.00412226	0.00342118	PRRX1/RDH10/TWIST1/TFAP2A	4	Cluster_1
GO:0001656	metanephros development	'5/81'	84/16001	0.0595238	11.7585	7.05168	6.62e-05	0.00412226	0.00342118	HOXA11/TFAP2B/FGF10/RDH10/BASP1	5	Cluster_1
GO:0048483	autonomic nervous system development	'4/81'	44/16001	0.0909091	17.9585	8.03468	7.09e-05	0.0042709	0.00354453	TFAP2B/TFAP2A/SOX11/PLXNA4	4	Cluster_1
GO:0051216	cartilage development	'7/81'	204/16001	0.0343137	6.77844	5.92474	7.73e-05	0.00438473	0.00363901	HOXA11/CD44/COL1A1/WNT5A/PRRX1/SATB2/MSX1	7	Cluster_1
GO:0007389	pattern specification process	'10/81'	443/16001	0.0225734	4.45921	5.26664	7.75e-05	0.00438473	0.00363901	HOXA11/FGF10/LHX2/WNT5A/SATB2/SHROOM3/MSX1/HOXD12/BASP1/NR2F2	10	Cluster_1
GO:0001942	hair follicle development	'5/81'	88/16001	0.0568182	11.224	6.85992	8.27e-05	0.00451247	0.00374502	FGF10/LHX2/WNT5A/KRT17/APCDD1	5	Cluster_1
GO:2000648	positive regulation of stem cell proliferation	'4/81'	46/16001	0.0869565	17.1777	7.8375	8.46e-05	0.00451247	0.00374502	FGF10/WNT5A/PRRX1/SOX11	4	Cluster_1
GO:0043583	ear development	'7/81'	208/16001	0.0336538	6.64809	5.84833	8.73e-05	0.00452996	0.00375954	FGF10/WNT5A/PRRX1/RDH10/TWIST1/TFAP2A/MSX1	7	Cluster_1
GO:0022404	molting cycle process	'5/81'	91/16001	0.0549451	10.854	6.72404	9.71e-05	0.00476877	0.00395773	FGF10/LHX2/WNT5A/KRT17/APCDD1	5	Cluster_1
GO:0022405	hair cycle process	'5/81'	91/16001	0.0549451	10.854	6.72404	9.71e-05	0.00476877	0.00395773	FGF10/LHX2/WNT5A/KRT17/APCDD1	5	Cluster_1
GO:0010634	positive regulation of epithelial cell migration	'6/81'	149/16001	0.0402685	7.95476	6.08365	0.00010768	0.00515476	0.00427808	HDAC9/FGF10/MAP4K4/WNT5A/BCAS3/PLK2	6	Cluster_1
GO:0060602	branch elongation of an epithelium	'3/81'	19/16001	0.157895	31.191	9.39226	0.00011422	0.00533128	0.00442458	FGF10/WNT5A/RDH10	3	Cluster_1
GO:0060349	bone morphogenesis	'5/81'	97/16001	0.0515464	10.1826	6.4704	0.00013136	0.00598178	0.00496444	HOXA11/COL1A1/TWIST1/TFAP2A/MSX1	5	Cluster_1
GO:0010632	regulation of epithelial cell migration	'7/81'	225/16001	0.0311111	6.14579	5.54467	0.00014243	0.00633155	0.00525472	HDAC9/FGF10/MAP4K4/WNT5A/BCAS3/PLK2/NR2F2	7	Cluster_1
GO:0002009	morphogenesis of an epithelium	'10/81'	481/16001	0.02079	4.10693	4.93502	0.0001524	0.00660382	0.00548069	HOXA11/CD44/FGF10/LHX2/WNT5A/RDH10/TWIST1/KRT17/TFAP2A/SOX11	10	Cluster_1
GO:0048485	sympathetic nervous system development	'3/81'	21/16001	0.142857	28.2205	8.90323	0.00015563	0.00660382	0.00548069	TFAP2B/SOX11/PLXNA4	3	Cluster_1
GO:0001822	kidney development	'8/81'	307/16001	0.0260586	5.14771	5.23409	0.00016	0.00663842	0.0055094	HOXA11/TFAP2B/FGF10/WNT5A/RDH10/TFAP2A/BASP1/SOX11	8	Cluster_1
GO:0072001	renal system development	'8/81'	317/16001	0.0252366	4.98532	5.11205	0.00019912	0.00791948	0.00657259	HOXA11/TFAP2B/FGF10/WNT5A/RDH10/TFAP2A/BASP1/SOX11	8	Cluster_1
GO:0030510	regulation of BMP signaling pathway	'5/81'	106/16001	0.0471698	9.31808	6.12882	0.00019937	0.00791948	0.00657259	TFAP2B/WNT5A/MSX1/FSTL5/SOX11	5	Cluster_1
GO:0042303	molting cycle	'5/81'	107/16001	0.046729	9.23099	6.09338	0.00020832	0.00793726	0.00658734	FGF10/LHX2/WNT5A/KRT17/APCDD1	5	Cluster_1
GO:0042633	hair cycle	'5/81'	107/16001	0.046729	9.23099	6.09338	0.00020832	0.00793726	0.00658734	FGF10/LHX2/WNT5A/KRT17/APCDD1	5	Cluster_1
GO:0043010	camera-type eye development	'8/81'	323/16001	0.0247678	4.89271	5.04126	0.00022615	0.00844462	0.00700842	TFAP2B/FGF10/LHX2/WNT5A/RDH10/TWIST1/TFAP2A/SOX11	8	Cluster_1
GO:0060571	morphogenesis of an epithelial fold	'3/81'	24/16001	0.125	24.6929	8.28528	0.00023427	0.00857594	0.0071174	FGF10/WNT5A/RDH10	3	Cluster_1
GO:0003156	regulation of animal organ formation	'3/81'	25/16001	0.12	23.7052	8.10386	0.00026524	0.00952317	0.00790353	HOXA11/FGF10/WNT5A	3	Cluster_1
GO:0048645	animal organ formation	'4/81'	63/16001	0.0634921	12.5424	6.54759	0.00028929	0.0101907	0.00845756	HOXA11/FGF10/WNT5A/RDH10	4	Cluster_1
GO:0007548	sex differentiation	'7/81'	258/16001	0.0271318	5.3597	5.03563	0.00032888	0.0113708	0.00943692	HOXA11/FGF10/WNT5A/RDH10/LHX9/BASP1/NR2F2	7	Cluster_1
GO:0009880	embryonic pattern specification	'4/81'	66/16001	0.0606061	11.9723	6.37126	0.00034603	0.011746	0.00974834	FGF10/WNT5A/SATB2/BASP1	4	Cluster_1
GO:1904888	cranial skeletal system development	'4/81'	68/16001	0.0588235	11.6202	6.25992	0.00038801	0.012936	0.010736	PRRX1/RDH10/TWIST1/TFAP2A	4	Cluster_1
GO:0098773	skin epidermis development	'5/81'	123/16001	0.0406504	8.03021	5.58283	0.00039754	0.0130213	0.0108068	FGF10/LHX2/WNT5A/KRT17/APCDD1	5	Cluster_1
GO:0003401	axis elongation	'3/81'	29/16001	0.103448	20.4355	7.47216	0.00041529	0.0133679	0.0110944	FGF10/WNT5A/RDH10	3	Cluster_1
GO:0048593	camera-type eye morphogenesis	'5/81'	128/16001	0.0390625	7.71653	5.44191	0.00047729	0.0151033	0.0125346	TFAP2B/WNT5A/TWIST1/TFAP2A/SOX11	5	Cluster_1
GO:0030330	DNA damage response, signal transduction by p53 class mediator	'4/81'	73/16001	0.0547945	10.8243	6.00085	0.00050875	0.0157355	0.0130593	CD44/TWIST1/PLK2/MSX1	4	Cluster_1
GO:0048608	reproductive structure development	'7/81'	279/16001	0.0250896	4.95628	4.75517	0.00052578	0.0157355	0.0130593	HOXA11/FGF10/WNT5A/RDH10/LHX9/BASP1/NR2F2	7	Cluster_1
GO:0061448	connective tissue development	'7/81'	279/16001	0.0250896	4.95628	4.75517	0.00052578	0.0157355	0.0130593	HOXA11/CD44/COL1A1/WNT5A/PRRX1/SATB2/MSX1	7	Cluster_1
GO:0001654	eye development	'8/81'	367/16001	0.0217984	4.30612	4.57033	0.00053098	0.0157355	0.0130593	TFAP2B/FGF10/LHX2/WNT5A/RDH10/TWIST1/TFAP2A/SOX11	8	Cluster_1
GO:0110110	positive regulation of animal organ morphogenesis	'3/81'	32/16001	0.09375	18.5197	7.07609	0.00055759	0.016186	0.0134332	HOXA11/FGF10/MSX1	3	Cluster_1
GO:0150063	visual system development	'8/81'	371/16001	0.0215633	4.25969	4.53122	0.00057023	0.016186	0.0134332	TFAP2B/FGF10/LHX2/WNT5A/RDH10/TWIST1/TFAP2A/SOX11	8	Cluster_1
GO:0061458	reproductive system development	'7/81'	283/16001	0.024735	4.88623	4.70494	0.00057219	0.016186	0.0134332	HOXA11/FGF10/WNT5A/RDH10/LHX9/BASP1/NR2F2	7	Cluster_1
GO:0010092	specification of animal organ identity	'3/81'	33/16001	0.0909091	17.9585	6.95584	0.00061112	0.0170291	0.0141329	HOXA11/FGF10/WNT5A	3	Cluster_1
GO:0048880	sensory system development	'8/81'	376/16001	0.0212766	4.20305	4.4831	0.00062256	0.017093	0.014186	TFAP2B/FGF10/LHX2/WNT5A/RDH10/TWIST1/TFAP2A/SOX11	8	Cluster_1
GO:0008406	gonad development	'6/81'	208/16001	0.0288462	5.69836	4.86493	0.00064793	0.0175316	0.0145499	HOXA11/WNT5A/RDH10/LHX9/BASP1/NR2F2	6	Cluster_1
GO:0060541	respiratory system development	'6/81'	211/16001	0.028436	5.61734	4.81585	0.00069837	0.0186266	0.0154587	FGF10/WNT5A/RDH10/MSX1/BASP1/SOX11	6	Cluster_1
GO:0035137	hindlimb morphogenesis	'3/81'	35/16001	0.0857143	16.9323	6.73046	0.00072777	0.0190242	0.0157887	TFAP2B/TWIST1/MSX1	3	Cluster_1
GO:0045137	development of primary sexual characteristics	'6/81'	213/16001	0.028169	5.5646	4.78365	0.00073366	0.0190242	0.0157887	HOXA11/WNT5A/RDH10/LHX9/BASP1/NR2F2	6	Cluster_1
GO:0072091	regulation of stem cell proliferation	'4/81'	81/16001	0.0493827	9.75522	5.63468	0.00075421	0.0192893	0.0160087	FGF10/WNT5A/PRRX1/SOX11	4	Cluster_1
GO:0060485	mesenchyme development	'7/81'	299/16001	0.0234114	4.62476	4.51303	0.00079148	0.0199687	0.0165726	FGF10/COL1A1/WNT5A/RDH10/TWIST1/MSX1/BASP1	7	Cluster_1
GO:0010631	epithelial cell migration	'7/81'	301/16001	0.0232558	4.59403	4.49	0.00082301	0.0204875	0.0170032	HDAC9/FGF10/MAP4K4/WNT5A/BCAS3/PLK2/NR2F2	7	Cluster_1
GO:0090132	epithelium migration	'7/81'	303/16001	0.0231023	4.5637	4.46716	0.00085554	0.0210169	0.0174425	HDAC9/FGF10/MAP4K4/WNT5A/BCAS3/PLK2/NR2F2	7	Cluster_1
GO:0043516	regulation of DNA damage response, signal transduction by p53 class mediator	'3/81'	38/16001	0.0789474	15.5955	6.42518	0.00092786	0.0224975	0.0186713	CD44/TWIST1/MSX1	3	Cluster_1
GO:0090130	tissue migration	'7/81'	308/16001	0.0227273	4.48962	4.41094	0.0009413	0.022531	0.0186991	HDAC9/FGF10/MAP4K4/WNT5A/BCAS3/PLK2/NR2F2	7	Cluster_1
GO:0030509	BMP signaling pathway	'5/81'	151/16001	0.0331126	6.54117	4.87984	0.0010084	0.0238313	0.0197783	TFAP2B/WNT5A/MSX1/FSTL5/SOX11	5	Cluster_1
GO:0060537	muscle tissue development	'8/81'	407/16001	0.019656	3.88291	4.20224	0.00104059	0.0242847	0.0201546	CACNA1G/TFAP2B/HDAC9/WNT5A/TWIST1/MSX1/SOX11/NR2F2	8	Cluster_1
GO:0060606	tube closure	'4/81'	89/16001	0.0449438	8.87835	5.31617	0.00107352	0.0247439	0.0205356	FGF10/LHX2/WNT5A/TWIST1	4	Cluster_1
GO:0021559	trigeminal nerve development	'2/81'	10/16001	0.2	39.5086	8.68863	0.00110938	0.0252586	0.0209628	TFAP2A/PLXNA4	2	Cluster_1
GO:0048592	eye morphogenesis	'5/81'	155/16001	0.0322581	6.37236	4.79405	0.00113329	0.0254922	0.0211566	TFAP2B/WNT5A/TWIST1/TFAP2A/SOX11	5	Cluster_1
GO:0001667	ameboidal-type cell migration	'8/81'	420/16001	0.0190476	3.76273	4.09257	0.00127217	0.0281882	0.0233941	HDAC9/FGF10/MAP4K4/WNT5A/TWIST1/BCAS3/PLK2/NR2F2	8	Cluster_1
GO:0071772	response to BMP	'5/81'	160/16001	0.03125	6.17323	4.69095	0.00130512	0.0281882	0.0233941	TFAP2B/WNT5A/MSX1/FSTL5/SOX11	5	Cluster_1
GO:0071773	cellular response to BMP stimulus	'5/81'	160/16001	0.03125	6.17323	4.69095	0.00130512	0.0281882	0.0233941	TFAP2B/WNT5A/MSX1/FSTL5/SOX11	5	Cluster_1
GO:0030656	regulation of vitamin metabolic process	'2/81'	11/16001	0.181818	35.9169	8.26303	0.00135145	0.0281882	0.0233941	RDH10/CLYBL	2	Cluster_1
GO:0051798	positive regulation of hair follicle development	'2/81'	11/16001	0.181818	35.9169	8.26303	0.00135145	0.0281882	0.0233941	WNT5A/KRT17	2	Cluster_1
GO:0060601	lateral sprouting from an epithelium	'2/81'	11/16001	0.181818	35.9169	8.26303	0.00135145	0.0281882	0.0233941	FGF10/WNT5A	2	Cluster_1
GO:0048762	mesenchymal cell differentiation	'6/81'	240/16001	0.025	4.93858	4.38515	0.00135883	0.0281882	0.0233941	FGF10/COL1A1/WNT5A/RDH10/TWIST1/MSX1	6	Cluster_1
GO:0010594	regulation of endothelial cell migration	'5/81'	164/16001	0.0304878	6.02266	4.61158	0.00145589	0.0298697	0.0247897	HDAC9/WNT5A/BCAS3/PLK2/NR2F2	5	Cluster_1
GO:0042472	inner ear morphogenesis	'4/81'	97/16001	0.0412371	8.14611	5.03539	0.00147757	0.0299849	0.0248853	FGF10/WNT5A/PRRX1/TFAP2A	4	Cluster_1
GO:0010463	mesenchymal cell proliferation	'3/81'	45/16001	0.0666667	13.1695	5.83109	0.00152151	0.0305447	0.0253499	WNT5A/PRRX1/MSX1	3	Cluster_1
GO:0141091	transforming growth factor beta receptor superfamily signaling pathway	'7/81'	336/16001	0.0208333	4.11548	4.11681	0.00155496	0.0305841	0.0253826	TFAP2B/FGF10/WNT5A/MSX1/COL1A2/FSTL5/SOX11	7	Cluster_1
GO:0045165	cell fate commitment	'6/81'	247/16001	0.0242915	4.79862	4.29151	0.00157302	0.0305841	0.0253826	HOXA11/FGF10/WNT5A/PRRX1/CHD3/NR2F2	6	Cluster_1
GO:0043589	skin morphogenesis	'2/81'	12/16001	0.166667	32.9239	7.8909	0.00161642	0.0305841	0.0253826	COL1A1/COL1A2	2	Cluster_1
GO:0051549	positive regulation of keratinocyte migration	'2/81'	12/16001	0.166667	32.9239	7.8909	0.00161642	0.0305841	0.0253826	FGF10/MAP4K4	2	Cluster_1
GO:0031214	biomineral tissue development	'5/81'	168/16001	0.0297619	5.87926	4.5348	0.00161913	0.0305841	0.0253826	IBSP/COL1A1/TWIST1/TFAP2A/COL1A2	5	Cluster_1
GO:0048546	digestive tract morphogenesis	'3/81'	46/16001	0.0652174	12.8833	5.75701	0.00162176	0.0305841	0.0253826	FGF10/WNT5A/SOX11	3	Cluster_1
GO:0007517	muscle organ development	'7/81'	341/16001	0.0205279	4.05514	4.06765	0.00169152	0.0315807	0.0262097	HDAC9/WNT5A/TWIST1/MSX1/BASP1/SOX11/NR2F2	7	Cluster_1
GO:0044344	cellular response to fibroblast growth factor stimulus	'4/81'	101/16001	0.039604	7.82349	4.90682	0.00171477	0.0316978	0.0263069	CD44/FGF10/COL1A1/WNT5A	4	Cluster_1
GO:0072331	signal transduction by p53 class mediator	'5/81'	171/16001	0.0292398	5.77612	4.47882	0.00175013	0.0320342	0.026586	PDK2/CD44/TWIST1/PLK2/MSX1	5	Cluster_1
GO:0030850	prostate gland development	'3/81'	48/16001	0.0625	12.3465	5.61553	0.00183445	0.0332516	0.0275964	HOXA11/FGF10/WNT5A	3	Cluster_1
GO:0010595	positive regulation of endothelial cell migration	'4/81'	104/16001	0.0384615	7.59782	4.81493	0.00190918	0.0342735	0.0284445	HDAC9/WNT5A/BCAS3/PLK2	4	Cluster_1
GO:0060538	skeletal muscle organ development	'5/81'	177/16001	0.0282486	5.58032	4.37074	0.00203524	0.0361886	0.0300339	HDAC9/TWIST1/BASP1/SOX11/NR2F2	5	Cluster_1
GO:0090092	regulation of transmembrane receptor protein serine/threonine kinase signaling pathway	'6/81'	262/16001	0.0229008	4.52389	4.10219	0.00211797	0.0373042	0.0309598	TFAP2B/FGF10/WNT5A/MSX1/FSTL5/SOX11	6	Cluster_1
GO:0060425	lung morphogenesis	'3/81'	51/16001	0.0588235	11.6202	5.41836	0.00218482	0.037395	0.0310351	FGF10/RDH10/SOX11	3	Cluster_1
GO:0007351	tripartite regional subdivision	'2/81'	14/16001	0.142857	28.2205	7.26787	0.00221411	0.037395	0.0310351	WNT5A/BASP1	2	Cluster_1
GO:0008595	anterior/posterior axis specification, embryo	'2/81'	14/16001	0.142857	28.2205	7.26787	0.00221411	0.037395	0.0310351	WNT5A/BASP1	2	Cluster_1
GO:0051547	regulation of keratinocyte migration	'2/81'	14/16001	0.142857	28.2205	7.26787	0.00221411	0.037395	0.0310351	FGF10/MAP4K4	2	Cluster_1
GO:0007178	transmembrane receptor protein serine/threonine kinase signaling pathway	'7/81'	358/16001	0.0195531	3.86258	3.90724	0.00222701	0.037395	0.0310351	TFAP2B/FGF10/WNT5A/MSX1/COL1A2/FSTL5/SOX11	7	Cluster_1
GO:0048839	inner ear development	'5/81'	181/16001	0.0276243	5.45699	4.30139	0.0022433	0.037395	0.0310351	FGF10/WNT5A/PRRX1/TFAP2A/MSX1	5	Cluster_1
GO:0071774	response to fibroblast growth factor	'4/81'	109/16001	0.0366973	7.24929	4.66967	0.00226631	0.0374442	0.0310759	CD44/FGF10/COL1A1/WNT5A	4	Cluster_1
GO:0060324	face development	'3/81'	52/16001	0.0576923	11.3967	5.35627	0.00231019	0.0378345	0.0313998	COL1A1/WNT5A/MSX1	3	Cluster_1
GO:0072089	stem cell proliferation	'4/81'	111/16001	0.036036	7.11867	4.61411	0.00242123	0.0392704	0.0325915	FGF10/WNT5A/PRRX1/SOX11	4	Cluster_1
GO:0045778	positive regulation of ossification	'3/81'	53/16001	0.0566038	11.1817	5.29585	0.00243994	0.0392704	0.0325915	WNT5A/TFAP2A/SOX11	3	Cluster_1
GO:0003188	heart valve formation	'2/81'	15/16001	0.133333	26.3391	7.00322	0.00254637	0.0399503	0.0331558	TWIST1/CDH11	2	Cluster_1
GO:0043518	negative regulation of DNA damage response, signal transduction by p53 class mediator	'2/81'	15/16001	0.133333	26.3391	7.00322	0.00254637	0.0399503	0.0331558	CD44/TWIST1	2	Cluster_1
GO:0043584	nose development	'2/81'	15/16001	0.133333	26.3391	7.00322	0.00254637	0.0399503	0.0331558	RDH10/MSX1	2	Cluster_1
GO:0046660	female sex differentiation	'4/81'	114/16001	0.0350877	6.93134	4.53331	0.00266705	0.0414949	0.0344377	FGF10/WNT5A/LHX9/NR2F2	4	Cluster_1
GO:0072132	mesenchyme morphogenesis	'3/81'	55/16001	0.0545455	10.7751	5.17973	0.00271276	0.0418573	0.0347385	WNT5A/TWIST1/MSX1	3	Cluster_1
GO:0050679	positive regulation of epithelial cell proliferation	'5/81'	190/16001	0.0263158	5.19851	4.15263	0.00276764	0.042354	0.0351508	FGF10/WNT5A/TWIST1/VASH2/SOX11	5	Cluster_1
GO:0048532	anatomical structure arrangement	'2/81'	16/16001	0.125	24.6929	6.76321	0.00290061	0.0433235	0.0359553	TFAP2A/PLXNA4	2	Cluster_1
GO:0048557	embryonic digestive tract morphogenesis	'2/81'	16/16001	0.125	24.6929	6.76321	0.00290061	0.0433235	0.0359553	FGF10/SOX11	2	Cluster_1
GO:0070206	protein trimerization	'2/81'	16/16001	0.125	24.6929	6.76321	0.00290061	0.0433235	0.0359553	CLYBL/COL1A2	2	Cluster_1
GO:0030278	regulation of ossification	'4/81'	117/16001	0.034188	6.75361	4.45538	0.0029295	0.0434077	0.0360252	WNT5A/TWIST1/TFAP2A/SOX11	4	Cluster_1
GO:0021783	preganglionic parasympathetic fiber development	'2/81'	17/16001	0.117647	23.2404	6.54417	0.00327659	0.0463439	0.038462	TFAP2A/PLXNA4	2	Cluster_1
GO:0030540	female genitalia development	'2/81'	17/16001	0.117647	23.2404	6.54417	0.00327659	0.0463439	0.038462	FGF10/WNT5A	2	Cluster_1
GO:0042481	regulation of odontogenesis	'2/81'	17/16001	0.117647	23.2404	6.54417	0.00327659	0.0463439	0.038462	APCDD1/MSX1	2	Cluster_1
GO:0043455	regulation of secondary metabolic process	'2/81'	17/16001	0.117647	23.2404	6.54417	0.00327659	0.0463439	0.038462	WNT5A/SLC24A5	2	Cluster_1
GO:0048021	regulation of melanin biosynthetic process	'2/81'	17/16001	0.117647	23.2404	6.54417	0.00327659	0.0463439	0.038462	WNT5A/SLC24A5	2	Cluster_1
GO:1900376	regulation of secondary metabolite biosynthetic process	'2/81'	17/16001	0.117647	23.2404	6.54417	0.00327659	0.0463439	0.038462	WNT5A/SLC24A5	2	Cluster_1
GO:0045732	positive regulation of protein catabolic process	'5/81'	199/16001	0.0251256	4.9634	4.013	0.00337568	0.0473865	0.0393273	NUB1/BAG2/WNT5A/NKD2/PLK2	5	Cluster_1
GO:0030282	bone mineralization	'4/81'	123/16001	0.0325203	6.42417	4.30744	0.00350641	0.0488161	0.0405138	IBSP/TWIST1/TFAP2A/COL1A2	4	Cluster_1
GO:0061564	axon development	'8/81'	495/16001	0.0161616	3.19262	3.53465	0.00352982	0.0488161	0.0405138	LHX2/UNC5B/WNT5A/CDH11/LHX9/VASH2/PLXNA4/TBCE	8	Cluster_1
GO:0009952	anterior/posterior pattern specification	'5/81'	202/16001	0.0247525	4.88968	3.96831	0.00359821	0.0493492	0.0409562	HOXA11/WNT5A/MSX1/BASP1/NR2F2	5	Cluster_1
GO:0045836	positive regulation of meiotic nuclear division	'2/81'	18/16001	0.111111	21.9492	6.34317	0.0036741	0.0493492	0.0409562	WNT5A/MSX1	2	Cluster_1
GO:0051797	regulation of hair follicle development	'2/81'	18/16001	0.111111	21.9492	6.34317	0.0036741	0.0493492	0.0409562	WNT5A/KRT17	2	Cluster_1
GO:1904666	regulation of ubiquitin protein ligase activity	'2/81'	18/16001	0.111111	21.9492	6.34317	0.0036741	0.0493492	0.0409562	BAG2/SKP1	2	Cluster_1
GO:0051216	cartilage development	'14/70'	204/16001	0.0686275	15.6873	13.9945	1.98e-13	2.6e-10	2.49e-10	COL11A1/FGFR3/EPYC/ZMPSTE24/TRIP11/COMP/EFEMP1/MATN3/CNMD/COL2A1/MATN1/SNORC/COL27A1/COL11A2	14	Cluster_2
GO:0061448	connective tissue development	'14/70'	279/16001	0.0501792	11.4703	11.6948	1.4e-11	9.19e-09	8.81e-09	COL11A1/FGFR3/EPYC/ZMPSTE24/TRIP11/COMP/EFEMP1/MATN3/CNMD/COL2A1/MATN1/SNORC/COL27A1/COL11A2	14	Cluster_2
GO:0030198	extracellular matrix organization	'13/70'	310/16001	0.0419355	9.58585	10.1187	7.43e-10	2.11e-07	2.02e-07	COL9A2/COL11A1/COL9A3/COMP/COL9A1/MATN3/COL2A1/COL8A1/MATN1/COL27A1/COL11A2/COL15A1/ZNF469	13	Cluster_2
GO:0043062	extracellular structure organization	'13/70'	311/16001	0.0418006	9.55503	10.099	7.73e-10	2.11e-07	2.02e-07	COL9A2/COL11A1/COL9A3/COMP/COL9A1/MATN3/COL2A1/COL8A1/MATN1/COL27A1/COL11A2/COL15A1/ZNF469	13	Cluster_2
GO:0045229	external encapsulating structure organization	'13/70'	312/16001	0.0416667	9.5244	10.0793	8.04e-10	2.11e-07	2.02e-07	COL9A2/COL11A1/COL9A3/COMP/COL9A1/MATN3/COL2A1/COL8A1/MATN1/COL27A1/COL11A2/COL15A1/ZNF469	13	Cluster_2
GO:0060351	cartilage development involved in endochondral bone morphogenesis	'6/70'	33/16001	0.181818	41.561	15.4607	5.68e-09	1.24e-06	1.19e-06	ZMPSTE24/TRIP11/COMP/COL2A1/MATN1/COL27A1	6	Cluster_2
GO:0060350	endochondral bone morphogenesis	'7/70'	60/16001	0.116667	26.6683	13.2039	7.25e-09	1.36e-06	1.3e-06	FGFR3/ZMPSTE24/TRIP11/COMP/COL2A1/MATN1/COL27A1	7	Cluster_2
GO:0060348	bone development	'10/70'	210/16001	0.0476191	10.885	9.55808	2.45e-08	4.01e-06	3.85e-06	FGFR3/PTPRC/EPYC/ZMPSTE24/TRIP11/XYLT1/COMP/COL2A1/MATN1/COL27A1	10	Cluster_2
GO:0002062	Human_RNA_Clusters_Early_GO_Enrichments.csv	'8/70'	115/16001	0.0695652	15.9016	10.6307	3.63e-08	5.29e-06	5.07e-06	COL11A1/FGFR3/TRIP11/COMP/EFEMP1/COL2A1/MATN1/COL27A1	8	Cluster_2
GO:0003416	endochondral bone growth	'5/70'	28/16001	0.178571	40.8189	13.9786	1.26e-07	1.65e-05	1.59e-05	FGFR3/ZMPSTE24/COMP/MATN1/COL27A1	5	Cluster_2
GO:0060349	bone morphogenesis	'7/70'	97/16001	0.072165	16.4959	10.147	2.12e-07	2.36e-05	2.26e-05	FGFR3/ZMPSTE24/TRIP11/COMP/COL2A1/MATN1/COL27A1	7	Cluster_2
GO:0098868	bone growth	'5/70'	31/16001	0.16129	36.8687	13.2505	2.16e-07	2.36e-05	2.26e-05	FGFR3/ZMPSTE24/COMP/MATN1/COL27A1	5	Cluster_2
GO:0048705	skeletal system morphogenesis	'9/70'	221/16001	0.040724	9.30892	8.2447	4.87e-07	4.92e-05	4.71e-05	COL11A1/FGFR3/ZMPSTE24/TBX15/TRIP11/COMP/COL2A1/MATN1/COL27A1	9	Cluster_2
GO:0003417	growth plate cartilage development	'4/70'	19/16001	0.210526	48.1233	13.6234	1.24e-06	0.00011617	0.00011139	ZMPSTE24/COMP/MATN1/COL27A1	4	Cluster_2
GO:0030199	collagen fibril organization	'5/70'	65/16001	0.0769231	17.5835	8.88037	9.34e-06	0.0008175	0.00078385	COL11A1/COMP/COL2A1/COL27A1/COL11A2	5	Cluster_2
GO:0002063	chondrocyte development	'4/70'	32/16001	0.125	28.5732	10.3493	1.1e-05	0.00090347	0.00086628	COL11A1/COMP/MATN1/COL27A1	4	Cluster_2
GO:0003413	chondrocyte differentiation involved in endochondral bone morphogenesis	'3/70'	14/16001	0.214286	48.9827	11.9056	2.82e-05	0.00217769	0.00208804	TRIP11/MATN1/COL27A1	3	Cluster_2
GO:0035265	organ growth	'6/70'	155/16001	0.0387097	8.84848	6.50847	5.9e-05	0.00430176	0.00412466	FGFR3/ZMPSTE24/COMP/MATN1/IGF2/COL27A1	6	Cluster_2
GO:0001503	ossification	'9/70'	415/16001	0.0216868	4.95728	5.41428	7.81e-05	0.0053969	0.00517473	COL11A1/FGFR3/ZMPSTE24/XYLT1/COMP/COL2A1/MATN1/IGF2/FZD9	9	Cluster_2
GO:0050881	musculoskeletal movement	'4/70'	54/16001	0.0740741	16.9323	7.77361	9.01e-05	0.00591203	0.00566864	MYH14/COMP/TNNT3/TNNI1	4	Cluster_2
GO:0050954	sensory perception of mechanical stimulus	'6/70'	170/16001	0.0352941	8.06773	6.14098	9.84e-05	0.00615025	0.00589706	COL11A1/EPYC/MYH14/P2RX4/COL2A1/COL11A2	6	Cluster_2
GO:0050879	multicellular organismal movement	'4/70'	56/16001	0.0714286	16.3276	7.61626	0.0001039	0.00620101	0.00594573	MYH14/COMP/TNNT3/TNNI1	4	Cluster_2
GO:0030282	bone mineralization	'5/70'	123/16001	0.0406504	9.2921	6.11937	0.00020084	0.0114655	0.0109935	FGFR3/ZMPSTE24/COMP/MATN1/FZD9	5	Cluster_2
GO:0030500	regulation of bone mineralization	'4/70'	78/16001	0.0512821	11.7223	6.29234	0.00037536	0.0205354	0.01969	ZMPSTE24/COMP/MATN1/FZD9	4	Cluster_2
GO:0007605	sensory perception of sound	'5/70'	147/16001	0.0340136	7.77502	5.47	0.00045781	0.0240442	0.0230544	COL11A1/EPYC/MYH14/COL2A1/COL11A2	5	Cluster_2
GO:0006029	proteoglycan metabolic process	'4/70'	89/16001	0.0449438	10.2735	5.8152	0.00061973	0.0312962	0.0300078	COL11A1/XYLT1/CNMD/COL2A1	4	Cluster_2
GO:0050905	neuromuscular process	'5/70'	159/16001	0.0314465	7.18823	5.19813	0.00065436	0.031821	0.0305111	ZMPSTE24/MYH14/COMP/TNNT3/TNNI1	5	Cluster_2
GO:0031214	biomineral tissue development	'5/70'	168/16001	0.0297619	6.80315	5.01215	0.00083891	0.0382043	0.0366315	FGFR3/ZMPSTE24/COMP/MATN1/FZD9	5	Cluster_2
GO:0070167	regulation of biomineral tissue development	'4/70'	97/16001	0.0412371	9.42622	5.51763	0.00085667	0.0382043	0.0366315	ZMPSTE24/COMP/MATN1/FZD9	4	Cluster_2
GO:0003009	skeletal muscle contraction	'3/70'	43/16001	0.0697674	15.9478	6.50595	0.00087291	0.0382043	0.0366315	MYH14/TNNT3/TNNI1	3	Cluster_2
GO:0006356	regulation of transcription by RNA polymerase I	'3/70'	47/16001	0.0638298	14.5906	6.185	0.00113268	0.0479745	0.0459996	ZMPSTE24/CARM1/BEND3	3	Cluster_2
ID	Description	GeneRatio	BgRatio	pvalue	p.adjust	qvalue	geneID	Count	gene_set	Timepoint
GO:0048705	skeletal system morphogenesis	'23/226'	221/15836	9.58409e-14	1.63998e-10	1.50873e-10	HOXA11/COL11A1/FGFR3/ZMPSTE24/TBX15/TRIP11/COMP/COL1A1/PRRX1/SATB2/RDH10/TBX4/TWIST1/SIX1/HOXD9/HOXD10/TFAP2A/COL2A1/MATN1/MSX1/SOX11/COL27A1/IFITM5	23	ALL_DEGs	EARLY
GO:0051216	cartilage development	'22/226'	200/15836	1.08214e-13	1.63998e-10	1.50873e-10	HOXA11/CD44/COL11A1/FGFR3/PITX1/EPYC/ZMPSTE24/TRIP11/COMP/COL1A1/WNT5A/EFEMP1/PRRX1/SATB2/MATN3/CNMD/COL2A1/MATN1/MSX1/SNORC/COL27A1/COL11A2	22	ALL_DEGs	EARLY
GO:0035107	appendage morphogenesis	'17/226'	145/15836	2.69947e-11	2.04553e-08	1.88182e-08	HOXA11/TFAP2B/PITX1/FGF10/TBX5/WNT5A/PRRX1/RDH10/TBX4/TWIST1/HOXD9/HOXD10/TFAP2A/COL2A1/MSX1/HOXD12/SOX11	17	ALL_DEGs	EARLY
GO:0035108	limb morphogenesis	'17/226'	145/15836	2.69947e-11	2.04553e-08	1.88182e-08	HOXA11/TFAP2B/PITX1/FGF10/TBX5/WNT5A/PRRX1/RDH10/TBX4/TWIST1/HOXD9/HOXD10/TFAP2A/COL2A1/MSX1/HOXD12/SOX11	17	ALL_DEGs	EARLY
GO:0048706	embryonic skeletal system development	'16/226'	127/15836	3.50122e-11	2.12244e-08	1.95258e-08	HOXA11/COL11A1/TBX15/XYLT1/COL1A1/WNT5A/PRRX1/SATB2/RDH10/TWIST1/SIX1/HOXD9/HOXD10/TFAP2A/COL2A1/SOX11	16	ALL_DEGs	EARLY
GO:0061448	connective tissue development	'22/226'	269/15836	4.2534e-11	2.14868e-08	1.97671e-08	HOXA11/CD44/COL11A1/FGFR3/PITX1/EPYC/ZMPSTE24/TRIP11/COMP/COL1A1/WNT5A/EFEMP1/PRRX1/SATB2/MATN3/CNMD/COL2A1/MATN1/MSX1/SNORC/COL27A1/COL11A2	22	ALL_DEGs	EARLY
GO:0048736	appendage development	'18/226'	180/15836	1.01366e-10	3.84051e-08	3.53314e-08	HOXA11/TFAP2B/PITX1/FGF10/TBX5/COMP/WNT5A/PRRX1/RDH10/TBX4/TWIST1/HOXD9/HOXD10/TFAP2A/COL2A1/MSX1/HOXD12/SOX11	18	ALL_DEGs	EARLY
GO:0060173	limb development	'18/226'	180/15836	1.01366e-10	3.84051e-08	3.53314e-08	HOXA11/TFAP2B/PITX1/FGF10/TBX5/COMP/WNT5A/PRRX1/RDH10/TBX4/TWIST1/HOXD9/HOXD10/TFAP2A/COL2A1/MSX1/HOXD12/SOX11	18	ALL_DEGs	EARLY
GO:0030198	extracellular matrix organization	'22/226'	300/15836	3.49008e-10	1.12705e-07	1.03685e-07	IBSP/GPM6B/COL9A2/COL11A1/COL17A1/COL9A3/COMP/COL1A1/COL12A1/COL9A1/MATN3/COL2A1/COL8A1/ADAMTS19/GAS2/MATN1/COL1A2/ADAMTSL1/COL27A1/COL11A2/COL15A1/ZNF469	22	ALL_DEGs	EARLY
GO:0043062	extracellular structure organization	'22/226'	301/15836	3.7184e-10	1.12705e-07	1.03685e-07	IBSP/GPM6B/COL9A2/COL11A1/COL17A1/COL9A3/COMP/COL1A1/COL12A1/COL9A1/MATN3/COL2A1/COL8A1/ADAMTS19/GAS2/MATN1/COL1A2/ADAMTSL1/COL27A1/COL11A2/COL15A1/ZNF469	22	ALL_DEGs	EARLY
GO:0045229	external encapsulating structure organization	'22/226'	303/15836	4.21752e-10	1.16212e-07	1.06911e-07	IBSP/GPM6B/COL9A2/COL11A1/COL17A1/COL9A3/COMP/COL1A1/COL12A1/COL9A1/MATN3/COL2A1/COL8A1/ADAMTS19/GAS2/MATN1/COL1A2/ADAMTSL1/COL27A1/COL11A2/COL15A1/ZNF469	22	ALL_DEGs	EARLY
GO:0048704	embryonic skeletal system morphogenesis	'13/226'	92/15836	5.95469e-10	1.50406e-07	1.38368e-07	HOXA11/COL11A1/TBX15/PRRX1/SATB2/RDH10/TWIST1/SIX1/HOXD9/HOXD10/TFAP2A/COL2A1/SOX11	13	ALL_DEGs	EARLY
GO:0060349	bone morphogenesis	'13/226'	97/15836	1.16735e-09	2.72171e-07	2.50389e-07	HOXA11/FGFR3/ZMPSTE24/TRIP11/COMP/COL1A1/TWIST1/TFAP2A/COL2A1/MATN1/MSX1/COL27A1/IFITM5	13	ALL_DEGs	EARLY
GO:0035136	forelimb morphogenesis	'9/226'	40/15836	3.89912e-09	8.4416e-07	7.766e-07	HOXA11/TFAP2B/TBX5/RDH10/TWIST1/HOXD9/HOXD10/TFAP2A/MSX1	9	ALL_DEGs	EARLY
GO:0030326	embryonic limb morphogenesis	'13/226'	119/15836	1.48358e-08	2.67511e-06	2.46101e-06	HOXA11/PITX1/TBX5/WNT5A/PRRX1/RDH10/TBX4/TWIST1/HOXD9/HOXD10/TFAP2A/MSX1/HOXD12	13	ALL_DEGs	EARLY
GO:0035113	embryonic appendage morphogenesis	'13/226'	119/15836	1.48358e-08	2.67511e-06	2.46101e-06	HOXA11/PITX1/TBX5/WNT5A/PRRX1/RDH10/TBX4/TWIST1/HOXD9/HOXD10/TFAP2A/MSX1/HOXD12	13	ALL_DEGs	EARLY
GO:0048568	embryonic organ development	'24/226'	434/15836	1.50039e-08	2.67511e-06	2.46101e-06	HOXA11/COL11A1/FGF10/VASH1/TBX15/WNT5A/EFEMP1/PRRX1/SATB2/RDH10/TBX4/TWIST1/SIX1/HOXD9/HOXD10/TFAP2A/COL2A1/VASH2/MSX1/IGF2/SOX11/NR2F2/COL27A1/PLXNA4	24	ALL_DEGs	EARLY
GO:0060351	cartilage development involved in endochondral bone morphogenesis	'8/226'	34/15836	2.00525e-08	3.37661e-06	3.10637e-06	HOXA11/ZMPSTE24/TRIP11/COMP/COL1A1/COL2A1/MATN1/COL27A1	8	ALL_DEGs	EARLY
GO:0060350	endochondral bone morphogenesis	'9/226'	60/15836	1.64571e-07	2.62534e-05	2.41522e-05	HOXA11/FGFR3/ZMPSTE24/TRIP11/COMP/COL1A1/COL2A1/MATN1/COL27A1	9	ALL_DEGs	EARLY
GO:0060348	bone development	'16/226'	230/15836	2.01379e-07	3.05189e-05	2.80764e-05	HOXA11/FGFR3/PTPRC/EPYC/ZMPSTE24/TRIP11/XYLT1/COMP/COL1A1/TWIST1/TFAP2A/COL2A1/MATN1/MSX1/COL27A1/IFITM5	16	ALL_DEGs	EARLY
GO:0035115	embryonic forelimb morphogenesis	'7/226'	32/15836	2.72993e-07	3.94019e-05	3.62485e-05	HOXA11/TBX5/RDH10/TWIST1/HOXD9/TFAP2A/MSX1	7	ALL_DEGs	EARLY
GO:0001503	ossification	'21/226'	403/15836	3.37645e-07	4.65183e-05	4.27953e-05	IBSP/GPM6B/COL11A1/FGFR3/ZMPSTE24/XYLT1/COMP/COL1A1/WNT5A/SATB2/TWIST1/TFAP2A/COL2A1/CDH11/IGSF10/MATN1/COL1A2/IGF2/SOX11/FZD9/IFITM5	21	ALL_DEGs	EARLY
GO:0035137	hindlimb morphogenesis	'7/226'	34/15836	4.2586e-07	5.61209e-05	5.16294e-05	TFAP2B/PITX1/TBX4/TWIST1/HOXD9/HOXD10/MSX1	7	ALL_DEGs	EARLY
GO:0060021	roof of mouth development	'10/226'	89/15836	5.45714e-07	6.89191e-05	6.34034e-05	WNT5A/PRRX1/SATB2/TWIST1/WFIKKN1/TFAP2A/COL2A1/MSX1/SOX11/COL11A2	10	ALL_DEGs	EARLY
GO:0048562	embryonic organ morphogenesis	'17/226'	282/15836	6.35486e-07	7.70463e-05	7.08801e-05	HOXA11/COL11A1/FGF10/TBX15/WNT5A/EFEMP1/PRRX1/SATB2/RDH10/TWIST1/SIX1/HOXD9/HOXD10/TFAP2A/COL2A1/MSX1/SOX11	17	ALL_DEGs	EARLY
GO:0030282	bone mineralization	'11/226'	117/15836	9.03131e-07	0.000105284	9.68581e-05	IBSP/GPM6B/FGFR3/ZMPSTE24/COMP/TWIST1/TFAP2A/MATN1/COL1A2/FZD9/IFITM5	11	ALL_DEGs	EARLY
GO:0030199	collagen fibril organization	'8/226'	63/15836	2.99705e-06	0.000336447	0.00030952	COL11A1/COMP/COL1A1/COL12A1/COL2A1/COL1A2/COL27A1/COL11A2	8	ALL_DEGs	EARLY
GO:0031214	biomineral tissue development	'12/226'	161/15836	3.41997e-06	0.000370212	0.000340583	IBSP/GPM6B/FGFR3/ZMPSTE24/COMP/COL1A1/TWIST1/TFAP2A/MATN1/COL1A2/FZD9/IFITM5	12	ALL_DEGs	EARLY
GO:0090596	sensory organ morphogenesis	'15/226'	253/15836	3.62356e-06	0.000378724	0.000348414	TFAP2B/COL11A1/SDK2/FGF10/WNT5A/EFEMP1/PRRX1/TWIST1/SIX1/TFAP2A/COL2A1/COL8A1/MEGF11/MSX1/SOX11	15	ALL_DEGs	EARLY
GO:0060537	muscle tissue development	'19/226'	394/15836	3.91805e-06	0.000395854	0.000364172	CACNA1G/TFAP2B/HDAC9/COL11A1/PITX1/ZMPSTE24/TBX5/MYH14/WNT5A/TWIST1/SIX1/HOXD9/HOXD10/TNNI1/MSX1/IGF2/SOX11/NR2F2/NRAP	19	ALL_DEGs	EARLY
GO:0030278	regulation of ossification	'10/226'	115/15836	5.79196e-06	0.000566305	0.000520982	GPM6B/ZMPSTE24/COMP/WNT5A/TWIST1/TFAP2A/MATN1/SOX11/FZD9/IFITM5	10	ALL_DEGs	EARLY
GO:0060900	embryonic camera-type eye formation	'4/226'	10/15836	7.93014e-06	0.000751133	0.000691018	WNT5A/TWIST1/TFAP2A/SOX11	4	ALL_DEGs	EARLY
GO:0031076	embryonic camera-type eye development	'6/226'	36/15836	1.07645e-05	0.000988706	0.000909577	FGF10/WNT5A/RDH10/TWIST1/TFAP2A/SOX11	6	ALL_DEGs	EARLY
GO:0030500	regulation of bone mineralization	'8/226'	76/15836	1.24458e-05	0.00110951	0.00102071	GPM6B/ZMPSTE24/COMP/TWIST1/TFAP2A/MATN1/FZD9/IFITM5	8	ALL_DEGs	EARLY
GO:0007517	muscle organ development	'16/226'	333/15836	2.42734e-05	0.00210208	0.00193384	HDAC9/COL11A1/PITX1/MYH14/WNT5A/TWIST1/SIX1/HOXD9/HOXD10/TNNI1/MSX1/IGF2/EID2B/BASP1/SOX11/NR2F2	16	ALL_DEGs	EARLY
GO:0048701	embryonic cranial skeleton morphogenesis	'6/226'	43/15836	3.0999e-05	0.00260994	0.00240106	TBX15/PRRX1/RDH10/TWIST1/SIX1/TFAP2A	6	ALL_DEGs	EARLY
GO:0002062	chondrocyte differentiation	'9/226'	112/15836	3.21989e-05	0.0026377	0.0024266	HOXA11/COL11A1/FGFR3/TRIP11/COMP/EFEMP1/COL2A1/MATN1/COL27A1	9	ALL_DEGs	EARLY
GO:0042471	ear morphogenesis	'9/226'	114/15836	3.70605e-05	0.00295606	0.00271948	COL11A1/FGF10/WNT5A/PRRX1/TWIST1/SIX1/TFAP2A/COL2A1/MSX1	9	ALL_DEGs	EARLY
GO:0060538	skeletal muscle organ development	'11/226'	173/15836	3.89728e-05	0.00302888	0.00278647	HDAC9/PITX1/MYH14/TWIST1/SIX1/HOXD9/HOXD10/IGF2/BASP1/SOX11/NR2F2	11	ALL_DEGs	EARLY
GO:0003416	endochondral bone growth	'5/226'	29/15836	5.08555e-05	0.00385357	0.00354516	FGFR3/ZMPSTE24/COMP/MATN1/COL27A1	5	ALL_DEGs	EARLY
GO:0070167	regulation of biomineral tissue development	'8/226'	95/15836	6.36171e-05	0.00470301	0.00432662	GPM6B/ZMPSTE24/COMP/TWIST1/TFAP2A/MATN1/FZD9/IFITM5	8	ALL_DEGs	EARLY
GO:0001708	cell fate specification	'8/226'	96/15836	6.85593e-05	0.0049477	0.00455172	HOXA11/TBX5/TBX15/WNT5A/TBX4/SIX1/HOXD10/CHD3	8	ALL_DEGs	EARLY
GO:0002063	chondrocyte development	'5/226'	32/15836	8.32837e-05	0.00573711	0.00527795	HOXA11/COL11A1/COMP/MATN1/COL27A1	5	ALL_DEGs	EARLY
GO:0098868	bone growth	'5/226'	32/15836	8.32837e-05	0.00573711	0.00527795	FGFR3/ZMPSTE24/COMP/MATN1/COL27A1	5	ALL_DEGs	EARLY
GO:0060602	branch elongation of an epithelium	'4/226'	18/15836	0.00010562	0.00702197	0.00645999	FGF10/WNT5A/RDH10/SIX1	4	ALL_DEGs	EARLY
GO:0007519	skeletal muscle tissue development	'10/226'	161/15836	0.000106569	0.00702197	0.00645999	HDAC9/PITX1/MYH14/TWIST1/SIX1/HOXD9/HOXD10/IGF2/SOX11/NR2F2	10	ALL_DEGs	EARLY
GO:0048048	embryonic eye morphogenesis	'5/226'	34/15836	0.000112439	0.0072511	0.00667077	WNT5A/EFEMP1/TWIST1/TFAP2A/SOX11	5	ALL_DEGs	EARLY
GO:0003417	growth plate cartilage development	'4/226'	20/15836	0.000163524	0.0103259	0.00949948	ZMPSTE24/COMP/MATN1/COL27A1	4	ALL_DEGs	EARLY
GO:0043516	regulation of DNA damage response, signal transduction by p53 class mediator	'5/226'	37/15836	0.000170116	0.0105229	0.00968072	CD44/ZMPSTE24/TWIST1/MDM2/MSX1	5	ALL_DEGs	EARLY
GO:0043583	ear development	'11/226'	205/15836	0.000178333	0.0108106	0.00994535	COL11A1/FGF10/TRIP11/WNT5A/PRRX1/RDH10/TWIST1/SIX1/TFAP2A/COL2A1/MSX1	11	ALL_DEGs	EARLY
GO:0045165	cell fate commitment	'12/226'	242/15836	0.000190855	0.0113428	0.010435	HOXA11/PITX1/FGF10/TBX5/TBX15/WNT5A/PRRX1/TBX4/SIX1/HOXD10/CHD3/NR2F2	12	ALL_DEGs	EARLY
GO:0001759	organ induction	'4/226'	22/15836	0.000241421	0.0138065	0.0127016	HOXA11/FGF10/WNT5A/SIX1	4	ALL_DEGs	EARLY
GO:0010842	retina layer formation	'4/226'	22/15836	0.000241421	0.0138065	0.0127016	TFAP2B/SDK2/TFAP2A/MEGF11	4	ALL_DEGs	EARLY
GO:0048645	animal organ formation	'6/226'	62/15836	0.000249485	0.0140035	0.0128828	HOXA11/FGF10/TBX5/WNT5A/RDH10/SIX1	6	ALL_DEGs	EARLY
GO:0048592	eye morphogenesis	'9/226'	149/15836	0.000290017	0.0159826	0.0147035	TFAP2B/SDK2/WNT5A/EFEMP1/TWIST1/TFAP2A/COL8A1/MEGF11/SOX11	9	ALL_DEGs	EARLY
GO:0003231	cardiac ventricle development	'8/226'	121/15836	0.000343139	0.0180038	0.0165629	COL11A1/ZMPSTE24/TBX5/TRIP11/WNT5A/MDM2/TNNI1/SOX11	8	ALL_DEGs	EARLY
GO:0048593	camera-type eye morphogenesis	'8/226'	121/15836	0.000343139	0.0180038	0.0165629	TFAP2B/SDK2/WNT5A/TWIST1/TFAP2A/COL8A1/MEGF11/SOX11	8	ALL_DEGs	EARLY
GO:0048483	autonomic nervous system development	'5/226'	43/15836	0.000350453	0.0180038	0.0165629	TFAP2B/SIX1/TFAP2A/SOX11/PLXNA4	5	ALL_DEGs	EARLY
GO:2000648	positive regulation of stem cell proliferation	'5/226'	43/15836	0.000350453	0.0180038	0.0165629	FGF10/PTPRC/WNT5A/PRRX1/SOX11	5	ALL_DEGs	EARLY
GO:0042472	inner ear morphogenesis	'7/226'	93/15836	0.000367819	0.018581	0.0170939	COL11A1/FGF10/WNT5A/PRRX1/SIX1/TFAP2A/COL2A1	7	ALL_DEGs	EARLY
GO:0035265	organ growth	'9/226'	155/15836	0.000388165	0.0192873	0.0177437	FGFR3/FGF10/ZMPSTE24/TBX5/COMP/MATN1/IGF2/BASP1/COL27A1	9	ALL_DEGs	EARLY
GO:0048596	embryonic camera-type eye morphogenesis	'4/226'	25/15836	0.000403714	0.0197364	0.0181568	WNT5A/TWIST1/TFAP2A/SOX11	4	ALL_DEGs	EARLY
GO:1904888	cranial skeletal system development	'6/226'	68/15836	0.000413758	0.0199064	0.0183132	TBX15/PRRX1/RDH10/TWIST1/SIX1/TFAP2A	6	ALL_DEGs	EARLY
GO:0060174	limb bud formation	'3/226'	11/15836	0.000434869	0.0202783	0.0186554	FGF10/COL2A1/SOX11	3	ALL_DEGs	EARLY
GO:0070234	positive regulation of T cell apoptotic process	'3/226'	11/15836	0.000434869	0.0202783	0.0186554	WNT5A/ZC3H8/PDCD1	3	ALL_DEGs	EARLY
GO:0003156	regulation of animal organ formation	'4/226'	26/15836	0.000471813	0.0216676	0.0199335	HOXA11/FGF10/WNT5A/SIX1	4	ALL_DEGs	EARLY
GO:0030330	DNA damage response, signal transduction by p53 class mediator	'6/226'	71/15836	0.00052254	0.0236391	0.0217472	CD44/ZMPSTE24/TWIST1/MDM2/PLK2/MSX1	6	ALL_DEGs	EARLY
GO:0035116	embryonic hindlimb morphogenesis	'4/226'	27/15836	0.000547713	0.0244135	0.0224596	PITX1/TBX4/TWIST1/MSX1	4	ALL_DEGs	EARLY
GO:0007389	pattern specification process	'16/226'	439/15836	0.000582717	0.0255973	0.0235487	HOXA11/FGF10/TBX5/LHX2/WNT5A/SATB2/SIX1/HOXD9/HOXD10/HOXD11/BHLHE40/SHROOM3/MSX1/HOXD12/BASP1/NR2F2	16	ALL_DEGs	EARLY
GO:0043010	camera-type eye development	'13/226'	315/15836	0.000612577	0.0265246	0.0244018	TFAP2B/SDK2/FGF10/LHX2/WNT5A/EFEMP1/RDH10/TWIST1/TFAP2A/COL8A1/MEGF11/SOX11/MAB21L2	13	ALL_DEGs	EARLY
GO:0003401	axis elongation	'4/226'	28/15836	0.000631902	0.0268965	0.0247439	FGF10/WNT5A/RDH10/SIX1	4	ALL_DEGs	EARLY
GO:0050954	sensory perception of mechanical stimulus	'9/226'	166/15836	0.000638913	0.0268965	0.0247439	COL11A1/EPYC/MYH14/COL1A1/SIX1/P2RX4/TFAP2A/COL2A1/COL11A2	9	ALL_DEGs	EARLY
GO:2000677	regulation of transcription regulatory region DNA binding	'5/226'	50/15836	0.000711433	0.0291912	0.026855	ZMPSTE24/LHX2/TWIST1/MSX1/SOX11	5	ALL_DEGs	EARLY
GO:0001936	regulation of endothelial cell proliferation	'8/226'	135/15836	0.000712685	0.0291912	0.026855	FGF10/VASH1/WNT5A/CNMD/VASH2/EMC10/IGF2/NR2F2	8	ALL_DEGs	EARLY
GO:0045778	positive regulation of ossification	'5/226'	51/15836	0.000779711	0.0315107	0.0289888	GPM6B/WNT5A/TFAP2A/SOX11/FZD9	5	ALL_DEGs	EARLY
GO:0048934	peripheral nervous system neuron differentiation	'3/226'	14/15836	0.000929446	0.0352144	0.0323961	HOXD9/HOXD10/TBCE	3	ALL_DEGs	EARLY
GO:0048935	peripheral nervous system neuron development	'3/226'	14/15836	0.000929446	0.0352144	0.0323961	HOXD9/HOXD10/TBCE	3	ALL_DEGs	EARLY
GO:0061029	eyelid development in camera-type eye	'3/226'	14/15836	0.000929446	0.0352144	0.0323961	TWIST1/TFAP2A/SOX11	3	ALL_DEGs	EARLY
GO:0070230	positive regulation of lymphocyte apoptotic process	'3/226'	14/15836	0.000929446	0.0352144	0.0323961	WNT5A/ZC3H8/PDCD1	3	ALL_DEGs	EARLY
GO:0071599	otic vesicle development	'3/226'	14/15836	0.000929446	0.0352144	0.0323961	FGF10/SIX1/COL2A1	3	ALL_DEGs	EARLY
GO:0003007	heart morphogenesis	'11/226'	251/15836	0.000983624	0.036807	0.0338612	COL11A1/ZMPSTE24/TBX5/WNT5A/TWIST1/SIX1/MDM2/COL2A1/TNNI1/MSX1/SOX11	11	ALL_DEGs	EARLY
GO:0031128	developmental induction	'4/226'	32/15836	0.00106137	0.0387592	0.0356572	HOXA11/FGF10/WNT5A/SIX1	4	ALL_DEGs	EARLY
GO:0110110	positive regulation of animal organ morphogenesis	'4/226'	32/15836	0.00106137	0.0387592	0.0356572	HOXA11/FGF10/WNT5A/SIX1	4	ALL_DEGs	EARLY
GO:0007605	sensory perception of sound	'8/226'	144/15836	0.00108543	0.039166	0.0360314	COL11A1/EPYC/MYH14/COL1A1/SIX1/TFAP2A/COL2A1/COL11A2	8	ALL_DEGs	EARLY
GO:0003413	chondrocyte differentiation involved in endochondral bone morphogenesis	'3/226'	15/15836	0.00114963	0.0400519	0.0368464	TRIP11/MATN1/COL27A1	3	ALL_DEGs	EARLY
GO:0043518	negative regulation of DNA damage response, signal transduction by p53 class mediator	'3/226'	15/15836	0.00114963	0.0400519	0.0368464	CD44/TWIST1/MDM2	3	ALL_DEGs	EARLY
GO:0060572	morphogenesis of an epithelial bud	'3/226'	15/15836	0.00114963	0.0400519	0.0368464	FGF10/WNT5A/RDH10	3	ALL_DEGs	EARLY
GO:0010092	specification of animal organ identity	'4/226'	33/15836	0.00119439	0.0411384	0.037846	HOXA11/FGF10/WNT5A/SIX1	4	ALL_DEGs	EARLY
GO:0001656	metanephros development	'6/226'	84/15836	0.00127221	0.0433268	0.0398592	HOXA11/TFAP2B/FGF10/RDH10/SIX1/BASP1	6	ALL_DEGs	EARLY
GO:0010634	positive regulation of epithelial cell migration	'8/226'	148/15836	0.00129458	0.0435987	0.0401093	HDAC9/FGF10/MAP4K4/WNT5A/P2RX4/BCAS3/PLK2/EMC10	8	ALL_DEGs	EARLY
GO:0009954	proximal/distal pattern formation	'4/226'	34/15836	0.00133864	0.0445287	0.0409649	HOXA11/FGF10/HOXD9/HOXD10	4	ALL_DEGs	EARLY
GO:0016331	morphogenesis of embryonic epithelium	'8/226'	149/15836	0.00135158	0.0445287	0.0409649	FGF10/LHX2/WNT5A/RDH10/TWIST1/SIX1/TFAP2A/SOX11	8	ALL_DEGs	EARLY
GO:0021783	preganglionic parasympathetic fiber development	'3/226'	16/15836	0.0014001	0.0452401	0.0416195	SIX1/TFAP2A/PLXNA4	3	ALL_DEGs	EARLY
GO:0042733	embryonic digit morphogenesis	'5/226'	58/15836	0.00140303	0.0452401	0.0416195	HOXA11/WNT5A/TWIST1/MSX1/HOXD12	5	ALL_DEGs	EARLY
GO:0001942	hair follicle development	'6/226'	86/15836	0.00143726	0.0456271	0.0419754	FGF10/ZMPSTE24/LHX2/WNT5A/KRT17/APCDD1	6	ALL_DEGs	EARLY
GO:0010632	regulation of epithelial cell migration	'10/226'	224/15836	0.00144513	0.0456271	0.0419754	HDAC9/FGF10/MAP4K4/VASH1/WNT5A/P2RX4/BCAS3/PLK2/EMC10/NR2F2	10	ALL_DEGs	EARLY
GO:0001935	endothelial cell proliferation	'8/226'	151/15836	0.00147156	0.0459823	0.0423023	FGF10/VASH1/WNT5A/CNMD/VASH2/EMC10/IGF2/NR2F2	8	ALL_DEGs	EARLY
GO:0035137	hindlimb morphogenesis	'4/68'	34/15836	1.30847e-05	0.0163559	0.0157292	PITX1/TBX4/HOXD9/HOXD10	4	Cluster_0	EARLY
GO:0035107	appendage morphogenesis	'11/84'	145/15836	2.71299e-10	2.675e-07	2.26035e-07	HOXA11/TFAP2B/FGF10/WNT5A/PRRX1/RDH10/TWIST1/TFAP2A/MSX1/HOXD12/SOX11	11	Cluster_1	EARLY
GO:0035108	limb morphogenesis	'11/84'	145/15836	2.71299e-10	2.675e-07	2.26035e-07	HOXA11/TFAP2B/FGF10/WNT5A/PRRX1/RDH10/TWIST1/TFAP2A/MSX1/HOXD12/SOX11	11	Cluster_1	EARLY
GO:0048736	appendage development	'11/84'	180/15836	2.72409e-09	1.34298e-06	1.1348e-06	HOXA11/TFAP2B/FGF10/WNT5A/PRRX1/RDH10/TWIST1/TFAP2A/MSX1/HOXD12/SOX11	11	Cluster_1	EARLY
GO:0060173	limb development	'11/84'	180/15836	2.72409e-09	1.34298e-06	1.1348e-06	HOXA11/TFAP2B/FGF10/WNT5A/PRRX1/RDH10/TWIST1/TFAP2A/MSX1/HOXD12/SOX11	11	Cluster_1	EARLY
GO:0048706	embryonic skeletal system development	'9/84'	127/15836	2.28707e-08	9.02021e-06	7.62197e-06	HOXA11/COL1A1/WNT5A/PRRX1/SATB2/RDH10/TWIST1/TFAP2A/SOX11	9	Cluster_1	EARLY
GO:0031076	embryonic camera-type eye development	'6/84'	36/15836	3.18668e-08	1.04736e-05	8.85003e-06	FGF10/WNT5A/RDH10/TWIST1/TFAP2A/SOX11	6	Cluster_1	EARLY
GO:0035136	forelimb morphogenesis	'6/84'	40/15836	6.17447e-08	1.73944e-05	1.4698e-05	HOXA11/TFAP2B/RDH10/TWIST1/TFAP2A/MSX1	6	Cluster_1	EARLY
GO:0060900	embryonic camera-type eye formation	'4/84'	10/15836	1.50975e-07	3.72154e-05	3.14466e-05	WNT5A/TWIST1/TFAP2A/SOX11	4	Cluster_1	EARLY
GO:0030326	embryonic limb morphogenesis	'8/84'	119/15836	2.17173e-07	4.28265e-05	3.61879e-05	HOXA11/WNT5A/PRRX1/RDH10/TWIST1/TFAP2A/MSX1/HOXD12	8	Cluster_1	EARLY
GO:0035113	embryonic appendage morphogenesis	'8/84'	119/15836	2.17173e-07	4.28265e-05	3.61879e-05	HOXA11/WNT5A/PRRX1/RDH10/TWIST1/TFAP2A/MSX1/HOXD12	8	Cluster_1	EARLY
GO:0048568	embryonic organ development	'13/84'	434/15836	4.39114e-07	7.30577e-05	6.17329e-05	HOXA11/FGF10/WNT5A/PRRX1/SATB2/RDH10/TWIST1/TFAP2A/VASH2/MSX1/SOX11/NR2F2/PLXNA4	13	Cluster_1	EARLY
GO:0060021	roof of mouth development	'7/84'	89/15836	4.4457e-07	7.30577e-05	6.17329e-05	WNT5A/PRRX1/SATB2/TWIST1/TFAP2A/MSX1/SOX11	7	Cluster_1	EARLY
GO:0048704	embryonic skeletal system morphogenesis	'7/84'	92/15836	5.58066e-07	8.46543e-05	7.15318e-05	HOXA11/PRRX1/SATB2/RDH10/TWIST1/TFAP2A/SOX11	7	Cluster_1	EARLY
GO:0035115	embryonic forelimb morphogenesis	'5/84'	32/15836	6.69852e-07	9.43534e-05	7.97275e-05	HOXA11/RDH10/TWIST1/TFAP2A/MSX1	5	Cluster_1	EARLY
GO:0048562	embryonic organ morphogenesis	'10/84'	282/15836	2.36421e-06	0.000310815	0.000262635	HOXA11/FGF10/WNT5A/PRRX1/SATB2/RDH10/TWIST1/TFAP2A/MSX1/SOX11	10	Cluster_1	EARLY
GO:0048705	skeletal system morphogenesis	'9/84'	221/15836	2.53547e-06	0.000312497	0.000264056	HOXA11/COL1A1/PRRX1/SATB2/RDH10/TWIST1/TFAP2A/MSX1/SOX11	9	Cluster_1	EARLY
GO:0042476	odontogenesis	'7/84'	127/15836	4.90391e-06	0.000568854	0.000480674	FGF10/COL1A1/TWIST1/TFAP2A/APCDD1/MSX1/COL1A2	7	Cluster_1	EARLY
GO:0048596	embryonic camera-type eye morphogenesis	'4/84'	25/15836	8.55914e-06	0.000937702	0.000792347	WNT5A/TWIST1/TFAP2A/SOX11	4	Cluster_1	EARLY
GO:0042733	embryonic digit morphogenesis	'5/84'	58/15836	1.36807e-05	0.00138159	0.00116743	HOXA11/WNT5A/TWIST1/MSX1/HOXD12	5	Cluster_1	EARLY
GO:0016331	morphogenesis of embryonic epithelium	'7/84'	149/15836	1.40121e-05	0.00138159	0.00116743	FGF10/LHX2/WNT5A/RDH10/TWIST1/TFAP2A/SOX11	7	Cluster_1	EARLY
GO:0048048	embryonic eye morphogenesis	'4/84'	34/15836	3.02585e-05	0.00281371	0.00237755	WNT5A/TWIST1/TFAP2A/SOX11	4	Cluster_1	EARLY
GO:0042471	ear morphogenesis	'6/84'	114/15836	3.13902e-05	0.00281371	0.00237755	FGF10/WNT5A/PRRX1/TWIST1/TFAP2A/MSX1	6	Cluster_1	EARLY
GO:0061029	eyelid development in camera-type eye	'3/84'	14/15836	5.02426e-05	0.00430776	0.00364	TWIST1/TFAP2A/SOX11	3	Cluster_1	EARLY
GO:0001503	ossification	'10/84'	403/15836	5.25183e-05	0.00431526	0.00364634	IBSP/COL1A1/WNT5A/SATB2/TWIST1/TFAP2A/CDH11/IGSF10/COL1A2/SOX11	10	Cluster_1	EARLY
GO:0090596	sensory organ morphogenesis	'8/84'	253/15836	5.81295e-05	0.00458526	0.00387449	TFAP2B/FGF10/WNT5A/PRRX1/TWIST1/TFAP2A/MSX1/SOX11	8	Cluster_1	EARLY
GO:0060572	morphogenesis of an epithelial bud	'3/84'	15/15836	6.25629e-05	0.00474515	0.0040096	FGF10/WNT5A/RDH10	3	Cluster_1	EARLY
GO:0043588	skin development	'8/84'	260/15836	7.03957e-05	0.00510414	0.00431293	TFAP2B/FGF10/LHX2/COL1A1/WNT5A/KRT17/APCDD1/COL1A2	8	Cluster_1	EARLY
GO:0048483	autonomic nervous system development	'4/84'	43/15836	7.76492e-05	0.00510414	0.00431293	TFAP2B/TFAP2A/SOX11/PLXNA4	4	Cluster_1	EARLY
GO:0048701	embryonic cranial skeleton morphogenesis	'4/84'	43/15836	7.76492e-05	0.00510414	0.00431293	PRRX1/RDH10/TWIST1/TFAP2A	4	Cluster_1	EARLY
GO:2000648	positive regulation of stem cell proliferation	'4/84'	43/15836	7.76492e-05	0.00510414	0.00431293	FGF10/WNT5A/PRRX1/SOX11	4	Cluster_1	EARLY
GO:0001656	metanephros development	'5/84'	84/15836	8.275e-05	0.00526397	0.00444799	HOXA11/TFAP2B/FGF10/RDH10/BASP1	5	Cluster_1	EARLY
GO:0051216	cartilage development	'7/84'	200/15836	9.18803e-05	0.00553228	0.00467471	HOXA11/CD44/COL1A1/WNT5A/PRRX1/SATB2/MSX1	7	Cluster_1	EARLY
GO:0001942	hair follicle development	'5/84'	86/15836	9.25787e-05	0.00553228	0.00467471	FGF10/LHX2/WNT5A/KRT17/APCDD1	5	Cluster_1	EARLY
GO:0007389	pattern specification process	'10/84'	439/15836	0.000106881	0.00575604	0.00486378	HOXA11/FGF10/LHX2/WNT5A/SATB2/SHROOM3/MSX1/HOXD12/BASP1/NR2F2	10	Cluster_1	EARLY
GO:0043583	ear development	'7/84'	205/15836	0.000107201	0.00575604	0.00486378	FGF10/WNT5A/PRRX1/RDH10/TWIST1/TFAP2A/MSX1	7	Cluster_1	EARLY
GO:0022404	molting cycle process	'5/84'	89/15836	0.000108977	0.00575604	0.00486378	FGF10/LHX2/WNT5A/KRT17/APCDD1	5	Cluster_1	EARLY
GO:0022405	hair cycle process	'5/84'	89/15836	0.000108977	0.00575604	0.00486378	FGF10/LHX2/WNT5A/KRT17/APCDD1	5	Cluster_1	EARLY
GO:0060602	branch elongation of an epithelium	'3/84'	18/15836	0.000110918	0.00575604	0.00486378	FGF10/WNT5A/RDH10	3	Cluster_1	EARLY
GO:2000678	negative regulation of transcription regulatory region DNA binding	'3/84'	19/15836	0.000131211	0.00662376	0.00559699	LHX2/MSX1/SOX11	3	Cluster_1	EARLY
GO:0010634	positive regulation of epithelial cell migration	'6/84'	148/15836	0.000134356	0.00662376	0.00559699	HDAC9/FGF10/MAP4K4/WNT5A/BCAS3/PLK2	6	Cluster_1	EARLY
GO:2000677	regulation of transcription regulatory region DNA binding	'4/84'	50/15836	0.000140873	0.00677566	0.00572535	LHX2/TWIST1/MSX1/SOX11	4	Cluster_1	EARLY
GO:0035148	tube formation	'6/84'	151/15836	0.000149956	0.00704077	0.00594937	FGF10/LHX2/WNT5A/TWIST1/BCAS3/SOX11	6	Cluster_1	EARLY
GO:0060485	mesenchyme development	'8/84'	292/15836	0.000157274	0.00721268	0.00609463	FGF10/COL1A1/WNT5A/RDH10/TWIST1/MSX1/BASP1/SOX11	8	Cluster_1	EARLY
GO:0060349	bone morphogenesis	'5/84'	97/15836	0.000163687	0.00733615	0.00619896	HOXA11/COL1A1/TWIST1/TFAP2A/MSX1	5	Cluster_1	EARLY
GO:0048485	sympathetic nervous system development	'3/84'	21/15836	0.000178719	0.00778497	0.00657821	TFAP2B/SOX11/PLXNA4	3	Cluster_1	EARLY
GO:0001822	kidney development	'8/84'	299/15836	0.000184914	0.00778497	0.00657821	HOXA11/TFAP2B/FGF10/WNT5A/RDH10/TFAP2A/BASP1/SOX11	8	Cluster_1	EARLY
GO:0010632	regulation of epithelial cell migration	'7/84'	224/15836	0.000185545	0.00778497	0.00657821	HDAC9/FGF10/MAP4K4/WNT5A/BCAS3/PLK2/NR2F2	7	Cluster_1	EARLY
GO:0001759	organ induction	'3/84'	22/15836	0.000206146	0.00846918	0.00715635	HOXA11/FGF10/WNT5A	3	Cluster_1	EARLY
GO:0030510	regulation of BMP signaling pathway	'5/84'	104/15836	0.000226906	0.00899792	0.00760313	TFAP2B/WNT5A/MSX1/FSTL5/SOX11	5	Cluster_1	EARLY
GO:0072001	renal system development	'8/84'	309/15836	0.000231235	0.00899792	0.00760313	HOXA11/TFAP2B/FGF10/WNT5A/RDH10/TFAP2A/BASP1/SOX11	8	Cluster_1	EARLY
GO:0042303	molting cycle	'5/84'	105/15836	0.000237268	0.00899792	0.00760313	FGF10/LHX2/WNT5A/KRT17/APCDD1	5	Cluster_1	EARLY
GO:0042633	hair cycle	'5/84'	105/15836	0.000237268	0.00899792	0.00760313	FGF10/LHX2/WNT5A/KRT17/APCDD1	5	Cluster_1	EARLY
GO:0048762	mesenchymal cell differentiation	'7/84'	235/15836	0.000248794	0.00925702	0.00782207	FGF10/COL1A1/WNT5A/RDH10/TWIST1/MSX1/SOX11	7	Cluster_1	EARLY
GO:0043010	camera-type eye development	'8/84'	315/15836	0.000263332	0.00961648	0.00812581	TFAP2B/FGF10/LHX2/WNT5A/RDH10/TWIST1/TFAP2A/SOX11	8	Cluster_1	EARLY
GO:0060571	morphogenesis of an epithelial fold	'3/84'	24/15836	0.000268868	0.00964016	0.00814581	FGF10/WNT5A/RDH10	3	Cluster_1	EARLY
GO:0009880	embryonic pattern specification	'4/84'	62/15836	0.00032514	0.0112487	0.00950502	FGF10/WNT5A/SATB2/BASP1	4	Cluster_1	EARLY
GO:0048645	animal organ formation	'4/84'	62/15836	0.00032514	0.0112487	0.00950502	HOXA11/FGF10/WNT5A/RDH10	4	Cluster_1	EARLY
GO:0003156	regulation of animal organ formation	'3/84'	26/15836	0.000342751	0.0116535	0.00984709	HOXA11/FGF10/WNT5A	3	Cluster_1	EARLY
GO:0098773	skin epidermis development	'5/84'	116/15836	0.00037658	0.0125867	0.0106356	FGF10/LHX2/WNT5A/KRT17/APCDD1	5	Cluster_1	EARLY
GO:0003401	axis elongation	'3/84'	28/15836	0.000428575	0.0140858	0.0119023	FGF10/WNT5A/RDH10	3	Cluster_1	EARLY
GO:0007548	sex differentiation	'7/84'	258/15836	0.000437343	0.0141384	0.0119468	HOXA11/FGF10/WNT5A/RDH10/LHX9/BASP1/NR2F2	7	Cluster_1	EARLY
GO:0048593	camera-type eye morphogenesis	'5/84'	121/15836	0.000457201	0.0145036	0.0122554	TFAP2B/WNT5A/TWIST1/TFAP2A/SOX11	5	Cluster_1	EARLY
GO:1904888	cranial skeletal system development	'4/84'	68/15836	0.000463351	0.0145036	0.0122554	PRRX1/RDH10/TWIST1/TFAP2A	4	Cluster_1	EARLY
GO:2000027	regulation of animal organ morphogenesis	'5/84'	123/15836	0.000492851	0.015186	0.012832	HOXA11/FGF10/WNT5A/APCDD1/MSX1	5	Cluster_1	EARLY
GO:0030330	DNA damage response, signal transduction by p53 class mediator	'4/84'	71/15836	0.000546195	0.0165707	0.0140021	CD44/TWIST1/PLK2/MSX1	4	Cluster_1	EARLY
GO:0061448	connective tissue development	'7/84'	269/15836	0.000560985	0.0167615	0.0141633	HOXA11/CD44/COL1A1/WNT5A/PRRX1/SATB2/MSX1	7	Cluster_1	EARLY
GO:0051098	regulation of binding	'8/84'	355/15836	0.000583564	0.0171759	0.0145135	TMEM132A/LHX2/BAG2/WNT5A/TWIST1/EPB41/MSX1/SOX11	8	Cluster_1	EARLY
GO:0001654	eye development	'8/84'	359/15836	0.000628043	0.0180025	0.0152119	TFAP2B/FGF10/LHX2/WNT5A/RDH10/TWIST1/TFAP2A/SOX11	8	Cluster_1	EARLY
GO:0031128	developmental induction	'3/84'	32/15836	0.000639033	0.0180025	0.0152119	HOXA11/FGF10/WNT5A	3	Cluster_1	EARLY
GO:0110110	positive regulation of animal organ morphogenesis	'3/84'	32/15836	0.000639033	0.0180025	0.0152119	HOXA11/FGF10/WNT5A	3	Cluster_1	EARLY
GO:0048608	reproductive structure development	'7/84'	277/15836	0.00066727	0.0184938	0.015627	HOXA11/FGF10/WNT5A/RDH10/LHX9/BASP1/NR2F2	7	Cluster_1	EARLY
GO:0150063	visual system development	'8/84'	363/15836	0.000675229	0.0184938	0.015627	TFAP2B/FGF10/LHX2/WNT5A/RDH10/TWIST1/TFAP2A/SOX11	8	Cluster_1	EARLY
GO:0010092	specification of animal organ identity	'3/84'	33/15836	0.000700256	0.0189165	0.0159842	HOXA11/FGF10/WNT5A	3	Cluster_1	EARLY
GO:0061458	reproductive system development	'7/84'	281/15836	0.0007261	0.019269	0.0162821	HOXA11/FGF10/WNT5A/RDH10/LHX9/BASP1/NR2F2	7	Cluster_1	EARLY
GO:0048880	sensory system development	'8/84'	368/15836	0.000738202	0.019269	0.0162821	TFAP2B/FGF10/LHX2/WNT5A/RDH10/TWIST1/TFAP2A/SOX11	8	Cluster_1	EARLY
GO:0072091	regulation of stem cell proliferation	'4/84'	77/15836	0.000742619	0.019269	0.0162821	FGF10/WNT5A/PRRX1/SOX11	4	Cluster_1	EARLY
[truncated: 502 more rows]

## Sheet: Late Module GO Enrichments
ID	Description	GeneRatio	BgRatio	RichFactor	FoldEnrichment	zScore	pvalue	p.adjust	qvalue	geneID	Count	gene_set
[truncated: 469 more rows]

[truncated: 4 more sheets: All DEGs GO Enrichments, Timepoint DEGs, Timepoint DEGs GO Enrichments, Pairwise DEGs Digs. I, III, V]
